1 **Original Article**

2

3 **Early Reduction of SARS-CoV-2 Replication in Bronchial Epithelium by**

4 **Kinin B<sub>2</sub> Receptor Antagonism**

5 **Short title:** B<sub>2</sub>R Antagonist Suppresses SARS-CoV-2 Replication

6

7 Constanze A. Jakwerth<sup>1\*</sup>, Martin Feuerherd<sup>2\*</sup>, Ferdinand M. Guerth<sup>1</sup>, Madlen Oelsner<sup>1</sup>, Linda

8 Schellhammer<sup>3</sup>, Johanna Giglberger<sup>1,6</sup>, Lisa Pechtold<sup>6</sup>, Claudia Jerin<sup>1,6</sup>, Luisa Kugler<sup>6</sup>, Carolin

9 Mogler<sup>4</sup>, Bernhard Haller<sup>5</sup>, Anna Erb<sup>1</sup>, Barbara Wollenberg<sup>6</sup>, Christoph D. Spinner<sup>7</sup>, Thorsten

10 Buch<sup>3</sup>, Ulrike Protzer<sup>2</sup>, Carsten B. Schmidt-Weber<sup>1,§</sup>, Ulrich M. Zissler<sup>1,#</sup>, Adam M. Chaker<sup>1,6#</sup>

11

12 1) Center of Allergy & Environment (ZAUM), Technical University of Munich and Helmholtz  
13 Center Munich, German Research Center for Environmental Health, Member of the German  
14 Center for Lung Research (DZL), CPC-M, Munich, Germany

15 2) Institute of Virology, Technical University of Munich/Helmholtz Zentrum München,  
16 Munich, Germany; German Center of Infectiology Research (DZIF), Munich partner site,  
17 Munich, Germany

18 3) Institute of Laboratory Animal Science, University of Zurich, Zurich, Switzerland

19 4) Institute of Pathology, Technical University Munich, Munich, Germany

20 5) Institute of Medical Informatics, Statistics and Epidemiology, Medical School, Technical  
21 University of Munich

22 6) Department of Otorhinolaryngology and Head and Neck Surgery, Medical School, Technical  
23 University of Munich, Germany

24 7) Department of Internal Medicine II, University Hospital rechts der Isar, Medical School,  
25 Technical University of Munich, Munich, Germany

26 \*) These authors contributed equally

27 #) These senior authors contributed equally

28

29 §) Corresponding author:

30 Prof. Dr. Carsten B. Schmidt-Weber, Chair & Director

31 Center of Allergy & Environment (ZAUM)

32 Technical University and Helmholtz Center Munich

33 Biedersteiner Str. 29

34 80202 Munich, Germany

35 Email: [csweber@tum.de](mailto:csweber@tum.de)

36 **NOTE:** This preprint reports new research that has not been certified by peer review and should not be used to guide clinical practice.

37

38 **Conflict of interests:**

39 Dr. Jakwerth reports grants from Federal Ministry of Education and Research, grants from  
40 European Institute of Innovation & Technology (EIT), during the conduct of the study. Mr.  
41 Feuerherd reports personal fees from Helmholtz Zentrum München and Dr. Höhnle AG, outside  
42 the submitted work. Dr. Spinner reports grants, personal fees, non-financial support and other  
43 from AbbVie, grants, personal fees, non-financial support and other from Apeiron, personal  
44 fees from Formycon, grants, personal fees, non-financial support and other from Gilead  
45 Sciences, grants, personal fees and other from Eli Lilly, grants, personal fees, non-financial  
46 support and other from Janssen-Cilag, grants, personal fees, non-financial support and other  
47 from GSK/ViiV Healthcare, grants, personal fees, non-financial support and other from MSD,  
48 outside the submitted work. Prof. Dr. Buch reports personal fees from Virometix AG, other  
49 from Virometix AG, other from Trials24 GmbH, other from Clemedi AG, outside the submitted  
50 work. Prof. Dr. Protzer reports grants from the Federal Ministry of Education and Research, the  
51 German Center for Infection Research (DZIF), the German Research Foundation (DFG), the  
52 European Union via Horizon 2020 and the Bavarian Research Foundation during conduct of  
53 the study. She receives personal fees as an ad hoc scientific advisor from Abbvie, Arbutus,  
54 Gilead, GSK, Johnson & Johnson, Vaccitech. Prof. Dr. Schmidt-Weber reports grants from  
55 German Center for Lung Research (DZL), grants from Comprehensive Pulmonary Lung Center  
56 (CPC) Munich during the conduct of the study. Personal Fees from Allergopharma and  
57 Bencard, outside the submitted work. Dr. Zissler reports grants from Federal Ministry of  
58 Education and Research, during the conduct of the study. Dr. Chaker reports grants for clinical  
59 studies and research and other from Allergopharma, ALK Abello, AstraZeneca, Bencard /  
60 Allergen Therapeutics, ASIT Biotech, Lofarma, GSK, Novartis, LETI, Immunotek, Roche,  
61 Sanofi Genzyme, Zeller and from the European Institute of Technology (EIT); has received  
62 travel support from the European Academy of Allergy and Clinical Immunology (EAACI),  
63 DGAKI, all outside the submitted work. In addition, Drs. Jakwerth, Feuerherd, Protzer,

64 Schmidt-Weber, Zissler and Chaker are named as inventors on the patent application 'Novel  
65 approaches for treatment of SARS-CoV2-Infection in a patient'. Mr. Guerth, Ms. Oelsner, Dr.  
66 Schellhammer, Ms. Giglberger, Ms. Pechtold, Dr. Jerin, Ms. Kugler, Dr. Mogler, Dr. Haller,  
67 Ms. Erb, Prof. Dr. Wollenberg have nothing to disclose.

68

69 **Funding:** This study was supported by funding from the German Center of Lung Research  
70 (DZL), the Comprehensive Pneumology Center (CPC) Munich, the German Research  
71 Foundation (DFG; 398577603, TR22), and the Federal Ministry of Education and Research  
72 (ESCAPE; 01KI20169A).

73

74 **Author contributions:**

75 Study design A.M.C., C.S.W., U.P., C.A.J., M.F., U.M.Z., T.B.; collection of patient samples  
76 A.M.C., J.G., L.P., Cl.J., L.K.; conduction of experiment C.A.J., M.F., F.G., M.O., C.M., L.S.,  
77 J.G., L.K.; data collection C.A.J., M.F., F.G., M.O., U.M.Z., C.M., L.S., J.G., L.P., Cl.J., L.K.;  
78 data analysis C.A.J., M.F., F.G., A.E., U.M.Z., C.M., B.H., L.S.; data interpretation A.M.C.,  
79 C.S.W., U.P., C.A.J., M.F., U.M.Z., C.M., B.H., C.D.S., B.W., L.S., T.B.; literature search  
80 A.M.C., C.S.W., C.A.J., M.F., U.M.Z., A.E.; writing all authors.

81

82

83 **ABSTRACT (247/250 words)**

84 **Background:** SARS-CoV2 has evolved to enter the host via the ACE2 receptor which is part  
85 of the Kinin-kallirein pathway. This complex pathway is only poorly understood in context of  
86 immune regulation but critical to control infection. This study examines SARS-CoV2 infection  
87 and epithelial mechanisms of the kinin-kallikrein system at the kinin B<sub>2</sub> receptor level in SARS-  
88 CoV-2 infection that is of direct translational relevance.

89 **Methods:** From acute SARS-CoV-2-positive patients and -negative controls, transcriptomes of  
90 nasal brushings were analyzed. Primary airway epithelial cells (NHBEs) were infected with  
91 SARS-CoV-2 and treated with the approved B<sub>2</sub>R antagonist icatibant. SARS-CoV-2 RNA RT-  
92 qPCR, cytotoxicity assays, plaque assays and transcriptome analyses were performed. The  
93 treatment effect was further studied in a murine airway inflammation model *in vivo*.

94 **Results:** Here, we report a broad and strong upregulation of kallikreins and the kinin B<sub>2</sub> receptor  
95 (B<sub>2</sub>R) in the nasal mucosa of acutely symptomatic SARS-CoV-2-positive patients. A B<sub>2</sub>R  
96 antagonist impeded SARS-CoV-2 replication and spread in NHBEs, as determined in plaque  
97 assays on Vero E6 cells. B<sub>2</sub>R antagonism reduced the expression of SARS-CoV-2 entry  
98 receptor ACE2 *in vitro* and in a murine airway inflammation model *in vivo*. In addition, it  
99 suppressed gene expression broadly, particularly genes involved in G-protein-coupled-receptor  
100 signaling and ion transport.

101 **Conclusions:** In summary, this study provides evidence that treatment with B<sub>2</sub>R antagonists  
102 protects airway epithelial cells from SARS-CoV-2 by inhibiting its replication and spread,  
103 through the reduction of ACE2 levels and the interference with several cellular signaling  
104 processes. Future clinical studies need to shed light on the airway protection potential of  
105 approved B<sub>2</sub>R antagonists, like icatibant, in the treatment of early-stage COVID-19.

106

107 **Key words:** ACE2; COVID-19; kinin B<sub>2</sub>R antagonist; kinin-kallikrein system; SARS-CoV-2

108

109 **Abbreviations:**

|     |                             |                                                 |
|-----|-----------------------------|-------------------------------------------------|
| 110 | ACE2                        | angiotensin-converting enzyme 2                 |
| 111 | ant-B <sub>2</sub> R        | kinin B <sub>2</sub> receptor antagonist        |
| 112 | <i>BDKRB1</i>               | kinin B <sub>1</sub> receptor (gene name)       |
| 113 | <i>BDKRB2</i>               | kinin B <sub>2</sub> receptor (gene name)       |
| 114 | B <sub>1</sub> R            | kinin B <sub>1</sub> receptor                   |
| 115 | B <sub>2</sub> R            | kinin B <sub>2</sub> receptor                   |
| 116 | B <sub>2</sub> R antagonist | kinin B <sub>2</sub> receptor antagonist        |
| 117 | CAS                         | contact activation system                       |
| 118 | COVID-19                    | coronavirus disease of 2019                     |
| 119 | DABK                        | des-Arg <sup>9</sup> -bradykinin                |
| 120 | GPCR                        | G protein-coupled receptor                      |
| 121 | HC                          | hydrocortisone                                  |
| 122 | HMW-kininogen               | high-molecular-weight-kininogen                 |
| 123 | IC <sub>50</sub>            | half maximal inhibitory concentration           |
| 124 | KKS                         | kinin-kallikrein system                         |
| 125 | LDH                         | lactate dehydrogenase                           |
| 126 | NHBE                        | normal human bronchial epithelial cells         |
| 127 | RAS                         | renin-angiotensin system                        |
| 128 | SARS-CoV-2                  | Severe Acute Respiratory Syndrome Coronavirus-2 |
| 129 | TMPRSS                      | transmembrane serine protease                   |

130

131 **Word count: 3,476 / 3,500**

## 132 **1 INTRODUCTION**

133 SARS-CoV-2 vaccines have been approved worldwide since the end of 2020 and are starting  
134 to show their protective effects in public health.<sup>1,2</sup> Even with vaccines at hand, an important  
135 medical need for therapeutic approaches for COVID-19 remains: Parts of the population refrain  
136 from vaccination or are not eligible for it, immunocompromised individuals may not mount a  
137 sufficient immune response after vaccination and escape variants, such as the currently  
138 spreading SARS-CoV-2 variant Delta<sup>3</sup>, may breach the protection afforded by the vaccines.<sup>4-9</sup>  
139 Key factors for SARS-CoV-2 cell entry are two cell surface molecules, the angiotensin-  
140 converting enzyme 2 (ACE2) and the transmembrane serine protease (TMPRSS2).<sup>10</sup> TMPRSS2  
141 cleaves the coronaviral spike protein and primes it for cell fusion, while ACE2 enables the virus  
142 particle to enter the cell by binding of its spike protein.<sup>11,12</sup> The latter acts as central component  
143 in its function as terminal carboxypeptidase in the counter-regulatory axis of the renin-  
144 angiotensin system (RAS) and the contact activation system (CAS),<sup>10,13</sup> which initiates blood  
145 coagulation and can additionally activate the kinin-kallikrein system (KKS).<sup>14</sup> In its role in the  
146 RAS, ACE2 has anti-vasoconstrictive and anti-inflammatory effects by hydrolyzing the  
147 vasoconstrictive and tissue-damaging angiotensin II, which contributes to airway remodeling  
148 and fibrosis,<sup>15,16</sup> to angiotensin (1-7).<sup>17</sup> In its role in the KKS, ACE2 further hydrolyzes  
149 vasoactive peptides such as des-Arg9-bradykinin (DABK), which activates the inflammatory  
150 axis of the KKS.<sup>18,19</sup> While DABK is the ligand of the inducible kinin B<sub>1</sub> receptor (*BDKRB1*;  
151 B<sub>1</sub> receptor),<sup>20</sup> bradykinin, the end product of the KKS cascade, binds to the constitutively  
152 expressed kinin B<sub>2</sub> receptor (*BDKRB2*; B<sub>2</sub> receptor; B<sub>2</sub>R) and activates it.<sup>21</sup> Bradykinin  
153 mediates its pro-inflammatory effects via the B<sub>2</sub> receptor, by eliciting a variety of responses,  
154 including vasodilation and edema, via the G protein-triggered phosphatidylinositol-calcium  
155 second messenger system.<sup>22-26</sup>

156 The fact that SARS-CoV-2 utilizes ACE2 to enter airway cells along with the fact that ACE2  
157 is a multifunctional enzyme that counter-regulates the ACE-driven mechanisms of the RAS and  
158 balances the KKS, may therefore explain the serious course of COVID-19, not only in the lungs  
159 but systemically.<sup>27,28</sup>

160 Recent publications suggest that the KKS could play a role in COVID-19. KKS comes into play  
161 particularly in connection with the high prevalence of thromboembolic events in seriously ill  
162 COVID-19 patients.<sup>7,18,20,29,30</sup> A recent study on a cohort of 66 COVID-19 patients admitted to  
163 the intensive care unit showed that the KKS was strongly activated, which was reflected in the  
164 consumption of factor XII, pre-kallikrein and high-molecular-weight kininogen (HMW-  
165 kininogen).<sup>29</sup> It has further been hypothesized that kinin-dependent “local lung angioedema”  
166 involving the kinin B<sub>1</sub> and B<sub>2</sub> receptors is an important characteristic of COVID-19.<sup>31-34</sup>

167 This study examines the potential of interfering with the KKS at the kinin receptor level in  
168 SARS-CoV-2 infection with translational relevance. Based on a broad and strong upregulation  
169 of kallikreins and of the kinin B<sub>2</sub> receptor in the nasal mucosa of acutely SARS-CoV-2-positive  
170 patients, we hypothesized that the B<sub>2</sub> receptor antagonism using icatibant, an approved  
171 compound for the treatment of hereditary angioedema,<sup>35</sup> had an early protective effect against  
172 SARS-CoV-2-mediated epithelial damage through disruption of ACE2-mediated virus entry.

173

## 174 **2 MATERIALS AND METHODS**

### 175 **2.1 Patients and nasal brushings**

176 The nasal brushings were performed as a part of a larger health professional observational  
177 cohort study, which was approved by the ethics commission of the Technical University of  
178 Munich (AZ 175/20s). Nasal brushings were subjected to whole-genome microarray  
179 transcriptome analysis (see Supp.Info.). All patients gave written, informed consent prior to  
180 participation (see Table 1).

181

### 182 **2.2 *In vivo* mouse study**

183 Mice received murine IL-12Fc (1 µg of protein in 50 µL PBS) or PBS control intranasally.<sup>36</sup>  
184 Intranasal application was performed under isoflurane anesthesia in two steps of 25 µL per  
185 nostril. 48 hours later, the mice received a single subcutaneous injection of icatibant (2 nmol  
186 per 10 g body weight; HOE-140 (icatibant), H157, SLBX4410, Sigma) or PBS control. The  
187 experiment was terminated by CO<sub>2</sub> asphyxiation 6 hours or 24 hours after the injection of  
188 icatibant. The experiment was carried out twice. Organs were snap frozen for protein extraction.  
189 Mice enrolled in the experiment were 6-8 weeks old, from either C57BL/6J, BALB/c or C3H  
190 HeN strains. Both sexes were included for each strain and means of each mouse type (strain /  
191 sex) are depicted as single values in Fig.2A: circle: female; triangle: male. Black: C57BL/6,  
192 mid grey: C3H HeN, light grey: BALB/c strain. Experiments were performed and analyzed in  
193 a randomized and blinded fashion. Animals were obtained from Janvier Labs (Le Genest-Saint-  
194 Isle, France) and housed 5 per cage and sex in individually ventilated cages at Laboratory  
195 Animal Service Center of the University of Zurich in Schlieren (Schlieren, Zurich,  
196 Switzerland). The animal vivarium was a specific-pathogen-free (SPF) holding room, that was  
197 temperature- and humidity-controlled (21 ± 3 °C, 50 ± 10%), with a 12h light/dark cycle. All  
198 animals had ad libitum access to the same food and water throughout the entire study. All  
199 procedures described in this study had previously been approved by the Cantonal Veterinarian's



200 Office of Zurich, Switzerland (License ZH096/20), and every effort was made to minimize the  
201 number of animals used and their suffering. Experiments were pre-registered at  
202 [www.animalstudyregistry.org](http://www.animalstudyregistry.org) (study title "Effect of drug on ACE2 levels in mice";  
203 doi=10.17590/asr.0000225).  
204 Detailed methods are provided in the online supporting information.  
205

## 206 3 RESULTS

### 207 3.1 B<sub>2</sub> receptor antagonist inhibits replication and spread of SARS-CoV-2

208 The enzyme ACE2 is the central viral entry receptor for the novel SARS-CoV-2 coronavirus  
209 on human epithelial cells of the respiratory tract.<sup>10</sup> Recent studies showed that this receptor and  
210 its co-receptors are not only expressed in the lower respiratory tract, and thus on the alveolar  
211 epithelial cells type I and II, but are also present in the upper respiratory tract, but are  
212 predominantly expressed in the nasal mucosa.<sup>37</sup>

213 To investigate the local effect of the acute SARS-CoV-2 infection on the nasal epithelium, we  
214 analyzed the transcriptome of nasal brushings from symptomatic patients who tested acutely  
215 positive for SARS-CoV-2 and of SARS-CoV-2-negative patients. In a transcriptome analysis,  
216 the most strongly induced genes encoding secreted factors included many members of the  
217 kallikrein family (Fig.1A, Table S1). In particular, the kallikreins *KLK5*, *KLK9* and *KLK12*  
218 were significantly upregulated in acute SARS-CoV-2-positive patients compared to SARS-  
219 CoV-2-negative patients (Fig.1B, Table S2). A subsequent analysis focusing on central factors  
220 of the KKS revealed that in addition, the kinin receptor B<sub>2</sub> (*BDKRB2*; B<sub>2</sub>R) was also  
221 significantly increased (Fig.1C, Table S3). This first finding, together with our hypothesis that  
222 ACE2, as a central component, is counter-regulated by intervention in the KKS, prompted us  
223 to investigate selective kinin B<sub>2</sub> receptor antagonism in connection with SARS-CoV-2  
224 infection. To circumvent the limitations of cell lines like Vero E6, A549 or Calu-3 cells that are  
225 intrinsically impaired to form an interferon response upon viral infection,<sup>38</sup> we next infected  
226 primary bronchial epithelial (NHBE) cells with SARS-CoV-2.

227 To examine the effects of SARS-CoV-2 infection and B<sub>2</sub>R antagonist treatment on the  
228 microscopic integrity of the airway epithelium, 3D-air-liquid interphase organoid cultures were  
229 differentiated from primary NHBEs (see Supp.Info). After complete differentiation, the  
230 epithelia were pre-treated from the basal (medium) side with the approved B<sub>2</sub>R antagonist  
231 icatibant, and subsequently infected with SARS-CoV-2 from the apical (air) side. The cultures

232 pre-treated with the B<sub>2</sub>R antagonist showed less virus-induced balloon-like structures compared  
233 to untreated cultures. The epithelial layers remained qualitatively more intact, which indicated  
234 a protective effect of the B<sub>2</sub>R antagonist for the bronchial epithelium (Fig.1D). This finding  
235 was further strengthened by cytotoxicity assays: The B<sub>2</sub>R antagonist had no toxic effects on  
236 NHBEs even at high doses determined by lactate dehydrogenase (LDH) release, but rather  
237 exhibited a cell-protecting effect in uninfected cells (Fig.1E) as well as during SARS-CoV-2  
238 infection (Fig.1F). Next, the supernatants of pre-treated, infected primary NHBEs were  
239 collected, titrated onto fresh Vero E6 cell cultures and plaque assays were performed.  
240 Strikingly, we found that *in vitro* treatment of NHBEs with the B<sub>2</sub>R antagonist prior to infection  
241 reduced the number of plaque forming units (PFU) in a plaque assay by 87% (Fig.1G). In  
242 addition, the levels of total SARS-CoV-2 RNA in cells that had been pretreated with the B<sub>2</sub>R  
243 antagonist decreased by 52% compared to untreated infected NHBEs (Fig.1H). With regard to  
244 the virus entry process, ACE2 was reduced by pretreatment with the B<sub>2</sub>R antagonist on the  
245 mRNA level (Fig. 1I) and on the protein level (Fig. 1J). The membrane-standing protease  
246 TMPRSS2 cleaves the spike protein for SARS-CoV-2 and primes it therefore for optimized  
247 binding to its entry receptor ACE2. In contrast to ACE2, the *TMPRSS2* transcript levels were  
248 significantly increased in infected compared to uninfected NHBEs but were not affected by  
249 B<sub>2</sub>R antagonist pre-treatment (Fig.S2A). Further experiments on the effect of the B<sub>2</sub>R  
250 antagonist on the SARS-CoV-2 infection of NHBE showed that pre-treatment with the B<sub>2</sub>R  
251 antagonist significantly reduced infection-mediated cytotoxicity measured by LDH release  
252 (Fig.1F).

253

### 254 **3.2 Repetitive treatment with B<sub>2</sub>R antagonist inhibits SARS-CoV-2 replication and spread** 255 **post-infection**

256 The finding that B<sub>2</sub>R antagonism leads to a downregulation of ACE2 protein levels in lung  
257 epithelial cells was confirmed *in vivo* in a murine airway inflammation model. 24 sex-matched

258 mice from three different strains per group were treated in two blocks intranasally with murine  
259 IL-12Fc to mimic virus-induced airway inflammation via activation of the IL-12 / IFN- $\gamma$  axis.<sup>36</sup>  
260 After 48 hours, mice were injected subcutaneously (s.c.) with the B<sub>2</sub>R antagonist and the  
261 experiment was terminated six hours or 24 hours later. IL-12Fc-pretreated mice, which were  
262 then further treated with the B<sub>2</sub>R antagonist on day 2, had significantly reduced ACE2 protein  
263 levels in the lungs after six hours compared to control mice, which were only treated with PBS  
264 on day 2 (Fig.2A). This effect decreased after 24 hours.

265 Anticipating treatment of SARS-CoV-2 infected patients with the B<sub>2</sub>R antagonist icanitabant,  
266 NHBEs were first infected with SARS-CoV-2 and then treated with the B<sub>2</sub>R antagonist six  
267 hours after infection. Confirming the results of the pre-treatment, post-infection treatment with  
268 the B<sub>2</sub>R antagonist also attenuated the cytopathic effect of SARS-CoV-2 (Fig.2B) and reduced  
269 the number of PFU in a plaque assay on Vero E6 cells by 84% (Fig.2C).

270 We also aimed to reflect pharmacokinetics<sup>39</sup> during treatment of early infection by treating  
271 NHBEs post-infection every 24 hours with the B<sub>2</sub>R antagonist repeatedly for a period of 96  
272 hours, reflecting the drug administration of this particular substance in real life. In cells treated  
273 post-infection with 100 nM icanitabant for 48 hours, the total viral RNA (Fig.2D-F IC<sub>50</sub>(total  
274 RNA 48h)=92.93; IC<sub>50</sub>(total RNA 72h)=91.56) and also the genomic viral RNA (Fig.2G-I;  
275 IC<sub>50</sub>(total RNA 48h)=17.01; IC<sub>50</sub>(total RNA 72h)=7.412) were significantly reduced by 49%  
276 and 42% on average, respectively. Treatment with 1000 nM icanitabant for 48 hours led to a  
277 reduction of the total SARS-CoV-2 RNA (Fig.2D-F) and also of the genomic SARS-CoV-2  
278 RNA (Fig.2G-I) by 69% and 56% on average, respectively. The genomic viral RNA was  
279 detected using RT-qPCR against the sequence of the SARS-CoV-2 RNA-dependent RNA  
280 polymerase (*RdRP*), which is only found in virions as well as during the viral replication. On  
281 the other hand, total viral RNA was detected with qPCR targeting a sequence of the SARS-  
282 CoV-2 *N* gene that is present in the viral genome and also in every SARS-CoV-2 protein-  
283 encoding transcript. The reduction in total SARS-CoV-2 RNA and genomic viral RNA during

284 treatment with the B<sub>2</sub>R antagonist was comparable at the indicated concentrations and time  
285 points (Fig.2D-I).

286

### 287 **3.3 B<sub>2</sub> receptor antagonism broadly silences gene expression in bronchial epithelial cells** 288 **while maintaining cell-intrinsic antiviral response**

289 Severe cases of COVID-19 develop cytokine storms<sup>40-42</sup> characterized by excessive systemic  
290 release of multiple cytokines including IP-10 (*CXCL10*), IL-6, IL-8 (*CXCL8*), and IL-10.<sup>43-46</sup>

291 These cases are currently treated with immunomodulating drugs, such as corticosteroids or  
292 biologics, like tocilizumab<sup>47</sup>, though these treatments may interfere with or alter the antiviral

293 immune response. We therefore compared the effect of the B<sub>2</sub>R antagonist on gene expression  
294 of the bronchial epithelium in the light of SARS-CoV-2 infection with the effect of

295 hydrocortisone. While the B<sub>2</sub>R antagonist mainly suppressed epithelial gene expression during  
296 infection, the effects of hydrocortisone on gene induction and gene repression were equal

297 (Fig.3A, Tables S4-5). This finding matches previous reports.<sup>48</sup> Therefore, conditions were

298 compared in respect to the antiviral epithelial response. In fact, differentially expressed genes  
299 (DEGs) induced by SARS-CoV-2 infection in NHBEs encompassed type-I and -III interferons

300 as well as IFN-inducible and antiviral *APOBEC* genes (Fig.S1E, Table S6). In particular,

301 SARS-CoV-2 infection induced the antiviral cytidine deaminases APOBEC3A and B, which  
302 we previously described to be induced by type-I interferons in the treatment of hepatitis-B virus

303 infection.<sup>49</sup> On the other hand, *APOBEC3C* mRNA levels were decreased in SARS-CoV-2-

304 infected NHBE, which could indicate a novel evasion mechanism.<sup>50</sup> Neither the B<sub>2</sub>R antagonist

305 nor hydrocortisone inhibited the expression of genes with cell-intrinsic antiviral effects and  
306 even increased the antiviral factor *APOBEC3A* at the mRNA level (Fig.3B, Table S7).<sup>51</sup>

307 Our gene expression analysis data show that SARS-CoV-2 infection also induces the expression  
308 of acute-phase proteins, such as TNF- $\alpha$  and IL-8 (*CXCL8*),<sup>52,53</sup> as well as IL-17C, MIP-

309 3 $\alpha$  (*CCL20*), IL-36 $\gamma$ <sup>54,55</sup> and the chemokines CXCL1, -2, -3, -8, -17, CCL2, -3, -5<sup>54</sup> in primary

310 lung epithelial cells (Fig.3C, Table S8). The induction of these factors most likely contributes  
311 to the recruitment and activation of relevant immune cells to the site of infection. Our findings  
312 are supported by previous studies of aberrant macrophage and T cell responses underlying  
313 immunopathogenesis in bronchoalveolar lavage fluid from COVID-19 patients.<sup>56</sup> In addition,  
314 the gene expression of acute-phase proteins was not significantly affected in airway epithelial  
315 cells by the B<sub>2</sub>R antagonist or hydrocortisone treatment (Fig.3C, Table S8). Neither drug  
316 interfered with canonical cellular antiviral – and reaction-triggering response mechanisms,  
317 showing great potential for treatment options of COVID-19 while maintaining the host’s  
318 antiviral immune response.

319 In addition, we found that SARS-CoV-2 infection increases the expression of three known and  
320 postulated entry (co-)receptors: 1) the transmembrane serine protease TMPRSS11A (Fig.S1C,  
321 Tables S6,9-13), which was described to prime the MERS coronavirus spike protein<sup>57</sup>, 2) the  
322 transmembrane serine protease TMPRSS11D, which was shown to activate SARS-CoV-2 spike  
323 protein<sup>58</sup> and 3) the pathogen-associated molecular pattern-binding C-type lectin receptor DC-  
324 SIGN (*CD209*), which was described to serve as entry receptor for SARS-CoV<sup>59</sup> and has been  
325 suggested to act as a receptor also for SARS-CoV-2. The induction of these additional entry  
326 receptor candidates triggered by SARS-CoV-2 infection may potentiate the viral spread in the  
327 bronchial epithelium and thus represent a pathogenetic approach that needs further research.

328 Overall, treatment with the B<sub>2</sub>R antagonist and hydrocortisone had no significant effects on the  
329 expression of these candidate viral entry receptors (Fig.3D, Table S14). On the other hand,  
330 hydrocortisone enhanced the expression of TMPRSS proteases (Fig.3D). In particular, when  
331 focusing on the known SARS-CoV-2 entry receptors, hydrocortisone treatment of uninfected  
332 cells was already sufficient to induce an increase in *TMPRSS2* gene expression (Fig.3E). SARS-  
333 CoV-2 infection per se also increased *TMPRSS2* expression, and pre-treatment of SARS-CoV-  
334 2-infected NHBEs with hydrocortisone further potentiated this effect. On the other hand, *ACE2*  
335 expression showed only a slight upward trend after hydrocortisone pretreatment (Fig.S2B).

336 Finally, the hydrocortisone pre-treatment of SARS-CoV-2-infected NHBEs had no inhibitory  
337 effect on the release of infectious particles 24 hours after infection (Fig.3F), which was  
338 expected since the treatment of COVID-19 patients with corticosteroids has an  
339 immunomodulatory rationale.

340

### 341 **3.4 B<sub>2</sub> receptor antagonist counter-balances virus-induced gene expression, particularly** 342 **genes involved in G protein-coupled receptor (GPCR) signaling and ion transport**

343 With regard to the genes that are attenuated at the mRNA level by B<sub>2</sub>R antagonism, the DEGs  
344 were analyzed in a network analysis using the database string to identify enriched cellular  
345 processes. B<sub>2</sub>R antagonism reduced the expression levels of 343 membrane-bound receptors  
346 significantly in treated versus untreated SARS-CoV-2-infected NHBEs (Table S15). Two  
347 particular cellular processes affected by pre-treatment with the B<sub>2</sub>R antagonist were identified,  
348 namely G protein-coupled receptor signaling (GO:0007186; Fig.4A, S2C, Tables S4,S17-18)  
349 and ion transport (GO:0006811; Fig.4B, Tables S4,17-18). DEGs involved in both processes  
350 were significantly downregulated in treated versus untreated SARS-CoV-2-infected NHBEs  
351 (Tables 16-18). Notably, all 35 cell surface receptors induced by SARS-CoV-2 infection were  
352 downregulated in cells that were treated with the B<sub>2</sub>R antagonist (Fig.4C,D, Tables S19-20).

353

354

355 **4 DISCUSSION**

356 In this study, we provide evidence for the effect of interference with the KKS at the kinin B<sub>2</sub>  
357 receptor level as a means of protecting the airway epithelium from SARS-CoV-2 infection,  
358 while maintaining canonical cell-intrinsic antiviral response.

359 We initially hypothesized that through KKS interference, either feedback mechanisms or  
360 modulated signal transduction target the virus entry receptor ACE2 and thus interfere with the  
361 spread of SARS-CoV-2. To this end, the approved B<sub>2</sub>R antagonist icatibant was used in this  
362 study. Here, we demonstrate that treatment with a B<sub>2</sub>R antagonist inhibits the replication and  
363 spread of SARS-CoV-2 in primary airway epithelial cells, which was determined by a decrease  
364 in total and genomic SARS-CoV-2 RNA, resulting in less infectious particles in plaque assays,  
365 both when applied pre- and post-infection. While a low concentration of 1 nM B<sub>2</sub>R antagonist  
366 was sufficient to reduce viral RNA in primary bronchial epithelial cells when cells were treated  
367 pre-infection, 100 nM B<sub>2</sub>R antagonist was required to this effect, when cells were treated post-  
368 infection. In addition, the significant reduction in virus load as determined by PCR tapered off  
369 after 96 hours. On the one hand, *in vitro* infections are performed with excess amounts of virus  
370 particles. On the other hand, the fact that, due to its constitution as a peptide analog, the B<sub>2</sub>R  
371 antagonist icatibant used in this study has a short half-life in the human body<sup>39</sup> but also  
372 pharmacological tolerance to interference at receptor level may explain why the effect reached  
373 significance after six hours but did not persist. Therefore, a higher dose of the B<sub>2</sub>R antagonist  
374 may be required at even shorter repetitive dosing intervals to inhibit virus replication in the long  
375 term. Therapeutic application in future dose finding studies should therefore focus on early  
376 intervention with at least two doses daily<sup>60</sup> and on either optimized pharmacokinetics or  
377 increased high local tissue concentrations, e.g. through topical application.

378

379 Two potential mechanisms of action for suppressing SARS-CoV-2 replication and spread in  
380 airway epithelium are revealed by the current study:



381 1) Treatment with the B<sub>2</sub>R antagonist led to a downregulation of the viral entry receptor ACE2,  
382 *in vitro* in primary airway epithelial cells and *in vivo* in a murine airway inflammation model.  
383 Since the decrease of genomic SARS-CoV-2 RNA and total SARS-CoV-2 RNA was  
384 comparable, we conclude that the B<sub>2</sub>R antagonist icatibant does probably not affect the viral  
385 transcription machinery but inhibits the infection rather on the levels of entry, protein  
386 synthesis/processing and assembly, maturation or budding.

387 In comparison, the corticosteroid hydrocortisone even upregulated TMPRSS2 in infected  
388 airway epithelial cells. It is noteworthy that hydrocortisone did not change the release of  
389 infectious particles from infected airway epithelial cells into the supernatant. Although  
390 TMPRSS2 expression was even enhanced by hydrocortisone, our data implicate that this effect  
391 on TMPRSS2 alone is insufficient to increase susceptibility for SARS-CoV-2 infection.

392 2) Treatment with the B<sub>2</sub>R antagonist had a broad suppressive effect on gene expression of  
393 multiple cell signaling molecules, in particular on membrane-standing factors involved in  
394 GPCR signaling and ion transport.

395 It has recently been published that SARS-CoV-2 may use cellular GPCR signaling pathways,  
396 thereby modulate epithelial transport mechanisms involved in ion transport and thereby cause  
397 a local ion imbalance in the airways.<sup>61</sup> In addition, an extensive recent study described that  
398 intracellular SARS-CoV-2 protein interactions include factors involved in intracellular  
399 trafficking and transport, particularly ion transport and solute carrier transport.<sup>62</sup> In fact, the  
400 SARS-CoV-2 infection led to a differential regulation of the gene expression of 12 potassium  
401 channel (5 upregulated / 7 downregulated), 1 sodium channel (down), but in particular of 55  
402 members of the solute carrier family (24 downregulated / 31 upregulated) in primary airway  
403 epithelial cells. On the other hand, B<sub>2</sub>R antagonist treatment of SARS-CoV-2-infected NHBE  
404 resulted in a downregulation of 20 potassium channel genes and 6 sodium channel genes, as  
405 well as a downregulation of 29 members of the solute carrier family.

406 We therefore conclude that B<sub>2</sub>R antagonism not only impedes the viral entry process by  
407 reducing ACE2, as we had hypothesized, but also counter-regulates cellular processes that  
408 include GPCR signaling and transmembrane ion transport, which SARS-CoV-2 may utilize for  
409 efficient replication and viral spread.

410  
411 In conclusion, the results of this study suggest that B<sub>2</sub> receptor-antagonism protects airway  
412 epithelial cells from SARS-CoV-2 spread by reducing ACE2 levels and by interfering with  
413 several cellular signaling processes. Further research is needed to elucidate more details about  
414 molecular mechanisms involved in the viral life cycle that kinin B<sub>2</sub> receptor antagonism targets  
415 and underlie its effects against SARS-CoV-2 infection. Based on these data, we speculate that  
416 the protective effects of B<sub>2</sub>R antagonism could potentially prevent the early stages of COVID-  
417 19 from progressing into severe acute respiratory distress syndrome (ARDS) with structural  
418 airway damage and fibrotic changes. We therefore propose that the safe approved B<sub>2</sub>R  
419 antagonist icatibant be tested in clinical trials for two important aspects: 1) Treatment of early  
420 COVID-19 disease targeting the replication and spread of the virus. 2) Optimized dosage  
421 regimen to reflect pharmacokinetics and possible pharmacological tolerance at the receptor  
422 level. Future controlled clinical trials must provide substantial evidence for optimal dosage  
423 regimen, application, efficacy, and safety to investigate, whether KKS interference at the kinin  
424 B<sub>2</sub> receptor level can prevent the escalation of COVID-19 to ARDS and long-term lung damage.  
425

## 426 REFERENCES

- 427 1. Polack FP, Thomas SJ, Kitchin N, et al. Safety and Efficacy of the BNT162b2 mRNA  
428 Covid-19 Vaccine. *N Engl J Med.* 2020;383(27):2603-2615.
- 429 2. Zhang JJ, Dong X, Cao YY, et al. Clinical characteristics of 140 patients infected with  
430 SARS-CoV-2 in Wuhan, China. *Allergy.* 2020;75(7):1730-1741.
- 431 3. Planas D, Veyer D, Baidaliuk A, et al. Reduced sensitivity of SARS-CoV-2 variant  
432 Delta to antibody neutralization. *Nature.* 2021.
- 433 4. Hacisuleyman E, Hale C, Saito Y, et al. Vaccine Breakthrough Infections with SARS-  
434 CoV-2 Variants. *N Engl J Med.* 2021.
- 435 5. Schmidt F, Weisblum Y, Muecksch F, et al. Measuring SARS-CoV-2 neutralizing  
436 antibody activity using pseudotyped and chimeric viruses. *J Exp Med.* 2020;217(11).
- 437 6. Sokolowska M, Lukasik ZM, Agache I, et al. Immunology of COVID-19: Mechanisms,  
438 clinical outcome, diagnostics, and perspectives-A report of the European Academy of  
439 Allergy and Clinical Immunology (EAACI). *Allergy.* 2020;75(10):2445-2476.
- 440 7. Gao YD, Ding M, Dong X, et al. Risk factors for severe and critically ill COVID-19  
441 patients: A review. *Allergy.* 2021;76(2):428-455.
- 442 8. Bousquet J, Jutel M, Akdis CA, et al. ARIA-EAACI statement on asthma and COVID-  
443 19 (June 2, 2020). *Allergy.* 2021;76(3):689-697.
- 444 9. Du H, Dong X, Zhang JJ, et al. Clinical characteristics of 182 pediatric COVID-19  
445 patients with different severities and allergic status. *Allergy.* 2021;76(2):510-532.
- 446 10. Hoffmann M, Kleine-Weber H, Schroeder S, et al. SARS-CoV-2 Cell Entry Depends  
447 on ACE2 and TMPRSS2 and Is Blocked by a Clinically Proven Protease Inhibitor. *Cell.*  
448 2020;181(2):271-280 e278.
- 449 11. Matsuyama S, Nagata N, Shirato K, Kawase M, Takeda M, Taguchi F. Efficient  
450 activation of the severe acute respiratory syndrome coronavirus spike protein by the  
451 transmembrane protease TMPRSS2. *J Virol.* 2010;84(24):12658-12664.
- 452 12. Li W, Moore MJ, Vasileva N, et al. Angiotensin-converting enzyme 2 is a functional  
453 receptor for the SARS coronavirus. *Nature.* 2003;426(6965):450-454.
- 454 13. Diamond B. The renin-angiotensin system: An integrated view of lung disease and  
455 coagulopathy in COVID-19 and therapeutic implications. *J Exp Med.* 2020;217(8).
- 456 14. Schmaier AH. The contact activation and kallikrein/kinin systems: pathophysiologic  
457 and physiologic activities. *J Thromb Haemost.* 2016;14(1):28-39.
- 458 15. Stukalov A, Girault V, Grass V, et al. Multilevel proteomics reveals host perturbations  
459 by SARS-CoV-2 and SARS-CoV. *Nature.* 2021.
- 460 16. Imai Y, Kuba K, Rao S, et al. Angiotensin-converting enzyme 2 protects from severe  
461 acute lung failure. *Nature.* 2005;436(7047):112-116.
- 462 17. Santos RAS, Sampaio WO, Alzamora AC, et al. The ACE2/Angiotensin-(1-7)/MAS  
463 Axis of the Renin-Angiotensin System: Focus on Angiotensin-(1-7). *Physiol Rev.*  
464 2018;98(1):505-553.
- 465 18. Meini S, Zanichelli A, Sbrojavacca R, et al. Understanding the Pathophysiology of  
466 COVID-19: Could the Contact System Be the Key? *Front Immunol.* 2020;11:2014.
- 467 19. Vickers C, Hales P, Kaushik V, et al. Hydrolysis of biological peptides by human  
468 angiotensin-converting enzyme-related carboxypeptidase. *J Biol Chem.*  
469 2002;277(17):14838-14843.
- 470 20. van de Veerdonk FL, Netea MG, van Deuren M, et al. Kallikrein-kinin blockade in  
471 patients with COVID-19 to prevent acute respiratory distress syndrome. *Elife.* 2020;9.
- 472 21. Shen B, Harrison-Bernard LM, Fuller AJ, Vanderpool V, Saifudeen Z, El-Dahr SS. The  
473 Bradykinin B2 receptor gene is a target of angiotensin II type 1 receptor signaling. *J Am*  
474 *Soc Nephrol.* 2007;18(4):1140-1149.

- 475 22. Burch RM, Axelrod J. Dissociation of bradykinin-induced prostaglandin formation  
476 from phosphatidylinositol turnover in Swiss 3T3 fibroblasts: evidence for G protein  
477 regulation of phospholipase A2. *Proc Natl Acad Sci U S A.* 1987;84(18):6374-6378.
- 478 23. Slivka SR, Insel PA. Phorbol ester and neomycin dissociate bradykinin receptor-  
479 mediated arachidonic acid release and polyphosphoinositide hydrolysis in Madin-Darby  
480 canine kidney cells. Evidence that bradykinin mediates noninterdependent activation of  
481 phospholipases A2 and C. *J Biol Chem.* 1988;263(29):14640-14647.
- 482 24. Yu HS, Lin TH, Tang CH. Involvement of intercellular adhesion molecule-1 up-  
483 regulation in bradykinin promotes cell motility in human prostate cancers. *Int J Mol Sci.*  
484 2013;14(7):13329-13345.
- 485 25. Chen S, Zhang L, Xu R, et al. BDKRB2 +9/-9 bp polymorphisms influence BDKRB2  
486 expression levels and NO production in knee osteoarthritis. *Exp Biol Med (Maywood).*  
487 2017;242(4):422-428.
- 488 26. Souza PPC, Lundberg P, Lundgren I, Magalhaes FAC, Costa-Neto CM, Lerner UH.  
489 Activation of Toll-like receptor 2 induces B1 and B2 kinin receptors in human gingival  
490 fibroblasts and in mouse gingiva. *Sci Rep.* 2019;9(1):2973.
- 491 27. Imai Y, Kuba K, Penninger JM. The discovery of angiotensin-converting enzyme 2 and  
492 its role in acute lung injury in mice. *Exp Physiol.* 2008;93(5):543-548.
- 493 28. Jia H. Pulmonary Angiotensin-Converting Enzyme 2 (ACE2) and Inflammatory Lung  
494 Disease. *Shock.* 2016;46(3):239-248.
- 495 29. Lipcsey M, Persson B, Eriksson O, et al. The Outcome of Critically Ill COVID-19  
496 Patients Is Linked to Thromboinflammation Dominated by the Kallikrein/Kinin System.  
497 *Front Immunol.* 2021;12:627579.
- 498 30. Mansour E, Palma AC, Ulaf RG, et al. Safety and Outcomes Associated with the  
499 Pharmacological Inhibition of the Kinin-Kallikrein System in Severe COVID-19.  
500 *Viruses.* 2021;13(2).
- 501 31. de Maat S, de Mast Q, Danser AHJ, van de Veerdonk FL, Maas C. Impaired Breakdown  
502 of Bradykinin and Its Metabolites as a Possible Cause for Pulmonary Edema in COVID-  
503 19 Infection. *Semin Thromb Hemost.* 2020;46(7):835-837.
- 504 32. Garvin MR, Alvarez C, Miller JI, et al. A mechanistic model and therapeutic  
505 interventions for COVID-19 involving a RAS-mediated bradykinin storm. *Elife.*  
506 2020;9.
- 507 33. Kaplan AP, Ghebrehiwet B. Pathways for bradykinin formation and interrelationship  
508 with complement as a cause of edematous lung in COVID-19 patients. *J Allergy Clin*  
509 *Immunol.* 2021;147(2):507-509.
- 510 34. Roche JA, Roche R. A hypothesized role for dysregulated bradykinin signaling in  
511 COVID-19 respiratory complications. *FASEB J.* 2020;34(6):7265-7269.
- 512 35. Bas M, Bier H, Greve J, Kojda G, Hoffmann TK. Novel pharmacotherapy of acute  
513 hereditary angioedema with bradykinin B2-receptor antagonist icatibant. *Allergy.*  
514 2006;61(12):1490-1492.
- 515 36. Eisenring M, vom Berg J, Kristiansen G, Saller E, Becher B. IL-12 initiates tumor  
516 rejection via lymphoid tissue-inducer cells bearing the natural cytotoxicity receptor  
517 NKp46. *Nat Immunol.* 2010;11(11):1030-1038.
- 518 37. Sungnak W, Huang N, Becavin C, et al. SARS-CoV-2 entry factors are highly expressed  
519 in nasal epithelial cells together with innate immune genes. *Nat Med.* 2020;26(5):681-  
520 687.
- 521 38. Yoshikawa T, Hill TE, Yoshikawa N, et al. Dynamic innate immune responses of  
522 human bronchial epithelial cells to severe acute respiratory syndrome-associated  
523 coronavirus infection. *PLoS One.* 2010;5(1):e8729.
- 524 39. Leach JK, Spencer K, Mascelli M, McCauley TG. Pharmacokinetics of single and  
525 repeat doses of icatibant. *Clin Pharmacol Drug Dev.* 2015;4(2):105-111.

- 526 40. Huang C, Wang Y, Li X, et al. Clinical features of patients infected with 2019 novel  
527 coronavirus in Wuhan, China. *Lancet*. 2020;395(10223):497-506.
- 528 41. Zhou F, Yu T, Du R, et al. Clinical course and risk factors for mortality of adult  
529 inpatients with COVID-19 in Wuhan, China: a retrospective cohort study. *Lancet*.  
530 2020;395(10229):1054-1062.
- 531 42. Burian E, Jungmann F, Kaissis GA, et al. Intensive Care Risk Estimation in COVID-19  
532 Pneumonia Based on Clinical and Imaging Parameters: Experiences from the Munich  
533 Cohort. *J Clin Med*. 2020;9(5).
- 534 43. Zheng HY, Zhang M, Yang CX, et al. Elevated exhaustion levels and reduced functional  
535 diversity of T cells in peripheral blood may predict severe progression in COVID-19  
536 patients. *Cell Mol Immunol*. 2020.
- 537 44. Laing AG, Lorenc A, Del Molino Del Barrio I, et al. A dynamic COVID-19 immune  
538 signature includes associations with poor prognosis. *Nat Med*. 2020;26(10):1623-1635.
- 539 45. Buszko M, Nita-Lazar A, Park JH, et al. Lessons learned: new insights on the role of  
540 cytokines in COVID-19. *Nat Immunol*. 2021;22(4):404-411.
- 541 46. Azkur AK, Akdis M, Azkur D, et al. Immune response to SARS-CoV-2 and  
542 mechanisms of immunopathological changes in COVID-19. *Allergy*. 2020;75(7):1564-  
543 1581.
- 544 47. Group RC. Tocilizumab in patients admitted to hospital with COVID-19  
545 (RECOVERY): a randomised, controlled, open-label, platform trial. *Lancet*.  
546 2021;397(10285):1637-1645.
- 547 48. Mostafa MM, Rider CF, Shah S, et al. Glucocorticoid-driven transcriptomes in human  
548 airway epithelial cells: commonalities, differences and functional insight from cell lines  
549 and primary cells. *BMC Med Genomics*. 2019;12(1):29.
- 550 49. Lucifora J, Xia Y, Reisinger F, et al. Specific and nonhepatotoxic degradation of nuclear  
551 hepatitis B virus cccDNA. *Science*. 2014;343(6176):1221-1228.
- 552 50. Milewska A, Kindler E, Vkovski P, et al. APOBEC3-mediated restriction of RNA virus  
553 replication. *Sci Rep*. 2018;8(1):5960.
- 554 51. Wang Y, Schmitt K, Guo K, Santiago ML, Stephens EB. Role of the single deaminase  
555 domain APOBEC3A in virus restriction, retrotransposition, DNA damage and cancer.  
556 *J Gen Virol*. 2016;97(1):1-17.
- 557 52. Rodgers HC, Pang L, Holland E, Corbett L, Range S, Knox AJ. Bradykinin increases  
558 IL-8 generation in airway epithelial cells via COX-2-derived prostanoids. *Am J Physiol*  
559 *Lung Cell Mol Physiol*. 2002;283(3):L612-618.
- 560 53. Norelli M, Camisa B, Barbiera G, et al. Monocyte-derived IL-1 and IL-6 are  
561 differentially required for cytokine-release syndrome and neurotoxicity due to CAR T  
562 cells. *Nat Med*. 2018;24(6):739-748.
- 563 54. Tay MZ, Poh CM, Renia L, MacAry PA, Ng LFP. The trinity of COVID-19: immunity,  
564 inflammation and intervention. *Nat Rev Immunol*. 2020.
- 565 55. Merad M, Martin JC. Pathological inflammation in patients with COVID-19: a key role  
566 for monocytes and macrophages. *Nat Rev Immunol*. 2020.
- 567 56. Mingfeng Liao YL, Jing Yuan, Yanling Wen, Gang Xu, Juanjuan Zhao, Lin Cheng,  
568 Jinxiu Li, Xin Wang, Fuxiang Wang, Lei Liu, Ido Amit, Shuye Zhang & Zheng Zhang.  
569 Single-cell landscape of bronchoalveolar immune cells in patients with COVID-19. *Nat*  
570 *Med*. 2020.
- 571 57. Zmora P, Hoffmann M, Kollmus H, et al. TMPRSS11A activates the influenza A virus  
572 hemagglutinin and the MERS coronavirus spike protein and is insensitive against  
573 blockade by HAI-1. *J Biol Chem*. 2018;293(36):13863-13873.
- 574 58. Kishimoto M, Uemura K, Sanaki T, et al. TMPRSS11D and TMPRSS13 Activate the  
575 SARS-CoV-2 Spike Protein. *Viruses*. 2021;13(3).

- 576 59. Han DP, Lohani M, Cho MW. Specific asparagine-linked glycosylation sites are critical  
577 for DC-SIGN- and L-SIGN-mediated severe acute respiratory syndrome coronavirus  
578 entry. *J Virol.* 2007;81(21):12029-12039.
- 579 60. van de Veerdonk FL, Kouijzer IJE, de Nooijer AH, et al. Outcomes Associated With  
580 Use of a Kinin B2 Receptor Antagonist Among Patients With COVID-19. *JAMA Netw*  
581 *Open.* 2020;3(8):e2017708.
- 582 61. Abdel Hameid R, Cornet-Boyaka E, Kuebler WM, Uddin M, Berdiev BK. SARS-CoV-  
583 2 may hijack GPCR signaling pathways to dysregulate lung ion and fluid transport. *Am*  
584 *J Physiol Lung Cell Mol Physiol.* 2021;320(3):L430-L435.
- 585 62. Stukalov A, Girault V, Grass V, et al. Multilevel proteomics reveals host perturbations  
586 by SARS-CoV-2 and SARS-CoV. *Nature.* 2021;594(7862):246-252.  
587

588 **FIGURE LEGENDS**

589 **Figure 1. Induction of kallikreins and kinin receptor B<sub>2</sub> in the nasal mucosa of acutely**  
590 **positive Covid-19 patients**

591 A) Volcano plot of significantly differentially regulated genes (DEGs = differentially expressed  
592 genes) in nasal brushings of patients that were acute positive for SARS-CoV-2 compared to  
593 healthy individuals (negative) using human miR microarray technology. Highlighted genes  
594 have a fold-change (FC)  $\geq 10$  with  $P < 0.05$ , genes in red are up-regulated, genes in blue are  
595 downregulated. B) Heat map of gene expression analysis of kallikrein genes and C) of genes of  
596 the kinin-kallikrein system (KKS) in nasal brushings comparing SARS-CoV-2 acute-positive  
597 patients to healthy controls. All entities with  $FC \geq 1.2$  are shown. Asterisks indicate significantly  
598 regulated genes ( $P < 0.05$ ) in SARS-CoV-2-infected NHBEs compared to medium. Color code  
599 indicates Log<sub>2</sub>-fold change from low (blue) through 0 (white) to high (red). Duplicate gene  
600 names indicate the abundance of two or more isoforms of the same gene in the analysis. D) 3D-  
601 air-liquid interphase cultures from NHBEs were pre-treated for 24 hours with/without 1 nM  
602 B<sub>2</sub>R antagonist from the basal side and subsequently infected with SARS-CoV-2 for 48 hours  
603 from the apical side.

604 E) Lactate dehydrogenase (LDH) cytotoxicity assay using the LDH Cytotoxicity Detection Kit  
605 PLUS studying the effect of increasing doses of the B<sub>2</sub>R antagonist after 48 hours in primary  
606 NHBEs from 4 donors. Results are depicted as mean  $\pm$  s.e.m. Statistical tests compared each  
607 dose of B<sub>2</sub>R antagonist with 0 nM B<sub>2</sub>R antagonist.

608 F) Cytotoxicity assay determining LDH release into the supernatants of cultures of SARS-CoV-  
609 2-infected NHBEs from 12 donors that were pre-treated for 24 hours with/without 1 nM B<sub>2</sub>R  
610 antagonist.

611 G) Quantification of infectious particles in the supernatants of SARS-CoV-2-infected NHBEs  
612 from 10 donors that were pre-treated with/without 1 nM B<sub>2</sub>R antagonist for 24 hours.  
613 Supernatants were titrated on Vero E6 cells and plaque assay was quantified 24 hours later.

614 Results are depicted as plaque forming units (PFU) per milliliter.

615 H) qPCR analysis of total SARS-CoV-2 RNA (viral genome and transcripts, which all contain  
616 the N1 sequence region) normalized to human *ACTB* of SARS-CoV-2-infected primary NHBE  
617 after 24 hours of pre-treatment with/without 1 nM B<sub>2</sub>R antagonist followed by 24 hours of  
618 SARS-CoV-2 inoculation. For Figures 1E, F, and H, statistical tests compared SARS-CoV-2-  
619 infected versus uninfected samples or B<sub>2</sub>R antagonist-treated versus untreated samples.

620 I) Analysis of human ACE2 gene expression using qPCR (n=10) and J) of human ACE2 protein  
621 levels analyzed by ELISA from cell lysates (n=6) after 24 hours of pre-treatment of NHBEs  
622 with/without 1 nM B<sub>2</sub>R antagonist, followed by SARS-CoV-2 inoculation for 24 hours.

623

624 **Figure 2. Treatment of NHBE with B<sub>2</sub>R antagonist post-infection in repeated doses**  
625 **inhibits SARS-CoV-2 replication**

626 A) *In vivo* mouse study. 12 sex-matched mice from three different strains per group were treated  
627 on day 0 with intranasal application of 1 µg murine IL-12Fc per mouse or PBS as control to  
628 mimic virus-induced airway inflammation. After 48h, mice were injected s.c. with 2 nmol of  
629 the B<sub>2</sub>R antagonist icatibant per 10 g of body weight or PBS as control. The experiment was  
630 terminated either six hours or 24 hours later and murine lung ACE2 protein levels were  
631 analyzed by mouse ACE2 ELISA analysis. Circle: female; triangle: male. Black: C57BL/6, mid  
632 grey: C3H HeN, light grey: BALB/c strain. The experiment was carried out twice and the data  
633 in the figure represent the mean of each mouse type (strain / sex) of both experiments. Statistical  
634 tests compared B<sub>2</sub>R antagonist -treated versus untreated groups.

635 B) Cytotoxicity assay determining LDH in supernatants from SARS-CoV-2-infected NHBEs  
636 from 12 donors that were treated with/without 1 nM B<sub>2</sub>R antagonist after 6 hours of infection  
637 for another 24 hours. C) Quantification of infectious particles in the supernatants from SARS-  
638 CoV-2-infected NHBEs from 4 donors that were treated with/without 1 nM B<sub>2</sub>R antagonist  
639 after 6 hours of infection for another 24 hours. Supernatants were titrated on Vero E6 cells and



640 plaque assay was quantified 24 hours later. Results are depicted as plaque forming units (PFU)  
641 per milliliter. For Figures 2B-C, statistical tests compared B<sub>2</sub>R antagonist-treated versus  
642 untreated samples.

643 D) Relative quantification of total SARS-CoV-2 RNA (viral genome and transcripts, which all  
644 contain the N1 sequence region) and G) genomic SARS-CoV-2 RNA (containing the *RdRP*  
645 gene) normalized to housekeeping gene index of human *ACTB*, *HPRT*, *18S* in NHBEs from 8  
646 independent donors that were infected with SARS-CoV-2 for 6 hours and then treated with  
647 increasing doses of the B<sub>2</sub>R antagonist icatibant repeatedly every 24 hours for a total of 96  
648 hours. In cells treated with E) 100 nM and F) 1000 nM icatibant for 48 hours and with H) 100  
649 nM and I) 1000 nM icatibant for 72 hours, total SARS-CoV-2 RNA and genomic SARS-CoV-  
650 2 RNA were significantly reduced. Red indicates SARS-CoV-2 infection; blue indicates B<sub>2</sub>R  
651 antagonist treatment. PRE indicates pre-treatment; POST indicates post-treatment. In Fig.2D-  
652 I, results are depicted as mean  $\pm$  s.e.m. and statistical tests compared each dose of icatibant with  
653 0 nM icatibant. Statistically significant differences were depicted as p-values \*P<0.05,  
654 \*\*P<0.01, and \*\*\*P<0.001. ns indicates non-significant. + infected / treated; - indicates not  
655 infected / not treated.

656

657 **Figure 3. B<sub>2</sub>R antagonism exhibits a protective and suppressive effect on gene expression**  
658 **profile of airway epithelial cells.**

659 A) Volcano plots showing global gene expression changes induced by either treatment with  
660 B<sub>2</sub>R antagonist or hydrocortisone (HC). Red indicates significantly upregulated entities; blue  
661 indicates significantly downregulated entities. Gene expression analysis of pre-treated NHBEs  
662 after 24 hours of SARS-CoV-2 infection. B) Heat map of gene expression analysis of genes  
663 involved in the epithelial antiviral response, analysis of the effects of SARS-CoV-2 infection.  
664 Only entities with significant changes between SARS-CoV-2 infection and medium are shown  
665 (gene expression fold change FC $\geq$ 1.5 with P<0.05). C) Heat map of gene expression analysis

666 of genes involved in the acute phase response are depicted. All entities are shown. Asterisks  
667 indicate significantly regulated genes ( $P < 0.05$ ) in SARS-CoV-2 compared to medium. D) Heat  
668 map of gene expression analysis of known and potential virus entry receptors are depicted. All  
669 entities are shown. Color code indicates Log<sub>2</sub>-fold change from low (blue) through 0 (white)  
670 to high (red). Asterisks indicate significantly regulated genes ( $P < 0.05$ ) in SARS-CoV-2-  
671 infected NHBEs compared to medium. Duplicate gene names indicate the presence of two or  
672 more isoforms of the same gene in the analysis. E) Analysis of *TMPRSS2* gene expression by  
673 qPCR after 24 hours of pre-treatment with/without 10  $\mu$ M hydrocortisone (HC) followed by 24  
674 hours of SARS-CoV-2 inoculation. Red indicates SARS-CoV-2 infection; yellow indicates pre-  
675 treatment with hydrocortisone (HC). Statistical tests compared SARS-CoV-2-infected versus  
676 uninfected samples or B<sub>2</sub>R antagonist-treated versus untreated samples.

677 F) Quantification of infectious particles in the supernatants of SARS-CoV-2-infected NHBEs  
678 from 10 donors that were pre-treated with/without 10  $\mu$ M hydrocortisone (HC) for 24 hours.  
679 Supernatants were titrated on Vero E6 cells. The plaque assay was quantified 24 hours later.  
680 Results are depicted as plaque forming units (PFU) per milliliter.

681

682 **Figure 4. B<sub>2</sub>R antagonism exhibits a protective and suppressive effect on gene expression**  
683 **profile of airway epithelial cells.**

684 GO term enrichment analysis, which results from the string network analysis of significant  
685 DEGs from the gene expression analysis comparing infected NHBE pretreated with B<sub>2</sub>R  
686 antagonist with untreated infected NHBE (SARS-CoV-2 + B<sub>2</sub>R antagonist *versus* SARS-CoV-  
687 2). Depicted are enrichment of A) GO-term GO:0007186 “G protein-coupled receptor signaling  
688 pathway” and B) GO-term GO:0006811 “Ion transport”. Genes that were significantly  
689 upregulated in the comparison SARS-CoV-2 versus medium are highlighted in red. C) Venn  
690 diagram showing the cut set of upregulated membrane-bound cell surface receptors in SARS-  
691 CoV-2 *versus* medium and of downregulated DEGs in SARS-CoV-2 + icanbant *versus* SARS-

692 CoV-2 ( $FC \geq 1.5$ ;  $P \leq 0.05$ ). D) Heat map of gene expression analysis of the 35 membrane-bound  
693 cell surface receptors defined in cut set from Fig.4C, all upregulated upon SARS-CoV-2  
694 infection and downregulated upon pre-treatment with B<sub>2</sub>R antagonist are depicted. Only entities  
695 with significant changes between SARS-CoV-2 infection and medium (up) and between SARS-  
696 CoV-2 + B<sub>2</sub>R antagonist and SARS-CoV-2 (down) are shown (gene expression fold change  
697  $FC \geq 1.5$  with  $P < 0.05$ ). Color code indicates Log<sub>2</sub>-fold change from low (blue) through 0 (white)  
698 to high (red). Duplicate gene names indicate the abundance of two or more isoforms of the same  
699 gene in the analysis.

700  
701

702 Table 1. Demographic data of patient cohort

| <b>Parameter</b> | <b>Negative<br/>(n = 7)</b> | <b>Positive acute<br/>(n = 4)</b> | <b>p-value</b> |
|------------------|-----------------------------|-----------------------------------|----------------|
| Age (years)*     | 35.86 ± 3.86                | 37.50 ± 8.78                      | n.s.           |
| Sex (m/f)        | 2/5                         | 1/3                               |                |
| IgM (ng/mL)      | 1.32 ± 0.28                 | 4.34 ± 2.81                       | n.s.           |
| IgG (ng/mL)      | 0.48 ± 0.08                 | 67.08 ± 19.51                     | 0.0061         |

703 negative: tested negative in SARS-CoV-2 qPCR; positive acute: tested positive in SARS-CoV-2 qPCR; IgM:  
704 immunoglobulin M; IgG: immunoglobulin G; values are depicted as mean ± s.e.m.; n.s. not significant  
705 \*at informed consent procedure and inclusion into study

### A - nasal transcriptome: secreted genes

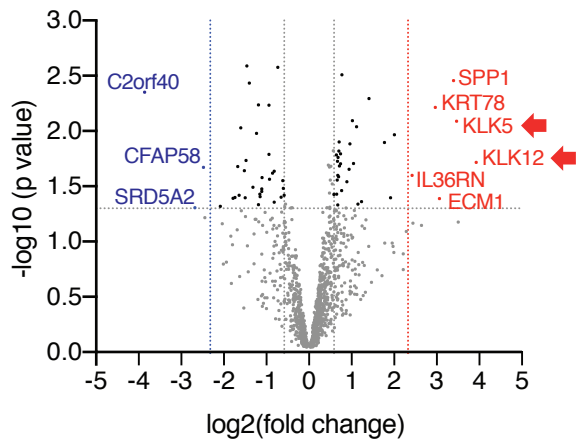

### B - kallikreins

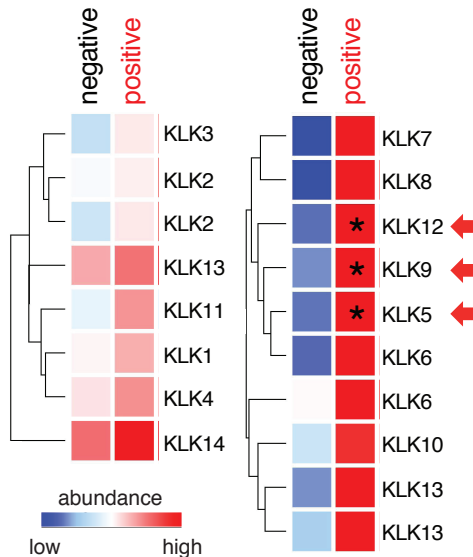

### C - kinin-kallikrein system

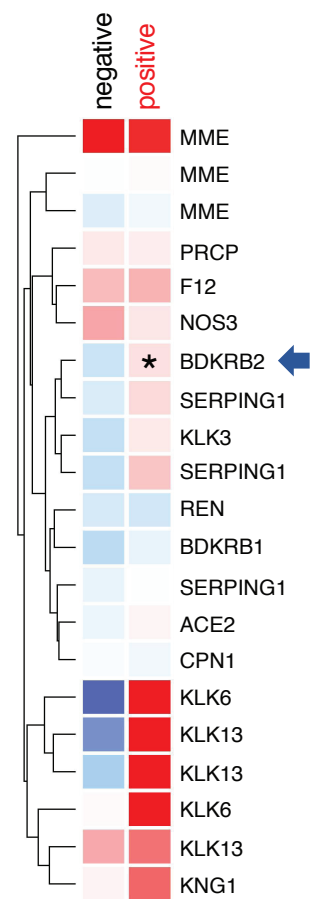

### D - 3D bronchial organoid cultures

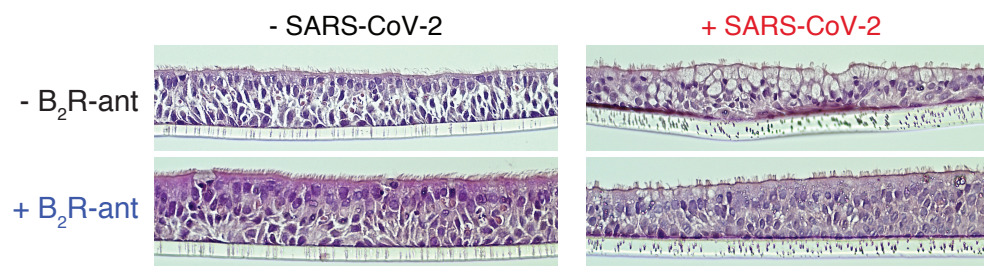

### E - Cytotoxicity in uninfected NHBE

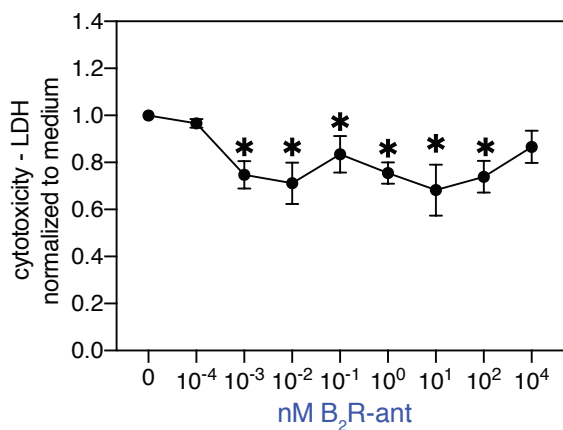

### F - Cytotoxicity treatment pre-infection

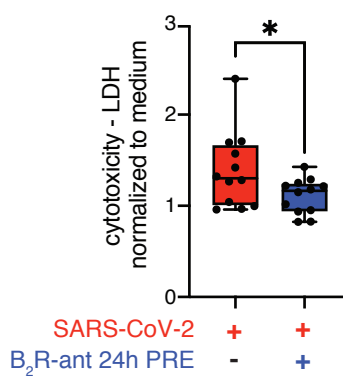

### G - Plaque assay treatment pre-infection

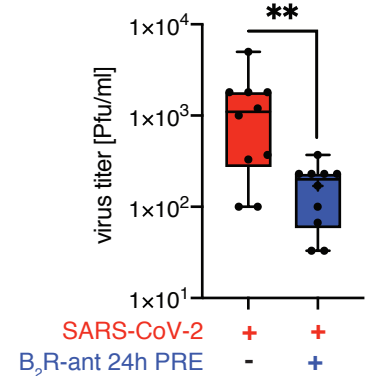

### H - total viral RNA treatment pre-infection

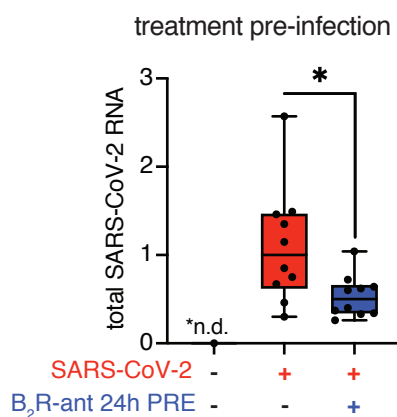

### I - ACE2 mRNA levels treatment pre-infection

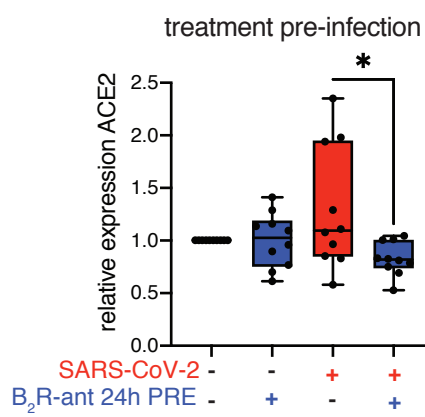

### J - ACE2 protein levels treatment pre-infection

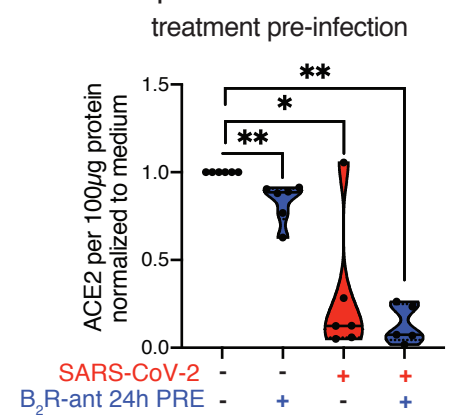

**A - Mouse lung: ACE2 protein levels**  
treatment post airway inflammation

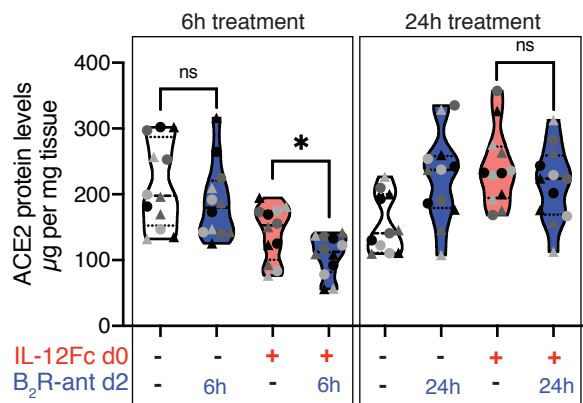

**B - Cytotoxicity**  
treatment post-infection

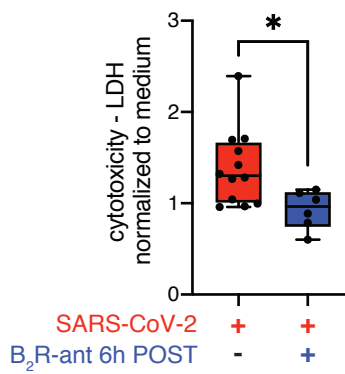

**C - Plaque assay**  
treatment post-infection

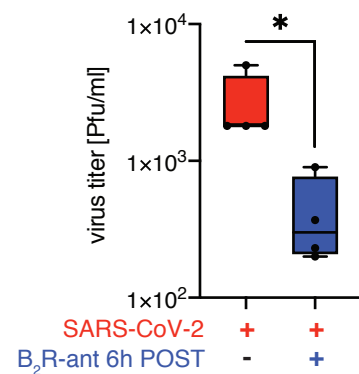

Treatment post-infection:

**D - total viral RNA**

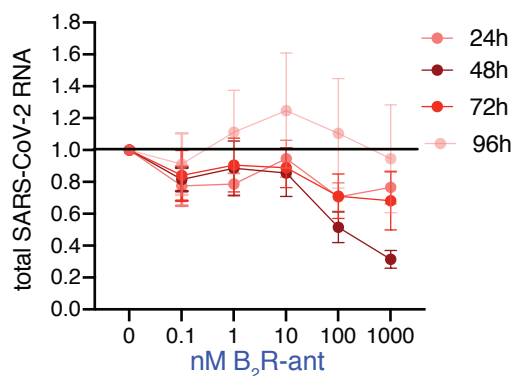

**E - total viral RNA 48h**

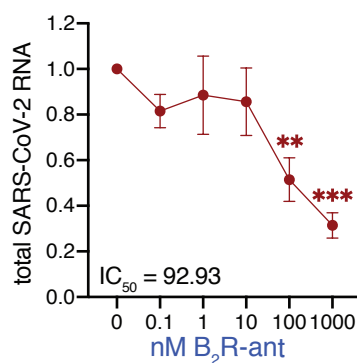

**F - total viral RNA 72h**

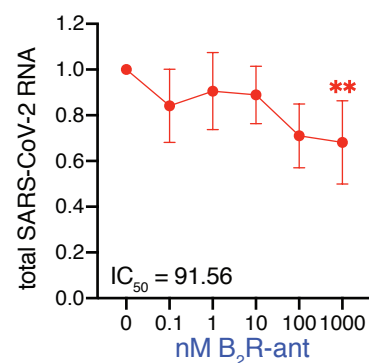

**G - genomic viral RNA**

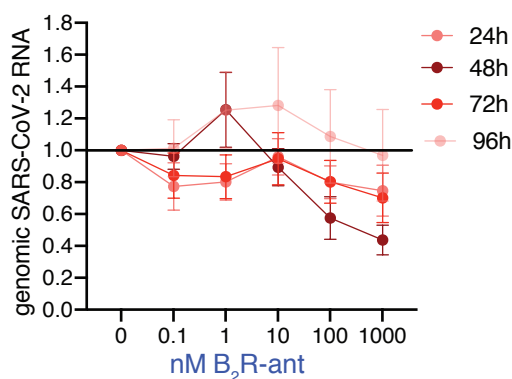

**H - genomic viral RNA 48h**

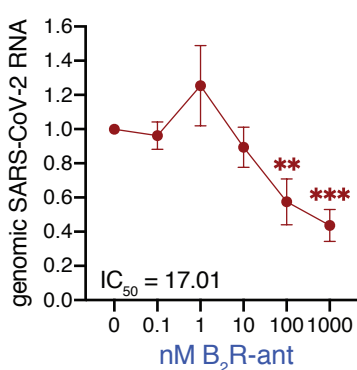

**I - genomic viral RNA 72h**

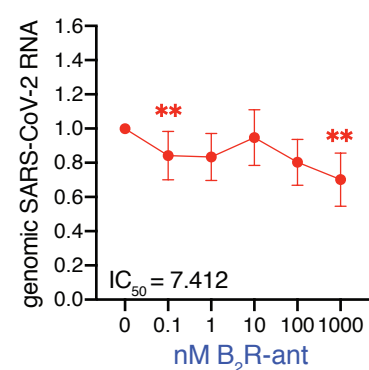

### A - DEGs: B<sub>2</sub>R-ant effect vs HC effect

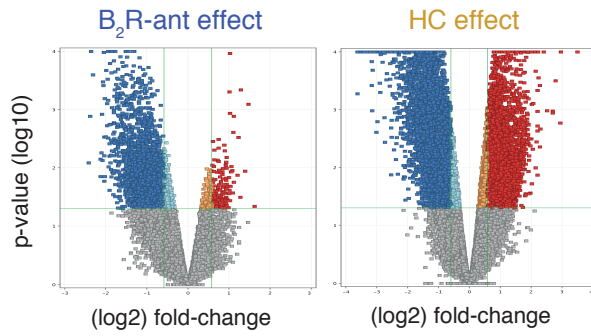

### B - Antiviral response

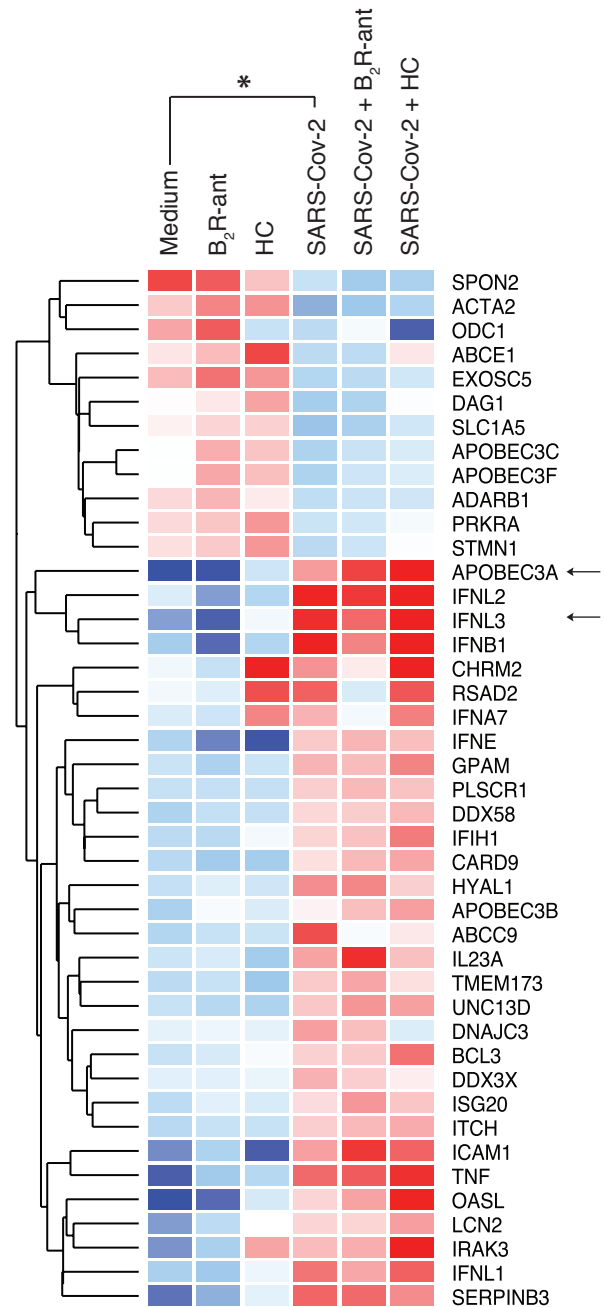

### C - Acute-phase response

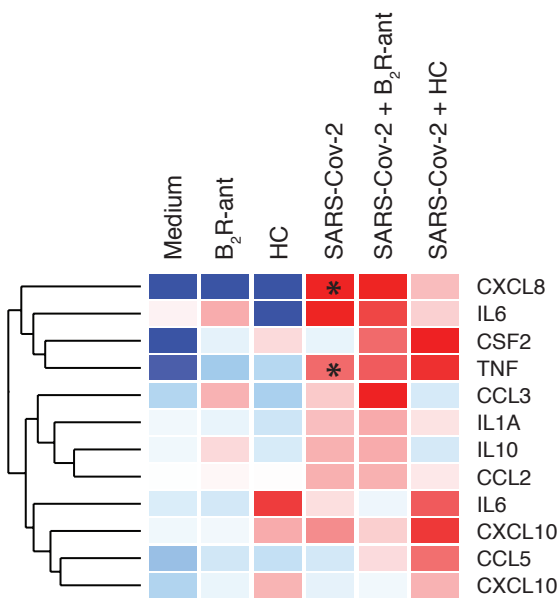

### D - Entry Receptors

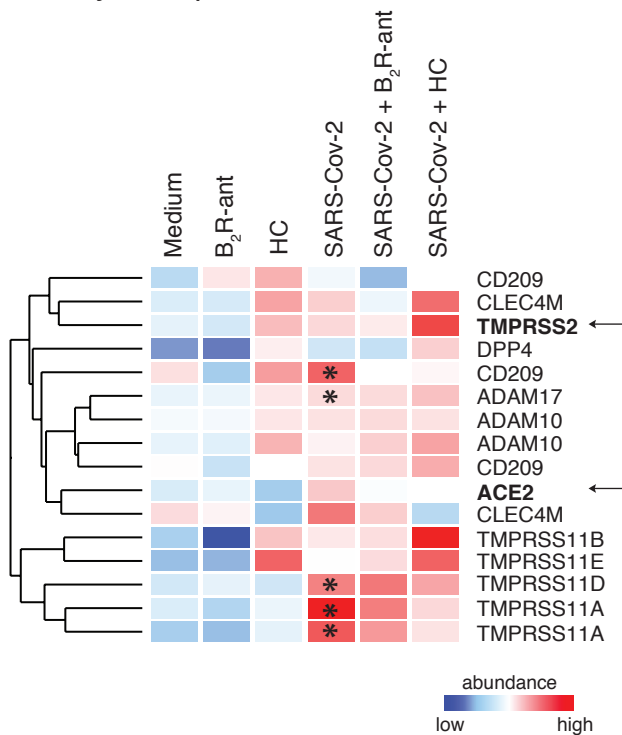

### E - TMPRSS2 mRNA

HC treatment pre-infection

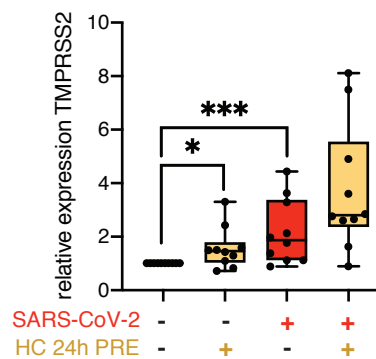

### F - Plaque assay

HC treatment pre-infection

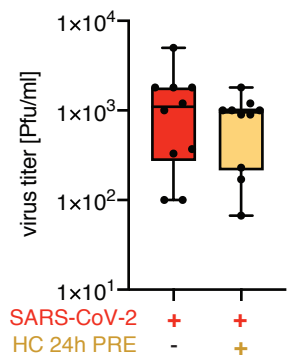

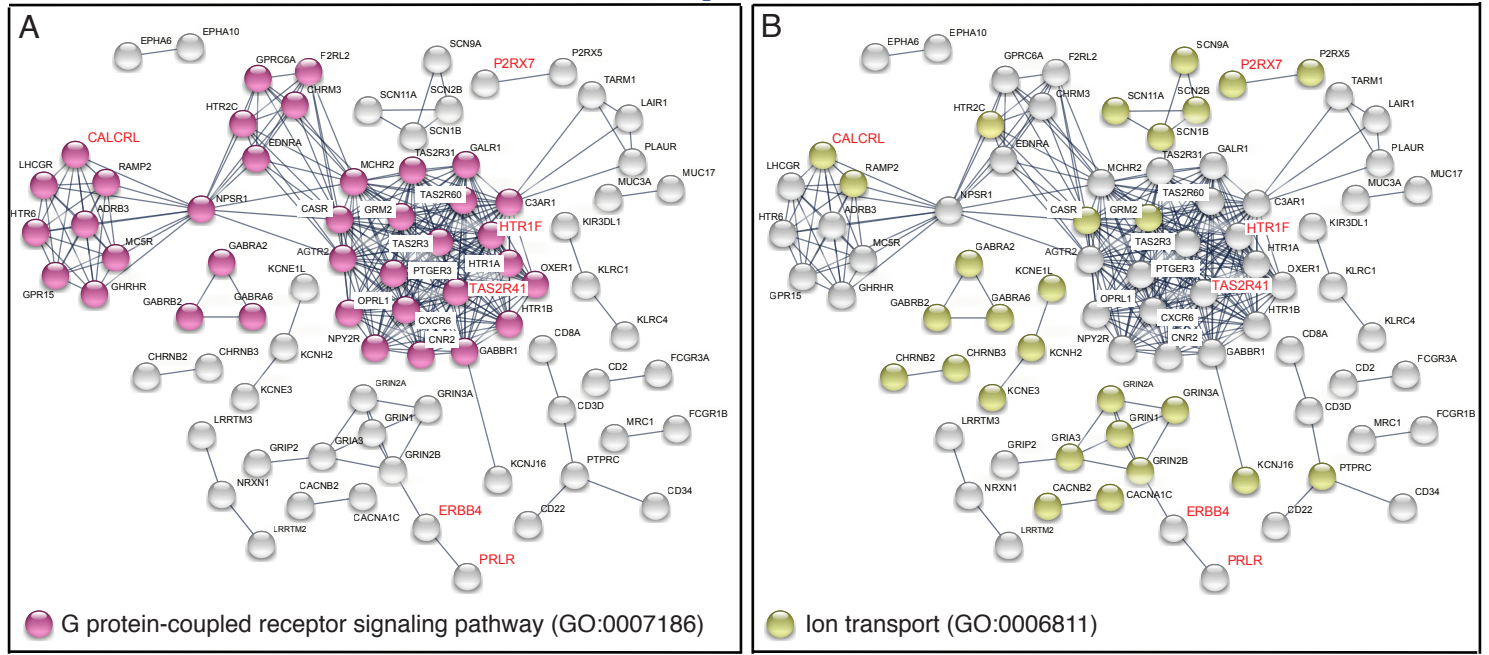

**C - Counter-regulation of SARS-CoV-2-induced DEGs by B<sub>2</sub>R antagonist**

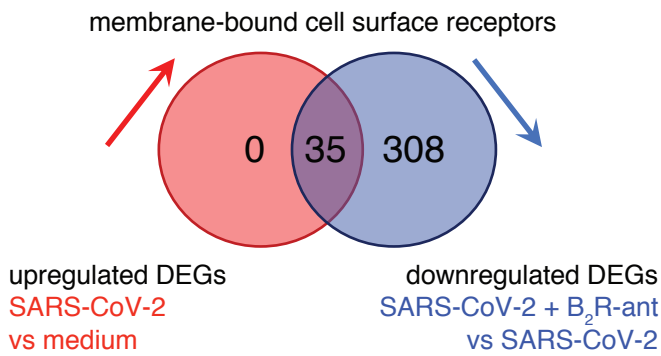

**D - Membrane-bound cell surface receptors**

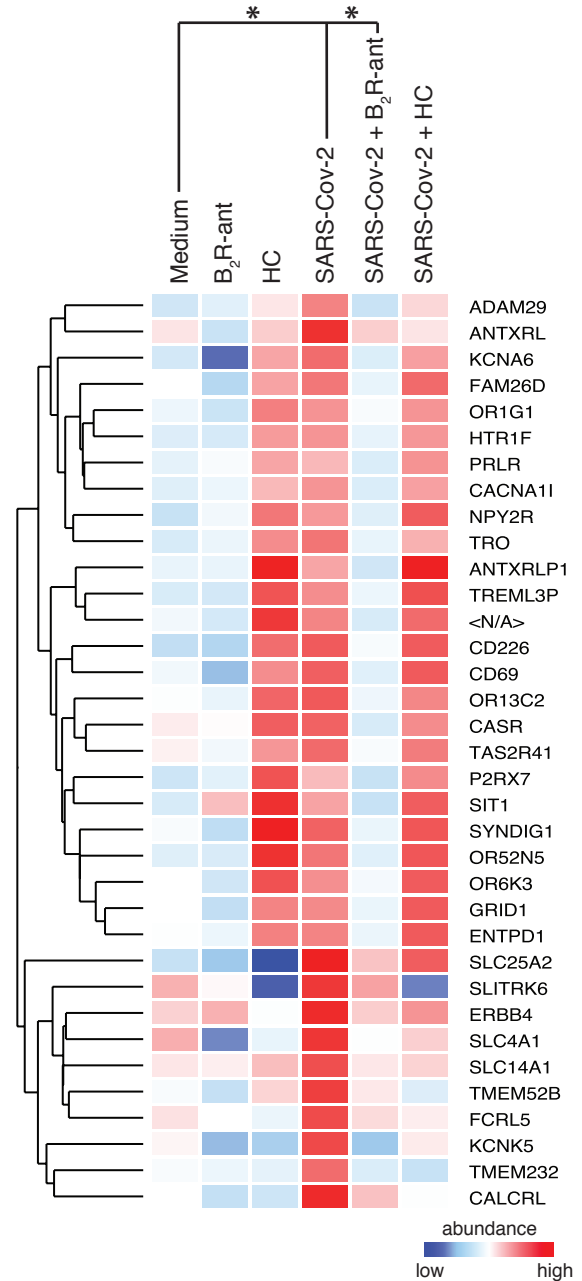

Source: http://medrxiv.org/content/10.1101/2021.08.13.21262037v1.full.pdf
