# Supplementary material for: Early Reduction of SARS-CoV-2 Replication in Bronchial Epithelium by Kinin B2 Receptor Antagonism
Source: bioRxiv or medRxiv preprint supplement (doi:10.1101/2021.08.13.21262037), 2021-08-18
Supplement: Supplementary file [file media-1.pdf]

# 1 SUPPORTING INFORMATION

2

## 3 MATERIALS AND METHODS

4 **Cell culture.** Primary normal human bronchial epithelial cells (NHBE, Lonza) from genetically  
5 independent donors were grown as monolayers from low passages in serum-free pre-defined  
6 bronchial epithelial cell growth medium according to manufacturer's instructions (BEGM  
7 BulletKit, Lonza). NHBEs were treated in 12-well plates at 80% confluence. To avoid effects  
8 induced by growth factors in the BEGM medium, cells were rested in basal medium without  
9 supplements for 12 hours, then stimulated with icatibant at 1 nM or hydrocortisone at 10 µM,  
10 followed by further 24 hours of infection with SARS-CoV-2 at the biosafety level 3 laboratory.  
11 For RNA analysis, cells were lysed in RLT buffer (Qiagen, Hilden, Germany). For protein  
12 analysis, cells were lysed in 1x protein extraction buffer provided with the ACE2 ELISA Kit  
13 (Abcam, Cambridge, UK). Cell culture supernatant was collected for further viral and cytolytic  
14 analysis.

15

16 **Infection with SARS-CoV-2.** The SARS-CoV-2 isolate hCoV-19/Germany/BAV-PL-  
17 virotum-nacq/2020 (GISAID accession ID: EPI\_ISL\_582134) was derived from patient  
18 material and amplified on Vero E6 cells (passage 0; ATCC, Manassas, US) and used for  
19 infection experiments (passage 4) with an MOI of 0.5 (determined by plaque assay) by adding  
20 virus stock to the BEBM culture medium after 24 hours of stimulation. Time of harvest after  
21 inoculation was dependent on the experimental setting. For repetitive treatment with icatibant  
22 of NHBEs post-infection (Fig.2D-I), NHBEs from 8 genetically independent donors were  
23 infected with SARS-CoV-2 with a MOI of 0.5 at T-6 and after 6 hours (T0), treatment with a  
24 range of doses of icatibant was started and repeated every 24 hours. Cells were harvested at 24,  
25 48, 72 and 96 hours after treatment start and subjected to RNA extraction and relative viral  
26 RNA quantification normalized to a housekeeper index.

27

28 **Plaque assay.** Supernatant of SARS-CoV-2-infected NHBEs was titrated (1:5 dilutions of the  
29 stock) in Dulbecco's Modified Eagle Medium (DMEM) with 1% penicillin / streptomycin, 1%  
30 L-glutamine, 1% non-essential aminoacids, and 1% sodium pyruvate (all Gibco, Thermo Fisher  
31 Scientific, Carlsbad, CA, USA) in a total volume/well of 100  $\mu$ l on 96-well plates containing  
32 70-80 % confluent Vero E6 cells. After 2 hours, the inoculum was discarded, and cells were  
33 layered with 100  $\mu$ l MEM containing 0.5 % carboxymethyl cellulose (1,500 cP, Sigma-Aldrich,  
34 St. Louis US). 48 hours post inoculation, 100  $\mu$ l formaldehyde was added to a final  
35 concentration of 5 % for 15 min. Supernatant was taken off, cells were washed with PBS twice  
36 and incubated with crystal violet (Sigma-Aldrich) solution for 15 min and washed with PBS  
37 again. Plaque-forming units per milliliter pfu/ml were calculated with the formula  $\text{pfu/mL} =$   
38 number of plaques/dilution x volume of analyzed supernatant.

39

40 **RNA isolation and gene expression analysis.** mRNA was extracted from patient nasal  
41 brushings and from NHBEs using RNeasy Micro Kit (Qiagen) with on-column DNase digestion  
42 (Qiagen). RNA quantification and quality assessment were performed using Nanodrop  
43 Technologies (Wilmington) and RNA 6000 Nano Chip Kit with the Agilent 2100 Bioanalyzer  
44 (Agilent Technologies, Waldbronn, Germany) according to manufacturer's instructions.

45

46 **RT-qPCR-based detection of SARS-CoV-2 RNA.** Isolated RNA was subject to cDNA  
47 synthesis by SuperScript III First-Strand Synthesis SuperMix for qRT-PCR (Invitrogen). On a  
48 LightCycler 480 II (Roche Diagnostics, Penzberg, Germany) total SARS-CoV-2 RNA was  
49 quantified using SARS-CoV-2 N1 primers and probe according to CDC guidelines and a SYBR  
50 Green PCR mix (Roche Diagnostics). SARS-CoV-2 genomic RNA was quantified using RdRP  
51 primers. The specific primers used in real-time PCR are listed in Table S21. SARS-CoV-2 RNA  
52 was normalized with relative quantification to endogenous control ACTB using the  $1/ECT$

53 formula.

54

55 **3D-bronchial air-liquid interphase organoid cultures.** Low passage primary NHBEs were  
56 expanded to 95% confluence in PneumaCult-Ex Plus expansion medium (Stemcell) according  
57 to manufacturer's instructions. Corning transwell polyester membrane cell culture inserts (type  
58 3460, Merck) were precoated with 1% collagen (Sigma-Aldrich) and the cells were transferred  
59 to 12-well plates containing precoated transwell inserts on day 0 with a density of  $3 \times 10^5$   
60 cells/cm<sup>2</sup>. Every other day, PneumaCult-Ex Plus expansion medium (Stemcell) was replenished  
61 in apical and basal chambers. On day 3, cells were lifted to air (air-lift) by removing the apical  
62 medium. Medium in the basal chamber was exchanged for Pneumacult-ALI maintenance  
63 medium (Stemcell). Excess mucus was removed from day 7. Once a week, the transepithelial  
64 electrical resistance (TEER) was measured using an EVOM2 instrument (World Precision  
65 Instruments). With a TEER of >700, but from day 21 at the earliest, the 3D organoid cultures  
66 were regarded as completely differentiated and were then treated and infected with SARS-CoV-  
67 2.

68

69 **Infection of 3D organoid cultures.**

70 24 hours prior to treatment of the 3D air-liquid interphase organoid cultures, the supplement  
71 hydrocortisone was withdrawn. The cultures were then pretreated from the basal side  
72 with/without 1 nM icatibant (HOE 140 (icatibant), Sigma-Aldrich) for 24 hours. Subsequently,  
73 SARS-CoV-2 viral suspension (MOI 0.5, strain hCoV-19/Germany/BAV-PL-virotum-  
74 nacq/2020) was added from the apical side and incubated for 2 hours, then the virus suspension  
75 was removed with PBS washes and the cultures were kept for another 46 hours before harvest.

76

77 **FFPE sections of 3D organoid cultures.** Cultures were fixed in 4% paraformaldehyde and  
78 embedded in paraffin and sections of 4 μm thickness were produced at the routine diagnostics

79 at the Medical School of the Technical University of Munich, Campus Biederstein. Slides were  
80 subjected to standard hematoxylin eosin staining to identify the culture structure by light  
81 microscopy.

82

83 **Tissue homogenization and murine ACE2 ELISA.** Tissue lysates were prepared by  
84 homogenization in ice-cold lysis buffer (Cell Signaling) to a final concentration of 2x lysis  
85 buffer in water, containing protease inhibitor (Complete Mini, Roche). 0.1 ml of lysis buffer  
86 was added per 100 mg of tissue. Tissue was homogenized using metal beads and Qiagen tissue  
87 lyser 20/s for 90 seconds until it was completely homogenized. Samples were centrifuged for  
88 10 minutes at 11,000 x g at 4°C and supernatants were transferred to fresh tubes. Total protein  
89 concentration was determined with the Pierce BCA Protein Assay Kit (Thermo Scientific) to  
90 determine extraction efficacy across samples, before further analysis by ELISA. Mouse ACE2  
91 ELISA (PicoKine Kit, Boster Bio) was performed according to the manufacturer's instructions  
92 using tissue lysate diluted 1:100. Colorimetric readout was acquired using Spark microplate  
93 reader (Tecan). Data analysis was performed using Microsoft Excel, R and GraphPad Prism.

94

95 **Reverse transcription and quantitative real-time qPCR.** Isolated total RNA was reverse  
96 transcribed using a high-capacity cDNA kit (Applied Biosystems) according to manufacturer's  
97 instructions. Real-time PCR profiles were visualized using FastStart Universal SYBR Green  
98 Mastermix (Roche) and quantified by the ViiA 7 Real-Time PCR System (Applied  
99 Biosystems). The specific primers used in real-time PCR are listed in supplementary Table S21.  
100 ACE2 and TMPRSS2 mRNA expression was normalized to housekeeping gene index *ACTB*  
101 and *HPRT* and the relative quantification was performed using the comparative threshold cycle  
102 ( $2^{-\Delta\Delta C_t}$ ) method (relative gene expression). All amplifications were carried out at least in  
103 duplicate.

104

105 **Gene expression analysis using Agilent microarray technologies.** Microarray experiments  
106 were performed using MIAME criteria. Genespring Software GX 14.9.1 (Agilent  
107 Technologies) with minimal data reduction constraints (1.5-fold change and  $P < 0.05$  cutoff) was  
108 used to analyze microarray data as previously described.<sup>1,2</sup> Upon data import a standard  
109 baseline transformation to the median of all values was performed, including log transformation  
110 and computation of fold changes ( $\log_2(A/B) = \log_2(A) - \log_2(B)$ ). Subsequently, a principle  
111 component analysis was conducted, which revealed a homogenous component distribution.  
112 Compromised array signals were excluded from further analysis (array spot is non-uniform if  
113 pixel noise of feature exceeds threshold or is above saturation threshold). Genes with an  
114 absolute  $\log_2$  fold change larger than 1.5 and a p-value smaller than the testing level of 0.05 by  
115 using the Moderated T-Test were defined as significantly differentially expressed hits. The  
116 significantly regulated genes were summarized in entity lists (see supplemental tables). These  
117 entity lists were analyzed for overlaps using Venn diagrams. Manhattan cityblock on entities  
118 (Ward's linkage) was used to cluster changes in gene expression.

119 Gene Ontology (GO) terms "0007267", "0005125", "0008009", and "0005615" for secreted  
120 factors, GO terms "0007267", "0005125", "0008009", and "0005615" for identification of  
121 biomarkers, GO terms "0038023", "0004896", "0004888", and "0005887" for surface receptors,  
122 GO terms "0009615", "0039528", "0039530", "0039639", "0051607", and "0009597" for anti-  
123 viral response. Membrane-bound cell surface receptors were selected from a Venn diagram  
124 analysis of the GO-term selection of surface receptors (see above) minus the GO-term selection  
125 of secreted genes (see above) in order to isolate surface receptors that are not as well secreted  
126 as soluble ligands. The data discussed in this publication will be deposited in NCBI's Gene  
127 Expression Omnibus and are accessible through GEO Series accession number pending.

128

129 **String network analysis.** Protein-protein interactions were computed using an open-access  
130 tool, the string network analysis version 11.0 (string-db.org)<sup>3-13</sup> in order to extract enriched

131 cellular processes and pathways affected by icatibant treatment. The classical classification  
132 systems Gene Ontology was relevant for this study. Enriched entities are colored in the  
133 interaction plots: violet for GO:0007186 “G protein-coupled receptor signaling pathway” and  
134 light green for GO:0006811 “Ion transport” in Figure 2.

135

136 **Cytotoxicity assay.** Lactate Dehydrogenase Assay (LDH) assay for assessing the cytotoxicity  
137 of virus-infected NHBES in combination with or without icatibant was performed using the  
138 LDH-detecting CytoTox 96® Non-Radioactive Cytotoxicity Assay (Promega GmbH)  
139 according to manufacturer’s instructions.

140

141 **ELISA for human ACE2 levels.** Protein levels of ACE2 in NHBE cell lysates were determined  
142 using the human ACE2 ELISA Kit (Abcam). Assays were performed according to  
143 manufacturer’s instructions.

144

145 **Statistical analysis.** Two-tailed Mann-Whitney U tests were used to determine statistical  
146 significance (GraphPad Prism Version 8.4.2, GraphPad Software). For the in vivo mouse study,  
147 we performed a prospective power analysis based on human data that predict a 33% reduction  
148 in ACE2 following icatibant treatment (mean 1: 1; mean 2: 0.666; SD: 0.26; alpha = 0.05; P =  
149 0.9, power.t.test in R, rounded up). In accordance with the criteria of this *a priori* power  
150 analysis, we used a 1-tailed t-test, that compared icatibant-treated groups with untreated groups,  
151 resulting in 12 animals per group. Here, we have specifically tested the hypothesis for a  
152 downregulation of ACE2 only in mice treated with icatibant compared to untreated mice. The  
153 half maximal inhibitory concentration (IC<sub>50</sub>) values were deferred from sigmoidal interpolation  
154 of a standard curve using a robust nonlinear regression model in GraphPad Prism. Results are  
155 depicted as median with range, if not otherwise indicated in the figure legends. P<0.05 was  
156 considered statistically significant. Statistically significant differences were depicted as p-

157 values \*P<0.05, \*\*P<0.01, and \*\*\*P<0.001.

158

159 **Data availability statement.** The data discussed in this publication are deposited in NCBI's

160 Gene Expression Omnibus and are accessible under the GEO Series accession number

161 GSE176405.

162

163 SUPPLEMENTAL TABLES

164 Table S1. DEGs from transcriptome analysis filtered on secreted factors from nasal scrapings  
165 from SARS-CoV-2 acute positive patients compared to negative patients

166 Table S2. DEGs from transcriptome analysis filtered on kallikreins from nasal scrapings from  
167 SARS-CoV-2 acute positive patients compared to negative patients

168 Table S3. DEGs from transcriptome analysis filtered on kinin-kallikrein-system members from  
169 nasal scrapings from SARS-CoV-2 acute positive patients compared to negative patients

170 Table S4. DEGs comparing SARS-CoV-2 + B2R antagonist versus SARS-CoV-2

171 Table S5. DEGs comparing SARS-CoV-2 + hydrocortisone (HC) versus SARS-CoV-2

172 Table S6. DEGs of antiviral epithelial response comparing SARS-CoV-2 versus medium

173 Table S7. DEGs of antiviral epithelial response comparing SARS-CoV-2 versus medium

174 Table S8. Gene expression of members of the acute-phase response comparing SARS-CoV-2  
175 versus medium

176 Table S9. Gene expression of members of RAS and KKS comparing SARS-CoV-2 versus  
177 medium

178 Table S10. Differentially expressed interleukins comparing SARS-CoV-2 versus medium

179 Table S11. Potential viral entry receptor DEGs comparing SARS-CoV-2 versus medium

180 Table S12. Toll-like receptor (TLR) DEGs comparing SARS-CoV-2 versus medium

181 Table S13. Chemokine DEGs comparing SARS-CoV-2 versus medium

182 Table S14. Gene expression of potential viral entry receptors comparing SARS-CoV-2 versus  
183 medium

184 Table S15. Membrane-bound receptor DEGs comparing SARS-CoV-2 + B2R antagonist versus  
185 SARS-CoV-2

186 Table S16. Membrane-bound receptor DEGs comparing SARS-CoV-2 + B2R antagonist versus  
187 SARS-CoV-2 ( $P \leq 0.05$ ;  $FC \geq 2.5$ )



188 Table S17. Interactions output of String network analysis of membrane-bound receptor DEGs  
189 comparing SARS-CoV-2 + B2R antagonist versus SARS-CoV-2

190 Table S18. Cellular process enrichment analysis output of String network analysis of  
191 membrane-bound receptor DEGs comparing SARS-CoV-2 + B2R antagonist versus SARS-  
192 CoV-2

193 Table S19. Membrane-bound cell surface receptor DEGs, upregulated in SARS-CoV-2 versus  
194 medium

195 Table S20. Cut set: Membrane-bound cell surface receptor DEGs, upregulated in SARS-CoV-  
196 2 versus medium and downregulated in SARS-CoV-2 + B2R antagonist versus SARS-CoV-2

197 Table S21. Reagents

198

## 199 SUPPLEMENTAL FIGURE LEGENDS

200 Figure S1. Epithelial response of primary NHBEs to SARS-CoV-2 infection.

201 Gene expression analysis of NHBEs after 24 hours of SARS-CoV-2 infection versus medium  
202 using microarray technology: A) Heat map of selected genes of the KKS and RAS are depicted  
203 independent of significance analysis. All entities are shown. Asterisks indicate significantly  
204 regulated genes ( $P < 0.05$ ) in SARS-CoV-2 compared to medium. Heat map of gene expression  
205 analysis of B) epithelium-derived interleukins, C) a selection of confirmed and potential SARS-  
206 CoV-2 entry receptors, D) Toll-like family members, E) factors involved in the immediate  
207 antiviral response of infected epithelial cells, and of E) chemokines. In B-F, only significantly  
208 regulated entities in SARS-CoV-2-infected versus uninfected NHBEs are shown. Color code  
209 indicates Log<sub>2</sub>-fold change from low (blue) through 0 (white) to high (red). Duplicate gene  
210 names indicate the abundance of two or more isoforms of the same gene in the analysis.

211

212 Figure S2.

213 A) Analysis of *TMPRSS2* gene expression by qPCR after 24 hours of pre-treatment of NHBES  
214 of 10 donors with/without 1 nM B<sub>2</sub>R antagonist, followed by SARS-CoV-2 inoculation for 24  
215 hours of NHBES. Results are depicted as median with range. B) *ACE2* gene expression analysis  
216 using qPCR after 24 hours of pre-treatment with/without 10 μM hydrocortisone (HC) followed  
217 by 24 hours of SARS-CoV-2 infection of NHBES. Results are depicted as median with range.  
218 For Figures S2A and B, statistical tests compared SARS-CoV-2-infected versus uninfected  
219 samples or B<sub>2</sub>R antagonist-treated versus untreated samples. C) Heat map of gene expression  
220 analysis of membrane-bound cell surface receptors included in pathway analysis in Figures  
221 4A,B, the were the highest downregulated upon pre-treatment with B<sub>2</sub>R antagonist during  
222 SARS-CoV-2 infection of NHBES are depicted. SARS-CoV-2 + B<sub>2</sub>R antagonist and SARS-  
223 CoV-2 are shown (FC≥2.5; P≤0.05). Color code indicates Log<sub>2</sub>-fold change from low (blue)  
224 through 0 (white) to high (red). Duplicate gene names indicate the abundance of two or more  
225 isoforms of the same gene in the analysis.  
226  
227

- 229 1. Zissler UM, Chaker AM, Effner R, et al. Interleukin-4 and interferon-gamma  
230 orchestrate an epithelial polarization in the airways. *Mucosal Immunol.* 2016;9(4):917-  
231 926.
- 232 2. Zissler UM, Jakwerth CA, Guerth FM, et al. Early IL-10 producing B-cells and  
233 coinciding Th/Tr17 shifts during three year grass-pollen AIT. *EBioMedicine.*  
234 2018;36:475-488.
- 235 3. Franceschini A, Lin J, von Mering C, Jensen LJ. SVD-phy: improved prediction of  
236 protein functional associations through singular value decomposition of phylogenetic  
237 profiles. *Bioinformatics.* 2016;32(7):1085-1087.
- 238 4. Franceschini A, Szklarczyk D, Frankild S, et al. STRING v9.1: protein-protein  
239 interaction networks, with increased coverage and integration. *Nucleic Acids Res.*  
240 2013;41(Database issue):D808-815.
- 241 5. Jensen LJ, Kuhn M, Stark M, et al. STRING 8--a global view on proteins and their  
242 functional interactions in 630 organisms. *Nucleic Acids Res.* 2009;37(Database  
243 issue):D412-416.
- 244 6. Snel B, Lehmann G, Bork P, Huynen MA. STRING: a web-server to retrieve and  
245 display the repeatedly occurring neighbourhood of a gene. *Nucleic Acids Res.*  
246 2000;28(18):3442-3444.
- 247 7. Szklarczyk D, Franceschini A, Kuhn M, et al. The STRING database in 2011: functional  
248 interaction networks of proteins, globally integrated and scored. *Nucleic Acids Res.*  
249 2011;39(Database issue):D561-568.
- 250 8. Szklarczyk D, Franceschini A, Wyder S, et al. STRING v10: protein-protein interaction  
251 networks, integrated over the tree of life. *Nucleic Acids Res.* 2015;43(Database  
252 issue):D447-452.
- 253 9. Szklarczyk D, Gable AL, Lyon D, et al. STRING v11: protein-protein association  
254 networks with increased coverage, supporting functional discovery in genome-wide  
255 experimental datasets. *Nucleic Acids Res.* 2019;47(D1):D607-D613.
- 256 10. Szklarczyk D, Morris JH, Cook H, et al. The STRING database in 2017: quality-  
257 controlled protein-protein association networks, made broadly accessible. *Nucleic Acids*  
258 *Res.* 2017;45(D1):D362-D368.
- 259 11. von Mering C, Huynen M, Jaeggi D, Schmidt S, Bork P, Snel B. STRING: a database  
260 of predicted functional associations between proteins. *Nucleic Acids Res.*  
261 2003;31(1):258-261.
- 262 12. von Mering C, Jensen LJ, Kuhn M, et al. STRING 7--recent developments in the  
263 integration and prediction of protein interactions. *Nucleic Acids Res.* 2007;35(Database  
264 issue):D358-362.
- 265 13. von Mering C, Jensen LJ, Snel B, et al. STRING: known and predicted protein-protein  
266 associations, integrated and transferred across organisms. *Nucleic Acids Res.*  
267 2005;33(Database issue):D433-437.
- 268
