# Supplementary material for: Early Reduction of SARS-CoV-2 Replication in Bronchial Epithelium by Kinin B2 Receptor Antagonism
Source: bioRxiv or medRxiv preprint supplement (doi:10.1101/2021.08.13.21262037), 2021-08-18

SUPPLEMENTAL FIGURE S1

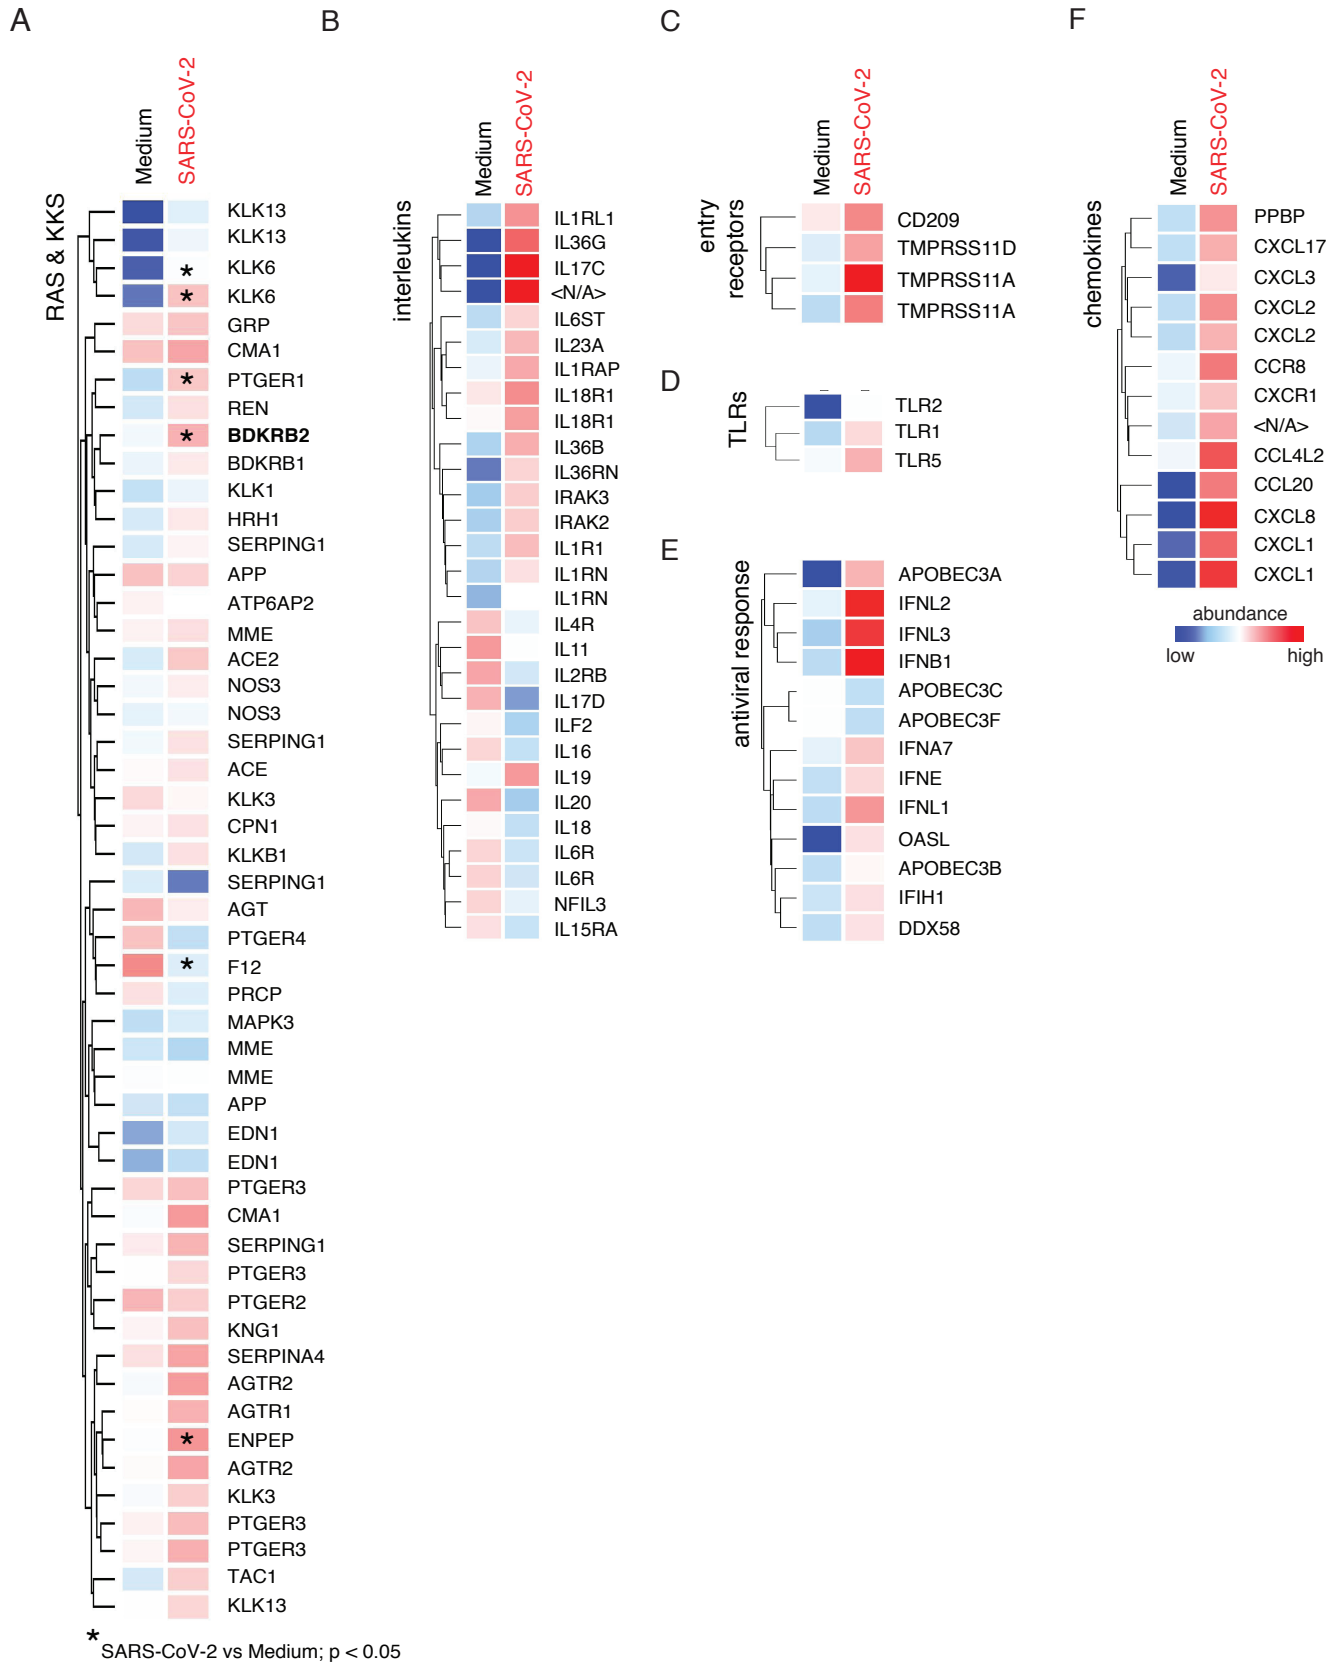

SUPPLEMENTAL FIGURE S2

A - TMPRSS2 mRNA level  
treatment pre-infection

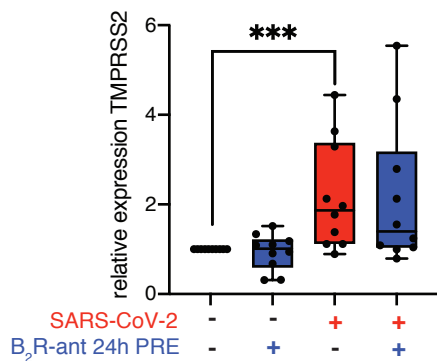

B - ACE2 mRNA level  
HC treatment pre-infection

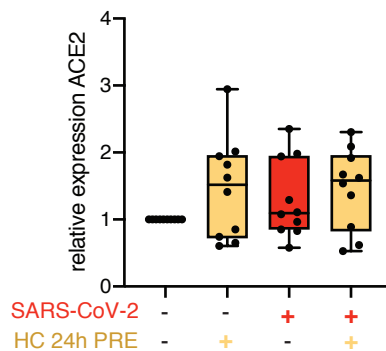

C - Membrane-bound receptors  
DEGs SARS-CoV-2 + B<sub>2</sub>R-ant vs SARS-CoV-2

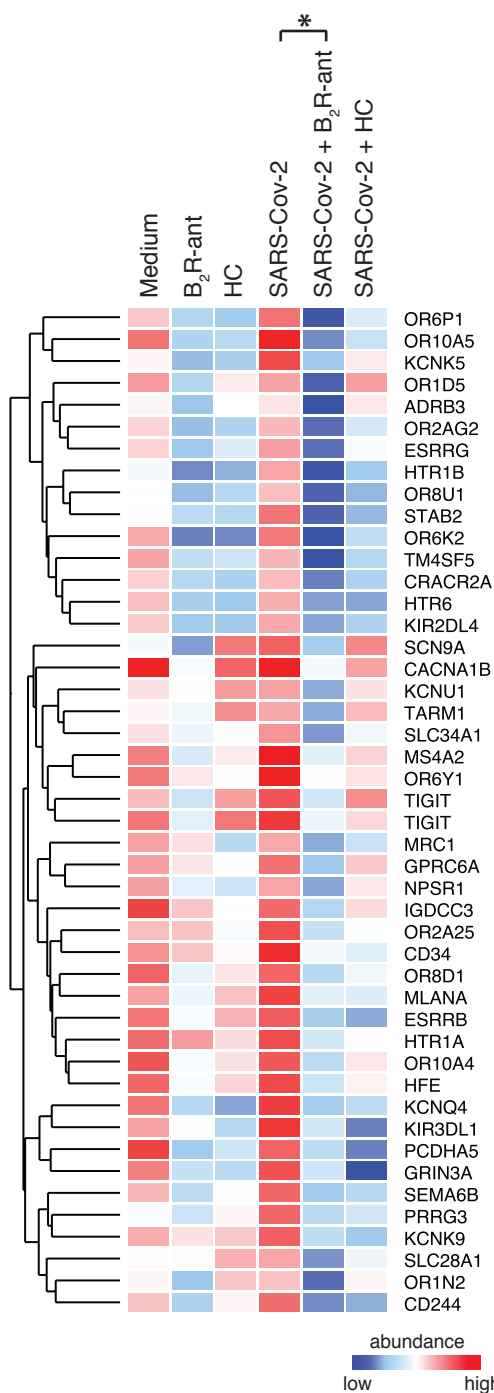

Supplement: Supplementary file [file media-2.pdf]
