# Supplementary material for: Early Reduction of SARS-CoV-2 Replication in Bronchial Epithelium by Kinin B2 Receptor Antagonism
Source: bioRxiv or medRxiv preprint supplement (doi:10.1101/2021.08.13.21262037), 2021-08-18
Supplement: Supplementary file [file media-3.pdf]

**Supplemental Table S1.** DEGs from transcriptome analysis filtered on secreted factors from nasal scrapings from SARS-CoV-2 acute positive patients compared to negative patients

| ProbeName     | p ([pos acute] | Regulation ([ | FC ([pos acute] | Log FC ([pos | GeneSymbol | Description                                                                                                                                             |
|---------------|----------------|---------------|-----------------|--------------|------------|---------------------------------------------------------------------------------------------------------------------------------------------------------|
| A_23_P252981  | 0,34020385     | up            | 1,1672416       | 0,22310317   | ACE2       | Homo sapiens angiotensin I converting enzyme 2 (ACE2), mRNA [NM_021804]                                                                                 |
| A_33_P3411907 | 0,23858786     | up            | 1,3503011       | 0,43328118   | FGF5       | Homo sapiens fibroblast growth factor 5 (FGF5), transcript variant 2, mRNA [NM_033143]                                                                  |
| A_33_P3525263 | 0,60033906     | up            | 1,5155119       | 0,5998051    | A2ML1      | Homo sapiens alpha-2-macroglobulin-like 1 (A2ML1), transcript variant 1, mRNA [NM_144670]                                                               |
| A_23_P346093  | 0,08312471     | up            | 1,5961888       | 0,6746313    | TMC8       | Homo sapiens transmembrane channel-like 8 (TMC8), mRNA [NM_152468]                                                                                      |
| A_23_P141802  | 0,6342188      | up            | 1,1596125       | 0,21364284   | SERPINB7   | Homo sapiens serpin peptidase inhibitor, clade B (ovalbumin), member 7 (SERPINB7), transcript variant 2, mRNA [NM_001040147]                            |
| A_23_P114232  | 0,8563269      | down          | -1,0283316      | -0,0403056   | PRDX4      | Homo sapiens peroxiredoxin 4 (PRDX4), mRNA [NM_006406]                                                                                                  |
| A_23_P12128   | 0,21435596     | up            | 1,2048411       | 0,26884294   | TSHB       | Homo sapiens thyroid stimulating hormone, beta (TSHB), transcript variant 1, mRNA [NM_000549]                                                           |
| A_23_P210515  | 0,31126252     | down          | -1,1782407      | -0,2366342   | NCOA5      | Homo sapiens nuclear receptor coactivator 5 (NCOA5), mRNA [NM_020967]                                                                                   |
| A_23_P89431   | 0,6829328      | up            | 1,2285764       | 0,2969876    | CCL2       | Homo sapiens chemokine (C-C motif) ligand 2 (CCL2), mRNA [NM_002982]                                                                                    |
| A_23_P154643  | 0,18161069     | up            | 1,533928        | 0,6172308    | BMP7       | Homo sapiens bone morphogenetic protein 7 (BMP7), mRNA [NM_001719]                                                                                      |
| A_23_P38505   | 0,45073867     | up            | 1,1462373       | 0,19690569   | CXCL16     | Homo sapiens chemokine (C-X-C motif) ligand 16 (CXCL16), transcript variant 1, mRNA [NM_022059]                                                         |
| A_33_P3350863 | 0,77439594     | down          | -1,0995045      | -0,1368535   | RETN       | Homo sapiens resistin (RETN), transcript variant 1, mRNA [NM_020415]                                                                                    |
| A_23_P214821  | 0,0720521      | up            | 2,3768287       | 1,2490379    | EDN1       | Homo sapiens endothelin 1 (EDN1), transcript variant 1, mRNA [NM_001955]                                                                                |
| A_23_P98382   | 0,8317378      | down          | -1,0278152      | -0,0395809   | TIMM8B     | Homo sapiens translocase of inner mitochondrial membrane 8 homolog B (yeast) (TIMM8B), transcript variant 1, mRNA [NM_012459]                           |
| A_33_P3382924 | 0,26157108     | up            | 2,159817        | 1,1109091    | SPARC      | Homo sapiens secreted protein, acidic, cysteine-rich (osteonectin) (SPARC), mRNA [NM_003118]                                                            |
| A_24_P90900   | 0,62406707     | up            | 1,1422311       | 0,19185458   | CTRL       | Homo sapiens chymotrypsin-like (CTRL), mRNA [NM_001907]                                                                                                 |
| A_23_P94533   | 0,33538678     | up            | 1,2000083       | 0,26304436   | CTSL       | Homo sapiens cathepsin L (CTSL), transcript variant 1, mRNA [NM_001912]                                                                                 |
| A_24_P55148   | 0,6589927      | down          | -1,093799       | -0,1293476   | HIST1H2BJ  | Homo sapiens histone cluster 1, H2bj (HIST1H2BJ), mRNA [NM_021058]                                                                                      |
| A_23_P11774   | 0,5802634      | down          | -1,0961056      | -0,1323868   | UTP11L     | Homo sapiens UTP11-like, U3 small nucleolar ribonucleoprotein (yeast) (UTP11L), mRNA [NM_016037]                                                        |
| A_33_P3246833 | 0,2517003      | up            | 2,0968657       | 1,0682344    | IL1RN      | Homo sapiens interleukin 1 receptor antagonist (IL1RN), transcript variant 4, mRNA [NM_173843]                                                          |
| A_23_P114057  | 0,5955839      | down          | -1,1266555      | -0,1720464   | SEMA4C     | Homo sapiens sema domain, immunoglobulin domain (Ig), transmembrane domain (TM) and short cytoplasmic domain, (semaphorin) 4C (SEMA4C), mRNA [NM_01777] |
| A_23_P301846  | 0,07293202     | up            | 1,5677545       | 0,64869964   | CALCA      | Homo sapiens calcitonin-related polypeptide alpha (CALCA), transcript variant 2, mRNA [NM_001033952]                                                    |
| A_23_P218675  | 0,07808613     | up            | 1,6668886       | 0,7371577    | WFDC2      | Homo sapiens WAP four-disulfide core domain 2 (WFDC2), mRNA [NM_006103]                                                                                 |
| A_24_P122137  | 0,28342992     | up            | 1,3023006       | 0,38106245   | LIF        | Homo sapiens leukemia inhibitory factor (LIF), transcript variant 1, mRNA [NM_002309]                                                                   |
| A_24_P62783   | 0,37532657     | up            | 1,3871528       | 0,4721267    | FABP3      | Homo sapiens fatty acid binding protein 3, muscle and heart (FABP3), mRNA [NM_004102]                                                                   |
| A_23_P214079  | 0,30000716     | up            | 2,1004653       | 1,070709     | SPINK1     | Homo sapiens serine peptidase inhibitor, Kazal type 1 (SPINK1), mRNA [NM_003122]                                                                        |
| A_23_P88626   | 0,3222333      | down          | -2,0550373      | -1,0391645   | ANPEP      | Homo sapiens alanyl (membrane) aminopeptidase (ANPEP), mRNA [NM_001150]                                                                                 |
| A_23_P258190  | 0,5863842      | down          | -1,3434343      | -0,4259258   | AKR1B1     | Homo sapiens aldo-keto reductase family 1, member B1 (aldose reductase) (AKR1B1), mRNA [NM_001628]                                                      |
| A_23_P1594    | 0,2955662      | up            | 1,1927941       | 0,254345     | VEGFB      | Homo sapiens vascular endothelial growth factor B (VEGFB), transcript variant VEGFB-186, mRNA [NM_003377]                                               |
| A_23_P113393  | 0,0251484      | up            | 1,5995178       | 0,67763704   | APLN       | Homo sapiens apelin (APLN), mRNA [NM_017413]                                                                                                            |
| A_23_P7313    | 0,00349406     | up            | 10,502982       | 3,3927271    | SPP1       | Homo sapiens secreted phosphoprotein 1 (SPP1), transcript variant 1, mRNA [NM_001040058]                                                                |
| A_32_P170749  | 0,8960107      | up            | 1,0255061       | 0,03633613   | STAG3      | Homo sapiens stromal antigen 3 (STAG3), transcript variant 4, mRNA [NM_001282718]                                                                       |
| A_23_P113111  | 0,10926139     | down          | -2,7224672      | -1,4449147   | AR         | Homo sapiens androgen receptor (AR), transcript variant 1, mRNA [NM_000044]                                                                             |
| A_24_P122403  | 0,28822765     | down          | -1,1593254      | -0,2132855   | TCEB3      | Homo sapiens transcription elongation factor B (SIII), polypeptide 3 (110kDa, elongin A) (TCEB3), mRNA [NM_003198]                                      |
| A_23_P153964  | 0,20688777     | down          | -3,0889125      | -1,6270989   | INHBB      | Homo sapiens inhibin, beta B (INHBB), mRNA [NM_002193]                                                                                                  |
| A_23_P122216  | 0,15532492     | down          | -1,3783735      | -0,4629669   | LOX        | Homo sapiens lysyl oxidase (LOX), transcript variant 1, mRNA [NM_002317]                                                                                |
| A_33_P3210379 | 0,0541494      | down          | -1,5626283      | -0,6439746   | SCGB3A1    | Homo sapiens secretoglobulin, family 3A, member 1 (SCGB3A1), mRNA [NM_052863]                                                                           |
| A_33_P3215640 | 0,0322807      | down          | -2,4941149      | -1,3185279   | PI16       | Homo sapiens peptidase inhibitor 16 (PI16), transcript variant 1, mRNA [NM_153370]                                                                      |
| A_23_P106661  | 0,26954055     | up            | 1,4148043       | 0,50060254   | CMTM1      | Homo sapiens CKLF-like MARVEL transmembrane domain containing 1 (CMTM1), transcript variant 17, mRNA [NM_052999]                                        |
| A_23_P101505  | 0,16285726     | up            | 1,7061496       | 0,77074414   | KLK11      | Homo sapiens kallikrein-related peptidase 11 (KLK11), transcript variant 2, mRNA [NM_144947]                                                            |
| A_23_P122924  | 0,1506425      | up            | 2,1057057       | 1,0743039    | INHBA      | Homo sapiens inhibin, beta A (INHBA), mRNA [NM_002192]                                                                                                  |
| A_23_P369237  | 0,87318844     | up            | 1,0286412       | 0,04073988   | ADIPOQ     | Homo sapiens adiponectin, C1Q and collagen domain containing (ADIPOQ), transcript variant 2, mRNA [NM_004797]                                           |
| A_23_P204847  | 0,39333293     | up            | 1,3972312       | 0,48257077   | LCP1       | Homo sapiens lymphocyte cytosolic protein 1 (L-plastin) (LCP1), mRNA [NM_002298]                                                                        |
| A_23_P24104   | 0,8725616      | up            | 1,0661993       | 0,09247714   | PLAU       | Homo sapiens plasminogen activator, urokinase (PLAU), transcript variant 1, mRNA [NM_002658]                                                            |
| A_23_P88106   | 0,7455171      | down          | -1,0779434      | -0,1082815   | MCF2L      | Homo sapiens MCF.2 cell line derived transforming sequence-like (MCF2L), transcript variant 2, mRNA [NM_024979]                                         |
| A_33_P3346826 | 0,2416095      | up            | 1,4380172       | 0,524081     | IL32       | Homo sapiens interleukin 32 (IL32), transcript variant 4, mRNA [NM_001012633]                                                                           |
| A_23_P3259092 | 0,7082634      | down          | -1,100957       | -0,1387582   | FKTN       | Homo sapiens fukutin (FKTN), transcript variant 1, mRNA [NM_001079802]                                                                                  |
| A_23_P118061  | 0,4154726      | down          | -1,1452136      | -0,1956167   | CKLF       | Homo sapiens chemokine-like factor (CKLF), transcript variant 4, mRNA [NM_181641]                                                                       |
| A_24_P844984  | 0,8423595      | up            | 1,1359301       | 0,18387401   | PIGR       | Homo sapiens polymeric immunoglobulin receptor (PIGR), mRNA [NM_002644]                                                                                 |
| A_23_P13907   | 0,3633783      | up            | 1,4200653       | 0,50595725   | IGF1       | Homo sapiens insulin-like growth factor 1 (somatomedin C) (IGF1), transcript variant 4, mRNA [NM_000618]                                                |
| A_33_P3413701 | 0,0714303      | down          | -1,766756       | -0,8211029   | ERAP1      | Homo sapiens endoplasmic reticulum aminopeptidase 1 (ERAP1), transcript variant 2, mRNA [NM_001040458]                                                  |

|               |            |      |            |            |           |                                                                                                                                                        |
|---------------|------------|------|------------|------------|-----------|--------------------------------------------------------------------------------------------------------------------------------------------------------|
| A_24_P382579  | 0,54189306 | up   | 1,0794927  | 0,11035347 | OXT       | Homo sapiens oxytocin/neurophysin I prepropeptide (OXT), mRNA [NM_000915]                                                                              |
| A_23_P218111  | 0,5657635  | up   | 1,2052906  | 0,26938096 | SERPINA1  | Homo sapiens serpin peptidase inhibitor, clade A (alpha-1 antitrypsinase, antitrypsin), member 1 (SERPINA1), transcript variant 2, mRNA [NM_001002236] |
| A_23_P40240   | 0,8870209  | down | -1,032386  | -0,0459824 | CTSZ      | Homo sapiens cathepsin Z (CTSZ), mRNA [NM_001336]                                                                                                      |
| A_23_P104798  | 0,39669368 | down | -1,2095851 | -0,2745122 | IL18      | Homo sapiens interleukin 18 (IL18), transcript variant 1, mRNA [NM_001562]                                                                             |
| A_23_P157865  | 0,1928983  | down | -1,8881718 | -0,91699   | TNC       | Homo sapiens tenascin C (TNC), mRNA [NM_002160]                                                                                                        |
| A_23_P127948  | 0,01269069 | up   | 3,4127927  | 1,7709527  | ADM       | Homo sapiens adrenomedullin (ADM), mRNA [NM_001124]                                                                                                    |
| A_23_P215790  | 0,5866154  | down | -1,1153003 | -0,1574322 | EGFR      | Homo sapiens epidermal growth factor receptor (EGFR), transcript variant 1, mRNA [NM_005228]                                                           |
| A_23_P73114   | 0,69846743 | down | -1,2543359 | -0,3269237 | PROS1     | Homo sapiens protein S (alpha) (PROS1), mRNA [NM_000313]                                                                                               |
| A_23_P86021   | 0,89991564 | down | -1,0371997 | -0,0526937 | SELENBP1  | Homo sapiens selenium binding protein 1 (SELENBP1), transcript variant 1, mRNA [NM_003944]                                                             |
| A_23_P330070  | 0,83532095 | up   | 1,06563    | 0,09170654 | TFPI      | Homo sapiens tissue factor pathway inhibitor (lipoprotein-associated coagulation inhibitor) (TFPI), transcript variant 2, mRNA [NM_001032281]          |
| A_23_P410507  | 0,13451456 | up   | 1,2328987  | 0,3020543  | PSPN      | Homo sapiens persephin (PSPN), mRNA [NM_004158]                                                                                                        |
| A_32_P56392   | 0,68302476 | down | -1,0766046 | -0,1064885 | RBMX      | Homo sapiens RNA binding motif protein, X-linked (RBMX), transcript variant 1, mRNA [NM_002139]                                                        |
| A_33_P3244843 | 0,59043044 | down | -1,0700521 | -0,0976811 | PRKAG3    | Homo sapiens protein kinase, AMP-activated, gamma 3 non-catalytic subunit (PRKAG3), mRNA [NM_017431]                                                   |
| A_32_P75094   | 0,10787725 | down | -1,464529  | -0,5504368 | AIFM2     | Homo sapiens apoptosis-inducing factor, mitochondrion-associated, 2 (AIFM2), transcript variant 2, mRNA [NM_032797]                                    |
| A_23_P94501   | 0,6399172  | up   | 1,1158763  | 0,15817712 | ANXA1     | Homo sapiens annexin A1 (ANXA1), mRNA [NM_000700]                                                                                                      |
| A_23_P340848  | 0,14594871 | up   | 1,7228177  | 0,78477    | PTGIR     | Homo sapiens prostaglandin I2 (prostacyclin) receptor (IP) (PTGIR), mRNA [NM_000960]                                                                   |
| A_23_P41114   | 0,15429671 | up   | 2,3939152  | 1,259372   | CSTA      | Homo sapiens cystatin A (stefin A) (CSTA), mRNA [NM_005213]                                                                                            |
| A_33_P3290709 | 0,5922341  | down | -1,1187489 | -0,1618863 | EGFL6     | Homo sapiens EGF-like-domain, multiple 6 (EGFL6), transcript variant 2, mRNA [NM_001167890]                                                            |
| A_32_P193646  | 0,32866108 | down | -1,1979955 | -0,2606225 | RBMX      | Homo sapiens RNA binding motif protein, X-linked (RBMX), transcript variant 1, mRNA [NM_002139]                                                        |
| A_23_P430411  | 0,5226412  | up   | 1,1144391  | 0,15631782 | ITGB2     | integrin, beta 2 (complement component 3 receptor 3 and 4 subunit) [Source:HGNC Symbol;Acc:HGNC:6155] [ENST00000610622]                                |
| A_23_P48455   | 0,1589503  | up   | 1,2727822  | 0,34798557 | AMN       | Homo sapiens amnion associated transmembrane protein (AMN), mRNA [NM_030943]                                                                           |
| A_23_P405129  | 0,4559726  | up   | 1,16988    | 0,22636059 | LTBP2     | Homo sapiens latent transforming growth factor beta binding protein 2 (LTBP2), mRNA [NM_000428]                                                        |
| A_23_P121533  | 0,04362308 | up   | 2,347726   | 1,2312641  | SPON2     | Homo sapiens spondin 2, extracellular matrix protein (SPON2), transcript variant 1, mRNA [NM_012445]                                                   |
| A_24_P416645  | 0,07144744 | up   | 6,230724   | 2,6393998  | KLK13     | Homo sapiens kallikrein-related peptidase 13 (KLK13), mRNA [NM_015596]                                                                                 |
| A_23_P113701  | 0,7615045  | down | -1,0813243 | -0,1127993 | PDGFA     | Homo sapiens platelet-derived growth factor alpha polypeptide (PDGFA), transcript variant 1, mRNA [NM_002607]                                          |
| A_23_P135769  | 0,17370348 | up   | 1,265171   | 0,33933243 | ACTB      | Homo sapiens actin, beta (ACTB), mRNA [NM_001101]                                                                                                      |
| A_23_P114084  | 0,84269136 | up   | 1,034021   | 0,04826551 | PHEX      | Homo sapiens phosphate regulating endopeptidase homolog, X-linked (PHEX), transcript variant 1, mRNA [NM_000444]                                       |
| A_23_P167997  | 0,8547732  | down | -1,054214  | -0,0761678 | HIST1H2BG | Homo sapiens histone cluster 1, H2bg (HIST1H2BG), mRNA [NM_003518]                                                                                     |
| A_32_P173662  | 0,3632822  | down | -1,4235327 | -0,5094757 | CRISP2    | Homo sapiens cysteine-rich secretory protein 2 (CRISP2), transcript variant 1, mRNA [NM_003296]                                                        |
| A_23_P10121   | 0,08714049 | up   | 1,9815224  | 0,9866093  | SFRP1     | Homo sapiens secreted frizzled-related protein 1 (SFRP1), mRNA [NM_003012]                                                                             |
| A_23_P114626  | 0,5678618  | down | -1,2241974 | -0,2918362 | SERPINC1  | Homo sapiens serpin peptidase inhibitor, clade C (antithrombin), member 1 (SERPINC1), mRNA [NM_000488]                                                 |
| A_33_P3270863 | 0,436978   | up   | 1,249023   | 0,3208     | XDH       | Homo sapiens xanthine dehydrogenase (XDH), mRNA [NM_000379]                                                                                            |
| A_23_P101655  | 0,42922792 | up   | 1,143      | 0,1928254  | ACTN4     | Homo sapiens actinin, alpha 4 (ACTN4), mRNA [NM_004924]                                                                                                |
| A_23_P19590   | 0,44284067 | down | -1,1745548 | -0,2321141 | EZR       | Homo sapiens ezrin (EZR), transcript variant 1, mRNA [NM_003379]                                                                                       |
| A_23_P115190  | 0,6717296  | up   | 1,0715784  | 0,09973738 | NGF       | Homo sapiens nerve growth factor (beta polypeptide) (NGF), mRNA [NM_002506]                                                                            |
| A_23_P90130   | 0,20918906 | up   | 1,2444544  | 0,31551334 | NAPSA     | Homo sapiens napsin A aspartic peptidase (NAPSA), mRNA [NM_004851]                                                                                     |
| A_33_P3245228 | 0,79901814 | down | -1,3290297 | -0,4103733 | BPIFA1    | Homo sapiens BPI fold containing family A, member 1 (BPIFA1), transcript variant 2, mRNA [NM_130852]                                                   |
| A_23_P212617  | 0,6269167  | down | -1,1137285 | -0,1553976 | TFRC      | Homo sapiens transferrin receptor (TFRC), transcript variant 1, mRNA [NM_003234]                                                                       |
| A_23_P82296   | 0,83918583 | down | -1,0265962 | -0,0378688 | GNB2      | Homo sapiens guanine nucleotide binding protein (G protein), beta polypeptide 2 (GNB2), mRNA [NM_005273]                                               |
| A_23_P40956   | 0,6868508  | down | -1,0738301 | -0,1027658 | GHRL      | Homo sapiens ghrelin/obestatin prepropeptide (GHRL), transcript variant 1, mRNA [NM_016362]                                                            |
| A_23_P94230   | 0,3508384  | down | -1,2771966 | -0,3529807 | LY96      | Homo sapiens lymphocyte antigen 96 (LY96), transcript variant 1, mRNA [NM_015364]                                                                      |
| A_23_P377299  | 0,16478647 | up   | 1,2441227  | 0,31512883 | ECE2      | Homo sapiens endothelin converting enzyme 2 (ECE2), transcript variant 1, mRNA [NM_014693]                                                             |
| A_23_P161998  | 0,5103848  | down | -1,2376281 | -0,3075779 | HPX       | Homo sapiens hemopexin (HPX), mRNA [NM_000613]                                                                                                         |
| A_23_P215549  | 0,48103628 | up   | 1,3168023  | 0,39703873 | PON3      | Homo sapiens paraoxonase 3 (PON3), mRNA [NM_000940]                                                                                                    |
| A_23_P117298  | 0,11668842 | up   | 1,3060594  | 0,38522047 | F7        | Homo sapiens coagulation factor VII (serum prothrombin conversion accelerator) (F7), transcript variant 1, mRNA [NM_000131]                            |
| A_23_P383118  | 0,22161703 | up   | 1,2648332  | 0,33894715 | ZSWIM5    | Homo sapiens zinc finger, SWIM-type containing 5 (ZSWIM5), mRNA [NM_020883]                                                                            |
| A_23_P216023  | 0,3785029  | up   | 1,4029454  | 0,48845884 | ANGPT1    | Homo sapiens angiotensinogen 1 (ANGPT1), transcript variant 1, mRNA [NM_001146]                                                                        |
| A_23_P19663   | 0,15996595 | down | -4,041438  | -2,0148687 | CTGF      | Homo sapiens connective tissue growth factor (CTGF), mRNA [NM_001901]                                                                                  |
| A_33_P3292854 | 0,22362651 | up   | 1,2267722  | 0,29486737 | CALR      | Homo sapiens calreticulin (CALR), mRNA [NM_004343]                                                                                                     |
| A_33_P3212555 | 0,58404255 | down | -1,3213733 | -0,4020381 | PROS1     | Homo sapiens protein S (alpha) (PROS1), mRNA [NM_000313]                                                                                               |
| A_32_P466514  | 0,32102555 | up   | 1,1794496  | 0,23811372 | IRF2BPL   | Homo sapiens interferon regulatory factor 2 binding protein-like (IRF2BPL), mRNA [NM_024496]                                                           |
| A_24_P106542  | 0,49028128 | up   | 1,1820017  | 0,24123211 | RSP03     | Homo sapiens R-spondin 3 (RSP03), mRNA [NM_032784]                                                                                                     |
| A_24_P14464   | 0,18195735 | up   | 1,5892023  | 0,6683028  | WFDC2     | Homo sapiens WAP four-disulfide core domain 2 (WFDC2), mRNA [NM_006103]                                                                                |
| A_23_P102117  | 0,6226368  | down | -1,3027637 | -0,3815754 | WNT10A    | Homo sapiens wingless-type MMTV integration site family, member 10A (WNT10A), mRNA [NM_025216]                                                         |
| A_23_P52761   | 0,17681557 | up   | 2,1163561  | 1,0815824  | MMP7      | Homo sapiens matrix metalloproteinase 7 (matrilysin, uterine) (MMP7), mRNA [NM_002423]                                                                 |

|               |            |      |            |            |           |                                                                                                                                                                  |
|---------------|------------|------|------------|------------|-----------|------------------------------------------------------------------------------------------------------------------------------------------------------------------|
| A_23_P71530   | 0,42888758 | down | -1,2236215 | -0,2911573 | TNFRSF11B | Homo sapiens tumor necrosis factor receptor superfamily, member 11b (TNFRSF11B), mRNA [NM_002546]                                                                |
| A_23_P110234  | 0,04974663 | down | -1,3478093 | -0,4306164 | CSN1S1    | Homo sapiens casein alpha s1 (CSN1S1), transcript variant 1, mRNA [NM_001890]                                                                                    |
| A_24_P141214  | 0,12606637 | down | -1,6287051 | -0,7037255 | STOM      | Homo sapiens stomatin (STOM), transcript variant 2, mRNA [NM_198194]                                                                                             |
| A_23_P120316  | 0,33991688 | down | -1,3771346 | -0,4616695 | MTHFD2    | Homo sapiens methylenetetrahydrofolate dehydrogenase (NADP+ dependent) 2, methylenetetrahydrofolate cyclohydrolase (MTHFD2), transcript variant 1, mRNA [NM_C    |
| A_23_P121253  | 0,06613135 | up   | 1,4319932  | 0,5180247  | TNFSF10   | Homo sapiens tumor necrosis factor (ligand) superfamily, member 10 (TNFSF10), transcript variant 1, mRNA [NM_003810]                                             |
| A_23_P337800  | 0,7839056  | up   | 1,06622    | 0,09250521 | IFNL1     | Homo sapiens interferon, lambda 1 (IFNL1), mRNA [NM_172140]                                                                                                      |
| A_23_P370434  | 0,31468028 | down | -1,1833092 | -0,2428271 | C1QBP     | Homo sapiens complement component 1, q subcomponent binding protein (C1QBP), mRNA [NM_001212]                                                                    |
| A_33_P3375934 | 0,57824004 | up   | 1,0929403  | 0,12821464 | NAMPT     | Homo sapiens nicotinamide phosphoribosyltransferase (NAMPT), mRNA [NM_005746]                                                                                    |
| A_23_P122068  | 0,31232464 | up   | 1,1948788  | 0,2568643  | C1QTNF3   | Homo sapiens C1q and tumor necrosis factor related protein 3 (C1QTNF3), transcript variant 2, mRNA [NM_181435]                                                   |
| A_33_P3237150 | 0,1257997  | up   | 2,224309   | 1,1533571  | BMP2      | Homo sapiens bone morphogenetic protein 2 (BMP2), mRNA [NM_001200]                                                                                               |
| A_23_P78771   | 0,27773327 | up   | 1,1640888  | 0,21920116 | NUCB1     | Homo sapiens nucleobindin 1 (NUCB1), mRNA [NM_006184]                                                                                                            |
| A_24_P360269  | 0,64975023 | up   | 1,1053336  | 0,14448181 | RNASET2   | Homo sapiens ribonuclease T2 (RNASET2), mRNA [NM_003730]                                                                                                         |
| A_23_P202658  | 0,5021522  | up   | 1,1170897  | 0,1597451  | GSTP1     | Homo sapiens glutathione S-transferase pi 1 (GSTP1), mRNA [NM_000852]                                                                                            |
| A_24_P239177  | 0,05825152 | up   | 1,7636298  | 0,8185477  | MUC4      | Homo sapiens mucin 4, cell surface associated (MUC4), transcript variant 1, mRNA [NM_018406]                                                                     |
| A_24_P870620  | 0,0525393  | down | -3,0150187 | -1,5921669 | PTN       | Homo sapiens pleiotrophin (PTN), mRNA [NM_002825]                                                                                                                |
| A_23_P101131  | 0,12604871 | up   | 1,2785679  | 0,35452878 | GRP       | Homo sapiens gastrin-releasing peptide (GRP), transcript variant 1, mRNA [NM_002091]                                                                             |
| A_23_P203023  | 0,13577837 | down | -1,3265326 | -0,4076601 | RDX       | Homo sapiens radixin (RDX), transcript variant 3, mRNA [NM_002906]                                                                                               |
| A_23_P39034   | 0,35876042 | up   | 1,1656907  | 0,22118498 | SMARCA4   | Homo sapiens SWI/SNF related, matrix associated, actin dependent regulator of chromatin, subfamily a, member 4 (SMARCA4), transcript variant 3, mRNA [NM_003072] |
| A_33_P3354940 | 0,14443554 | up   | 1,2737762  | 0,3491118  | CSF1      | Homo sapiens colony stimulating factor 1 (macrophage) (CSF1), transcript variant 1, mRNA [NM_000757]                                                             |
| A_23_P115261  | 0,87652117 | up   | 1,0767058  | 0,10662412 | AGT       | Homo sapiens angiotensinogen (serpin peptidase inhibitor, clade A, member 8) (AGT), mRNA [NM_000029]                                                             |
| A_33_P3397763 | 0,2873617  | up   | 1,7145268  | 0,7778104  | TNFSF9    | Homo sapiens tumor necrosis factor (ligand) superfamily, member 9 (TNFSF9), mRNA [NM_003811]                                                                     |
| A_23_P983     | 0,19014396 | up   | 1,1931828  | 0,2548151  | PRDX6     | Homo sapiens peroxiredoxin 6 (PRDX6), mRNA [NM_004905]                                                                                                           |
| A_33_P3329088 | 0,01875629 | up   | 1,5881642  | 0,66736007 | PRSS8     | Homo sapiens protease, serine, 8 (PRSS8), mRNA [NM_002773]                                                                                                       |
| A_33_P3394297 | 0,18468376 | up   | 1,3702301  | 0,45441815 | THNSL2    | Homo sapiens threonine synthase-like 2 (S. cerevisiae) (THNSL2), transcript variant 2, mRNA [NM_001244676]                                                       |
| A_23_P411145  | 0,21351777 | up   | 1,3822936  | 0,46706405 | FAM3D     | Homo sapiens family with sequence similarity 3, member D (FAM3D), mRNA [NM_138805]                                                                               |
| A_23_P31240   | 0,40469095 | up   | 1,1493171  | 0,20077695 | GAL3ST4   | Homo sapiens galactose-3-O-sulfotransferase 4 (GAL3ST4), mRNA [NM_024637]                                                                                        |
| A_23_P12989   | 0,32762378 | down | -1,2933294 | -0,3710897 | PRDX5     | Homo sapiens peroxiredoxin 5 (PRDX5), transcript variant 1, mRNA [NM_012094]                                                                                     |
| A_23_P429950  | 0,0592426  | down | -2,8164542 | -1,49388   | KAL1      | Homo sapiens Kallmann syndrome 1 sequence (KAL1), mRNA [NM_000216]                                                                                               |
| A_33_P3332248 | 0,42634466 | up   | 1,1473662  | 0,19832587 | ADRA1A    | adrenoceptor alpha 1A [Source:HGNC Symbol;Acc:HGNC:277] [ENST00000380573]                                                                                        |
| A_23_P208302  | 0,02219906 | up   | 1,9207166  | 0,94164467 | APOC2     | Homo sapiens apolipoprotein C-II (APOC2), mRNA [NM_000483]                                                                                                       |
| A_23_P101054  | 0,06361125 | up   | 2,5241742  | 1,3358115  | KRT34     | Homo sapiens keratin 34, type I (KRT34), mRNA [NM_021013]                                                                                                        |
| A_23_P144071  | 0,66565204 | down | -1,2218152 | -0,2890261 | COL7A1    | Homo sapiens collagen, type VII, alpha 1 (COL7A1), mRNA [NM_000094]                                                                                              |
| A_23_P32500   | 0,07737384 | up   | 1,56051    | 0,6420176  | STAB1     | Homo sapiens stabilin 1 (STAB1), mRNA [NM_015136]                                                                                                                |
| A_23_P57829   | 0,36515465 | up   | 1,1950673  | 0,25709185 | CPNE9     | Homo sapiens copine family member IX (CPNE9), mRNA [NM_153635]                                                                                                   |
| A_23_P139912  | 0,28756794 | up   | 2,499771   | 1,321796   | IGFBP6    | Homo sapiens insulin-like growth factor binding protein 6 (IGFBP6), mRNA [NM_002178]                                                                             |
| A_24_P108451  | 0,29746452 | up   | 1,1720688  | 0,2290573  | GPI       | Homo sapiens glucose-6-phosphate isomerase (GPI), transcript variant 2, mRNA [NM_000175]                                                                         |
| A_23_P111583  | 0,68210864 | down | -1,1558864 | -0,2089996 | CD36      | Homo sapiens CD36 molecule (thrombospondin receptor) (CD36), transcript variant 2, mRNA [NM_001001547]                                                           |
| A_23_P78099   | 0,19795217 | up   | 1,3143129  | 0,3943088  | VTN       | Homo sapiens vitronectin (VTN), mRNA [NM_000638]                                                                                                                 |
| A_23_P71037   | 0,0891633  | up   | 1,5560391  | 0,6378783  | IL6       | Homo sapiens interleukin 6 (IL6), mRNA [NM_000600]                                                                                                               |
| A_33_P3246829 | 0,3360464  | up   | 1,829677   | 0,87158895 | IL1RN     | Homo sapiens interleukin 1 receptor antagonist (IL1RN), transcript variant 4, mRNA [NM_173843]                                                                   |
| A_33_P3229032 | 0,13520949 | up   | 1,4541255  | 0,5401518  | CLEC11A   | Homo sapiens C-type lectin domain family 11, member A (CLEC11A), mRNA [NM_002975]                                                                                |
| A_23_P259207  | 0,3468186  | up   | 1,70534    | 0,7700594  | THNSL2    | Homo sapiens threonine synthase-like 2 (S. cerevisiae) (THNSL2), transcript variant 1, mRNA [NM_018271]                                                          |
| A_24_P404840  | 0,33582428 | down | -1,2989664 | -0,3773641 | GJB1      | Homo sapiens gap junction protein, beta 1, 32kDa (GJB1), transcript variant 2, mRNA [NM_000166]                                                                  |
| A_32_P25273   | 0,06712296 | down | -1,4692304 | -0,5550607 | HSPD1     | Homo sapiens heat shock 60kDa protein 1 (chaperonin) (HSPD1), transcript variant 1, mRNA [NM_002156]                                                             |
| A_33_P3340615 | 0,39955354 | up   | 1,1239284  | 0,16855016 | PON1      | Homo sapiens paraoxonase 1 (PON1), mRNA [NM_000446]                                                                                                              |
| A_32_P197524  | 0,7426789  | down | -1,1096257 | -0,1500731 | EIF2A     | Homo sapiens eukaryotic translation initiation factor 2A, 65kDa (EIF2A), mRNA [NM_032025]                                                                        |
| A_23_P345692  | 0,10754586 | down | -1,4497695 | -0,5358235 | IL17D     | Homo sapiens interleukin 17D (IL17D), mRNA [NM_138284]                                                                                                           |
| A_33_P3228271 | 0,5531498  | up   | 1,1119932  | 0,15314795 | CST3      | Homo sapiens cystatin C (CST3), transcript variant 2, mRNA [NM_001288614]                                                                                        |
| A_33_P3246007 | 0,38756946 | up   | 1,1087822  | 0,14897597 | APOA1BP   | Homo sapiens apolipoprotein A-I binding protein (APOA1BP), mRNA [NM_144772]                                                                                      |
| A_33_P3233843 | 0,5016104  | down | -1,1420324 | -0,1916036 | IL6ST     | Homo sapiens interleukin 6 signal transducer (IL6ST), transcript variant 3, mRNA [NM_001190981]                                                                  |
| A_23_P113005  | 0,09982387 | up   | 1,3912584  | 0,47639036 | EFNA1     | Homo sapiens ephrin-A1 (EFNA1), transcript variant 1, mRNA [NM_004428]                                                                                           |
| A_24_P79054   | 0,7819392  | up   | 1,0673789  | 0,09407236 | TGFB1     | Homo sapiens transforming growth factor, beta 1 (TGFB1), mRNA [NM_000660]                                                                                        |
| A_23_P206280  | 0,13620989 | up   | 1,2355384  | 0,3051398  | GPR56     | Homo sapiens G protein-coupled receptor 56 (GPR56), transcript variant 3, mRNA [NM_201525]                                                                       |
| A_23_P258410  | 0,5757498  | up   | 1,1149746  | 0,15701087 | WNT7A     | Homo sapiens wingless-type MMTV integration site family, member 7A (WNT7A), mRNA [NM_004625]                                                                     |
| A_23_P109133  | 0,7990355  | up   | 1,0559553  | 0,07854875 | AVP       | Homo sapiens arginine vasopressin (AVP), mRNA [NM_000490]                                                                                                        |

|                |            |      |            |            |          |                                                                                                                                                                     |
|----------------|------------|------|------------|------------|----------|---------------------------------------------------------------------------------------------------------------------------------------------------------------------|
| A_32_P47701    | 0,2002439  | down | -1,2371444 | -0,3070138 | EEF1A1   | Homo sapiens eukaryotic translation elongation factor 1 alpha 1 (EEF1A1), mRNA [NM_001402]                                                                          |
| A_23_P213699   | 0,03526172 | down | -2,1589885 | -1,1103555 | NRG2     | Homo sapiens neuregulin 2 (NRG2), transcript variant 3, mRNA [NM_013982]                                                                                            |
| A_23_P214330   | 0,5132956  | up   | 1,3454096  | 0,42804548 | SERPINB1 | Homo sapiens serpin peptidase inhibitor, clade B (ovalbumin), member 1 (SERPINB1), transcript variant 1, mRNA [NM_030666]                                           |
| A_23_P62659    | 0,5429938  | down | -1,0942506 | -0,1299431 | PPT1     | Homo sapiens palmitoyl-protein thioesterase 1 (PPT1), transcript variant 1, mRNA [NM_000310]                                                                        |
| A_23_P122134   | 0,27229956 | down | -1,2396275 | -0,3099066 | NMUR2    | Homo sapiens neuromedin U receptor 2 (NMUR2), mRNA [NM_020167]                                                                                                      |
| A_23_P145408   | 0,59058243 | down | -1,0871379 | -0,120535  | FUCA2    | Homo sapiens fucosidase, alpha-L- 2, plasma (FUCA2), mRNA [NM_032020]                                                                                               |
| A_33_P3269203  | 0,46912518 | down | -1,1780806 | -0,2364382 | SERPINH1 | Homo sapiens serpin peptidase inhibitor, clade H (heat shock protein 47), member 1, (collagen binding protein 1) (SERPINH1), transcript variant 1, mRNA [NM_001207] |
| A_23_P51217    | 0,4975513  | up   | 1,2083925  | 0,27308914 | CLCA1    | Homo sapiens chloride channel accessory 1 (CLCA1), mRNA [NM_001285]                                                                                                 |
| A_23_P207194   | 0,7919772  | up   | 1,0485413  | 0,06838369 | GH1      | Homo sapiens growth hormone 1 (GH1), transcript variant 1, mRNA [NM_000515]                                                                                         |
| A_23_P126735   | 0,64095837 | up   | 1,101736   | 0,1397785  | IL10     | Homo sapiens interleukin 10 (IL10), mRNA [NM_000572]                                                                                                                |
| A_33_P3364582  | 0,8038665  | up   | 1,0317755  | 0,04512906 | TNXB     | Homo sapiens tenascin XB (TNXB), transcript variant XB, mRNA [NM_019105]                                                                                            |
| A_33_P3341499  | 0,64057386 | up   | 1,1955292  | 0,2576494  | WNT5A    | Homo sapiens wingless-type MMTV integration site family, member 5A (WNT5A), transcript variant 1, mRNA [NM_003392]                                                  |
| A_19_P00802759 | 0,57393587 | up   | 1,0656302  | 0,09170687 | NUDT3    | nudix (nucleoside diphosphate linked moiety X)-type motif 3 [Source:HGNC Symbol;Acc:HGNC:8050] [ENST00000607016]                                                    |
| A_24_P206624   | 0,31431708 | down | -1,2659197 | -0,3401859 | FGFR2    | Homo sapiens fibroblast growth factor receptor 2 (FGFR2), transcript variant 2, mRNA [NM_022970]                                                                    |
| A_23_P121926   | 0,2565482  | up   | 1,5297077  | 0,613256   | SEPP1    | Homo sapiens selenoprotein P, plasma, 1 (SEPP1), transcript variant 1, mRNA [NM_005410]                                                                             |
| A_23_P143526   | 0,20629066 | up   | 1,6165016  | 0,6928749  | S100B    | Homo sapiens S100 calcium binding protein B (S100B), mRNA [NM_006272]                                                                                               |
| A_23_P31816    | 0,70136887 | up   | 1,2370001  | 0,30684564 | DEFA3    | Homo sapiens defensin, alpha 3, neutrophil-specific (DEFA3), mRNA [NM_005217]                                                                                       |
| A_33_P3261818  | 0,32061756 | down | -1,1466265 | -0,1973955 | MDH1     | Homo sapiens malate dehydrogenase 1, NAD (soluble) (MDH1), transcript variant 2, mRNA [NM_005917]                                                                   |
| A_33_P3324004  | 0,12977064 | down | -2,1588674 | -1,1102746 | CCL15    | Homo sapiens chemokine (C-C motif) ligand 15 (CCL15), mRNA [NM_032965]                                                                                              |
| A_33_P3257728  | 0,2504973  | up   | 1,2692962  | 0,34402874 | C1RL     | Homo sapiens complement component 1, r subcomponent-like (C1RL), transcript variant 3, mRNA [NM_001297642]                                                          |
| A_23_P40174    | 0,44854614 | up   | 1,8244399  | 0,8674536  | MMP9     | Homo sapiens matrix metalloproteinase 9 (gelatinase B, 92kDa gelatinase, 92kDa type IV collagenase) (MMP9), mRNA [NM_004994]                                        |
| A_23_P155351   | 0,52252233 | down | -1,1446953 | -0,1949636 | BTD      | Homo sapiens biotinidase (BTD), transcript variant 3, mRNA [NM_000060]                                                                                              |
| A_23_P153320   | 0,7261676  | up   | 1,1353265  | 0,18310726 | ICAM1    | Homo sapiens intercellular adhesion molecule 1 (ICAM1), mRNA [NM_000201]                                                                                            |
| A_32_P162187   | 0,6074952  | up   | 1,1579508  | 0,2115739  | C2       | Homo sapiens complement component 2 (C2), transcript variant 1, mRNA [NM_000063]                                                                                    |
| A_19_P00809660 | 0,22254838 | up   | 1,2376976  | 0,30765888 | FGF13    | fibroblast growth factor 13 [Source:HGNC Symbol;Acc:HGNC:3670] [ENST00000421460]                                                                                    |
| A_23_P502312   | 0,27341995 | down | -1,6682338 | -0,7383214 | CD97     | Homo sapiens CD97 molecule (CD97), transcript variant 1, mRNA [NM_078481]                                                                                           |
| A_33_P3392245  | 0,6738635  | up   | 1,085441   | 0,1182813  | FAM178A  | Homo sapiens family with sequence similarity 178, member A (FAM178A), transcript variant 2, mRNA [NM_001136123]                                                     |
| A_33_P3279640  | 0,19153516 | down | -1,2933073 | -0,3710651 | HCN2     | Homo sapiens hyperpolarization activated cyclic nucleotide gated potassium channel 2 (HCN2), mRNA [NM_0011194]                                                      |
| A_24_P289139   | 0,10480131 | up   | 1,4361486  | 0,52220505 | SH3KBP1  | Homo sapiens SH3-domain kinase binding protein 1 (SH3KBP1), transcript variant 2, mRNA [NM_001024666]                                                               |
| A_33_P3248539  | 0,23519194 | up   | 1,3323644  | 0,41398874 | LCN1     | Homo sapiens lipocalin 1 (LCN1), transcript variant 2, mRNA [NM_001252617]                                                                                          |
| A_23_P120883   | 0,45369956 | up   | 1,247473   | 0,3190086  | HMOX1    | Homo sapiens heme oxygenase (decycling) 1 (HMOX1), mRNA [NM_002133]                                                                                                 |
| A_23_P383009   | 0,23172355 | down | -2,0226507 | -1,0162472 | IGFBP5   | Homo sapiens insulin-like growth factor binding protein 5 (IGFBP5), mRNA [NM_000599]                                                                                |
| A_32_P137939   | 0,3571411  | up   | 1,1950469  | 0,25706723 | ACTB     | Homo sapiens actin, beta (ACTB), mRNA [NM_001101]                                                                                                                   |
| A_24_P134319   | 0,6061912  | up   | 1,0699311  | 0,09751796 | ADNP     | Homo sapiens activity-dependent neuroprotector homeobox (ADNP), transcript variant 3, mRNA [NM_001282531]                                                           |
| A_23_P208493   | 0,31852493 | up   | 1,557862   | 0,6395675  | LILRB2   | Homo sapiens leukocyte immunoglobulin-like receptor, subfamily B (with TM and ITIM domains), member 2 (LILRB2), transcript variant 1, mRNA [NM_005874]              |
| A_23_P69497    | 0,45163035 | up   | 1,1802026  | 0,23903455 | CLEC3B   | Homo sapiens C-type lectin domain family 3, member B (CLEC3B), mRNA [NM_003278]                                                                                     |
| A_24_P245298   | 0,80384195 | up   | 1,0492744  | 0,06939207 | TNFSF12  | Homo sapiens tumor necrosis factor (ligand) superfamily, member 12 (TNFSF12), transcript variant 1, mRNA [NM_003809]                                                |
| A_23_P79518    | 0,5824083  | down | -1,5523683 | -0,6344709 | IL1B     | Homo sapiens interleukin 1, beta (IL1B), mRNA [NM_000576]                                                                                                           |
| A_23_P476      | 0,66028047 | up   | 1,0617917  | 0,08650071 | MPZL1    | Homo sapiens myelin protein zero-like 1 (MPZL1), transcript variant 1, mRNA [NM_003953]                                                                             |
| A_33_P3353242  | 0,17536698 | up   | 1,3393894  | 0,4215755  | HSPB1    | Homo sapiens heat shock 27kDa protein 1 (HSPB1), mRNA [NM_001540]                                                                                                   |
| A_23_P86599    | 0,8681354  | down | -1,1914651 | -0,2527368 | DMBT1    | Homo sapiens deleted in malignant brain tumors 1 (DMBT1), transcript variant 2, mRNA [NM_007329]                                                                    |
| A_33_P3277373  | 0,85852623 | down | -1,0380911 | -0,053933  | OSM      | Homo sapiens oncostatin M (OSM), mRNA [NM_020530]                                                                                                                   |
| A_23_P119943   | 0,15755913 | down | -1,4482676 | -0,5343282 | IGFBP2   | Homo sapiens insulin-like growth factor binding protein 2, 36kDa (IGFBP2), mRNA [NM_000597]                                                                         |
| A_33_P3423570  | 0,537201   | down | -1,2184789 | -0,2850813 | METRN    | Homo sapiens meteorin, glial cell differentiation regulator (METRN), mRNA [NM_024042]                                                                               |
| A_23_P132793   | 0,47497037 | up   | 1,1549281  | 0,20780303 | MANF     | Homo sapiens mesencephalic astrocyte-derived neurotrophic factor (MANF), mRNA [NM_006010]                                                                           |
| A_24_P148717   | 0,23587649 | up   | 1,4262177  | 0,51219416 | CCR1     | Homo sapiens chemokine (C-C motif) receptor 1 (CCR1), mRNA [NM_001295]                                                                                              |
| A_24_P304423   | 0,5273208  | up   | 1,2175506  | 0,28398177 | IGF1     | Homo sapiens insulin-like growth factor 1 (somatomedin C) (IGF1), transcript variant 4, mRNA [NM_000618]                                                            |
| A_23_P68910    | 0,33666354 | up   | 1,2051014  | 0,26915452 | SSTR3    | Homo sapiens somatostatin receptor 3 (SSTR3), transcript variant 1, mRNA [NM_001051]                                                                                |
| A_24_P9285     | 0,25274897 | down | -1,1870121 | -0,2473346 | LMAN2    | Homo sapiens lectin, mannose-binding 2 (LMAN2), mRNA [NM_006816]                                                                                                    |
| A_23_P119478   | 0,40008697 | up   | 1,2596227  | 0,33299166 | EBI3     | Homo sapiens Epstein-Barr virus induced 3 (EBI3), mRNA [NM_005755]                                                                                                  |
| A_23_P153480   | 0,00814065 | up   | 11,039466  | 3,4645984  | KLK5     | Homo sapiens kallikrein-related peptidase 5 (KLK5), transcript variant 1, mRNA [NM_012427]                                                                          |
| A_23_P138680   | 0,34676954 | up   | 1,1882101  | 0,24879    | IL15RA   | Homo sapiens interleukin 15 receptor, alpha (IL15RA), transcript variant 2, mRNA [NM_172200]                                                                        |
| A_33_P3685216  | 0,06927246 | up   | 1,5196508  | 0,60373986 | A1BG     | Homo sapiens alpha-1-B glycoprotein (A1BG), mRNA [NM_130786]                                                                                                        |
| A_24_P940006   | 0,06353733 | down | -1,8672678 | -0,9009289 | EFNB3    | Homo sapiens ephrin-B3 (EFNB3), mRNA [NM_001406]                                                                                                                    |
| A_23_P71144    | 0,3847361  | down | -2,1387477 | -1,0967662 | CXCL1    | Homo sapiens chemokine (C-X-C motif) ligand 1 (melanoma growth stimulating activity, alpha) (CXCL1), transcript variant 1, mRNA [NM_001511]                         |

|                |            |      |            |            |          |                                                                                                                                      |
|----------------|------------|------|------------|------------|----------|--------------------------------------------------------------------------------------------------------------------------------------|
| A_19_P00322757 | 0,29809073 | up   | 1,211599   | 0,27691227 | MCF2L    | MCF.2 cell line derived transforming sequence-like [Source:HGNC Symbol;Acc:HGNC:14576] [ENST00000442625]                             |
| A_24_P14731    | 0,1654251  | down | -1,3683724 | -0,4524609 | PCSK1N   | Homo sapiens proprotein convertase subtilisin/kexin type 1 inhibitor (PCSK1N), mRNA [NM_013271]                                      |
| A_23_P114883   | 0,08924329 | down | -3,5694208 | -1,83569   | FMOD     | Homo sapiens fibromodulin (FMOD), transcript variant 1, mRNA [NM_002023]                                                             |
| A_23_P395954   | 0,17512895 | up   | 1,2851164  | 0,36189908 | SSH2     | slingshot protein phosphatase 2 [Source:HGNC Symbol;Acc:HGNC:30580] [ENST00000394848]                                                |
| A_23_P253791   | 0,00369171 | down | -2,6437979 | -1,4026119 | CAMP     | Homo sapiens cathelicidin antimicrobial peptide (CAMP), mRNA [NM_004345]                                                             |
| A_23_P203488   | 0,5663369  | up   | 1,1242197  | 0,16892394 | SMPD1    | Homo sapiens sphingomyelin phosphodiesterase 1, acid lysosomal (SMPD1), transcript variant 1, mRNA [NM_000543]                       |
| A_23_P215484   | 0,5059615  | down | -1,460176  | -0,5461423 | CCL26    | Homo sapiens chemokine (C-C motif) ligand 26 (CCL26), mRNA [NM_006072]                                                               |
| A_24_P242646   | 0,2975158  | down | -1,2483668 | -0,3200419 | CTSS     | Homo sapiens cathepsin S (CTSS), transcript variant 1, mRNA [NM_004079]                                                              |
| A_23_P155765   | 0,33783665 | down | -1,3977178 | -0,4830732 | HMGB2    | Homo sapiens high mobility group box 2 (HMGB2), transcript variant 1, mRNA [NM_002129]                                               |
| A_23_P23611    | 0,7065537  | up   | 1,1034755  | 0,14205453 | AMY1C    | Homo sapiens amylase, alpha 1C (salivary) (AMY1C), mRNA [NM_001008219]                                                               |
| A_23_P35092    | 0,33100364 | up   | 1,5995077  | 0,6776279  | IL19     | Homo sapiens interleukin 19 (IL19), transcript variant 1, mRNA [NM_153758]                                                           |
| A_33_P3225268  | 0,02080355 | up   | 1,4273466  | 0,5133357  | QSOX1    | Homo sapiens quiescien Q6 sulfhydryl oxidase 1 (QSOX1), transcript variant 2, mRNA [NM_001004128]                                    |
| A_32_P156963   | 0,88690597 | up   | 1,032398   | 0,04599923 | ACTG1    | Homo sapiens actin gamma 1 (ACTG1), transcript variant 2, mRNA [NM_001614]                                                           |
| A_33_P3397288  | 0,55481744 | down | -1,1128007 | -0,1541953 | EDN3     | Homo sapiens endothelin 3 (EDN3), transcript variant 2, mRNA [NM_207032]                                                             |
| A_33_P3238166  | 0,45189866 | up   | 1,5682505  | 0,64915603 | PXDN     | Homo sapiens peroxidasin (PXDN), mRNA [NM_012293]                                                                                    |
| A_23_P218646   | 0,25574556 | up   | 1,9668758  | 0,97590584 | TNFRSF6B | Homo sapiens tumor necrosis factor receptor superfamily, member 6b, decoy (TNFRSF6B), mRNA [NM_003823]                               |
| A_23_P101950   | 0,29523283 | down | -1,1611546 | -0,2155601 | MDH1     | Homo sapiens malate dehydrogenase 1, NAD (soluble) (MDH1), transcript variant 2, mRNA [NM_005917]                                    |
| A_23_P385690   | 0,51780844 | down | -1,170818  | -0,2275168 | WNT3A    | Homo sapiens wingless-type MMTV integration site family, member 3A (WNT3A), mRNA [NM_033131]                                         |
| A_33_P3359683  | 0,6520237  | up   | 1,0820146  | 0,11371991 | IL16     | Homo sapiens interleukin 16 (IL16), transcript variant 3, mRNA [NM_001172128]                                                        |
| A_24_P236091   | 0,0402301  | down | -2,8291862 | -1,5003871 | ENO2     | Homo sapiens enolase 2 (gamma, neuronal) (ENO2), mRNA [NM_001975]                                                                    |
| A_33_P3283480  | 0,2002148  | up   | 1,202815   | 0,26641482 | CTSC     | Homo sapiens cathepsin C (CTSC), transcript variant 2, mRNA [NM_148170]                                                              |
| A_33_P3369371  | 0,11417031 | down | -1,5175962 | -0,601788  | GPX3     | Homo sapiens glutathione peroxidase 3 (plasma) (GPX3), mRNA [NM_002084]                                                              |
| A_33_P3256778  | 0,20925272 | down | -1,5347852 | -0,6180367 | CNTF     | Homo sapiens ciliary neurotrophic factor (CNTF), mRNA [NM_000614]                                                                    |
| A_23_P215634   | 0,23609251 | up   | 1,7874928  | 0,83793736 | IGFBP3   | Homo sapiens insulin-like growth factor binding protein 3 (IGFBP3), transcript variant 1, mRNA [NM_001013398]                        |
| A_24_P322771   | 0,37494272 | up   | 1,7275747  | 0,7887481  | TFF1     | Homo sapiens trefoil factor 1 (TFF1), mRNA [NM_003225]                                                                               |
| A_23_P162322   | 0,46904725 | up   | 1,2000822  | 0,2631332  | WNT10B   | Homo sapiens wingless-type MMTV integration site family, member 10B (WNT10B), mRNA [NM_003394]                                       |
| A_23_P91619    | 0,39663357 | up   | 1,1729873  | 0,23018745 | MIF      | Homo sapiens macrophage migration inhibitory factor (glycosylation-inhibiting factor) (MIF), mRNA [NM_002415]                        |
| A_24_P46130    | 0,6979519  | up   | 1,1943941  | 0,25627896 | ACPP     | Homo sapiens acid phosphatase, prostate (ACPP), transcript variant 1, mRNA [NM_001099]                                               |
| A_24_P364296   | 0,03997383 | down | -3,3344965 | -1,737469  | STX2     | Homo sapiens syntaxin 2 (STX2), transcript variant 1, mRNA [NM_001980]                                                               |
| A_33_P3395513  | 0,81235105 | up   | 1,0458759  | 0,06471168 | NRG2     | Homo sapiens cDNA FLJ42513 fis, clone BRACE2046295, highly similar to Pro-neuregulin-2, membrane-bound isoform precursor. [AK124504] |
| A_23_P8913     | 0,16434136 | up   | 2,4603426  | 1,2988592  | CA2      | Homo sapiens carbonic anhydrase II (CA2), transcript variant 1, mRNA [NM_000067]                                                     |
| A_23_P93311    | 0,20194982 | down | -1,2143598 | -0,2801959 | DDR1     | Homo sapiens discoidin domain receptor tyrosine kinase 1 (DDR1), transcript variant 2, mRNA [NM_013993]                              |
| A_23_P89587    | 0,7006806  | down | -1,0842581 | -0,1167082 | WNT9B    | Homo sapiens wingless-type MMTV integration site family, member 9B (WNT9B), mRNA [NM_003396]                                         |
| A_24_P401174   | 0,74820644 | down | -1,0824169 | -0,1142563 | KIAA0556 | Homo sapiens KIAA0556 (KIAA0556), mRNA [NM_015202]                                                                                   |
| A_33_P3351944  | 0,81249005 | down | -1,0456939 | -0,0644606 | EGFR     | Homo sapiens epidermal growth factor receptor (EGFR), transcript variant 3, mRNA [NM_201283]                                         |
| A_23_P103104   | 0,57359886 | up   | 1,1330259  | 0,18018082 | MFNG     | Homo sapiens MFNG O-fucosylpeptide 3-beta-N-acetylglucosaminyltransferase (MFNG), transcript variant 1, mRNA [NM_002405]             |
| A_24_P287189   | 0,03805355 | down | -1,4971358 | -0,5822051 | TOLLIP   | Homo sapiens toll interacting protein (TOLLIP), mRNA [NM_019009]                                                                     |
| A_23_P329573   | 0,06282665 | up   | 1,8198986  | 0,86385804 | ITGB2    | Homo sapiens integrin, beta 2 (complement component 3 receptor 3 and 4 subunit) (ITGB2), transcript variant 1, mRNA [NM_000211]      |
| A_33_P3286278  | 0,01517153 | up   | 1,6282812  | 0,7033499  | GRN      | Homo sapiens granulin (GRN), mRNA [NM_002087]                                                                                        |
| A_23_P104464   | 0,2516819  | up   | 1,4361011  | 0,5221573  | ALOX5    | Homo sapiens arachidonate 5-lipoxygenase (ALOX5), transcript variant 1, mRNA [NM_000698]                                             |
| A_23_P428887   | 0,05947252 | up   | 1,5998344  | 0,6779226  | KLHL34   | Homo sapiens kelch-like family member 34 (KLHL34), mRNA [NM_153270]                                                                  |
| A_33_P3388870  | 0,6317166  | up   | 1,0712426  | 0,0992852  | BLOC1S1  | Homo sapiens biogenesis of lysosomal organelles complex-1, subunit 1 (BLOC1S1), transcript variant 1, mRNA [NM_001487]               |
| A_24_P129417   | 0,321708   | up   | 1,4583763  | 0,544363   | BMP1     | Homo sapiens bone morphogenetic protein 1 (BMP1), transcript variant 1, mRNA [NM_001199]                                             |
| A_24_P390495   | 0,5144565  | down | -1,2989109 | -0,3773024 | CX3CL1   | chemokine (C-X3-C motif) ligand 1 [Source:HGNC Symbol;Acc:HGNC:10647] [ENST00000006053]                                              |
| A_33_P3322363  | 0,26222402 | down | -1,3681809 | -0,4522589 | HMSD     | Homo sapiens histocompatibility (minor) serpin domain containing (HMSD), mRNA [NM_001123366]                                         |
| A_23_P51039    | 0,29872593 | up   | 1,2239316  | 0,29152286 | INHA     | Homo sapiens inhibin, alpha (INHA), mRNA [NM_002191]                                                                                 |
| A_33_P3405213  | 0,8029848  | down | -1,091461  | -0,1262605 | PECAM1   | Homo sapiens platelet/endothelial cell adhesion molecule 1 (PECAM1), mRNA [NM_000442]                                                |
| A_24_P202497   | 0,13624804 | down | -1,2378609 | -0,3078492 | TWSG1    | Homo sapiens twisted gastrulation BMP signaling modulator 1 (TWSG1), mRNA [NM_020648]                                                |
| A_23_P105833   | 0,8761674  | up   | 1,0212798  | 0,03037819 | BIVM     | Homo sapiens basic, immunoglobulin-like variable motif containing (BIVM), transcript variant 1, mRNA [NM_017693]                     |
| A_24_P784765   | 0,24952076 | up   | 1,3192157  | 0,3996804  | CD59     | Homo sapiens CD59 molecule, complement regulatory protein (CD59), transcript variant 1, mRNA [NM_203330]                             |
| A_33_P3367692  | 0,66598994 | up   | 1,0987316  | 0,13583905 | CFH      | Homo sapiens complement factor H (CFH), transcript variant 2, mRNA [NM_001014975]                                                    |
| A_23_P44932    | 0,2467943  | down | -1,181934  | -0,2411495 | EIF2A    | Homo sapiens eukaryotic translation initiation factor 2A, 65kDa (EIF2A), mRNA [NM_032025]                                            |
| A_23_P69586    | 0,8172932  | up   | 1,0860174  | 0,11904718 | FAT1     | Homo sapiens FAT atypical cadherin 1 (FAT1), mRNA [NM_005245]                                                                        |
| A_23_P159721   | 0,65253556 | up   | 1,0961901  | 0,132498   | GPR50    | Homo sapiens G protein-coupled receptor 50 (GPR50), mRNA [NM_004224]                                                                 |
| A_23_P258246   | 0,18083712 | down | -1,1736488 | -0,2310008 | DDB1     | Homo sapiens damage-specific DNA binding protein 1, 127kDa (DDB1), mRNA [NM_001923]                                                  |

|               |            |      |            |            |           |                                                                                                                                                              |
|---------------|------------|------|------------|------------|-----------|--------------------------------------------------------------------------------------------------------------------------------------------------------------|
| A_23_P61127   | 0,14308597 | down | -1,3746271 | -0,4590403 | APOO      | Homo sapiens apolipoprotein O (APOO), transcript variant 1, mRNA [NM_024122]                                                                                 |
| A_23_P15146   | 0,3371758  | up   | 1,4741156  | 0,5598497  | IL32      | Homo sapiens interleukin 32 (IL32), transcript variant 1, mRNA [NM_001012631]                                                                                |
| A_23_P7212    | 0,0613879  | up   | 2,0259044  | 1,0185661  | CFI       | Homo sapiens complement factor I (CFI), mRNA [NM_000204]                                                                                                     |
| A_33_P3697530 | 0,8358786  | down | -1,0470719 | -0,0663606 | SEMA4D    | Homo sapiens sema domain, immunoglobulin domain (Ig), transmembrane domain (TM) and short cytoplasmic domain, (semaphorin) 4D (SEMA4D), transcript variant 2 |
| A_33_P3233040 | 0,65024674 | up   | 1,244118   | 0,3151233  | SERPINB11 | Homo sapiens serpin peptidase inhibitor, clade B (ovalbumin), member 11 (gene/pseudogene) (SERPINB11), transcript variant 1, mRNA [NM_080475]                |
| A_23_P66608   | 0,6576935  | up   | 1,1019773  | 0,14009456 | KAT2A     | Homo sapiens K(lysine) acetyltransferase 2A (KAT2A), mRNA [NM_021078]                                                                                        |
| A_23_P202448  | 0,35407692 | up   | 1,3065336  | 0,38574418 | CXCL12    | Homo sapiens chemokine (C-X-C motif) ligand 12 (CXCL12), transcript variant 1, mRNA [NM_199168]                                                              |
| A_23_P156061  | 0,11683965 | up   | 1,3434765  | 0,42597112 | LNPEP     | Homo sapiens leucyl/cystinyl aminopeptidase (LNPEP), transcript variant 1, mRNA [NM_005575]                                                                  |
| A_33_P3368453 | 0,1708443  | down | -1,2940586 | -0,3719029 | MICA      | Homo sapiens MHC class I polypeptide-related sequence A (MICA), transcript variant 1*001, mRNA [NM_000247]                                                   |
| A_33_P3377194 | 0,22085142 | up   | 1,1943074  | 0,25617427 | ADRA1A    | Homo sapiens adrenoceptor alpha 1A (ADRA1A), transcript variant 4, mRNA [NM_033304]                                                                          |
| A_23_P84219   | 0,65930766 | up   | 1,1108428  | 0,1516547  | LIPH      | Homo sapiens lipase, member H (LIPH), mRNA [NM_139248]                                                                                                       |
| A_23_P30884   | 0,44521636 | down | -1,1021602 | -0,140334  | CLIC1     | Homo sapiens chloride intracellular channel 1 (CLIC1), transcript variant 2, mRNA [NM_001288]                                                                |
| A_24_P192994  | 0,06294756 | down | -2,3753576 | -1,2481447 | FADS1     | Homo sapiens fatty acid desaturase 1 (FADS1), mRNA [NM_013402]                                                                                               |
| A_32_P223777  | 0,47033617 | down | -1,0932158 | -0,1285783 | IL6ST     | Homo sapiens interleukin 6 signal transducer (IL6ST), transcript variant 1, mRNA [NM_002184]                                                                 |
| A_23_P361544  | 0,033437   | down | -2,158292  | -1,1098901 | CES4A     | Homo sapiens carboxylesterase 4A (CES4A), transcript variant 1, mRNA [NM_173815]                                                                             |
| A_23_P11995   | 0,25228143 | down | -1,2261479 | -0,294133  | PRDX1     | Homo sapiens peroxiredoxin 1 (PRDX1), transcript variant 1, mRNA [NM_002574]                                                                                 |
| A_33_P3233841 | 0,13534483 | down | -1,2694143 | -0,344163  | IL6ST     | Homo sapiens interleukin 6 signal transducer (IL6ST), transcript variant 1, mRNA [NM_002184]                                                                 |
| A_23_P57364   | 0,83465654 | down | -1,0531974 | -0,0747758 | TFF2      | Homo sapiens trefoil factor 2 (TFF2), mRNA [NM_005423]                                                                                                       |
| A_33_P3380618 | 0,63125396 | up   | 1,0821394  | 0,11388632 | HSPG2     | Homo sapiens heparan sulfate proteoglycan 2 (HSPG2), transcript variant 1, mRNA [NM_001291860]                                                               |
| A_23_P32125   | 0,8740183  | down | -1,020747  | -0,0296253 | PMPCA     | Homo sapiens peptidase (mitochondrial processing) alpha (PMPCA), transcript variant 1, mRNA [NM_015160]                                                      |
| A_33_P3258392 | 0,05227085 | up   | 2,0880384  | 1,0621482  | EDN1      | Homo sapiens endothelin 1 (EDN1), transcript variant 1, mRNA [NM_001955]                                                                                     |
| A_24_P261169  | 0,58781123 | down | -1,1451144 | -0,1954918 | SEMA4D    | Homo sapiens sema domain, immunoglobulin domain (Ig), transmembrane domain (TM) and short cytoplasmic domain, (semaphorin) 4D (SEMA4D), transcript variant 1 |
| A_23_P39465   | 0,684927   | up   | 1,1616111  | 0,21612711 | BST2      | Homo sapiens bone marrow stromal cell antigen 2 (BST2), mRNA [NM_004335]                                                                                     |
| A_23_P8961    | 0,8162647  | down | -1,0827469 | -0,114696  | IL7       | Homo sapiens interleukin 7 (IL7), transcript variant 1, mRNA [NM_000880]                                                                                     |
| A_23_P14774   | 0,8109899  | up   | 1,0448828  | 0,0633411  | CTSH      | Homo sapiens cathepsin H (CTSH), mRNA [NM_004390]                                                                                                            |
| A_23_P435407  | 0,02313798 | down | -1,7620481 | -0,8172533 | GPC4      | Homo sapiens glypican 4 (GPC4), mRNA [NM_001448]                                                                                                             |
| A_33_P3254121 | 0,6617376  | up   | 1,0702267  | 0,09791639 | RNASET2   | ribonuclease T2 [Source:HGNC Symbol;Acc:HGNC:21686] [ENST00000358165]                                                                                        |
| A_23_P168828  | 0,6258411  | up   | 1,1687083  | 0,22491492 | KLF10     | Homo sapiens Kruppel-like factor 10 (KLF10), transcript variant 1, mRNA [NM_005655]                                                                          |
| A_23_P162918  | 0,85682446 | up   | 1,0543584  | 0,0763653  | SERPINA3  | Homo sapiens serpin peptidase inhibitor, clade A (alpha-1 antitrypsinase, antitrypsin), member 3 (SERPINA3), mRNA [NM_001085]                                |
| A_23_P157361  | 0,09985998 | down | -1,7402253 | -0,7992741 | WDR60     | Homo sapiens WD repeat domain 60 (WDR60), mRNA [NM_018051]                                                                                                   |
| A_33_P3303542 | 0,33412525 | down | -1,2668612 | -0,3412585 | SSC5D     | Homo sapiens scavenger receptor cysteine rich family, 5 domains (SSC5D), transcript variant 1, mRNA [NM_001144950]                                           |
| A_33_P3422822 | 0,03924826 | down | -2,21264   | -1,1457688 | GJC2      | Homo sapiens gap junction protein, gamma 2, 47kDa (GJC2), mRNA [NM_020435]                                                                                   |
| A_23_P162171  | 0,25044632 | down | -1,7549609 | -0,8114389 | MCAM      | Homo sapiens melanoma cell adhesion molecule (MCAM), mRNA [NM_006500]                                                                                        |
| A_23_P15734   | 0,1571636  | up   | 1,487235   | 0,57263255 | KRT9      | Homo sapiens keratin 9, type I (KRT9), mRNA [NM_000226]                                                                                                      |
| A_33_P3286916 | 0,52520806 | up   | 1,1290303  | 0,17508426 | PDZD7     | Homo sapiens PDZ domain containing 7 (PDZD7), transcript variant 1, mRNA [NM_001195263]                                                                      |
| A_33_P3321657 | 0,5998873  | up   | 1,0976064  | 0,13436082 | HSPG2     | Homo sapiens heparan sulfate proteoglycan 2 (HSPG2), transcript variant 1, mRNA [NM_001291860]                                                               |
| A_23_P68487   | 0,09134058 | up   | 2,0375254  | 1,026818   | BMP7      | Homo sapiens bone morphogenetic protein 7 (BMP7), mRNA [NM_001719]                                                                                           |
| A_33_P3349045 | 0,36414886 | up   | 1,3198246  | 0,4003462  | IL4R      | Homo sapiens interleukin 4 receptor (IL4R), transcript variant 4, mRNA [NM_001257407]                                                                        |
| A_23_P73589   | 0,74906224 | up   | 1,1127942  | 0,15418676 | MSN       | Homo sapiens moesin (MSN), mRNA [NM_002444]                                                                                                                  |
| A_33_P3233834 | 0,56509316 | down | -1,0904009 | -0,1248587 | IL6ST     | Homo sapiens interleukin 6 signal transducer (IL6ST), transcript variant 3, mRNA [NM_001190981]                                                              |
| A_23_P150053  | 0,5122088  | down | -1,334086  | -0,4158516 | ACTA2     | Homo sapiens actin, alpha 2, smooth muscle, aorta (ACTA2), transcript variant 2, mRNA [NM_001613]                                                            |
| A_33_P3405839 | 0,8401941  | down | -1,0309243 | -0,0439384 | TPO       | Homo sapiens thyroid peroxidase (TPO), transcript variant 5, mRNA [NM_175722]                                                                                |
| A_23_P160559  | 0,04083037 | up   | 8,362579   | 3,063948   | ECM1      | Homo sapiens extracellular matrix protein 1 (ECM1), transcript variant 1, mRNA [NM_004425]                                                                   |
| A_24_P38276   | 0,12624162 | up   | 1,250821   | 0,32287532 | FZD1      | Homo sapiens frizzled class receptor 1 (FZD1), mRNA [NM_003505]                                                                                              |
| A_33_P3243857 | 0,48866478 | up   | 1,1508176  | 0,20265923 | ADAM10    | Homo sapiens ADAM metallopeptidase domain 10 (ADAM10), mRNA [NM_001110]                                                                                      |
| A_24_P88763   | 0,06695586 | up   | 1,3922687  | 0,47743762 | LOXL3     | Homo sapiens lysyl oxidase-like 3 (LOXL3), transcript variant 1, mRNA [NM_032603]                                                                            |
| A_23_P97990   | 0,17067678 | down | -1,2656925 | -0,3399269 | HTRA1     | Homo sapiens Htra serine peptidase 1 (HTRA1), mRNA [NM_002775]                                                                                               |
| A_24_P911607  | 0,08986841 | up   | 1,4645975  | 0,5505042  | WNT7B     | Homo sapiens wingless-type MMTV integration site family, member 7B (WNT7B), mRNA [NM_058238]                                                                 |
| A_33_P3363168 | 0,45477805 | up   | 1,109507   | 0,14991872 | SSH2      | Homo sapiens slingshot protein phosphatase 2 (SSH2), transcript variant 1, mRNA [NM_001282129]                                                               |
| A_23_P376088  | 0,32648492 | up   | 1,2024835  | 0,26601714 | LIME1     | Homo sapiens Lck interacting transmembrane adaptor 1 (LIME1), mRNA [NM_017806]                                                                               |
| A_23_P130149  | 0,34265518 | up   | 1,2961763  | 0,37426198 | ENO3      | Homo sapiens enolase 3 (beta, muscle) (ENO3), transcript variant 1, mRNA [NM_001976]                                                                         |
| A_33_P3241369 | 0,27644363 | down | -1,3377208 | -0,419777  | UCN3      | Homo sapiens urocortin 3 (UCN3), mRNA [NM_053049]                                                                                                            |
| A_33_P3822503 | 0,08374878 | down | -1,5315939 | -0,6150338 | CTF1      | Homo sapiens cardiotrophin 1 (CTF1), transcript variant 1, mRNA [NM_001330]                                                                                  |
| A_33_P3362371 | 0,5196997  | down | -1,0783786 | -0,1088637 | RTN3      | Homo sapiens reticulon 3 (RTN3), transcript variant 7, mRNA [NM_001265591]                                                                                   |
| A_23_P113351  | 0,05453372 | down | -2,0422482 | -1,0301583 | SPARCL1   | Homo sapiens SPARC-like 1 (hevin) (SPARCL1), transcript variant 2, mRNA [NM_004684]                                                                          |

|               |            |      |            |            |          |                                                                                                                                           |
|---------------|------------|------|------------|------------|----------|-------------------------------------------------------------------------------------------------------------------------------------------|
| A_33_P3284345 | 0,80258954 | down | -1,1063051 | -0,1457494 | NRG1     | Homo sapiens neuregulin 1 (NRG1), transcript variant HRG-gamma, mRNA [NM_004495]                                                          |
| A_23_P133474  | 0,22809277 | down | -1,3125782 | -0,3924034 | GPX3     | Homo sapiens glutathione peroxidase 3 (plasma) (GPX3), mRNA [NM_002084]                                                                   |
| A_23_P94800   | 0,20810027 | up   | 1,3976902  | 0,4830446  | S100A4   | Homo sapiens S100 calcium binding protein A4 (S100A4), transcript variant 1, mRNA [NM_002961]                                             |
| A_33_P3381338 | 0,05035963 | up   | 1,4039744  | 0,48951665 | TNXB     | Homo sapiens tenascin XB (TNXB), transcript variant XB, mRNA [NM_019105]                                                                  |
| A_23_P149529  | 0,37922758 | up   | 1,1712219  | 0,22801438 | TACSTD2  | Homo sapiens tumor-associated calcium signal transducer 2 (TACSTD2), mRNA [NM_002353]                                                     |
| A_23_P136978  | 0,22774617 | up   | 1,1971023  | 0,25954646 | SRPX2    | Homo sapiens sushi-repeat containing protein, X-linked 2 (SRPX2), mRNA [NM_014467]                                                        |
| A_23_P421423  | 0,12046151 | up   | 1,6655777  | 0,7360226  | TNFAIP2  | Homo sapiens tumor necrosis factor, alpha-induced protein 2 (TNFAIP2), mRNA [NM_006291]                                                   |
| A_23_P204947  | 0,81850153 | up   | 1,1676795  | 0,2236444  | GJB2     | Homo sapiens gap junction protein, beta 2, 26kDa (GJB2), mRNA [NM_004004]                                                                 |
| A_23_P55828   | 0,12855538 | down | -1,7675353 | -0,821739  | CCL25    | Homo sapiens chemokine (C-C motif) ligand 25 (CCL25), transcript variant 1, mRNA [NM_005624]                                              |
| A_33_P3246885 | 0,88564456 | up   | 1,0692121  | 0,09654804 | DMKN     | Homo sapiens dermokine (DMKN), transcript variant 9, mRNA [NM_001190348]                                                                  |
| A_23_P16523   | 0,8482265  | up   | 1,0650535  | 0,09092585 | GDF15    | Homo sapiens growth differentiation factor 15 (GDF15), mRNA [NM_004864]                                                                   |
| A_23_P201636  | 0,12453916 | down | -1,5243695 | -0,6082126 | LAMC2    | Homo sapiens laminin, gamma 2 (LAMC2), transcript variant 1, mRNA [NM_005562]                                                             |
| A_23_P254594  | 0,533792   | up   | 1,1434195  | 0,1933548  | GNRH1    | Homo sapiens gonadotropin-releasing hormone 1 (luteinizing-releasing hormone) (GNRH1), transcript variant 1, mRNA [NM_000825]             |
| A_23_P57036   | 0,85995346 | down | -1,050379  | -0,07091   | CD40     | Homo sapiens CD40 molecule, TNF receptor superfamily member 5 (CD40), transcript variant 1, mRNA [NM_001250]                              |
| A_23_P18452   | 0,11056153 | up   | 3,9218621  | 1,9715388  | CXCL9    | Homo sapiens chemokine (C-X-C motif) ligand 9 (CXCL9), mRNA [NM_002416]                                                                   |
| A_23_P155979  | 0,4575603  | up   | 1,2863446  | 0,36327723 | EGF      | Homo sapiens epidermal growth factor (EGF), transcript variant 1, mRNA [NM_001963]                                                        |
| A_23_P256413  | 0,11599319 | down | -1,396649  | -0,4819695 | CMTM7    | Homo sapiens CKLF-like MARVEL transmembrane domain containing 7 (CMTM7), transcript variant 1, mRNA [NM_138410]                           |
| A_23_P59452   | 0,18332952 | up   | 1,5364524  | 0,6196031  | AOC1     | Homo sapiens amine oxidase, copper containing 1 (AOC1), transcript variant 2, mRNA [NM_001091]                                            |
| A_33_P3326634 | 0,50584185 | up   | 1,4328234  | 0,5188608  | GPC3     | Homo sapiens glypican 3 (GPC3), transcript variant 1, mRNA [NM_001164617]                                                                 |
| A_23_P137948  | 0,33624107 | up   | 1,1513702  | 0,20335174 | NENF     | Homo sapiens neudesin neurotrophic factor (NENF), transcript variant 1, mRNA [NM_013349]                                                  |
| A_23_P312300  | 0,18774483 | down | -2,688576  | -1,4268422 | SCGB2A1  | Homo sapiens secretoglobin, family 2A, member 1 (SCGB2A1), mRNA [NM_002407]                                                               |
| A_33_P3402489 | 0,36172146 | up   | 1,3461794  | 0,42887065 | OAS3     | Homo sapiens 2'-5'-oligoadenylate synthetase 3, 100kDa (OAS3), mRNA [NM_006187]                                                           |
| A_32_P95739   | 0,5352109  | up   | 1,1238015  | 0,16838719 | TPH1     | Homo sapiens triosephosphate isomerase 1 (TPH1), transcript variant 1, mRNA [NM_000365]                                                   |
| A_23_P412321  | 0,527566   | up   | 1,2211975  | 0,28829652 | CCR5     | Homo sapiens chemokine (C-C motif) receptor 5 (gene/pseudogene) (CCR5), transcript variant A, mRNA [NM_000579]                            |
| A_32_P226149  | 0,7400109  | up   | 1,056493   | 0,07928327 | YWHAZ    | Homo sapiens tyrosine 3-monooxygenase/tryptophan 5-monooxygenase activation protein, zeta (YWHAZ), transcript variant 2, mRNA [NM_145690] |
| A_23_P215060  | 0,65336657 | down | -1,114461  | -0,1563461 | PODXL    | Homo sapiens podocalyxin-like (PODXL), transcript variant 1, mRNA [NM_001018111]                                                          |
| A_23_P215913  | 0,17409953 | up   | 1,5496256  | 0,63191974 | CLU      | Homo sapiens clusterin (CLU), transcript variant 1, mRNA [NM_001831]                                                                      |
| A_33_P3368452 | 0,23594923 | down | -1,2225975 | -0,2899495 | MICA     | Homo sapiens MHC class I polypeptide-related sequence A (MICA), transcript variant 1*001, mRNA [NM_000247]                                |
| A_23_P135248  | 0,5316484  | down | -1,1062382 | -0,1456621 | CCL27    | Homo sapiens chemokine (C-C motif) ligand 27 (CCL27), transcript variant 1, mRNA [NM_006664]                                              |
| A_23_P83328   | 0,4088448  | up   | 1,1786308  | 0,23711191 | ENG      | Homo sapiens endoglin (ENG), transcript variant 2, mRNA [NM_000118]                                                                       |
| A_23_P79999   | 0,6024607  | up   | 1,0743878  | 0,10351481 | ENTPD6   | Homo sapiens ectonucleoside triphosphate diphosphohydrolase 6 (putative) (ENTPD6), transcript variant 1, mRNA [NM_001247]                 |
| A_23_P64372   | 0,422513   | up   | 1,334031   | 0,41579217 | TCN1     | Homo sapiens vitamin B12 binding protein, R binder family (TCN1), mRNA [NM_001062]                                                        |
| A_33_P3296687 | 0,20711632 | up   | 1,5016963  | 0,5865931  | KRT33A   | Homo sapiens keratin 33A, type I (KRT33A), mRNA [NM_004138]                                                                               |
| A_33_P3223592 | 0,05829652 | up   | 2,1168365  | 1,0819099  | APOE     | Homo sapiens apolipoprotein E (APOE), transcript variant 1, mRNA [NM_001302688]                                                           |
| A_24_P314451  | 0,246809   | down | -1,3585433 | -0,4420605 | F8       | Homo sapiens coagulation factor VIII, procoagulant component (F8), transcript variant 1, mRNA [NM_000132]                                 |
| A_23_P81825   | 0,37328508 | up   | 1,2457545  | 0,31701976 | GUCA1B   | Homo sapiens guanylate cyclase activator 1B (retina) (GUCA1B), mRNA [NM_002098]                                                           |
| A_23_P146922  | 0,6807926  | down | -1,1255275 | -0,1706013 | GAS6     | Homo sapiens growth arrest-specific 6 (GAS6), mRNA [NM_000820]                                                                            |
| A_23_P77103   | 0,7574293  | down | -1,1378144 | -0,1862653 | SORD     | Homo sapiens sorbitol dehydrogenase (SORD), transcript variant 1, mRNA [NM_003104]                                                        |
| A_23_P49759   | 0,83808655 | down | -1,1170428 | -0,1596844 | CCL1     | Homo sapiens chemokine (C-C motif) ligand 1 (CCL1), mRNA [NM_002981]                                                                      |
| A_23_P154986  | 0,10760969 | down | -1,7029948 | -0,768074  | GGT1     | Homo sapiens gamma-glutamyltransferase 1 (GGT1), transcript variant 6, mRNA [NM_001288833]                                                |
| A_23_P167168  | 0,21242873 | down | -2,0500662 | -1,0356705 | IGJ      | Homo sapiens immunoglobulin J polypeptide, linker protein for immunoglobulin alpha and mu polypeptides (IGJ), mRNA [NM_144646]            |
| A_33_P3318796 | 0,6682512  | up   | 1,0839313  | 0,11627336 | FSTL3    | Homo sapiens follistatin-like 3 (secreted glycoprotein) (FSTL3), mRNA [NM_005860]                                                         |
| A_23_P88522   | 0,03004017 | up   | 1,4612674  | 0,5472202  | NMB      | Homo sapiens neuromedin B (NMB), transcript variant 1, mRNA [NM_021077]                                                                   |
| A_24_P277367  | 0,10117883 | down | -1,4558461 | -0,5418578 | CXCL5    | Homo sapiens chemokine (C-X-C motif) ligand 5 (CXCL5), mRNA [NM_002994]                                                                   |
| A_23_P39955   | 0,12021077 | down | -1,5656127 | -0,6467273 | ACTG2    | Homo sapiens actin, gamma 2, smooth muscle, enteric (ACTG2), transcript variant 1, mRNA [NM_001615]                                       |
| A_33_P3215953 | 0,37154123 | up   | 1,1244578  | 0,16922957 | MPZL1    | Homo sapiens myelin protein zero-like 1 (MPZL1), transcript variant 2, mRNA [NM_024569]                                                   |
| A_23_P1552    | 0,16138077 | up   | 1,2163559  | 0,28256544 | CTSC     | Homo sapiens cathepsin C (CTSC), transcript variant 1, mRNA [NM_001814]                                                                   |
| A_23_P490060  | 0,10289617 | up   | 1,5221753  | 0,60613453 | SPINT1   | Homo sapiens serine peptidase inhibitor, Kunitz type 1 (SPINT1), transcript variant 1, mRNA [NM_181642]                                   |
| A_23_P70355   | 0,59331805 | down | -1,1144797 | -0,1563703 | SERPINB6 | Homo sapiens serpin peptidase inhibitor, clade B (ovalbumin), member 6 (SERPINB6), transcript variant 1, mRNA [NM_004568]                 |
| A_23_P218237  | 0,15554999 | down | -1,4648284 | -0,5507317 | LCAT     | Homo sapiens lecithin-cholesterol acyltransferase (LCAT), mRNA [NM_000229]                                                                |
| A_24_P763243  | 0,77131945 | up   | 1,048133   | 0,06782182 | EEF1A1   | Homo sapiens eukaryotic translation elongation factor 1 alpha 1 (EEF1A1), mRNA [NM_001402]                                                |
| A_23_P206396  | 0,32583874 | down | -1,1864451 | -0,2466454 | CKLF     | Homo sapiens chemokine-like factor (CKLF), transcript variant 5, mRNA [NM_001040138]                                                      |
| A_24_P79755   | 0,32760873 | down | -1,188512  | -0,2491564 | AKR1A1   | Homo sapiens aldo-keto reductase family 1, member A1 (aldehyde reductase) (AKR1A1), transcript variant 1, mRNA [NM_006066]                |
| A_33_P3397525 | 0,547459   | up   | 1,202754   | 0,26634163 | WNT4     | Homo sapiens wingless-type MMTV integration site family, member 4 (WNT4), mRNA [NM_030761]                                                |
| A_23_P208208  | 0,26661438 | down | -1,2614634 | -0,3350984 | ZNF649   | Homo sapiens zinc finger protein 649 (ZNF649), mRNA [NM_023074]                                                                           |

|               |            |      |            |            |           |                                                                                                                                             |
|---------------|------------|------|------------|------------|-----------|---------------------------------------------------------------------------------------------------------------------------------------------|
| A_24_P753161  | 0,2945364  | up   | 1,1606435  | 0,21492486 | BMPR2     | Homo sapiens bone morphogenetic protein receptor, type II (serine/threonine kinase) (BMPR2), mRNA [NM_001204]                               |
| A_32_P219279  | 0,6382193  | down | -1,1093186 | -0,1496738 | ELFN2     | Homo sapiens extracellular leucine-rich repeat and fibronectin type III domain containing 2 (ELFN2), transcript variant 1, mRNA [NM_052906] |
| A_33_P3400248 | 0,15910931 | down | -2,445487  | -1,2901218 | FGF20     | Homo sapiens fibroblast growth factor 20 (FGF20), mRNA [NM_019851]                                                                          |
| A_33_P3287631 | 0,31214112 | up   | 1,1921048  | 0,2535111  | CTSB      | Homo sapiens cathepsin B (CTSB), transcript variant 2, mRNA [NM_147780]                                                                     |
| A_23_P88331   | 0,5044598  | down | -1,4588065 | -0,5447885 | DLGAP5    | Homo sapiens discs, large (Drosophila) homolog-associated protein 5 (DLGAP5), transcript variant 1, mRNA [NM_014750]                        |
| A_23_P5211    | 0,8683344  | up   | 1,078711   | 0,10930844 | MUC16     | Homo sapiens mucin 16, cell surface associated (MUC16), mRNA [NM_024690]                                                                    |
| A_33_P3292478 | 0,817022   | up   | 1,0344034  | 0,04879898 | CCL16     | chemokine (C-C motif) ligand 16 [Source:HGNC Symbol;Acc:HGNC:10614] [ENST00000621559]                                                       |
| A_23_P169494  | 0,50546277 | up   | 1,1228143  | 0,16711934 | ORM1      | Homo sapiens orosomucoid 1 (ORM1), mRNA [NM_000607]                                                                                         |
| A_23_P107465  | 0,18175405 | up   | 2,0248537  | 1,0178176  | KRT31     | Homo sapiens keratin 31, type I (KRT31), mRNA [NM_002277]                                                                                   |
| A_32_P44316   | 0,70455444 | down | -1,0715923 | -0,0997562 | EEF1A1    | Homo sapiens eukaryotic translation elongation factor 1 alpha 1 (EEF1A1), mRNA [NM_001402]                                                  |
| A_33_P3392250 | 0,42889082 | up   | 1,1532393  | 0,20569184 | FAM178A   | Homo sapiens family with sequence similarity 178, member A (FAM178A), transcript variant 3, mRNA [NM_001243770]                             |
| A_33_P3337771 | 0,34030384 | down | -1,145798  | -0,1963527 | TGS1      | Homo sapiens trimethylguanosine synthase 1 (TGS1), mRNA [NM_024831]                                                                         |
| A_24_P945283  | 0,83303934 | down | -1,0343063 | -0,0486635 | DLG3      | Homo sapiens discs, large homolog 3 (Drosophila) (DLG3), transcript variant 1, mRNA [NM_021120]                                             |
| A_23_P146512  | 0,3159486  | down | -1,278172  | -0,354082  | GOLM1     | Homo sapiens golgi membrane protein 1 (GOLM1), transcript variant 1, mRNA [NM_016548]                                                       |
| A_33_P3327277 | 0,33816817 | down | -1,2510933 | -0,3231894 | VWA2      | Homo sapiens von Willebrand factor A domain containing 2 (VWA2), mRNA [NM_001272046]                                                        |
| A_33_P3219651 | 0,7743134  | up   | 1,1185147  | 0,16158415 | BMPER     | Homo sapiens BMP binding endothelial regulator (BMPER), mRNA [NM_133468]                                                                    |
| A_33_P3243449 | 0,31686118 | down | -1,2199029 | -0,2867663 | CD70      | Homo sapiens CD70 molecule (CD70), mRNA [NM_001252]                                                                                         |
| A_23_P34744   | 0,7772622  | up   | 1,0621364  | 0,08696906 | CTSK      | Homo sapiens cathepsin K (CTSK), mRNA [NM_000396]                                                                                           |
| A_24_P158903  | 0,482201   | up   | 1,1254878  | 0,17055042 | IRAK4     | Homo sapiens interleukin-1 receptor-associated kinase 4 (IRAK4), transcript variant 2, mRNA [NM_016123]                                     |
| A_23_P37441   | 0,514683   | up   | 1,1447972  | 0,19509205 | B2M       | Homo sapiens beta-2-microglobulin (B2M), mRNA [NM_004048]                                                                                   |
| A_33_P3333282 | 0,12141252 | up   | 1,4981747  | 0,5832058  | FGF11     | fibroblast growth factor 11 [Source:HGNC Symbol;Acc:HGNC:3667] [ENST00000293829]                                                            |
| A_33_P3376828 | 0,04572126 | down | -1,4671744 | -0,5530404 | CMTM7     | Homo sapiens CKLF-like MARVEL transmembrane domain containing 7 (CMTM7), transcript variant 1, mRNA [NM_138410]                             |
| A_23_P211631  | 0,8354889  | down | -1,0621327 | -0,086964  | FBLN1     | Homo sapiens fibulin 1 (FBLN1), transcript variant D, mRNA [NM_006486]                                                                      |
| A_23_P87049   | 0,21226119 | down | -1,5901394 | -0,6691532 | SORL1     | Homo sapiens sortilin-related receptor, L(DLR class) A repeats containing (SORL1), mRNA [NM_003105]                                         |
| A_33_P3245278 | 0,0058253  | down | -1,9188375 | -0,9402326 | PTPRG     | Homo sapiens protein tyrosine phosphatase, receptor type, G (PTPRG), mRNA [NM_002841]                                                       |
| A_23_P91390   | 0,6414647  | down | -1,3556178 | -0,4389505 | THBD      | Homo sapiens thrombomodulin (THBD), mRNA [NM_000361]                                                                                        |
| A_23_P312150  | 0,12912509 | up   | 4,6441274  | 2,2154076  | EDN2      | Homo sapiens endothelin 2 (EDN2), transcript variant 1, mRNA [NM_001956]                                                                    |
| A_23_P252236  | 0,5751759  | down | -1,111766  | -0,1528532 | KLKB1     | Homo sapiens kallikrein B, plasma (Fletcher factor) 1 (KLKB1), mRNA [NM_000892]                                                             |
| A_23_P145238  | 0,83970267 | up   | 1,0739201  | 0,1028867  | HIST1H2BK | Homo sapiens histone cluster 1, H2bk (HIST1H2BK), mRNA [NM_080593]                                                                          |
| A_24_P149036  | 0,87256956 | up   | 1,122878   | 0,16720113 | DPYSL3    | Homo sapiens dihydropyrimidinase-like 3 (DPYSL3), transcript variant 2, mRNA [NM_001387]                                                    |
| A_33_P3409854 | 0,59413385 | up   | 1,1135741  | 0,15519762 | LHX1      | Homo sapiens LIM homeobox 1 (LHX1), mRNA [NM_005568]                                                                                        |
| A_33_P3229122 | 0,80134875 | up   | 1,1113844  | 0,15235788 | HIST1H2BF | Homo sapiens histone cluster 1, H2bf (HIST1H2BF), mRNA [NM_003522]                                                                          |
| A_33_P3388501 | 0,35513058 | up   | 1,1442572  | 0,19441135 | CHIT1     | Homo sapiens chitinase 1 (chitotriosidase) (CHIT1), transcript variant 1, mRNA [NM_003465]                                                  |
| A_32_P331052  | 0,01611313 | up   | 1,6718173  | 0,74141717 | RBBP8NL   | Homo sapiens RBBP8 N-terminal like (RBBP8NL), mRNA [NM_080833]                                                                              |
| A_23_P206733  | 0,14200693 | down | -1,80426   | -0,8514072 | CES1      | Homo sapiens carboxylesterase 1 (CES1), transcript variant 3, mRNA [NM_001266]                                                              |
| A_23_P160226  | 0,41863644 | up   | 1,2233518  | 0,29083937 | MROH7     | Homo sapiens maestro heat-like repeat family member 7 (MROH7), transcript variant 1, mRNA [NM_001039464]                                    |
| A_32_P208823  | 0,075186   | up   | 1,7810206  | 0,83270425 | PLXDC1    | Homo sapiens plexin domain containing 1 (PLXDC1), mRNA [NM_020405]                                                                          |
| A_33_P3354464 | 0,01629794 | down | -1,9229503 | -0,9433215 | LOXL1     | Homo sapiens lysyl oxidase-like 1 (LOXL1), mRNA [NM_005576]                                                                                 |
| A_23_P150693  | 0,04646156 | down | -2,274337  | -1,185446  | FJX1      | Homo sapiens four jointed box 1 (Drosophila) (FJX1), mRNA [NM_014344]                                                                       |
| A_33_P3303136 | 0,40984744 | down | -1,1871963 | -0,2475584 | SERPINB6  | Homo sapiens serpin peptidase inhibitor, clade B (ovalbumin), member 6 (SERPINB6), transcript variant 2, mRNA [NM_001195291]                |
| A_33_P3358731 | 0,7676131  | up   | 1,0766618  | 0,10656518 | PCSK5     | Homo sapiens proprotein convertase subtilisin/kexin type 5 (PCSK5), transcript variant 2, mRNA [NM_006200]                                  |
| A_33_P3508822 | 0,1647166  | down | -1,2735553 | -0,3488616 | APP       | Homo sapiens amyloid beta (A4) precursor protein (APP), transcript variant 1, mRNA [NM_000484]                                              |
| A_33_P3354955 | 0,84631157 | up   | 1,0352143  | 0,04992946 | ESF1      | Homo sapiens ESF1, nucleolar pre-rRNA processing protein, homolog (S. cerevisiae) (ESF1), transcript variant 1, mRNA [NM_016649]            |
| A_24_P18270   | 0,5407107  | up   | 1,1572067  | 0,21064653 | UCMA      | Homo sapiens upper zone of growth plate and cartilage matrix associated (UCMA), transcript variant 1, mRNA [NM_145314]                      |
| A_23_P207213  | 0,7141255  | down | -1,1535953 | -0,2061372 | ALDH3A1   | Homo sapiens aldehyde dehydrogenase 3 family, member A1 (ALDH3A1), transcript variant 2, mRNA [NM_000691]                                   |
| A_23_P322     | 0,8859272  | up   | 1,0212367  | 0,03031723 | EFNA4     | Homo sapiens ephrin-A4 (EFNA4), transcript variant 3, mRNA [NM_182690]                                                                      |
| A_33_P3276693 | 0,16173162 | up   | 2,2456715  | 1,1671469  | PGF       | Homo sapiens placental growth factor (PGF), transcript variant 1, mRNA [NM_002632]                                                          |
| A_23_P211212  | 0,294792   | up   | 1,6099277  | 0,68699586 | COL18A1   | Homo sapiens collagen, type XVIII, alpha 1 (COL18A1), transcript variant 1, mRNA [NM_030582]                                                |
| A_33_P3320943 | 0,54102075 | down | -1,1662813 | -0,2219159 |           | Q864S5_BOVIN (Q864S5) Peptidylprolyl isomerase A, partial (97%) [THC2525667]                                                                |
| A_23_P314760  | 0,68341684 | down | -1,1136727 | -0,1553253 | PRKAG2    | Homo sapiens protein kinase, AMP-activated, gamma 2 non-catalytic subunit (PRKAG2), transcript variant a, mRNA [NM_016203]                  |
| A_24_P68783   | 0,02513377 | up   | 5,3425293  | 2,417523   | IL36RN    | Homo sapiens interleukin 36 receptor antagonist (IL36RN), transcript variant 1, mRNA [NM_012275]                                            |
| A_33_P3297907 | 0,6403286  | down | -1,0957144 | -0,1318719 | FGF22     | Homo sapiens fibroblast growth factor 22 (FGF22), transcript variant 1, mRNA [NM_020637]                                                    |
| A_33_P3264163 | 0,36760563 | up   | 1,1609969  | 0,21536413 | DDR1      | Homo sapiens discoidin domain receptor tyrosine kinase 1 (DDR1), transcript variant 5, mRNA [NM_001202522]                                  |
| A_33_P3248265 | 0,41943517 | up   | 1,8373283  | 0,87760943 | LTB       | Homo sapiens lymphotoxin beta (TNF superfamily, member 3) (LTB), transcript variant 1, mRNA [NM_002341]                                     |
| A_33_P3282489 | 0,20226996 | down | -1,2657729 | -0,3400186 | GCNT1     | Homo sapiens glucosaminyl (N-acetyl) transferase 1, core 2 (GCNT1), transcript variant 1, mRNA [NM_001097634]                               |



|                |            |      |            |            |          |                                                                                                                                            |
|----------------|------------|------|------------|------------|----------|--------------------------------------------------------------------------------------------------------------------------------------------|
| A_33_P3339231  | 0,4936046  | down | -1,1175994 | -0,1604031 | UBN2     | Homo sapiens ubinuclein 2 (UBN2), mRNA [NM_173569]                                                                                         |
| A_23_P98282    | 0,1904768  | up   | 1,4292135  | 0,5152215  | SPTBN2   | Homo sapiens spectrin, beta, non-erythrocytic 2 (SPTBN2), mRNA [NM_006946]                                                                 |
| A_23_P145289   | 0,67675734 | down | -1,0470519 | -0,066333  | GNL1     | Homo sapiens guanine nucleotide binding protein-like 1 (GNL1), mRNA [NM_005275]                                                            |
| A_24_P237486   | 0,8846706  | up   | 1,0250686  | 0,03572052 | MECP2    | Homo sapiens methyl CpG binding protein 2 (MECP2), transcript variant 1, mRNA [NM_004992]                                                  |
| A_23_P399078   | 0,5040812  | up   | 1,3113496  | 0,3910524  | TIMP3    | Homo sapiens TIMP metalloproteinase inhibitor 3 (TIMP3), mRNA [NM_000362]                                                                  |
| A_23_P23048    | 0,17997593 | up   | 3,0334513  | 1,6009601  | S100A9   | Homo sapiens S100 calcium binding protein A9 (S100A9), mRNA [NM_002965]                                                                    |
| A_23_P139123   | 0,39480665 | up   | 1,391765   | 0,47691563 | SERPING1 | Homo sapiens serpin peptidase inhibitor, clade G (C1 inhibitor), member 1 (SERPING1), transcript variant 1, mRNA [NM_000062]               |
| A_23_P125977   | 0,23800042 | up   | 1,3745737  | 0,45898426 | C1QC     | Homo sapiens complement component 1, q subcomponent, C chain (C1QC), transcript variant 2, mRNA [NM_172369]                                |
| A_23_P41025    | 0,30016905 | down | -1,234757  | -0,3042271 | GNL3     | Homo sapiens guanine nucleotide binding protein-like 3 (nucleolar) (GNL3), transcript variant 1, mRNA [NM_014366]                          |
| A_33_P3421867  | 0,16666868 | down | -1,3167393 | -0,3969698 | MDGA1    | MAM domain containing glycosylphosphatidylinositol anchor 1 [Source:HGNC Symbol;Acc:HGNC:19267][ENST00000373401]                           |
| A_33_P3260733  | 0,71672213 | down | -1,1153253 | -0,1574646 | GHR      | Homo sapiens growth hormone receptor (GHR), transcript variant 12, mRNA [NM_001242462]                                                     |
| A_24_P245379   | 0,41705942 | up   | 1,4610598  | 0,54701525 | SERPINB2 | Homo sapiens serpin peptidase inhibitor, clade B (ovalbumin), member 2 (SERPINB2), transcript variant 2, mRNA [NM_002575]                  |
| A_23_P201628   | 0,06342369 | down | -1,3214793 | -0,4021539 | LAMC1    | Homo sapiens laminin, gamma 1 (formerly LAMB2) (LAMC1), mRNA [NM_002293]                                                                   |
| A_33_P3288844  | 0,02729388 | down | -1,9047643 | -0,9296125 | IL6R     | Homo sapiens interleukin 6 receptor (IL6R), transcript variant 1, mRNA [NM_000565]                                                         |
| A_33_P3226377  | 0,6712728  | up   | 1,0866351  | 0,11986757 | PRH2     | Homo sapiens proline-rich protein HaeIII subfamily 2 (PRH2), transcript variant 1, mRNA [NM_005042]                                        |
| A_23_P324327   | 0,6899352  | down | -1,0920358 | -0,1270201 | GPRC5B   | Homo sapiens G protein-coupled receptor, class C, group 5, member B (GPRC5B), mRNA [NM_016235]                                             |
| A_23_P103256   | 0,54359174 | up   | 1,1467197  | 0,19751278 | CFHR3    | Homo sapiens complement factor H-related 3 (CFHR3), transcript variant 1, mRNA [NM_021023]                                                 |
| A_33_P3369336  | 0,02780586 | up   | 1,4168198  | 0,5026563  | GCG      | Homo sapiens glucagon (GCG), mRNA [NM_002054]                                                                                              |
| A_33_P3212615  | 0,53849864 | up   | 1,2354282  | 0,30501118 | TFPI     | Homo sapiens tissue factor pathway inhibitor (lipoprotein-associated coagulation inhibitor) (TFPI), transcript variant 1, mRNA [NM_006287] |
| A_33_P3370930  | 0,6187954  | down | -1,0701114 | -0,097761  | LAMB1    | laminin, beta 1 [Source:HGNC Symbol;Acc:HGNC:6486][ENST00000393559]                                                                        |
| A_33_P3220911  | 0,62416285 | up   | 1,1993065  | 0,2622004  | BST2     | Homo sapiens bone marrow stromal cell antigen 2 (BST2), mRNA [NM_004335]                                                                   |
| A_24_P307135   | 0,29662985 | down | -1,266321  | -0,3406431 | TNXB     | Homo sapiens tenascin XB (TNXB), transcript variant XB, mRNA [NM_019105]                                                                   |
| A_23_P315815   | 0,5725917  | down | -1,2741623 | -0,3495491 | NRG1     | Homo sapiens neuregulin 1 (NRG1), transcript variant HRG-gamma, mRNA [NM_004495]                                                           |
| A_23_P141894   | 0,71018136 | up   | 1,069791   | 0,09732892 | PVR      | Homo sapiens poliovirus receptor (PVR), transcript variant 1, mRNA [NM_006505]                                                             |
| A_23_P43164    | 0,32183    | down | -1,7749964 | -0,8278161 | SULF1    | Homo sapiens sulfatase 1 (SULF1), transcript variant 3, mRNA [NM_015170]                                                                   |
| A_23_P212508   | 0,10315022 | up   | 3,4237823  | 1,775591   | TF       | Homo sapiens transferrin (TF), mRNA [NM_001063]                                                                                            |
| A_33_P3287338  | 0,48228914 | down | -1,1217041 | -0,1656922 | IL6ST    | Homo sapiens interleukin 6 signal transducer (IL6ST), transcript variant 3, mRNA [NM_001190981]                                            |
| A_19_P00318098 | 0,21640468 | up   | 1,5337521  | 0,6170653  | DPYSL3   | dihydropyrimidinase-like 3 [Source:HGNC Symbol;Acc:HGNC:3015][ENST00000504965]                                                             |
| A_23_P4714     | 0,55254036 | up   | 1,4125425  | 0,49829423 | MIA      | Homo sapiens melanoma inhibitory activity (MIA), transcript variant 1, mRNA [NM_006533]                                                    |
| A_33_P3315268  | 0,00610401 | up   | 7,7955422  | 2,9626493  | KRT78    | Homo sapiens keratin 78, type II (KRT78), transcript variant 1, mRNA [NM_173352]                                                           |
| A_32_P313405   | 0,3667223  | down | -1,5844754 | -0,6640053 | LAMA1    | Homo sapiens laminin, alpha 1 (LAMA1), mRNA [NM_005559]                                                                                    |
| A_23_P77529    | 0,8515763  | down | -1,0993047 | -0,1365913 | MSLN     | Homo sapiens mesothelin (MSLN), transcript variant 1, mRNA [NM_005823]                                                                     |
| A_23_P96827    | 0,28293958 | up   | 1,1961287  | 0,25837266 | APCS     | Homo sapiens amyloid P component, serum (APCS), mRNA [NM_001639]                                                                           |
| A_23_P204079   | 0,26090446 | up   | 1,2993455  | 0,3777851  | NPFF     | Homo sapiens neuropeptide FF-amide peptide precursor (NPFF), mRNA [NM_003717]                                                              |
| A_23_P412389   | 0,5977709  | up   | 1,1249129  | 0,16981325 | FGF18    | Homo sapiens fibroblast growth factor 18 (FGF18), mRNA [NM_003862]                                                                         |
| A_33_P3363355  | 0,5517719  | down | -1,1841797 | -0,243888  | ICAM4    | Homo sapiens intercellular adhesion molecule 4 (Landsteiner-Wiener blood group) (ICAM4), transcript variant 2, mRNA [NM_022377]            |
| A_23_P27367    | 0,6336555  | down | -1,0713936 | -0,0994886 | KDSR     | Homo sapiens 3-ketodihydroshingosine reductase (KDSR), mRNA [NM_002035]                                                                    |
| A_23_P53588    | 0,0899206  | up   | 1,765761   | 0,8202901  | WNT5B    | Homo sapiens wingless-type MMTV integration site family, member 5B (WNT5B), transcript variant 2, mRNA [NM_030775]                         |
| A_33_P3238433  | 0,77933306 | down | -1,1058673 | -0,1451782 | ALDH3A1  | Homo sapiens aldehyde dehydrogenase 3 family, member A1 (ALDH3A1), transcript variant 1, mRNA [NM_001135168]                               |
| A_33_P3317589  | 0,728849   | up   | 1,0990748  | 0,13628963 | GFRA4    | Homo sapiens GDNF family receptor alpha 4 (GFRA4), transcript variant 2, mRNA [NM_145762]                                                  |
| A_23_P86653    | 0,89961046 | up   | 1,061644   | 0,08630001 | SRGN     | Homo sapiens serglycin (SRGN), transcript variant 1, mRNA [NM_002727]                                                                      |
| A_24_P140608   | 0,7094733  | up   | 1,3242737  | 0,40520132 | HBEGF    | Homo sapiens heparin-binding EGF-like growth factor (HBEGF), mRNA [NM_001945]                                                              |
| A_23_P139722   | 0,17274459 | up   | 1,3230855  | 0,40390635 | TNFRSF1A | Homo sapiens tumor necrosis factor receptor superfamily, member 1A (TNFRSF1A), mRNA [NM_001065]                                            |
| A_33_P3267640  | 0,7926175  | up   | 1,0491235  | 0,06918455 | HGFAC    | Homo sapiens HGF activator (HGFAC), transcript variant 1, mRNA [NM_001297439]                                                              |
| A_23_P166408   | 0,32254505 | down | -1,9829154 | -0,9876231 | OSM      | Homo sapiens oncostatin M (OSM), mRNA [NM_020530]                                                                                          |
| A_23_P3911     | 0,15998138 | up   | 1,9135087  | 0,9362204  | PLXDC1   | Homo sapiens plexin domain containing 1 (PLXDC1), mRNA [NM_020405]                                                                         |
| A_23_P93389    | 0,3873352  | up   | 1,1398274  | 0,18881534 | NUDT3    | Homo sapiens nudix (nucleoside diphosphate linked moiety X)-type motif 3 (NUDT3), mRNA [NM_006703]                                         |
| A_33_P3250680  | 0,25074315 | down | -1,5987526 | -0,6769467 | CD40LG   | Homo sapiens CD40 ligand (CD40LG), mRNA [NM_000074]                                                                                        |
| A_23_P24129    | 0,8464072  | down | -1,1106774 | -0,1514398 | DKK1     | Homo sapiens dickkopf WNT signaling pathway inhibitor 1 (DKK1), mRNA [NM_012242]                                                           |
| A_33_P3422330  | 0,23318166 | up   | 1,4236554  | 0,5096     | KLHL17   | Homo sapiens kelch-like family member 17 (KLHL17), mRNA [NM_198317]                                                                        |
| A_23_P101407   | 0,7148887  | down | -1,2037601 | -0,267548  | C3       | Homo sapiens complement component 3 (C3), mRNA [NM_000064]                                                                                 |
| A_33_P3235701  | 0,42559478 | up   | 1,1847706  | 0,24460772 | ZCCHC11  | zinc finger, CCHC domain containing 11 [Source:HGNC Symbol;Acc:HGNC:28981][ENST00000371541]                                                |
| A_23_P13364    | 0,4619889  | down | -1,2383877 | -0,308463  | NUCB2    | Homo sapiens nucleobindin 2 (NUCB2), mRNA [NM_005013]                                                                                      |
| A_23_P78944    | 0,40498602 | up   | 1,2561333  | 0,3289896  | AMH      | Homo sapiens anti-Mullerian hormone (AMH), mRNA [NM_000479]                                                                                |
| A_23_P425681   | 0,6281339  | up   | 1,2367579  | 0,30656308 | CCK      | Homo sapiens cholecystokinin (CCK), transcript variant 1, mRNA [NM_000729]                                                                 |

|                |            |      |            |            |           |                                                                                                                                                                |
|----------------|------------|------|------------|------------|-----------|----------------------------------------------------------------------------------------------------------------------------------------------------------------|
| A_33_P3226810  | 0,11551698 | up   | 1,3773315  | 0,46187583 | TNFSF10   | Homo sapiens tumor necrosis factor (ligand) superfamily, member 10 (TNFSF10), transcript variant 1, mRNA [NM_003810]                                           |
| A_23_P81058    | 0,01968712 | up   | 2,0667417  | 1,047358   | BMP3      | Homo sapiens bone morphogenetic protein 3 (BMP3), mRNA [NM_001201]                                                                                             |
| A_23_P156327   | 0,3658389  | up   | 1,2536155  | 0,32609493 | TGFB1     | Homo sapiens transforming growth factor, beta-induced, 68kDa (TGFB1), mRNA [NM_000358]                                                                         |
| A_32_P198923   | 0,42816192 | up   | 1,1855522  | 0,24555923 | YWHAZ     | Homo sapiens tyrosine 3-monooxygenase/tryptophan 5-monooxygenase activation protein, zeta (YWHAZ), transcript variant 2, mRNA [NM_145690]                      |
| A_23_P156880   | 0,30850908 | up   | 1,2799122  | 0,3560449  | ENPP1     | Homo sapiens ectonucleotide pyrophosphatase/phosphodiesterase 1 (ENPP1), mRNA [NM_006208]                                                                      |
| A_23_P14174    | 0,29760534 | up   | 1,3391111  | 0,42127565 | TNFSF13B  | Homo sapiens tumor necrosis factor (ligand) superfamily, member 13b (TNFSF13B), transcript variant 1, mRNA [NM_006573]                                         |
| A_33_P3210492  | 0,79684067 | up   | 1,0683253  | 0,09535098 | C1QTNF4   | Homo sapiens C1q and tumor necrosis factor related protein 4 (C1QTNF4), mRNA [NM_031909]                                                                       |
| A_23_P258340   | 0,70052075 | down | -1,0911179 | -0,1258069 | PPIA      | Homo sapiens peptidylprolyl isomerase A (cyclophilin A) (PPIA), transcript variant 1, mRNA [NM_021130]                                                         |
| A_23_P202334   | 0,59628254 | down | -1,1409492 | -0,1902346 | FGFR2     | Homo sapiens fibroblast growth factor receptor 2 (FGFR2), transcript variant 2, mRNA [NM_022970]                                                               |
| A_19_P00319513 | 0,19830039 | up   | 2,1317146  | 1,0920143  | DPYSL3    | dihydropyrimidinase-like 3 [Source:HGNC Symbol;Acc:HGNC:3015] [ENST00000504965]                                                                                |
| A_33_P3234043  | 0,6229614  | up   | 1,1261799  | 0,17143735 | BMP1      | bone morphogenetic protein 1 [Source:HGNC Symbol;Acc:HGNC:1067] [ENST00000471755]                                                                              |
| A_23_P63026    | 0,48780465 | down | -1,1079332 | -0,1478709 | LGALS8    | Homo sapiens lectin, galactoside-binding, soluble, 8 (LGALS8), transcript variant 1, mRNA [NM_006499]                                                          |
| A_23_P353035   | 0,04054946 | down | -3,4431965 | -1,7837485 | IGFBP7    | Homo sapiens insulin-like growth factor binding protein 7 (IGFBP7), transcript variant 1, mRNA [NM_001553]                                                     |
| A_23_P500501   | 0,18789974 | up   | 1,4053963  | 0,49097705 | FGFR3     | Homo sapiens fibroblast growth factor receptor 3 (FGFR3), transcript variant 1, mRNA [NM_000142]                                                               |
| A_33_P3273552  | 0,3216428  | up   | 1,3602248  | 0,44384515 | KRT83     | Homo sapiens keratin 83, type II (KRT83), mRNA [NM_002282]                                                                                                     |
| A_23_P332908   | 0,25670207 | up   | 1,1746821  | 0,23227042 | ZFC3H1    | Homo sapiens zinc finger, C3H1-type containing (ZFC3H1), mRNA [NM_144982]                                                                                      |
| A_23_P137856   | 0,5007751  | up   | 1,1757376  | 0,23356614 | MUC1      | Homo sapiens mucin 1, cell surface associated (MUC1), transcript variant 1, mRNA [NM_002456]                                                                   |
| A_24_P339944   | 0,7148521  | up   | 1,0949467  | 0,1308607  | PDGFB     | Homo sapiens platelet-derived growth factor beta polypeptide (PDGFB), transcript variant 1, mRNA [NM_002608]                                                   |
| A_23_P254888   | 0,4620465  | up   | 1,2417725  | 0,3124009  | ZYX       | Homo sapiens zyxin (ZYX), transcript variant 1, mRNA [NM_003461]                                                                                               |
| A_23_P167096   | 0,67867744 | down | -1,1418498 | -0,1913728 | VEGFC     | Homo sapiens vascular endothelial growth factor C (VEGFC), mRNA [NM_005429]                                                                                    |
| A_33_P3392784  | 0,06916725 | down | -4,098004  | -2,0349214 | CFAP58    | cilia and flagella associated protein 58 [Source:HGNC Symbol;Acc:HGNC:26676] [ENST00000369703]                                                                 |
| A_23_P310956   | 0,63448954 | up   | 1,1571814  | 0,21061501 | COL6A2    | Homo sapiens collagen, type VI, alpha 2 (COL6A2), transcript variant 2C2a', mRNA [NM_058175]                                                                   |
| A_33_P3344574  | 0,71975523 | up   | 1,0628513  | 0,08793978 | SFTPA2    | Homo sapiens surfactant protein A2 (SFTPA2), mRNA [NM_001098668]                                                                                               |
| A_23_P3361457  | 0,53797287 | down | -1,1191777 | -0,1624391 | IFNAR2    | Homo sapiens interferon (alpha, beta and omega) receptor 2 (IFNAR2), transcript variant 2, mRNA [NM_000874]                                                    |
| A_23_P12680    | 0,8358009  | down | -1,0347131 | -0,0492309 | PSAP      | Homo sapiens prosaposin (PSAP), transcript variant 2, mRNA [NM_001042465]                                                                                      |
| A_23_P150064   | 0,42311317 | down | -1,2982322 | -0,3765484 | MMRN2     | Homo sapiens multimerin 2 (MMRN2), mRNA [NM_024756]                                                                                                            |
| A_33_P3364864  | 0,08727159 | up   | 1,3592782  | 0,44284075 | NAMPT     | Homo sapiens nicotinamide phosphoribosyltransferase (NAMPT), mRNA [NM_005746]                                                                                  |
| A_23_P252471   | 0,4986255  | up   | 1,2662011  | 0,34050658 | PECAM1    | Homo sapiens platelet/endothelial cell adhesion molecule 1 (PECAM1), mRNA [NM_000442]                                                                          |
| A_24_P65616    | 0,67105025 | down | -1,1403714 | -0,1895038 | PVR       | Homo sapiens poliovirus receptor (PVR), transcript variant 1, mRNA [NM_006505]                                                                                 |
| A_23_P166269   | 0,17025042 | up   | 1,5054346  | 0,59018004 | FAM3B     | Homo sapiens family with sequence similarity 3, member B (FAM3B), transcript variant 1, mRNA [NM_058186]                                                       |
| A_23_P76291    | 0,23909448 | down | -3,5364652 | -1,8223081 | PRR4      | Homo sapiens proline rich 4 (lacrimal) (PRR4), transcript variant 2, mRNA [NM_007244]                                                                          |
| A_24_P169148   | 0,42629266 | down | -1,1645213 | -0,2197371 | HMGB1     | Homo sapiens high mobility group box 1 (HMGB1), mRNA [NM_002128]                                                                                               |
| A_23_P200780   | 0,21727552 | down | -1,4836625 | -0,5691629 | TGFB3     | Homo sapiens transforming growth factor, beta receptor III (TGFB3), transcript variant 1, mRNA [NM_003243]                                                     |
| A_23_P15357    | 0,8907732  | up   | 1,0179379  | 0,02564955 | LGALS3BP  | Homo sapiens lectin, galactoside-binding, soluble, 3 binding protein (LGALS3BP), mRNA [NM_005567]                                                              |
| A_33_P3279019  | 0,38518643 | up   | 1,5907942  | 0,6697472  | SERPINB13 | Homo sapiens serpin peptidase inhibitor, clade B (ovalbumin), member 13 (SERPINB13), mRNA [NM_012397]                                                          |
| A_24_P928052   | 0,17805254 | down | -1,4466212 | -0,5326872 | NRP1      | Homo sapiens neuropilin 1 (NRP1), transcript variant 1, mRNA [NM_003873]                                                                                       |
| A_24_P45476    | 0,22676674 | up   | 1,9635175  | 0,97344047 | XCL1      | Homo sapiens chemokine (C motif) ligand 1 (XCL1), mRNA [NM_002995]                                                                                             |
| A_23_P157580   | 0,58523315 | up   | 1,0961167  | 0,13240135 | SDCBP     | Homo sapiens syndecan binding protein (syntenin) (SDCBP), transcript variant 1, mRNA [NM_005625]                                                               |
| A_23_P166459   | 0,09492316 | up   | 1,4689919  | 0,55482644 | LGALS1    | Homo sapiens lectin, galactoside-binding, soluble, 1 (LGALS1), mRNA [NM_002305]                                                                                |
| A_23_P88404    | 0,1788001  | down | -1,396456  | -0,4817701 | TGFB3     | Homo sapiens transforming growth factor, beta 3 (TGFB3), mRNA [NM_003239]                                                                                      |
| A_24_P406754   | 0,51376194 | up   | 1,2734305  | 0,3487202  | LOXL4     | Homo sapiens lysyl oxidase-like 4 (LOXL4), mRNA [NM_032211]                                                                                                    |
| A_23_P64825    | 0,4172175  | up   | 1,2832594  | 0,35981283 | LACRT     | Homo sapiens lacritin (LACRT), mRNA [NM_033277]                                                                                                                |
| A_33_P3278407  | 0,01649434 | up   | 1,5588454  | 0,64047784 | MLLT4     | Homo sapiens myeloid/lymphoid or mixed-lineage leukemia (trithorax homolog, Drosophila); translocated to, 4 (MLLT4), transcript variant 1, mRNA [NM_001207008] |
| A_24_P264943   | 0,88884264 | down | -1,0778449 | -0,1081495 | COMP      | Homo sapiens cartilage oligomeric matrix protein (COMP), mRNA [NM_000095]                                                                                      |
| A_33_P3209885  | 0,14428182 | up   | 1,550408   | 0,63264793 | PLXDC1    | Homo sapiens plexin domain containing 1 (PLXDC1), mRNA [NM_020405]                                                                                             |
| A_23_P40453    | 0,19224717 | up   | 1,3783336  | 0,46292508 | CBR3      | Homo sapiens carbonyl reductase 3 (CBR3), mRNA [NM_001236]                                                                                                     |
| A_33_P3355732  | 0,5126353  | up   | 1,2740101  | 0,34937668 | UOMODL1   | uromodulin-like 1 [Source:HGNC Symbol;Acc:HGNC:12560] [ENST00000491559]                                                                                        |
| A_23_P154894   | 0,30575055 | up   | 1,4495335  | 0,5355886  | CSTB      | Homo sapiens cystatin B (stefin B) (CSTB), mRNA [NM_000100]                                                                                                    |
| A_24_P131589   | 0,78418607 | up   | 1,1624992  | 0,21722971 | CD86      | Homo sapiens CD86 molecule (CD86), transcript variant 2, mRNA [NM_006889]                                                                                      |
| A_23_P82868    | 0,46300036 | up   | 1,7205366  | 0,78285855 | PLAT      | Homo sapiens plasminogen activator, tissue (PLAT), transcript variant 1, mRNA [NM_000930]                                                                      |
| A_33_P3417281  | 0,04972186 | up   | 1,826427   | 0,86902404 | MUC4      | Homo sapiens mucin 4, cell surface associated (MUC4), transcript variant 1, mRNA [NM_018406]                                                                   |
| A_23_P135257   | 0,0812021  | up   | 4,878136   | 2,28633    | PRSS3     | Homo sapiens protease, serine, 3 (PRSS3), transcript variant 2, mRNA [NM_002771]                                                                               |
| A_23_P374844   | 0,5192312  | up   | 1,4173948  | 0,5032416  | GAL       | Homo sapiens galanin/GMAP prepropeptide (GAL), mRNA [NM_015973]                                                                                                |
| A_23_P100660   | 0,06556968 | down | -1,4921538 | -0,5773962 | SERPINF1  | Homo sapiens serpin peptidase inhibitor, clade F (alpha-2 antiplasmin, pigment epithelium derived factor), member 1 (SERPINF1), mRNA [NM_002615]               |
| A_32_P148345   | 0,09021471 | down | -1,4834237 | -0,5689308 | ANXA2     | Homo sapiens annexin A2 (ANXA2), transcript variant 2, mRNA [NM_001002857]                                                                                     |

|               |            |      |            |            |           |                                                                                                                                                               |
|---------------|------------|------|------------|------------|-----------|---------------------------------------------------------------------------------------------------------------------------------------------------------------|
| A_33_P3251163 | 0,38399193 | up   | 1,2804784  | 0,35668287 | RNASET2   | ribonuclease T2 [Source:HGNC Symbol;Acc:HGNC:21686] [ENST00000510083]                                                                                         |
| A_33_P3415820 | 0,7729727  | down | -1,046976  | -0,0662283 | THBS1     | Homo sapiens thrombospondin 1 (THBS1), mRNA [NM_003246]                                                                                                       |
| A_33_P3279470 | 0,02771314 | up   | 1,5834537  | 0,6630746  | AGRP      | Homo sapiens agouti related neuropeptide (AGRP), mRNA [NM_0011138]                                                                                            |
| A_23_P341275  | 0,7813802  | down | -1,06148   | -0,0860773 | POP1      | Homo sapiens processing of precursor 1, ribonuclease P/MRP subunit (S. cerevisiae) (POP1), transcript variant 3, mRNA [NM_015029]                             |
| A_33_P3404601 | 0,67609966 | up   | 1,1612985  | 0,21573886 | C2        | Homo sapiens complement component 2 (C2), transcript variant 5, mRNA [NM_001282458]                                                                           |
| A_23_P130411  | 0,5747141  | up   | 1,2717346  | 0,34679762 | SERPINB11 | Homo sapiens serpin peptidase inhibitor, clade B (ovalbumin), member 11 (gene/pseudogene) (SERPINB11), transcript variant 1, mRNA [NM_080475]                 |
| A_23_P218442  | 0,07414685 | up   | 1,4950187  | 0,58016354 | CEACAM6   | Homo sapiens carcinoembryonic antigen-related cell adhesion molecule 6 (non-specific cross reacting antigen) (CEACAM6), mRNA [NM_002483]                      |
| A_23_P5983    | 0,48061553 | down | -1,1980724 | -0,2607151 | PLTP      | Homo sapiens phospholipid transfer protein (PLTP), transcript variant 1, mRNA [NM_006227]                                                                     |
| A_32_P75792   | 0,211908   | up   | 1,6145357  | 0,6911193  | FAM132A   | Homo sapiens family with sequence similarity 132, member A (FAM132A), mRNA [NM_001014980]                                                                     |
| A_23_P58396   | 0,2918754  | down | -1,4170042 | -0,502844  | PDGFC     | Homo sapiens platelet derived growth factor C (PDGFC), transcript variant 1, mRNA [NM_016205]                                                                 |
| A_24_P246943  | 0,8268626  | down | -1,047952  | -0,0675727 | PPIA      | Homo sapiens peptidylprolyl isomerase A (cyclophilin A) (PPIA), transcript variant 1, mRNA [NM_021130]                                                        |
| A_24_P135322  | 0,8332009  | down | -1,0810416 | -0,112422  | NRP1      | Homo sapiens neuropilin 1 (NRP1), transcript variant 3, mRNA [NM_001024629]                                                                                   |
| A_33_P3245289 | 0,1772392  | down | -1,2919532 | -0,3695538 | PTPRG     | Homo sapiens protein tyrosine phosphatase, receptor type, G (PTPRG), mRNA [NM_002841]                                                                         |
| A_23_P166848  | 0,399466   | down | -2,8870006 | -1,5295714 | LTF       | Homo sapiens lactotransferrin (LTF), transcript variant 1, mRNA [NM_002343]                                                                                   |
| A_23_P207336  | 0,08342782 | up   | 1,3269726  | 0,40813857 | PPY       | Homo sapiens pancreatic polypeptide (PPY), mRNA [NM_002722]                                                                                                   |
| A_23_P97541   | 0,6846668  | up   | 1,125375   | 0,17040586 | C4BPA     | Homo sapiens complement component 4 binding protein, alpha (C4BPA), mRNA [NM_000715]                                                                          |
| A_23_P152838  | 0,41842166 | up   | 1,7097474  | 0,7737832  | CCL5      | Homo sapiens chemokine (C-C motif) ligand 5 (CCL5), transcript variant 1, mRNA [NM_002985]                                                                    |
| A_33_P3232692 | 0,32710996 | down | -1,2292585 | -0,2977884 | IL24      | Homo sapiens interleukin 24 (IL24), transcript variant 3, mRNA [NM_001185156]                                                                                 |
| A_23_P208389  | 0,2528569  | up   | 1,2489104  | 0,32067    | AXL       | Homo sapiens AXL receptor tyrosine kinase (AXL), transcript variant 1, mRNA [NM_021913]                                                                       |
| A_23_P254741  | 0,80590963 | down | -1,1286623 | -0,174614  | SOD3      | Homo sapiens superoxide dismutase 3, extracellular (SOD3), mRNA [NM_003102]                                                                                   |
| A_33_P3306146 | 0,782985   | up   | 1,1264809  | 0,17182289 | PLAU      | Homo sapiens plasminogen activator, urokinase (PLAU), transcript variant 2, mRNA [NM_001145031]                                                               |
| A_23_P150950  | 0,50691134 | down | -1,1297121 | -0,1759552 | ZFC3H1    | Homo sapiens zinc finger, C3H1-type containing (ZFC3H1), mRNA [NM_144982]                                                                                     |
| A_33_P3365878 | 0,83042586 | up   | 1,0417548  | 0,0590158  | BMP8B     | Homo sapiens bone morphogenetic protein 8b (BMP8B), mRNA [NM_001720]                                                                                          |
| A_23_P211080  | 0,35480762 | down | -1,1863668 | -0,2465501 | IFNAR2    | Homo sapiens interferon (alpha, beta and omega) receptor 2 (IFNAR2), transcript variant 1, mRNA [NM_207585]                                                   |
| A_23_P48886   | 0,82427925 | up   | 1,0402596  | 0,0569436  | ADAM10    | Homo sapiens ADAM metallopeptidase domain 10 (ADAM10), mRNA [NM_001110]                                                                                       |
| A_23_P47168   | 0,3218121  | up   | 1,2555804  | 0,32835445 | FLRT1     | Homo sapiens fibronectin leucine rich transmembrane protein 1 (FLRT1), mRNA [NM_013280]                                                                       |
| A_33_P3257708 | 0,601292   | up   | 1,062058   | 0,08686252 | APOA1BP   | Homo sapiens apolipoprotein A-I binding protein (APOA1BP), mRNA [NM_144772]                                                                                   |
| A_23_P57268   | 0,37170762 | down | -1,130142  | -0,176504  | CXADR     | Homo sapiens coxsackie virus and adenovirus receptor (CXADR), transcript variant 1, mRNA [NM_001338]                                                          |
| A_33_P3377199 | 0,38406757 | down | -1,1660303 | -0,2216053 | PRDX1     | Homo sapiens peroxiredoxin 1 (PRDX1), transcript variant 1, mRNA [NM_002574]                                                                                  |
| A_32_P84009   | 0,5457338  | down | -1,1413605 | -0,1907546 | CMTM4     | Homo sapiens CKLF-like MARVEL transmembrane domain containing 4 (CMTM4), transcript variant 2, mRNA [NM_181521]                                               |
| A_23_P363769  | 0,21359558 | up   | 1,300237   | 0,37877467 | KRT86     | Homo sapiens keratin 86, type II (KRT86), mRNA [NM_002284]                                                                                                    |
| A_23_P149545  | 0,08260971 | down | -1,9892255 | -0,9922068 | HIST2H2BE | Homo sapiens histone cluster 2, H2be (HIST2H2BE), mRNA [NM_003528]                                                                                            |
| A_24_P289471  | 0,7866835  | up   | 1,070498   | 0,09828208 | RNASET2   | Homo sapiens ribonuclease T2 (RNASET2), mRNA [NM_003730]                                                                                                      |
| A_33_P3337540 | 0,78704554 | down | -1,0575761 | -0,0807614 | IFNAR2    | Homo sapiens interferon (alpha, beta and omega) receptor 2 (IFNAR2), transcript variant 2, mRNA [NM_000874]                                                   |
| A_33_P3370940 | 0,40496472 | down | -1,2892385 | -0,3665191 | LAMB1     | Homo sapiens laminin, beta 1, mRNA (cDNA clone IMAGE:4889995), containing frame-shift errors. [BC044633]                                                      |
| A_33_P3358898 | 0,35263056 | down | -1,4916198 | -0,5768799 | SSC5D     | Homo sapiens scavenger receptor cysteine rich family, 5 domains (SSC5D), transcript variant 1, mRNA [NM_001144950]                                            |
| A_23_P167920  | 0,04407441 | down | -1,7650563 | -0,8197141 | DLL1      | Homo sapiens delta-like 1 (Drosophila) (DLL1), mRNA [NM_005618]                                                                                               |
| A_24_P147461  | 0,4505406  | up   | 1,229543   | 0,29812214 | SERPINB8  | Homo sapiens serpin peptidase inhibitor, clade B (ovalbumin), member 8 (SERPINB8), transcript variant 3, mRNA [NM_001031848]                                  |
| A_24_P203953  | 0,40182003 | down | -1,1891787 | -0,2499655 | LOC439951 | PREDICTED: Homo sapiens uncharacterized LOC439951 (LOC439951), misc_RNA [XR_171055]                                                                           |
| A_33_P3211569 | 0,45830736 | up   | 1,25475    | 0,32739997 | ERBB3     | Homo sapiens v-erb-b2 avian erythroblastic leukemia viral oncogene homolog 3 (ERBB3), transcript variant s, mRNA [NM_001005915]                               |
| A_33_P3229288 | 0,560481   | up   | 1,1168926  | 0,15949044 | ACE       | Homo sapiens angiotensin I converting enzyme (ACE), transcript variant 1, mRNA [NM_000789]                                                                    |
| A_23_P156683  | 0,5221715  | up   | 1,0964736  | 0,13287105 | LTA       | Homo sapiens lymphotoxin alpha (LTA), transcript variant 2, mRNA [NM_000595]                                                                                  |
| A_33_P3248903 | 0,8938944  | up   | 1,0326307  | 0,04632437 | WNT7B     | Homo sapiens wingless-type MMTV integration site family, member 7B (WNT7B), mRNA [NM_058238]                                                                  |
| A_23_P12463   | 0,01256869 | up   | 1,6320908  | 0,7067213  | QSOX1     | Homo sapiens quiesc Q6 sulfhydryl oxidase 1 (QSOX1), transcript variant 1, mRNA [NM_002826]                                                                   |
| A_32_P195065  | 0,77226883 | up   | 1,06297    | 0,08810094 | SEMA4F    | Homo sapiens sema domain, immunoglobulin domain (Ig), transmembrane domain (TM) and short cytoplasmic domain, (semaphorin) 4F (SEMA4F), transcript variant 1, |
| A_23_P69329   | 0,09345559 | up   | 1,5384706  | 0,6214969  | HYAL1     | Homo sapiens hyaluronoglucosaminidase 1 (HYAL1), transcript variant 8, mRNA [NM_153281]                                                                       |
| A_33_P3271455 | 0,4886536  | up   | 1,530412   | 0,61392003 | PXDN      | Homo sapiens peroxidasin (PXDN), mRNA [NM_012293]                                                                                                             |
| A_23_P46429   | 0,5342439  | up   | 1,2263309  | 0,29434827 | CYR61     | Homo sapiens cysteine-rich, angiogenic inducer, 61 (CYR61), mRNA [NM_001554]                                                                                  |
| A_23_P250122  | 0,4385786  | up   | 1,1916096  | 0,2529117  | FAM20C    | Homo sapiens family with sequence similarity 20, member C (FAM20C), mRNA [NM_020223]                                                                          |
| A_23_P2271    | 0,30061272 | up   | 2,175163   | 1,1211236  | PTHLH     | Homo sapiens parathyroid hormone-like hormone (PTHLH), transcript variant 1, mRNA [NM_198965]                                                                 |
| A_23_P141035  | 0,3193095  | up   | 1,3223356  | 0,40308836 | CHST4     | Homo sapiens carbohydrylate (N-acetylglucosamine 6-O) sulfotransferase 4 (CHST4), transcript variant 1, mRNA [NM_005769]                                      |
| A_24_P403459  | 0,3384892  | up   | 1,350377   | 0,4333622  | IFNA4     | Homo sapiens interferon, alpha 4 (IFNA4), mRNA [NM_021068]                                                                                                    |
| A_33_P3229725 | 0,70838434 | up   | 1,0654877  | 0,09151399 | ARSA      | Homo sapiens arylsulfatase A (ARSA), transcript variant 1, mRNA [NM_000487]                                                                                   |
| A_33_P3284933 | 0,03730639 | up   | 1,5675653  | 0,64852554 | IL27      | Homo sapiens interleukin 27 (IL27), mRNA [NM_145659]                                                                                                          |
| A_23_P6066    | 0,3056764  | down | -1,409414  | -0,4950955 | CPXM1     | Homo sapiens carboxypeptidase X (M14 family), member 1 (CPXM1), transcript variant 1, mRNA [NM_019609]                                                        |

|                |            |      |            |            |           |                                                                                                                                                                                        |
|----------------|------------|------|------------|------------|-----------|----------------------------------------------------------------------------------------------------------------------------------------------------------------------------------------|
| A_23_P49975    | 0,16970846 | up   | 1,8850211  | 0,91458064 | KRT10     | Homo sapiens keratin 10, type I (KRT10), mRNA [NM_000421]                                                                                                                              |
| A_23_P256375   | 0,2590375  | up   | 1,1824397  | 0,24176659 | STX4      | Homo sapiens syntaxin 4 (STX4), transcript variant 3, mRNA [NM_004604]                                                                                                                 |
| A_24_P306726   | 0,5124587  | up   | 1,0962893  | 0,13262853 | TPT1      | Homo sapiens tumor protein, translationally-controlled 1 (TPT1), transcript variant 2, mRNA [NM_003295]                                                                                |
| A_23_P160968   | 0,03965978 | down | -1,5767262 | -0,6569322 | LAMC2     | Homo sapiens laminin, gamma 2 (LAMC2), transcript variant 2, mRNA [NM_018891]                                                                                                          |
| A_33_P3246883  | 0,6641942  | down | -1,2283037 | -0,2966673 | DMKN      | Homo sapiens dermokine (DMKN), transcript variant 2, mRNA [NM_033317]                                                                                                                  |
| A_33_P3349637  | 0,23895086 | up   | 1,4078681  | 0,4935122  | PCDH1     | Homo sapiens protocadherin 1 (PCDH1), transcript variant 1, mRNA [NM_002587]                                                                                                           |
| A_23_P363968   | 0,6078001  | up   | 1,075781   | 0,1053844  | C1RL      | Homo sapiens complement component 1, r subcomponent-like (C1RL), transcript variant 1, mRNA [NM_016546]                                                                                |
| A_33_P3376007  | 0,6619983  | up   | 1,0640554  | 0,08957332 | TXLNA     | Homo sapiens taxilin alpha (TXLNA), mRNA [NM_175852]                                                                                                                                   |
| A_33_P3229246  | 0,5100732  | down | -1,1988593 | -0,2616624 | HIST2H2BE | Homo sapiens histone cluster 2, H2be (HIST2H2BE), mRNA [NM_003528]                                                                                                                     |
| A_33_P3338698  | 0,01840872 | down | -2,785691  | -1,4780352 | IHH       | Homo sapiens indian hedgehog (IHH), mRNA [NM_002181]                                                                                                                                   |
| A_33_P3217559  | 0,38355747 | up   | 1,1524204  | 0,2046671  | DLK1      | Homo sapiens delta-like 1 homolog (Drosophila) (DLK1), mRNA [NM_003836]                                                                                                                |
| A_23_P41344    | 0,20410588 | up   | 3,2787044  | 1,7131258  | EREG      | Homo sapiens epiregulin (EREG), mRNA [NM_001432]                                                                                                                                       |
| A_33_P3259878  | 0,21063653 | up   | 1,2513833  | 0,32352376 | DDB1      | damage-specific DNA binding protein 1, 127kDa [Source:HGNC Symbol;Acc:HGNC:2717] [ENST00000545894]                                                                                     |
| A_23_P405873   | 0,35305727 | down | -1,3683999 | -0,4524899 | C9orf72   | Homo sapiens chromosome 9 open reading frame 72 (C9orf72), transcript variant 1, mRNA [NM_145005]                                                                                      |
| A_23_P21838    | 0,02033575 | up   | 1,3721757  | 0,4564652  | CNP       | Homo sapiens 2',3'-cyclic nucleotide 3' phosphodiesterase (CNP), mRNA [NM_033133]                                                                                                      |
| A_23_P119916   | 0,632728   | down | -1,1393204 | -0,1881735 | WNT6      | Homo sapiens wingless-type MMTV integration site family, member 6 (WNT6), mRNA [NM_006522]                                                                                             |
| A_24_P333697   | 0,0683104  | up   | 5,4190063  | 2,4380283  | KLK13     | Homo sapiens kallikrein-related peptidase 13 (KLK13), mRNA [NM_015596]                                                                                                                 |
| A_23_P320261   | 0,7880974  | down | -1,1250305 | -0,1699641 | DMKN      | Homo sapiens dermokine (DMKN), transcript variant 1, mRNA [NM_001035516]                                                                                                               |
| A_23_P128919   | 0,10295703 | up   | 1,3114893  | 0,3912061  | LGALS3    | Homo sapiens lectin, galactoside-binding, soluble, 3 (LGALS3), transcript variant 1, mRNA [NM_002306]                                                                                  |
| A_23_P502470   | 0,4368551  | down | -1,1550024 | -0,2078958 | IL6ST     | Homo sapiens interleukin 6 signal transducer (IL6ST), transcript variant 1, mRNA [NM_002184]                                                                                           |
| A_23_P129556   | 0,4955782  | up   | 1,2267578  | 0,2948504  | IL4R      | Homo sapiens interleukin 4 receptor (IL4R), transcript variant 1, mRNA [NM_000418]                                                                                                     |
| A_33_P3282018  | 0,4284756  | up   | 1,2137663  | 0,2794907  | MCF2L     | Homo sapiens MCF.2 cell line derived transforming sequence-like (MCF2L), transcript variant 2, mRNA [NM_024979]                                                                        |
| A_23_P259071   | 0,29842657 | up   | 1,9589301  | 0,97006595 | AREG      | Homo sapiens amphiregulin (AREG), mRNA [NM_001657]                                                                                                                                     |
| A_23_P144959   | 0,02631055 | down | -2,1505022 | -1,1046736 | VCAN      | Homo sapiens versican (VCAN), transcript variant 1, mRNA [NM_004385]                                                                                                                   |
| A_23_P102611   | 0,79480326 | up   | 1,1460239  | 0,1966371  | WISP2     | Homo sapiens WNT1 inducible signaling pathway protein 2 (WISP2), mRNA [NM_003881]                                                                                                      |
| A_24_P354689   | 0,04596365 | up   | 2,2133596  | 1,1462379  | SPOCK1    | Homo sapiens sparco/osteonectin, cwcv and kazal-like domains proteoglycan (testican) 1 (SPOCK1), mRNA [NM_004598]                                                                      |
| A_23_P334021   | 0,5739936  | down | -1,0969574 | -0,1335076 | IGF2R     | Homo sapiens insulin-like growth factor 2 receptor (IGF2R), mRNA [NM_000876]                                                                                                           |
| A_33_P3389286  | 0,38915217 | up   | 1,5072012  | 0,591872   | SFN       | Homo sapiens stratifin (SFN), mRNA [NM_006142]                                                                                                                                         |
| A_23_P500010   | 0,01925241 | up   | 15,19849   | 3,925856   | KLK12     | Homo sapiens kallikrein-related peptidase 12 (KLK12), transcript variant 2, mRNA [NM_145894]                                                                                           |
| A_23_P153676   | 0,5263597  | up   | 1,2131788  | 0,27879214 | TLE2      | Homo sapiens transducin-like enhancer of split 2 (TLE2), transcript variant 1, mRNA [NM_003260]                                                                                        |
| A_33_P3406240  | 0,73250276 | up   | 1,0974377  | 0,13413909 | GDF7      | Homo sapiens growth differentiation factor 7 (GDF7), mRNA [NM_182828]                                                                                                                  |
| A_33_P3358745  | 0,16514464 | up   | 1,16514464 | 0,80352294 | SEPP1     | Homo sapiens selenoprotein P, plasma, 1 (SEPP1), transcript variant 3, mRNA [NM_001093726]                                                                                             |
| A_32_P77977    | 0,13513838 | down | -1,3085747 | -0,3879963 | UTP11L    | Homo sapiens UTP11-like, U3 small nucleolar ribonucleoprotein (yeast) (UTP11L), mRNA [NM_016037]                                                                                       |
| A_23_P138524   | 0,82496345 | up   | 1,1494     | 0,20088094 | CPXM2     | Homo sapiens carboxypeptidase X (M14 family), member 2 (CPXM2), mRNA [NM_198148]                                                                                                       |
| A_33_P3235776  | 0,04874857 | down | -1,4853683 | -0,5708206 | FAM184A   | Homo sapiens mRNA; cDNA DKFzp686I01262 (from clone DKFzp686I01262). [BX640728]                                                                                                         |
| A_24_P234838   | 0,24969636 | up   | 1,23346    | 0,30271086 | PCDH1     | Homo sapiens protocadherin 1 (PCDH1), transcript variant 2, mRNA [NM_032420]                                                                                                           |
| A_23_P158775   | 0,5717862  | up   | 1,0727072  | 0,1012563  | UMOD      | Homo sapiens uromodulin (UMOD), transcript variant 1, mRNA [NM_003361]                                                                                                                 |
| A_23_P144348   | 0,2556927  | down | -1,3358827 | -0,4177933 | SLIT2     | Homo sapiens slit homolog 2 (Drosophila) (SLIT2), transcript variant 1, mRNA [NM_004787]                                                                                               |
| A_33_P3382177  | 0,01308363 | up   | 1,9477427  | 0,9618031  | TIMP2     | Homo sapiens TIMP metalloproteinase inhibitor 2 (TIMP2), mRNA [NM_003255]                                                                                                              |
| A_33_P3250398  | 0,7583395  | up   | 1,1204563  | 0,16408643 | CTSZ      | cathepsin Z [Source:HGNC Symbol;Acc:HGNC:2547] [ENST00000503833]                                                                                                                       |
| A_23_P156687   | 0,4163314  | up   | 1,3588357  | 0,442371   | CFB       | Homo sapiens complement factor B (CFB), mRNA [NM_001710]                                                                                                                               |
| A_23_P34433    | 0,2762636  | down | -1,2183589 | -0,2849391 | ZCCHC11   | Homo sapiens zinc finger, CCHC domain containing 11 (ZCCHC11), transcript variant 1, mRNA [NM_001009881]                                                                               |
| A_23_P26325    | 0,75672626 | down | -1,1119218 | -0,1530553 | CCL17     | Homo sapiens chemokine (C-C motif) ligand 17 (CCL17), mRNA [NM_002987]                                                                                                                 |
| A_33_P3372727  | 0,07576662 | down | -1,691796  | -0,7585555 | SEMA5A    | Homo sapiens sema domain, seven thrombospondin repeats (type 1 and type 1-like), transmembrane domain (TM) and short cytoplasmic domain, (semaphorin) 5A (SEMA5A), mRNA [NM_001009881] |
| A_33_P3419190  | 0,28170082 | up   | 1,9492501  | 0,9629192  | AREG      | Homo sapiens amphiregulin (AREG), mRNA [NM_001657]                                                                                                                                     |
| A_32_P64200    | 0,8206922  | down | -1,0534322 | -0,0750975 | GUCA1B    | Homo sapiens guanylate cyclase activator 1B (retina) (GUCA1B), mRNA [NM_002098]                                                                                                        |
| A_23_P303145   | 0,30297124 | down | -1,2815291 | -0,3578662 | FGFR2     | fibroblast growth factor receptor 2 [Source:HGNC Symbol;Acc:HGNC:3689] [ENST00000359354]                                                                                               |
| A_33_P3406962  | 0,57639    | up   | 1,1361437  | 0,1841453  | GATA4     | GATA binding protein 4 [Source:HGNC Symbol;Acc:HGNC:4173] [ENST00000532977]                                                                                                            |
| A_19_P00800682 | 0,74428135 | up   | 1,0662414  | 0,09253408 | RDX       | Homo sapiens radixin (RDX), transcript variant 1, mRNA [NM_001260492]                                                                                                                  |
| A_23_P89270    | 0,11842229 | down | -1,2449404 | -0,3160767 | SERPINF2  | Homo sapiens serpin peptidase inhibitor, clade F (alpha-2 antiplasmin, pigment epithelium derived factor), member 2 (SERPINF2), transcript variant 1, mRNA [NM_000503]                 |
| A_33_P3367917  | 0,2274422  | up   | 1,2086918  | 0,27344647 | SSH2      | Homo sapiens slingshot protein phosphatase 2 (SSH2), transcript variant 3, mRNA [NM_001282130]                                                                                         |
| A_33_P3385101  | 0,3453531  | up   | 1,2872536  | 0,36429632 | TOLLIP    | Homo sapiens toll interacting protein (TOLLIP), mRNA [NM_019009]                                                                                                                       |
| A_33_P3348719  | 0,06617496 | down | -2,2722015 | -1,1840907 | FGF9      | Homo sapiens fibroblast growth factor 9 (FGF9), mRNA [NM_002010]                                                                                                                       |
| A_23_P34066    | 0,36099702 | up   | 1,126249   | 0,17152576 | IL9R      | Homo sapiens interleukin 9 receptor (IL9R), transcript variant 2, mRNA [NM_176786]                                                                                                     |
| A_23_P31945    | 0,52742183 | down | -1,2387152 | -0,3088445 | IL33      | Homo sapiens interleukin 33 (IL33), transcript variant 1, mRNA [NM_033439]                                                                                                             |

|               |            |      |            |            |           |                                                                                                                                             |
|---------------|------------|------|------------|------------|-----------|---------------------------------------------------------------------------------------------------------------------------------------------|
| A_23_P63681   | 0,4949503  | up   | 1,1018362  | 0,13990977 | IDE       | Homo sapiens insulin-degrading enzyme (IDE), transcript variant 1, mRNA [NM_004969]                                                         |
| A_23_P169437  | 0,2865321  | up   | 1,497986   | 0,5830241  | LCN2      | Homo sapiens lipocalin 2 (LCN2), mRNA [NM_005564]                                                                                           |
| A_33_P3287537 | 0,3482802  | up   | 1,2006979  | 0,2638732  | PMPCA     | peptidase (mitochondrial processing) alpha [Source:HGNC Symbol;Acc:HGNC:18667] [ENST00000371720]                                            |
| A_23_P58588   | 0,6657988  | up   | 1,1573452  | 0,2108192  | SLIT3     | Homo sapiens slit homolog 3 (Drosophila) (SLIT3), transcript variant 2, mRNA [NM_003062]                                                    |
| A_23_P75283   | 0,05186959 | up   | 1,5443143  | 0,62696636 | RBP4      | Homo sapiens retinol binding protein 4, plasma (RBP4), mRNA [NM_006744]                                                                     |
| A_33_P3345036 | 0,18409589 | down | -1,686143  | -0,7537269 | POMC      | Homo sapiens proopiomelanocortin (POMC), transcript variant 1, mRNA [NM_001035256]                                                          |
| A_33_P3420816 | 0,5954564  | down | -1,1745563 | -0,2321158 | GDF1      | Homo sapiens growth differentiation factor 1 (GDF1), mRNA [NM_001492]                                                                       |
| A_23_P35444   | 0,5729875  | up   | 1,3178179  | 0,39815104 | INA       | Homo sapiens internexin neuronal intermediate filament protein, alpha (INA), mRNA [NM_032727]                                               |
| A_23_P393645  | 0,6095445  | up   | 1,0767506  | 0,10668418 | ADAMTS13  | Homo sapiens ADAM metalloproteinase with thrombospondin type 1 motif, 13 (ADAMTS13), transcript variant 1, mRNA [NM_139025]                 |
| A_33_P3254946 | 0,06388597 | up   | 1,4988306  | 0,5838373  | PLEKHH3   | Homo sapiens pleckstrin homology domain containing, family H (with MyTH4 domain) member 3 (PLEKHH3), transcript variant 1, mRNA [NM_024927] |
| A_23_P88099   | 0,670123   | up   | 1,1048598  | 0,14386335 | MCF2L     | Homo sapiens MCF2 cell line derived transforming sequence-like (MCF2L), transcript variant 2, mRNA [NM_024979]                              |
| A_33_P3358228 | 0,76741403 | down | -1,0980643 | -0,1349625 | VWA2      | von Willebrand factor A domain containing 2 [Source:HGNC Symbol;Acc:HGNC:24709] [ENST00000298715]                                           |
| A_23_P3813128 | 0,27299392 | up   | 1,226324   | 0,29434013 | SEMA3F    | Homo sapiens sema domain, immunoglobulin domain (Ig), short basic domain, secreted, (semaphorin) 3F (SEMA3F), mRNA [NM_004186]              |
| A_24_P48495   | 0,3333564  | up   | 2,3229408  | 1,2159524  | LYPD3     | Homo sapiens LY6/PLAUR domain containing 3 (LYPD3), mRNA [NM_014400]                                                                        |
| A_32_P11471   | 0,36461186 | up   | 1,1486688  | 0,19996284 | FAU       | Homo sapiens Finkel-Biskis-Reilly murine sarcoma virus (FBR-MuSV) ubiquitously expressed (FAU), mRNA [NM_001997]                            |
| A_33_P3377151 | 0,09478033 | up   | 1,5694776  | 0,6502844  | CCL19     | Homo sapiens chemokine (C-C motif) ligand 19 (CCL19), mRNA [NM_006274]                                                                      |
| A_23_P126706  | 0,00265243 | down | -1,6590347 | -0,7303441 | ANGPTL1   | Homo sapiens angiopoietin-like 1 (ANGPTL1), mRNA [NM_004673]                                                                                |
| A_23_P114740  | 0,84138006 | up   | 1,0375351  | 0,05316011 | CFH       | Homo sapiens complement factor H (CFH), transcript variant 1, mRNA [NM_000186]                                                              |
| A_33_P3294821 | 0,8033371  | up   | 1,044486   | 0,06279322 | OTOP1     | Homo sapiens otopetrin 1 (OTOP1), mRNA [NM_177998]                                                                                          |
| A_33_P3256920 | 0,5127338  | up   | 1,1784123  | 0,23684442 | WNT7B     | Homo sapiens wingless-type MMTV integration site family, member 7B (WNT7B), mRNA [NM_058238]                                                |
| A_33_P3712341 | 0,24653506 | up   | 1,2767123  | 0,35243344 | CXCL12    | Homo sapiens chemokine (C-X-C motif) ligand 12 (CXCL12), transcript variant 3, mRNA [NM_001033886]                                          |
| A_23_P68511   | 0,85836345 | down | -1,0319899 | -0,0454289 | ANGPT4    | Homo sapiens angiopoietin 4 (ANGPT4), mRNA [NM_015985]                                                                                      |
| A_23_P160881  | 0,3915083  | down | -1,188239  | -0,248825  | SMPDL3B   | Homo sapiens sphingomyelin phosphodiesterase, acid-like 3B (SMPDL3B), transcript variant 2, mRNA [NM_001009568]                             |
| A_33_P3306264 | 0,30848613 | up   | 2,4107022  | 1,2694534  | LYPD3     | Homo sapiens LY6/PLAUR domain containing 3 (LYPD3), mRNA [NM_014400]                                                                        |
| A_23_P128503  | 0,82812536 | up   | 1,058491   | 0,08200899 | IL26      | Homo sapiens interleukin 26 (IL26), mRNA [NM_018402]                                                                                        |
| A_23_P62752   | 0,03748198 | up   | 1,4984361  | 0,5834575  | NPPB      | Homo sapiens natriuretic peptide B (NPPB), mRNA [NM_002521]                                                                                 |
| A_33_P3403153 | 0,14104201 | up   | 1,295578   | 0,37359586 | C1QTNF2   | Homo sapiens C1q and tumor necrosis factor related protein 2 (C1QTNF2), mRNA [NM_031908]                                                    |
| A_23_P62115   | 0,8896978  | up   | 1,0375867  | 0,05323188 | TIMP1     | Homo sapiens TIMP metalloproteinase inhibitor 1 (TIMP1), mRNA [NM_003254]                                                                   |
| A_33_P3334828 | 0,37453774 | up   | 1,1793306  | 0,23796819 | INSL3     | Homo sapiens insulin-like 3 (Leydig cell) (INSL3), transcript variant 1, mRNA [NM_001265587]                                                |
| A_24_P225961  | 0,24994639 | down | -1,1747423 | -0,2323444 | DAG1      | Homo sapiens dystroglycan 1 (dystrophin-associated glycoprotein 1) (DAG1), transcript variant 2, mRNA [NM_004393]                           |
| A_33_P3329149 | 0,45838228 | up   | 1,1515462  | 0,20357235 | CDK13     | Homo sapiens cyclin-dependent kinase 13 (CDK13), transcript variant 2, mRNA [NM_031267]                                                     |
| A_23_P319598  | 0,7585759  | down | -1,1099176 | -0,1504526 | C4BPB     | Homo sapiens complement component 4 binding protein, beta (C4BPB), transcript variant 1, mRNA [NM_000716]                                   |
| A_33_P3329153 | 0,2646967  | up   | 1,2128174  | 0,2783624  | CDK13     | Homo sapiens cyclin-dependent kinase 13 (CDK13), transcript variant 2, mRNA [NM_031267]                                                     |
| A_24_P233488  | 0,78987676 | up   | 1,0746723  | 0,10389686 | LIF       | Homo sapiens leukemia inhibitory factor (LIF), transcript variant 1, mRNA [NM_002309]                                                       |
| A_33_P3241269 | 0,15326652 | down | -3,8331342 | -1,9385245 | CES1      | Homo sapiens carboxylesterase 1 (CES1), transcript variant 1, mRNA [NM_001025195]                                                           |
| A_23_P251562  | 0,37770638 | down | -1,1855508 | -0,2455575 | TUSC2     | Homo sapiens tumor suppressor candidate 2 (TUSC2), mRNA [NM_007275]                                                                         |
| A_23_P137697  | 0,02278282 | down | -2,8710508 | -1,5215789 | SELP      | Homo sapiens selectin P (granule membrane protein 140kDa, antigen CD62) (SELP), mRNA [NM_003005]                                            |
| A_32_P45168   | 0,49527758 | down | -1,2524726 | -0,3247791 | IL6ST     | Homo sapiens interleukin 6 signal transducer (IL6ST), transcript variant 1, mRNA [NM_002184]                                                |
| A_23_P201368  | 0,7184853  | down | -1,0629795 | -0,0881137 | CTBS      | Homo sapiens chitobiase, di-N-acetyl- (CTBS), mRNA [NM_004388]                                                                              |
| A_23_P161125  | 0,8795419  | down | -1,0262887 | -0,0374367 | MOV10     | Homo sapiens Mov10 RISC complex RNA helicase (MOV10), transcript variant 1, mRNA [NM_020963]                                                |
| A_33_P3235400 | 0,7850959  | down | -1,0765322 | -0,1063915 | HDGF      | Homo sapiens hepatoma-derived growth factor (HDGF), transcript variant 1, mRNA [NM_004494]                                                  |
| A_23_P343411  | 0,33334625 | up   | 1,1429163  | 0,19271977 | AGRN      | Homo sapiens agrin (AGRN), mRNA [NM_198576]                                                                                                 |
| A_33_P3318288 | 0,6769505  | up   | 1,086215   | 0,11930972 | CFH       | Homo sapiens complement factor H (CFH), transcript variant 2, mRNA [NM_001014975]                                                           |
| A_23_P85922   | 0,8283161  | down | -1,1240754 | -0,1687388 | BMP8A     | Homo sapiens bone morphogenetic protein 8a (BMP8A), mRNA [NM_181809]                                                                        |
| A_23_P10591   | 0,15794656 | up   | 1,7483836  | 0,80602175 | METRNL    | Homo sapiens meteorin, glial cell differentiation regulator-like (METRNL), mRNA [NM_001004431]                                              |
| A_23_P4592    | 0,6359686  | up   | 1,0977327  | 0,13452674 | SIGLEC6   | Homo sapiens sialic acid binding Ig-like lectin 6 (SIGLEC6), transcript variant 1, mRNA [NM_001245]                                         |
| A_23_P151805  | 0,5805745  | down | -1,2720939 | -0,3472052 | FBLN5     | Homo sapiens fibulin 5 (FBLN5), mRNA [NM_006329]                                                                                            |
| A_24_P374943  | 0,8455259  | up   | 1,0424312  | 0,05995222 | CXADR     | Homo sapiens coxsackie virus and adenovirus receptor (CXADR), transcript variant 1, mRNA [NM_001338]                                        |
| A_32_P107617  | 0,12109523 | up   | 1,3857621  | 0,47067958 | SFTPD     | Homo sapiens surfactant protein D (SFTPD), mRNA [NM_003019]                                                                                 |
| A_33_P3225273 | 0,02591554 | up   | 1,6181318  | 0,6943291  | QSOX1     | Homo sapiens quiescins Q6 sulfhydryl oxidase 1 (QSOX1), transcript variant 2, mRNA [NM_001004128]                                           |
| A_23_P137391  | 0,5679749  | up   | 1,1473656  | 0,19832513 | ENO1      | Homo sapiens enolase 1, (alpha) (ENO1), transcript variant 1, mRNA [NM_001428]                                                              |
| A_23_P50946   | 0,3010118  | down | -2,1324046 | -1,0924811 | RAMP1     | Homo sapiens receptor (G protein-coupled) activity modifying protein 1 (RAMP1), mRNA [NM_005855]                                            |
| A_23_P167818  | 0,00579134 | down | -2,2747097 | -1,1856824 | FAM184A   | Homo sapiens family with sequence similarity 184, member A (FAM184A), transcript variant 1, mRNA [NM_024581]                                |
| A_33_P3229083 | 0,7897299  | down | -1,0677998 | -0,0946412 | HIST1H2BK | Homo sapiens histone cluster 1, H2bk (HIST1H2BK), mRNA [NM_080593]                                                                          |
| A_33_P3369058 | 0,5219757  | up   | 1,1812183  | 0,24027556 | LRRK2     | Homo sapiens leucine-rich repeat kinase 2 (LRRK2), mRNA [NM_198578]                                                                         |

|                |            |      |            |            |           |                                                                                                                                                          |
|----------------|------------|------|------------|------------|-----------|----------------------------------------------------------------------------------------------------------------------------------------------------------|
| A_23_P145978   | 0,1458921  | up   | 1,5081737  | 0,5928026  | VIPR2     | Homo sapiens vasoactive intestinal peptide receptor 2 (VIPR2), mRNA [NM_003382]                                                                          |
| A_33_P3370714  | 0,40390402 | up   | 1,1404431  | 0,18959445 | PGC       | Homo sapiens progastricin (pepsinogen C) (PGC), transcript variant 2, mRNA [NM_001166424]                                                                |
| A_23_P348028   | 0,01078235 | up   | 4,0224257  | 2,0080657  | IL36A     | Homo sapiens interleukin 36, alpha (IL36A), mRNA [NM_014440]                                                                                             |
| A_24_P178175   | 0,16577001 | down | -1,4117737 | -0,4975088 | GGT1      | Homo sapiens gamma-glutamyltransferase 1 (GGT1), transcript variant 6, mRNA [NM_001288833]                                                               |
| A_24_P12401    | 0,6805001  | up   | 1,1282452  | 0,17408068 | VEGFA     | Homo sapiens vascular endothelial growth factor A (VEGFA), transcript variant 1, mRNA [NM_001025366]                                                     |
| A_23_P4161     | 0,06815421 | down | -1,4992052 | -0,5841979 | ARSG      | arylsulfatase G [Source:HGNC Symbol;Acc:HGNC:24102] [ENST00000448504]                                                                                    |
| A_33_P3258274  | 0,52993387 | up   | 1,24083    | 0,3113054  | TFPI      | tissue factor pathway inhibitor (lipoprotein-associated coagulation inhibitor) [Source:HGNC Symbol;Acc:HGNC:11760] [ENST00000481132]                     |
| A_32_P101689   | 0,0993974  | up   | 1,2799153  | 0,35604838 | FAM3C     | Homo sapiens family with sequence similarity 3, member C (FAM3C), transcript variant 1, mRNA [NM_014888]                                                 |
| A_19_P00801279 | 0,24581796 | up   | 1,2637835  | 0,33774927 | MSN       | moesin [Source:HGNC Symbol;Acc:HGNC:7373] [ENST00000429601]                                                                                              |
| A_23_P390518   | 0,40220457 | up   | 1,1550874  | 0,20800196 | TNFRSF11A | Homo sapiens tumor necrosis factor receptor superfamily, member 11a, NFkB activator (TNFRSF11A), transcript variant 1, mRNA [NM_003839]                  |
| A_33_P3219303  | 0,6219149  | down | -1,1327394 | -0,179816  | CEL       | Homo sapiens carboxyl ester lipase (CEL), mRNA [NM_001807]                                                                                               |
| A_23_P41314    | 0,6714734  | up   | 1,0914263  | 0,12621465 | F11       | Homo sapiens coagulation factor XI (F11), mRNA [NM_000128]                                                                                               |
| A_23_P209904   | 0,3720718  | up   | 1,2570806  | 0,3300771  | GPC1      | Homo sapiens glypican 1 (GPC1), mRNA [NM_002081]                                                                                                         |
| A_23_P258367   | 0,51736015 | down | -1,1184916 | -0,1615545 | GLE1      | Homo sapiens GLE1 RNA export mediator (GLE1), transcript variant 2, mRNA [NM_001499]                                                                     |
| A_33_P3389842  | 0,40357858 | down | -2,0033324 | -1,0024018 | PROM1     | Homo sapiens prominin 1 (PROM1), transcript variant 6, mRNA [NM_001145850]                                                                               |
| A_23_P8702     | 0,07596428 | up   | 2,469174   | 1,3040284  | PIP       | Homo sapiens prolactin-induced protein (PIP), mRNA [NM_002652]                                                                                           |
| A_23_P30126    | 0,45160148 | up   | 1,745951   | 0,80401313 | FGFBP1    | Homo sapiens fibroblast growth factor binding protein 1 (FGFBP1), mRNA [NM_005130]                                                                       |
| A_33_P3343196  | 0,79308087 | up   | 1,1325257  | 0,17954376 | CP        | Homo sapiens ceruloplasmin (ferroxidase) (CP), transcript variant 1, mRNA [NM_000096]                                                                    |
| A_24_P940135   | 0,7608518  | down | -1,0623423 | -0,0872487 | CTBS      | Homo sapiens chitobiase, di-N-acetyl- (CTBS), mRNA [NM_004388]                                                                                           |
| A_23_P93180    | 0,6694449  | down | -1,1065236 | -0,1460343 | HIST1H2BC | Homo sapiens histone cluster 1, H2bc (HIST1H2BC), mRNA [NM_003526]                                                                                       |
| A_33_P3349536  | 0,75573003 | down | -1,130644  | -0,1771447 | CHEK1     | Homo sapiens checkpoint kinase 1 (CHEK1), transcript variant 2, mRNA [NM_001114212]                                                                      |
| A_33_P3354935  | 0,01512028 | up   | 1,4845966  | 0,570071   | CSF1      | Homo sapiens colony stimulating factor 1 (macrophage) (CSF1), transcript variant 4, mRNA [NM_172212]                                                     |
| A_23_P123853   | 0,5761214  | up   | 1,2710243  | 0,34599167 | CCL19     | Homo sapiens chemokine (C-C motif) ligand 19 (CCL19), mRNA [NM_006274]                                                                                   |
| A_24_P142118   | 0,39768353 | up   | 1,2352381  | 0,30478913 | THBS1     | Homo sapiens thrombospondin 1 (THBS1), mRNA [NM_003246]                                                                                                  |
| A_23_P88963    | 0,23834299 | up   | 1,2943769  | 0,3722577  | ALDOA     | Homo sapiens aldolase A, fructose-bisphosphate (ALDOA), transcript variant 1, mRNA [NM_000034]                                                           |
| A_23_P381203   | 0,2466902  | down | -1,3096784 | -0,3892126 | KIAA0556  | Homo sapiens KIAA0556 (KIAA0556), mRNA [NM_015202]                                                                                                       |
| A_23_P139648   | 0,08893253 | up   | 1,3965098  | 0,48182565 | IAPP      | Homo sapiens islet amyloid polypeptide (IAPP), mRNA [NM_000415]                                                                                          |
| A_33_P3777207  | 0,2873938  | down | -1,184128  | -0,2438251 | MMEL1     | Homo sapiens membrane metallo-endopeptidase-like 1 (MMEL1), mRNA [NM_033467]                                                                             |
| A_33_P3249872  | 0,7533368  | up   | 1,0853441  | 0,11815248 | FBLN1     | Homo sapiens fibulin 1 (FBLN1), transcript variant C, mRNA [NM_001996]                                                                                   |
| A_23_P134419   | 0,18109207 | up   | 1,341608   | 0,42396325 | ZP3       | Homo sapiens zona pellucida glycoprotein 3 (sperm receptor) (ZP3), transcript variant 2, mRNA [NM_007155]                                                |
| A_23_P28186    | 0,04939144 | down | -6,4130187 | -2,6810036 | SRD5A2    | Homo sapiens steroid-5-alpha-reductase, alpha polypeptide 2 (3-oxo-5 alpha-steroid delta 4-dehydrogenase alpha 2) (SRD5A2), mRNA [NM_000348]             |
| A_33_P3258091  | 0,2159058  | down | -1,2302785 | -0,2989849 | RNPEP     | Homo sapiens arginyl aminopeptidase (aminopeptidase B) (RNPEP), mRNA [NM_020216]                                                                         |
| A_23_P212126   | 0,44878864 | down | -1,2467746 | -0,3182006 | COLQ      | Homo sapiens collagen-like tail subunit (single strand of homotrimer) of asymmetric acetylcholinesterase (COLQ), transcript variant II, mRNA [NM_080538] |
| A_24_P310256   | 0,4334904  | down | -1,2413095 | -0,3118629 | LG4       | Homo sapiens leucine-rich repeat LGI family, member 4 (LG4), mRNA [NM_139284]                                                                            |
| A_23_P501007   | 0,06154975 | down | -1,8156925 | -0,86052   | EFEMP1    | Homo sapiens EGF containing fibulin-like extracellular matrix protein 1 (EFEMP1), transcript variant 2, mRNA [NM_001039348]                              |
| A_24_P224116   | 0,7923767  | down | -1,069996  | -0,0976054 | PLA2G1B   | Homo sapiens phospholipase A2, group IB (pancreas) (PLA2G1B), mRNA [NM_000928]                                                                           |
| A_23_P71270    | 0,7171336  | down | -1,1887666 | -0,2494655 | AZGP1     | Homo sapiens alpha-2-glycoprotein 1, zinc-binding (AZGP1), mRNA [NM_001185]                                                                              |
| A_33_P3289121  | 0,00446057 | down | -14,534434 | -3,861403  | C2orf40   | Homo sapiens chromosome 2 open reading frame 40 (C2orf40), mRNA [NM_032411]                                                                              |
| A_23_P200741   | 0,16513768 | up   | 1,1974376  | 0,25995052 | DPT       | Homo sapiens dermatopontin (DPT), mRNA [NM_001937]                                                                                                       |
| A_23_P347169   | 0,6240895  | up   | 1,0907024  | 0,12525754 | MTUS1     | Homo sapiens microtubule associated tumor suppressor 1 (MTUS1), transcript variant 1, mRNA [NM_001001924]                                                |
| A_33_P3232523  | 0,10584146 | up   | 1,431817   | 0,5178472  | APOL4     | apolipoprotein L, 4 [Source:HGNC Symbol;Acc:HGNC:14867] [ENST00000328429]                                                                                |
| A_23_P258164   | 0,8018543  | down | -1,0405959 | -0,0574099 | CORT      | Homo sapiens cortistatin (CORT), mRNA [NM_001302]                                                                                                        |
| A_23_P151895   | 0,5945771  | up   | 1,2101682  | 0,27520764 | CILP      | Homo sapiens cartilage intermediate layer protein, nucleotide pyrophosphohydrolase (CILP), mRNA [NM_003613]                                              |
| A_23_P40880    | 0,85911644 | up   | 1,0350605  | 0,04971513 | CMTM8     | Homo sapiens CKLF-like MARVEL transmembrane domain containing 8 (CMTM8), mRNA [NM_178868]                                                                |
| A_23_P117363   | 0,03295006 | down | -1,5169085 | -0,6011341 | SERPINA6  | Homo sapiens serpin peptidase inhibitor, clade A (alpha-1 antiproteinase, antitrypsin), member 6 (SERPINA6), mRNA [NM_001756]                            |
| A_24_P920125   | 0,21283756 | down | -1,2728367 | -0,3480473 | PPIA      | Homo sapiens peptidylprolyl isomerase A (cyclophilin A) (PPIA), transcript variant 1, mRNA [NM_021130]                                                   |
| A_24_P91566    | 0,08801466 | up   | 1,8728106  | 0,905205   | BMP7      | Homo sapiens bone morphogenetic protein 7 (BMP7), mRNA [NM_001719]                                                                                       |
| A_23_P70398    | 0,10391223 | up   | 1,7564192  | 0,8126372  | VEGFA     | Homo sapiens vascular endothelial growth factor A (VEGFA), transcript variant 6, mRNA [NM_001025370]                                                     |
| A_23_P77000    | 0,06966905 | up   | 1,6337533  | 0,70819014 | VASH1     | Homo sapiens vasohibin 1 (VASH1), mRNA [NM_014909]                                                                                                       |
| A_33_P3404706  | 0,4042094  | up   | 1,2125465  | 0,27804002 | SPN       | Homo sapiens sialophorin (SPN), transcript variant 1, mRNA [NM_001030288]                                                                                |
| A_23_P372874   | 0,67027205 | up   | 1,1173208  | 0,16004343 | S100A13   | Homo sapiens S100 calcium binding protein A13 (S100A13), transcript variant 1, mRNA [NM_001024210]                                                       |
| A_23_P126836   | 0,83426064 | up   | 1,079036   | 0,10974299 | TNFSF4    | Homo sapiens tumor necrosis factor (ligand) superfamily, member 4 (TNFSF4), transcript variant 1, mRNA [NM_003326]                                       |
| A_33_P3401301  | 0,4027336  | up   | 1,1685921  | 0,22477144 | RPL39     | Homo sapiens ribosomal protein L39 (RPL39), mRNA [NM_001000]                                                                                             |
| A_23_P130158   | 0,5906038  | down | -1,1650492 | -0,2203909 | WNT3      | Homo sapiens wingless-type MMTV integration site family, member 3 (WNT3), mRNA [NM_030753]                                                               |
| A_23_P169503   | 0,11835163 | down | -1,5030733 | -0,5879154 | CEL       | Homo sapiens carboxyl ester lipase (CEL), mRNA [NM_001807]                                                                                               |

|               |            |      |            |            |           |                                                                                                                                                               |
|---------------|------------|------|------------|------------|-----------|---------------------------------------------------------------------------------------------------------------------------------------------------------------|
| A_24_P141707  | 0,12803572 | up   | 1,2605679  | 0,33407384 | INHBE     | Homo sapiens inhibin, beta E (INHBE), mRNA [NM_031479]                                                                                                        |
| A_23_P251795  | 0,59613025 | up   | 1,1137029  | 0,15536441 | GPC2      | glypican 2 [Source:HGNC Symbol;Acc:HGNC:4450] [ENST00000471050]                                                                                               |
| A_23_P257003  | 0,55515826 | down | -1,1446488 | -0,194905  | PCSK5     | Homo sapiens proprotein convertase subtilisin/kexin type 5 (PCSK5), transcript variant 2, mRNA [NM_006200]                                                    |
| A_23_P94338   | 0,07157236 | down | -2,1283453 | -1,0897322 | ENPP2     | Homo sapiens ectonucleotide pyrophosphatase/phosphodiesterase 2 (ENPP2), transcript variant 1, mRNA [NM_006209]                                               |
| A_33_P3308105 | 0,8130788  | down | -1,0657431 | -0,0918597 | GGH       | Homo sapiens gamma-glutamyl hydrolase (conjugase, folylpolyglutamyldihydrolase) (GGH), mRNA [NM_003878]                                                       |
| A_33_P3380625 | 0,7221832  | up   | 1,1192695  | 0,16255744 | HSPG2     | Homo sapiens heparan sulfate proteoglycan 2 (HSPG2), transcript variant 1, mRNA [NM_001291860]                                                                |
| A_23_P142345  | 0,24605535 | up   | 1,2227327  | 0,290109   | PRTN3     | Homo sapiens proteinase 3 (PRTN3), mRNA [NM_002777]                                                                                                           |
| A_33_P3329522 | 0,22880343 | down | -2,145553  | -1,1013496 | LRRC17    | Homo sapiens leucine rich repeat containing 17 (LRRC17), transcript variant 1, mRNA [NM_001031692]                                                            |
| A_23_P254179  | 0,8223881  | down | -1,0380297 | -0,0538477 | ADNP      | Homo sapiens activity-dependent neuroprotector homeobox (ADNP), transcript variant 1, mRNA [NM_015339]                                                        |
| A_23_P137665  | 0,4617525  | up   | 1,951563   | 0,96463    | CHI3L1    | Homo sapiens chitinase 3-like 1 (cartilage glycoprotein-39) (CHI3L1), mRNA [NM_001276]                                                                        |
| A_33_P3416797 | 0,0889748  | down | -1,6719537 | -0,7415349 | OVS2      | Homo sapiens mRNA; cDNA DKFZp434C0631 (from clone DKFZp434C0631). [AL831947]                                                                                  |
| A_23_P8339    | 0,5530287  | down | -1,0883772 | -0,1221787 | MRPL18    | Homo sapiens mitochondrial ribosomal protein L18 (MRPL18), mRNA [NM_014161]                                                                                   |
| A_23_P374782  | 0,04932215 | up   | 1,3415033  | 0,42385057 | SH3KBP1   | Homo sapiens SH3-domain kinase binding protein 1 (SH3KBP1), transcript variant 2, mRNA [NM_001024666]                                                         |
| A_23_P301942  | 0,41970804 | down | -1,6295407 | -0,7044654 | NPPC      | Homo sapiens natriuretic peptide C (NPPC), mRNA [NM_024409]                                                                                                   |
| A_23_P151907  | 0,8553153  | up   | 1,0386598  | 0,05472321 | PCSK6     | Homo sapiens proprotein convertase subtilisin/kexin type 6 (PCSK6), transcript variant 1, mRNA [NM_002570]                                                    |
| A_23_P13094   | 0,06081602 | down | -5,4486094 | -2,445888  | MMP10     | Homo sapiens matrix metalloproteinase 10 (stromelysin 2) (MMP10), mRNA [NM_002425]                                                                            |
| A_23_P218505  | 0,43827215 | up   | 1,1427249  | 0,19247809 | LHB       | Homo sapiens luteinizing hormone beta polypeptide (LHB), mRNA [NM_000894]                                                                                     |
| A_23_P94030   | 0,00257079 | down | -2,7461228 | -1,4573961 | LAMB1     | Homo sapiens laminin, beta 1 (LAMB1), mRNA [NM_002291]                                                                                                        |
| A_23_P32454   | 0,7448028  | up   | 1,1340425  | 0,1814747  | TG        | Homo sapiens thyroglobulin (TG), mRNA [NM_003235]                                                                                                             |
| A_23_P409623  | 0,26326415 | up   | 1,2043381  | 0,26824042 | PPFIBP2   | Homo sapiens PTPRF interacting protein, binding protein 2 (liprin beta 2) (PPFIBP2), transcript variant 1, mRNA [NM_003621]                                   |
| A_33_P3273534 | 0,45278168 | down | -1,1279244 | -0,1736704 | KRT81     | Homo sapiens keratin 81, type II (KRT81), mRNA [NM_002281]                                                                                                    |
| A_23_P50919   | 0,6705037  | up   | 1,2898628  | 0,36721757 | SERPINE2  | Homo sapiens serpin peptidase inhibitor, clade E (nexin, plasminogen activator inhibitor type 1), member 2 (SERPINE2), transcript variant 1, mRNA [NM_006216] |
| A_33_P3321070 | 0,81695294 | down | -1,0591975 | -0,0829717 | WNT4      | wingless-type MMTV integration site family, member 4 [Source:HGNC Symbol;Acc:HGNC:12783] [ENST00000415567]                                                    |
| A_24_P215804  | 0,02400749 | down | -1,8088361 | -0,8550617 | CKLF      | Homo sapiens chemokine-like factor (CKLF), transcript variant 1, mRNA [NM_016951]                                                                             |
| A_32_P86150   | 0,1998165  | up   | 2,2523708  | 1,1714444  | CTRB2     | Homo sapiens chymotrypsinogen B2 (CTRB2), mRNA [NM_001025200]                                                                                                 |
| A_33_P3231953 | 0,72198004 | down | -1,1539358 | -0,206563  | COL12A1   | Homo sapiens collagen, type XII, alpha 1 (COL12A1), transcript variant long, mRNA [NM_004370]                                                                 |
| A_23_P501722  | 0,38203958 | up   | 1,2619864  | 0,33569634 | TSPAN32   | Homo sapiens tetraspanin 32 (TSPAN32), mRNA [NM_139022]                                                                                                       |
| A_24_P48204   | 0,17173181 | up   | 1,5870416  | 0,66633993 | SECTM1    | Homo sapiens secreted and transmembrane 1 (SECTM1), mRNA [NM_003004]                                                                                          |
| A_33_P3316621 | 0,02881983 | up   | 1,8554925  | 0,89180213 | BMP3      | Homo sapiens bone morphogenetic protein 3 (BMP3), mRNA [NM_001201]                                                                                            |
| A_24_P376707  | 0,64295334 | down | -1,0911689 | -0,1258744 | HDGF      | Homo sapiens hepatoma-derived growth factor (HDGF), transcript variant 1, mRNA [NM_004494]                                                                    |
| A_33_P3339036 | 0,38835976 | up   | 1,1762421  | 0,23418504 | MECP2     | Homo sapiens methyl CpG binding protein 2 (MECP2), transcript variant 2, mRNA [NM_001110792]                                                                  |
| A_33_P3245439 | 0,85022277 | up   | 1,0680448  | 0,09497213 | CD40      | Homo sapiens CD40 molecule, TNF receptor superfamily member 5 (CD40), transcript variant 1, mRNA [NM_001250]                                                  |
| A_23_P105957  | 0,30492133 | down | -1,2792497 | -0,3552979 | ACTN1     | Homo sapiens actinin, alpha 1 (ACTN1), transcript variant 2, mRNA [NM_0011102]                                                                                |
| A_23_P331748  | 0,02073113 | up   | 1,6420798  | 0,71552426 | CD33      | Homo sapiens CD33 molecule (CD33), transcript variant 1, mRNA [NM_001772]                                                                                     |
| A_23_P126278  | 0,29043606 | up   | 1,2826343  | 0,35910985 | CHIT1     | Homo sapiens chitinase 1 (chitotriosidase) (CHIT1), transcript variant 1, mRNA [NM_003465]                                                                    |
| A_32_P220307  | 0,82436186 | up   | 1,0437423  | 0,06176555 | RPL39     | Homo sapiens ribosomal protein L39 (RPL39), mRNA [NM_001000]                                                                                                  |
| A_33_P3390758 | 0,13286002 | down | -1,4013329 | -0,4867997 | HSPA8     | Homo sapiens heat shock 70kDa protein 8 (HSPA8), transcript variant 2, mRNA [NM_153201]                                                                       |
| A_33_P3395743 | 0,06270421 | up   | 1,4942551  | 0,5794264  | VWA1      | Homo sapiens von Willebrand factor A domain containing 1 (VWA1), transcript variant 1, mRNA [NM_022834]                                                       |
| A_23_P38427   | 0,25858882 | up   | 1,2941059  | 0,37195566 | RAB11FIP4 | RAB11 family interacting protein 4 (class II) [Source:HGNC Symbol;Acc:HGNC:30267] [ENST00000621161]                                                           |
| A_23_P160751  | 0,17797971 | down | -1,5748284 | -0,6551946 | FCRL2     | Homo sapiens Fc receptor-like 2 (FCRL2), transcript variant 1, mRNA [NM_030764]                                                                               |
| A_33_P3420900 | 0,07413913 | down | -1,4631288 | -0,5490568 | PATE2     | Homo sapiens prostate and testis expressed 2 (PATE2), mRNA [NM_212555]                                                                                        |
| A_33_P3219811 | 0,30102584 | up   | 1,2174737  | 0,28389066 | PTGDS     | prostaglandin D2 synthase 21kDa (brain) [Source:HGNC Symbol;Acc:HGNC:9592] [ENST00000371623]                                                                  |
| A_33_P3298539 | 0,677058   | down | -1,1035239 | -0,1421178 | APOA1     | Homo sapiens apolipoprotein A-I (APOA1), mRNA [NM_000039]                                                                                                     |
| A_23_P360797  | 0,01049556 | down | -2,345924  | -1,2301562 | NTF3      | Homo sapiens neurotrophin 3 (NTF3), transcript variant 2, mRNA [NM_002527]                                                                                    |
| A_24_P410017  | 0,5811428  | down | -1,1351291 | -0,1828564 | POTEI     | Homo sapiens POTE ankyrin domain family, member I (POTEI), mRNA [NM_001277406]                                                                                |
| A_23_P25069   | 0,03732549 | down | -2,2249146 | -1,15375   | OVS2      |                                                                                                                                                               |
| A_33_P3395952 | 0,2504861  | up   | 1,222438   | 0,28976128 | COL20A1   | Homo sapiens collagen, type XX, alpha 1 (COL20A1), mRNA [NM_020882]                                                                                           |
| A_33_P3417487 | 0,30207336 | up   | 1,5794387  | 0,6594119  | SCUBE1    | signal peptide, CUB domain, EGF-like 1 [Source:HGNC Symbol;Acc:HGNC:13441] [ENST00000290460]                                                                  |
| A_24_P222655  | 0,1195258  | up   | 1,5423589  | 0,62513846 | C1QA      | Homo sapiens complement component 1, q subcomponent, A chain (C1QA), mRNA [NM_015991]                                                                         |
| A_33_P3277178 | 0,88745403 | up   | 1,028123   | 0,0400129  | SSPO      | SCO-spondin [Source:HGNC Symbol;Acc:HGNC:21998] [ENST00000472850]                                                                                             |
| A_23_P22444   | 0,60848933 | down | -1,1694721 | -0,2258574 | CFP       | Homo sapiens complement factor properdin (CFP), transcript variant 1, mRNA [NM_002621]                                                                        |
| A_24_P13285   | 0,20758834 | up   | 1,2795748  | 0,35566443 | PPP1R1A   | Homo sapiens protein phosphatase 1, regulatory (inhibitor) subunit 1A (PPP1R1A), mRNA [NM_006741]                                                             |
| A_33_P3302255 | 0,28009817 | up   | 1,2091353  | 0,27397567 | ITM2B     | Homo sapiens integral membrane protein 2B (ITM2B), mRNA [NM_021999]                                                                                           |
| A_33_P3395947 | 0,79866034 | up   | 1,1135608  | 0,15518032 | IL4R      | Homo sapiens interleukin 4 receptor (IL4R), transcript variant 4, mRNA [NM_001257407]                                                                         |
| A_24_P133253  | 0,07178813 | down | -1,6279889 | -0,7030909 | KITLG     | Homo sapiens KIT ligand (KITLG), transcript variant b, mRNA [NM_000899]                                                                                       |

|                |            |      |            |            |          |                                                                                                                                                                |
|----------------|------------|------|------------|------------|----------|----------------------------------------------------------------------------------------------------------------------------------------------------------------|
| A_33_P3250383  | 0,05453686 | up   | 1,250674   | 0,3227058  | CNP      | Homo sapiens 2',3'-cyclic nucleotide 3' phosphodiesterase (CNP), mRNA [NM_033133]                                                                              |
| A_23_P2283     | 0,07695877 | down | -1,7993964 | -0,847513  | TAC3     | Homo sapiens tachykinin 3 (TAC3), transcript variant 1, mRNA [NM_013251]                                                                                       |
| A_24_P164731   | 0,5028796  | down | -1,120706  | -0,1644078 | TMED1    | Homo sapiens transmembrane emp24 protein transport domain containing 1 (TMED1), transcript variant 1, mRNA [NM_006858]                                         |
| A_19_P00806659 | 0,27439347 | up   | 1,281636   | 0,35798657 | ITM2B    | integral membrane protein 2B [Source:HGNC Symbol;Acc:HGNC:6174] [ENST00000378565]                                                                              |
| A_23_P17053    | 0,17969406 | up   | 4,632178   | 2,2116907  | IL36G    | Homo sapiens interleukin 36, gamma (IL36G), transcript variant 1, mRNA [NM_019618]                                                                             |
| A_23_P60248    | 0,5708135  | up   | 1,0909346  | 0,12556466 | TXN      | Homo sapiens thioredoxin (TXN), transcript variant 1, mRNA [NM_003329]                                                                                         |
| A_23_P95213    | 0,4877733  | up   | 1,1480356  | 0,19916743 | SFTPC    | Homo sapiens surfactant protein C (SFTPC), transcript variant 1, mRNA [NM_003018]                                                                              |
| A_33_P3256347  | 0,76318324 | down | -1,044808  | -0,0632379 | TIMM8B   | Homo sapiens translocase of inner mitochondrial membrane 8 homolog B (yeast) (TIMM8B), transcript variant 1, mRNA [NM_012459]                                  |
| A_33_P3305571  | 0,14696789 | up   | 2,0127962  | 1,009201   | TNFRSF6B | Homo sapiens tumor necrosis factor receptor superfamily, member 6b, decoy (TNFRSF6B), mRNA [NM_003823]                                                         |
| A_23_P138760   | 0,8801044  | up   | 1,0478337  | 0,06740974 | CLCF1    | Homo sapiens cardiotrophin-like cytokine factor 1 (CLCF1), transcript variant 1, mRNA [NM_013246]                                                              |
| A_23_P5654     | 0,5390699  | down | -1,1474082 | -0,1983788 | IL37     | Homo sapiens interleukin 37 (IL37), transcript variant 1, mRNA [NM_014439]                                                                                     |
| A_33_P3360363  | 0,2662149  | down | -1,2793485 | -0,3554093 | GATA4    | Homo sapiens GATA binding protein 4 (GATA4), mRNA [NM_002052]                                                                                                  |
| A_23_P140876   | 0,51780075 | up   | 0,51780075 | 0,2554159  | ABCA3    | Homo sapiens ATP-binding cassette, sub-family A (ABC1), member 3 (ABCA3), mRNA [NM_001089]                                                                     |
| A_23_P45099    | 0,2284903  | down | -1,7294619 | -0,7903233 | HLA-DRB5 | Homo sapiens major histocompatibility complex, class II, DR beta 5 (HLA-DRB5), mRNA [NM_002125]                                                                |
| A_33_P3310104  | 0,553281   | up   | 1,43092    | 0,51694304 | SERPINB5 | Homo sapiens serpin peptidase inhibitor, clade B (ovalbumin), member 5 (SERPINB5), mRNA [NM_002639]                                                            |
| A_24_P146683   | 0,03808302 | down | -3,1188772 | -1,6410267 | MSMB     | Homo sapiens microseminoprotein, beta- (MSMB), transcript variant PSP94, mRNA [NM_002443]                                                                      |
| A_33_P3228322  | 0,22573335 | up   | 1,3500763  | 0,43304095 | IL18BP   | Homo sapiens interleukin 18 binding protein (IL18BP), transcript variant A, mRNA [NM_173042]                                                                   |
| A_24_P179351   | 0,26968503 | up   | 1,1639066  | 0,21897526 | TPT1     | Homo sapiens tumor protein, translationally-controlled 1 (TPT1), transcript variant 2, mRNA [NM_003295]                                                        |
| A_23_P9485     | 0,19331434 | up   | 1,2422937  | 0,3130063  | ORM2     | Homo sapiens orosomucoid 2 (ORM2), mRNA [NM_000608]                                                                                                            |
| A_24_P355944   | 0,16512334 | up   | 1,6418251  | 0,71530044 | EFNB2    | Homo sapiens ephrin-B2 (EFNB2), mRNA [NM_004093]                                                                                                               |
| A_33_P3399101  | 0,26597327 | up   | 1,227568   | 0,29580298 | CTSL     | cathepsin L [Source:HGNC Symbol;Acc:HGNC:2537] [ENST00000342020]                                                                                               |
| A_33_P3295358  | 0,10314799 | up   | 3,8696668  | 1,9522094  | ANGPTL4  | Homo sapiens angiopoietin-like 4 (ANGPTL4), transcript variant 1, mRNA [NM_139314]                                                                             |
| A_24_P79403    | 0,8700704  | up   | 1,0461112  | 0,06503625 | PF4      | Homo sapiens platelet factor 4 (PF4), mRNA [NM_002619]                                                                                                         |
| A_33_P3349883  | 0,47848013 | up   | 1,1819345  | 0,24115005 | LGALS8   | lectin, galactoside-binding, soluble, 8 [Source:HGNC Symbol;Acc:HGNC:6569] [ENST00000366583]                                                                   |
| A_23_P376488   | 0,4001044  | up   | 1,5480382  | 0,54440285 | TNF      | Homo sapiens tumor necrosis factor (TNF), mRNA [NM_000594]                                                                                                     |
| A_24_P257416   | 0,7657004  | down | -1,2361612 | -0,3058669 | CXCL2    | Homo sapiens chemokine (C-X-C motif) ligand 2 (CXCL2), mRNA [NM_002089]                                                                                        |
| A_33_P3215277  | 0,8822146  | down | -1,0470353 | -0,0663101 | TTBK2    | Homo sapiens tau tubulin kinase 2 (TTBK2), mRNA [NM_173500]                                                                                                    |
| A_32_P210642   | 0,7509557  | up   | 1,1046287  | 0,1435615  | EGFL7    | Homo sapiens EGF-like-domain, multiple 7 (EGFL7), transcript variant 2, mRNA [NM_201446]                                                                       |
| A_33_P3446495  | 0,3179874  | up   | 1,2140023  | 0,2797711  | FRMD4B   | Homo sapiens FERM domain containing 4B (FRMD4B), mRNA [NM_015123]                                                                                              |
| A_23_P327361   | 0,46077046 | down | -1,25742   | -0,3304665 | DMXL2    | Homo sapiens Dmx-like 2 (DMXL2), transcript variant 2, mRNA [NM_015263]                                                                                        |
| A_23_P45185    | 0,6647027  | down | -1,0993534 | -0,1366553 | FIGF     | Homo sapiens c-fos induced growth factor (vascular endothelial growth factor D) (FIGF), mRNA [NM_004469]                                                       |
| A_19_P00317164 | 0,82317036 | down | -1,0588036 | -0,0824349 | RDX      | Homo sapiens radixin (RDX), transcript variant 1, mRNA [NM_001260492]                                                                                          |
| A_24_P391368   | 0,3564526  | down | -1,1487865 | -0,2001108 | ATXN10   | Homo sapiens ataxin 10 (ATXN10), transcript variant 1, mRNA [NM_013236]                                                                                        |
| A_23_P154784   | 0,36247012 | down | -2,1018577 | -1,0716649 | BPIFB1   | Homo sapiens BPI fold containing family B, member 1 (BPIFB1), mRNA [NM_033197]                                                                                 |
| A_23_P204144   | 0,04669525 | up   | 1,596086   | 0,6745384  | KRT85    | Homo sapiens keratin 85, type II (KRT85), transcript variant 1, mRNA [NM_002283]                                                                               |
| A_33_P3759611  | 0,17097618 | up   | 1,2508175  | 0,32287136 | PDE4C    | Homo sapiens phosphodiesterase 4C, cAMP-specific (PDE4C), transcript variant 1, mRNA [NM_000923]                                                               |
| A_23_P349416   | 0,55104685 | up   | 1,1039332  | 0,1426529  | ERBB3    | Homo sapiens v-erb-b2 avian erythroblastic leukemia viral oncogene homolog 3 (ERBB3), transcript variant 1, mRNA [NM_001982]                                   |
| A_33_P3351955  | 0,3344703  | up   | 1,1990498  | 0,2618916  | EGFR     | Homo sapiens epidermal growth factor receptor (EGFR), transcript variant 2, mRNA [NM_201282]                                                                   |
| A_24_P336551   | 0,5078569  | up   | 1,1252565  | 0,17025395 | BGLAP    | Homo sapiens bone gamma-carboxylglutamate (gla) protein (BGLAP), mRNA [NM_199173]                                                                              |
| A_33_P3362367  | 0,5941683  | up   | 1,1221768  | 0,16629994 | RTN3     | reticulon 3 [Source:HGNC Symbol;Acc:HGNC:10469] [ENST00000338850]                                                                                              |
| A_23_P363778   | 0,11206271 | up   | 1,823424   | 0,86665004 | FRZB     | Homo sapiens frizzled-related protein (FRZB), mRNA [NM_001463]                                                                                                 |
| A_23_P210482   | 0,13323732 | up   | 1,6585921  | 0,72995913 | ADA      | Homo sapiens adenosine deaminase (ADA), mRNA [NM_000022]                                                                                                       |
| A_23_P356139   | 0,24692777 | up   | 1,1811075  | 0,2401403  | FAM178A  | Homo sapiens family with sequence similarity 178, member A (FAM178A), transcript variant 1, mRNA [NM_018121]                                                   |
| A_33_P3278410  | 0,01973846 | up   | 1,6688955  | 0,73889357 | MLLT4    | Homo sapiens myeloid/lymphoid or mixed-lineage leukemia (trithorax homolog, Drosophila); translocated to, 4 (MLLT4), transcript variant 1, mRNA [NM_001207008] |
| A_33_P3236177  | 0,65641    | down | -1,2297162 | -0,2983254 | ANG      | Homo sapiens angiogenin, ribonuclease, RNase A family, 5 (ANG), transcript variant 1, mRNA [NM_001145]                                                         |
| A_23_P6771     | 0,24172048 | down | -1,3757448 | -0,4602129 | LMCD1    | Homo sapiens LIM and cysteine-rich domains 1 (LMCD1), transcript variant 1, mRNA [NM_014583]                                                                   |
| A_23_P119562   | 0,00915929 | up   | 2,1721547  | 1,1191268  | CFD      | Homo sapiens complement factor D (adipsin) (CFD), mRNA [NM_001928]                                                                                             |
| A_23_P155755   | 0,64459795 | up   | 1,466236   | 0,55211735 | CXCL6    | Homo sapiens chemokine (C-X-C motif) ligand 6 (CXCL6), mRNA [NM_002993]                                                                                        |
| A_33_P3413989  | 0,25225434 | up   | 1,7029847  | 0,76806545 | SERPING1 | Homo sapiens serpin peptidase inhibitor, clade G (C1 inhibitor), member 1 (SERPING1), transcript variant 1, mRNA [NM_000062]                                   |
| A_33_P3284508  | 0,05504459 | up   | 1,6352898  | 0,7095463  | CD14     | Homo sapiens CD14 molecule (CD14), transcript variant 3, mRNA [NM_001174104]                                                                                   |
| A_24_P211565   | 0,24405786 | up   | 1,3514144  | 0,43447018 | C1QTNF6  | Homo sapiens C1q and tumor necrosis factor related protein 6 (C1QTNF6), transcript variant 1, mRNA [NM_031910]                                                 |
| A_23_P257834   | 0,41147798 | down | -1,246076  | -0,3173921 | ALB      | Homo sapiens albumin (ALB), mRNA [NM_000477]                                                                                                                   |
| A_23_P129695   | 0,0971243  | up   | 1,8978043  | 0,9243312  | VASN     | Homo sapiens vasorin (VASN), mRNA [NM_138440]                                                                                                                  |
| A_33_P3344332  | 0,75814736 | down | -1,0631286 | -0,0883161 | RPL39    | Homo sapiens ribosomal protein L39 (RPL39), mRNA [NM_001000]                                                                                                   |
| A_23_P146456   | 0,11079074 | up   | 2,6434076  | 1,4023988  | CTSV     | Homo sapiens cathepsin V (CTSV), transcript variant 1, mRNA [NM_001333]                                                                                        |



|                |            |      |             |            |          |                                                                                                                                |
|----------------|------------|------|-------------|------------|----------|--------------------------------------------------------------------------------------------------------------------------------|
| A_32_P107029   | 0,30825534 | up   | 1,2055022   | 0,26963422 | NAPSA    | Homo sapiens napsin A aspartic peptidase (NAPSA), mRNA [NM_004851]                                                             |
| A_23_P256473   | 0,34803662 | down | -1,4980923  | -0,5831265 | SEMA3C   | Homo sapiens sema domain, immunoglobulin domain (Ig), short basic domain, secreted, (semaphorin) 3C (SEMA3C), mRNA [NM_006379] |
| A_23_P145863   | 0,6150629  | up   | 1,0975682   | 0,13431053 | S100A11  | Homo sapiens S100 calcium binding protein A11 (S100A11), mRNA [NM_005620]                                                      |
| A_24_P365807   | 0,6087325  | up   | 1,20131     | 0,26460853 | EFNB1    | Homo sapiens ephrin-B1 (EFNB1), mRNA [NM_004429]                                                                               |
| A_23_P61057    | 0,8390848  | down | -1,0529352  | -0,0744167 | IL16     | Homo sapiens interleukin 16 (IL16), transcript variant 1, mRNA [NM_004513]                                                     |
| A_33_P3243907  | 0,39003924 | up   | 1,1456921   | 0,19621938 | CTSD     | Homo sapiens cathepsin D (CTSD), mRNA [NM_001909]                                                                              |
| A_23_P42282    | 0,8189911  | down | -1,0777144  | -0,107975  | C4B      | Homo sapiens complement component 4B (Chido blood group) (C4B), mRNA [NM_001002029]                                            |
| A_23_P145657   | 0,09979409 | down | -1,4685206  | -0,5543636 | STAG3    | Homo sapiens stromal antigen 3 (STAG3), transcript variant 1, mRNA [NM_012447]                                                 |
| A_24_P239176   | 0,08429401 | up   | 1,689817    | 0,756867   | MUC4     | Homo sapiens mucin 4, cell surface associated (MUC4), transcript variant 1, mRNA [NM_018406]                                   |
| A_23_P28857    | 0,7999505  | up   | 1,071452    | 0,09956725 | SIRPG    | Homo sapiens signal-regulatory protein gamma (SIRPG), transcript variant 1, mRNA [NM_018556]                                   |
| A_23_P209954   | 0,40411845 | up   | 1,68817     | 0,75546014 | GPLY     | Homo sapiens granulysin (GNLY), transcript variant 2, mRNA [NM_006433]                                                         |
| A_33_P3228266  | 0,2667955  | up   | 1,1596209   | 0,2136532  | CST3     | Homo sapiens cystatin C (CST3), transcript variant 1, mRNA [NM_000099]                                                         |
| A_23_P164946   | 0,14063843 | down | -1,12393614 | -0,309597  | FKRP     | Homo sapiens fukutin related protein (FKRP), transcript variant 2, mRNA [NM_001039885]                                         |
| A_24_P334300   | 0,8958852  | down | -1,0440611  | -0,0622061 | FGF12    | Homo sapiens fibroblast growth factor 12 (FGF12), transcript variant 2, mRNA [NM_004113]                                       |
| A_23_P24616    | 0,31082505 | up   | 1,1613384   | 0,21578847 | SIAE     | Homo sapiens sialic acid acetyltransferase (SIAE), transcript variant 1, mRNA [NM_170601]                                      |
| A_24_P73599    | 0,4642703  | down | -1,2477279  | -0,3193033 | IL16     | Homo sapiens interleukin 16 (IL16), transcript variant 2, mRNA [NM_172217]                                                     |
| A_23_P14892    | 0,75147676 | up   | 1,0908022   | 0,1253895  | IGFALS   | Homo sapiens insulin-like growth factor binding protein, acid labile subunit (IGFALS), transcript variant 2, mRNA [NM_004970]  |
| A_24_P60845    | 0,82238597 | up   | 1,0299517   | 0,04257667 | ACHE     | Homo sapiens acetylcholinesterase (Yt blood group) (ACHE), transcript variant E4-E6, mRNA [NM_000665]                          |
| A_33_P3340342  | 0,7210401  | up   | 1,0677977   | 0,0946383  | CMTM3    | Homo sapiens CKLF-like MARVEL transmembrane domain containing 3 (CMTM3), transcript variant 1, mRNA [NM_144601]                |
| A_33_P3235940  | 0,06648849 | up   | 11,334522   | 3,5026517  | KLK6     | Homo sapiens kallikrein-related peptidase 6 (KLK6), transcript variant B, mRNA [NM_001012964]                                  |
| A_23_P119222   | 0,7093186  | up   | 1,0915871   | 0,1264272  | RETN     | Homo sapiens resistin (RETN), transcript variant 1, mRNA [NM_020415]                                                           |
| A_23_P98147    | 0,7248737  | down | -1,0510098  | -0,0717761 | CPN1     | Homo sapiens carboxypeptidase N, polypeptide 1 (CPN1), mRNA [NM_001308]                                                        |
| A_33_P3423121  | 0,54318035 | down | -1,1855518  | -0,2455587 | RDX      | Homo sapiens radixin (RDX), transcript variant 1, mRNA [NM_001260492]                                                          |
| A_23_P154840   | 0,04950633 | down | -1,3157058  | -0,3958369 | SOD1     | Homo sapiens superoxide dismutase 1, soluble (SOD1), mRNA [NM_000454]                                                          |
| A_33_P3341586  | 0,56605357 | up   | 1,1255666   | 0,17065142 | SIL1     | Homo sapiens SIL1 nucleotide exchange factor (SIL1), transcript variant 1, mRNA [NM_001037633]                                 |
| A_23_P99076    | 0,06022827 | up   | 1,3900781   | 0,4751659  | PRH2     | Homo sapiens proline-rich protein Haell subfamily 2 (PRH2), transcript variant 1, mRNA [NM_005042]                             |
| A_33_P3387145  | 0,02122792 | up   | 1,3932657   | 0,4784704  | SH3KBP1  | Homo sapiens SH3-domain kinase binding protein 1 (SH3KBP1), transcript variant 1, mRNA [NM_031892]                             |
| A_24_P237175   | 0,8545447  | up   | 1,0656685   | 0,09175868 | CST2     | Homo sapiens cystatin SA (CST2), mRNA [NM_001322]                                                                              |
| A_24_P98161    | 0,17374851 | down | -1,2246224  | -0,2923369 | KRIT1    | Homo sapiens KRIT1, ankyrin repeat containing (KRIT1), transcript variant 4, mRNA [NM_194455]                                  |
| A_23_P70688    | 0,53878653 | up   | 1,1443509   | 0,19452949 | LY86     | Homo sapiens lymphocyte antigen 86 (LY86), mRNA [NM_004271]                                                                    |
| A_24_P71661    | 0,4163749  | up   | 1,1685972   | 0,22477776 | CRTAP    | Homo sapiens cartilage associated protein (CRTAP), mRNA [NM_006371]                                                            |
| A_23_P502047   | 0,77770454 | down | -1,0631459  | -0,0883396 | CHRD     | Homo sapiens chordin (CHRD), mRNA [NM_003741]                                                                                  |
| A_23_P133245   | 0,16760693 | down | -1,397838   | -0,4831972 | IK       | Homo sapiens IK cytokine, down-regulator of HLA II (IK), mRNA [NM_006083]                                                      |
| A_23_P1981     | 0,09353574 | up   | 1,2676328   | 0,34213695 | INS      | Homo sapiens insulin (INS), transcript variant 1, mRNA [NM_000207]                                                             |
| A_19_P00806911 | 0,58475083 | down | -1,067303   | -0,0939697 | NUDT3    | nudix (nucleoside diphosphate linked moiety X)-type motif 3 [Source:HGNC Symbol;Acc:HGNC:8050] [ENST00000607016]               |
| A_33_P3380612  | 0,36555845 | up   | 1,2363744   | 0,30611566 | HSPG2    | Homo sapiens heparan sulfate proteoglycan 2 (HSPG2), transcript variant 2, mRNA [NM_005529]                                    |
| A_23_P50638    | 0,8456727  | up   | 1,0359018   | 0,05088722 | LRG1     | Homo sapiens leucine-rich alpha-2-glycoprotein 1 (LRG1), mRNA [NM_052972]                                                      |
| A_33_P3342780  | 0,75334805 | down | -1,0747534  | -0,1040057 | ADAMTS13 | Homo sapiens ADAM metalloproteinase with thrombospondin type 1 motif, 13 (ADAMTS13), transcript variant 3, mRNA [NM_139026]    |
| A_33_P3296587  | 0,7458824  | up   | 1,1714219   | 0,22826076 | CP       | Homo sapiens ceruloplasmin (ferroxidase) (CP), transcript variant 1, mRNA [NM_000096]                                          |
| A_23_P214168   | 0,62458456 | down | -1,3116938  | -0,391431  | COL12A1  | Homo sapiens collagen, type XII, alpha 1 (COL12A1), transcript variant long, mRNA [NM_004370]                                  |
| A_23_P127891   | 0,33433864 | up   | 1,3338414   | 0,4155872  | BDNF     | Homo sapiens brain-derived neurotrophic factor (BDNF), transcript variant 1, mRNA [NM_170735]                                  |
| A_23_P429363   | 0,11092257 | down | -1,5227097  | -0,6066409 | FGF17    | Homo sapiens fibroblast growth factor 17 (FGF17), mRNA [NM_003867]                                                             |
| A_33_P3399267  | 0,646034   | down | -1,1038474  | -0,1425407 | IL15RA   | Homo sapiens interleukin 15 receptor, alpha (IL15RA), transcript variant 2, mRNA [NM_172200]                                   |
| A_24_P319647   | 0,38028252 | up   | 1,1937774   | 0,2555339  | FCRL2    | Homo sapiens Fc receptor-like 2 (FCRL2), transcript variant 1, mRNA [NM_030764]                                                |
| A_33_P3258801  | 0,04011323 | up   | 3,7630959   | 1,9119201  | SLURP1   | Homo sapiens secreted LY6/PLAUR domain containing 1 (SLURP1), mRNA [NM_020427]                                                 |
| A_23_P1083     | 0,6175711  | down | -1,1828359  | -0,24225   | GJA4     | Homo sapiens gap junction protein, alpha 4, 37kDa (GJA4), mRNA [NM_002060]                                                     |
| A_33_P3348714  | 0,02094986 | down | -3,1954486  | -1,6760185 | FGF9     | Homo sapiens fibroblast growth factor 9 (FGF9), mRNA [NM_002010]                                                               |
| A_33_P3210965  | 0,06283026 | down | -2,408892   | -1,2683697 | TCTN1    | Homo sapiens tectonic family member 1 (TCTN1), transcript variant 1, mRNA [NM_001082538]                                       |
| A_33_P3261293  | 0,33264962 | down | -1,4775397  | -0,5631968 | DKK3     | Homo sapiens dickkopf WNT signaling pathway inhibitor 3 (DKK3), transcript variant 1, mRNA [NM_015881]                         |
| A_33_P3306749  | 0,6172264  | up   | 1,123037    | 0,16740543 | OLFM1    | olfactomedin 1 [Source:HGNC Symbol;Acc:HGNC:17187] [ENST00000615948]                                                           |
| A_33_P3312730  | 0,08502335 | up   | 1,7653186   | 0,8199286  | BHLHA15  | Homo sapiens basic helix-loop-helix family, member a15 (BHLHA15), mRNA [NM_177455]                                             |
| A_23_P135722   | 0,5942069  | down | -1,2097735  | -0,274737  | BTC      | Homo sapiens betacellulin (BTC), mRNA [NM_001729]                                                                              |
| A_23_P34018    | 0,72269154 | up   | 1,0646168   | 0,09033424 | RPL39    | Homo sapiens ribosomal protein L39 (RPL39), mRNA [NM_001000]                                                                   |
| A_33_P3406623  | 0,77747667 | up   | 1,046529    | 0,06561237 | TNFSF12  | Homo sapiens tumor necrosis factor (ligand) superfamily, member 12 (TNFSF12), transcript variant 1, mRNA [NM_003809]           |
| A_32_P85999    | 0,5064058  | down | -1,6284243  | -0,7034766 | CDH13    | Homo sapiens cadherin 13 (CDH13), transcript variant 1, mRNA [NM_001257]                                                       |

|                |            |      |            |            |          |                                                                                                                                                                |
|----------------|------------|------|------------|------------|----------|----------------------------------------------------------------------------------------------------------------------------------------------------------------|
| A_23_P256603   | 0,23182333 | up   | 1,3095131  | 0,3890305  | MLLT4    | Homo sapiens myeloid/lymphoid or mixed-lineage leukemia (trithorax homolog, Drosophila); translocated to, 4 (MLLT4), transcript variant 1, mRNA [NM_001207008] |
| A_33_P3249305  | 0,8683143  | down | -1,0252254 | -0,0359411 | CHRD     | Homo sapiens chordin (CHRD), mRNA [NM_003741]                                                                                                                  |
| A_33_P3328609  | 0,0281057  | down | -1,534493  | -0,617762  | PKP4     | Homo sapiens plakophilin 4 (PKP4), transcript variant 1, mRNA [NM_003628]                                                                                      |
| A_23_P156708   | 0,03458871 | up   | 1,7020804  | 0,7672992  | TNXB     | Homo sapiens tenascin XB (TNXB), transcript variant XB-S, mRNA [NM_032470]                                                                                     |
| A_33_P3330264  | 0,5001052  | down | -1,7203431 | -0,7826963 | CXCL1    | Homo sapiens chemokine (C-X-C motif) ligand 1 (melanoma growth stimulating activity, alpha) (CXCL1), transcript variant 1, mRNA [NM_001511]                    |
| A_24_P37589    | 0,88032365 | up   | 1,0483704  | 0,06814847 | ACPP     | Homo sapiens acid phosphatase, prostate (ACPP), transcript variant 1, mRNA [NM_001099]                                                                         |
| A_24_P382119   | 0,34735253 | up   | 1,1258692  | 0,17103916 | MTMR4    | Homo sapiens myotubularin related protein 4 (MTMR4), mRNA [NM_004687]                                                                                          |
| A_33_P3385516  | 0,72256786 | down | -1,0659292 | -0,0921116 | CBLN4    | Homo sapiens cerebellin 4 precursor (CBLN4), mRNA [NM_080617]                                                                                                  |
| A_24_P295010   | 0,592242   | up   | 1,3589418  | 0,44248366 | SERPINB9 | Homo sapiens serpin peptidase inhibitor, clade B (ovalbumin), member 9 (SERPINB9), mRNA [NM_004155]                                                            |
| A_24_P824592   | 0,45077533 | down | -1,158825  | -0,2126628 | RBMX     | Homo sapiens RNA binding motif protein, X-linked (RBMX), transcript variant 1, mRNA [NM_002139]                                                                |
| A_23_P20022    | 0,68035406 | up   | 1,0764817  | 0,10632379 | HILPDA   | Homo sapiens hypoxia inducible lipid droplet-associated (HILPDA), transcript variant 1, mRNA [NM_013332]                                                       |
| A_33_P3283619  | 0,5633528  | up   | 1,2282429  | 0,29659587 | SH2D1A   | Homo sapiens SH2 domain containing 1A (SH2D1A), transcript variant 2, mRNA [NM_001114937]                                                                      |
| A_23_P78742    | 0,03632669 | up   | 1,3962021  | 0,48150778 | FLT3LG   | Homo sapiens fms-related tyrosine kinase 3 ligand (FLT3LG), transcript variant 3, mRNA [NM_001459]                                                             |
| A_23_P16992    | 0,27218512 | down | -1,1462282 | -0,1968943 | PKP4     | Homo sapiens plakophilin 4 (PKP4), transcript variant 1, mRNA [NM_003628]                                                                                      |
| A_24_P382187   | 0,8715293  | down | -1,037345  | -0,0528959 | IGFBP4   | Homo sapiens insulin-like growth factor binding protein 4 (IGFBP4), mRNA [NM_001552]                                                                           |
| A_33_P3317211  | 0,42748109 | up   | 1,1486459  | 0,1999341  | MECP2    | Homo sapiens methyl CpG binding protein 2 (MECP2), transcript variant 2, mRNA [NM_001110792]                                                                   |
| A_24_P216253   | 0,20817779 | up   | 1,1955162  | 0,25763372 | DLGAP4   | Homo sapiens discs, large (Drosophila) homolog-associated protein 4 (DLGAP4), transcript variant 1, mRNA [NM_014902]                                           |
| A_24_P402438   | 0,15223794 | up   | 1,8070904  | 0,8536687  | TGFB2    | Homo sapiens transforming growth factor, beta 2 (TGFB2), transcript variant 2, mRNA [NM_003238]                                                                |
| A_24_P261417   | 0,10695662 | down | -3,4777765 | -1,7981652 | DKK3     | Homo sapiens dickkopf WNT signaling pathway inhibitor 3 (DKK3), transcript variant 1, mRNA [NM_015881]                                                         |
| A_23_P434809   | 0,12560782 | up   | 3,9744287  | 1,9907475  | S100A8   | Homo sapiens S100 calcium binding protein A8 (S100A8), mRNA [NM_002964]                                                                                        |
| A_24_P208825   | 0,72921705 | up   | 1,0659962  | 0,09220225 | MUC4     | Homo sapiens mucin 4, cell surface associated (MUC4), transcript variant 1, mRNA [NM_018406]                                                                   |
| A_33_P3234124  | 0,0992045  | up   | 1,5054307  | 0,5901763  | FAM132B  | Homo sapiens family with sequence similarity 132, member B (FAM132B), mRNA [NM_001291832]                                                                      |
| A_23_P76102    | 0,4631011  | up   | 1,1899055  | 0,25084704 | GDF11    | Homo sapiens growth differentiation factor 11 (GDF11), mRNA [NM_005811]                                                                                        |
| A_24_P353619   | 0,34392866 | down | -1,6542075 | -0,7261402 | ALPL     | Homo sapiens alkaline phosphatase, liver/bone/kidney (ALPL), transcript variant 1, mRNA [NM_000478]                                                            |
| A_23_P366376   | 6,56E-04   | down | -3,2553055 | -1,7027929 | TGDF1    | Homo sapiens teratocarcinoma-derived growth factor 1 (TGDF1), transcript variant 1, mRNA [NM_003212]                                                           |
| A_33_P3347869  | 0,6173055  | down | -1,2893128 | -0,3666024 | C3       | Homo sapiens complement component 3 (C3), mRNA [NM_000064]                                                                                                     |
| A_23_P132718   | 0,11257168 | up   | 1,4553907  | 0,54140645 | SEMA3B   | Homo sapiens sema domain, immunoglobulin domain (Ig), short basic domain, secreted, (semaphorin) 3B (SEMA3B), transcript variant 1, mRNA [NM_004636]           |
| A_23_P47885    | 0,6121846  | down | -1,1259966 | -0,1712025 | LRIG3    | Homo sapiens leucine-rich repeats and immunoglobulin-like domains 3 (LRIG3), transcript variant 2, mRNA [NM_153377]                                            |
| A_33_P3214586  | 0,4880669  | up   | 1,1726326  | 0,22975104 | ARTN     | Homo sapiens artemin (ARTN), transcript variant 4, mRNA [NM_057090]                                                                                            |
| A_23_P154605   | 0,19342607 | down | -1,262889  | -0,3367279 | SULF2    | Homo sapiens sulfatase 2 (SULF2), transcript variant 1, mRNA [NM_018837]                                                                                       |
| A_23_P409438   | 0,0030961  | up   | 1,7097596  | 0,77379346 | IFNL2    | Homo sapiens interferon, lambda 2 (IFNL2), mRNA [NM_172138]                                                                                                    |
| A_33_P3296181  | 0,6788981  | up   | 1,0884646  | 0,12229451 | CCL3L3   | Homo sapiens chemokine (C-C motif) ligand 3-like 3 (CCL3L3), mRNA [NM_001001437]                                                                               |
| A_23_P202501   | 0,13422044 | down | -1,2272615 | -0,2954427 | RNLS     | Homo sapiens renalase, FAD-dependent amine oxidase (RNLS), transcript variant 1, mRNA [NM_001031709]                                                           |
| A_33_P3405848  | 0,10257061 | up   | 1,6825466  | 0,7506465  | TPO      | Homo sapiens thyroid peroxidase (TPO), transcript variant 2, mRNA [NM_175719]                                                                                  |
| A_33_P3364571  | 0,3874441  | up   | 1,1433744  | 0,19329795 | TNXB     | Homo sapiens tenascin XB (TNXB), transcript variant XB, mRNA [NM_019105]                                                                                       |
| A_23_P126593   | 0,77348995 | up   | 1,060691   | 0,08500443 | S100A11  | Homo sapiens S100 calcium binding protein A11 (S100A11), mRNA [NM_005620]                                                                                      |
| A_23_P88865    | 0,5083947  | up   | 1,1396811  | 0,1886302  | CMTM3    | Homo sapiens CKLF-like MARVEL transmembrane domain containing 3 (CMTM3), transcript variant 1, mRNA [NM_144601]                                                |
| A_23_P212830   | 0,6916855  | down | -1,1325382 | -0,1795597 | FGFR3    | Homo sapiens fibroblast growth factor receptor 3 (FGFR3), transcript variant 1, mRNA [NM_000142]                                                               |
| A_23_P35820    | 0,64608276 | up   | 1,0868905  | 0,12020654 | CFL1     | Homo sapiens cofilin 1 (non-muscle) (CFL1), mRNA [NM_005507]                                                                                                   |
| A_23_P2920     | 0,523338   | down | -1,3408113 | -0,4231062 | SERPINA3 | Homo sapiens serpin peptidase inhibitor, clade A (alpha-1 antitrypsinase, antitrypsin), member 3 (SERPINA3), mRNA [NM_001085]                                  |
| A_24_P87931    | 0,01730811 | up   | 1,6006074  | 0,67861944 | APOL1    | Homo sapiens apolipoprotein L, 1 (APOL1), transcript variant 2, mRNA [NM_145343]                                                                               |
| A_23_P436353   | 0,6597328  | down | -1,0884053 | -0,1222158 | MLLT4    | Homo sapiens myeloid/lymphoid or mixed-lineage leukemia (trithorax homolog, Drosophila); translocated to, 4 (MLLT4), transcript variant 4, mRNA [NM_001291964] |
| A_24_P92472    | 0,09320168 | up   | 2,016364   | 1,0117562  | CFI      | Homo sapiens complement factor I (CFI), mRNA [NM_000204]                                                                                                       |
| A_33_P3316273  | 0,45676517 | up   | 1,3526089  | 0,43574476 | CCL3     | Homo sapiens chemokine (C-C motif) ligand 3 (CCL3), mRNA [NM_002983]                                                                                           |
| A_23_P256158   | 0,16100192 | down | -1,6032919 | -0,6810371 | ADRA2C   | Homo sapiens adrenoceptor alpha 2C (ADRA2C), mRNA [NM_000683]                                                                                                  |
| A_23_P152620   | 0,8481366  | down | -1,049333  | -0,0694726 | TNFSF13  | Homo sapiens tumor necrosis factor (ligand) superfamily, member 13 (TNFSF13), transcript variant gamma, mRNA [NM_172088]                                       |
| A_33_P3418833  | 0,00935525 | down | -3,0313272 | -1,5999496 | FLRT3    | Homo sapiens fibronectin leucine rich transmembrane protein 3 (FLRT3), transcript variant 2, mRNA [NM_198391]                                                  |
| A_23_P132826   | 0,33447596 | down | -2,3027737 | -1,2033726 | SERPINI2 | Homo sapiens serpin peptidase inhibitor, clade I (pancrin), member 2 (SERPINI2), transcript variant 2, mRNA [NM_006217]                                        |
| A_23_P89665    | 0,16465548 | up   | 1,7423437  | 0,8010292  | KRT33B   | Homo sapiens keratin 33B, type I (KRT33B), mRNA [NM_002279]                                                                                                    |
| A_19_P00319514 | 0,287372   | up   | 1,9946884  | 0,99616337 | DPYSL3   | dihydropyrimidinase-like 3 [Source:HGNC Symbol;Acc:HGNC:3015] [ENST00000504965]                                                                                |
| A_23_P331928   | 0,28745237 | up   | 1,9629182  | 0,973      | CD109    | Homo sapiens CD109 molecule (CD109), transcript variant 1, mRNA [NM_133493]                                                                                    |
| A_24_P122746   | 0,1763144  | up   | 1,5682644  | 0,6491688  | VWA1     | Homo sapiens von Willebrand factor A domain containing 1 (VWA1), transcript variant 1, mRNA [NM_022834]                                                        |
| A_33_P3407034  | 0,774892   | up   | 1,1243284  | 0,16906345 | KIT      | Homo sapiens v-kit Hardy-Zuckerman 4 feline sarcoma viral oncogene homolog (KIT), transcript variant 1, mRNA [NM_000222]                                       |
| A_33_P3233906  | 0,30923423 | down | -2,1641803 | -1,1138207 | RAMP1    | Homo sapiens receptor (G protein-coupled) activity modifying protein 1 (RAMP1), mRNA [NM_005855]                                                               |
| A_23_P87072    | 0,00803863 | up   | 2,0300424  | 1,0215099  | PANX3    | Homo sapiens pannexin 3 (PANX3), mRNA [NM_052959]                                                                                                              |

|               |            |      |            |            |           |                                                                                                                                 |
|---------------|------------|------|------------|------------|-----------|---------------------------------------------------------------------------------------------------------------------------------|
| A_23_P214544  | 0,09293532 | up   | 1,2453116  | 0,3165068  | GPX5      | Homo sapiens glutathione peroxidase 5 (GPX5), transcript variant 1, mRNA [NM_001509]                                            |
| A_33_P3257297 | 0,02126138 | down | -5,5733166 | -2,4785361 | CFAP58    | Homo sapiens cilia and flagella associated protein 58 (CFAP58), mRNA [NM_001008723]                                             |
| A_24_P97526   | 0,49416405 | down | -1,1108797 | -0,1517025 | CMTM6     | Homo sapiens CKLF-like MARVEL transmembrane domain containing 6 (CMTM6), mRNA [NM_017801]                                       |
| A_33_P3313110 | 0,33713353 | up   | 1,5872755  | 0,66655254 | MUC16     | Homo sapiens mucin 16, cell surface associated (MUC16), mRNA [NM_024690]                                                        |
| A_23_P148297  | 0,7011049  | down | -1,0875611 | -0,1210965 | SH3BGRL   | Homo sapiens SH3 domain binding glutamate-rich protein like (SH3BGRL), mRNA [NM_003022]                                         |
| A_33_P3355266 | 0,32370967 | up   | 1,2851342  | 0,36191902 | TINAGL1   | Homo sapiens tubulointerstitial nephritis antigen-like 1 (TINAGL1), transcript variant 1, mRNA [NM_022164]                      |
| A_23_P141362  | 0,19826533 | up   | 1,2336552  | 0,30293924 | FZD2      | Homo sapiens frizzled class receptor 2 (FZD2), mRNA [NM_001466]                                                                 |
| A_23_P379550  | 0,47629362 | down | -1,1601946 | -0,2143669 | YARS      | Homo sapiens tyrosyl-tRNA synthetase (YARS), mRNA [NM_003680]                                                                   |
| A_33_P3399788 | 0,4695204  | down | -1,3531213 | -0,4362912 | SERPINA3  | Homo sapiens serpin peptidase inhibitor, clade A (alpha-1 antitrypsin, member 3 (SERPINA3), mRNA [NM_001085]                    |
| A_33_P3232557 | 0,8203894  | up   | 1,0568886  | 0,07982329 | DLGAP3    | Homo sapiens discs, large (Drosophila) homolog-associated protein 3 (DLGAP3), mRNA [NM_001080418]                               |
| A_23_P168288  | 0,14536443 | up   | 1,341982   | 0,4243653  | IL22RA2   | Homo sapiens interleukin 22 receptor, alpha 2 (IL22RA2), transcript variant 1, mRNA [NM_052962]                                 |
| A_23_P215296  | 0,43700308 | up   | 1,0875741  | 0,12111373 | CDK13     | Homo sapiens cyclin-dependent kinase 13 (CDK13), transcript variant 1, mRNA [NM_003718]                                         |
| A_33_P3288110 | 0,7896866  | down | -1,0378027 | -0,0535322 | PKP4      | Homo sapiens plakophilin 4 (PKP4), transcript variant 2, mRNA [NM_001005476]                                                    |
| A_23_P145841  | 0,09685496 | down | -1,387531  | -0,4725201 | SOSTDC1   | Homo sapiens sclerostin domain containing 1 (SOSTDC1), mRNA [NM_015464]                                                         |
| A_33_P3235706 | 0,48086086 | down | -1,1763501 | -0,2343175 | ZCCHC11   | Homo sapiens zinc finger, CCHC domain containing 11, mRNA (cDNA clone IMAGE:5505348), with apparent retained intron. [BC048301] |
| A_23_P109269  | 0,4888678  | up   | 1,1801448  | 0,23896387 | LAMA5     | Homo sapiens laminin, alpha 5 (LAMA5), mRNA [NM_005560]                                                                         |
| A_33_P3844650 | 0,8839788  | down | -1,0930297 | -0,1283326 | ANGPTL2   | Homo sapiens angiopoietin-like 2 (ANGPTL2), mRNA [NM_012098]                                                                    |
| A_33_P3384442 | 0,38080305 | up   | 1,1844143  | 0,24417377 | LAMA5     | laminin, alpha 5 [Source:HGNC Symbol;Acc:HGNC:6485] [ENST00000370677]                                                           |
| A_33_P3268472 | 0,05866381 | up   | 1,4063317  | 0,49193686 | CTSC      | Homo sapiens cathepsin C (CTSC), transcript variant 3, mRNA [NM_00111473]                                                       |
| A_23_P118203  | 0,8209614  | down | -1,1161977 | -0,1585926 | ZG16B     | Homo sapiens zymogen granule protein 16B (ZG16B), mRNA [NM_145252]                                                              |
| A_33_P3262635 | 0,37305042 | down | -1,2944251 | -0,3723115 | CECR1     | Homo sapiens cat eye syndrome chromosome region, candidate 1 (CECR1), transcript variant 3, mRNA [NM_001282225]                 |
| A_23_P79931   | 0,89576656 | up   | 1,0262312  | 0,03735575 | ATRN      | Homo sapiens attractin (ATRN), transcript variant 2, mRNA [NM_139322]                                                           |
| A_33_P3412900 | 0,40820563 | up   | 1,1646096  | 0,21984635 | CBLN3     | Homo sapiens cerebellin 3 precursor (CBLN3), mRNA [NM_001039771]                                                                |
| A_32_P70315   | 0,07823484 | down | -3,218522  | -1,6863984 | TIMP4     | Homo sapiens TIMP metalloproteinase inhibitor 4 (TIMP4), mRNA [NM_003256]                                                       |
| A_33_P3352253 | 0,1772861  | up   | 1,2862082  | 0,36312413 | MTUS1     | Homo sapiens microtubule associated tumor suppressor 1 (MTUS1), transcript variant 2, mRNA [NM_001001925]                       |
| A_23_P256735  | 0,67954034 | down | -1,106944  | -0,1465822 | CPQ       | Homo sapiens carboxypeptidase Q (CPQ), mRNA [NM_016134]                                                                         |
| A_33_P3470781 | 0,24342692 | down | -1,1759146 | -0,2337833 | RALGAPA2  | Homo sapiens Ral GTPase activating protein, alpha subunit 2 (catalytic) (RALGAPA2), mRNA [NM_020343]                            |
| A_23_P119535  | 0,08461414 | up   | 1,3789403  | 0,46356004 | EFNA2     | Homo sapiens ephrin-A2 (EFNA2), mRNA [NM_001405]                                                                                |
| A_33_P3346635 | 5,89E-05   | up   | 2,521466   | 1,3342627  | FAM20C    | Homo sapiens cDNA FLJ43291 fis, clone MESAN2015515. [AK125281]                                                                  |
| A_24_P49199   | 0,08539928 | down | -2,4486847 | -1,292007  | GLDN      | Homo sapiens gliomedin (GLDN), mRNA [NM_181789]                                                                                 |
| A_33_P3408203 | 0,48270914 | up   | 1,1106793  | 0,15144227 | TGFA      | Homo sapiens transforming growth factor, alpha (TGFA), transcript variant 1, mRNA [NM_003236]                                   |
| A_33_P3413483 | 0,7533235  | down | -1,1830748 | -0,2425413 | SORD      | sorbitol dehydrogenase [Source:HGNC Symbol;Acc:HGNC:11184] [ENST00000267814]                                                    |
| A_23_P371682  | 0,13423292 | up   | 1,6137241  | 0,6903939  | GPC6      | Homo sapiens glypican 6 (GPC6), mRNA [NM_005708]                                                                                |
| A_33_P3413987 | 0,6251195  | up   | 1,1221848  | 0,16631022 | SERPING1  | Homo sapiens serpin peptidase inhibitor, clade G (C1 inhibitor), member 1 (SERPING1), transcript variant 1, mRNA [NM_000062]    |
| A_23_P107313  | 0,8599073  | up   | 1,0307863  | 0,04374524 | SDF2      | Homo sapiens stromal cell-derived factor 2 (SDF2), transcript variant 1, mRNA [NM_006923]                                       |
| A_23_P71480   | 0,5500513  | up   | 1,3798883  | 0,46455148 | DEFB1     | Homo sapiens defensin, beta 1 (DEFB1), mRNA [NM_005218]                                                                         |
| A_23_P334727  | 0,7095305  | up   | 1,1585739  | 0,21235003 | NRG4      | Homo sapiens neuregulin 4 (NRG4), mRNA [NM_138573]                                                                              |
| A_24_P202558  | 0,3543259  | up   | 1,1337147  | 0,1810576  | SIPA1L3   | Homo sapiens signal-induced proliferation-associated 1 like 3 (SIPA1L3), mRNA [NM_015073]                                       |
| A_23_P111041  | 0,82251364 | down | -1,0622084 | -0,0870669 | HIST1H2BI | Homo sapiens histone cluster 1, H2bi (HIST1H2BI), mRNA [NM_003525]                                                              |
| A_23_P259955  | 0,8985509  | up   | 1,0182953  | 0,02615598 | GDF5      | Homo sapiens growth differentiation factor 5 (GDF5), mRNA [NM_000557]                                                           |
| A_33_P3231367 | 0,08303475 | down | -1,3863443 | -0,4712856 | ATXN10    | Homo sapiens ataxin 10 (ATXN10), transcript variant 1, mRNA [NM_013236]                                                         |
| A_33_P3332215 | 0,7366717  | up   | 1,1015995  | 0,13959976 | MUC1      | Homo sapiens mucin 1, cell surface associated (MUC1), transcript variant 7, mRNA [NM_001044392]                                 |
| A_23_P67198   | 0,36909485 | up   | 1,339849   | 0,4220704  | CPAMD8    | Homo sapiens C3 and PZP-like, alpha-2-macroglobulin domain containing 8 (CPAMD8), mRNA [NM_015692]                              |
| A_33_P3260014 | 0,70250493 | up   | 1,1374224  | 0,18576817 | TPO       | Homo sapiens thyroid peroxidase (TPO), transcript variant 4, mRNA [NM_175721]                                                   |
| A_33_P3372666 | 0,79460794 | down | -1,0862074 | -0,1192996 | PDGFA     | Homo sapiens platelet-derived growth factor alpha polypeptide (PDGFA), transcript variant 2, mRNA [NM_033023]                   |
| A_33_P3399263 | 0,61495423 | down | -1,0815102 | -0,1130473 | IL15RA    | Homo sapiens interleukin 15 receptor, alpha (IL15RA), transcript variant 3, mRNA [NM_001243539]                                 |
| A_23_P215491  | 0,5552272  | up   | 1,101786   | 0,13984406 | CCL24     | Homo sapiens chemokine (C-C motif) ligand 24 (CCL24), mRNA [NM_002991]                                                          |
| A_33_P3354646 | 0,05277462 | up   | 1,5626273  | 0,6439737  | PNLIPRP1  | Homo sapiens pancreatic lipase-related protein 1 (PNLIPRP1), transcript variant 1, mRNA [NM_006229]                             |
| A_24_P59220   | 0,31700823 | up   | 1,185945   | 0,24603714 | POTEF     | Homo sapiens POTE ankyrin domain family, member F (POTEF), mRNA [NM_001099771]                                                  |
| A_33_P3416668 | 0,08898424 | up   | 1,3770194  | 0,4615489  | VWA1      | Homo sapiens von Willebrand factor A domain containing 1 (VWA1), transcript variant 1, mRNA [NM_022834]                         |
| A_24_P276628  | 0,38646266 | up   | 1,1855582  | 0,24556649 | PPT1      | Homo sapiens palmitoyl-protein thioesterase 1 (PPT1), transcript variant 1, mRNA [NM_000310]                                    |
| A_24_P309317  | 0,54361063 | down | -1,1473416 | -0,198295  | PSAP      | Homo sapiens prosaposin (PSAP), transcript variant 2, mRNA [NM_001042465]                                                       |
| A_23_P501754  | 0,23369212 | up   | 2,7637632  | 1,466634   | CSF3      | Homo sapiens colony stimulating factor 3 (granulocyte) (CSF3), transcript variant 1, mRNA [NM_000759]                           |
| A_23_P253958  | 0,18079954 | down | -2,0769432 | -1,0544617 | LRRC17    | Homo sapiens leucine rich repeat containing 17 (LRRC17), transcript variant 2, mRNA [NM_005824]                                 |
| A_33_P3230990 | 0,10292421 | up   | 1,2566723  | 0,32960844 | SCUBE1    | Homo sapiens signal peptide, CUB domain, EGF-like 1 (SCUBE1), mRNA [NM_173050]                                                  |

|               |            |      |            |            |         |                                                                                                                                                                |
|---------------|------------|------|------------|------------|---------|----------------------------------------------------------------------------------------------------------------------------------------------------------------|
| A_33_P3351249 | 0,84909374 | up   | 1,0329068  | 0,04671004 | CXCL16  | Homo sapiens chemokine (C-X-C motif) ligand 16 (CXCL16), transcript variant 2, mRNA [NM_001100812]                                                             |
| A_33_P3272580 | 0,55729693 | down | -1,0879152 | -0,1215661 | FUCA2   | Homo sapiens fucosidase, alpha-L- 2, plasma (FUCA2), mRNA [NM_032020]                                                                                          |
| A_23_P301476  | 0,87063956 | up   | 1,0214499  | 0,03061848 | C3orf33 | Homo sapiens chromosome 3 open reading frame 33 (C3orf33), mRNA [NM_173657]                                                                                    |
| A_23_P380857  | 0,07673352 | up   | 1,419726   | 0,50561255 | APOL4   | Homo sapiens apolipoprotein L, 4 (APOL4), transcript variant a, mRNA [NM_030643]                                                                               |
| A_33_P3339100 | 0,11010718 | down | -1,7666724 | -0,8210345 | SELP    | Homo sapiens selectin P (granule membrane protein 140kDa, antigen CD62) (SELP), mRNA [NM_003005]                                                               |
| A_23_P392962  | 0,40488476 | up   | 1,2885958  | 0,36579978 | GRAP    | Homo sapiens GRB2-related adaptor protein (GRAP), mRNA [NM_006613]                                                                                             |
| A_33_P3402091 | 0,89560777 | down | -1,0452079 | -0,0637899 | MERTK   | Homo sapiens MER proto-oncogene, tyrosine kinase (MERTK), mRNA [NM_006343]                                                                                     |
| A_24_P6903    | 0,114137   | up   | 1,2622811  | 0,33603317 | ACTBL2  | Homo sapiens actin, beta-like 2 (ACTBL2), mRNA [NM_001017992]                                                                                                  |
| A_33_P3231653 | 0,5569534  | down | -1,1460892 | -0,1967193 | GOLM1   | Homo sapiens heat-like repeat family member 7 (GOLM1), transcript variant 1, mRNA [NM_016548]                                                                  |
| A_33_P3303245 | 0,7850331  | up   | 1,1347094  | 0,18232282 | KIT     | Homo sapiens v-kit Hardy-Zuckerman 4 feline sarcoma viral oncogene homolog (KIT), transcript variant 2, mRNA [NM_001093772]                                    |
| A_33_P3372840 | 0,425817   | up   | 1,2380005  | 0,30801192 | CXCL12  | Homo sapiens chemokine (C-X-C motif) ligand 12 (CXCL12), transcript variant 3, mRNA [NM_001033886]                                                             |
| A_23_P29953   | 0,04873305 | up   | 1,4007077  | 0,48615593 | IL15    | Homo sapiens interleukin 15 (IL15), transcript variant 2, mRNA [NM_172175]                                                                                     |
| A_33_P3329622 | 0,3221626  | down | -1,2075226 | -0,2720502 | MROH7   | maestro heat-like repeat family member 7 [Source:HGNC Symbol;Acc:HGNC:24802] [ENST00000395690]                                                                 |
| A_23_P377291  | 0,3359528  | up   | 1,198624   | 0,26137918 | TGFA    | Homo sapiens transforming growth factor, alpha (TGFA), transcript variant 1, mRNA [NM_003236]                                                                  |
| A_33_P3311145 | 0,70167017 | down | -1,1028802 | -0,1412761 | CEP164  | Homo sapiens centrosomal protein 164kDa (CEP164), transcript variant 2, mRNA [NM_001271933]                                                                    |
| A_24_P371399  | 0,8563764  | down | -1,0319916 | -0,0454312 | C3orf58 | Homo sapiens chromosome 3 open reading frame 58 (C3orf58), transcript variant 1, mRNA [NM_173552]                                                              |
| A_23_P3956    | 0,18699248 | up   | 1,3430065  | 0,42546627 | C1QTNF1 | Homo sapiens C1q and tumor necrosis factor related protein 1 (C1QTNF1), transcript variant 4, mRNA [NM_198594]                                                 |
| A_23_P34888   | 0,17193958 | up   | 1,357653   | 0,4411148  | CHIA    | Homo sapiens chitinase, acidic (CHIA), transcript variant 2, mRNA [NM_021797]                                                                                  |
| A_23_P28318   | 0,67128927 | down | -1,0470307 | -0,0663037 | NDUFAF7 | Homo sapiens NADH dehydrogenase (ubiquinone) complex I, assembly factor 7 (NDUFAF7), transcript variant 1, mRNA [NM_144736]                                    |
| A_33_P3306163 | 0,17283784 | up   | 1,3173583  | 0,39764774 | LGALS3  | Homo sapiens lectin, galactoside-binding, soluble, 3 (LGALS3), transcript variant 3, mRNA [NM_001177388]                                                       |
| A_23_P145485  | 0,32670273 | up   | 1,5307728  | 0,6142602  | ULBP2   | Homo sapiens UL16 binding protein 2 (ULBP2), mRNA [NM_025217]                                                                                                  |
| A_33_P3276615 | 0,634161   | up   | 1,1738092  | 0,23119788 | APOL4   | Homo sapiens apolipoprotein L, 4 (APOL4), transcript variant a, mRNA [NM_030643]                                                                               |
| A_24_P339416  | 0,28651828 | down | -1,1729959 | -0,230198  | ARSG    | Homo sapiens arylsulfatase G (ARSG), transcript variant 1, mRNA [NM_014960]                                                                                    |
| A_33_P3233105 | 0,0955682  | up   | 1,5760201  | 0,65628594 | MLLT4   | Homo sapiens myeloid/lymphoid or mixed-lineage leukemia (trithorax homolog, Drosophila); translocated to, 4 (MLLT4), transcript variant 1, mRNA [NM_001207008] |
| A_33_P3317058 | 0,4905636  | down | -1,2248179 | -0,2925672 | STAG3   | Homo sapiens stromal antigen 3 (STAG3), transcript variant 3, mRNA [NM_001282717]                                                                              |
| A_32_P15320   | 0,17994308 | down | -1,2846336 | -0,361357  | EEF1A1  | Homo sapiens eukaryotic translation elongation factor 1 alpha 1 (EEF1A1), mRNA [NM_001402]                                                                     |
| A_23_P40611   | 0,667017   | down | -1,1626369 | -0,2174006 | TCN2    | Homo sapiens transcobalamin II (TCN2), transcript variant 1, mRNA [NM_000355]                                                                                  |
| A_24_P101114  | 0,48197684 | up   | 1,104606   | 0,1435319  | CNOT1   | Homo sapiens CCR4-NOT transcription complex, subunit 1 (CNOT1), transcript variant 2, mRNA [NM_206999]                                                         |
| A_24_P335305  | 0,5190497  | up   | 1,19342    | 0,25510192 | OAS3    | Homo sapiens 2'-5'-oligoadenylate synthetase 3, 100kDa (OAS3), mRNA [NM_006187]                                                                                |
| A_33_P3407606 | 0,19080658 | up   | 1,3917339  | 0,47688338 | MSN     | moesin [Source:HGNC Symbol;Acc:HGNC:7373] [ENST00000447323]                                                                                                    |
| A_23_P131588  | 0,36304945 | up   | 1,1663558  | 0,222008   | BMP10   | Homo sapiens bone morphogenetic protein 10 (BMP10), mRNA [NM_014482]                                                                                           |
| A_23_P315964  | 0,54541415 | down | -1,2056438 | -0,2698037 | UMODL1  | Homo sapiens uromodulin-like 1 (UMODL1), transcript variant 2, mRNA [NM_173568]                                                                                |
| A_33_P3392787 | 0,04803197 | down | -4,24121   | -2,084476  | CFAP58  | Homo sapiens cilia and flagella associated protein 58 (CFAP58), mRNA [NM_001008723]                                                                            |
| A_23_P207125  | 0,43707907 | up   | 1,2382698  | 0,30832568 | NLGN2   | Homo sapiens neuroligin 2 (NLGN2), mRNA [NM_020795]                                                                                                            |
| A_24_P90881   | 0,45655242 | down | -1,1355046 | -0,1833336 | CES3    | Homo sapiens carboxylesterase 3 (CES3), transcript variant 1, mRNA [NM_024922]                                                                                 |
| A_33_P3280471 | 0,13943313 | up   | 1,4299548  | 0,5159695  | ERBB3   | Homo sapiens v-erb-b2 avian erythroblastic leukemia viral oncogene homolog 3 (ERBB3), transcript variant 1, mRNA [NM_001982]                                   |
| A_23_P302060  | 0,7240567  | up   | 1,1404339  | 0,18958284 | IFNE    | Homo sapiens interferon, epsilon (IFNE), mRNA [NM_176891]                                                                                                      |
| A_33_P3259393 | 0,54344565 | up   | 1,2966665  | 0,37480748 | HAPLN3  | Homo sapiens hyaluronan and proteoglycan link protein 3 (HAPLN3), mRNA [NM_178232]                                                                             |
| A_33_P3389872 | 0,05323265 | up   | 1,5117273  | 0,59619796 | LRRK2   | Homo sapiens cDNA FLJ45829 fis, clone NT2RP8006452. [AK127729]                                                                                                 |
| A_33_P3252286 | 0,22820003 | down | -1,814023  | -0,8591927 | CRLF1   | Homo sapiens cytokine receptor-like factor 1 (CRLF1), mRNA [NM_004750]                                                                                         |
| A_33_P3349927 | 0,8739408  | up   | 1,040991   | 0,05795752 | WDR60   | WD repeat domain 60 [Source:HGNC Symbol;Acc:HGNC:21862] [ENST00000467220]                                                                                      |
| A_23_P146644  | 0,80569434 | down | -1,0401087 | -0,0567343 | ANXA2   | Homo sapiens annexin A2 (ANXA2), transcript variant 2, mRNA [NM_001002857]                                                                                     |
| A_33_P3365193 | 0,7900772  | up   | 1,0856045  | 0,11849867 | AMY1C   | Homo sapiens amylase, alpha 1C (salivary) (AMY1C), mRNA [NM_001008219]                                                                                         |
| A_23_P72117   | 0,08431177 | down | -1,461839  | -0,5477844 | SMPDL3A | Homo sapiens sphingomyelin phosphodiesterase, acid-like 3A (SMPDL3A), transcript variant 1, mRNA [NM_006714]                                                   |
| A_33_P3287646 | 0,12882863 | up   | 1,4261743  | 0,5121503  | HSPB1   | Homo sapiens heat shock 27kDa protein 1 (HSPB1), mRNA [NM_001540]                                                                                              |
| A_33_P3259708 | 0,8538798  | up   | 1,0508524  | 0,07156007 | CMA1    | Homo sapiens chymase 1, mast cell (CMA1), mRNA [NM_001836]                                                                                                     |
| A_32_P80850   | 0,00508212 | up   | 2,6538956  | 1,4081116  | COL14A1 | Homo sapiens collagen, type XIV, alpha 1 (COL14A1), mRNA [NM_021110]                                                                                           |
| A_33_P3364869 | 0,20327616 | up   | 1,5212923  | 0,6052974  | NAMPT   | Homo sapiens cDNA FLJ13279 fis, clone OVARC1001055, moderately similar to PRE-B CELL ENHANCING FACTOR PRECURSOR. [AK023341]                                    |
| A_33_P3366064 | 0,8924859  | up   | 1,0396273  | 0,05606644 | SOGA1   | Homo sapiens suppressor of glucose, autophagy associated 1 (SOGA1), transcript variant 2, mRNA [NM_199181]                                                     |
| A_24_P377124  | 0,48634213 | up   | 1,2029711  | 0,26660198 | THPO    | Homo sapiens thrombopoietin (THPO), transcript variant 1, mRNA [NM_000460]                                                                                     |
| A_33_P3317442 | 0,6492799  | up   | 1,1279675  | 0,17372547 | MCF2L   | Homo sapiens MCF.2 cell line derived transforming sequence-like (MCF2L), transcript variant 2, mRNA [NM_024979]                                                |
| A_33_P3334398 | 0,6190877  | up   | 1,1044418  | 0,14331734 | CA6     | Homo sapiens carbonic anhydrase VI (CA6), transcript variant 2, mRNA [NM_001270500]                                                                            |
