# Supplementary material for: Early Reduction of SARS-CoV-2 Replication in Bronchial Epithelium by Kinin B2 Receptor Antagonism
Source: bioRxiv or medRxiv preprint supplement (doi:10.1101/2021.08.13.21262037), 2021-08-18
Supplement: Supplementary file [file media-4.pdf]

**Supplemental Table S2.** DEGs from transcriptome analysis filtered on kallikreins from nasal scrapings from SARS-CoV-2 acute positive patients compared to negative patients

| ProbeName  | p ([pos acute] | Regulation ([ | FC (abs)  | ([po: FC  | ([pos acut | Log FC | ([pos | GeneSymbol                                                                                    | Description |
|------------|----------------|---------------|-----------|-----------|------------|--------|-------|-----------------------------------------------------------------------------------------------|-------------|
| A_33_P3215 | 0,07512057     | up            | 1,4754667 | 1,4754667 | 0,56117135 |        | KLK3  | kallikrein-related peptidase 3 [Source:HGNC Symbol;Acc:HGNC:6364] [ENST00000595151]           |             |
| A_23_P3102 | 1              | up            | 1,1165178 | 1,1165178 | 0,15900622 |        | KLK2  | Homo sapiens kallikrein-related peptidase 2 (KLK2), transcript variant 2, mRNA [NM_001002231] |             |
| A_24_P5750 | 0,18051589     | up            | 1,4157342 | 1,4157342 | 0,5015504  |        | KLK2  | Homo sapiens kallikrein-related peptidase 2 (KLK2), transcript variant 1, mRNA [NM_005551]    |             |
| A_33_P3251 | 1              | up            | 1,2278229 | 1,2278229 | 0,29610246 |        | KLK13 | kallikrein-related peptidase 13 [Source:HGNC Symbol;Acc:HGNC:6361] [ENST00000602090]          |             |
| A_23_P1015 | 0,16285726     | up            | 1,7061496 | 1,7061496 | 0,77074414 |        | KLK11 | Homo sapiens kallikrein-related peptidase 11 (KLK11), transcript variant 2, mRNA [NM_144947]  |             |
| A_23_P1625 | 1              | up            | 1,2936851 | 1,2936851 | 0,37148646 |        | KLK1  | Homo sapiens kallikrein 1 (KLK1), mRNA [NM_002257]                                            |             |
| A_24_P3760 | 1              | up            | 1,3677056 | 1,3677056 | 0,4517577  |        | KLK4  | Homo sapiens kallikrein-related peptidase 4 (KLK4), transcript variant 1, mRNA [NM_004917]    |             |
| A_33_P3417 | 1              | up            | 5,2178    | 5,2178    | 2,3834417  |        | KLK14 | Homo sapiens kallikrein-related peptidase 14 (KLK14), mRNA [NM_022046]                        |             |
| A_23_P3905 | 1              | up            | 14,396585 | 14,396585 | 3,8476548  |        | KLK7  | Homo sapiens kallikrein-related peptidase 7 (KLK7), transcript variant 1, mRNA [NM_005046]    |             |
| A_23_P3693 | 1              | up            | 14,018521 | 14,018521 | 3,8092623  |        | KLK8  | Homo sapiens kallikrein-related peptidase 8 (KLK8), transcript variant 2, mRNA [NM_144505]    |             |
| A_23_P5000 | 0,01925241     | up            | 15,19849  | 15,19849  | 3,925856   |        | KLK12 | Homo sapiens kallikrein-related peptidase 12 (KLK12), transcript variant 2, mRNA [NM_145894]  |             |
| A_33_P3398 | 0,00995833     | up            | 8,533642  | 8,533642  | 3,0931616  |        | KLK9  | Homo sapiens kallikrein-related peptidase 9 (KLK9), mRNA [NM_012315]                          |             |
| A_23_P1534 | 0,00814065     | up            | 11,039466 | 11,039466 | 3,4645984  |        | KLK5  | Homo sapiens kallikrein-related peptidase 5 (KLK5), transcript variant 1, mRNA [NM_012427]    |             |
| A_33_P3235 | 0,06648849     | up            | 11,334522 | 11,334522 | 3,5026517  |        | KLK6  | Homo sapiens kallikrein-related peptidase 6 (KLK6), transcript variant B, mRNA [NM_001012964] |             |
| A_24_P2369 | 1              | up            | 4,5679436 | 4,5679436 | 2,1915448  |        | KLK6  | Homo sapiens kallikrein-related peptidase 6 (KLK6), transcript variant B, mRNA [NM_001012964] |             |
| A_33_P3417 | 0,16268907     | up            | 3,0919542 | 3,0919542 | 1,6285189  |        | KLK10 | Homo sapiens kallikrein-related peptidase 10 (KLK10), transcript variant 1, mRNA [NM_002776]  |             |
| A_24_P4166 | 0,07144744     | up            | 6,230724  | 6,230724  | 2,6393998  |        | KLK13 | Homo sapiens kallikrein-related peptidase 13 (KLK13), mRNA [NM_015596]                        |             |
| A_24_P3336 | 0,0683104      | up            | 5,4190063 | 5,4190063 | 2,4380283  |        | KLK13 | Homo sapiens kallikrein-related peptidase 13 (KLK13), mRNA [NM_015596]                        |             |
