# Supplementary material for: Early Reduction of SARS-CoV-2 Replication in Bronchial Epithelium by Kinin B2 Receptor Antagonism
Source: bioRxiv or medRxiv preprint supplement (doi:10.1101/2021.08.13.21262037), 2021-08-18
Supplement: Supplementary file [file media-5.pdf]

**Supplemental Table S3.** DEGs from transcriptome analysis filtered on kinin-kallikrein-system members from nasal scrapings from SARS-CoV-2 acute positive patients compared to negative patients

| ProbeName  | p ([pos post] | Regulation ([f | FC (abs) ([po: | FC ([pos post | Log FC ([pos | GeneSymbol | Description                                                                                                                  |
|------------|---------------|----------------|----------------|---------------|--------------|------------|------------------------------------------------------------------------------------------------------------------------------|
| A_24_P2601 | 1             | up             | 4,4537134      | 4,4537134     | 2,1550088    | MME        | Homo sapiens membrane metallo-endopeptidase (MME), transcript variant 2b, mRNA [NM_007289]                                   |
| A_33_P3370 | 0,03633852    | up             | 5,9069815      | 5,9069815     | 2,562421     | MME        | Homo sapiens membrane metallo-endopeptidase (MME), transcript variant 2b, mRNA [NM_007289]                                   |
| A_33_P3290 | 0,04381223    | up             | 3,7117934      | 3,7117934     | 1,8921164    | MME        | Homo sapiens membrane metallo-endopeptidase (MME), transcript variant 2b, mRNA [NM_007289]                                   |
| A_23_P1279 | 0,06497923    | down           | 1,3449621      | -1,3449621    | -0,4275655   | PRCP       | Homo sapiens prolylcarboxypeptidase (angiotensinase C) (PRCP), transcript variant 2, mRNA [NM_199418]                        |
| A_33_P3233 | 0,04036628    | down           | 1,856378       | -1,856378     | -0,8924905   | F12        | Homo sapiens coagulation factor XII (Hageman factor) (F12), mRNA [NM_000505]                                                 |
| A_33_P3305 | 0,02187797    | down           | 1,8841604      | -1,8841604    | -0,9139218   | NOS3       | Homo sapiens nitric oxide synthase 3 (endothelial cell) (NOS3), transcript variant 1, mRNA [NM_000603]                       |
| A_23_P3048 | 0,00288877    | up             | 1,6989697      | 1,6989697     | 0,7646601    | BDKRB2     | Homo sapiens bradykinin receptor B2 (BDKRB2), mRNA [NM_000623]                                                               |
| A_23_P1391 | 0,40203622    | up             | 1,4733071      | 1,4733071     | 0,5590582    | SERPING1   | Homo sapiens serpin peptidase inhibitor, clade G (C1 inhibitor), member 1 (SERPING1), transcript variant 1, mRNA [NM_000062] |
| A_33_P3215 | 0,00128211    | up             | 1,9917675      | 1,9917675     | 0,99404925   | KLK3       | kallikrein-related peptidase 3 [Source:HGNC Symbol;Acc:HGNC:6364] [ENST00000595151]                                          |
| A_33_P3413 | 0,17071521    | up             | 2,0435178      | 2,0435178     | 1,0310549    | SERPING1   | Homo sapiens serpin peptidase inhibitor, clade G (C1 inhibitor), member 1 (SERPING1), transcript variant 1, mRNA [NM_000062] |
| A_23_P3463 | 0,3897618     | up             | 1,3292397      | 1,3292397     | 0,41060132   | REN        | Homo sapiens renin (REN), mRNA [NM_000537]                                                                                   |
| A_23_P1287 | 0,01012241    | up             | 1,7931846      | 1,7931846     | 0,84252405   | BDKRB1     | Homo sapiens bradykinin receptor B1 (BDKRB1), mRNA [NM_000710]                                                               |
| A_33_P3413 | 0,08619295    | up             | 1,5809374      | 1,5809374     | 0,6607802    | SERPING1   | Homo sapiens serpin peptidase inhibitor, clade G (C1 inhibitor), member 1 (SERPING1), transcript variant 1, mRNA [NM_000062] |
| A_23_P2529 | 0,31028056    | up             | 1,2636952      | 1,2636952     | 0,33764857   | ACE2       | Homo sapiens angiotensin I converting enzyme 2 (ACE2), mRNA [NM_021804]                                                      |
| A_23_P9814 | 0,1239582     | up             | 1,208384       | 1,208384      | 0,27307904   | CPN1       | Homo sapiens carboxypeptidase N, polypeptide 1 (CPN1), mRNA [NM_001308]                                                      |
| A_33_P3235 | 0,39434123    | up             | 2,7426543      | 2,7426543     | 1,4555727    | KLK6       | Homo sapiens kallikrein-related peptidase 6 (KLK6), transcript variant B, mRNA [NM_001012964]                                |
| A_24_P4166 | 0,55089855    | up             | 1,7370806      | 1,7370806     | 0,79666466   | KLK13      | Homo sapiens kallikrein-related peptidase 13 (KLK13), mRNA [NM_015596]                                                       |
| A_24_P3336 | 0,5001939     | up             | 1,743478       | 1,743478      | 0,8019681    | KLK13      | Homo sapiens kallikrein-related peptidase 13 (KLK13), mRNA [NM_015596]                                                       |
| A_24_P2369 | 1             | up             | 1,7377607      | 1,7377607     | 0,7972294    | KLK6       | Homo sapiens kallikrein-related peptidase 6 (KLK6), transcript variant B, mRNA [NM_001012964]                                |
| A_33_P3251 | 1             | up             | 1,9308945      | 1,9308945     | 0,9492693    | KLK13      | kallikrein-related peptidase 13 [Source:HGNC Symbol;Acc:HGNC:6361] [ENST00000602090]                                         |
| A_23_P2122 | 1             | up             | 1,7885467      | 1,7885467     | 0,83878773   | KNG1       | Homo sapiens kininogen 1 (KNG1), transcript variant 2, mRNA [NM_000893]                                                      |
