# Supplementary material for: Early Reduction of SARS-CoV-2 Replication in Bronchial Epithelium by Kinin B2 Receptor Antagonism
Source: bioRxiv or medRxiv preprint supplement (doi:10.1101/2021.08.13.21262037), 2021-08-18
Supplement: Supplementary file [file media-6.pdf]

**Supplemental Table S4. DEGs comparing SARS-CoV-2 + B2R antagonist versus SARS-CoV-2**

| ProbeName     | p ([SARS-CoV-2:Regulation]) | FC ([SARS-CoV-2:Regulation]) | GeneSymbol | Description |                                                                                                                           |
|---------------|-----------------------------|------------------------------|------------|-------------|---------------------------------------------------------------------------------------------------------------------------|
| A_23_P91970   | 0,031047111                 | down                         | -1,5092839 | AADACL2     | Homo sapiens arylacetamide deacetylase-like 2 (AADACL2), mRNA [NM_207365]                                                 |
| A_33_P3366161 | 0,010631708                 | down                         | -2,1879694 | ABAT        | Homo sapiens 4-aminobutyrate aminotransferase (ABAT), transcript variant 2, mRNA [NM_000663]                              |
| A_23_P24774   | 0,019292368                 | down                         | -2,6067395 | ABCC8       | Homo sapiens ATP-binding cassette, sub-family C (CFTR/MRP), member 8 (ABCC8), transcript variant 2, mRNA [NM_000352]      |
| A_23_P119763  | 0,033049513                 | down                         | -1,9194201 | ABCG5       | Homo sapiens ATP-binding cassette, sub-family G (WHITE), member 5 (ABCG5), mRNA [NM_022436]                               |
| A_33_P3333480 | 0,00399051                  | down                         | -1,6237004 | ABHD11-AS1  | Homo sapiens ABHD11 antisense RNA 1 (tail to tail) (ABHD11-AS1), long non-coding RNA [NR_026690]                          |
| A_23_P366035  | 0,031300526                 | down                         | -1,7492104 | ABHD12B     | Homo sapiens abhydrolase domain containing 12B (ABHD12B), transcript variant 1, mRNA [NM_001206673]                       |
| A_23_P376727  | 0,028580409                 | down                         | -2,0238543 | ACMSD       | Homo sapiens aminocarboxymuconate semialdehyde decarboxylase (ACMSD), mRNA [NM_138326]                                    |
| A_33_P3352517 | 3,58E-04                    | down                         | -2,8436701 | ACOT6       | Homo sapiens acyl-CoA thioesterase 6 (ACOT6), mRNA [NM_001037162]                                                         |
| A_23_P330419  | 0,03193642                  | down                         | -2,072469  | ACPT        | Homo sapiens acid phosphatase, testicular (ACPT), mRNA [NM_033068]                                                        |
| A_33_P3382849 | 0,0203917                   | down                         | -1,8869588 | ACR         | Homo sapiens acrosin (ACR), mRNA [NM_001097]                                                                              |
| A_33_P3265129 | 0,008068424                 | down                         | -2,23569   | ACSM2A      | Homo sapiens cDNA FLJ34659 fis, clone KIDNE2018863. [AK091978]                                                            |
| A_24_P92680   | 0,0381286                   | down                         | -1,7189307 | ACTA2-AS1   | Homo sapiens ACTA2 antisense RNA 1 (ACTA2-AS1), long non-coding RNA [NR_125373]                                           |
| A_33_P3236382 | 0,040037736                 | down                         | -1,5442077 | ACTC1       | Homo sapiens actin, alpha, cardiac muscle 1 (ACTC1), mRNA [NM_005159]                                                     |
| A_33_P3345011 | 0,035479486                 | down                         | -1,8101462 | ACTL9       | Homo sapiens actin-like 9 (ACTL9), mRNA [NM_178525]                                                                       |
| A_33_P3864411 | 0,001478873                 | down                         | -1,9494934 | ACTR3BP5    | Homo sapiens ACTR3B pseudogene 5 (ACTR3BP5), non-coding RNA [NR_045000]                                                   |
| A_23_P147311  | 0,002560156                 | down                         | -1,7518705 | ACTRT1      | Homo sapiens actin-related protein T1 (ACTRT1), mRNA [NM_138289]                                                          |
| A_23_P148829  | 0,023806369                 | down                         | -1,5880963 | ACTRT2      | Homo sapiens actin-related protein T2 (ACTRT2), mRNA [NM_080431]                                                          |
| A_24_P945113  | 0,0275925                   | down                         | -1,5558444 | ACVRL1      | Homo sapiens activin A receptor type II-like 1 (ACVRL1), transcript variant 1, mRNA [NM_000020]                           |
| A_23_P72527   | 0,04390732                  | down                         | -1,627356  | ADAM18      | Homo sapiens ADAM metalloproteinase domain 18 (ADAM18), transcript variant 1, mRNA [NM_014237]                            |
| A_23_P367420  | 0,040144276                 | up                           | 1,7933259  | ADAM21      | Homo sapiens ADAM metalloproteinase domain 21 (ADAM21), mRNA [NM_003813]                                                  |
| A_23_P95536   | 0,018302761                 | down                         | -2,1320918 | ADAM29      | Homo sapiens ADAM metalloproteinase domain 29 (ADAM29), transcript variant 1, mRNA [NM_014269]                            |
| A_23_P44648   | 0,034182634                 | down                         | -1,856451  | ADAMTS12    | Homo sapiens ADAM metalloproteinase with thrombospondin type 1 motif, 12 (ADAMTS12), mRNA [NM_030955]                     |
| A_23_P321307  | 0,006446154                 | down                         | -2,5941637 | ADAMTS2     | Homo sapiens ADAM metalloproteinase with thrombospondin type 1 motif, 2 (ADAMTS2), transcript variant 2, mRNA [NM_021599] |
| A_32_P29954   | 0,012432293                 | down                         | -2,5164652 | ADARB2-AS1  | Homo sapiens ADARB2 antisense RNA 1 (ADARB2-AS1), long non-coding RNA [NR_033387]                                         |
| A_23_P169993  | 0,017135117                 | down                         | -1,6758021 | ADCY8       | Homo sapiens adenylate cyclase 8 (brain) (ADCY8), mRNA [NM_001115]                                                        |
| A_23_P81158   | 0,003657068                 | down                         | -3,4838548 | ADH1C       | Homo sapiens alcohol dehydrogenase 1C (class I), gamma polypeptide (ADH1C), mRNA [NM_000669]                              |
| A_32_P423691  | 0,010570923                 | down                         | -1,5737296 | ADIG        | Homo sapiens adipogenin (ADIG), mRNA [NM_001018082]                                                                       |
| A_21_P0000571 | 0,008775                    | down                         | -1,5772151 | ADORA2A-AS1 | Homo sapiens ADORA2A antisense RNA 1 (ADORA2A-AS1), transcript variant 1, long non-coding RNA [NR_028484]                 |
| A_21_P0000570 | 0,01825944                  | down                         | -1,7880782 | ADORA2A-AS1 | Homo sapiens ADORA2A antisense RNA 1 (ADORA2A-AS1), transcript variant 2, long non-coding RNA [NR_028483]                 |
| A_23_P168993  | 0,003327001                 | down                         | -3,0895123 | ADRB3       | Homo sapiens adrenoceptor beta 3 (ADRB3), mRNA [NM_000025]                                                                |
| A_33_P3293888 | 6,50E-04                    | down                         | -3,0700345 | AFF2        | Homo sapiens AF4/FMR2 family, member 2 (AFF2), transcript variant 1, mRNA [NM_002025]                                     |
| A_33_P3373348 | 0,005118633                 | down                         | -2,6155484 | AFF3        | AF4/FMR2 family, member 3 [Source:HGNC Symbol;Acc:HGNC:6473] [ENST00000483600]                                            |
| A_33_P3378081 | 0,045776542                 | down                         | -1,8695127 | AGBL1       | Homo sapiens ATP/GTP binding protein-like 1 (AGBL1), mRNA [NM_152336]                                                     |
| A_33_P3378061 | 0,034953818                 | down                         | -1,910332  | AGBL3       | Homo sapiens ATP/GTP binding protein-like 3 (AGBL3), mRNA [NM_178563]                                                     |
| A_23_P62309   | 0,027139816                 | down                         | -1,5687008 | AGTR2       | Homo sapiens angiotensin II receptor, type 2 (AGTR2), mRNA [NM_000686]                                                    |
| A_33_P3376493 | 0,033458207                 | down                         | -1,8630021 | AGTR2       | Homo sapiens angiotensin II receptor, type 2 (AGTR2), mRNA [NM_000686]                                                    |
| A_24_P933685  | 0,010968552                 | down                         | -1,8081734 | AGVR6190    | PREDICTED: Homo sapiens AGVR6190 (LOC643797), misc_RNA [XR_109223]                                                        |
| A_33_P3250857 | 0,015817668                 | down                         | -1,7025341 | AIDA        | axin interactor, dorsalization associated [Source:HGNC Symbol;Acc:HGNC:25761] [ENST00000474863]                           |
| A_33_P3319231 | 0,014342361                 | down                         | -2,0619934 | AIFM2       | apoptosis-inducing factor, mitochondrion-associated, 2 [Source:HGNC Symbol;Acc:HGNC:21411] [ENST00000373248]              |
| A_24_P342632  | 0,0286455                   | down                         | -2,01527   | AK5         | Homo sapiens adenylate kinase 5 (AK5), transcript variant 1, mRNA [NM_174858]                                             |
| A_33_P3384078 | 0,009886637                 | down                         | -2,200895  | AK9         | Homo sapiens cDNA FLJ16163 fis, clone BRCAN2014229. [AK131244]                                                            |
| A_23_P313652  | 0,046302255                 | down                         | -2,0710914 | AKAP14      | Homo sapiens A kinase (PRKA) anchor protein 14 (AKAP14), transcript variant 1, mRNA [NM_178813]                           |
| A_33_P3417920 | 1,77E-04                    | down                         | -2,8426435 | AKAP4       | Homo sapiens A kinase (PRKA) anchor protein 4 (AKAP4), transcript variant 1, mRNA [NM_003886]                             |
| A_33_P3263569 | 0,016882548                 | down                         | -1,7288859 | AKNAD1      | Homo sapiens AKNA domain containing 1 (AKNAD1), transcript variant 1, mRNA [NM_152763]                                    |
| A_33_P3272291 | 0,020097796                 | down                         | -1,9837346 | AKR1C4      | Homo sapiens aldo-keto reductase family 1, member C4 (AKR1C4), mRNA [NM_001818]                                           |

|               |             |      |            |             |                                                                                                                                            |
|---------------|-------------|------|------------|-------------|--------------------------------------------------------------------------------------------------------------------------------------------|
| A_33_P3392142 | 0,027351584 | down | -1,566315  | AKR1D1      | aldo-keto reductase family 1, member D1 [Source:HGNC Symbol;Acc:HGNC:388] [ENST00000468877]                                                |
| A_24_P218688  | 0,028159836 | down | -1,8972586 | ALDH3B1     | Homo sapiens aldehyde dehydrogenase 3 family, member B1 (ALDH3B1), transcript variant 1, mRNA [NM_000694]                                  |
| A_23_P44867   | 0,03626733  | down | -2,4372706 | AMBN        | Homo sapiens ameloblastin (enamel matrix protein) (AMBN), mRNA [NM_016519]                                                                 |
| A_32_P122226  | 0,046123333 | down | -2,0504458 | AMDHD1      | Homo sapiens amidohydrolase domain containing 1 (AMDHD1), mRNA [NM_152435]                                                                 |
| A_23_P96478   | 1,25E-04    | down | -2,7986672 | AMELX       | Homo sapiens amelogenin, X-linked (AMELX), transcript variant 2, mRNA [NM_182681]                                                          |
| A_33_P3295538 | 0,03661888  | down | -1,7001997 | AMIGO3      | Homo sapiens adhesion molecule with Ig-like domain 3 (AMIGO3), mRNA [NM_198722]                                                            |
| A_23_P31273   | 0,025942856 | down | -2,722401  | AMPH        | Homo sapiens amphiphysin (AMPH), transcript variant 1, mRNA [NM_001635]                                                                    |
| A_23_P216023  | 5,12E-07    | down | -5,139572  | ANGPT1      | Homo sapiens angiopoietin 1 (ANGPT1), transcript variant 1, mRNA [NM_001146]                                                               |
| A_33_P3377703 | 0,039833374 | down | -1,8895715 | ANKRD20A19P | Homo sapiens ankyrin repeat domain 20 family, member A19, pseudogene (ANKRD20A19P), non-coding RNA [NR_073430]                             |
| A_33_P3343457 | 0,005887221 | down | -2,2402024 | ANKRD30B    | Homo sapiens ankyrin repeat domain 30B (ANKRD30B), mRNA [NM_001145029]                                                                     |
| A_24_P917819  | 0,021567624 | up   | 1,7993237  | ANKRD30BP2  | Homo sapiens ankyrin repeat domain 30B pseudogene 2 (ANKRD30BP2), non-coding RNA [NR_026916]                                               |
| A_24_P128713  | 0,024127888 | down | -1,5014349 | ANKRD44     | ankyrin repeat domain 44 [Source:HGNC Symbol;Acc:HGNC:25259] [ENST00000328737]                                                             |
| A_33_P3258004 | 0,043464538 | down | -1,6642784 | ANKS1B      | Homo sapiens ankyrin repeat and sterile alpha motif domain containing 1B (ANKS1B), transcript variant 1, mRNA [NM_152788]                  |
| A_33_P3360296 | 0,035806593 | down | -1,9404445 | ANTXRL      | Homo sapiens anthrax toxin receptor-like (ANTXRL), mRNA [NM_001278688]                                                                     |
| A_21_P0010946 | 0,007583805 | down | -1,7793748 | ANTXRLP1    | Homo sapiens anthrax toxin receptor-like pseudogene 1 (ANTXRLP1), transcript variant 2, non-coding RNA [NR_103828]                         |
| A_21_P0010873 | 0,01194135  | down | -1,8027905 | ANTXRLP1    | Homo sapiens anthrax toxin receptor-like pseudogene 1 (ANTXRLP1), transcript variant 2, non-coding RNA [NR_103828]                         |
| A_23_P145718  | 0,028939143 | down | -1,5836462 | AOAH        | Homo sapiens acyloxyacyl hydrolase (neutrophil) (AOAH), transcript variant 1, mRNA [NM_001637]                                             |
| A_23_P59452   | 0,02375651  | down | -1,6636437 | AOC1        | Homo sapiens amine oxidase, copper containing 1 (AOC1), transcript variant 2, mRNA [NM_001091]                                             |
| A_21_P0000813 | 0,00835472  | down | -1,8337498 | APELA       | Homo sapiens apelin receptor early endogenous ligand (APELA), mRNA [NM_001297550]                                                          |
| A_23_P208302  | 0,006099036 | down | -2,23923   | APOC2       | Homo sapiens apolipoprotein C-II (APOC2), mRNA [NM_000483]                                                                                 |
| A_23_P26522   | 0,018260319 | down | -2,4486797 | AQP8        | Homo sapiens aquaporin 8 (AQP8), mRNA [NM_001169]                                                                                          |
| A_23_P106362  | 0,024555318 | down | -1,551873  | AQP9        | Homo sapiens aquaporin 9 (AQP9), mRNA [NM_020980]                                                                                          |
| A_33_P3279720 | 0,017673923 | down | -1,5726097 | ARFRP1      | ADP-ribosylation factor related protein 1 [Source:HGNC Symbol;Acc:HGNC:662] [ENST00000612772]                                              |
| A_24_P380061  | 0,018220019 | down | -1,526954  | ARHGAP24    | Homo sapiens Rho GTPase activating protein 24 (ARHGAP24), transcript variant 1, mRNA [NM_001025616]                                        |
| A_23_P72968   | 0,017233046 | down | -1,6389556 | ARHGAP36    | Homo sapiens Rho GTPase activating protein 36 (ARHGAP36), transcript variant 1, mRNA [NM_144967]                                           |
| A_33_P3299110 | 0,003256604 | down | -1,678147  | ARHGAP42    | Homo sapiens Rho GTPase activating protein 42 (ARHGAP42), mRNA [NM_152432]                                                                 |
| A_33_P3410385 | 0,004025266 | down | -1,7739966 | ARHGAP44    | Homo sapiens Rho GTPase activating protein 44 (ARHGAP44), mRNA [NM_014859]                                                                 |
| A_33_P3610771 | 0,016006975 | down | -1,5720814 | ARHGEF38    | Homo sapiens Rho guanine nucleotide exchange factor (GEF) 38 (ARHGEF38), transcript variant 1, mRNA [NM_001242729]                         |
| A_33_P3222009 | 0,04425587  | down | -1,9453231 | ARL14EPL    | Homo sapiens ADP-ribosylation factor-like 14 effector protein-like (ARL14EPL), mRNA [NM_001195581]                                         |
| A_23_P86540   | 0,02722762  | down | -1,5565178 | ARMC3       | Homo sapiens armadillo repeat containing 3 (ARMC3), transcript variant 1, mRNA [NM_173081]                                                 |
| A_21_P0013851 | 0,038902566 | down | -1,5179518 | ARMCX4      | Homo sapiens armadillo repeat containing, X-linked 4 (ARMCX4), transcript variant 6, non-coding RNA [NR_045863]                            |
| A_33_P3232334 | 0,03092569  | down | -2,3280091 | ARMCX4      | armadillo repeat containing, X-linked 4 [Source:HGNC Symbol;Acc:HGNC:28615] [ENST00000430461]                                              |
| A_33_P3303785 | 0,011812359 | down | -1,5777488 | ARPP21      | Homo sapiens cAMP-regulated phosphoprotein, 21kDa (ARPP21), transcript variant 4, mRNA [NM_001025069]                                      |
| A_23_P116902  | 0,047357626 | down | -2,4163625 | ART4        | Homo sapiens ADP-ribosyltransferase 4 (Dombrock blood group) (ART4), mRNA [NM_021071]                                                      |
| A_33_P3210622 | 0,005283285 | down | -2,1994066 | ASB13       | Homo sapiens ankyrin repeat and SOCS box containing 13 (ASB13), transcript variant 1, mRNA [NM_024701]                                     |
| A_33_P3290162 | 0,043313116 | down | -1,6179641 | ASB18       | Homo sapiens ankyrin repeat and SOCS box containing 18 (ASB18), mRNA [NM_212556]                                                           |
| A_33_P3264394 | 0,030635294 | down | -1,6542329 | ASPSCR1     | alveolar soft part sarcoma chromosome region, candidate 1 [Source:HGNC Symbol;Acc:HGNC:13825] [ENST00000583693]                            |
| A_33_P3220738 | 0,020830175 | down | -1,9815345 | ASTN1       | Homo sapiens astrotactin 1 (ASTN1), transcript variant 2, mRNA [NM_207108]                                                                 |
| A_33_P3371904 | 8,19E-04    | down | -2,8000426 | ASTN2       | Homo sapiens astrotactin 2 (ASTN2), transcript variant 4, mRNA [NM_198188]                                                                 |
| A_33_P3217258 | 0,015778339 | down | -1,7088526 | ASZ1        | Homo sapiens ankyrin repeat, SAM and basic leucine zipper domain containing 1 (ASZ1), transcript variant 1, mRNA [NM_130768]               |
| A_33_P3708763 | 0,01837297  | down | -2,1448555 | ATP11A-AS1  | Homo sapiens ATP11A antisense RNA 1 (ATP11A-AS1), transcript variant 2, long non-coding RNA [NR_109811]                                    |
| A_33_P3269423 | 0,02057438  | down | -2,9579024 | ATP11AUN    | Homo sapiens ATP11A upstream neighbor (ATP11AUN), mRNA [NM_207440]                                                                         |
| A_33_P3283669 | 0,007015104 | down | -1,7080164 | ATP1A3      | Homo sapiens ATPase, Na <sup>+</sup> /K <sup>+</sup> transporting, alpha 3 polypeptide (ATP1A3), transcript variant 3, mRNA [NM_001256214] |
| A_24_P31275   | 0,009639558 | down | -3,8274825 | ATP1B2      | Homo sapiens ATPase, Na <sup>+</sup> /K <sup>+</sup> transporting, beta 2 polypeptide (ATP1B2), transcript variant 1, mRNA [NM_001678]     |
| A_23_P72462   | 0,044738587 | up   | 1,6080322  | ATP2A1      | Homo sapiens ATPase, Ca <sup>++</sup> transporting, cardiac muscle, fast twitch 1 (ATP2A1), transcript variant b, mRNA [NM_173201]         |
| A_23_P23797   | 0,015121167 | down | -1,8671578 | ATP6V1G3    | Homo sapiens ATPase, H <sup>+</sup> transporting, lysosomal 13kDa, V1 subunit G3 (ATP6V1G3), transcript variant 2, mRNA [NM_133326]        |
| A_23_P163216  | 0,011910637 | down | -1,6608536 | ATP8B4      | Homo sapiens ATPase, class I, type 8B, member 4 (ATP8B4), transcript variant 1, mRNA [NM_024837]                                           |
| A_33_P3343473 | 0,011346163 | down | -1,6308907 | ATRNL1      | Homo sapiens attractin-like 1 (ATRNL1), transcript variant 1, mRNA [NM_207303]                                                             |
| A_33_P3330211 | 0,001019423 | down | -2,4211652 | AUTS2       | Homo sapiens autism susceptibility candidate 2 (AUTS2), transcript variant 3, mRNA [NM_001127232]                                          |

|                |             |      |            |              |                                                                                                                               |
|----------------|-------------|------|------------|--------------|-------------------------------------------------------------------------------------------------------------------------------|
| A_23_P148015   | 0,011985207 | down | -2,3226242 | AXIN2        | Homo sapiens axin 2 (AXIN2), mRNA [NM_004655]                                                                                 |
| A_33_P3279353  | 0,03582275  | down | -1,6726085 | AZU1         | Homo sapiens azurocidin 1 (AZU1), mRNA [NM_001700]                                                                            |
| A_33_P3286958  | 0,016257666 | down | -2,0075836 | B3GALT2      | Homo sapiens UDP-Gal:betaGlcNAc beta 1,3-galactosyltransferase, polypeptide 2 (B3GALT2), mRNA [NM_003783]                     |
| A_23_P39755    | 0,001524212 | down | -2,2593756 | B3GNT7       | Homo sapiens UDP-GlcNAc:betaGal beta-1,3-N-acetylglucosaminyltransferase 7 (B3GNT7), mRNA [NM_145236]                         |
| A_21_P0011660  | 0,020721408 | down | -1,6141876 | B4GALT6      | PREDICTED: Homo sapiens UDP-Gal:betaGlcNAc beta 1,4- galactosyltransferase, polypeptide 6 (B4GALT6), transcript variant X1, m |
| A_21_P0006033  | 0,039523117 | down | -1,5338823 | BARX1-AS1    | BARX1 antisense RNA 1 (head to head) [Source:HGNC Symbol;Acc:HGNC:50673] [ENST00000453045]                                    |
| A_23_P212050   | 0,035425033 | down | -1,6021214 | BCHE         | Homo sapiens butyrylcholinesterase (BCHE), mRNA [NM_000055]                                                                   |
| A_21_P0014929  | 0,011775185 | up   | 2,0829556  | BCR          | Homo sapiens breakpoint cluster region (BCR), transcript variant 1, mRNA [NM_004327]                                          |
| A_23_P79769    | 0,004277087 | down | -2,0157063 | BIRC7        | Homo sapiens baculoviral IAP repeat containing 7 (BIRC7), transcript variant 2, mRNA [NM_022161]                              |
| A_23_P154643   | 0,007747203 | down | -2,342536  | BMP7         | Homo sapiens bone morphogenetic protein 7 (BMP7), mRNA [NM_001719]                                                            |
| A_33_P3285195  | 0,003501021 | down | -1,6852245 | BMPR1B-AS1   | Homo sapiens BMPR1B antisense RNA 1 (head to head) (BMPR1B-AS1), long non-coding RNA [NR_121610]                              |
| A_32_P133916   | 0,042214923 | down | -1,8151916 | BNC2         | Homo sapiens basonuclin 2 (BNC2), mRNA [NM_017637]                                                                            |
| A_23_P43684    | 0,006747896 | down | -1,8317413 | BNC2         | Homo sapiens basonuclin 2 (BNC2), mRNA [NM_017637]                                                                            |
| A_23_P102083   | 0,027096966 | down | -1,5181345 | BOLL         | Homo sapiens boule-like RNA-binding protein (BOLL), transcript variant 2, mRNA [NM_033030]                                    |
| A_23_P254558   | 0,03405087  | down | -1,7469546 | BPESC1       | Homo sapiens blepharophimosis, epicanthus inversus and ptosis, candidate 1 (non-protein coding) (BPESC1), long non-coding RN/ |
| A_19_P00321575 | 0,021109326 | down | -2,1044424 | BPESC1       | Homo sapiens blepharophimosis, epicanthus inversus and ptosis, candidate 1 (non-protein coding) (BPESC1), long non-coding RN/ |
| A_23_P57222    | 0,018512258 | down | -2,3026552 | BPIFB3       | BPI fold containing family B, member 3 [Source:HGNC Symbol;Acc:HGNC:16178] [ENST00000375494]                                  |
| A_32_P539109   | 0,009570602 | down | -1,9971515 | BPIFB6       | Homo sapiens BPI fold containing family B, member 6 (BPIFB6), mRNA [NM_174897]                                                |
| A_23_P45598    | 0,04977297  | down | -2,075018  | BPY2B        | Homo sapiens basic charge, Y-linked, 2B (BPY2B), mRNA [NM_001002760]                                                          |
| A_23_P94517    | 0,049273077 | down | -2,1822615 | BRINP1       | Homo sapiens bone morphogenetic protein/retinoic acid inducible neural-specific 1 (BRINP1), mRNA [NM_014618]                  |
| A_33_P3391915  | 0,041581843 | down | -1,6054517 | BTBD17       | Homo sapiens BTB (POZ) domain containing 17 (BTBD17), mRNA [NM_001080466]                                                     |
| A_33_P3301266  | 0,019472696 | down | -1,9919575 | BTNL8        | Homo sapiens butyrophilin-like 8 (BTNL8), transcript variant 4, mRNA [NM_001159708]                                           |
| A_33_P3246198  | 0,04825811  | down | -1,5400901 | C10orf120    | Homo sapiens chromosome 10 open reading frame 120 (C10orf120), mRNA [NM_001010912]                                            |
| A_23_P325700   | 0,023371512 | down | -1,8746072 | C10orf126    | Homo sapiens chromosome 10 open reading frame 126 (C10orf126), mRNA [NM_001278522]                                            |
| A_24_P333635   | 0,028001955 | down | -1,6796358 | C10orf62     | Homo sapiens chromosome 10 open reading frame 62 (C10orf62), mRNA [NM_001009997]                                              |
| A_32_P337442   | 0,04366835  | down | -1,8383653 | C10orf67     | Homo sapiens chromosome 10 open reading frame 67 (C10orf67), mRNA [NM_153714]                                                 |
| A_21_P0006760  | 0,024898514 | down | -1,8521272 | C10orf71-AS1 | Homo sapiens C10orf71 antisense RNA 1 (C10orf71-AS1), long non-coding RNA [NR_108038]                                         |
| A_33_P3366659  | 0,01611085  | down | -1,631607  | C12orf54     | chromosome 12 open reading frame 54 [Source:HGNC Symbol;Acc:HGNC:28553] [ENST00000380491]                                     |
| A_32_P741217   | 0,0328319   | down | -1,5199456 | C14orf177    | Homo sapiens chromosome 14 open reading frame 177 (C14orf177), mRNA [NM_182560]                                               |
| A_23_P372356   | 0,00120783  | down | -2,9739976 | C15orf32     | Homo sapiens chromosome 15 open reading frame 32 (C15orf32), transcript variant 1, mRNA [NM_153040]                           |
| A_23_P325593   | 0,027028698 | down | -1,5072515 | C15orf43     | Homo sapiens chromosome 15 open reading frame 43 (C15orf43), mRNA [NM_152448]                                                 |
| A_23_P26024    | 0,048014753 | up   | 1,5385834  | C15orf48     | Homo sapiens chromosome 15 open reading frame 48 (C15orf48), transcript variant 2, mRNA [NM_032413]                           |
| A_33_P3390017  | 0,024789764 | down | -2,0008724 | C15orf54     | Homo sapiens chromosome 15 open reading frame 54 (C15orf54), transcript variant 1, mRNA [NM_207445]                           |
| A_21_P0008831  | 0,017732698 | down | -1,634158  | C15orf59-AS1 |                                                                                                                               |
| A_33_P3417840  | 0,028465047 | down | -1,5116956 | C16orf47     | Homo sapiens chromosome 16 open reading frame 47 (C16orf47), mRNA [NM_207385]                                                 |
| A_33_P3405193  | 0,046060669 | down | -1,7128793 | C16orf72     | Homo sapiens PRO0149 protein, mRNA (cDNA clone IMAGE:5172419), containing frame-shift errors. [BC029878]                      |
| A_33_P3417980  | 7,39E-04    | down | -3,3118792 | C16orf86     | chromosome 16 open reading frame 86 [Source:HGNC Symbol;Acc:HGNC:33755] [ENST00000459925]                                     |
| A_21_P0009030  | 0,01749081  | down | -1,5929195 | C16orf97     | Homo sapiens chromosome 16 open reading frame 97 (C16orf97), mRNA [NM_001242473]                                              |
| A_33_P3339187  | 0,025300113 | down | -2,837693  | C17orf112    | Homo sapiens chromosome 17 open reading frame 112 (C17orf112), mRNA [NM_001243552]                                            |
| A_23_P335388   | 0,047291175 | up   | 1,72744    | C17orf78     | Homo sapiens chromosome 17 open reading frame 78 (C17orf78), mRNA [NM_173625]                                                 |
| A_23_P50052    | 0,011242777 | down | -1,5241826 | C18orf12     | PREDICTED: Homo sapiens chromosome 18 open reading frame 12 (C18orf12), misc_RNA [XR_109479]                                  |
| A_33_P3411945  | 0,014121277 | down | -1,8479769 | C19orf38     | Homo sapiens chromosome 19 open reading frame 38 (C19orf38), mRNA [NM_001136482]                                              |
| A_32_P8925     | 0,019899461 | down | -1,9492047 | C1orf100     | Homo sapiens chromosome 1 open reading frame 100 (C1orf100), transcript variant 1, mRNA [NM_001012970]                        |
| A_32_P114746   | 0,025109492 | down | -2,0821435 | C1orf111     | Homo sapiens chromosome 1 open reading frame 111 (C1orf111), mRNA [NM_182581]                                                 |
| A_33_P3340055  | 0,021914668 | down | -2,376796  | C1orf167     | Homo sapiens chromosome 1 open reading frame 167 (C1orf167), mRNA [NM_001010881]                                              |
| A_24_P94319    | 0,015115822 | down | -1,7896101 | C1orf177     | Homo sapiens chromosome 1 open reading frame 177 (C1orf177), transcript variant 1, mRNA [NM_152607]                           |
| A_33_P3403560  | 0,029438203 | down | -1,650747  | C1orf185     | Homo sapiens chromosome 1 open reading frame 185 (C1orf185), mRNA [NM_001136508]                                              |
| A_32_P174693   | 0,047867108 | down | -1,8569555 | C1orf234     | Homo sapiens chromosome 1 open reading frame 234 (C1orf234), mRNA [NM_001242521]                                              |
| A_21_P0014079  | 0,005703502 | down | -2,444142  | C1orf61      | chromosome 1 open reading frame 61 [Source:HGNC Symbol;Acc:HGNC:30780] [ENST00000476966]                                      |

|               |             |      |            |             |                                                                                                                              |
|---------------|-------------|------|------------|-------------|------------------------------------------------------------------------------------------------------------------------------|
| A_23_P376172  | 0,015287323 | down | -1,6985577 | C1orf64     | Homo sapiens chromosome 1 open reading frame 64 (C1orf64), mRNA [NM_178840]                                                  |
| A_23_P137366  | 0,039651893 | down | -2,7504945 | C1QB        | Homo sapiens complement component 1, q subcomponent, B chain (C1QB), mRNA [NM_000491]                                        |
| A_33_P3357007 | 0,049568493 | down | -2,1569262 | C1QTNF9B    | Homo sapiens C1q and tumor necrosis factor related protein 9B (C1QTNF9B), transcript variant 1, mRNA [NM_001007537]          |
| A_32_P162187  | 0,012271603 | down | -1,7030604 | C2          | Homo sapiens complement component 2 (C2), transcript variant 1, mRNA [NM_000063]                                             |
| A_33_P3419831 | 0,04683434  | down | -2,1296825 | C20orf62    | chromosome 20 open reading frame 62 [Source:HGNC Symbol;Acc:HGNC:16195] [ENST00000306731]                                    |
| A_32_P45974   | 0,0219923   | down | -1,7609603 | C2orf27A    | Homo sapiens chromosome 2 open reading frame 27, mRNA (cDNA clone IMAGE:6426166). [BC071972]                                 |
| A_33_P3286372 | 0,010050143 | down | -1,9285448 | C2orf48     | Homo sapiens chromosome 2 open reading frame 48 (C2orf48), mRNA [NM_182626]                                                  |
| A_33_P3398998 | 0,033948105 | down | -1,7033397 | C2orf50     | Homo sapiens chromosome 2 open reading frame 50 (C2orf50), mRNA [NM_182500]                                                  |
| A_33_P3265714 | 0,0170712   | down | -1,9917232 | C2orf61     | Homo sapiens chromosome 2 open reading frame 61 (C2orf61), transcript variant 2, mRNA [NM_173649]                            |
| A_33_P3237207 | 0,022091318 | down | -2,4677203 | C2orf72     | Homo sapiens chromosome 2 open reading frame 72 (C2orf72), mRNA [NM_001144994]                                               |
| A_33_P3351836 | 0,00362833  | down | -1,8438387 | C2orf73     | chromosome 2 open reading frame 73 [Source:HGNC Symbol;Acc:HGNC:26861] [ENST00000414747]                                     |
| A_23_P17130   | 0,007990896 | down | -1,6558765 | C2orf88     | Homo sapiens chromosome 2 open reading frame 88 (C2orf88), transcript variant 1, mRNA [NM_001042519]                         |
| A_33_P3416682 | 0,005636004 | down | -1,8367797 | C2orf91     | Homo sapiens chromosome 2 open reading frame 91 (C2orf91), mRNA [NM_001242815]                                               |
| A_23_P2431    | 7,59E-04    | down | -1,9494691 | C3AR1       | Homo sapiens complement component 3a receptor 1 (C3AR1), mRNA [NM_004054]                                                    |
| A_33_P3254811 | 0,004196629 | down | -3,2643504 | C3orf70     | Homo sapiens chromosome 3 open reading frame 70 (C3orf70), mRNA [NM_001025266]                                               |
| A_33_P3262351 | 0,048966765 | down | -3,2656286 | C5orf49     | Homo sapiens chromosome 5 open reading frame 49 (C5orf49), mRNA [NM_001089584]                                               |
| A_33_P3660204 | 0,04424352  | down | -1,5158918 | C5orf66-AS2 | Homo sapiens C5orf66 antisense RNA 2 (C5orf66-AS2), long non-coding RNA [NR_037895]                                          |
| A_32_P85106   | 0,039613202 | down | -1,7143147 | C6orf118    | Homo sapiens chromosome 6 open reading frame 118 (C6orf118), mRNA [NM_144980]                                                |
| A_33_P3219755 | 0,04777795  | down | -1,9811188 | C6orf132    | Homo sapiens chromosome 6 open reading frame 132 (C6orf132), mRNA [NM_001164446]                                             |
| A_23_P421054  | 0,016666127 | down | -1,9419198 | C6orf165    | Homo sapiens chromosome 6 open reading frame 165 (C6orf165), mRNA [NM_001031743]                                             |
| A_24_P350303  | 0,029164936 | down | -1,5414382 | C6orf201    | Homo sapiens chromosome 6 open reading frame 201 (C6orf201), transcript variant 1, mRNA [NM_001085401]                       |
| A_21_P0013066 | 0,02202922  | down | -1,5280143 | C6orf229    | Homo sapiens chromosome 6 open reading frame 229 (C6orf229), mRNA [NM_001282492]                                             |
| A_23_P213857  | 0,002862326 | down | -2,2796526 | C7          | Homo sapiens complement component 7 (C7), mRNA [NM_000587]                                                                   |
| A_33_P3405349 | 2,05E-04    | down | -2,122237  | C7orf43     | chromosome 7 open reading frame 43 [Source:HGNC Symbol;Acc:HGNC:25604] [ENST00000448720]                                     |
| A_33_P3401397 | 0,010773891 | down | -2,5494263 | C7orf65     | Homo sapiens chromosome 7 open reading frame 65 (C7orf65), mRNA [NM_001123065]                                               |
| A_33_P3396776 | 0,04445598  | down | -1,5308366 | C7orf66     | Homo sapiens chromosome 7 open reading frame 66 (C7orf66), mRNA [NM_001024607]                                               |
| A_33_P3401003 | 0,005982795 | down | -1,7286302 | C7orf71     | Homo sapiens chromosome 7 open reading frame 71 (C7orf71), transcript variant 1, mRNA [NM_001145531]                         |
| A_33_P3213508 | 0,014024264 | down | -1,8523142 | C7orf72     | Homo sapiens chromosome 7 open reading frame 72 (C7orf72), mRNA [NM_001161834]                                               |
| A_33_P3423854 | 0,02162742  | down | -1,5803097 | C8B         | Homo sapiens complement component 8, beta polypeptide (C8B), transcript variant 2, mRNA [NM_001278543]                       |
| A_33_P3253169 | 0,01887733  | down | -2,5076232 | C8orf86     | chromosome 8 open reading frame 86 [Source:HGNC Symbol;Acc:HGNC:33774] [ENST00000358138]                                     |
| A_33_P3287997 | 0,016095273 | down | -1,9255505 | C9orf106    | Homo sapiens chromosome 9 open reading frame 106 (C9orf106), mRNA [NM_001012715]                                             |
| A_32_P48949   | 0,043982014 | down | -2,0104003 | C9orf129    | Homo sapiens chromosome 9 open reading frame 129 (C9orf129), mRNA [NM_001098808]                                             |
| A_33_P3257703 | 0,017793648 | down | -1,6179146 | C9orf131    | Homo sapiens chromosome 9 open reading frame 131 (C9orf131), transcript variant 1, mRNA [NM_203299]                          |
| A_33_P3328270 | 0,025886964 | down | -1,8010575 | C9orf172    | Homo sapiens chromosome 9 open reading frame 172 (C9orf172), mRNA [NM_001080482]                                             |
| A_33_P3353662 | 0,016242668 | down | -1,5686653 | C9orf66     | Homo sapiens chromosome 9 open reading frame 66 (C9orf66), mRNA [NM_152569]                                                  |
| A_32_P65706   | 0,004236935 | down | -2,0669386 | C9orf92     | Homo sapiens chromosome 9 open reading frame 92 (C9orf92), transcript variant 1, mRNA [NM_001271829]                         |
| A_23_P4096    | 0,011749357 | down | -2,2866106 | CA4         | Homo sapiens carbonic anhydrase IV (CA4), mRNA [NM_000717]                                                                   |
| A_24_P241057  | 0,037146978 | down | -1,8314955 | CABP2       | Homo sapiens calcium binding protein 2 (CABP2), mRNA [NM_016366]                                                             |
| A_23_P308021  | 0,002962897 | down | -2,41373   | CABP4       | Homo sapiens calcium binding protein 4 (CABP4), transcript variant 1, mRNA [NM_145200]                                       |
| A_33_P3280106 | 0,033068944 | down | -3,169259  | CACNA1B     | Homo sapiens calcium channel, voltage-dependent, N type, alpha 1B subunit (CACNA1B), transcript variant 2, mRNA [NM_0012438] |
| A_23_P373031  | 9,21E-04    | down | -2,0299516 | CACNA1C     | Homo sapiens calcium channel, voltage-dependent, L type, alpha 1C subunit (CACNA1C), transcript variant 18, mRNA [NM_000719] |
| A_24_P945096  | 0,048186537 | down | -1,8050053 | CACNA1I     | Homo sapiens calcium channel, voltage-dependent, T type, alpha 1I subunit (CACNA1I), transcript variant 1, mRNA [NM_021096]  |
| A_33_P3285275 | 0,042075284 | down | -1,8045393 | CACNB2      | calcium channel, voltage-dependent, beta 2 subunit [Source:HGNC Symbol;Acc:HGNC:1402] [ENST00000498816]                      |
| A_33_P3211138 | 0,012632152 | down | -2,2383876 | CADM1       | cell adhesion molecule 1 [Source:HGNC Symbol;Acc:HGNC:5951] [ENST00000452722]                                                |
| A_33_P3261957 | 0,04173563  | down | -1,9484638 | CALCRL      | Homo sapiens calcitonin receptor-like (CALCRL), transcript variant 1, mRNA [NM_005795]                                       |
| A_32_P812268  | 0,004539526 | down | -1,9035704 | CALHM1      | Homo sapiens calcium homeostasis modulator 1 (CALHM1), mRNA [NM_001001412]                                                   |
| A_24_P380567  | 0,010855469 | down | -1,745703  | CALN1       | Homo sapiens calneuron 1 (CALN1), transcript variant 1, mRNA [NM_031468]                                                     |
| A_23_P42882   | 0,011911688 | down | -2,0619926 | CAMK2B      | Homo sapiens calcium/calmodulin-dependent protein kinase II beta (CAMK2B), transcript variant 6, mRNA [NM_172082]            |
| A_23_P380379  | 0,022989657 | down | -1,935372  | CAPS2       | Homo sapiens calyphosine 2 (CAPS2), transcript variant 3, mRNA [NM_001286548]                                                |

|               |                  |                      |                                                                                                                                   |
|---------------|------------------|----------------------|-----------------------------------------------------------------------------------------------------------------------------------|
| A_33_P3235561 | 0,007799513 up   | 1,6712301 CAPZB      | Homo sapiens capping protein (actin filament) muscle Z-line, beta (CAPZB), transcript variant 3, mRNA [NM_001206541]              |
| A_32_P800179  | 0,048436232 down | -1,76493 CARD8       | caspase recruitment domain family, member 8 [Source:HGNC Symbol;Acc:HGNC:17057] [ENST00000600800]                                 |
| A_21_P0005629 | 0,012144235 down | -1,8824894 CASC11    | cancer susceptibility candidate 11 (non-protein coding) [Source:HGNC Symbol;Acc:HGNC:48939] [ENST00000502463]                     |
| A_21_P0009156 | 0,007579134 down | -2,095656 CASC17     | Homo sapiens cancer susceptibility candidate 17 (non-protein coding) (CASC17), long non-coding RNA [NR_104152]                    |
| A_32_P61480   | 0,043837786 down | -1,5960506 CASC2     | Homo sapiens cancer susceptibility candidate 2 (non-protein coding) (CASC2), transcript variant 3, long non-coding RNA [NR_02694] |
| A_33_P3213362 | 0,005872226 down | -2,9656525 CASC2     | Homo sapiens cancer susceptibility candidate 2 (non-protein coding) (CASC2), transcript variant 1, long non-coding RNA [NR_02694] |
| A_21_P0009099 | 0,04300558 down  | -1,5513371 CASC22    | PREDICTED: Homo sapiens uncharacterized LOC283854 (LOC283854), misc_RNA [XR_243451]                                               |
| A_23_P173     | 0,003097629 down | -3,1827426 CASQ1     | Homo sapiens calsequestrin 1 (fast-twitch, skeletal muscle) (CASQ1), mRNA [NM_001231]                                             |
| A_33_P3280646 | 0,006615657 down | -2,2763705 CASR      | Homo sapiens calcium-sensing receptor (CASR), transcript variant 1, mRNA [NM_001178065]                                           |
| A_23_P29830   | 0,004990423 up   | 1,5528276 CBLB       | Homo sapiens Cbl proto-oncogene B, E3 ubiquitin protein ligase (CBLB), mRNA [NM_170662]                                           |
| A_33_P3343845 | 0,02144335 down  | -1,6561091 CBX7      | Homo sapiens chromobox homolog 7 (CBX7), mRNA [NM_175709]                                                                         |
| A_33_P3308686 | 0,036245164 down | -2,0938563 CC2D2A    | Homo sapiens coiled-coil and C2 domain containing 2A (CC2D2A), transcript variant 2, mRNA [NM_020785]                             |
| A_33_P3261586 | 0,039363004 down | -1,5912447 CCDC108   | Homo sapiens coiled-coil domain containing 108 (CCDC108), transcript variant 1, mRNA [NM_194302]                                  |
| A_33_P3246528 | 0,031469293 down | -1,9446043 CCDC114   | Homo sapiens coiled-coil domain containing 114 (CCDC114), mRNA [NM_144577]                                                        |
| A_23_P429478  | 0,010966522 down | -1,6122632 CCDC140   | Homo sapiens coiled-coil domain containing 140 (CCDC140), mRNA [NM_153038]                                                        |
| A_33_P3356230 | 0,03703113 down  | -1,7634814 CCDC144NL | Homo sapiens coiled-coil domain containing 144 family, N-terminal like (CCDC144NL), mRNA [NM_001004306]                           |
| A_33_P3238032 | 0,020225203 down | -2,2519588 CCDC158   | Homo sapiens coiled-coil domain containing 158 (CCDC158), mRNA [NM_001042784]                                                     |
| A_33_P3307008 | 0,021656247 down | -2,4400527 CCDC168   | Homo sapiens coiled-coil domain containing 168 (CCDC168), mRNA [NM_001146197]                                                     |
| A_21_P0006341 | 0,005785806 down | -1,8723024 CCDC171   | coiled-coil domain containing 171 [Source:HGNC Symbol;Acc:HGNC:29828] [ENST00000478913]                                           |
| A_33_P3250865 | 0,040881567 down | -1,7019154 CCDC175   | coiled-coil domain containing 175 [Source:HGNC Symbol;Acc:HGNC:19847] [ENST00000281581]                                           |
| A_23_P468     | 0,014091959 down | -2,2289956 CCDC181   | Homo sapiens coiled-coil domain containing 181 (CCDC181), transcript variant 2, mRNA [NM_021179]                                  |
| A_23_P344194  | 0,007684334 down | -2,0479565 CCDC184   | Homo sapiens coiled-coil domain containing 184 (CCDC184), mRNA [NM_001013635]                                                     |
| A_33_P3328726 | 0,015948333 down | -1,8559755 CCDC33    | Homo sapiens coiled-coil domain containing 33 (CCDC33), transcript variant 1, mRNA [NM_025055]                                    |
| A_23_P345175  | 0,033578776 down | -1,7061088 CCDC63    | Homo sapiens coiled-coil domain containing 63 (CCDC63), transcript variant 1, mRNA [NM_152591]                                    |
| A_23_P356667  | 0,033996154 down | -1,782858 CCDC83     | Homo sapiens coiled-coil domain containing 83 (CCDC83), transcript variant 1, mRNA [NM_173556]                                    |
| A_24_P192988  | 0,009657311 down | -1,5435047 CCDC89    | coiled-coil domain containing 89 [Source:HGNC Symbol;Acc:HGNC:26762] [ENST00000316398]                                            |
| A_23_P49759   | 0,040338464 down | -2,415574 CCL1       | Homo sapiens chemokine (C-C motif) ligand 1 (CCL1), mRNA [NM_002981]                                                              |
| A_33_P3324004 | 0,016746009 down | -1,8994434 CCL15     | Homo sapiens chemokine (C-C motif) ligand 15 (CCL15), mRNA [NM_032965]                                                            |
| A_33_P3285945 | 1,15E-05 down    | -3,4042187 CCL21     | Homo sapiens chemokine (C-C motif) ligand 21 (CCL21), mRNA [NM_002989]                                                            |
| A_24_P97405   | 0,041068777 down | -1,8425514 CCRL2     | Homo sapiens chemokine (C-C motif) receptor-like 2 (CCRL2), transcript variant 1, mRNA [NM_003965]                                |
| A_33_P3343360 | 0,002519094 down | -2,087378 CCSE1      | Homo sapiens coiled-coil serine-rich protein 1 (CCSE1), transcript variant 2, mRNA [NM_207491]                                    |
| A_23_P310410  | 0,018581918 down | -1,6482953 CD1E      | Homo sapiens CD1e molecule (CD1E), transcript variant 2, mRNA [NM_001042583]                                                      |
| A_33_P3278013 | 0,033897545 down | -2,0211592 CD2       | CD2 molecule [Source:HGNC Symbol;Acc:HGNC:1639] [ENST00000369477]                                                                 |
| A_23_P121480  | 0,02160561 up    | 1,6621829 CD200      | Homo sapiens CD200 molecule (CD200), transcript variant 2, mRNA [NM_001004196]                                                    |
| A_24_P186539  | 0,035061605 down | -1,8416742 CD209     | Homo sapiens CD209 molecule (CD209), transcript variant 1, mRNA [NM_021155]                                                       |
| A_23_P209055  | 0,03686409 down  | -1,6131264 CD22      | Homo sapiens CD22 molecule (CD22), transcript variant 1, mRNA [NM_001771]                                                         |
| A_33_P3413558 | 0,034264807 down | -2,0173213 CD226     | CD226 molecule [Source:HGNC Symbol;Acc:HGNC:16961] [ENST00000280200]                                                              |
| A_23_P85453   | 0,00486417 down  | -3,3950548 CD244     | Homo sapiens CD244 molecule, natural killer cell receptor 2B4 (CD244), transcript variant 1, mRNA [NM_016382]                     |
| A_23_P23829   | 0,006846983 down | -2,085793 CD34       | Homo sapiens CD34 molecule (CD34), transcript variant 2, mRNA [NM_001773]                                                         |
| A_33_P3225046 | 0,034216184 down | -2,5512295 CD34      | Homo sapiens CD34 molecule (CD34), transcript variant 1, mRNA [NM_001025109]                                                      |
| A_33_P3375541 | 0,001329882 down | -2,4598093 CD3D      | Homo sapiens CD3d molecule, delta (CD3-TCR complex) (CD3D), transcript variant 1, mRNA [NM_000732]                                |
| A_33_P3241021 | 0,01925859 down  | -2,1987698 CD69      | CD69 molecule [Source:HGNC Symbol;Acc:HGNC:1694] [ENST00000416624]                                                                |
| A_24_P320033  | 0,04820995 down  | -2,115845 CD80       | Homo sapiens CD80 molecule (CD80), mRNA [NM_005191]                                                                               |
| A_33_P3228837 | 0,007806487 down | -1,7269272 CD8A      | Homo sapiens CD8a molecule (CD8A), transcript variant 3, mRNA [NM_001145873]                                                      |
| A_32_P56001   | 0,025102844 down | -1,6389058 CD93      | Homo sapiens CD93 molecule (CD93), mRNA [NM_012072]                                                                               |
| A_23_P374281  | 0,02590909 down  | -1,5849372 CDC20B    | Homo sapiens cell division cycle 20B (CDC20B), transcript variant 1, mRNA [NM_152623]                                             |
| A_33_P3397383 | 0,002665454 down | -2,147482 CDC20B     | cell division cycle 20B [Source:HGNC Symbol;Acc:HGNC:24222] [ENST00000507931]                                                     |
| A_21_P0004295 | 0,045147456 down | -1,9102632 CDC42SE2  | CDC42 small effector 2 [Source:HGNC Symbol;Acc:HGNC:18547] [ENST00000515533]                                                      |
| A_23_P55586   | 0,023311725 down | -1,5579506 CDH20     | Homo sapiens cadherin 20, type 2 (CDH20), mRNA [NM_031891]                                                                        |

|               |             |      |            |            |                                                                                                                            |
|---------------|-------------|------|------------|------------|----------------------------------------------------------------------------------------------------------------------------|
| A_23_P92999   | 0,014992202 | down | -3,3550658 | CDH9       | Homo sapiens cadherin 9, type 2 (T1-cadherin) (CDH9), mRNA [NM_016279]                                                     |
| A_24_P51683   | 0,014340207 | down | -2,7784083 | CDK5R2     | Homo sapiens cyclin-dependent kinase 5, regulatory subunit 2 (p39) (CDK5R2), mRNA [NM_003936]                              |
| A_23_P30294   | 0,028361538 | down | -1,5275115 | CDO1       | Homo sapiens cysteine dioxygenase type 1 (CDO1), mRNA [NM_001801]                                                          |
| A_33_P3796201 | 0,018720688 | down | -2,0009687 | CDRT7      | Homo sapiens CMT1A duplicated region transcript 7 (non-protein coding) (CDRT7), long non-coding RNA [NR_033371]            |
| A_33_P3249818 | 0,001202056 | down | -2,4600298 | CEACAM18   | Homo sapiens carcinoembryonic antigen-related cell adhesion molecule 18 (CEACAM18), mRNA [NM_001278392]                    |
| A_23_P78526   | 0,009063659 | down | -1,841083  | CEACAM19   | Homo sapiens carcinoembryonic antigen-related cell adhesion molecule 19 (CEACAM19), transcript variant 2, mRNA [NM_020219] |
| A_21_P0011782 | 0,03170947  | down | -1,6683136 | CEACAM22P  | carcinoembryonic antigen-related cell adhesion molecule 2, pseudogene [Source:HGNC Symbol;Acc:HGNC:38029] [ENST00000045]   |
| A_33_P3265309 | 0,02638436  | down | -1,6588292 | CEACAM4    | Homo sapiens carcinoembryonic antigen-related cell adhesion molecule 4 (CEACAM4), mRNA [NM_001817]                         |
| A_23_P211326  | 0,010494229 | down | -2,0310352 | CECR2      | Homo sapiens cat eye syndrome chromosome region, candidate 2 (CECR2), transcript variant 1, mRNA [NM_001290047]            |
| A_21_P0012243 | 0,006165844 | down | -1,599026  | CECR7      | cat eye syndrome chromosome region, candidate 7 (non-protein coding) [Source:HGNC Symbol;Acc:HGNC:1845] [ENST000006099]    |
| A_33_P3313810 | 0,042647574 | down | -1,7413269 | CELA1      | Homo sapiens chymotrypsin-like elastase family, member 1 (CELA1), mRNA [NM_001971]                                         |
| A_33_P3376872 | 0,008131525 | down | -1,5721785 | CELA3B     | Homo sapiens chymotrypsin-like elastase family, member 3B (CELA3B), mRNA [NM_007352]                                       |
| A_21_P0012348 | 0,030732593 | down | -1,6901684 | CES5A      | Homo sapiens carboxylesterase 5A (CES5A), transcript variant 2, mRNA [NM_145024]                                           |
| A_33_P3276303 | 0,039331276 | down | -1,872592  | CES5AP1    | Homo sapiens carboxylesterase 5A pseudogene 1 (CES5AP1), non-coding RNA [NR_037839]                                        |
| A_23_P4074    | 0,01197975  | down | -1,9024229 | CFAP52     | Homo sapiens cilia and flagella associated protein 52 (CFAP52), transcript variant 2, mRNA [NM_145054]                     |
| A_33_P3336262 | 0,025655484 | down | -2,3982623 | CFAP74     | cilia and flagella associated protein 74 [Source:HGNC Symbol;Acc:HGNC:29368] [ENST00000412120]                             |
| A_24_P111406  | 0,04216407  | down | -1,5375454 | CFHR5      | Homo sapiens complement factor H-related 5 (CFHR5), mRNA [NM_030787]                                                       |
| A_23_P46894   | 0,007760174 | down | -2,4157164 | CHAT       | Homo sapiens choline O-acetyltransferase (CHAT), transcript variant M, mRNA [NM_020549]                                    |
| A_21_P0013981 | 0,02963747  | down | -1,7642552 | CHRM3      | cholinergic receptor, muscarinic 3 [Source:HGNC Symbol;Acc:HGNC:1952] [ENST00000481779]                                    |
| A_33_P3215635 | 0,014044057 | down | -1,6950067 | CHRNB2     | Homo sapiens cholinergic receptor, nicotinic, beta 2 (neuronal) (CHRNB2), mRNA [NM_000748]                                 |
| A_23_P123424  | 0,03585705  | down | -1,8078041 | CHRNB3     | Homo sapiens cholinergic receptor, nicotinic, beta 3 (neuronal) (CHRNB3), mRNA [NM_000749]                                 |
| A_21_P0007879 | 0,040652055 | down | -1,5503924 | CISTR      | Homo sapiens chondrogenesis-associated transcript (CISTR), transcript variant 1, long non-coding RNA [NR_104332]           |
| A_23_P101683  | 0,044061646 | down | -1,7502303 | CLC        | Homo sapiens Charcot-Leyden crystal galectin (CLC), mRNA [NM_001828]                                                       |
| A_23_P59772   | 0,002632682 | down | -2,0110087 | CLCN1      | Homo sapiens chloride channel, voltage-sensitive 1 (CLCN1), transcript variant 1, mRNA [NM_000083]                         |
| A_33_P3218089 | 0,012613019 | down | -2,398188  | CLDN24     | Homo sapiens claudin 24 (CLDN24), mRNA [NM_001185149]                                                                      |
| A_23_P37942   | 0,006116098 | down | -2,4962442 | CLDN6      | Homo sapiens claudin 6 (CLDN6), mRNA [NM_021195]                                                                           |
| A_33_P3303519 | 0,011558063 | down | -2,6391098 | CLEC12B    | Homo sapiens C-type lectin domain family 12, member B (CLEC12B), transcript variant 2, mRNA [NM_205852]                    |
| A_33_P3332955 | 0,021471735 | down | -2,0002813 | CLEC1B     | Homo sapiens C-type lectin domain family 1, member B (CLEC1B), transcript variant 1, mRNA [NM_016509]                      |
| A_33_P3295348 | 0,022303764 | down | -1,8181782 | CLEC2A     | Homo sapiens C-type lectin domain family 2, member A (CLEC2A), transcript variant 1, mRNA [NM_001130711]                   |
| A_23_P42931   | 0,04913469  | down | -2,0257864 | CLEC2L     | Homo sapiens C-type lectin domain family 2, member L (CLEC2L), mRNA [NM_001080511]                                         |
| A_24_P227415  | 0,020447036 | down | -1,5718691 | CLEC7A     | Homo sapiens C-type lectin domain family 7, member A (CLEC7A), transcript variant 6, mRNA [NM_197954]                      |
| A_23_P321984  | 0,026650889 | down | -1,8684766 | CLECL1     | Homo sapiens C-type lectin-like 1 (CLECL1), transcript variant 1, mRNA [NM_172004]                                         |
| A_23_P311895  | 0,015129729 | down | -1,6527369 | CLIC5      | Homo sapiens chloride intracellular channel 5 (CLIC5), transcript variant 2, mRNA [NM_016929]                              |
| A_23_P364567  | 0,036356688 | down | -2,1880867 | CLRN1      | Homo sapiens clarin 1 (CLRN1), transcript variant 4, mRNA [NM_052995]                                                      |
| A_33_P3236077 | 0,018208487 | down | -2,8857257 | CLRN2      | Homo sapiens clarin 2 (CLRN2), mRNA [NM_001079827]                                                                         |
| A_23_P106042  | 0,029507997 | down | -2,0352478 | CMTM5      | Homo sapiens CKLF-like MARVEL transmembrane domain containing 5 (CMTM5), transcript variant 3, mRNA [NM_001037288]         |
| A_33_P3334615 | 0,022438606 | down | -1,8690815 | CNGA2      | Homo sapiens cyclic nucleotide gated channel alpha 2 (CNGA2), mRNA [NM_005140]                                             |
| A_33_P3220347 | 0,014361652 | down | -1,5842836 | CNPY1      | Homo sapiens canopy FGF signaling regulator 1 (CNPY1), mRNA [NM_001103176]                                                 |
| A_23_P310931  | 0,043720756 | down | -2,2412853 | CNR2       | Homo sapiens cannabinoid receptor 2 (macrophage) (CNR2), mRNA [NM_001841]                                                  |
| A_24_P257478  | 0,025207188 | down | -2,3886561 | COL25A1    | Homo sapiens collagen, type XXV, alpha 1 (COL25A1), transcript variant 1, mRNA [NM_198721]                                 |
| A_23_P134627  | 0,009714678 | down | -2,6834006 | COL26A1    | Homo sapiens collagen, type XXVI, alpha 1 (COL26A1), transcript variant 2, mRNA [NM_133457]                                |
| A_23_P500464  | 0,02084132  | down | -1,5156122 | COL2A1     | Homo sapiens collagen, type II, alpha 1 (COL2A1), transcript variant 1, mRNA [NM_001844]                                   |
| A_33_P3298830 | 0,04802027  | down | -1,5998613 | COL4A2-AS2 | PREDICTED: Homo sapiens COL4A2 antisense RNA 2 (COL4A2-AS2), misc_RNA [XR_158875]                                          |
| A_33_P3268734 | 0,013409594 | down | -1,889081  | COL5A1-AS1 | CR748640 Soares_NFL_T_GBC_S1 Homo sapiens cDNA clone IMAGp971L0898 ; IMAGE:2348699 5', mRNA sequence [CR74864]             |
| A_33_P3363470 | 0,044834632 | down | -1,859182  | COL6A4P1   | collagen, type VI, alpha 4 pseudogene 1 [Source:HGNC Symbol;Acc:HGNC:33484] [ENST00000508169]                              |
| A_23_P404698  | 0,008921796 | down | -1,8799448 | COL6A5     | Homo sapiens collagen, type VI, alpha 5 (COL6A5), transcript variant 2, mRNA [NM_153264]                                   |
| A_33_P3367748 | 0,047925796 | down | -1,6672007 | COL9A2     | collagen, type IX, alpha 2 [Source:HGNC Symbol;Acc:HGNC:2218] [ENST00000461118]                                            |
| A_23_P258164  | 0,002234575 | down | -1,7419977 | CORT       | Homo sapiens cortistatin (CORT), mRNA [NM_001302]                                                                          |
| A_33_P3279610 | 0,006845136 | down | -2,68844   | COX6A2     | Homo sapiens cytochrome c oxidase subunit VIa polypeptide 2 (COX6A2), mRNA [NM_005205]                                     |

|                |             |      |            |               |                                                                                                                           |
|----------------|-------------|------|------------|---------------|---------------------------------------------------------------------------------------------------------------------------|
| A_23_P31161    | 0,021397408 | down | -2,2954264 | CPA2          | Homo sapiens carboxypeptidase A2 (pancreatic) (CPA2), mRNA [NM_001869]                                                    |
| A_33_P3572454  | 0,0469599   | down | -1,8450403 | CPEB1-AS1     | Homo sapiens CPEB1 antisense RNA 1 (CPEB1-AS1), long non-coding RNA [NR_046096]                                           |
| A_24_P187799   | 0,011223841 | down | -1,6574252 | CPED1         | Homo sapiens cadherin-like and PC-esterase domain containing 1 (CPED1), transcript variant 1, mRNA [NM_024913]            |
| A_33_P3288135  | 0,03557338  | down | -1,6077269 | CPLX2         | complexin 2 [Source:HGNC Symbol;Acc:HGNC:2310] [ENST00000506642]                                                          |
| A_33_P3415300  | 3,22E-04    | down | -1,8253644 | CPLX2         | Homo sapiens complexin 2 (CPLX2), transcript variant 1, mRNA [NM_006650]                                                  |
| A_23_P16694    | 0,001492748 | down | -2,3275268 | CPS1-IT1      | Homo sapiens CPS1 intronic transcript 1 (non-protein coding) (CPS1-IT1), long non-coding RNA [NR_002763]                  |
| A_23_P6066     | 0,005217733 | down | -2,4568622 | CPXM1         | Homo sapiens carboxypeptidase X (M14 family), member 1 (CPXM1), transcript variant 1, mRNA [NM_019609]                    |
| A_33_P3314151  | 5,65E-04    | down | -2,5952857 | CRACR2A       | Homo sapiens calcium release activated channel regulator 2A (CRACR2A), transcript variant 1, mRNA [NM_001144958]          |
| A_32_P384562   | 0,040731587 | up   | 1,8812089  | CROCCP3       | Homo sapiens ciliary rootlet coiled-coil, rootletin pseudogene 3 (CROCCP3), non-coding RNA [NR_023386]                    |
| A_33_P3317670  | 0,03860851  | down | -1,6800821 | CRP           | Homo sapiens C-reactive protein, pentraxin-related (CRP), mRNA [NM_000567]                                                |
| A_23_P132147   | 0,02914792  | down | -1,5891044 | CRYAA         | Homo sapiens crystallin, alpha A (CRYAA), mRNA [NM_000394]                                                                |
| A_24_P11061    | 0,015850281 | down | -2,6343973 | CSAG1         | Homo sapiens chondrosarcoma associated gene 1 (CSAG1), transcript variant a, mRNA [NM_153478]                             |
| A_33_P3341442  | 0,023133043 | down | -2,068512  | CSF2RB        | Homo sapiens colony stimulating factor 2 receptor, beta, low-affinity (granulocyte-macrophage) (CSF2RB), mRNA [NM_000395] |
| A_24_P263284   | 0,023453342 | down | -1,5171199 | CSMD2         | Homo sapiens CUB and Sushi multiple domains 2 (CSMD2), transcript variant 2, mRNA [NM_052896]                             |
| A_21_P0011331  | 0,028115246 | down | -2,1181018 | CSPG4         | Homo sapiens chondroitin sulfate proteoglycan 4 (CSPG4), mRNA [NM_001897]                                                 |
| A_33_P3397670  | 0,016647432 | down | -1,6904874 | CSPG4P1Y      | Homo sapiens chondroitin sulfate proteoglycan 4 pseudogene 1, Y-linked (CSPG4P1Y), non-coding RNA [NR_001554]             |
| A_33_P3344046  | 0,04674656  | down | -1,6149155 | CST13P        | Homo sapiens cystatin 13, pseudogene (CST13P), non-coding RNA [NR_001279]                                                 |
| A_23_P68601    | 0,007800755 | down | -1,7359333 | CST7          | Homo sapiens cystatin F (leukocystatin) (CST7), mRNA [NM_003650]                                                          |
| A_23_P96633    | 0,007769989 | down | -3,34114   | CT55          | Homo sapiens cancer/testis antigen 55 (CT55), transcript variant 1, mRNA [NM_001031705]                                   |
| A_33_P3318343  | 0,014935905 | down | -3,2943294 | CTAG2         | Homo sapiens cancer/testis antigen 2 (CTAG2), transcript variant 2, mRNA [NM_020994]                                      |
| A_19_P00317835 | 0,030327663 | down | -1,6346669 | CTD-3080P12.3 | Homo sapiens uncharacterized LOC101928857 (CTD-3080P12.3), long non-coding RNA [NR_109911]                                |
| A_33_P3302191  | 0,028284203 | down | -1,5007458 | CTNNA3        | Homo sapiens catenin (cadherin-associated protein), alpha 3 (CTNNA3), transcript variant 1, mRNA [NM_013266]              |
| A_23_P431139   | 0,012986339 | down | -1,637884  | CTRB1         | Homo sapiens chymotrypsinogen B1 (CTRB1), mRNA [NM_001906]                                                                |
| A_33_P3712341  | 0,029308213 | down | -1,9806979 | CXCL12        | Homo sapiens chemokine (C-X-C motif) ligand 12 (CXCL12), transcript variant 3, mRNA [NM_001033886]                        |
| A_23_P109913   | 0,026102223 | down | -1,5543842 | CXCR6         | Homo sapiens chemokine (C-X-C motif) receptor 6 (CXCR6), mRNA [NM_006564]                                                 |
| A_23_P62227    | 0,00877738  | down | -1,9773695 | CXorf21       | Homo sapiens chromosome X open reading frame 21 (CXorf21), mRNA [NM_025159]                                               |
| A_33_P3224100  | 0,026299298 | down | -1,5186739 | CXorf22       | Homo sapiens chromosome X open reading frame 22 (CXorf22), mRNA [NM_152632]                                               |
| A_33_P3256063  | 0,009198226 | down | -1,9772589 | CXorf30       | chromosome X open reading frame 30 [Source:HGNC Symbol;Acc:HGNC:27298] [ENST000000378653]                                 |
| A_33_P3250308  | 0,007533446 | down | -1,6791451 | CXorf38       | chromosome X open reading frame 38 [Source:HGNC Symbol;Acc:HGNC:28589] [ENST000000378421]                                 |
| A_33_P3302275  | 0,024101624 | down | -1,7963018 | CXorf66       | Homo sapiens chromosome X open reading frame 66 (CXorf66), mRNA [NM_001013403]                                            |
| A_24_P400457   | 0,0206838   | down | -1,834865  | CYB5RL        | Homo sapiens cytochrome b5 reductase-like (CYB5RL), mRNA [NM_001031672]                                                   |
| A_23_P129169   | 0,041386057 | down | -1,5027083 | CYP11A1       | Homo sapiens cytochrome P450, family 11, subfamily A, polypeptide 1 (CYP11A1), transcript variant 1, mRNA [NM_000781]     |
| A_23_P215997   | 0,002778934 | down | -1,977991  | CYP11B2       | Homo sapiens cytochrome P450, family 11, subfamily B, polypeptide 2 (CYP11B2), mRNA [NM_000498]                           |
| A_32_P86289    | 0,024997668 | down | -2,0580502 | CYP19A1       | Homo sapiens cytochrome P450, family 19, subfamily A, polypeptide 1 (CYP19A1), transcript variant 2, mRNA [NM_031226]     |
| A_33_P3294764  | 0,032925136 | down | -1,7042578 | CYP1B1-AS1    | Homo sapiens CYP1B1 antisense RNA 1 (CYP1B1-AS1), long non-coding RNA [NR_027252]                                         |
| A_23_P210109   | 0,035814576 | down | -1,7915407 | CYP26B1       | Homo sapiens cytochrome P450, family 26, subfamily B, polypeptide 1 (CYP26B1), transcript variant 1, mRNA [NM_019885]     |
| A_33_P3264667  | 0,033385508 | down | -2,4411025 | CYP26C1       | Homo sapiens cytochrome P450, family 26, subfamily C, polypeptide 1 (CYP26C1), mRNA [NM_183374]                           |
| A_23_P143734   | 0,008938405 | up   | 1,5135046  | CYP2D6        | Homo sapiens cytochrome P450, family 2, subfamily D, polypeptide 6 (CYP2D6), transcript variant 1, mRNA [NM_000106]       |
| A_23_P89981    | 0,002488869 | down | -2,5774465 | CYP2F1        | Homo sapiens cytochrome P450, family 2, subfamily F, polypeptide 1 (CYP2F1), mRNA [NM_000774]                             |
| A_33_P3225562  | 0,036734223 | up   | 1,9440111  | CYP2G1P       | Homo sapiens cytochrome P450, family 2, subfamily G, polypeptide 1 pseudogene (CYP2G1P), non-coding RNA [NR_040249]       |
| A_33_P3251342  | 0,016320314 | down | -2,0000348 | CYP3A4        | Homo sapiens cytochrome P450, family 3, subfamily A, polypeptide 4 (CYP3A4), transcript variant 1, mRNA [NM_017460]       |
| A_33_P3318117  | 0,039689284 | down | -1,8858395 | CYP3A7        | Homo sapiens cytochrome P450, family 3, subfamily A, polypeptide 7 (CYP3A7), mRNA [NM_000765]                             |
| A_33_P3382471  | 0,003357379 | down | -2,6018145 | CYP4A22       | Homo sapiens cytochrome P450, family 4, subfamily A, polypeptide 22 (CYP4A22), mRNA [NM_001010969]                        |
| A_21_P0010756  | 0,022373417 | down | -1,8354546 | CYP4Z1        | Homo sapiens cytochrome P450, family 4, subfamily Z, polypeptide 1 (CYP4Z1), mRNA [NM_178134]                             |
| A_33_P3762733  | 0,006513609 | down | -1,5170356 | D21S2088E     | Homo sapiens D21S2088E (D21S2088E), long non-coding RNA [NR_040254]                                                       |
| A_33_P3288104  | 0,020269053 | down | -2,5339923 | DAAM2         | dishevelled associated activator of morphogenesis 2 [Source:HGNC Symbol;Acc:HGNC:18143] [ENST00000405961]                 |
| A_24_P203134   | 0,025951901 | down | -1,6571937 | DCAF12L1      | Homo sapiens DDB1 and CUL4 associated factor 12-like 1 (DCAF12L1), mRNA [NM_178470]                                       |
| A_33_P3309999  | 0,04150654  | down | -1,8166949 | DCAF12L2      | Homo sapiens DDB1 and CUL4 associated factor 12-like 2 (DCAF12L2), mRNA [NM_001013628]                                    |
| A_33_P3250740  | 0,036202684 | down | -1,8845214 | DCAF8L1       | Homo sapiens DDB1 and CUL4 associated factor 8-like 1 (DCAF8L1), mRNA [NM_001017930]                                      |

|               |             |      |            |               |                                                                                                                             |
|---------------|-------------|------|------------|---------------|-----------------------------------------------------------------------------------------------------------------------------|
| A_33_P3291748 | 0,02801496  | down | -1,7237383 | DCDC5         | Homo sapiens doublecortin domain containing 5 (DCDC5), mRNA [NM_020869]                                                     |
| A_33_P3298236 | 0,04807997  | down | -1,5764133 | DCHS2         | Homo sapiens dachous cadherin-related 2 (DCHS2), transcript variant 2, mRNA [NM_001142552]                                  |
| A_33_P3302777 | 0,049691927 | down | -2,275277  | DCLK1         | Homo sapiens doublecortin-like kinase 1 (DCLK1), transcript variant 1, mRNA [NM_004734]                                     |
| A_23_P314798  | 0,005699699 | down | -2,054663  | DCST2         | Homo sapiens DC-STAMP domain containing 2 (DCST2), mRNA [NM_144622]                                                         |
| A_33_P3406686 | 2,43E-04    | down | -2,0665302 | DCTN1         | Homo sapiens dynactin 1 (DCTN1), transcript variant 7, non-coding RNA [NR_033935]                                           |
| A_23_P2317    | 0,014728752 | down | -1,9737356 | DDN           | Homo sapiens dendrin (DDN), mRNA [NM_015086]                                                                                |
| A_33_P3284621 | 0,032165885 | down | -1,7418137 | DDR2          | discoidin domain receptor tyrosine kinase 2 [Source:HGNC Symbol;Acc:HGNC:2731] [ENST00000367922]                            |
| A_33_P3322307 | 0,03985162  | up   | 1,6604378  | DDX11         | Homo sapiens DEAD/H (Asp-Glu-Ala-Asp/His) box helicase 11 (DDX11), transcript variant 5, mRNA [NM_001257145]                |
| A_33_P3766913 | 0,013309958 | down | -1,6925575 | DEFA10P       | Homo sapiens defensin, alpha 10 pseudogene (DEFA10P), non-coding RNA [NR_029386]                                            |
| A_24_P363711  | 0,008533821 | down | -1,5578359 | DEFA6         | Homo sapiens defensin, alpha 6, Paneth cell-specific (DEFA6), mRNA [NM_001926]                                              |
| A_33_P3358815 | 0,02766882  | down | -1,5146904 | DEFB103A      | Homo sapiens defensin, beta 103A (DEFB103A), mRNA [NM_001081551]                                                            |
| A_23_P9018    | 0,03737975  | down | -1,6921226 | DEFB104B      | Homo sapiens defensin, beta 104B (DEFB104B), mRNA [NM_001040702]                                                            |
| A_23_P425814  | 0,001431951 | down | -2,1869211 | DEFB106B      | Homo sapiens defensin, beta 106B (DEFB106B), mRNA [NM_001040704]                                                            |
| A_33_P3370454 | 0,029209057 | down | -1,6868416 | DEFB108B      | Homo sapiens defensin, beta 108B (DEFB108B), mRNA [NM_001002035]                                                            |
| A_33_P3400552 | 0,014533272 | down | -2,0616431 | DEFB108B      | Homo sapiens defensin, beta 108B (DEFB108B), mRNA [NM_001002035]                                                            |
| A_33_P3272274 | 0,03854113  | down | -1,5066607 | DEFB110       | Homo sapiens defensin, beta 110 locus (DEFB110), transcript variant 2, mRNA [NM_001037728]                                  |
| A_33_P3354201 | 0,008366687 | down | -1,9586437 | DEFB114       | Homo sapiens defensin, beta 114 (DEFB114), mRNA [NM_001037499]                                                              |
| A_33_P3362331 | 0,033105385 | up   | 1,5374974  | DEFB130       | Homo sapiens defensin, beta 130 (DEFB130), mRNA [NM_001037804]                                                              |
| A_33_P3397545 | 0,012391587 | down | -1,6570518 | DEFB135       | Homo sapiens defensin, beta 135 (DEFB135), mRNA [NM_001033017]                                                              |
| A_23_P320124  | 0,027572913 | down | -1,6056577 | DEFT1P        | Homo sapiens defensin, theta 1 pseudogene (DEFT1P), non-coding RNA [NR_036686]                                              |
| A_33_P3312686 | 0,037015967 | down | -1,5057763 | DGAT2L6       | Homo sapiens diacylglycerol O-acyltransferase 2-like 6 (DGAT2L6), mRNA [NM_198512]                                          |
| A_33_P3310164 | 0,04859753  | down | -1,7201254 | DGKB          | Homo sapiens diacylglycerol kinase, beta 90kDa (DGKB), transcript variant 1, mRNA [NM_004080]                               |
| A_33_P3310172 | 0,007656447 | down | -3,0667126 | DGKB          | Homo sapiens diacylglycerol kinase, beta 90kDa (DGKB), transcript variant 2, mRNA [NM_145695]                               |
| A_21_P0000776 | 0,03796289  | down | -1,7554238 | DIO2-AS1      | Homo sapiens DIO2 antisense RNA 1 (DIO2-AS1), long non-coding RNA [NR_038355]                                               |
| A_33_P3246513 | 0,023300625 | down | -1,5247034 | DIO3          | Homo sapiens deiodinase, iodothyronine, type III (DIO3), mRNA [NM_001362]                                                   |
| A_33_P3400903 | 0,04463355  | down | -1,8349433 | DISC2         | Homo sapiens disrupted in schizophrenia 2 (non-protein coding) (DISC2), long non-coding RNA [NR_002227]                     |
| A_32_P327679  | 0,012974867 | down | -2,1272712 | DKFZP434K028  | Homo sapiens uncharacterized LOC26070 (DKFZP434K028), long non-coding RNA [NR_026882]                                       |
| A_33_P3328782 | 0,031162087 | down | -1,568641  | DKFZP434L187  | Homo sapiens uncharacterized LOC26082 (DKFZP434L187), long non-coding RNA [NR_026771]                                       |
| A_33_P3852239 | 0,003500327 | down | -2,5923839 | DKFZp686K1684 | Homo sapiens uncharacterized LOC440034 (DKFZp686K1684), long non-coding RNA [NR_033971]                                     |
| A_33_P3419032 | 0,01332148  | down | -1,7779032 | DLG2          | Homo sapiens cDNA FLJ45207 fis, clone BRCAN2010665, highly similar to Channel associated protein of synapse-110. [AK127150] |
| A_23_P392317  | 0,007740615 | down | -1,8077958 | DLGAP2        | Homo sapiens discs, large (Drosophila) homolog-associated protein 2 (DLGAP2), transcript variant 1, mRNA [NM_004745]        |
| A_33_P3297813 | 0,029551955 | down | -1,6679462 | DMD           | Homo sapiens dystrophin, mRNA (cDNA clone IMAGE:5274415), complete cds. [BC036103]                                          |
| A_23_P54612   | 0,041041426 | down | -1,6262472 | DNAAF1        | Homo sapiens dynein, axonemal, assembly factor 1 (DNAAF1), mRNA [NM_178452]                                                 |
| A_33_P3250338 | 0,04739361  | down | -1,6457335 | DNAH10        | dynein, axonemal, heavy chain 10 [Source:HGNC Symbol;Acc:HGNC:2941] [ENST00000614082]                                       |
| A_33_P3415124 | 0,025411185 | down | -1,6654321 | DNAH10OS      | Homo sapiens cDNA FLJ45278 fis, clone BRHIP3001141. [AK127211]                                                              |
| A_21_P0011612 | 0,038796496 | down | -1,6803192 | DNAH17        | Homo sapiens dynein, axonemal, heavy chain 17 (DNAH17), mRNA [NM_173628]                                                    |
| A_21_P0011613 | 0,01007361  | down | -1,7394402 | DNAH17        | Homo sapiens dynein, axonemal, heavy chain 17 (DNAH17), mRNA [NM_173628]                                                    |
| A_21_P0011629 | 0,005205224 | down | -3,5004113 | DNAH17-AS1    | Homo sapiens DNAH17 antisense RNA 1 (DNAH17-AS1), long non-coding RNA [NR_102401]                                           |
| A_23_P351168  | 0,023482013 | down | -1,5141796 | DNAJB7        | Homo sapiens DnaJ (Hsp40) homolog, subfamily B, member 7 (DNAJB7), mRNA [NM_145174]                                         |
| A_33_P3225066 | 0,018797975 | down | -1,7043399 | DNAJC12       | Homo sapiens DnaJ (Hsp40) homolog, subfamily C, member 12 (DNAJC12), transcript variant 2, mRNA [NM_201262]                 |
| A_24_P324368  | 0,02482619  | down | -1,5848008 | DNAJC14       | Homo sapiens DnaJ (Hsp40) homolog, subfamily C, member 14 (DNAJC14), mRNA [NM_032364]                                       |
| A_33_P3389216 | 0,030128539 | down | -2,2425702 | DNM3OS        | Homo sapiens DNM3 opposite strand/antisense RNA (DNM3OS), transcript variant 1, long non-coding RNA [NR_038397]             |
| A_23_P17673   | 0,007485096 | down | -1,655853  | DNMT3L        | Homo sapiens DNA (cytosine-5-)-methyltransferase 3-like (DNMT3L), transcript variant 1, mRNA [NM_013369]                    |
| A_21_P0000604 | 0,0333518   | down | -1,6873538 | DOC2GP        | Homo sapiens double C2-like domains, gamma, pseudogene (DOC2GP), non-coding RNA [NR_033791]                                 |
| A_24_P263653  | 0,0242788   | up   | 1,5383873  | DOCK2         | Homo sapiens dedicator of cytokinesis 2 (DOCK2), mRNA [NM_004946]                                                           |
| A_21_P0014196 | 0,011244023 | down | -1,5759659 | DOCK4-AS1     | Homo sapiens DOCK4 antisense RNA 1 (DOCK4-AS1), long non-coding RNA [NR_103806]                                             |
| A_23_P152262  | 0,026854055 | down | -2,005611  | DPEP1         | Homo sapiens dipeptidase 1 (renal) (DPEP1), transcript variant 1, mRNA [NM_004413]                                          |
| A_23_P129413  | 0,04406817  | down | -1,8766406 | DPEP3         | Homo sapiens dipeptidase 3 (DPEP3), transcript variant 1, mRNA [NM_022357]                                                  |
| A_33_P3211356 | 0,024918947 | down | -1,8567276 | DPP10         | Homo sapiens dipeptidyl-peptidase 10 (non-functional) (DPP10), transcript variant 4, mRNA [NM_001178037]                    |



|                |             |      |            |           |                                                                                                                           |
|----------------|-------------|------|------------|-----------|---------------------------------------------------------------------------------------------------------------------------|
| A_33_P3423556  | 0,0450772   | down | -1,6422315 | DPP6      | dipeptidyl-peptidase 6 [Source:HGNC Symbol;Acc:HGNC:3010] [ENST00000462622]                                               |
| A_33_P3402963  | 0,011867359 | down | -2,3022385 | DPRX      | Homo sapiens divergent-paired related homeobox (DPRX), mRNA [NM_001012728]                                                |
| A_23_P210224   | 0,03756614  | down | -1,6590161 | DPYSL5    | Homo sapiens dihydropyrimidinase-like 5 (DPYSL5), transcript variant 1, mRNA [NM_020134]                                  |
| A_23_P401691   | 0,016863316 | down | -1,7007902 | DPYSL5    | Homo sapiens dihydropyrimidinase-like 5 (DPYSL5), transcript variant 1, mRNA [NM_020134]                                  |
| A_33_P3230841  | 0,005046258 | down | -2,2503648 | DUPD1     | Homo sapiens dual specificity phosphatase and pro isomerase domain containing 1 (DUPD1), mRNA [NM_001003892]              |
| A_21_P0014945  | 0,0229177   | down | -1,6244951 | DUX4      | PREDICTED: Homo sapiens double homeobox 4-like (DUX4L), partial ncRNA [XR_431831]                                         |
| A_33_P3308586  | 0,012136263 | down | -2,7378514 | DUXA      | Homo sapiens double homeobox A (DUXA), mRNA [NM_001012729]                                                                |
| A_23_P360990   | 0,013973192 | down | -1,7379928 | DYDC1     | Homo sapiens DPY30 domain containing 1 (DYDC1), transcript variant 1, mRNA [NM_138812]                                    |
| A_23_P391396   | 0,014558342 | down | -1,7974476 | EBF3      | Homo sapiens early B-cell factor 3 (EBF3), mRNA [NM_001005463]                                                            |
| A_33_P3401701  | 0,04848501  | down | -1,7141898 | EDNRA     | Homo sapiens endothelin receptor type A (EDNRA), transcript variant 1, mRNA [NM_001957]                                   |
| A_33_P3785051  | 0,014296101 | down | -1,5280104 | EFCAB10   | Homo sapiens cDNA clone IMAGE:6616931, partial cds. [BC062748]                                                            |
| A_33_P3341399  | 0,028450297 | down | -2,275723  | EFCAB5    | Homo sapiens EF-hand calcium binding domain 5 (EFCAB5), transcript variant 1, mRNA [NM_198529]                            |
| A_33_P3242878  | 0,003934616 | down | -2,8881428 | EFCAB6    | Homo sapiens EF-hand calcium binding domain 6 (EFCAB6), transcript variant 1, mRNA [NM_022785]                            |
| A_33_P3289596  | 0,034285527 | down | -1,7455719 | EFR3B     | Homo sapiens EFR3 homolog B ( <i>S. cerevisiae</i> ) (EFR3B), mRNA [NM_014971]                                            |
| A_21_P0012412  | 0,04386375  | down | -1,8561323 | EGFEM1P   | Homo sapiens EGF-like and EMI domain containing 1, pseudogene (EGFEM1P), non-coding RNA [NR_021485]                       |
| A_33_P3367577  | 0,025148116 | down | -1,6013718 | EIF4ENIF1 | eukaryotic translation initiation factor 4E nuclear import factor 1 [Source:HGNC Symbol;Acc:HGNC:16687] [ENST00000397520] |
| A_33_P3265504  | 0,008006132 | down | -1,5530111 | EIF5AL1   | Homo sapiens eukaryotic translation initiation factor 5A-like 1 (EIF5AL1), mRNA [NM_001099692]                            |
| A_33_P3235204  | 0,013914954 | down | -1,718016  | ELMOD3    | Homo sapiens ELMO/CED-12 domain containing 3 (ELMOD3), transcript variant 1, mRNA [NM_032213]                             |
| A_23_P215454   | 0,04263823  | down | -2,2999966 | ELN       | Homo sapiens elastin (ELN), transcript variant 13, mRNA [NM_001278939]                                                    |
| A_23_P382065   | 0,036078747 | down | -1,7763911 | EMCN      | Homo sapiens endomucin (EMCN), transcript variant 1, mRNA [NM_016242]                                                     |
| A_24_P52887    | 0,017854396 | down | -1,5313406 | ENDOU     | Homo sapiens endonuclease, polyU-specific (ENDOU), transcript variant 2, mRNA [NM_006025]                                 |
| A_33_P3417626  | 0,047544826 | down | -2,0249577 | ENHO      | Homo sapiens energy homeostasis associated (ENHO), mRNA [NM_198573]                                                       |
| A_33_P3411338  | 0,015863022 | down | -1,6056409 | ENPEP     | Homo sapiens glutamyl aminopeptidase (aminopeptidase A) (ENPEP), mRNA [NM_001977]                                         |
| A_23_P410115   | 0,015176682 | down | -2,5132942 | ENTHD1    | Homo sapiens ENTH domain containing 1 (ENTHD1), mRNA [NM_152512]                                                          |
| A_33_P3218975  | 0,042596944 | down | -1,5564153 | ENTPD1    | Homo sapiens ectonucleoside triphosphate diphosphohydrolase 1 (ENTPD1), transcript variant 1, mRNA [NM_001776]            |
| A_33_P3218980  | 0,008420228 | down | -1,7830722 | ENTPD1    | Homo sapiens ectonucleoside triphosphate diphosphohydrolase 1 (ENTPD1), transcript variant 1, mRNA [NM_001776]            |
| A_24_P97374    | 0,03289334  | down | -1,5794563 | EOMES     | Homo sapiens eomesodermin (EOMES), transcript variant 2, mRNA [NM_005442]                                                 |
| A_23_P385199   | 0,002411813 | down | -1,9690264 | EPHA10    | Homo sapiens EPH receptor A10 (EPHA10), transcript variant 2, mRNA [NM_173641]                                            |
| A_23_P18342    | 0,03890482  | down | -1,6254228 | EPHA6     | Homo sapiens EPH receptor A6 (EPHA6), transcript variant 3, mRNA [NM_001278300]                                           |
| A_33_P3408782  | 0,045393586 | down | -1,774031  | EPHA6     | Homo sapiens EPH receptor A6 (EPHA6), transcript variant 1, mRNA [NM_001080448]                                           |
| A_33_P3317168  | 9,59E-05    | down | -2,4836824 | EPS8L3    | Homo sapiens EPS8-like 3 (EPS8L3), transcript variant 1, mRNA [NM_139053]                                                 |
| A_32_P183765   | 0,04826975  | down | -2,016431  | ERBB4     | Homo sapiens erb-b2 receptor tyrosine kinase 4 (ERBB4), transcript variant JM-a/CVT-1, mRNA [NM_005235]                   |
| A_33_P3527931  | 0,006620627 | down | -1,7783923 | ERICH4    | Homo sapiens glutamate-rich 4 (ERICH4), mRNA [NM_001130514]                                                               |
| A_33_P3250165  | 0,02719581  | down | -1,6521742 | ERMN      | ermin, ERM-like protein [Source:HGNC Symbol;Acc:HGNC:29208] [ENST00000411762]                                             |
| A_23_P144843   | 0,048472755 | down | -1,6798735 | ESM1      | Homo sapiens endothelial cell-specific molecule 1 (ESM1), transcript variant 1, mRNA [NM_007036]                          |
| A_24_P383478   | 0,02022964  | down | -1,5490509 | ESR1      | Homo sapiens estrogen receptor 1 (ESR1), transcript variant 1, mRNA [NM_000125]                                           |
| A_33_P3347911  | 3,01E-04    | down | -3,872853  | ESR2      | Homo sapiens estrogen receptor 2 (ER beta) (ESR2), transcript variant g, mRNA [NM_001271877]                              |
| A_23_P391857   | 1,56E-04    | down | -3,0335839 | ESRRB     | Homo sapiens estrogen-related receptor beta (ESRRB), mRNA [NM_004452]                                                     |
| A_24_P7965     | 0,01767049  | down | -3,0306885 | ESRRG     | Homo sapiens estrogen-related receptor gamma (ESRRG), transcript variant 2, mRNA [NM_206594]                              |
| A_33_P3295098  | 0,04833084  | up   | 1,7559806  | ESYT3     | extended synaptotagmin-like protein 3 [Source:HGNC Symbol;Acc:HGNC:24295] [ENST00000289135]                               |
| A_33_P3356325  | 2,89E-04    | down | -1,8960326 | ETV6      | Homo sapiens ets variant 6 (ETV6), mRNA [NM_001987]                                                                       |
| A_19_P00322662 | 0,032146204 | up   | 1,9007689  | EWSAT1    | Homo sapiens Ewing sarcoma associated transcript 1 (EWSAT1), long non-coding RNA [NR_026949]                              |
| A_23_P415820   | 0,014562849 | down | -1,5625918 | EXOC6B    | Homo sapiens mRNA for KIAA0919 protein, partial cds. [AB023136]                                                           |
| A_24_P944973   | 0,035306223 | down | -1,667021  | EYS       | Homo sapiens eyes shut homolog ( <i>Drosophila</i> ) (EYS), transcript variant 3, mRNA [NM_198283]                        |
| A_23_P41314    | 0,001322001 | down | -2,6187067 | F11       | Homo sapiens coagulation factor XI (F11), mRNA [NM_000128]                                                                |
| A_32_P60065    | 0,044208974 | down | -1,7265391 | F2RL2     | Homo sapiens coagulation factor II (thrombin) receptor-like 2 (F2RL2), transcript variant 1, mRNA [NM_004101]             |
| A_32_P41604    | 0,031596623 | down | -1,6880432 | F5        | Homo sapiens coagulation factor V (proaccelerin, labile factor) (F5), mRNA [NM_000130]                                    |
| A_23_P79562    | 0,029691687 | down | -1,843774  | FABP1     | Homo sapiens fatty acid binding protein 1, liver (FABP1), mRNA [NM_001443]                                                |
| A_24_P237927   | 0,04237508  | down | -1,956004  | FAM102B   | Homo sapiens family with sequence similarity 102, member B (FAM102B), mRNA [NM_001010883]                                 |

|                |             |      |            |             |                                                                                                                                     |
|----------------|-------------|------|------------|-------------|-------------------------------------------------------------------------------------------------------------------------------------|
| A_21_P0000066  | 0,023593895 | down | -1,8376143 | FAM104B     | Homo sapiens family with sequence similarity 104, member B (FAM104B), transcript variant 6, mRNA [NM_001166703]                     |
| A_19_P00319160 | 0,009505627 | down | -1,7981164 | FAM107A     | Homo sapiens family with sequence similarity 107, member A (FAM107A), transcript variant 4, mRNA [NM_001282714]                     |
| A_23_P345799   | 0,042048596 | down | -2,1316698 | FAM129C     | Homo sapiens family with sequence similarity 129, member C (FAM129C), transcript variant 1, mRNA [NM_173544]                        |
| A_33_P3350259  | 0,003618136 | down | -2,302685  | FAM129C     | Homo sapiens family with sequence similarity 129, member C (FAM129C), transcript variant 2, mRNA [NM_001098524]                     |
| A_33_P3270668  | 0,016839528 | down | -1,5188427 | FAM131B     | Homo sapiens family with sequence similarity 131, member B (FAM131B), transcript variant a, mRNA [NM_001031690]                     |
| A_32_P923011   | 3,34E-04    | down | -2,1873875 | FAM138A     | Homo sapiens family with sequence similarity 138, member A (FAM138A), long non-coding RNA [NR_026818]                               |
| A_33_P3222501  | 0,01594983  | up   | 1,5802441  | FAM157A     | Homo sapiens family with sequence similarity 157, member A (FAM157A), mRNA [NM_001145248]                                           |
| A_33_P3295786  | 6,02E-04    | down | -2,5948565 | FAM159A     | Homo sapiens family with sequence similarity 159, member A (FAM159A), mRNA [NM_001042693]                                           |
| A_33_P3212849  | 0,028809644 | down | -1,5776689 | FAM170B-AS1 | Homo sapiens FAM170B antisense RNA 1 (FAM170B-AS1), long non-coding RNA [NR_038973]                                                 |
| A_33_P3354076  | 0,036654413 | down | -1,827489  | FAM172BP    | Homo sapiens family with sequence similarity 172, member B, pseudogene (FAM172BP), non-coding RNA [NR_036433]                       |
| A_21_P0008784  | 0,004297308 | down | -1,8934579 | FAM174B     | family with sequence similarity 174, member B [Source:HGNC Symbol;Acc:HGNC:34339] [ENST00000557545]                                 |
| A_24_P231546   | 0,017320273 | down | -1,5601337 | FAM178B     | Homo sapiens family with sequence similarity 178, member B (FAM178B), transcript variant B, mRNA [NM_016490]                        |
| A_33_P3267435  | 0,020403026 | down | -1,7600558 | FAM183CP    | Homo sapiens family with sequence similarity 183, member C, pseudogene (FAM183CP), long non-coding RNA [NR_024473]                  |
| A_24_P298716   | 0,02700291  | down | -2,2583587 | FAM197Y2    | Homo sapiens family with sequence similarity 197, Y-linked, member 2, pseudogene (FAM197Y2), non-coding RNA [NR_001553]             |
| A_23_P304489   | 0,01741108  | down | -1,7784556 | FAM19A5     | Homo sapiens family with sequence similarity 19 (chemokine (C-C motif)-like), member A5 (FAM19A5), transcript variant 2, mRNA [N    |
| A_33_P3374180  | 0,013498561 | down | -2,2330728 | FAM209B     | PREDICTED: Homo sapiens family with sequence similarity 209, member B (FAM209B), transcript variant X1, mRNA [XM_00526041           |
| A_33_P3346635  | 0,02594708  | down | -1,7511193 | FAM20C      | Homo sapiens cDNA FLJ43291 fis, clone MESAN2015515. [AK125281]                                                                      |
| A_24_P751492   | 0,043571632 | down | -1,8563595 | FAM221B     | Homo sapiens family with sequence similarity 221, member B (FAM221B), transcript variant 1, mRNA [NM_001012446]                     |
| A_33_P3354111  | 0,012318901 | down | -1,5293885 | FAM227B     | Homo sapiens family with sequence similarity 227, member B (FAM227B), mRNA [NM_152647]                                              |
| A_33_P3361758  | 0,029240668 | down | -2,503681  | FAM227B     | Homo sapiens family with sequence similarity 227, member B (FAM227B), mRNA [NM_152647]                                              |
| A_33_P3340762  | 0,027402744 | down | -2,1253355 | FAM230A     | PREDICTED: Homo sapiens family with sequence similarity 230, member A (FAM230A), mRNA [XM_006726832]                                |
| A_33_P3348794  | 0,01017505  | down | -1,7918137 | FAM231A     | Homo sapiens family with sequence similarity 231, member A (FAM231A), mRNA [NM_001282321]                                           |
| A_33_P3270104  | 0,021062791 | down | -1,9156722 | FAM26D      | Homo sapiens family with sequence similarity 26, member D (FAM26D), transcript variant 1, mRNA [NM_001256887]                       |
| A_33_P3764636  | 0,03276288  | down | -1,7257786 | FAM41AY1    | Homo sapiens family with sequence similarity 41, member A, Y-linked 1 (FAM41AY1), long non-coding RNA [NR_028083]                   |
| A_32_P426044   | 0,014757811 | down | -2,9857864 | FAM47A      | Homo sapiens family with sequence similarity 47, member A (FAM47A), mRNA [NM_203408]                                                |
| A_33_P3249160  | 0,001634686 | down | -2,3019555 | FAM47C      | Homo sapiens family with sequence similarity 47, member C (FAM47C), mRNA [NM_001013736]                                             |
| A_23_P163711   | 0,033805527 | down | -1,5389714 | FAM57B      | Homo sapiens family with sequence similarity 57, member B (FAM57B), mRNA [NM_031478]                                                |
| A_23_P360354   | 0,027717715 | down | -1,5071845 | FAM81B      | Homo sapiens family with sequence similarity 81, member B (FAM81B), mRNA [NM_152548]                                                |
| A_33_P3212630  | 0,003910977 | down | -1,7625624 | FAM90A1     | Homo sapiens family with sequence similarity 90, member A1 (FAM90A1), mRNA [NM_018088]                                              |
| A_33_P3230822  | 0,006938295 | down | -1,6147572 | FAM90A27P   | family with sequence similarity 90, member A27, pseudogene [Source:HGNC Symbol;Acc:HGNC:43617] [ENST00000593323]                    |
| A_33_P3378777  | 0,019280918 | down | -1,8016951 | FAM99B      | Homo sapiens family with sequence similarity 99, member B (non-protein coding) (FAM99B), long non-coding RNA [NR_026642]            |
| A_32_P203029   | 0,011705165 | up   | 2,05842    | FAM9B       | Homo sapiens family with sequence similarity 9, member B (FAM9B), mRNA [NM_205849]                                                  |
| A_21_P0012091  | 0,033953514 | down | -1,6005809 | FAR2P2      | Homo sapiens fatty acyl CoA reductase 2 pseudogene 2 (FAR2P2), transcript variant 1, long non-coding RNA [NR_046258]                |
| A_21_P0011966  | 0,03946446  | down | -2,303114  | FAR2P2      | Homo sapiens fatty acyl CoA reductase 2 pseudogene 2 (FAR2P2), transcript variant 1, long non-coding RNA [NR_046258]                |
| A_21_P0014038  | 0,037732787 | down | -1,8651702 | FBRSL1      | Homo sapiens fibrosin-like 1 (FBRSL1), mRNA [NM_001142641]                                                                          |
| A_24_P7600     | 0,016325645 | down | -1,7963687 | FBXL7       | Homo sapiens F-box and leucine-rich repeat protein 7 (FBXL7), transcript variant 1, mRNA [NM_012304]                                |
| A_23_P395911   | 7,70E-04    | down | -1,9733268 | FBXO17      | F-box protein 17 [Source:HGNC Symbol;Acc:HGNC:18754] [ENST00000601394]                                                              |
| A_24_P280684   | 0,04529091  | down | -1,6275228 | FBXO40      | Homo sapiens F-box protein 40 (FBXO40), mRNA [NM_016298]                                                                            |
| A_33_P3415475  | 0,007016006 | down | -1,7912946 | FBXO47      | Homo sapiens F-box protein 47 (FBXO47), mRNA [NM_001008777]                                                                         |
| A_33_P3382606  | 0,031009002 | down | -3,421359  | FBXW12      | Homo sapiens F-box and WD repeat domain containing 12 (FBXW12), transcript variant 1, mRNA [NM_207102]                              |
| A_21_P0010561  | 0,031492133 | down | -1,549648  | FCGR1B      | Homo sapiens Fc fragment of IgG, high affinity I <sub>b</sub> , receptor (CD64) (FCGR1B), transcript variant 3, mRNA [NM_001244910] |
| A_23_P200728   | 0,009134237 | down | -2,0077603 | FCGR3A      | Homo sapiens Fc fragment of IgG, low affinity III <sub>a</sub> , receptor (CD16a) (FCGR3A), transcript variant 1, mRNA [NM_000569]  |
| A_23_P157875   | 0,02370182  | down | -2,793071  | FCN1        | Homo sapiens ficolin (collagen/fibrinogen domain containing) 1 (FCN1), mRNA [NM_002003]                                             |
| A_24_P319647   | 0,006348877 | down | -2,4273787 | FCRL2       | Homo sapiens Fc receptor-like 2 (FCRL2), transcript variant 1, mRNA [NM_030764]                                                     |
| A_23_P115200   | 0,013404521 | down | -2,1123626 | FCRL4       | Homo sapiens Fc receptor-like 4 (FCRL4), mRNA [NM_031282]                                                                           |
| A_33_P3335506  | 0,02240652  | down | -1,5982019 | FCRL5       | Fc receptor-like 5 [Source:HGNC Symbol;Acc:HGNC:18508] [ENST00000368190]                                                            |
| A_33_P3335511  | 0,021325678 | down | -1,8054705 | FCRL5       | Homo sapiens Fc receptor-like 5 (FCRL5), transcript variant 2, mRNA [NM_001195388]                                                  |
| A_24_P276576   | 0,041088227 | down | -1,506987  | FCRLA       | Homo sapiens Fc receptor-like A (FCRLA), transcript variant 2, mRNA [NM_032738]                                                     |
| A_19_P00318142 | 0,03127272  | down | -1,6595783 | FENDRR      | Homo sapiens FOXF1 adjacent non-coding developmental regulatory RNA (FENDRR), transcript variant 2, long non-coding RNA [NF         |

|               |             |      |            |           |                                                                                                                    |
|---------------|-------------|------|------------|-----------|--------------------------------------------------------------------------------------------------------------------|
| A_23_P422849  | 0,004525175 | down | -3,2448816 | FERD3L    | Homo sapiens Fer3-like bHLH transcription factor (FERD3L), mRNA [NM_152898]                                        |
| A_33_P3337574 | 0,00257823  | down | -3,0048683 | FGF14-IT1 | Homo sapiens FGF14 intronic transcript 1 (non-protein coding) (FGF14-IT1), long non-coding RNA [NR_036486]         |
| A_23_P427587  | 0,04863393  | down | -1,5415174 | FGF19     | Homo sapiens fibroblast growth factor 19 (FGF19), mRNA [NM_005117]                                                 |
| A_33_P3400248 | 0,031653225 | down | -1,5195261 | FGF20     | Homo sapiens fibroblast growth factor 20 (FGF20), mRNA [NM_019851]                                                 |
| A_23_P153878  | 0,03816743  | down | -1,7560352 | FGF22     | Homo sapiens fibroblast growth factor 22 (FGF22), transcript variant 1, mRNA [NM_020637]                           |
| A_33_P3348719 | 0,017074728 | down | -1,8904246 | FGF9      | Homo sapiens fibroblast growth factor 9 (FGF9), mRNA [NM_002010]                                                   |
| A_24_P226069  | 0,012855742 | down | -2,200535  | FGFBP2    | Homo sapiens fibroblast growth factor binding protein 2 (FGFBP2), mRNA [NM_031950]                                 |
| A_23_P92754   | 0,001855567 | down | -1,6196762 | FGFR4     | Homo sapiens fibroblast growth factor receptor 4 (FGFR4), transcript variant 3, mRNA [NM_213647]                   |
| A_33_P3244585 | 0,010611074 | down | -1,7724673 | FHAD1     | Homo sapiens forkhead-associated (FHA) phosphopeptide binding domain 1 (FHAD1), mRNA [NM_052929]                   |
| A_33_P3849275 | 0,008364818 | down | -1,5197634 | FHL1      | Homo sapiens four and a half LIM domains 1 (FHL1), transcript variant 4, mRNA [NM_001159704]                       |
| A_33_P3347099 | 0,04606654  | down | -2,0981262 | FLJ36000  | Homo sapiens uncharacterized FLJ36000 (FLJ36000), long non-coding RNA [NR_027084]                                  |
| A_33_P3249893 | 0,017608857 | down | -1,6668963 | FLJ37786  | Homo sapiens cDNA FLJ37786 fis, clone BRHIP2028480. [AK095105]                                                     |
| A_33_P3347437 | 0,00698914  | down | -2,2816217 | FLJ39080  | Homo sapiens uncharacterized LOC441355 (FLJ39080), long non-coding RNA [NR_033830]                                 |
| A_33_P3282291 | 0,004138898 | down | -2,082982  | FLJ40039  | Homo sapiens cDNA FLJ40039 fis, clone SYN0V2000397. [AK097358]                                                     |
| A_32_P764462  | 0,009408258 | down | -1,7255485 | FLJ40536  | Homo sapiens cDNA FLJ40536 fis, clone TESTI2047930. [AK097855]                                                     |
| A_33_P3294861 | 0,010472008 | down | -1,5649143 | FLJ40712  | Homo sapiens cDNA FLJ40712 fis, clone THYMU2027249. [AK098031]                                                     |
| A_33_P3259112 | 0,039675087 | down | -1,8512163 | FLJ41278  | Homo sapiens uncharacterized LOC400046 (FLJ41278), long non-coding RNA [NR_033988]                                 |
| A_24_P390668  | 0,045774035 | up   | 1,7456115  | FMNL1     | Homo sapiens formin-like 1 (FMNL1), mRNA [NM_005892]                                                               |
| A_33_P3382303 | 0,007252289 | up   | 1,5629487  | FMNL1     | Homo sapiens formin-like 1 (FMNL1), mRNA [NM_005892]                                                               |
| A_33_P3247559 | 0,041324694 | down | -1,6715589 | FNDCC7    | Homo sapiens fibronectin type III domain containing 7 (FNDCC7), mRNA [NM_001144937]                                |
| A_33_P3264331 | 0,03634445  | down | -1,5333498 | FOXD3     | Homo sapiens forkhead box D3 (FOXD3), mRNA [NM_012183]                                                             |
| A_23_P118254  | 0,038415223 | down | -1,5392998 | FOXF1     | Homo sapiens forkhead box F1 (FOXF1), mRNA [NM_001451]                                                             |
| A_23_P151150  | 0,023757206 | down | -1,749514  | FOXM1     | Homo sapiens forkhead box M1 (FOXM1), transcript variant 1, mRNA [NM_202002]                                       |
| A_23_P159709  | 0,047998704 | down | -1,7458783 | FOXP3     | Homo sapiens forkhead box P3 (FOXP3), transcript variant 1, mRNA [NM_014009]                                       |
| A_33_P3412798 | 0,013932908 | down | -1,6052852 | FRG2B     | Homo sapiens FSHD region gene 2 family, member B (FRG2B), mRNA [NM_001080998]                                      |
| A_33_P3361831 | 0,015000658 | down | -1,6056765 | FRG2C     | Homo sapiens FSHD region gene 2 family, member C (FRG2C), mRNA [NM_001124759]                                      |
| A_23_P135132  | 0,032041963 | down | -1,6696563 | FRMD3     | Homo sapiens FERM domain containing 3 (FRMD3), transcript variant 1, mRNA [NM_174938]                              |
| A_33_P3296772 | 0,022907246 | up   | 1,8994278  | FRMD6-AS1 | Homo sapiens FRMD6 antisense RNA 1 (FRMD6-AS1), long non-coding RNA [NR_037676]                                    |
| A_33_P3603812 | 0,026724193 | down | -1,7006004 | FRMD8     | Homo sapiens FERM domain containing 8 (FRMD8), transcript variant 3, mRNA [NM_001300833]                           |
| A_24_P940275  | 0,01671353  | down | -2,124028  | FRMPD4    | Homo sapiens FERM and PDZ domain containing 4 (FRMPD4), mRNA [NM_014728]                                           |
| A_33_P3223497 | 0,017560655 | down | -1,8986789 | FRY       | Homo sapiens furry homolog (Drosophila) (FRY), mRNA [NM_023037]                                                    |
| A_21_P0014679 | 0,019822974 | down | -1,8882841 | FRY-AS1   | Homo sapiens FRY antisense RNA 1 (FRY-AS1), long non-coding RNA [NR_103839]                                        |
| A_33_P3390918 | 0,019934693 | down | -2,867776  | FSD2      | Homo sapiens fibronectin type III and SPRY domain containing 2 (FSD2), transcript variant 1, mRNA [NM_001007122]   |
| A_23_P385017  | 0,020011328 | down | -1,5888841 | G6PC      | Homo sapiens glucose-6-phosphatase, catalytic subunit (G6PC), transcript variant 1, mRNA [NM_000151]               |
| A_23_P93302   | 0,023259068 | up   | 1,5119251  | GABBR1    | Homo sapiens gamma-aminobutyric acid (GABA) B receptor, 1 (GABBR1), transcript variant 1, mRNA [NM_001470]         |
| A_23_P167121  | 0,021553127 | down | -1,5914401 | GABRA2    | Homo sapiens gamma-aminobutyric acid (GABA) A receptor, alpha 2 (GABRA2), transcript variant 1, mRNA [NM_000807]   |
| A_23_P41847   | 0,030457659 | down | -1,6563475 | GABRA6    | Homo sapiens gamma-aminobutyric acid (GABA) A receptor, alpha 6 (GABRA6), mRNA [NM_000811]                         |
| A_33_P3336715 | 0,03190766  | down | -1,5230186 | GABRB2    | Homo sapiens gamma-aminobutyric acid (GABA) A receptor, beta 2 (GABRB2), transcript variant 1, mRNA [NM_021911]    |
| A_33_P3409266 | 0,004422575 | down | -2,6119633 | GAF2      | Homo sapiens FGF-2 activity-associated protein 2 (GAF2) mRNA, complete cds. [AF220234]                             |
| A_24_P943370  | 0,042670358 | down | -1,6299446 | GAGE1     | Homo sapiens G antigen 1 (GAGE1), transcript variant 2, mRNA [NM_001040663]                                        |
| A_24_P212539  | 0,043055326 | down | -1,903442  | GALM      | Homo sapiens galactose mutarotase (aldose 1-epimerase) (GALM), mRNA [NM_138801]                                    |
| A_33_P3239387 | 0,043270163 | down | -1,8653852 | GALNT13   | Homo sapiens polypeptide N-acetylgalactosaminyltransferase 13 (GALNT13), transcript variant 2, mRNA [NM_001301627] |
| A_23_P76749   | 0,012300794 | down | -2,224294  | GALNT16   | Homo sapiens polypeptide N-acetylgalactosaminyltransferase 16 (GALNT16), transcript variant 2, mRNA [NM_020692]    |
| A_33_P3320017 | 0,03129499  | down | -1,5777336 | GALNTL6   | Homo sapiens polypeptide N-acetylgalactosaminyltransferase-like 6 (GALNTL6), mRNA [NM_001034845]                   |
| A_33_P3320022 | 0,042286485 | down | -1,6095455 | GALNTL6   | Homo sapiens polypeptide N-acetylgalactosaminyltransferase-like 6 (GALNTL6), mRNA [NM_001034845]                   |
| A_23_P153155  | 0,021664225 | down | -1,6480209 | GALR1     | Homo sapiens galanin receptor 1 (GALR1), mRNA [NM_001480]                                                          |
| A_23_P253446  | 0,025692504 | down | -1,5552802 | GAP43     | Homo sapiens growth associated protein 43 (GAP43), transcript variant 2, mRNA [NM_002045]                          |
| A_23_P67646   | 0,034653004 | down | -1,5277807 | GAPDHS    | Homo sapiens glyceraldehyde-3-phosphate dehydrogenase, spermatogenic (GAPDHS), mRNA [NM_014364]                    |
| A_24_P136522  | 0,001867754 | down | -2,1369407 | GARNL3    | Homo sapiens cDNA FLJ38360 fis, clone FEBRA2000462, weakly similar to RAP1 GTPASE ACTIVATING PROTEIN 1. [AK095679] |

|               |             |      |            |          |                                                                                                                            |
|---------------|-------------|------|------------|----------|----------------------------------------------------------------------------------------------------------------------------|
| A_32_P24140   | 0,024756469 | down | -1,8699211 | GAS2     | Homo sapiens growth arrest-specific 2 (GAS2), transcript variant 1, mRNA [NM_005256]                                       |
| A_33_P3266192 | 0,035987016 | down | -1,6881009 | GAS6-AS1 | Homo sapiens hypothetical LOC650669, mRNA (cDNA clone MGC:169000 IMAGE:9021377), complete cds. [BC137379]                  |
| A_24_P374244  | 0,022576097 | down | -1,8060682 | GATA1    | Homo sapiens GATA binding protein 1 (globin transcription factor 1) (GATA1), mRNA [NM_002049]                              |
| A_33_P3276329 | 0,001178022 | down | -2,329487  | GATSL2   | Homo sapiens GATS protein-like 2 (GATSL2), mRNA [NM_001145064]                                                             |
| A_24_P280664  | 0,018959697 | down | -1,543666  | GBP7     | Homo sapiens guanylate binding protein 7 (GBP7), mRNA [NM_207398]                                                          |
| A_33_P3423969 | 0,029979857 | down | -2,2224796 | GBX2     | Homo sapiens gastrulation brain homeobox 2 (GBX2), transcript variant 2, mRNA [NM_001301687]                               |
| A_23_P119886  | 0,011360985 | up   | 2,6298027  | GCKR     | Homo sapiens glucokinase (hexokinase 4) regulator (GCKR), mRNA [NM_001486]                                                 |
| A_24_P49896   | 0,00807113  | down | -3,2250502 | GDPD4    | Homo sapiens glycerophosphodiester phosphodiesterase domain containing 4 (GDPD4), mRNA [NM_182833]                         |
| A_33_P3335895 | 0,02800477  | down | -1,8848543 | GFAP     | Homo sapiens glial fibrillary acidic protein (GFAP), transcript variant 3, mRNA [NM_001242376]                             |
| A_23_P8497    | 0,033993203 | up   | 1,8711636  | GHRHR    | Homo sapiens growth hormone releasing hormone receptor (GHRHR), mRNA [NM_000823]                                           |
| A_23_P427023  | 0,01127144  | down | -1,7846636 | GIMAP1   | Homo sapiens GTPase, IMAP family member 1 (GIMAP1), mRNA [NM_130759]                                                       |
| A_24_P22943   | 0,027324371 | down | -1,803808  | GIPC3    | Homo sapiens GIPC PDZ domain containing family, member 3 (GIPC3), mRNA [NM_133261]                                         |
| A_23_P416666  | 0,03871483  | down | -1,7628706 | GJA10    | Homo sapiens gap junction protein, alpha 10, 62kDa (GJA10), mRNA [NM_032602]                                               |
| A_32_P205241  | 1,61E-04    | down | -3,7297597 | GJA3     | Homo sapiens gap junction protein, alpha 3, 46kDa (GJA3), mRNA [NM_021954]                                                 |
| A_23_P44436   | 0,04893549  | down | -2,1812942 | GKN1     | Homo sapiens gastrokine 1 (GKN1), mRNA [NM_019617]                                                                         |
| A_23_P61317   | 0,023280963 | down | -1,5414157 | GKN2     | Homo sapiens gastrokine 2 (GKN2), mRNA [NM_182536]                                                                         |
| A_23_P209246  | 0,032072127 | up   | 2,425932   | GLI2     | Homo sapiens GLI family zinc finger 2 (GLI2), mRNA [NM_005270]                                                             |
| A_23_P317839  | 0,04206719  | down | -1,5144175 | GLIPR1L1 | Homo sapiens GLI pathogenesis-related 1 like 1 (GLIPR1L1), mRNA [NM_152779]                                                |
| A_23_P425324  | 0,040394273 | down | -2,0531516 | GMCL1P1  | Homo sapiens germ cell-less, spermatogenesis associated 1 pseudogene 1 (GMCL1P1), non-coding RNA [NR_003281]               |
| A_33_P3409939 | 0,013645762 | down | -1,76237   | GNAT3    | Homo sapiens guanine nucleotide binding protein, alpha transducing 3 (GNAT3), mRNA [NM_001102386]                          |
| A_33_P3284004 | 4,19E-04    | down | -2,2367973 | GNN      | Homo sapiens Grp94 neighboring nucleotidase pseudogene (GNN), non-coding RNA [NR_027249]                                   |
| A_33_P3271460 | 0,001068325 | down | -2,3771665 | GOLGA1   | golgin A1 [Source:HGNC Symbol;Acc:HGNC:4424] [ENST00000373551]                                                             |
| A_21_P0011355 | 0,006758985 | down | -1,6644135 | GOLGA8K  | Homo sapiens golgin A8 family, member K (GOLGA8K), mRNA [NM_001282493]                                                     |
| A_23_P9075    | 0,0267155   | down | -1,5356686 | GOT1L1   | Homo sapiens glutamic-oxaloacetate transaminase 1-like 1 (GOT1L1), mRNA [NM_152413]                                        |
| A_24_P944964  | 0,01974662  | down | -2,1319976 | GP5      | Homo sapiens glycoprotein V (platelet) (GP5), mRNA [NM_004488]                                                             |
| A_24_P319374  | 0,012251008 | down | -1,620831  | GPA33    | Homo sapiens glycoprotein A33 (transmembrane) (GPA33), mRNA [NM_005814]                                                    |
| A_23_P68240   | 4,87E-04    | down | -2,0198312 | GPAT2    | Homo sapiens glycerol-3-phosphate acyltransferase 2, mitochondrial (GPAT2), mRNA [NM_207328]                               |
| A_23_P336678  | 0,001395157 | down | -1,8374106 | GPHB5    | Homo sapiens glycoprotein hormone beta 5 (GPHB5), mRNA [NM_145171]                                                         |
| A_33_P3343250 | 0,001750255 | down | -2,2864676 | GPR1     | Homo sapiens G protein-coupled receptor 1 (GPR1), transcript variant 4, mRNA [NM_001261453]                                |
| A_23_P415706  | 0,03804463  | down | -1,501283  | GPR133   | Homo sapiens G protein-coupled receptor 133 (GPR133), mRNA [NM_198827]                                                     |
| A_23_P6943    | 0,046938103 | down | -2,3869176 | GPR15    | Homo sapiens G protein-coupled receptor 15 (GPR15), mRNA [NM_005290]                                                       |
| A_33_P3332576 | 0,006585927 | down | -2,063662  | GPR151   | Homo sapiens G protein-coupled receptor 151 (GPR151), mRNA [NM_194251]                                                     |
| A_33_P3236813 | 0,036663827 | down | -1,6711134 | GPR19    | Homo sapiens G protein-coupled receptor 19 (GPR19), mRNA [NM_006143]                                                       |
| A_23_P434289  | 0,010999681 | down | -1,8822633 | GPR62    | Homo sapiens G protein-coupled receptor 62 (GPR62), mRNA [NM_080865]                                                       |
| A_23_P214727  | 0,03161659  | down | -1,8933461 | GPR63    | Homo sapiens G protein-coupled receptor 63 (GPR63), transcript variant 2, mRNA [NM_030784]                                 |
| A_23_P81683   | 0,005961971 | down | -2,900122  | GPRC6A   | Homo sapiens G protein-coupled receptor, class C, group 6, member A (GPRC6A), transcript variant 1, mRNA [NM_148963]       |
| A_33_P3288832 | 0,036066066 | down | -1,7577938 | GPRIN1   | Homo sapiens G protein regulated inducer of neurite outgrowth 1 (GPRIN1), mRNA [NM_052899]                                 |
| A_23_P49643   | 0,021874988 | down | -1,7441924 | GRAP     | Homo sapiens GRB2-related adaptor protein (GRAP), mRNA [NM_006613]                                                         |
| A_23_P329768  | 0,027018417 | down | -1,6921754 | GREB1    | Homo sapiens growth regulation by estrogen in breast cancer 1 (GREB1), transcript variant a, mRNA [NM_014668]              |
| A_24_P229025  | 0,031088475 | down | -2,0338626 | GRIA3    | Homo sapiens glutamate receptor, ionotropic, AMPA 3 (GRIA3), transcript variant 3, mRNA [NM_001256743]                     |
| A_24_P941896  | 0,011640321 | down | -1,7608724 | GRID1    | Homo sapiens glutamate receptor, ionotropic, delta 1 (GRID1), mRNA [NM_017551]                                             |
| A_23_P257962  | 0,018429821 | down | -1,8486652 | GRIN1    | Homo sapiens glutamate receptor, ionotropic, N-methyl D-aspartate 1 (GRIN1), transcript variant GluN1-1a, mRNA [NM_007327] |
| A_32_P169114  | 0,03321869  | down | -1,513263  | GRIN2A   | Homo sapiens glutamate receptor, ionotropic, N-methyl D-aspartate 2A (GRIN2A), transcript variant 1, mRNA [NM_001134407]   |
| A_24_P381844  | 0,009016948 | down | -1,9644018 | GRIN2A   | Homo sapiens glutamate receptor, ionotropic, N-methyl D-aspartate 2A (GRIN2A), transcript variant 2, mRNA [NM_000833]      |
| A_23_P151264  | 0,02073521  | down | -1,7591082 | GRIN2B   | Homo sapiens glutamate receptor, ionotropic, N-methyl D-aspartate 2B (GRIN2B), mRNA [NM_000834]                            |
| A_23_P347541  | 0,00443829  | down | -2,5857582 | GRIN3A   | Homo sapiens glutamate receptor, ionotropic, N-methyl-D-aspartate 3A (GRIN3A), mRNA [NM_133445]                            |
| A_33_P3279276 | 0,042579386 | down | -2,21045   | GRIP2    | Homo sapiens glutamate receptor interacting protein 2 (GRIP2), mRNA [NM_001080423]                                         |
| A_23_P313542  | 0,03216801  | down | -2,166786  | GRK1     | Homo sapiens G protein-coupled receptor kinase 1 (GRK1), mRNA [NM_002929]                                                  |
| A_33_P3240867 | 0,01873725  | down | -2,384537  | GRK1     | Homo sapiens G protein-coupled receptor kinase 1 (GRK1), mRNA [NM_002929]                                                  |

|                |             |      |            |           |                                                                                                             |
|----------------|-------------|------|------------|-----------|-------------------------------------------------------------------------------------------------------------|
| A_33_P3358943  | 0,015442268 | up   | 1,8035592  | GRM2      | Homo sapiens glutamate receptor, metabotropic 2 (GRM2), transcript variant 1, mRNA [NM_000839]              |
| A_21_P0012432  | 0,043566234 | down | -1,5768262 | GRM7-AS3  | GRM7 antisense RNA 3 [Source:HGNC Symbol;Acc:HGNC:42444] [ENST00000455623]                                  |
| A_33_P3224867  | 0,002138784 | down | -1,9573493 | GSG1      | Homo sapiens germ cell associated 1 (GSG1), transcript variant 5, mRNA [NM_001206842]                       |
| A_32_P58872    | 0,039238624 | down | -2,7026865 | GSG1L     | Homo sapiens GSG1-like (GSG1L), transcript variant 1, mRNA [NM_001109763]                                   |
| A_23_P97606    | 0,010904098 | down | -1,9429742 | GSTM5     | Homo sapiens glutathione S-transferase mu 5 (GSTM5), mRNA [NM_000851]                                       |
| A_21_P0012351  | 0,023995766 | down | -1,6061655 | GSTTP1    | Homo sapiens glutathione S-transferase theta pseudogene 1 (GSTTP1), non-coding RNA [NR_003081]              |
| A_23_P29163    | 0,012940131 | down | -1,6909525 | GSTTP1    | Homo sapiens glutathione S-transferase theta pseudogene 1 (GSTTP1), non-coding RNA [NR_003081]              |
| A_23_P92453    | 0,023681872 | down | -1,5070332 | GSX2      | Homo sapiens GS homeobox 2 (GSX2), mRNA [NM_133267]                                                         |
| A_23_P57020    | 0,004884807 | down | -1,8387595 | GTSF1L    | Homo sapiens gametocyte specific factor 1-like (GTSF1L), transcript variant 2, mRNA [NM_001008901]          |
| A_23_P350001   | 0,033693388 | down | -1,6945769 | GUCY1A2   | Homo sapiens guanylate cyclase 1, soluble, alpha 2 (GUCY1A2), transcript variant 2, mRNA [NM_000855]        |
| A_33_P3253687  | 0,03129755  | down | -1,6448917 | GVINP1    | Homo sapiens GTPase, very large interferon inducible pseudogene 1 (GVINP1), non-coding RNA [NR_003945]      |
| A_21_P0014007  | 0,045544066 | down | -2,184219  | GVQW1     | Homo sapiens cDNA FLJ25547 fis, clone JTH01487. [AK098413]                                                  |
| A_23_P130836   | 0,014197438 | down | -1,7214528 | GZMM      | Homo sapiens granzyme M (lymphocyte met-ase 1) (GZMM), transcript variant 1, mRNA [NM_005317]               |
| A_23_P26457    | 0,043562904 | down | -1,7985305 | HBA2      | Homo sapiens hemoglobin, alpha 2 (HBA2), mRNA [NM_000517]                                                   |
| A_23_P47665    | 0,022798194 | down | -1,9191141 | HBE1      | Homo sapiens hemoglobin, epsilon 1 (HBE1), mRNA [NM_005330]                                                 |
| A_21_P0004638  | 0,016782567 | down | -1,5101095 | HCG14     | Homo sapiens HLA complex group 14 (non-protein coding) (HCG14), long non-coding RNA [NR_104117]             |
| A_33_P3225418  | 0,003910848 | down | -2,7474208 | HCG9      | Homo sapiens HLA complex group 9 (non-protein coding) (HCG9), long non-coding RNA [NR_028032]               |
| A_24_P365526   | 0,034141503 | down | -2,1688495 | HCK       | Homo sapiens HCK proto-oncogene, Src family tyrosine kinase (HCK), transcript variant 1, mRNA [NM_002110]   |
| A_33_P3290677  | 0,004864968 | down | -2,2523031 | HELT      | Homo sapiens helt bHLH transcription factor (HELT), transcript variant 1, mRNA [NM_001300781]               |
| A_24_P363408   | 0,01041187  | down | -1,946091  | HEY2      | Homo sapiens hes-related family bHLH transcription factor with YRPW motif 2 (HEY2), mRNA [NM_012259]        |
| A_24_P289648   | 0,013605773 | down | -2,7294364 | HFE       | Homo sapiens hemochromatosis (HFE), transcript variant 11, mRNA [NM_139011]                                 |
| A_33_P3328883  | 0,022730727 | down | -1,5646136 | HGC6.3    | Homo sapiens uncharacterized LOC100128124 (HGC6.3), mRNA [NM_001129895]                                     |
| A_33_P3267640  | 3,50E-04    | down | -1,8998362 | HGFAC     | Homo sapiens HGF activator (HGFAC), transcript variant 1, mRNA [NM_001297439]                               |
| A_19_P00316839 | 0,021494688 | down | -1,566805  | HHLA1     | Homo sapiens HERV-H LTR-associating 1 (HHLA1), mRNA [NM_001145095]                                          |
| A_19_P00321196 | 0,012742592 | down | -1,6750767 | HHLA1     | Homo sapiens HERV-H LTR-associating 1 (HHLA1), mRNA [NM_001145095]                                          |
| A_24_P414658   | 0,026600687 | down | -1,784871  | HIST1H2AG | histone cluster 1, H2ag [Source:HGNC Symbol;Acc:HGNC:4737] [ENST00000359193]                                |
| A_33_P3400578  | 0,049615394 | down | -2,2382545 | HLF       | Homo sapiens hepatic leukemia factor (HLF), mRNA [NM_002126]                                                |
| A_23_P30204    | 0,031031884 | down | -1,7356155 | HMHB1     | Homo sapiens histocompatibility (minor) HB-1 (HMHB1), mRNA [NM_021182]                                      |
| A_24_P314515   | 0,001820662 | down | -3,7560997 | HNF1A-AS1 | Homo sapiens HNF1A antisense RNA 1 (HNF1A-AS1), long non-coding RNA [NR_024345]                             |
| A_24_P330822   | 0,013213486 | down | -1,9828106 | HNF1B     | HNF1 homeobox B [Source:HGNC Symbol;Acc:HGNC:11630] [ENST00000621123]                                       |
| A_21_P0010501  | 0,032022167 | down | -1,7861295 | HOTAIR    | BROAD Institute lincRNA (HOTAIR), lincRNA [TCONS_00079053_HOTAIR]                                           |
| A_21_P0010502  | 0,029631104 | down | -1,9983487 | HOTAIR    | Homo sapiens HOX transcript antisense RNA (HOTAIR), transcript variant 3, long non-coding RNA [NR_047518]   |
| A_21_P0010497  | 0,024294227 | down | -2,1730926 | HOTTIP    | Homo sapiens HOXA distal transcript antisense RNA (HOTTIP), long non-coding RNA [NR_037843]                 |
| A_33_P3645079  | 0,02658369  | down | -1,6168351 | HOXA-AS3  | Homo sapiens HOXA cluster antisense RNA 3 (HOXA-AS3), transcript variant 1, long non-coding RNA [NR_038831] |
| A_33_P3272957  | 0,007225943 | down | -1,6565276 | HOXA-AS3  | Homo sapiens HOXA cluster antisense RNA 3 (HOXA-AS3), transcript variant 1, long non-coding RNA [NR_038831] |
| A_33_P3303956  | 0,006335457 | down | -1,9405333 | HOXA-AS3  | Homo sapiens HOXA cluster antisense RNA 3 (HOXA-AS3), transcript variant 1, long non-coding RNA [NR_038831] |
| A_23_P93772    | 0,04898771  | down | -1,9598454 | HOXA5     | Homo sapiens homeobox A5 (HOXA5), mRNA [NM_019102]                                                          |
| A_23_P118675   | 0,031270694 | down | -1,7261444 | HOXB1     | Homo sapiens homeobox B1 (HOXB1), mRNA [NM_002144]                                                          |
| A_23_P370588   | 0,04663072  | down | -1,6035045 | HOXB8     | Homo sapiens homeobox B8 (HOXB8), mRNA [NM_024016]                                                          |
| A_24_P124558   | 0,02194761  | down | -1,5636178 | HOXC8     | Homo sapiens homeobox C8 (HOXC8), mRNA [NM_022658]                                                          |
| A_23_P143029   | 0,044551004 | down | -1,9668746 | HOXD11    | Homo sapiens homeobox D11 (HOXD11), mRNA [NM_021192]                                                        |
| A_23_P210164   | 0,020883225 | down | -1,9059907 | HOXD8     | Homo sapiens homeobox D8 (HOXD8), transcript variant 1, mRNA [NM_019558]                                    |
| A_23_P406782   | 0,019799199 | down | -1,7807523 | HPN       | Homo sapiens hepsin (HPN), transcript variant 1, mRNA [NM_182983]                                           |
| A_23_P61707    | 0,01613162  | down | -2,0155325 | HPSE2     | Homo sapiens heparanase 2 (inactive) (HPSE2), transcript variant 1, mRNA [NM_021828]                        |
| A_23_P57658    | 0,03175189  | down | -1,854061  | HRASLS    | Homo sapiens HRAS-like suppressor (HRASLS), mRNA [NM_020386]                                                |
| A_23_P53018    | 5,47E-04    | down | -1,8466473 | HRASLS5   | Homo sapiens HRAS-like suppressor family, member 5 (HRASLS5), transcript variant 1, mRNA [NM_054108]        |
| A_24_P226508   | 0,026348215 | down | -1,6322298 | HS3ST5    | Homo sapiens heparan sulfate (glucosamine) 3-O-sulfotransferase 5 (HS3ST5), mRNA [NM_153612]                |
| A_23_P351295   | 0,038088456 | down | -1,7974523 | HS3ST5    | Homo sapiens heparan sulfate (glucosamine) 3-O-sulfotransferase 5 (HS3ST5), mRNA [NM_153612]                |
| A_23_P25030    | 0,036976084 | down | -1,6988587 | HSD17B6   | Homo sapiens hydroxysteroid (17-beta) dehydrogenase 6 (HSD17B6), mRNA [NM_003725]                           |

|               |             |      |            |           |                                                                                                                                  |
|---------------|-------------|------|------------|-----------|----------------------------------------------------------------------------------------------------------------------------------|
| A_23_P51580   | 0,035305064 | down | -2,6408658 | HSD3B2    | Homo sapiens hydroxy-delta-5-steroid dehydrogenase, 3 beta- and steroid delta-isomerase 2 (HSD3B2), transcript variant 1, mRNA [ |
| A_33_P3380762 | 0,01645385  | down | -2,218521  | HSD52     | Homo sapiens uncharacterized LOC729467 (HSD52), long non-coding RNA [NR_027120]                                                  |
| A_23_P96497   | 0,010038016 | down | -2,2703576 | HSFX1     | Homo sapiens heat shock transcription factor family, X linked 1 (HSFX1), mRNA [NM_016153]                                        |
| A_33_P3262660 | 0,024654528 | down | -1,5785424 | HSFY1P1   | Homo sapiens heat shock transcription factor, Y-linked 1 pseudogene 1 (HSFY1P1), non-coding RNA [NR_003607]                      |
| A_23_P62446   | 0,017856548 | down | -1,6148437 | HSFY2     | Homo sapiens heat shock transcription factor, Y linked 2 (HSFY2), transcript variant 2, mRNA [NM_001001877]                      |
| A_24_P308029  | 0,008991133 | down | -2,0571911 | HSPB6     | Homo sapiens heat shock protein, alpha-crystallin-related, B6 (HSPB6), mRNA [NM_144617]                                          |
| A_24_P97687   | 0,019812126 | down | -2,5974538 | HTR1A     | Homo sapiens 5-hydroxytryptamine (serotonin) receptor 1A, G protein-coupled (HTR1A), mRNA [NM_000524]                            |
| A_23_P156824  | 8,35E-06    | down | -3,658279  | HTR1B     | Homo sapiens 5-hydroxytryptamine (serotonin) receptor 1B, G protein-coupled (HTR1B), mRNA [NM_000863]                            |
| A_33_P3406836 | 0,009645983 | down | -1,7121874 | HTR1F     | Homo sapiens 5-hydroxytryptamine (serotonin) receptor 1F, G protein-coupled (HTR1F), mRNA [NM_000866]                            |
| A_23_P433586  | 0,033621114 | down | -1,6894854 | HTR2C     | 5-hydroxytryptamine (serotonin) receptor 2C, G protein-coupled [Source:HGNC Symbol;Acc:HGNC:5295] [ENST00000276198]              |
| A_33_P3345016 | 0,004005227 | down | -2,5235734 | HTR6      | Homo sapiens 5-hydroxytryptamine (serotonin) receptor 6, G protein-coupled (HTR6), mRNA [NM_000871]                              |
| A_33_P3402983 | 0,009742701 | down | -1,5278882 | HYDIN     | Homo sapiens HYDIN, axonemal central pair apparatus protein (HYDIN), transcript variant 1, mRNA [NM_001270974]                   |
| A_33_P3276856 | 1,56E-05    | down | -2,86866   | HYDIN     | Homo sapiens HYDIN, axonemal central pair apparatus protein (HYDIN), transcript variant 3, mRNA [NM_001198542]                   |
| A_33_P3343010 | 0,001765987 | down | -2,9950593 | HYPK      | huntingtin interacting protein K [Source:HGNC Symbol;Acc:HGNC:18418] [ENST00000620261]                                           |
| A_24_P281872  | 0,04829999  | down | -1,9377159 | HYPM      | Homo sapiens huntingtin interacting protein M (HYPM), mRNA [NM_012274]                                                           |
| A_23_P144549  | 0,015709674 | down | -1,7027826 | IBSP      | Homo sapiens integrin-binding sialoprotein (IBSP), mRNA [NM_004967]                                                              |
| A_24_P12690   | 0,04858266  | down | -1,765571  | IDO2      | Homo sapiens indoleamine 2,3-dioxygenase 2 (IDO2), mRNA [NM_194294]                                                              |
| A_23_P151294  | 0,021711312 | down | -1,5524135 | IFNG      | Homo sapiens interferon, gamma (IFNG), mRNA [NM_000619]                                                                          |
| A_33_P3234020 | 0,002116963 | down | -2,629176  | IGDCC3    | Homo sapiens immunoglobulin superfamily, DCC subclass, member 3 (IGDCC3), mRNA [NM_004884]                                       |
| A_23_P116435  | 0,014167596 | down | -2,0407908 | IGF2-AS   | Homo sapiens IGF2 antisense RNA (IGF2-AS), transcript variant 1, long non-coding RNA [NR_028044]                                 |
| A_33_P3312819 | 0,007605148 | down | -2,091783  | IGF2-AS   | Homo sapiens IGF2 antisense RNA (IGF2-AS), transcript variant 1, long non-coding RNA [NR_028044]                                 |
| A_33_P3243486 | 0,021501858 | down | -1,9799732 | IGFL4     | Homo sapiens IGF-like family member 4 (IGFL4), mRNA [NM_001002923]                                                               |
| A_33_P3761915 | 0,035674144 | down | -1,8249285 | IGKV1D-13 | 602502772F1 NIH_MGC_77 Homo sapiens cDNA clone IMAGE:4616320 5', mRNA sequence [BG482625]                                        |
| A_23_P333683  | 0,009766041 | down | -2,1946976 | IGSF10    | Homo sapiens immunoglobulin superfamily, member 10 (IGSF10), transcript variant 1, mRNA [NM_178822]                              |
| A_23_P376060  | 0,020424858 | down | -1,7723099 | IKZF3     | Homo sapiens IKAROS family zinc finger 3 (Aiolos) (IKZF3), transcript variant 1, mRNA [NM_012481]                                |
| A_23_P167479  | 0,037269745 | down | -1,8862203 | IL17B     | Homo sapiens interleukin 17B (IL17B), mRNA [NM_014443]                                                                           |
| A_23_P35092   | 0,002405184 | down | -1,8314921 | IL19      | Homo sapiens interleukin 19 (IL19), transcript variant 1, mRNA [NM_153758]                                                       |
| A_23_P56604   | 0,022398826 | down | -1,5287845 | IL1RL2    | Homo sapiens interleukin 1 receptor-like 2 (IL1RL2), mRNA [NM_003854]                                                            |
| A_33_P3422124 | 0,01851935  | down | -2,0862327 | IL22RA2   | Homo sapiens interleukin 22 receptor, alpha 2 (IL22RA2), transcript variant 3, mRNA [NM_181310]                                  |
| A_33_P3295917 | 0,02525328  | down | -2,2710023 | IL7       | interleukin 7 [Source:HGNC Symbol;Acc:HGNC:6023] [ENST00000518982]                                                               |
| A_33_P3734378 | 0,037677806 | up   | 1,6150934  | INHBA-AS1 | Homo sapiens INHBA antisense RNA 1 (INHBA-AS1), transcript variant 1, long non-coding RNA [NR_027118]                            |
| A_24_P155502  | 0,013609498 | down | -2,3382971 | INHBC     | Homo sapiens inhibin, beta C (INHBC), mRNA [NM_005538]                                                                           |
| A_23_P1981    | 0,004859632 | down | -2,212384  | INS       | Homo sapiens insulin (INS), transcript variant 1, mRNA [NM_000207]                                                               |
| A_23_P112220  | 0,008226439 | down | -1,5063162 | INSL4     | Homo sapiens insulin-like 4 (placenta) (INSL4), mRNA [NM_002195]                                                                 |
| A_21_P0014041 | 0,014197269 | up   | 1,7122842  | IPO13     | PREDICTED: Homo sapiens importin 13 (IPO13), mRNA [XM_003846624]                                                                 |
| A_32_P13756   | 0,010204908 | down | -1,6868024 | IQCF6     | Homo sapiens IQ motif containing F6 (IQCF6), mRNA [NM_001143833]                                                                 |
| A_24_P275585  | 0,021433104 | down | -1,5442313 | IQCH      | Homo sapiens IQ motif containing H (IQCH), transcript variant 1, mRNA [NM_001031715]                                             |
| A_33_P3343120 | 0,047475763 | down | -1,6006099 | IRF8      | Homo sapiens interferon regulatory factor 8 (IRF8), mRNA [NM_002163]                                                             |
| A_23_P85039   | 0,006505657 | down | -1,6968335 | IRS4      | Homo sapiens insulin receptor substrate 4 (IRS4), mRNA [NM_003604]                                                               |
| A_23_P3312    | 0,005662673 | down | -2,3090434 | ISLR      | Homo sapiens immunoglobulin superfamily containing leucine-rich repeat (ISLR), transcript variant 1, mRNA [NM_005545]            |
| A_21_P0000848 | 0,041238997 | down | -1,615331  | ISPD-AS1  | Homo sapiens ISPD antisense RNA 1 (ISPD-AS1), transcript variant 1, long non-coding RNA [NR_038946]                              |
| A_33_P3316115 | 0,011325472 | down | -1,8391839 | ITFG1-AS1 | Homo sapiens ITFG1 antisense RNA 1 (ITFG1-AS1), transcript variant 1, long non-coding RNA [NR_110903]                            |
| A_23_P354151  | 0,032291017 | down | -1,636231  | ITK       | Homo sapiens IL2-inducible T-cell kinase (ITK), mRNA [NM_005546]                                                                 |
| A_33_P3239614 | 0,003455637 | down | -2,602169  | IYD       | Homo sapiens iodotyrosine deiodinase (IYD), transcript variant 2, mRNA [NM_203395]                                               |
| A_33_P3352088 | 0,020647027 | down | -2,0071373 | JAKMIP3   | Homo sapiens Janus kinase and microtubule interacting protein 3 (JAKMIP3), mRNA [NM_001105521]                                   |
| A_33_P3249976 | 0,003087562 | down | -2,360399  | JAM2      | Homo sapiens junctional adhesion molecule 2 (JAM2), transcript variant 1, mRNA [NM_021219]                                       |
| A_23_P68423   | 0,04000083  | down | -2,1109946 | JPH2      | Homo sapiens junctionophilin 2 (JPH2), transcript variant 2, mRNA [NM_175913]                                                    |
| A_33_P3394252 | 0,002462881 | up   | 2,1443913  | KANSL1L   | Homo sapiens KAT8 regulatory NSL complex subunit 1-like (KANSL1L), mRNA [NM_152519]                                              |
| A_21_P0014696 | 0,026084138 | down | -2,1703508 | KATNAL2   | PREDICTED: Homo sapiens katanin p60 subunit A-like 2 (KATNAL2), transcript variant X6, mRNA [XM_006722554]                       |

|               |             |      |            |            |                                                                                                                                       |
|---------------|-------------|------|------------|------------|---------------------------------------------------------------------------------------------------------------------------------------|
| A_33_P3396129 | 0,001627864 | down | -2,174469  | KATNB1     | katanin p80 (WD repeat containing) subunit B 1 [Source:HGNC Symbol;Acc:HGNC:6217] [ENST00000566611]                                   |
| A_33_P3214061 | 0,007263868 | down | -1,6704192 | KATNB1P6   | Homo sapiens katanin p80 subunit B-like 1 pseudogene 6 (KATNB1P6), non-coding RNA [NR_003954]                                         |
| A_23_P126528  | 0,02976564  | down | -2,3561606 | KCNA10     | Homo sapiens potassium channel, voltage gated shaker related subfamily A, member 10 (KCNA10), mRNA [NM_005549]                        |
| A_23_P417173  | 0,038633503 | down | -1,7254565 | KCNA5      | Homo sapiens potassium channel, voltage gated shaker related subfamily A, member 5 (KCNA5), mRNA [NM_002234]                          |
| A_33_P3415012 | 0,018916216 | down | -2,1078854 | KCNA6      | Homo sapiens potassium channel, voltage gated shaker related subfamily A, member 6 (KCNA6), mRNA [NM_002235]                          |
| A_24_P31627   | 0,018577732 | down | -1,5557013 | KCNB1      | Homo sapiens potassium channel, voltage gated Shab related subfamily B, member 1 (KCNB1), mRNA [NM_004975]                            |
| A_33_P3375766 | 0,019758724 | down | -1,9204632 | KCNC2      | Homo sapiens potassium channel, voltage gated Shaw related subfamily C, member 2 (KCNC2), transcript variant 3, mRNA [NM_15:          |
| A_23_P24948   | 0,012424674 | down | -1,6533204 | KCNE3      | Homo sapiens potassium channel, voltage gated subfamily E regulatory beta subunit 3 (KCNE3), mRNA [NM_005472]                         |
| A_23_P256641  | 0,027132004 | down | -1,7334518 | KCNE5      | Homo sapiens potassium channel, voltage gated subfamily E regulatory beta subunit 5 (KCNE5), mRNA [NM_012282]                         |
| A_23_P168403  | 0,014747651 | down | -1,5590942 | KCNH2      | Homo sapiens potassium voltage-gated channel, subfamily H (eag-related), member 2 (KCNH2), transcript variant 1, mRNA [NM_00:         |
| A_23_P377882  | 0,029400332 | down | -2,4876564 | KCNH2      | Homo sapiens potassium voltage-gated channel, subfamily H (eag-related), member 2 (KCNH2), transcript variant 2, mRNA [NM_17:         |
| A_33_P3352906 | 0,011806937 | down | -2,4861965 | KCNIP4-IT1 | Homo sapiens KCNIP4 intronic transcript 1 (non-protein coding) (KCNIP4-IT1), long non-coding RNA [NR_002813]                          |
| A_23_P501193  | 0,036005966 | down | -1,5049622 | KCNJ16     | Homo sapiens potassium channel, inwardly rectifying subfamily J, member 16 (KCNJ16), transcript variant 2, mRNA [NM_170741]           |
| A_23_P64879   | 0,04161025  | down | -1,5252799 | KCNJ8      | Homo sapiens potassium channel, inwardly rectifying subfamily J, member 8 (KCNJ8), mRNA [NM_004982]                                   |
| A_23_P65629   | 0,030017061 | down | -1,5310405 | KCNK10     | Homo sapiens potassium channel, two pore domain subfamily K, member 10 (KCNK10), transcript variant 1, mRNA [NM_021161]               |
| A_33_P3278789 | 0,042921234 | down | -2,1384544 | KCNK16     | Homo sapiens potassium channel, two pore domain subfamily K, member 16 (KCNK16), transcript variant 3, mRNA [NM_001135106]            |
| A_23_P319423  | 0,001031155 | down | -3,493477  | KCNK5      | Homo sapiens potassium channel, two pore domain subfamily K, member 5 (KCNK5), mRNA [NM_003740]                                       |
| A_23_P111978  | 0,026515633 | down | -2,6335762 | KCNK9      | Homo sapiens potassium channel, two pore domain subfamily K, member 9 (KCNK9), transcript variant 1, mRNA [NM_001282534]              |
| A_21_P0012333 | 0,002524239 | down | -1,7794586 | KCNMB3     | Homo sapiens potassium channel subfamily M regulatory beta subunit 3 (KCNMB3), transcript variant 2, mRNA [NM_171829]                 |
| A_23_P34424   | 0,012569945 | down | -3,5274222 | KCNQ4      | Homo sapiens potassium channel, voltage gated KQT-like subfamily Q, member 4 (KCNQ4), transcript variant 1, mRNA [NM_004700]          |
| A_33_P3243008 | 0,003794023 | down | -2,5622954 | KCNU1      | Homo sapiens potassium channel, subfamily U, member 1 (KCNU1), mRNA [NM_001031836]                                                    |
| A_23_P94902   | 0,020633692 | down | -1,8646433 | KCTD8      | Homo sapiens potassium channel tetramerization domain containing 8 (KCTD8), mRNA [NM_198353]                                          |
| A_23_P386442  | 0,031378444 | down | -1,5431198 | KIAA0087   | Homo sapiens KIAA0087 (KIAA0087), long non-coding RNA [NR_022006]                                                                     |
| A_21_P0012955 | 0,014261086 | down | -1,5745742 | KIAA1024L  | Homo sapiens KIAA1024-like (KIAA1024L), mRNA [NM_001257308]                                                                           |
| A_24_P600377  | 0,016548693 | down | -2,2791271 | KIAA1024L  | Homo sapiens KIAA1024-like (KIAA1024L), mRNA [NM_001257308]                                                                           |
| A_33_P3396746 | 0,014812454 | down | -1,6421765 | KIF26B     | kinesin family member 26B [Source:HGNC Symbol;Acc:HGNC:25484] [ENST00000479506]                                                       |
| A_23_P218025  | 0,025891636 | down | -1,8120186 | KIF5A      | Homo sapiens kinesin family member 5A (KIF5A), mRNA [NM_004984]                                                                       |
| A_32_P154473  | 0,043823462 | down | -1,6224418 | KIF5C      | Homo sapiens kinesin family member 5C (KIF5C), transcript variant 1, mRNA [NM_004522]                                                 |
| A_24_P297816  | 0,021040173 | down | -1,5233433 | KIF6       | Homo sapiens kinesin family member 6 (KIF6), transcript variant 1, mRNA [NM_145027]                                                   |
| A_24_P350622  | 0,021689557 | down | -2,5401216 | KIR2DL4    | Homo sapiens killer cell immunoglobulin-like receptor, two domains, long cytoplasmic tail, 4 (KIR2DL4), transcript variant 1, mRNA [N |
| A_24_P117147  | 0,005054997 | down | -2,8706326 | KIR3DL1    | Homo sapiens killer cell immunoglobulin-like receptor, three domains, long cytoplasmic tail, 1 (KIR3DL1), mRNA [NM_013289]            |
| A_33_P3407034 | 0,025277419 | down | -1,8000169 | KIT        | Homo sapiens v-kit Hardy-Zuckerman 4 feline sarcoma viral oncogene homolog (KIT), transcript variant 1, mRNA [NM_000222]              |
| A_23_P139654  | 0,008360908 | down | -2,1316981 | KLRC1      | Homo sapiens killer cell lectin-like receptor subfamily C, member 1 (KLRC1), transcript variant 2, mRNA [NM_007328]                   |
| A_23_P218058  | 0,023808677 | down | -2,2714703 | KLRC4      | Homo sapiens killer cell lectin-like receptor subfamily C, member 4 (KLRC4), mRNA [NM_013431]                                         |
| A_23_P66854   | 0,04591667  | down | -1,841054  | KRT20      | Homo sapiens keratin 20, type I (KRT20), mRNA [NM_019010]                                                                             |
| A_21_P0000016 | 0,025162458 | down | -1,5859189 | KRT72      | Homo sapiens keratin 72, type II (KRT72), transcript variant 2, mRNA [NM_001146225]                                                   |
| A_33_P3249274 | 0,004156508 | down | -1,6956166 | KRT73-AS1  | Homo sapiens KRT73 antisense RNA 1 (KRT73-AS1), long non-coding RNA [NR_126005]                                                       |
| A_23_P130241  | 0,027745107 | down | -1,7036868 | KRTAP1-3   | Homo sapiens keratin associated protein 1-3 (KRTAP1-3), mRNA [NM_030966]                                                              |
| A_33_P3334877 | 0,014509118 | down | -1,8587502 | KRTAP10-4  | Homo sapiens keratin associated protein 10-4 (KRTAP10-4), mRNA [NM_198687]                                                            |
| A_33_P3293760 | 0,043526623 | down | -1,6800654 | KRTAP10-8  | Homo sapiens keratin associated protein 10-8 (KRTAP10-8), mRNA [NM_198695]                                                            |
| A_33_P3354399 | 0,007530211 | down | -2,2296572 | KRTAP12-3  | Homo sapiens keratin associated protein 12-3 (KRTAP12-3), mRNA [NM_198697]                                                            |
| A_24_P314534  | 0,006929359 | down | -2,5464656 | KRTAP13-2  | Homo sapiens keratin associated protein 13-2 (KRTAP13-2), mRNA [NM_181621]                                                            |
| A_24_P357386  | 0,02522473  | down | -1,9479643 | KRTAP13-3  | Homo sapiens keratin associated protein 13-3 (KRTAP13-3), mRNA [NM_181622]                                                            |
| A_24_P348845  | 0,034238644 | down | -1,5535786 | KRTAP15-1  | Homo sapiens keratin associated protein 15-1 (KRTAP15-1), mRNA [NM_181623]                                                            |
| A_33_P3311258 | 0,039156202 | down | -1,668654  | KRTAP19-4  | Homo sapiens keratin associated protein 19-4 (KRTAP19-4), mRNA [NM_181610]                                                            |
| A_33_P3263935 | 0,04657903  | down | -1,5338427 | KRTAP22-2  | Homo sapiens keratin associated protein 22-2 (KRTAP22-2), mRNA [NM_001164434]                                                         |
| A_33_P3635527 | 0,007063348 | down | -1,5939873 | KRTAP24-1  | Homo sapiens keratin associated protein 24-1 (KRTAP24-1), mRNA [NM_001085455]                                                         |
| A_33_P3306619 | 0,00388131  | down | -2,5663044 | KRTAP25-1  | Homo sapiens keratin associated protein 25-1 (KRTAP25-1), mRNA [NM_001128598]                                                         |
| A_33_P3382399 | 0,019608565 | down | -1,8537794 | KRTAP3-1   | Homo sapiens keratin associated protein 3-1 (KRTAP3-1), mRNA [NM_031958]                                                              |

|                |             |      |            |             |                                                                                                                                   |
|----------------|-------------|------|------------|-------------|-----------------------------------------------------------------------------------------------------------------------------------|
| A_33_P3245348  | 0,042631235 | down | -1,6363318 | KRTAP4-1    | Homo sapiens keratin associated protein 4-1 (KRTAP4-1), mRNA [NM_033060]                                                          |
| A_23_P66844    | 0,030058116 | down | -1,5933099 | KRTAP4-7    | Homo sapiens keratin associated protein 4-7 (KRTAP4-7), mRNA [NM_033061]                                                          |
| A_33_P3304691  | 0,019832622 | down | -2,4583423 | KRTAP5-1    | Homo sapiens keratin associated protein 5-1 (KRTAP5-1), mRNA [NM_001005922]                                                       |
| A_33_P3229472  | 0,02375219  | down | -2,0219884 | KRTAP5-10   | Homo sapiens keratin associated protein 5-10 (KRTAP5-10), mRNA [NM_001012710]                                                     |
| A_24_P400130   | 0,032737307 | down | -1,6066586 | KRTAP7-1    | Homo sapiens keratin associated protein 7-1 (gene/pseudogene) (KRTAP7-1), mRNA [NM_181606]                                        |
| A_33_P3404123  | 0,047075003 | down | -2,0333507 | KRTAP9-7    | Homo sapiens keratin associated protein 9-7 (KRTAP9-7), mRNA [NM_001277332]                                                       |
| A_33_P3292164  | 0,001767325 | down | -3,2989824 | KRTAP9-7    | Homo sapiens keratin associated protein 9-7 (KRTAP9-7), mRNA [NM_001277332]                                                       |
| A_32_P216635   | 0,025187433 | down | -1,8526232 | KSR2        | Homo sapiens kinase suppressor of ras 2 (KSR2), mRNA [NM_173598]                                                                  |
| A_33_P3412493  | 0,01686806  | down | -1,6489053 | KY          | kyphoscoliosis peptidase [Source:HGNC Symbol;Acc:HGNC:26576] [ENST00000506319]                                                    |
| A_33_P3355230  | 0,008185254 | down | -2,241749  | LAIR1       | Homo sapiens leukocyte-associated immunoglobulin-like receptor 1 (LAIR1), transcript variant a, mRNA [NM_002287]                  |
| A_23_P120227   | 0,03560222  | up   | 1,7144676  | LBH         | Homo sapiens limb bud and heart development (LBH), mRNA [NM_030915]                                                               |
| A_33_P3302125  | 0,046494123 | down | -2,247747  | LCE2A       | Homo sapiens late cornified envelope 2A (LCE2A), mRNA [NM_178428]                                                                 |
| A_24_P207828   | 0,008816589 | down | -2,2170775 | LCE2B       | Homo sapiens late cornified envelope 2B (LCE2B), mRNA [NM_014357]                                                                 |
| A_23_P32115    | 0,004413821 | down | -1,745348  | LCN12       | Homo sapiens lipocalin 12 (LCN12), mRNA [NM_178536]                                                                               |
| A_33_P3357678  | 0,02369719  | down | -1,5485321 | LCTL        | Homo sapiens lactase-like (LCTL), transcript variant 1, mRNA [NM_207338]                                                          |
| A_23_P125253   | 0,031528335 | down | -1,9757904 | LDB2        | LIM domain binding 2 [Source:HGNC Symbol;Acc:HGNC:6533] [ENST00000509803]                                                         |
| A_23_P54357    | 0,012811312 | down | -1,764326  | LDHAL6B     | Homo sapiens lactate dehydrogenase A-like 6B (LDHAL6B), mRNA [NM_033195]                                                          |
| A_21_P0000886  | 0,029880458 | down | -2,7892067 | LDLRAD4-AS1 | Homo sapiens LDLRAD4 antisense RNA 1 (LDLRAD4-AS1), long non-coding RNA [NR_040031]                                               |
| A_24_P213788   | 0,029186301 | down | -1,6411464 | LEF1-AS1    | Homo sapiens LEF1 antisense RNA 1 (LEF1-AS1), transcript variant 1, long non-coding RNA [NR_029373]                               |
| A_23_P5031     | 0,004856758 | down | -2,1486547 | LGALS13     | Homo sapiens lectin, galactoside-binding, soluble, 13 (LGALS13), mRNA [NM_013268]                                                 |
| A_23_P153662   | 0,023752682 | down | -2,0830572 | LGALS14     | Homo sapiens lectin, galactoside-binding, soluble, 14 (LGALS14), transcript variant 2, mRNA [NM_203471]                           |
| A_33_P3393655  | 0,01835152  | down | -2,0721805 | LGI2        | Homo sapiens leucine-rich repeat LGI family, member 2 (LGI2), mRNA [NM_018176]                                                    |
| A_23_P93169    | 0,022633133 | down | -1,5956634 | LGSN        | Homo sapiens lengsin, lens protein with glutamine synthetase domain (LGSN), transcript variant 1, mRNA [NM_016571]                |
| A_33_P3315959  | 0,015295078 | down | -1,6939301 | LGSN        | Homo sapiens lengsin, lens protein with glutamine synthetase domain (LGSN), transcript variant 1, mRNA [NM_016571]                |
| A_33_P3266769  | 0,029083842 | down | -1,6246543 | LHCGR       | luteinizing hormone/choriogonadotropin receptor [Source:HGNC Symbol;Acc:HGNC:6585] [ENST00000477576]                              |
| A_23_P32165    | 0,003005201 | down | -2,0424867 | LHX2        | Homo sapiens LIM homeobox 2 (LHX2), mRNA [NM_004789]                                                                              |
| A_33_P3339246  | 0,013194697 | down | -1,8058815 | LHX8        | Homo sapiens LIM homeobox 8 (LHX8), transcript variant 1, mRNA [NM_001001933]                                                     |
| A_23_P327562   | 0,018744908 | down | -1,7599863 | LHX9        | Homo sapiens LIM homeobox 9 (LHX9), transcript variant 1, mRNA [NM_020204]                                                        |
| A_23_P90497    | 0,030422596 | down | -1,6590503 | LILRA4      | Homo sapiens leukocyte immunoglobulin-like receptor, subfamily A (with TM domain), member 4 (LILRA4), mRNA [NM_012276]            |
| A_33_P3397599  | 0,02240254  | down | -1,5443267 | LILRA6      | Homo sapiens leukocyte immunoglobulin-like receptor, subfamily A (with TM domain), member 6 (LILRA6), transcript variant 2, non-c |
| A_19_P00808088 | 0,01331415  | down | -2,1073465 | LMCD1-AS1   | Homo sapiens LMCD1 antisense RNA 1 (head to head) (LMCD1-AS1), long non-coding RNA [NR_033378]                                    |
| A_21_P0000009  | 0,012701068 | down | -1,7340429 | LMNTD1      | Homo sapiens lamin tail domain containing 1 (LMNTD1), transcript variant 4, mRNA [NM_001145729]                                   |
| A_23_P87310    | 0,02378552  | down | -1,9068073 | LMO1        | Homo sapiens LIM domain only 1 (rhombotin 1) (LMO1), transcript variant 1, mRNA [NM_002315]                                       |
| A_33_P3295261  | 0,02405326  | down | -2,0753076 | LMOD1       | Homo sapiens leiomodion 1 (smooth muscle) (LMOD1), mRNA [NM_012134]                                                               |
| A_21_P0013116  | 0,03655672  | down | -2,2979639 | LPAL2       | Homo sapiens lipoprotein, Lp(a)-like 2, pseudogene (LPAL2), transcript variant 2, non-coding RNA [NR_028093]                      |
| A_23_P10980    | 0,021006359 | down | -1,6632141 | LPHN3       | Homo sapiens latrophilin 3 (LPHN3), mRNA [NM_015236]                                                                              |
| A_33_P3384958  | 0,046123818 | down | -1,7408122 | LPPR4       | Homo sapiens lipid phosphate phosphatase-related protein type 4 (LPPR4), transcript variant 1, mRNA [NM_014839]                   |
| A_33_P3313215  | 0,032946598 | down | -1,5020438 | LRIT2       | Homo sapiens leucine-rich repeat, immunoglobulin-like and transmembrane domains 2 (LRIT2), transcript variant 1, mRNA [NM_001     |
| A_33_P3253538  | 0,033262815 | down | -1,6693532 | LRRC14B     | Homo sapiens leucine rich repeat containing 14B (LRRC14B), mRNA [NM_001080478]                                                    |
| A_24_P827037   | 0,04940006  | down | -1,5716008 | LRRC15      | Homo sapiens leucine rich repeat containing 15 (LRRC15), transcript variant 2, mRNA [NM_130830]                                   |
| A_33_P3329522  | 0,035971925 | down | -1,8807086 | LRRC17      | Homo sapiens leucine rich repeat containing 17 (LRRC17), transcript variant 1, mRNA [NM_001031692]                                |
| A_33_P3325763  | 0,03961499  | down | -1,8114413 | LRRC3       | leucine rich repeat containing 3 [Source:HGNC Symbol;Acc:HGNC:14965] [ENST00000291592]                                            |
| A_33_P3412013  | 0,02789616  | down | -1,8558396 | LRRC37A5P   | Homo sapiens leucine rich repeat containing 37, member A5, pseudogene (LRRC37A5P), long non-coding RNA [NR_034087]                |
| A_23_P103877   | 0,025501208 | down | -1,5451796 | LRRC38      | Homo sapiens leucine rich repeat containing 38 (LRRC38), mRNA [NM_001010847]                                                      |
| A_33_P3228739  | 0,030499687 | down | -1,6381553 | LRRC3C      | Homo sapiens leucine rich repeat containing 3C (LRRC3C), mRNA [NM_001195545]                                                      |
| A_33_P3263212  | 0,03668526  | down | -1,5966007 | LRRC7       | Homo sapiens leucine rich repeat containing 7 (LRRC7), mRNA [NM_020794]                                                           |
| A_32_P222149   | 0,01813859  | down | -2,1223886 | LRRC72      | Homo sapiens leucine rich repeat containing 72 (LRRC72), mRNA [NM_001195280]                                                      |
| A_33_P3471466  | 0,024049615 | down | -1,8462199 | LRRC74A     | Homo sapiens leucine rich repeat containing 74A (LRRC74A), mRNA [NM_194287]                                                       |
| A_21_P0011248  | 0,013530348 | down | -1,540009  | LRRC9       | Homo sapiens leucine rich repeat containing 9 (LRRC9), non-coding RNA [NR_075071]                                                 |



|                |             |      |            |             |                                                                                                                                      |
|----------------|-------------|------|------------|-------------|--------------------------------------------------------------------------------------------------------------------------------------|
| A_33_P3228082  | 0,028227016 | down | -1,755979  | LRRRC9      | Homo sapiens leucine rich repeat containing 9 (LRRRC9), non-coding RNA [NR_075071]                                                   |
| A_33_P3333762  | 0,010576146 | down | -2,3159719 | LRRRIQ4     | Homo sapiens leucine-rich repeats and IQ motif containing 4 (LRRRIQ4), mRNA [NM_001080460]                                           |
| A_33_P3369058  | 0,025662275 | down | -2,1408231 | LRRK2       | Homo sapiens leucine-rich repeat kinase 2 (LRRK2), mRNA [NM_198578]                                                                  |
| A_33_P3251024  | 0,003865806 | down | -2,1450882 | LRRTM2      | Homo sapiens leucine rich repeat transmembrane neuronal 2 (LRRTM2), mRNA [NM_015564]                                                 |
| A_24_P295465   | 0,04664632  | down | -1,7114917 | LRRTM3      | Homo sapiens leucine rich repeat transmembrane neuronal 3 (LRRTM3), transcript variant 1, mRNA [NM_178011]                           |
| A_21_P0004421  | 0,001957095 | down | -3,0867379 | LUCAT1      | Homo sapiens lung cancer associated transcript 1 (non-protein coding) (LUCAT1), transcript variant 1, long non-coding RNA [NR_10]    |
| A_33_P3410232  | 0,00843408  | down | -2,8161294 | LY6G6E      | Homo sapiens lymphocyte antigen 6 complex, locus G6E (pseudogene) (LY6G6E), transcript variant 1, non-coding RNA [NR_02454]          |
| A_32_P178758   | 0,01623019  | down | -1,6708554 | LY86-AS1    | Homo sapiens LY86 antisense RNA 1 (LY86-AS1), long non-coding RNA [NR_026970]                                                        |
| A_24_P164998   | 0,04618982  | down | -1,8268793 | LYPD8       | Homo sapiens LY6/PLAUR domain containing 8 (LYPD8), transcript variant 1, mRNA [NM_001085474]                                        |
| A_21_P0010798  | 0,03150783  | down | -2,3285651 | LYPD8       | LY6/PLAUR domain containing 8 [Source:HGNC Symbol;Acc:HGNC:44208] [ENST00000566597]                                                  |
| A_33_P3312611  | 0,02163946  | down | -1,5357232 | LYPLAL1-AS1 | Homo sapiens LYPLAL1 antisense RNA 1 (head to head) (LYPLAL1-AS1), long non-coding RNA [NR_038845]                                   |
| A_33_P3288484  | 0,019724475 | down | -1,6927693 | LYRM2       | Homo sapiens LYR motif containing 2 (LYRM2), transcript variant 1, mRNA [NM_020466]                                                  |
| A_23_P130056   | 0,044759832 | down | -1,668994  | LYZL6       | Homo sapiens lysozyme-like 6 (LYZL6), transcript variant 2, mRNA [NM_020426]                                                         |
| A_32_P55871    | 4,34E-04    | down | -2,0672731 | MAATS1      | Homo sapiens MYCBP-associated, testis expressed 1 (MAATS1), mRNA [NM_033364]                                                         |
| A_23_P53884    | 0,011463768 | down | -1,8319464 | MAB21L1     | Homo sapiens mab-21-like 1 (C. elegans) (MAB21L1), mRNA [NM_005584]                                                                  |
| A_33_P3359250  | 0,009580674 | down | -1,8293854 | MAD2L2      | MAD2 mitotic arrest deficient-like 2 (yeast) [Source:HGNC Symbol;Acc:HGNC:6764] [ENST00000376664]                                    |
| A_33_P3406828  | 0,043331243 | down | -1,6847068 | MAFIP       | Homo sapiens MAFF interacting protein (pseudogene) (MAFIP), transcript variant 1, non-coding RNA [NR_046439]                         |
| A_23_P136870   | 0,038517393 | down | -1,838736  | MAGEA6      | Homo sapiens melanoma antigen family A, 6 (MAGEA6), transcript variant 2, mRNA [NM_175868]                                           |
| A_23_P96432    | 0,024737077 | down | -1,5041717 | MAGEB3      | Homo sapiens melanoma antigen family B, 3 (MAGEB3), mRNA [NM_002365]                                                                 |
| A_33_P3365860  | 0,009986353 | down | -2,5970807 | MAGEB5      | Homo sapiens melanoma antigen family B, 5 (MAGEB5), mRNA [NM_001271752]                                                              |
| A_23_P502081   | 0,025154505 | down | -2,347159  | MAGEC3      | Homo sapiens melanoma antigen family C, 3 (MAGEC3), transcript variant 1, mRNA [NM_138702]                                           |
| A_24_P330112   | 0,040388357 | up   | 1,5208633  | MAGOHB      | Homo sapiens mago-nashi homolog B (Drosophila) (MAGOHB), transcript variant 1, mRNA [NM_018048]                                      |
| A_21_P0010808  | 0,01438448  | down | -1,7226753 | MALRD1      | Homo sapiens MAM and LDL receptor class A domain containing 1 (MALRD1), mRNA [NM_001142308]                                          |
| A_23_P308483   | 0,00961127  | down | -1,8202497 | MAP3K15     | Homo sapiens mitogen-activated protein kinase kinase kinase 15 (MAP3K15), mRNA [NM_001001671]                                        |
| A_33_P3226835  | 0,015095647 | down | -1,5610665 | MAP3K19     | Homo sapiens mitogen-activated protein kinase kinase kinase 19 (MAP3K19), transcript variant 1, mRNA [NM_025052]                     |
| A_23_P5002     | 0,016190061 | down | -1,9600558 | MAP4K1      | Homo sapiens mitogen-activated protein kinase kinase kinase kinase 1 (MAP4K1), transcript variant 1, mRNA [NM_001042600]             |
| A_24_P33508    | 0,03066948  | down | -1,90427   | MARCH11     | Homo sapiens membrane-associated ring finger (C3HC4) 11 (MARCH11), mRNA [NM_001102562]                                               |
| A_24_P555473   | 0,003589794 | down | -1,7051879 | MARCH3      | Homo sapiens membrane-associated ring finger (C3HC4) 3, E3 ubiquitin protein ligase (MARCH3), mRNA [NM_178450]                       |
| A_23_P310      | 0,036913984 | up   | 1,7013352  | MARCKSL1    | Homo sapiens MARCKS-like 1 (MARCKSL1), transcript variant 1, mRNA [NM_023009]                                                        |
| A_33_P3327010  | 0,018821258 | down | -1,906458  | MAST2       | Homo sapiens microtubule associated serine/threonine kinase 2 (MAST2), mRNA [NM_015112]                                              |
| A_23_P35529    | 0,016076481 | down | -1,7424669 | MBL2        | Homo sapiens mannose-binding lectin (protein C) 2, soluble (MBL2), mRNA [NM_000242]                                                  |
| A_23_P50039    | 0,024530353 | down | -2,340947  | MC5R        | Homo sapiens melanocortin 5 receptor (MC5R), mRNA [NM_005913]                                                                        |
| A_24_P98006    | 0,012918294 | down | -1,5489992 | MCHR2       | Homo sapiens melanin-concentrating hormone receptor 2 (MCHR2), transcript variant 1, mRNA [NM_001040179]                             |
| A_33_P3421867  | 0,025253518 | down | -1,9638449 | MDGA1       | MAM domain containing glycosylphosphatidylinositol anchor 1 [Source:HGNC Symbol;Acc:HGNC:19267] [ENST00000373401]                    |
| A_24_P106624   | 0,03683387  | down | -1,5203565 | MEOX2       | Homo sapiens mesenchyme homeobox 2 (MEOX2), mRNA [NM_005924]                                                                         |
| A_33_P3418877  | 0,03303317  | down | -1,8649106 | MESTIT1     | Homo sapiens MEST intronic transcript 1, antisense RNA (MESTIT1), long non-coding RNA [NR_004382]                                    |
| A_24_P64653    | 0,039237116 | down | -2,3458757 | METTL7B     | Homo sapiens methyltransferase like 7B (METTL7B), mRNA [NM_152637]                                                                   |
| A_23_P10062    | 0,018048776 | down | -1,7168759 | MGAT4C      | Homo sapiens MGAT4 family, member C (MGAT4C), mRNA [NM_013244]                                                                       |
| A_21_P0000533  | 0,036055263 | down | -1,6930189 | MGC27382    | Homo sapiens uncharacterized MGC27382 (MGC27382), long non-coding RNA [NR_027310]                                                    |
| A_19_P00322705 | 0,014285381 | down | -1,8138497 | MIAT        | Homo sapiens myocardial infarction associated transcript (non-protein coding) (MIAT), transcript variant 1, long non-coding RNA [NR] |
| A_19_P00315524 | 0,014834112 | down | -1,8691691 | MIAT        | Homo sapiens myocardial infarction associated transcript (non-protein coding) (MIAT), transcript variant 1, long non-coding RNA [NR] |
| A_19_P00321068 | 0,016492907 | down | -1,8953818 | MIAT        | Homo sapiens myocardial infarction associated transcript (non-protein coding) (MIAT), transcript variant 1, long non-coding RNA [NR] |
| A_19_P00319573 | 0,002692486 | down | -2,857709  | MIAT        | myocardial infarction associated transcript (non-protein coding) [Source:HGNC Symbol;Acc:HGNC:33425] [ENST00000418918]               |
| A_21_P0006525  | 0,038374793 | down | -1,5076687 | MID1        | PREDICTED: Homo sapiens midline 1 (Opitz/BBB syndrome) (MID1), transcript variant X2, misc_RNA [XR_247299]                           |
| A_21_P0006407  | 0,030546632 | down | -1,9590634 | MID1        | PREDICTED: Homo sapiens midline 1 (Opitz/BBB syndrome) (MID1), transcript variant X3, misc_RNA [XR_247300]                           |
| A_33_P3341479  | 0,016142607 | down | -2,253803  | MID1IP1-AS1 | Homo sapiens MID1IP1 antisense RNA 1 (MID1IP1-AS1), long non-coding RNA [NR_046706]                                                  |
| A_33_P3230951  | 0,02890488  | down | -2,2230616 | MIMT1       | Homo sapiens MER1 repeat containing imprinted transcript 1 (non-protein coding) (MIMT1), long non-coding RNA [NR_024059]             |
| A_33_P3267612  | 0,01706529  | down | -1,6215658 | MIR143HG    | Homo sapiens MIR143 host gene (non-protein coding) (MIR143HG), transcript variant 1, long non-coding RNA [NR_105059]                 |
| A_19_P00322941 | 0,020048054 | down | -2,4096763 | MIR143HG    | MIR143 host gene (non-protein coding) [Source:HGNC Symbol;Acc:HGNC:42872] [ENST00000518014]                                          |

|               |             |      |            |            |                                                                                                                         |
|---------------|-------------|------|------------|------------|-------------------------------------------------------------------------------------------------------------------------|
| A_21_P0010972 | 0,018481193 | down | -1,5706773 | MIR670HG   | PREDICTED: Homo sapiens MIR670 host gene (non-protein coding) (MIR670HG), transcript variant X1, ncRNA [XR_109044]      |
| A_24_P346855  | 0,02566544  | down | -1,5026174 | MKI67      | Homo sapiens marker of proliferation Ki-67 (MKI67), transcript variant 1, mRNA [NM_002417]                              |
| A_23_P43350   | 0,018209439 | down | -2,549153  | MLANA      | Homo sapiens melan-A (MLANA), mRNA [NM_005511]                                                                          |
| A_33_P3240578 | 0,04776173  | up   | 1,6836269  | MLLT4-AS1  | Homo sapiens MLLT4 antisense RNA 1 (head to head) (MLLT4-AS1), long non-coding RNA [NR_027906]                          |
| A_23_P19529   | 0,025830306 | down | -2,3999329 | MLN        | Homo sapiens motilin (MLN), transcript variant 2, mRNA [NM_001040109]                                                   |
| A_33_P3343260 | 0,019171745 | down | -1,5242124 | MMP25-AS1  | Homo sapiens MMP25 antisense RNA 1 (MMP25-AS1), long non-coding RNA [NR_123723]                                         |
| A_33_P3398316 | 0,032978766 | down | -1,6535074 | MMP27      | Homo sapiens matrix metalloproteinase 27 (MMP27), mRNA [NM_022122]                                                      |
| A_33_P3212257 | 0,04559144  | down | -1,6133904 | MMRN1      | Homo sapiens multimerin 1 (MMRN1), mRNA [NM_007351]                                                                     |
| A_33_P3391439 | 0,03167116  | down | -1,5740826 | MOBP       | Homo sapiens myelin-associated oligodendrocyte basic protein (MOBP), transcript variant 6, non-coding RNA [NR_103505]   |
| A_33_P3350202 | 0,00280205  | down | -1,7730066 | MOCS3      | Homo sapiens molybdenum cofactor synthesis 3 (MOCS3), mRNA [NM_014484]                                                  |
| A_33_P3353866 | 0,03079916  | down | -2,3416293 | MOGAT2     | Homo sapiens monoacylglycerol O-acyltransferase 2 (MOGAT2), mRNA [NM_025098]                                            |
| A_33_P3326984 | 0,026959056 | up   | 1,7924637  | MOK        | MOK protein kinase [Source:HGNC Symbol;Acc:HGNC:9833] [ENST00000520252]                                                 |
| A_33_P3308626 | 0,01815931  | down | -1,6070156 | MON1B      | Homo sapiens MON1 secretory trafficking family member B (MON1B), transcript variant 1, mRNA [NM_014940]                 |
| A_33_P3301221 | 0,0424404   | down | -1,5947183 | MORN1      | Homo sapiens MORN repeat containing 1 (MORN1), transcript variant 3, non-coding RNA [NR_125361]                         |
| A_23_P143774  | 0,009422177 | down | -1,9976432 | MOV10L1    | Homo sapiens Mov10 RISC complex RNA helicase like 1 (MOV10L1), transcript variant 1, mRNA [NM_018995]                   |
| A_33_P3315390 | 0,005439034 | down | -1,6178117 | MPPED2     | Homo sapiens metallophosphoesterase domain containing 2 (MPPED2), transcript variant 2, mRNA [NM_001145399]             |
| A_33_P3368991 | 0,021981671 | down | -1,5019486 | MPZ        | Homo sapiens myelin protein zero (MPZ), mRNA [NM_000530]                                                                |
| A_23_P12746   | 0,017510623 | down | -2,5118883 | MRC1       | Homo sapiens mannose receptor, C type 1 (MRC1), mRNA [NM_002438]                                                        |
| A_24_P315638  | 0,02326975  | down | -2,3199162 | MRGPRE     | Homo sapiens MAS-related GPR, member E (MRGPRE), mRNA [NM_001039165]                                                    |
| A_33_P3414187 | 0,005624386 | down | -1,8189058 | MRGPRX2    | MAS-related GPR, member X2 [Source:HGNC Symbol;Acc:HGNC:17983] [ENST00000329773]                                        |
| A_32_P49309   | 0,012127081 | down | -1,5549365 | MRO        | Homo sapiens maestro (MRO), transcript variant 1, mRNA [NM_031939]                                                      |
| A_23_P4545    | 0,04316003  | down | -2,013822  | MRO        | Homo sapiens maestro (MRO), transcript variant 1, mRNA [NM_031939]                                                      |
| A_21_P0007310 | 0,016397106 | down | -1,9900146 | MRPL23-AS1 | Homo sapiens MRPL23 antisense RNA 1 (MRPL23-AS1), long non-coding RNA [NR_024471]                                       |
| A_33_P3265444 | 0,007131707 | down | -1,9921964 | MRS2P2     | Homo sapiens MRS2 pseudogene 2 (MRS2P2), non-coding RNA [NR_024072]                                                     |
| A_23_P127760  | 0,02509917  | down | -1,8254985 | MS4A12     | Homo sapiens membrane-spanning 4-domains, subfamily A, member 12 (MS4A12), transcript variant 1, mRNA [NM_017716]       |
| A_33_P3386681 | 0,023245169 | down | -1,5094343 | MS4A13     | Homo sapiens membrane-spanning 4-domains, subfamily A, member 13 (MS4A13), transcript variant 1, mRNA [NM_001012417]    |
| A_23_P98565   | 0,009936024 | down | -1,5753117 | MS4A14     | Homo sapiens membrane-spanning 4-domains, subfamily A, member 14 (MS4A14), transcript variant 1, mRNA [NM_032597]       |
| A_33_P3295313 | 2,88E-04    | down | -3,3100839 | MS4A2      | Homo sapiens membrane-spanning 4-domains, subfamily A, member 2 (MS4A2), transcript variant 1, mRNA [NM_000139]         |
| A_23_P75769   | 0,009824608 | down | -2,2440243 | MS4A4A     | Homo sapiens membrane-spanning 4-domains, subfamily A, member 4A (MS4A4A), transcript variant 2, mRNA [NM_024021]       |
| A_33_P3330872 | 0,001458078 | down | -1,969483  | MSL3       | Homo sapiens male-specific lethal 3 homolog (Drosophila) (MSL3), transcript variant 1, mRNA [NM_078629]                 |
| A_32_P361185  | 0,011174598 | up   | 2,106383   | MSS51      | Homo sapiens MSS51 mitochondrial translational activator (MSS51), mRNA [NM_001024593]                                   |
| A_21_P0010518 | 0,025333704 | down | -1,676155  | MST1P2     | Homo sapiens macrophage stimulating 1 (hepatocyte growth factor-like) pseudogene 2 (MST1P2), non-coding RNA [NR_027504] |
| A_21_P0000110 | 0,003094848 | down | -2,1579723 | MTRNR2L10  | Homo sapiens MT-RNR2-like 10 (MTRNR2L10), mRNA [NM_001190708]                                                           |
| A_23_P306610  | 0,026377171 | down | -1,7250291 | MUC17      | Homo sapiens mucin 17, cell surface associated (MUC17), mRNA [NM_001040105]                                             |
| A_21_P0007832 | 0,02856536  | down | -1,8988714 | MUC19      | Homo sapiens mucin 19, oligomeric (MUC19), mRNA [NM_173600]                                                             |
| A_23_P256784  | 0,007262185 | down | -1,6538298 | MUC2       | Homo sapiens mucin 2, oligomeric mucus/gel-forming (MUC2), mRNA [NM_002457]                                             |
| A_21_P0004641 | 0,001457015 | down | -2,7669964 | MUC22      | Homo sapiens mucin 22 (MUC22), mRNA [NM_001198815]                                                                      |
| A_23_P313278  | 0,03299773  | down | -2,2489772 | MUC3A      | Homo sapiens MUC3A mRNA for intestinal mucin, partial cds. [AB038784]                                                   |
| A_33_P3216570 | 6,84E-04    | down | -2,7739484 | MUC5AC     | PREDICTED: Homo sapiens mucin 5AC, oligomeric mucus/gel-forming (MUC5AC), partial mRNA [XM_006709945]                   |
| A_23_P121614  | 0,04446174  | down | -1,8414402 | MUC7       | Homo sapiens mucin 7, secreted (MUC7), transcript variant 3, mRNA [NM_152291]                                           |
| A_23_P71649   | 0,04060037  | down | -1,913628  | MUSK       | Homo sapiens muscle, skeletal, receptor tyrosine kinase (MUSK), transcript variant 1, mRNA [NM_005592]                  |
| A_33_P3354703 | 0,041456167 | down | -1,5524842 | MYADML     | Homo sapiens myeloid-associated differentiation marker-like (pseudogene) (MYADML), non-coding RNA [NR_003143]           |
| A_23_P143190  | 0,022219589 | down | -1,6488377 | MYBL2      | Homo sapiens v-myb avian myeloblastosis viral oncogene homolog-like 2 (MYBL2), transcript variant 1, mRNA [NM_002466]   |
| A_33_P3361388 | 0,007121021 | down | -1,9170288 | MYCBPAP    | Homo sapiens MYCBP associated protein (MYCBPAP), mRNA [NM_032133]                                                       |
| A_21_P0002574 | 0,033023104 | down | -1,6460961 | MYCNUT     | Homo sapiens MYCN upstream transcript (non-protein coding) (MYCNUT), long non-coding RNA [NR_125783]                    |
| A_24_P131646  | 0,045093197 | down | -1,93593   | MYL3       | Homo sapiens myosin, light chain 3, alkali; ventricular, skeletal, slow (MYL3), mRNA [NM_000258]                        |
| A_24_P195669  | 0,047109917 | up   | 1,7565132  | MYO15B     | myosin XVb pseudogene [Source:HGNC Symbol;Acc:HGNC:14083] [ENST00000581866]                                             |
| A_33_P3298216 | 0,017748736 | down | -1,7841884 | MYO16      | Homo sapiens myosin XVI (MYO16), transcript variant 1, mRNA [NM_001198950]                                              |
| A_23_P86411   | 0,013175471 | down | -2,981841  | MYO3A      | Homo sapiens myosin IIIA (MYO3A), mRNA [NM_017433]                                                                      |

|                |             |      |            |           |                                                                                                                                 |
|----------------|-------------|------|------------|-----------|---------------------------------------------------------------------------------------------------------------------------------|
| A_23_P417853   | 0,003943107 | down | -3,089567  | MYO3B     | Homo sapiens myosin IIIB (MYO3B), transcript variant 2, mRNA [NM_138995]                                                        |
| A_23_P422350   | 0,008919479 | down | -2,6658723 | MYO7A     | Homo sapiens myosin VIIA (MYO7A), transcript variant 1, mRNA [NM_000260]                                                        |
| A_23_P160438   | 4,85E-04    | down | -2,1827946 | MYOG      | Homo sapiens myogenin (myogenic factor 4) (MYOG), mRNA [NM_002479]                                                              |
| A_33_P3265526  | 0,0274323   | down | -1,6611817 | NAA16     | Homo sapiens N(alpha)-acetyltransferase 16, NatA auxiliary subunit (NAA16), transcript variant 3, mRNA [NM_001110798]           |
| A_23_P161583   | 0,034985024 | down | -1,5058839 | NAALAD2   | Homo sapiens N-acetylated alpha-linked acidic dipeptidase 2 (NAALAD2), transcript variant 1, mRNA [NM_005467]                   |
| A_33_P3374987  | 0,038903512 | down | -1,7453496 | NAT16     | Homo sapiens N-acetyltransferase 16 (GCN5-related, putative) (NAT16), mRNA [NM_198571]                                          |
| A_23_P31798    | 0,007207064 | down | -1,7664478 | NAT2      | Homo sapiens N-acetyltransferase 2 (arylamine N-acetyltransferase) (NAT2), mRNA [NM_000015]                                     |
| A_24_P308506   | 0,013390812 | down | -2,895042  | NAT8B     | Homo sapiens N-acetyltransferase 8B (GCN5-related, putative, gene/pseudogene) (NAT8B), mRNA [NM_016347]                         |
| A_33_P3336273  | 0,011199677 | down | -2,6443272 | NAV3      | Homo sapiens neuron navigator 3 (NAV3), transcript variant 1, mRNA [NM_001024383]                                               |
| A_33_P3229328  | 0,009837533 | down | -1,8517557 | NBPF6     | Homo sapiens neuroblastoma breakpoint family, member 6 (NBPF6), transcript variant 2, mRNA [NM_001143988]                       |
| A_33_P3363799  | 0,024858827 | down | -1,6049216 | NCAM1     | Homo sapiens neural cell adhesion molecule 1 (NCAM1), transcript variant 5, mRNA [NM_001242607]                                 |
| A_33_P3363804  | 0,018789183 | down | -2,021061  | NCAM1     | Homo sapiens neural cell adhesion molecule 1 (NCAM1), transcript variant 4, mRNA [NM_001242608]                                 |
| A_33_P3239884  | 0,002841969 | down | -2,5537057 | NCAM2     | Homo sapiens neural cell adhesion molecule 2 (NCAM2), mRNA [NM_004540]                                                          |
| A_23_P153797   | 0,014627793 | down | -1,7978258 | NCAN      | Homo sapiens neurocan (NCAN), mRNA [NM_004386]                                                                                  |
| A_33_P3344423  | 0,03575051  | down | -2,0579205 | NCR3      | Homo sapiens natural cytotoxicity triggering receptor 3 (NCR3), transcript variant 3, mRNA [NM_001145467]                       |
| A_24_P944756   | 0,030244118 | down | -1,5702604 | NECAB1    | Homo sapiens N-terminal EF-hand calcium binding protein 1 (NECAB1), mRNA [NM_022351]                                            |
| A_21_P0014167  | 0,005656122 | down | -2,0893974 | NEDD9     | neural precursor cell expressed, developmentally down-regulated 9 [Source:HGNC Symbol;Acc:HGNC:7733] [ENST00000379433]          |
| A_33_P3341970  | 0,01064762  | down | -1,7429734 | NEGR1     | Homo sapiens neuronal growth regulator 1 (NEGR1), mRNA [NM_173808]                                                              |
| A_23_P155711   | 0,02755077  | down | -1,7996886 | NEIL3     | Homo sapiens nei endonuclease VIII-like 3 (E. coli) (NEIL3), mRNA [NM_018248]                                                   |
| A_33_P3250521  | 0,040740874 | down | -1,8263547 | NEK5      | Homo sapiens NIMA-related kinase 5 (NEK5), mRNA [NM_199289]                                                                     |
| A_23_P251151   | 0,03332935  | down | -1,9204824 | NELL1     | Homo sapiens NEL-like 1 (chicken) (NELL1), transcript variant 1, mRNA [NM_006157]                                               |
| A_33_P3651948  | 0,002632919 | down | -2,4755828 | NEO1      | Homo sapiens neogenin 1 (NEO1), transcript variant 1, mRNA [NM_002499]                                                          |
| A_23_P218626   | 0,015912347 | down | -1,6067183 | NEU4      | Homo sapiens sialidase 4 (NEU4), transcript variant 1, mRNA [NM_080741]                                                         |
| A_23_P24485    | 0,02755005  | up   | 1,6015421  | NFRKB     | Homo sapiens nuclear factor related to kappaB binding protein (NFRKB), transcript variant 2, mRNA [NM_006165]                   |
| A_33_P3374258  | 0,011579833 | down | -1,5482773 | NHLH2     | nescient helix loop helix 2 [Source:HGNC Symbol;Acc:HGNC:7818] [ENST00000369506]                                                |
| A_23_P119042   | 0,031219978 | down | -1,8689405 | NKG7      | Homo sapiens natural killer cell granule protein 7 (NKG7), mRNA [NM_005601]                                                     |
| A_33_P3359801  | 0,028437251 | down | -1,5990512 | NKX2-4    | Homo sapiens NK2 homeobox 4 (NKX2-4), mRNA [NM_033176]                                                                          |
| A_23_P18123    | 0,04825984  | down | -1,5699302 | NLGN1     | Homo sapiens neuroligin 1 (NLGN1), mRNA [NM_014932]                                                                             |
| A_19_P00318172 | 0,00433782  | down | -1,9935366 | NOL4L     | Homo sapiens nucleolar protein 4-like (NOL4L), transcript variant 1, mRNA [NM_001256798]                                        |
| A_33_P3347697  | 0,046253055 | down | -2,3265584 | NOVA1     | Homo sapiens neuro-oncological ventral antigen 1 (NOVA1), transcript variant 1, mRNA [NM_002515]                                |
| A_33_P3224324  | 0,01927524  | down | -1,5609238 | NOX4      | Homo sapiens NADPH oxidase 4 (NOX4), transcript variant NOX4B, mRNA [NM_001143836]                                              |
| A_21_P0010973  | 7,82E-04    | down | -2,288842  | NOX4      | Homo sapiens NADPH oxidase 4 (NOX4), transcript variant 1, mRNA [NM_016931]                                                     |
| A_33_P3372389  | 0,003357381 | down | -2,1958215 | NPHP4     | Homo sapiens nephronophthisis 4 (NPHP4), transcript variant 1, mRNA [NM_015102]                                                 |
| A_33_P3356990  | 0,03562931  | down | -1,7808349 | NPIP3B    | Homo sapiens nuclear pore complex interacting protein family, member B3 (NPIP3B), mRNA [NM_130464]                              |
| A_23_P62752    | 0,049293585 | down | -1,5550296 | NPPB      | Homo sapiens natriuretic peptide B (NPPB), mRNA [NM_002521]                                                                     |
| A_33_P3417113  | 0,014879715 | down | -2,569186  | NPSR1     | Homo sapiens neuropeptide S receptor 1 (NPSR1), transcript variant 4, mRNA [NM_001300934]                                       |
| A_33_P3232403  | 0,020753045 | down | -1,8655186 | NPSR1-AS1 | Homo sapiens NPSR1 antisense RNA 1 (NPSR1-AS1), transcript variant 3, long non-coding RNA [NR_015356]                           |
| A_23_P124905   | 0,025623603 | down | -1,8063793 | NPTX1     | Homo sapiens neuronal pentraxin I (NPTX1), mRNA [NM_002522]                                                                     |
| A_33_P3396244  | 0,03147338  | down | -1,7422631 | NPY2R     | Homo sapiens neuropeptide Y receptor Y2 (NPY2R), mRNA [NM_000910]                                                               |
| A_33_P3229412  | 0,01686717  | down | -2,3086514 | NRG3      | Homo sapiens neuregulin 3 (NRG3), transcript variant 1, mRNA [NM_001010848]                                                     |
| A_32_P486693   | 0,04066332  | down | -1,8055965 | NRIP3     | Homo sapiens nuclear receptor interacting protein 3 (NRIP3), mRNA [NM_020645]                                                   |
| A_23_P255618   | 0,027217021 | down | -1,6472136 | NRSN1     | Homo sapiens neurensin 1 (NRSN1), mRNA [NM_080723]                                                                              |
| A_33_P3273679  | 0,019523714 | down | -1,5049766 | NRXN1     | Homo sapiens neurexin 1, mRNA (cDNA clone IMAGE:4815048), complete cds. [BC046631]                                              |
| A_23_P205900   | 0,004602406 | down | -2,3870409 | NTRK3     | Homo sapiens neurotrophic tyrosine kinase, receptor, type 3 (NTRK3), transcript variant 1, mRNA [NM_001012338]                  |
| A_23_P36882    | 0,004819464 | down | -1,8925977 | NTS       | Homo sapiens neurotensin (NTS), mRNA [NM_006183]                                                                                |
| A_24_P626981   | 0,01359252  | down | -1,5124943 | NUDT16P1  | Homo sapiens nudix (nucleoside diphosphate linked moiety X)-type motif 16 pseudogene 1 (NUDT16P1), transcript variant 2, non-co |
| A_23_P393955   | 0,025015803 | down | -1,6212423 | NUTM1     | Homo sapiens NUT midline carcinoma, family member 1 (NUTM1), transcript variant 3, mRNA [NM_175741]                             |
| A_23_P148568   | 0,03134269  | down | -2,4392092 | NXF2      | Homo sapiens nuclear RNA export factor 2 (NXF2), mRNA [NM_022053]                                                               |
| A_23_P171336   | 0,00904082  | down | -1,8883972 | NXF3      | Homo sapiens nuclear RNA export factor 3 (NXF3), mRNA [NM_022052]                                                               |

|               |             |      |            |        |                                                                                                                              |
|---------------|-------------|------|------------|--------|------------------------------------------------------------------------------------------------------------------------------|
| A_33_P3423506 | 0,038413778 | down | -1,6355782 | NXPE2  | Homo sapiens neurexophilin and PC-esterase domain family, member 2 (NXPE2), mRNA [NM_182495]                                 |
| A_33_P3243917 | 0,005221182 | down | -1,650293  | OBP2B  | Homo sapiens odorant binding protein 2B (OBP2B), transcript variant alpha, mRNA [NM_014581]                                  |
| A_33_P3405399 | 0,017602803 | down | -1,6110272 | ODF2L  | Homo sapiens outer dense fiber of sperm tails 2-like (ODF2L), transcript variant 3, mRNA [NM_001184765]                      |
| A_24_P4736    | 0,014130244 | down | -2,758079  | ODF3   | Homo sapiens outer dense fiber of sperm tails 3 (ODF3), transcript variant 1, mRNA [NM_053280]                               |
| A_33_P3377256 | 0,001153963 | up   | 2,0249357  | OGFRP1 | Homo sapiens opioid growth factor receptor pseudogene 1 (OGFRP1), non-coding RNA [NR_036498]                                 |
| A_33_P3791263 | 0,030990012 | down | -1,627912  | OLFM3  | Homo sapiens olfactomedin 3 (OLFM3), transcript variant 3, mRNA [NM_001288823]                                               |
| A_23_P55286   | 0,025392123 | down | -1,5167581 | OMG    | Homo sapiens oligodendrocyte myelin glycoprotein (OMG), mRNA [NM_002544]                                                     |
| A_33_P3355886 | 0,009158146 | down | -2,1629128 | OOSP1  | oocyte secreted protein 1 [Source:HGNC Symbol;Acc:HGNC:49233] [ENST00000398992]                                              |
| A_23_P317820  | 0,024143169 | down | -1,5902946 | OOSP2  | Homo sapiens oocyte secreted protein 2 (OOSP2), mRNA [NM_173801]                                                             |
| A_33_P3404974 | 0,015888244 | down | -2,425905  | OPN5   | Homo sapiens opsin 5 (OPN5), transcript variant 1, mRNA [NM_181744]                                                          |
| A_33_P3359647 | 0,007100266 | down | -1,9313471 | OPRL1  | Homo sapiens opiate receptor-like 1 (OPRL1), transcript variant 1, mRNA [NM_182647]                                          |
| A_23_P75867   | 0,020425553 | down | -2,7280943 | OR10A4 | Homo sapiens olfactory receptor, family 10, subfamily A, member 4 (OR10A4), mRNA [NM_207186]                                 |
| A_23_P315991  | 2,55E-04    | down | -4,965023  | OR10A5 | Homo sapiens olfactory receptor, family 10, subfamily A, member 5 (OR10A5), mRNA [NM_178168]                                 |
| A_33_P3273906 | 0,04627171  | down | -1,9127558 | OR10G4 | Homo sapiens olfactory receptor, family 10, subfamily G, member 4 (OR10G4), mRNA [NM_001004462]                              |
| A_33_P3290792 | 0,024469726 | down | -2,045246  | OR10G9 | Homo sapiens olfactory receptor, family 10, subfamily G, member 9 (OR10G9), mRNA [NM_001001953]                              |
| A_33_P3359383 | 0,0329296   | down | -2,2303607 | OR10H5 | Homo sapiens olfactory receptor, family 10, subfamily H, member 5 (OR10H5), mRNA [NM_001004466]                              |
| A_23_P705     | 0,020731745 | down | -1,5605893 | OR10R2 | Homo sapiens olfactory receptor, family 10, subfamily R, member 2 (OR10R2), mRNA [NM_001004472]                              |
| A_33_P3381097 | 0,03317082  | down | -1,9448466 | OR10V1 | Homo sapiens olfactory receptor, family 10, subfamily V, member 1 (OR10V1), mRNA [NM_001005324]                              |
| A_33_P3326271 | 0,015069996 | down | -2,1182187 | OR13C2 | Homo sapiens olfactory receptor, family 13, subfamily C, member 2 (OR13C2), mRNA [NM_001004481]                              |
| A_33_P3244215 | 0,015015913 | down | -2,1482882 | OR13C5 | Homo sapiens olfactory receptor, family 13, subfamily C, member 5 (OR13C5), mRNA [NM_001004482]                              |
| A_33_P3266489 | 0,004965589 | down | -2,2513986 | OR13H1 | Homo sapiens olfactory receptor, family 13, subfamily H, member 1 (OR13H1), mRNA [NM_001004486]                              |
| A_33_P3270252 | 0,026854103 | down | -1,6455377 | OR1B1  | Homo sapiens olfactory receptor, family 1, subfamily B, member 1 (gene/pseudogene) (OR1B1), mRNA [NM_001004450]              |
| A_24_P299769  | 0,03918802  | down | -1,680728  | OR1C1  | Homo sapiens olfactory receptor, family 1, subfamily C, member 1 (OR1C1), mRNA [NM_012353]                                   |
| A_23_P15832   | 2,04E-04    | down | -3,2454913 | OR1D5  | Homo sapiens olfactory receptor, family 1, subfamily D, member 5 (OR1D5), mRNA [NM_014566]                                   |
| A_23_P38634   | 0,043097183 | down | -1,5717353 | OR1G1  | Homo sapiens olfactory receptor, family 1, subfamily G, member 1 (OR1G1), mRNA [NM_003555]                                   |
| A_23_P135226  | 6,52E-04    | down | -2,69251   | OR1N2  | Homo sapiens olfactory receptor, family 1, subfamily N, member 2 (OR1N2), mRNA [NM_001004457]                                |
| A_23_P59783   | 0,019589493 | down | -1,591302  | OR2A14 | Homo sapiens olfactory receptor, family 2, subfamily A, member 14 (OR2A14), mRNA [NM_001001659]                              |
| A_24_P52293   | 0,010447596 | down | -2,7451172 | OR2A25 | Homo sapiens olfactory receptor, family 2, subfamily A, member 25 (OR2A25), mRNA [NM_001004488]                              |
| A_33_P3262069 | 0,005720638 | down | -2,7597675 | OR2AG2 | Homo sapiens olfactory receptor, family 2, subfamily AG, member 2 (OR2AG2), mRNA [NM_001004490]                              |
| A_23_P19428   | 0,021217631 | up   | 1,666443   | OR2J2  | Homo sapiens olfactory receptor, family 2, subfamily J, member 2 (OR2J2), mRNA [NM_030905]                                   |
| A_32_P310503  | 0,044940356 | down | -2,1407912 | OR2M2  | Homo sapiens olfactory receptor, family 2, subfamily M, member 2 (OR2M2), mRNA [NM_001004688]                                |
| A_33_P3260659 | 0,004821391 | down | -2,3211706 | OR2T1  | Homo sapiens olfactory receptor, family 2, subfamily T, member 1 (OR2T1), mRNA [NM_030904]                                   |
| A_33_P3386203 | 0,013911681 | down | -2,0066903 | OR2T10 | Homo sapiens olfactory receptor, family 2, subfamily T, member 10 (OR2T10), mRNA [NM_001004693]                              |
| A_24_P281439  | 0,029881543 | down | -1,895704  | OR2T5  | Homo sapiens olfactory receptor, family 2, subfamily T, member 5 (OR2T5), mRNA [NM_001004697]                                |
| A_33_P3260684 | 0,00407762  | down | -2,4415846 | OR2T6  | Homo sapiens olfactory receptor, family 2, subfamily T, member 6 (OR2T6), mRNA [NM_001005471]                                |
| A_33_P3346529 | 0,035443623 | down | -2,147902  | OR2W5  | Homo sapiens olfactory receptor, family 2, subfamily W, member 5 (gene/pseudogene) (OR2W5), mRNA [NM_001004698]              |
| A_33_P3265709 | 0,037284248 | down | -2,1869175 | OR2Y1  | Homo sapiens olfactory receptor, family 2, subfamily Y, member 1 (OR2Y1), mRNA [NM_001001657]                                |
| A_33_P3249229 | 0,028405152 | down | -2,1856308 | OR3A4P | Homo sapiens olfactory receptor, family 3, subfamily A, member 4 pseudogene (OR3A4P), non-coding RNA [NR_024128]             |
| A_33_P3420605 | 0,03833315  | down | -2,3175163 | OR4D1  | Homo sapiens olfactory receptor, family 4, subfamily D, member 1 (OR4D1), mRNA [NM_012374]                                   |
| A_33_P3222469 | 0,046416048 | down | -1,5104042 | OR4K13 | Homo sapiens olfactory receptor, family 4, subfamily K, member 13 (OR4K13), mRNA [NM_001004714]                              |
| A_33_P3349746 | 0,043825023 | down | -1,5753626 | OR4K2  | Homo sapiens olfactory receptor, family 4, subfamily K, member 2 (OR4K2), mRNA [NM_001005501]                                |
| A_33_P3349751 | 0,010313837 | down | -1,5279223 | OR4K5  | Homo sapiens olfactory receptor, family 4, subfamily K, member 5 (OR4K5), mRNA [NM_001005483]                                |
| A_23_P13479   | 0,023037136 | down | -1,939346  | OR4S1  | Homo sapiens olfactory receptor, family 4, subfamily S, member 1 (OR4S1), mRNA [NM_001004725]                                |
| A_23_P128023  | 0,025714723 | down | -1,6901866 | OR51B4 | Homo sapiens olfactory receptor, family 51, subfamily B, member 4 (OR51B4), mRNA [NM_033179]                                 |
| A_21_P0000762 | 0,025036069 | down | -1,5392176 | OR51B5 | Homo sapiens olfactory receptor, family 51, subfamily B, member 5 (OR51B5), transcript variant 2, non-coding RNA [NR_038321] |
| A_33_P3385696 | 0,01805648  | down | -1,9870719 | OR52D1 | Homo sapiens olfactory receptor, family 52, subfamily D, member 1 (OR52D1), mRNA [NM_001005163]                              |
| A_33_P3385716 | 0,027173834 | down | -1,5179464 | OR52K1 | Homo sapiens olfactory receptor, family 52, subfamily K, member 1 (OR52K1), mRNA [NM_001005171]                              |
| A_33_P3363725 | 0,006460224 | down | -1,9825865 | OR52N5 | Homo sapiens olfactory receptor, family 52, subfamily N, member 5 (OR52N5), mRNA [NM_001001922]                              |
| A_33_P3383246 | 3,16E-04    | down | -2,1851623 | OR52R1 | Homo sapiens olfactory receptor, family 52, subfamily R, member 1 (gene/pseudogene) (OR52R1), mRNA [NM_001005177]            |

|               |             |      |            |            |                                                                                                                                              |
|---------------|-------------|------|------------|------------|----------------------------------------------------------------------------------------------------------------------------------------------|
| A_33_P3359483 | 0,030861493 | down | -1,6683838 | OR5AC2     | Homo sapiens olfactory receptor, family 5, subfamily AC, member 2 (OR5AC2), mRNA [NM_054106]                                                 |
| A_23_P1863    | 0,004353148 | down | -1,633698  | OR5AK2     | Homo sapiens olfactory receptor, family 5, subfamily AK, member 2 (OR5AK2), mRNA [NM_001005323]                                              |
| A_33_P3321462 | 0,034324516 | down | -2,1516585 | OR5B21     | Homo sapiens olfactory receptor, family 5, subfamily B, member 21 (OR5B21), mRNA [NM_001005218]                                              |
| A_33_P3224535 | 0,024968455 | down | -1,6096613 | OR5D18     | Homo sapiens olfactory receptor, family 5, subfamily D, member 18 (OR5D18), mRNA [NM_001001952]                                              |
| A_33_P3362652 | 0,030694908 | down | -1,8591263 | OR5H14     | Homo sapiens olfactory receptor, family 5, subfamily H, member 14 (OR5H14), mRNA [NM_001005514]                                              |
| A_33_P3318631 | 0,04450053  | down | -1,5870581 | OR5H2      | Homo sapiens olfactory receptor, family 5, subfamily H, member 2 (OR5H2), mRNA [NM_001005482]                                                |
| A_33_P3419551 | 0,0297491   | down | -1,683478  | OR5K1      | Homo sapiens olfactory receptor, family 5, subfamily K, member 1 (OR5K1), mRNA [NM_001004736]                                                |
| A_33_P3419562 | 0,018924652 | down | -1,7824667 | OR5K2      | Homo sapiens olfactory receptor, family 5, subfamily K, member 2 (OR5K2), mRNA [NM_001004737]                                                |
| A_23_P42241   | 0,011878522 | down | -1,8668864 | OR5V1      | Homo sapiens olfactory receptor, family 5, subfamily V, member 1 (OR5V1), mRNA [NM_030876]                                                   |
| A_33_P3222124 | 0,040385414 | down | -1,528293  | OR6B3      | Homo sapiens olfactory receptor, family 6, subfamily B, member 3 (OR6B3), mRNA [NM_173351]                                                   |
| A_33_P3379190 | 0,03627465  | down | -1,5157654 | OR6C4      | Homo sapiens olfactory receptor, family 6, subfamily C, member 4 (OR6C4), mRNA [NM_001005494]                                                |
| A_33_P3330886 | 0,019117502 | down | -1,5555087 | OR6C65     | Homo sapiens olfactory receptor, family 6, subfamily C, member 65 (OR6C65), mRNA [NM_001005518]                                              |
| A_33_P3330881 | 0,043449238 | down | -1,5133283 | OR6C75     | Homo sapiens olfactory receptor, family 6, subfamily C, member 75 (OR6C75), mRNA [NM_001005497]                                              |
| A_23_P51761   | 0,008216991 | down | -5,356401  | OR6K2      | Homo sapiens olfactory receptor, family 6, subfamily K, member 2 (OR6K2), mRNA [NM_001005279]                                                |
| A_33_P3211488 | 0,029434578 | down | -1,640576  | OR6K3      | Homo sapiens olfactory receptor, family 6, subfamily K, member 3 (OR6K3), mRNA [NM_001005327]                                                |
| A_33_P3258206 | 0,044189624 | down | -1,780782  | OR6N2      | Homo sapiens olfactory receptor, family 6, subfamily N, member 2 (OR6N2), mRNA [NM_001005278]                                                |
| A_33_P3259693 | 0,007073275 | down | -4,365351  | OR6P1      | Homo sapiens olfactory receptor, family 6, subfamily P, member 1 (OR6P1), mRNA [NM_001160325]                                                |
| A_23_P85963   | 0,007849532 | down | -2,8825476 | OR6Y1      | Homo sapiens olfactory receptor, family 6, subfamily Y, member 1 (OR6Y1), mRNA [NM_001005189]                                                |
| A_23_P16630   | 0,015471651 | down | -1,6853212 | OR7A5      | Homo sapiens olfactory receptor, family 7, subfamily A, member 5 (OR7A5), mRNA [NM_017506]                                                   |
| A_33_P3330418 | 0,028292958 | down | -2,0804675 | OR7A5      | Homo sapiens olfactory receptor, family 7, subfamily A, member 5 (OR7A5), mRNA [NM_017506]                                                   |
| A_33_P3254246 | 0,024128508 | down | -1,9104643 | OR7C1      | Homo sapiens olfactory receptor, family 7, subfamily C, member 1 (OR7C1), mRNA [NM_198944]                                                   |
| A_33_P3300610 | 0,022892961 | down | -1,8640034 | OR7G2      | Homo sapiens olfactory receptor, family 7, subfamily G, member 2 (OR7G2), mRNA [NM_001005193]                                                |
| A_23_P127662  | 0,007351937 | down | -2,6807091 | OR8D1      | Homo sapiens olfactory receptor, family 8, subfamily D, member 1 (OR8D1), mRNA [NM_001002917]                                                |
| A_23_P13195   | 0,030000508 | down | -1,9745032 | OR8G1      | Homo sapiens olfactory receptor, family 8, subfamily G, member 1 (gene/pseudogene) (OR8G1), transcript variant 1, mRNA [NM_001005199]        |
| A_23_P75707   | 0,01577365  | down | -2,4640841 | OR8H1      | Homo sapiens olfactory receptor, family 8, subfamily H, member 1 (OR8H1), mRNA [NM_001005199]                                                |
| A_33_P3305388 | 0,008085789 | down | -1,750339  | OR8K5      | Homo sapiens olfactory receptor, family 8, subfamily K, member 5 (OR8K5), mRNA [NM_001004058]                                                |
| A_23_P24676   | 0,010718057 | down | -2,850212  | OR8U1      | Homo sapiens olfactory receptor, family 8, subfamily U, member 1 (OR8U1), mRNA [NM_001005204]                                                |
| A_33_P3252583 | 0,035934936 | down | -1,714341  | OR9I1      | Homo sapiens olfactory receptor, family 9, subfamily I, member 1 (OR9I1), mRNA [NM_001005211]                                                |
| A_32_P52519   | 0,039870366 | down | -2,125239  | OTOA       | Homo sapiens otoanchorin (OTOA), transcript variant 2, mRNA [NM_170664]                                                                      |
| A_33_P3340260 | 0,04455294  | down | -2,3873303 | OTOG       | Homo sapiens otogelin (OTOG), transcript variant 1, mRNA [NM_001277269]                                                                      |
| A_23_P90997   | 0,01919352  | down | -1,5597974 | OTOS       | Homo sapiens otospiralin (OTOS), mRNA [NM_148961]                                                                                            |
| A_21_P0013524 | 0,015546041 | down | -1,7492126 | OTUD6B-AS1 | PREDICTED: Homo sapiens uncharacterized LOC100506365 (GS1-25119.4), transcript variant X3, ncRNA [XR_432334]                                 |
| A_33_P3222203 | 0,046216812 | down | -1,5790596 | OXER1      | Homo sapiens oxoeicosanoid (OXE) receptor 1 (OXER1), mRNA [NM_148962]                                                                        |
| A_23_P413760  | 0,00141387  | down | -2,0794134 | P2RX5      | Homo sapiens purinergic receptor P2X, ligand gated ion channel, 5 (P2RX5), transcript variant 2, mRNA [NM_175080]                            |
| A_24_P319113  | 0,016156284 | down | -1,7449347 | P2RX7      | Homo sapiens purinergic receptor P2X, ligand-gated ion channel, 7 (P2RX7), transcript variant 1, mRNA [NM_002562]                            |
| A_33_P3838128 | 0,004812387 | down | -2,7561374 | PABPC5-AS1 | 5000ECD06 Fetal Brain 18 Homo sapiens cDNA 5', mRNA sequence [DR033788]                                                                      |
| A_33_P3358213 | 0,003705944 | down | -2,299844  | PADI6      | Homo sapiens peptidyl arginine deiminase, type VI (PADI6), mRNA [NM_207421]                                                                  |
| A_24_P254506  | 0,016567204 | down | -1,8143921 | PAGE4      | Homo sapiens P antigen family, member 4 (prostate associated) (PAGE4), mRNA [NM_007003]                                                      |
| A_23_P161481  | 0,045414384 | down | -1,5948199 | PALD1      | Homo sapiens phosphatase domain containing, paladin 1 (PALD1), mRNA [NM_014431]                                                              |
| A_33_P3258061 | 0,008578483 | down | -1,6063448 | PALM3      | Homo sapiens paralemmin 3 (PALM3), mRNA [NM_001145028]                                                                                       |
| A_33_P3258056 | 0,002306606 | down | -2,869416  | PALM3      | Homo sapiens paralemmin 3 (PALM3), mRNA [NM_001145028]                                                                                       |
| A_23_P87072   | 0,001147769 | down | -2,2309823 | PANX3      | Homo sapiens pannexin 3 (PANX3), mRNA [NM_052959]                                                                                            |
| A_21_P0004005 | 0,013925897 | down | -1,6637568 | PART1      | Homo sapiens prostate androgen-regulated transcript 1 (non-protein coding) (PART1), transcript variant 3, long non-coding RNA [NR_001005199] |
| A_23_P404059  | 0,04943351  | down | -1,8155209 | PASD1      | Homo sapiens PAS domain containing 1 (PASD1), mRNA [NM_173493]                                                                               |
| A_33_P3381378 | 0,046911106 | down | -1,8302609 | PAX1       | Homo sapiens paired box 1 (PAX1), transcript variant 2, mRNA [NM_001257096]                                                                  |
| A_23_P209499  | 0,04743609  | down | -2,408312  | PAX3       | Homo sapiens paired box 3 (PAX3), transcript variant PAX3D, mRNA [NM_181458]                                                                 |
| A_23_P500985  | 0,022460757 | down | -1,786175  | PAX7       | Homo sapiens paired box 7 (PAX7), transcript variant 2, mRNA [NM_013945]                                                                     |
| A_21_P0000824 | 0,02732842  | down | -1,6523719 | PAXBP1-AS1 | Homo sapiens PAXBP1 antisense RNA 1 (PAXBP1-AS1), transcript variant 2, long non-coding RNA [NR_038880]                                      |
| A_33_P3297040 | 0,004619776 | down | -2,057278  | PBOV1      | Homo sapiens prostate and breast cancer overexpressed 1 (PBOV1), mRNA [NM_021635]                                                            |

|               |             |      |            |             |                                                                                                                       |
|---------------|-------------|------|------------|-------------|-----------------------------------------------------------------------------------------------------------------------|
| A_24_P247849  | 0,031391047 | down | -1,7146211 | PBX1        | pre-B-cell leukemia homeobox 1 [Source:HGNC Symbol;Acc:HGNC:8632] [ENST00000474046]                                   |
| A_23_P90419   | 0,03150541  | up   | 1,7349693  | PBX4        | Homo sapiens pre-B-cell leukemia homeobox 4 (PBX4), transcript variant 1, mRNA [NM_025245]                            |
| A_24_P111147  | 0,008438322 | down | -1,6621444 | PCDH15      | protocadherin-related 15 [Source:HGNC Symbol;Acc:HGNC:14674] [ENST00000373955]                                        |
| A_23_P161331  | 0,0409735   | down | -1,6947165 | PCDH15      | Homo sapiens protocadherin-related 15 (PCDH15), transcript variant C, mRNA [NM_033056]                                |
| A_33_P3250348 | 0,032262944 | down | -1,5183926 | PCDH18      | Homo sapiens protocadherin 18 (PCDH18), transcript variant 1, mRNA [NM_019035]                                        |
| A_33_P3423230 | 0,019828225 | down | -1,601106  | PCDH19      | Homo sapiens protocadherin 19 (PCDH19), transcript variant 3, mRNA [NM_001184880]                                     |
| A_24_P419039  | 5,07E-04    | down | -2,4353812 | PCDH19      | Homo sapiens protocadherin 19 (PCDH19), transcript variant 2, mRNA [NM_020766]                                        |
| A_33_P3258546 | 0,004212022 | down | -2,5884864 | PCDHA5      | Homo sapiens protocadherin alpha 5 (PCDHA5), transcript variant 2, mRNA [NM_031501]                                   |
| A_23_P144627  | 0,006557134 | down | -1,5764344 | PCDHB13     | Homo sapiens protocadherin beta 13 (PCDHB13), mRNA [NM_018933]                                                        |
| A_23_P58464   | 0,034339726 | down | -1,567382  | PCDHB6      | Homo sapiens protocadherin beta 6 (PCDHB6), transcript variant 1, mRNA [NM_018939]                                    |
| A_23_P303101  | 0,002023251 | down | -2,8505929 | PCDHGC4     | Homo sapiens protocadherin gamma subfamily C, 4 (PCDHGC4), transcript variant 2, mRNA [NM_032406]                     |
| A_33_P3380361 | 0,03516438  | down | -1,714423  | PCGEM1      | Homo sapiens PCGEM1, prostate-specific transcript (non-protein coding) (PCGEM1), long non-coding RNA [NR_002769]      |
| A_32_P109876  | 0,001757039 | down | -2,1307557 | PCLO        | Homo sapiens piccolo presynaptic cytomatrix protein (PCLO), transcript variant 1, mRNA [NM_033026]                    |
| A_23_P136405  | 0,008593064 | down | -1,5554755 | PDCD1       | Homo sapiens programmed cell death 1 (PDCD1), mRNA [NM_005018]                                                        |
| A_23_P363301  | 0,035008356 | down | -2,0084164 | PDCL2       | Homo sapiens phosphducin-like 2 (PDCL2), mRNA [NM_152401]                                                             |
| A_32_P116857  | 0,024232931 | down | -1,5943699 | PDE11A      | Homo sapiens phosphodiesterase 11A (PDE11A), transcript variant 4, mRNA [NM_016953]                                   |
| A_24_P43144   | 0,028661901 | down | -1,9567113 | PDE11A      | Homo sapiens phosphodiesterase 11A (PDE11A), transcript variant 2, mRNA [NM_001077358]                                |
| A_24_P208436  | 0,001804135 | down | -3,6961048 | PDE1A       | Homo sapiens phosphodiesterase 1A, calmodulin-dependent (PDE1A), transcript variant 2, mRNA [NM_001003683]            |
| A_23_P74278   | 0,045435812 | down | -2,1193247 | PDE4B       | Homo sapiens phosphodiesterase 4B, cAMP-specific (PDE4B), transcript variant d, mRNA [NM_001037341]                   |
| A_33_P3759611 | 0,04839397  | down | -1,883238  | PDE4C       | Homo sapiens phosphodiesterase 4C, cAMP-specific (PDE4C), transcript variant 1, mRNA [NM_000923]                      |
| A_23_P10743   | 0,016055655 | down | -2,5153842 | PDE6B       | Homo sapiens phosphodiesterase 6B, cGMP-specific, rod, beta (PDE6B), transcript variant 1, mRNA [NM_000283]           |
| A_23_P98070   | 0,021761954 | down | -2,0409334 | PDE6C       | Homo sapiens phosphodiesterase 6C, cGMP-specific, cone, alpha prime (PDE6C), mRNA [NM_006204]                         |
| A_24_P70906   | 0,02700309  | down | -1,7115198 | PDILT       | Homo sapiens protein disulfide isomerase-like, testis expressed (PDILT), mRNA [NM_174924]                             |
| A_23_P65189   | 0,021605043 | down | -1,7435932 | PDX1        | Homo sapiens pancreatic and duodenal homeobox 1 (PDX1), mRNA [NM_000209]                                              |
| A_33_P3229402 | 0,046958726 | down | -1,5581459 | PECAM1      | Homo sapiens platelet/endothelial cell adhesion molecule 1 (PECAM1), mRNA [NM_000442]                                 |
| A_23_P252471  | 0,029860396 | down | -1,58969   | PECAM1      | Homo sapiens platelet/endothelial cell adhesion molecule 1 (PECAM1), mRNA [NM_000442]                                 |
| A_33_P3271325 | 0,007715667 | down | -2,5816746 | PER4        | Homo sapiens Per4 pseudogene, mRNA sequence. [AF348410]                                                               |
| A_23_P259003  | 0,040193457 | down | -1,7555931 | PEX5L       | Homo sapiens peroxisomal biogenesis factor 5-like (PEX5L), transcript variant 1, mRNA [NM_016559]                     |
| A_24_P120907  | 0,033085685 | down | -1,6302824 | PGM5        | Homo sapiens phosphoglucomutase 5 (PGM5), mRNA [NM_021965]                                                            |
| A_21_P0011953 | 0,003449355 | down | -2,1517708 | PGM5P3-AS1  | Homo sapiens PGM5P3 antisense RNA 1 (PGM5P3-AS1), transcript variant 3, long non-coding RNA [NR_121190]               |
| A_21_P0012084 | 0,047295164 | down | -1,6837814 | PGM5P4-AS1  | Homo sapiens PGM5P4 antisense RNA 1 (PGM5P4-AS1), transcript variant 1, long non-coding RNA [NR_121185]               |
| A_23_P138938  | 0,03896207  | down | -1,7553858 | PGR         | Homo sapiens progesterone receptor (PGR), transcript variant 2, mRNA [NM_000926]                                      |
| A_32_P49199   | 0,03604469  | down | -2,151365  | PGR         | Homo sapiens progesterone receptor (PGR), transcript variant 2, mRNA [NM_000926]                                      |
| A_33_P3333627 | 0,011927024 | up   | 1,6296293  | PHACTR1     | Homo sapiens phosphatase and actin regulator 1 (PHACTR1), transcript variant 1, mRNA [NM_030948]                      |
| A_33_P3294302 | 0,001482816 | down | -2,2683    | PHLDA1      | pleckstrin homology-like domain, family A, member 1 [Source:HGNC Symbol;Acc:HGNC:8933] [ENST00000266671]              |
| A_33_P3884610 | 0,035532076 | down | -1,6387417 | PIP5K1P1    | Homo sapiens phosphatidylinositol-4-phosphate 5-kinase, type I, pseudogene 1 (PIP5K1P1), non-coding RNA [NR_027712]   |
| A_24_P221858  | 0,009242502 | down | -1,9021239 | PIWIL3      | Homo sapiens piwi-like RNA-mediated gene silencing 3 (PIWIL3), transcript variant 1, mRNA [NM_001008496]              |
| A_32_P92489   | 0,014702252 | down | -1,6848819 | PKD1L2      | Homo sapiens polycystic kidney disease 1-like 2 (gene/pseudogene) (PKD1L2), transcript variant 1, mRNA [NM_052892]    |
| A_23_P129332  | 0,042786203 | down | -1,9189802 | PKD1L2      | Homo sapiens polycystic kidney disease 1-like 2 (gene/pseudogene) (PKD1L2), transcript variant 3, mRNA [NM_001076780] |
| A_33_P3254136 | 0,029659249 | down | -1,50774   | PKHD1L1     | Homo sapiens polycystic kidney and hepatic disease 1 (autosomal recessive)-like 1 (PKHD1L1), mRNA [NM_177531]         |
| A_23_P145529  | 0,0375816   | up   | 1,6652653  | PKIB        | Homo sapiens protein kinase (cAMP-dependent, catalytic) inhibitor beta (PKIB), transcript variant 1, mRNA [NM_181795] |
| A_33_P3242829 | 0,006623486 | up   | 1,9147525  | PKN2        | protein kinase N2 [Source:HGNC Symbol;Acc:HGNC:9406] [ENST00000370505]                                                |
| A_23_P300100  | 0,04553141  | down | -1,9364897 | PLA2G2D     | phospholipase A2, group IID [Source:HGNC Symbol;Acc:HGNC:9033] [ENST00000375105]                                      |
| A_21_P0008628 | 0,01404575  | down | -1,5317932 | PLA2G4E-AS1 | Homo sapiens PLA2G4E antisense RNA 1 (PLA2G4E-AS1), long non-coding RNA [NR_120334]                                   |
| A_23_P16469   | 0,03658775  | up   | 2,0255094  | PLAUR       | Homo sapiens plasminogen activator, urokinase receptor (PLAUR), transcript variant 3, mRNA [NM_001005377]             |
| A_33_P3381623 | 0,031122813 | down | -2,1630507 | PLB1        | Homo sapiens phospholipase B1 (PLB1), transcript variant 1, mRNA [NM_153021]                                          |
| A_21_P0014399 | 0,014517419 | down | -2,2547927 | PLCG1-AS1   | Homo sapiens PLCG1 antisense RNA 1 (PLCG1-AS1), long non-coding RNA [NR_109889]                                       |
| A_33_P3334180 | 0,008099051 | down | -2,2826352 | PLCH2       | phospholipase C, eta 2 [Source:HGNC Symbol;Acc:HGNC:29037] [ENST00000473964]                                          |
| A_21_P0014779 | 0,005460852 | down | -2,3653927 | PLIN2       | perilipin 2 [Source:HGNC Symbol;Acc:HGNC:248] [ENST00000494753]                                                       |

|               |             |      |            |                    |                                                                                                                                                                                                                                         |
|---------------|-------------|------|------------|--------------------|-----------------------------------------------------------------------------------------------------------------------------------------------------------------------------------------------------------------------------------------|
| A_33_P3209885 | 0,033807635 | down | -1,9375224 | PLXDC1             | Homo sapiens plexin domain containing 1 (PLXDC1), mRNA [NM_020405]                                                                                                                                                                      |
| A_23_P321223  | 0,049739998 | down | -1,9099728 | PMCH               | Homo sapiens pro-melanin-concentrating hormone (PMCH), mRNA [NM_002674]                                                                                                                                                                 |
| A_23_P24083   | 0,022197308 | down | -1,8066955 | PNLIPRP2           | Homo sapiens pancreatic lipase-related protein 2 (PNLIPRP2), transcript variant 1, mRNA [NM_005396]                                                                                                                                     |
| A_33_P3328863 | 9,70E-04    | down | -2,1913567 | PNMAL2             | Homo sapiens paraneoplastic Ma antigen family-like 2 (PNMAL2), mRNA [NM_020709]                                                                                                                                                         |
| A_23_P218827  | 0,024349459 | down | -1,7427821 | POLQ               | Homo sapiens polymerase (DNA directed), theta (POLQ), mRNA [NM_199420]                                                                                                                                                                  |
| A_33_P3273819 | 0,032691617 | down | -1,6763145 | POT1-AS1           | Homo sapiens POT1 antisense RNA 1 (POT1-AS1), transcript variant 2, long non-coding RNA [NR_125719]                                                                                                                                     |
| A_23_P420348  | 0,030440873 | down | -1,6018723 | POTED              | Homo sapiens POTE ankyrin domain family, member D (POTED), mRNA [NM_174981]                                                                                                                                                             |
| A_24_P825874  | 0,042660728 | down | -1,818898  | POTEI              | Homo sapiens POTE ankyrin domain family, member I (POTEI), mRNA [NM_001277406]                                                                                                                                                          |
| A_23_P125505  | 0,02732394  | down | -2,2345095 | PPEF1              | Homo sapiens protein phosphatase, EF-hand calcium binding domain 1 (PPEF1), transcript variant 1, mRNA [NM_006240]                                                                                                                      |
| A_23_P402936  | 0,03402005  | down | -2,4539344 | PPFIA2             | Homo sapiens protein tyrosine phosphatase, receptor type, I polypeptide (PTPRF), interacting protein (liprin), alpha 2 (PPFIA2), trans peptidylprolyl isomerase H (cyclophilin H) [Source:HGNC Symbol;Acc:HGNC:14651] [ENST00000372550] |
| A_33_P3239122 | 0,003219153 | down | -1,9094028 | PPIH               | Homo sapiens protein phosphatase 1, regulatory subunit 16B (PPP1R16B), transcript variant 1, mRNA [NM_015568]                                                                                                                           |
| A_23_P352535  | 0,012496718 | down | -1,8338985 | PPP1R16B           | Homo sapiens protein phosphatase 1, regulatory (inhibitor) subunit 1A (PPP1R1A), mRNA [NM_006741]                                                                                                                                       |
| A_24_P13285   | 0,03417862  | down | -2,4174519 | PPP1R1A            | Homo sapiens cDNA FLJ41975 fis, clone SKNMC2006998, moderately similar to PROTEIN PHOSPHATASE INHIBITOR 1. [AK1239C]                                                                                                                    |
| A_33_P3383471 | 2,56E-04    | down | -2,637356  | PPP1R1A            | Homo sapiens protein phosphatase 1, regulatory subunit 32 (PPP1R32), transcript variant 1, mRNA [NM_145017]                                                                                                                             |
| A_23_P98571   | 0,020380264 | up   | 1,557742   | PPP1R32            | Homo sapiens protein phosphatase 1, regulatory subunit 3A (PPP1R3A), mRNA [NM_002711]                                                                                                                                                   |
| A_33_P3213179 | 0,016068015 | down | -1,7629584 | PPP1R3A            | Homo sapiens protein phosphatase 1, regulatory subunit 3F (PPP1R3F), transcript variant 1, mRNA [NM_033215]                                                                                                                             |
| A_24_P177604  | 0,01069072  | down | -1,5203142 | PPP1R3F            | Homo sapiens pancreatic polypeptide (PPY), mRNA [NM_002722]                                                                                                                                                                             |
| A_23_P207336  | 0,020148592 | down | -2,1200163 | PPY                | Homo sapiens prostate cancer susceptibility candidate 2 (PRAC2), transcript variant 2, mRNA [NM_001282275]                                                                                                                              |
| A_33_P3308456 | 0,003020654 | down | -2,3672547 | PRAC2              | Homo sapiens PRAME family member 11 (PRAMEF11), mRNA [NM_001146344]                                                                                                                                                                     |
| A_33_P3303594 | 0,033531234 | down | -1,5788069 | PRAMEF11           | Homo sapiens PRAME family member 8 (PRAMEF8), mRNA [NM_001012276]                                                                                                                                                                       |
| A_23_P126658  | 0,00163893  | down | -1,9134471 | PRAMEF8            | Homo sapiens PR domain containing 13 (PRDM13), mRNA [NM_021620]                                                                                                                                                                         |
| A_23_P256581  | 0,020443026 | down | -1,5253493 | PRDM13             | Homo sapiens PR domain containing 14 (PRDM14), mRNA [NM_024504]                                                                                                                                                                         |
| A_23_P123488  | 0,033076752 | down | -1,6322678 | PRDM14             | Homo sapiens phosphatidylinositol-3,4,5-trisphosphate-dependent Rac exchange factor 2 (PREX2), transcript variant 2, mRNA [NM_001108755]                                                                                                |
| A_33_P3394993 | 0,011087554 | down | -3,464921  | PREX2              | Homo sapiens perforin 1 (pore forming protein) (PRF1), transcript variant 1, mRNA [NM_005041]                                                                                                                                           |
| A_23_P1473    | 0,00211822  | down | -2,901628  | PRF1               | Homo sapiens proteoglycan 3 (PRG3), mRNA [NM_006093]                                                                                                                                                                                    |
| A_23_P47466   | 0,021974158 | down | -1,7820842 | PRG3               | Homo sapiens proteoglycan 4 (PRG4), transcript variant A, mRNA [NM_005807]                                                                                                                                                              |
| A_33_P3369178 | 0,0368909   | down | -1,5547136 | PRG4               | Homo sapiens protein kinase C, gamma (PRKCG), mRNA [NM_002739]                                                                                                                                                                          |
| A_23_P16189   | 0,012960743 | down | -2,2491133 | PRKCG              | PRKCG antisense RNA 1 [Source:HGNC Symbol;Acc:HGNC:44689] [ENST00000608526]                                                                                                                                                             |
| A_21_P0006825 | 0,030877028 | down | -1,7936928 | PRKCQ-AS1          | Homo sapiens protein kinase, cGMP-dependent, type I (PRKG1), transcript variant 2, mRNA [NM_006258]                                                                                                                                     |
| A_24_P250765  | 0,012637203 | down | -2,5618713 | PRKG1              | Homo sapiens prolactin receptor (PRLR), transcript variant 2, mRNA [NM_001204315]                                                                                                                                                       |
| A_33_P3416757 | 0,032219727 | down | -1,5744605 | PRLR               | Homo sapiens prolactin receptor (PRLR), transcript variant 1, mRNA [NM_000949]                                                                                                                                                          |
| A_23_P167468  | 0,026686197 | down | -1,6078331 | PRLR               | Homo sapiens protamine 1 (PRM1), mRNA [NM_002761]                                                                                                                                                                                       |
| A_23_P100189  | 0,036417995 | down | -1,5783534 | PRM1               | Homo sapiens prominin 1 (PROM1), transcript variant 6, mRNA [NM_001145850]                                                                                                                                                              |
| A_33_P3389842 | 0,024132708 | down | -1,590863  | PROM1              | Homo sapiens protein Z, vitamin K-dependent plasma glycoprotein (PROZ), transcript variant 2, mRNA [NM_003891]                                                                                                                          |
| A_23_P140074  | 0,028099801 | down | -1,5098361 | PROZ               | Homo sapiens peripherin 2 (retinal degeneration, slow) (PRPH2), mRNA [NM_000322]                                                                                                                                                        |
| A_23_P214459  | 0,029717173 | down | -2,1787717 | PRPH2              | Homo sapiens proline rich 23A (PRR23A), mRNA [NM_001134659]                                                                                                                                                                             |
| A_33_P3334708 | 0,029183386 | down | -1,6497078 | PRR23A             | Homo sapiens proline rich 30 (PRR30), mRNA [NM_178553]                                                                                                                                                                                  |
| A_23_P351328  | 0,001161686 | down | -3,0344086 | PRR30              | Homo sapiens proline rich Glu (G-carboxyglutamic acid) 3 (transmembrane) (PRRG3), transcript variant 1, mRNA [NM_024082]                                                                                                                |
| A_23_P387537  | 0,003706914 | down | -2,592161  | PRRG3              | Homo sapiens protease, serine, 22 (PRSS22), mRNA [NM_022119]                                                                                                                                                                            |
| A_23_P400298  | 0,034459036 | up   | 1,6042997  | PRSS22             | Homo sapiens protease, serine, 30, pseudogene (PRSS30P), non-coding RNA [NR_026864]                                                                                                                                                     |
| A_23_P350719  | 4,59E-04    | up   | 2,4456582  | PRSS30P            | Homo sapiens protease, serine, 33 (PRSS33), mRNA [NM_152891]                                                                                                                                                                            |
| A_24_P327084  | 0,034861688 | down | -2,00523   | PRSS33             | Homo sapiens protease, serine, 38 (PRSS38), mRNA [NM_183062]                                                                                                                                                                            |
| A_33_P3332166 | 0,042544346 | down | -2,235401  | PRSS38             | Homo sapiens prune homolog 2 (Drosophila) (PRUNE2), mRNA [NM_015225]                                                                                                                                                                    |
| A_23_P406025  | 0,021081101 | down | -2,046563  | PRUNE2             | Homo sapiens PTPN13-like, Y-linked 2 (PRY2), mRNA [NM_001002758]                                                                                                                                                                        |
| A_23_P11408   | 6,76E-04    | down | -2,7966206 | PRY2               | Homo sapiens prosaposin-like 1 (gene/pseudogene) (PSAPL1), mRNA [NM_001085382]                                                                                                                                                          |
| A_33_P3383004 | 0,028017398 | down | -1,5436888 | PSAPL1             | Homo sapiens patched 2 (PTCH2), transcript variant 1, mRNA [NM_003738]                                                                                                                                                                  |
| A_23_P355311  | 0,02011157  | down | -2,0062895 | PTCH2              | Homo sapiens prostaglandin E receptor 3 (subtype EP3) (PTGER3), transcript variant 4, mRNA [NM_198714]                                                                                                                                  |
| A_23_P103328  | 0,014799698 | down | -1,5368288 | PTGER3             | Homo sapiens PTGER4P2-CDK2AP2P2 readthrough transcribed pseudogene (PTGER4P2-CDK2AP2P2), non-coding RNA [NR_02                                                                                                                          |
| A_24_P135875  | 0,03493849  | down | -2,0114586 | PTGER4P2-CDK2AP2P2 |                                                                                                                                                                                                                                         |

|               |             |      |            |             |                                                                                                                       |
|---------------|-------------|------|------------|-------------|-----------------------------------------------------------------------------------------------------------------------|
| A_23_P12392   | 0,021553507 | down | -1,5038058 | PTPRC       | Homo sapiens protein tyrosine phosphatase, receptor type, C (PTPRC), transcript variant 4, non-coding RNA [NR_052021] |
| A_33_P3364811 | 0,009837327 | down | -2,0276864 | PTPRC       | Homo sapiens protein tyrosine phosphatase, receptor type, C (PTPRC), transcript variant 1, mRNA [NM_002838]           |
| A_24_P639665  | 0,03575465  | down | -1,5028753 | PTPRD-AS1   | Homo sapiens PTPRD antisense RNA 1 (PTPRD-AS1), transcript variant 1, long non-coding RNA [NR_121599]                 |
| A_33_P3344911 | 0,046657693 | down | -1,65717   | PTPRQ       | Homo sapiens protein tyrosine phosphatase, receptor type, Q (PTPRQ), mRNA [NM_001145026]                              |
| A_23_P111919  | 0,044083185 | down | -1,5362079 | PURG        | Homo sapiens purine-rich element binding protein G (PURG), transcript variant A, mRNA [NM_013357]                     |
| A_21_P0014107 | 0,03620525  | down | -1,7610126 | PVRL3-AS1   | Homo sapiens PVRL3 antisense RNA 1 (PVRL3-AS1), long non-coding RNA [NR_045114]                                       |
| A_33_P3352293 | 0,0342977   | down | -1,5516156 | PWRN2       | Homo sapiens Prader-Willi region non-protein coding RNA 2 (PWRN2), long non-coding RNA [NR_026647]                    |
| A_23_P333022  | 0,01464301  | down | -1,5140634 | PXT1        | Homo sapiens peroxisomal, testis specific 1 (PXT1), mRNA [NM_152990]                                                  |
| A_33_P3307568 | 0,011544356 | down | -1,9397079 | PYDC2       | Homo sapiens pyrin domain containing 2 (PYDC2), mRNA [NM_001083308]                                                   |
| A_24_P233078  | 0,003553038 | down | -1,5936139 | PYY2        | Homo sapiens peptide YY, 2 (pseudogene) (PYY2), non-coding RNA [NR_003064]                                            |
| A_33_P3257866 | 0,020632543 | down | -1,7823973 | PYY2        | Homo sapiens peptide YY, 2 (pseudogene) (PYY2), non-coding RNA [NR_003064]                                            |
| A_23_P9565    | 0,034188855 | down | -1,9924444 | RAB33B      | Homo sapiens RAB33B, member RAS oncogene family (RAB33B), mRNA [NM_031296]                                            |
| A_33_P3665739 | 0,006331355 | down | -2,84996   | RAB43       | AGENCOURT_6606420 NIH_MGC_106 Homo sapiens cDNA clone IMAGE:5483928 5', mRNA sequence [BM917410]                      |
| A_21_P0014768 | 0,009542707 | up   | 1,5444516  | RABGEF1     | Homo sapiens RAB guanine nucleotide exchange factor (GEF) 1 (RABGEF1), transcript variant 1, mRNA [NM_001287060]      |
| A_23_P94141   | 0,033640523 | down | -1,5639945 | RAD54B      | Homo sapiens RAD54 homolog B (S. cerevisiae) (RAD54B), transcript variant 2, mRNA [NM_001205262]                      |
| A_33_P3361227 | 0,031787764 | down | -1,523814  | RAD9B       | RAD9 homolog B (S. pombe) [Source:HGNC Symbol;Acc:HGNC:21700] [ENST00000409461]                                       |
| A_23_P111860  | 0,027753724 | down | -1,5966492 | RADIL       | Homo sapiens Ras association and DIL domains (RADIL), mRNA [NM_018059]                                                |
| A_23_P64525   | 0,013250612 | down | -1,7757229 | RAG2        | Homo sapiens recombination activating gene 2 (RAG2), transcript variant 1, mRNA [NM_000536]                           |
| A_24_P116710  | 0,024685333 | down | -1,5919541 | RAMP2       | Homo sapiens receptor (G protein-coupled) activity modifying protein 2 (RAMP2), mRNA [NM_005854]                      |
| A_33_P3390367 | 0,046583578 | down | -1,5535983 | RAPGEF4-AS1 | Homo sapiens RAPGEF4 antisense RNA 1 (RAPGEF4-AS1), long non-coding RNA [NR_026995]                                   |
| A_33_P3209950 | 6,31E-04    | down | -1,975907  | RASGRP2     | RAS guanyl releasing protein 2 (calcium and DAG-regulated) [Source:HGNC Symbol;Acc:HGNC:9879] [ENST00000377494]       |
| A_24_P288448  | 0,00798671  | down | -2,8284748 | RASSF2      | Ras association (RalGDS/AF-6) domain family member 2 [Source:HGNC Symbol;Acc:HGNC:9883] [ENST00000478553]             |
| A_21_P0013891 | 0,007988425 | down | -1,6082373 | RBM1B       | Homo sapiens RNA binding motif protein, Y-linked, family 1, member B (RBM1B), mRNA [NM_001006121]                     |
| A_24_P400604  | 0,03346542  | down | -1,6095589 | RBM1B       | Homo sapiens RNA binding motif protein, Y-linked, family 1, member B (RBM1B), mRNA [NM_001006121]                     |
| A_33_P3382648 | 0,03444707  | down | -2,2658005 | RBM1B       | Homo sapiens RNA binding motif protein, Y-linked, family 1, member B (RBM1B), mRNA [NM_001006121]                     |
| A_24_P357406  | 0,036492184 | down | -3,09754   | RBM1B       | Homo sapiens RNA binding motif protein, Y-linked, family 1, member B (RBM1B), mRNA [NM_001006121]                     |
| A_24_P794648  | 0,04699977  | down | -1,9063456 | RBM2EP      | Homo sapiens RNA binding motif protein, Y-linked, family 2, member E pseudogene (RBM2EP), non-coding RNA [NR_001574]  |
| A_33_P3332180 | 0,015776986 | down | -1,6796435 | RBP3        | Homo sapiens retinol binding protein 3, interstitial (RBP3), mRNA [NM_002900]                                         |
| A_23_P389500  | 0,016380938 | down | -2,0475123 | REG1B       | Homo sapiens regenerating islet-derived 1 beta (REG1B), mRNA [NM_006507]                                              |
| A_23_P119936  | 0,00250462  | down | -2,6922388 | REG3A       | Homo sapiens regenerating islet-derived 3 alpha (REG3A), transcript variant 2, mRNA [NM_138938]                       |
| A_32_P65628   | 0,040335067 | down | -1,5178937 | REG3G       | Homo sapiens regenerating islet-derived 3 gamma (REG3G), transcript variant 1, mRNA [NM_001008387]                    |
| A_33_P3259861 | 4,70E-04    | down | -1,6689343 | REREP3      | Homo sapiens arginine-glutamic acid dipeptide (RE) repeats pseudogene 3 (REREP3), non-coding RNA [NR_033735]          |
| A_24_P321525  | 0,019384399 | down | -2,7674422 | REREG       | Homo sapiens RAS-like, estrogen-regulated, growth inhibitor (REREG), transcript variant 1, mRNA [NM_032918]           |
| A_33_P3562537 | 0,009784841 | down | -1,727199  | RET         | Homo sapiens ret proto-oncogene (RET), transcript variant 4, mRNA [NM_020630]                                         |
| A_23_P92196   | 0,008156353 | down | -2,1651845 | RETNLB      | Homo sapiens resistin like beta (RETNLB), mRNA [NM_032579]                                                            |
| A_32_P118568  | 0,04419269  | down | -1,7633426 | RFPL1S      | Homo sapiens RFPL1 antisense RNA 1 (RFPL1S), antisense RNA [NR_002727]                                                |
| A_33_P3397835 | 0,028696736 | down | -1,5436453 | RFPL4B      | Homo sapiens ret finger protein-like 4B (RFPL4B), mRNA [NM_001013734]                                                 |
| A_21_P0014387 | 0,0481745   | up   | 1,9874269  | RFX2        | regulatory factor X, 2 (influences HLA class II expression) [Source:HGNC Symbol;Acc:HGNC:9983] [ENST00000587700]      |
| A_33_P3281741 | 4,93E-05    | down | -3,6344013 | RFX8        | Homo sapiens RFX family member 8, lacking RFX DNA binding domain (RFX8), mRNA [NM_001145664]                          |
| A_33_P3379606 | 0,004223689 | down | -2,1260705 | RGS7BP      | Homo sapiens regulator of G-protein signaling 7 binding protein (RGS7BP), transcript variant 1, mRNA [NM_001029875]   |
| A_21_P0000057 | 0,04901155  | down | -1,7914121 | RGS9        | Homo sapiens regulator of G-protein signaling 9 (RGS9), transcript variant 3, mRNA [NM_001165933]                     |
| A_33_P3364661 | 0,004959233 | down | -1,7044164 | RHOA        | ras homolog family member A [Source:HGNC Symbol;Acc:HGNC:667] [ENST00000265538]                                       |
| A_24_P162226  | 0,004750913 | down | -1,9699838 | RIMBP2      | Homo sapiens RIMS binding protein 2 (RIMBP2), mRNA [NM_015347]                                                        |
| A_32_P38645   | 0,028343802 | down | -2,2389953 | RIMS4       | Homo sapiens regulating synaptic membrane exocytosis 4 (RIMS4), transcript variant 2, mRNA [NM_182970]                |
| A_33_P3303291 | 0,003236403 | up   | 1,6796671  | RIPK3       | Homo sapiens receptor-interacting serine-threonine kinase 3 (RIPK3), mRNA [NM_006871]                                 |
| A_24_P99066   | 0,01730723  | down | -1,611368  | RNF17       | Homo sapiens ring finger protein 17 (RNF17), transcript variant 1, mRNA [NM_031277]                                   |
| A_23_P126248  | 3,00E-04    | down | -2,6069722 | RNF186      | Homo sapiens ring finger protein 186 (RNF186), mRNA [NM_019062]                                                       |
| A_33_P3324775 | 0,020811899 | down | -1,7813789 | RORB-AS1    | Homo sapiens RORB antisense RNA 1 (RORB-AS1), long non-coding RNA [NR_125791]                                         |
| A_33_P3421028 | 0,017858334 | down | -1,6955128 | ROS1        | ROS proto-oncogene 1, receptor tyrosine kinase [Source:HGNC Symbol;Acc:HGNC:10261] [ENST00000403284]                  |



|               |             |      |            |            |                                                                                                                               |
|---------------|-------------|------|------------|------------|-------------------------------------------------------------------------------------------------------------------------------|
| A_33_P3249329 | 0,045990188 | down | -2,0362694 | RPEL1      | Homo sapiens ribulose-5-phosphate-3-epimerase-like 1 (RPEL1), mRNA [NM_001143909]                                             |
| A_33_P3226420 | 0,01062754  | down | -2,2720504 | RSAD2      | radical S-adenosyl methionine domain containing 2 [Source:HGNC Symbol;Acc:HGNC:30908] [ENST00000474872]                       |
| A_23_P130653  | 0,04245527  | down | -1,5393481 | RTBDN      | Homo sapiens retbindin (RTBDN), transcript variant 2, mRNA [NM_031429]                                                        |
| A_23_P432056  | 0,00145678  | down | -1,9153086 | RTN4RL1    | Homo sapiens reticulon 4 receptor-like 1 (RTN4RL1), mRNA [NM_178568]                                                          |
| A_33_P3296997 | 0,032993436 | up   | 1,5298659  | RUFY4      | Homo sapiens RUN and FYVE domain containing 4 (RUFY4), transcript variant 1, mRNA [NM_198483]                                 |
| A_23_P23292   | 0,011359981 | down | -1,8885309 | RXRG       | Homo sapiens retinoid X receptor, gamma (RXRG), transcript variant 1, mRNA [NM_006917]                                        |
| A_33_P3409086 | 0,016069941 | down | -1,9586259 | S100A1     | Homo sapiens S100 calcium binding protein A1 (S100A1), mRNA [NM_006271]                                                       |
| A_23_P143526  | 0,01568885  | down | -1,7065295 | S100B      | Homo sapiens S100 calcium binding protein B (S100B), mRNA [NM_006272]                                                         |
| A_21_P0014499 | 0,04908468  | down | -1,8375996 | SACS-AS1   | Homo sapiens SACS antisense RNA 1 (SACS-AS1), long non-coding RNA [NR_103450]                                                 |
| A_23_P5853    | 0,017460572 | down | -1,6240827 | SAG        | Homo sapiens S-antigen; retina and pineal gland (arrestin) (SAG), mRNA [NM_000541]                                            |
| A_23_P21943   | 5,22E-04    | down | -2,4187655 | SAGE1      | Homo sapiens sarcoma antigen 1 (SAGE1), mRNA [NM_018666]                                                                      |
| A_23_P349025  | 0,012938356 | down | -1,5576007 | SAMD15     | Homo sapiens sterile alpha motif domain containing 15 (SAMD15), mRNA [NM_001010860]                                           |
| A_24_P383523  | 0,032800946 | up   | 1,6207551  | SAMD4A     | Homo sapiens sterile alpha motif domain containing 4A (SAMD4A), transcript variant 1, mRNA [NM_015589]                        |
| A_33_P3344292 | 0,026692951 | down | -1,917629  | SAMD4A     | sterile alpha motif domain containing 4A [Source:HGNC Symbol;Acc:HGNC:23023] [ENST00000554335]                                |
| A_24_P6449    | 0,02592097  | down | -1,9460803 | SAMD7      | sterile alpha motif domain containing 7 [Source:HGNC Symbol;Acc:HGNC:25394] [ENST00000487910]                                 |
| A_33_P3370763 | 0,022473752 | down | -1,9249504 | SARM1      | Homo sapiens sterile alpha and TIR motif containing 1 (SARM1), mRNA [NM_015077]                                               |
| A_23_P94103   | 0,03416655  | up   | 1,9073746  | SCARA5     | Homo sapiens scavenger receptor class A, member 5 (SCARA5), mRNA [NM_173833]                                                  |
| A_24_P210569  | 0,01826427  | down | -2,189779  | SCG3       | Homo sapiens secretogranin III (SCG3), transcript variant 1, mRNA [NM_013243]                                                 |
| A_33_P3340869 | 6,46E-04    | down | -2,163698  | SCGB1B2P   | Homo sapiens secretoglobin, family 1B, member 2, pseudogene (SCGB1B2P), non-coding RNA [NR_027620]                            |
| A_23_P150555  | 0,024509488 | down | -2,2670386 | SCGB1D2    | Homo sapiens secretoglobin, family 1D, member 2 (SCGB1D2), mRNA [NM_006551]                                                   |
| A_24_P223018  | 0,04327273  | down | -1,6534114 | SCN11A     | Homo sapiens sodium channel, voltage gated, type XI alpha subunit (SCN11A), transcript variant 1, mRNA [NM_014139]            |
| A_23_P79015   | 0,022667388 | down | -2,3576698 | SCN1B      | Homo sapiens sodium channel, voltage gated, type I beta subunit (SCN1B), transcript variant b, mRNA [NM_199037]               |
| A_33_P3394699 | 0,011821868 | down | -1,8345557 | SCN2B      | sodium channel, voltage-gated, type II, beta subunit [Source:HGNC Symbol;Acc:HGNC:10589] [ENST00000278947]                    |
| A_32_P187571  | 0,036437433 | down | -1,8836282 | SCN2B      | Homo sapiens sodium channel, voltage gated, type II beta subunit (SCN2B), mRNA [NM_004588]                                    |
| A_24_P792124  | 0,006706269 | down | -2,949434  | SCN9A      | Homo sapiens sodium channel, voltage gated, type IX alpha subunit (SCN9A), mRNA [NM_002977]                                   |
| A_23_P46412   | 0,004065272 | down | -1,7652537 | SCNN1D     | Homo sapiens sodium channel, non voltage gated 1 delta subunit (SCNN1D), transcript variant 1, mRNA [NM_001130413]            |
| A_33_P3230990 | 0,002914288 | down | -1,8658291 | SCUBE1     | Homo sapiens signal peptide, CUB domain, EGF-like 1 (SCUBE1), mRNA [NM_173050]                                                |
| A_33_P3371219 | 0,02899139  | down | -1,5448829 | SDC2       | Homo sapiens syndecan 2 (SDC2), mRNA [NM_002998]                                                                              |
| A_21_P0000891 | 0,026608245 | down | -1,5076152 | SDCBP2-AS1 | Homo sapiens SDCBP2 antisense RNA 1 (SDCBP2-AS1), transcript variant 1, long non-coding RNA [NR_040047]                       |
| A_23_P2645    | 0,013407113 | down | -2,7873142 | SDS        | Homo sapiens serine dehydratase (SDS), mRNA [NM_006843]                                                                       |
| A_33_P3421053 | 0,015919976 | down | -1,6199515 | SELE       | Homo sapiens selectin E (SELE), mRNA [NM_000450]                                                                              |
| A_33_P3339100 | 0,04074181  | down | -1,7279708 | SELP       | Homo sapiens selectin P (granule membrane protein 140kDa, antigen CD62) (SELP), mRNA [NM_003005]                              |
| A_33_P3243138 | 0,04191208  | down | -2,2884147 | SELV       | Homo sapiens selenoprotein V (SELV), mRNA [NM_182704]                                                                         |
| A_33_P3263651 | 0,007370222 | down | -2,925967  | SEMA6B     | Homo sapiens sema domain, transmembrane domain (TM), and cytoplasmic domain, (semaphorin) 6B (SEMA6B), mRNA [NM_0321]         |
| A_21_P0013419 | 0,020110438 | down | -1,9440056 | SEPT7-AS1  | SEPT7 antisense RNA 1 (head to head) [Source:HGNC Symbol;Acc:HGNC:51153] [ENST00000424194]                                    |
| A_23_P117363  | 0,02775725  | down | -1,6676384 | SERPINA6   | Homo sapiens serpin peptidase inhibitor, clade A (alpha-1 antiproteinase, antitrypsin), member 6 (SERPINA6), mRNA [NM_001756] |
| A_33_P3413993 | 0,016059466 | down | -1,6616057 | SERPING1   | serpin peptidase inhibitor, clade G (C1 inhibitor), member 1 [Source:HGNC Symbol;Acc:HGNC:1228] [ENST00000405496]             |
| A_33_P3374076 | 0,003019857 | down | -2,1672196 | SEZ6       | Homo sapiens seizure related 6 homolog (mouse) (SEZ6), transcript variant 2, mRNA [NM_001098635]                              |
| A_33_P3387455 | 0,022483964 | down | -1,5039475 | SFMBT2     | Homo sapiens Scm-like with four mbt domains 2 (SFMBT2), transcript variant 1, mRNA [NM_001029880]                             |
| A_23_P62881   | 0,036320515 | down | -2,7144587 | SGIP1      | Homo sapiens SH3-domain GRB2-like (endophilin) interacting protein 1 (SGIP1), mRNA [NM_032291]                                |
| A_32_P527371  | 0,015741695 | down | -2,8667238 | SGSM1      | small G protein signaling modulator 1 [Source:HGNC Symbol;Acc:HGNC:29410] [ENST00000480523]                                   |
| A_24_P203103  | 0,030777708 | down | -1,8644733 | SH2D1A     | Homo sapiens SH2 domain containing 1A (SH2D1A), transcript variant 1, mRNA [NM_002351]                                        |
| A_21_P0000575 | 0,010813881 | down | -1,5378398 | SH3RF3-AS1 | Homo sapiens SH3RF3 antisense RNA 1 (SH3RF3-AS1), long non-coding RNA [NR_029193]                                             |
| A_23_P208636  | 0,016278734 | down | -2,7216    | SHANK1     | Homo sapiens SH3 and multiple ankyrin repeat domains 1 (SHANK1), mRNA [NM_016148]                                             |
| A_21_P0000018 | 0,03708357  | down | -2,3851333 | SHBG       | Homo sapiens sex hormone-binding globulin (SHBG), transcript variant 4, mRNA [NM_001146281]                                   |
| A_23_P115573  | 5,64E-04    | down | -1,7605057 | SHISA4     | Homo sapiens shisa family member 4 (SHISA4), transcript variant 1, mRNA [NM_198149]                                           |
| A_23_P17481   | 0,004950251 | down | -1,779463  | SIGLEC1    | Homo sapiens sialic acid binding Ig-like lectin 1, sialoadhesin (SIGLEC1), mRNA [NM_023068]                                   |
| A_23_P164596  | 0,019069891 | down | -1,9004545 | SIGLEC12   | Homo sapiens sialic acid binding Ig-like lectin 12 (gene/pseudogene) (SIGLEC12), transcript variant 1, mRNA [NM_053003]       |
| A_33_P3382498 | 0,047635347 | down | -1,8773823 | SIGLEC14   | Homo sapiens sialic acid binding Ig-like lectin 14 (SIGLEC14), mRNA [NM_001098612]                                            |

|               |             |      |            |              |                                                                                                                                                         |
|---------------|-------------|------|------------|--------------|---------------------------------------------------------------------------------------------------------------------------------------------------------|
| A_32_P80816   | 0,022218926 | down | -1,5690434 | SIGLECL1     | Homo sapiens SIGLEC family like 1 (SIGLECL1), transcript variant 1, mRNA [NM_173635]                                                                    |
| A_23_P301886  | 0,019425863 | down | -1,5216206 | SIM2         | Homo sapiens single-minded family bHLH transcription factor 2 (SIM2), transcript variant SIM2s, mRNA [NM_009586]                                        |
| A_23_P17456   | 0,013554475 | down | -1,6302507 | SIRPB1       | Homo sapiens signal-regulatory protein beta 1 (SIRPB1), transcript variant 1, mRNA [NM_006065]                                                          |
| A_33_P3356577 | 0,023766683 | down | -1,943252  | SIRPB1       | signal-regulatory protein beta 1 [Source:HGNC Symbol;Acc:HGNC:15928] [ENST00000381596]                                                                  |
| A_21_P0012133 | 0,001266331 | down | -2,9247816 | SIRPB2       | signal-regulatory protein beta 2 [Source:HGNC Symbol;Acc:HGNC:16247] [ENST00000486775]                                                                  |
| A_23_P43369   | 0,009741781 | down | -1,8951069 | SIT1         | Homo sapiens signaling threshold regulating transmembrane adaptor 1 (SIT1), mRNA [NM_014450]                                                            |
| A_24_P34611   | 0,014306084 | down | -1,7785677 | SIX3         | Homo sapiens SIX homeobox 3 (SIX3), mRNA [NM_005413]                                                                                                    |
| A_21_P0002046 | 0,022115024 | down | -2,3738728 | SIX3-AS1     | Homo sapiens SIX3 antisense RNA 1 (SIX3-AS1), transcript variant 1, long non-coding RNA [NR_103785]                                                     |
| A_33_P3352827 | 0,04088375  | down | -1,5143107 | SLAMF1       | Homo sapiens signaling lymphocytic activation molecule family member 1 (SLAMF1), transcript variant 1, mRNA [NM_003037]                                 |
| A_23_P355377  | 0,026464036 | down | -1,9830261 | SLC12A5      | Homo sapiens solute carrier family 12 (potassium/chloride transporter), member 5 (SLC12A5), transcript variant 2, mRNA [NM_02070]                       |
| A_33_P3210399 | 0,038037594 | down | -1,8543372 | SLC14A1      | Homo sapiens solute carrier family 14 (urea transporter), member 1 (Kidd blood group) (SLC14A1), transcript variant 4, mRNA [NM_0010399]                |
| A_23_P363313  | 0,033226755 | down | -1,6353767 | SLC16A11     | Homo sapiens solute carrier family 16, member 11 (SLC16A11), mRNA [NM_153357]                                                                           |
| A_23_P42189   | 0,03699989  | down | -1,5042356 | SLC17A1      | Homo sapiens solute carrier family 17 (organic anion transporter), member 1 (SLC17A1), mRNA [NM_005074]                                                 |
| A_23_P255695  | 0,029835057 | down | -2,376025  | SLC17A3      | Homo sapiens solute carrier family 17 (organic anion transporter), member 3 (SLC17A3), transcript variant 2, mRNA [NM_006632]                           |
| A_23_P24294   | 0,04997865  | down | -1,6079974 | SLC17A6      | Homo sapiens solute carrier family 17 (vesicular glutamate transporter), member 6 (SLC17A6), mRNA [NM_020346]                                           |
| A_24_P350759  | 0,045736626 | down | -2,0317166 | SLC1A2       | Homo sapiens solute carrier family 1 (glial high affinity glutamate transporter), member 2 (SLC1A2), transcript variant 1, mRNA [NM_001039752]          |
| A_23_P161968  | 0,012990549 | down | -2,0607798 | SLC22A10     | Homo sapiens solute carrier family 22, member 10 (SLC22A10), mRNA [NM_001039752]                                                                        |
| A_23_P111395  | 0,028384248 | down | -1,834713  | SLC22A2      | Homo sapiens solute carrier family 22 (organic cation transporter), member 2 (SLC22A2), mRNA [NM_003058]                                                |
| A_23_P98616   | 0,007975384 | up   | 1,9063076  | SLC22A6      | Homo sapiens solute carrier family 22 (organic anion transporter), member 6 (SLC22A6), transcript variant 3, mRNA [NM_153277]                           |
| A_24_P304311  | 0,024703661 | down | -1,5111704 | SLC22A8      | Homo sapiens solute carrier family 22 (organic anion transporter), member 8 (SLC22A8), transcript variant 1, mRNA [NM_004254]                           |
| A_23_P21990   | 0,021435626 | down | -2,3075705 | SLC23A1      | Homo sapiens solute carrier family 23 (ascorbic acid transporter), member 1 (SLC23A1), transcript variant 2, mRNA [NM_152685]                           |
| A_33_P3390637 | 0,001712626 | down | -2,0518823 | SLC23A3      | Homo sapiens solute carrier family 23, member 3 (SLC23A3), transcript variant 1, mRNA [NM_144712]                                                       |
| A_23_P92650   | 0,008077113 | down | -2,16979   | SLC25A2      | Homo sapiens solute carrier family 25 (mitochondrial carrier; ornithine transporter) member 2 (SLC25A2), mRNA [NM_031947]                               |
| A_33_P3378634 | 0,010233933 | down | -1,6054789 | SLC25A30-AS1 | Homo sapiens SLC25A30 antisense RNA 1 (SLC25A30-AS1), long non-coding RNA [NR_047031]                                                                   |
| A_33_P3357853 | 0,036125734 | down | -1,5698785 | SLC25A48     | solute carrier family 25, member 48 [Source:HGNC Symbol;Acc:HGNC:30451] [ENST00000274513]                                                               |
| A_33_P3400700 | 0,034226507 | down | -1,6804116 | SLC26A5      | Homo sapiens solute carrier family 26 (anion exchanger), member 5 (SLC26A5), transcript variant d, mRNA [NM_206885]                                     |
| A_23_P14667   | 0,021093618 | down | -2,6855488 | SLC28A1      | Homo sapiens solute carrier family 28 (concentrative nucleoside transporter), member 1 (SLC28A1), transcript variant 1, mRNA [NM_001039752]             |
| A_24_P405705  | 0,029763723 | down | -1,5351261 | SLC2A2       | Homo sapiens solute carrier family 2 (facilitated glucose transporter), member 2 (SLC2A2), transcript variant 1, mRNA [NM_000340]                       |
| A_23_P58729   | 0,009434443 | down | -2,8295608 | SLC34A1      | Homo sapiens solute carrier family 34 (type II sodium/phosphate cotransporter), member 1 (SLC34A1), transcript variant 1, mRNA [NM_001039752]           |
| A_33_P3780983 | 0,029410128 | down | -1,6129428 | SLC34A3      | Homo sapiens solute carrier family 34 (type II sodium/phosphate cotransporter), member 3 (SLC34A3), transcript variant 2, mRNA [NM_001039752]           |
| A_23_P31996   | 0,029256124 | down | -1,7108716 | SLC46A2      | Homo sapiens solute carrier family 46, member 2 (SLC46A2), mRNA [NM_033051]                                                                             |
| A_33_P3403399 | 0,037178632 | down | -1,6168706 | SLC47A1      | Homo sapiens solute carrier family 47 (multidrug and toxin extrusion), member 1 (SLC47A1), mRNA [NM_018242]                                             |
| A_24_P142503  | 0,006304974 | down | -2,2221107 | SLC47A1      | Homo sapiens solute carrier family 47 (multidrug and toxin extrusion), member 1 (SLC47A1), mRNA [NM_018242]                                             |
| A_33_P3400217 | 0,022825863 | down | -2,310932  | SLC4A1       | Homo sapiens solute carrier family 4 (anion exchanger), member 1 (Diego blood group) (SLC4A1), mRNA [NM_000342]                                         |
| A_24_P930111  | 0,01632282  | down | -1,7870566 | SLC4A10      | Homo sapiens solute carrier family 4, sodium bicarbonate transporter, member 10 (SLC4A10), transcript variant 2, mRNA [NM_02205]                        |
| A_24_P242581  | 0,0472428   | down | -1,5385278 | SLC5A9       | Homo sapiens solute carrier family 5 (sodium/sugar cotransporter), member 9 (SLC5A9), transcript variant 2, mRNA [NM_001011547]                         |
| A_24_P212234  | 0,012272978 | down | -2,2397532 | SLC6A18      | Homo sapiens solute carrier family 6 (neutral amino acid transporter), member 18 (SLC6A18), mRNA [NM_182632]                                            |
| A_24_P24770   | 0,010167176 | down | -2,4188416 | SLC9C1       | Homo sapiens solute carrier family 9, subfamily C (Na <sup>+</sup> -transporting carboxylic acid decarboxylase), member 1 (SLC9C1), mRNA [NM_001039752] |
| A_32_P485915  | 0,023882182 | down | -1,8074466 | SLC9C2       | Homo sapiens solute carrier family 9, member C2 (putative) (SLC9C2), mRNA [NM_178527]                                                                   |
| A_33_P3261468 | 0,024255997 | down | -1,5493028 | SLFN12L      | Homo sapiens schlafen family member 12-like (SLFN12L), mRNA [NM_001195790]                                                                              |
| A_33_P3358049 | 0,007637858 | down | -2,1126182 | SLFN14       | Homo sapiens schlafen family member 14 (SLFN14), mRNA [NM_001129820]                                                                                    |
| A_33_P3411021 | 0,023191443 | down | -2,4643996 | SLIT1        | Homo sapiens slit homolog 1 (Drosophila), mRNA (cDNA clone IMAGE:5247200), with apparent retained intron. [BC028105]                                    |
| A_21_P0000767 | 0,032174986 | down | -1,5992131 | SLIT1-AS1    | Homo sapiens SLIT1 antisense RNA 1 (SLIT1-AS1), long non-coding RNA [NR_038330]                                                                         |
| A_24_P66605   | 0,03905139  | down | -1,6498523 | SLITRK2      | Homo sapiens SLIT and NTRK-like family, member 2 (SLITRK2), transcript variant 1, mRNA [NM_032539]                                                      |
| A_33_P3230189 | 0,0163531   | down | -1,5824893 | SLITRK6      | Homo sapiens SLIT and NTRK-like family, member 6 (SLITRK6), mRNA [NM_032229]                                                                            |
| A_33_P3877739 | 0,034608416 | down | -1,8168641 | SMCR2        | ag52h12.x5 Gessler Wilms tumor Homo sapiens cDNA clone IMAGE:1126631 3', mRNA sequence [A1821758]                                                       |
| A_33_P3442301 | 0,005258334 | down | -2,9398596 | SMG1P3       | 602363146F1 NIH_MGC_90 Homo sapiens cDNA clone IMAGE:4471450 5', mRNA sequence [BG250912]                                                               |
| A_21_P0011718 | 0,02753268  | down | -1,5028747 | SMIM17       | Homo sapiens small integral membrane protein 17 (SMIM17), mRNA [NM_001193628]                                                                           |
| A_21_P0000170 | 0,023633376 | down | -1,593824  | SMIM18       | Homo sapiens small integral membrane protein 18 (SMIM18), mRNA [NM_001206847]                                                                           |

|                |             |      |            |             |                                                                                                                               |
|----------------|-------------|------|------------|-------------|-------------------------------------------------------------------------------------------------------------------------------|
| A_23_P151361   | 0,028034547 | down | -2,04211   | SMIM2       | Homo sapiens small integral membrane protein 2 (SMIM2), mRNA [NM_024058]                                                      |
| A_19_P00810806 | 0,009850499 | down | -1,8672627 | SMIM2-AS1   | Homo sapiens SMIM2 antisense RNA 1 (SMIM2-AS1), transcript variant 1, long non-coding RNA [NR_104064]                         |
| A_24_P555066   | 0,010583305 | down | -1,7624078 | SMTNL2      | Homo sapiens smoothelin-like 2 (SMTNL2), transcript variant 2, mRNA [NM_198501]                                               |
| A_24_P389285   | 0,032019325 | down | -1,6541474 | SND1-IT1    | Homo sapiens SND1 intronic transcript 1 (non-protein coding) (SND1-IT1), long non-coding RNA [NR_027330]                      |
| A_33_P3711426  | 0,028850287 | down | -1,5505359 | SNHG8       | AGENCOURT_6644733 NIH_MGC_122 Homo sapiens cDNA clone IMAGE:5766924 5', mRNA sequence [BM926530]                              |
| A_21_P0000327  | 0,004324663 | down | -1,7134421 | SNORA71E    | Homo sapiens small nucleolar RNA, H/ACA box 71E (SNORA71E), small nucleolar RNA [NR_002972]                                   |
| A_33_P3579391  | 0,0441276   | down | -1,516591  | SNORA77     | DB361496 MAMMA1 Homo sapiens cDNA clone MAMMA1001810 3', mRNA sequence [DB361496]                                             |
| A_33_P3604591  | 0,020365998 | down | -1,5485392 | SNORA78     | qj88d05.x1 NCI_CGAP_Kid3 Homo sapiens cDNA clone IMAGE:1866537 3', mRNA sequence [AI271839]                                   |
| A_21_P0000457  | 0,013652135 | down | -1,9589225 | SNORD115-27 | Homo sapiens small nucleolar RNA, C/D box 115-27 (SNORD115-27), small nucleolar RNA [NR_003496]                               |
| A_21_P0000441  | 0,045578953 | up   | 1,74759    | SNORD115-5  | Homo sapiens small nucleolar RNA, C/D box 115-5 (SNORD115-5), small nucleolar RNA [NR_003297]                                 |
| A_33_P3414967  | 0,042055704 | down | -1,5740342 | SNTG1       | Homo sapiens syntrophin, gamma 1 (SNTG1), transcript variant 1, mRNA [NM_018967]                                              |
| A_23_P251132   | 0,01099353  | down | -2,4376757 | SNTG2       | Homo sapiens syntrophin, gamma 2 (SNTG2), mRNA [NM_018968]                                                                    |
| A_24_P13831    | 0,008098613 | down | -1,9385316 | SNX20       | Homo sapiens sorting nexin 20 (SNX20), transcript variant 1, mRNA [NM_182854]                                                 |
| A_33_P3284453  | 0,021567157 | down | -1,985824  | SOGA3       | Homo sapiens SOGA family member 3 (SOGA3), mRNA [NM_001012279]                                                                |
| A_24_P307964   | 0,045259863 | down | -2,1442137 | SOHLH1      | Homo sapiens spermatogenesis and oogenesis specific basic helix-loop-helix 1 (SOHLH1), transcript variant 2, mRNA [NM_001012] |
| A_21_P0000167  | 0,04515371  | down | -1,5759147 | SORCS1      | Homo sapiens sortilin-related VPS10 domain containing receptor 1 (SORCS1), transcript variant 5, mRNA [NM_001206571]          |
| A_33_P3414192  | 0,020702502 | down | -2,2150536 | SORCS1      | Homo sapiens sortilin-related VPS10 domain containing receptor 1 (SORCS1), transcript variant 6, mRNA [NM_001206572]          |
| A_23_P434416   | 0,040382847 | down | -1,5515503 | SOX1        | Homo sapiens SRY (sex determining region Y)-box 1 (SOX1), mRNA [NM_005986]                                                    |
| A_23_P80662    | 0,036862474 | down | -1,5133303 | SOX14       | Homo sapiens SRY (sex determining region Y)-box 14 (SOX14), mRNA [NM_004189]                                                  |
| A_33_P3226761  | 0,032501493 | down | -1,56753   | SOX18       | Homo sapiens SRY (sex determining region Y)-box 18 (SOX18), mRNA [NM_018419]                                                  |
| A_24_P756289   | 0,0130065   | down | -1,5947951 | SOX2-OT     | Homo sapiens SOX2 overlapping transcript (SOX2-OT), transcript variant 1, long non-coding RNA [NR_075091]                     |
| A_23_P85218    | 0,017003726 | down | -4,103596  | SOX3        | Homo sapiens SRY (sex determining region Y)-box 3 (SOX3), mRNA [NM_005634]                                                    |
| A_23_P69970    | 0,022561891 | down | -1,6421124 | SOX30       | Homo sapiens SRY (sex determining region Y)-box 30 (SOX30), transcript variant 1, mRNA [NM_178424]                            |
| A_23_P317729   | 0,033817295 | down | -1,61861   | SP7         | Homo sapiens Sp7 transcription factor (SP7), transcript variant 2, mRNA [NM_152860]                                           |
| A_33_P3383184  | 0,024169628 | down | -1,562946  | SP9         | Sp9 transcription factor [Source:HGNC Symbol;Acc:HGNC:30690] [ENST00000394967]                                                |
| A_24_P272254   | 0,014332896 | down | -1,525989  | SPACA5      | Homo sapiens sperm acrosome associated 5 (SPACA5), mRNA [NM_205856]                                                           |
| A_23_P65302    | 0,027455894 | down | -1,5659392 | SPACA7      | Homo sapiens sperm acrosome associated 7 (SPACA7), mRNA [NM_145248]                                                           |
| A_23_P324319   | 0,01768081  | down | -2,1850088 | SPAG11B     | Homo sapiens sperm associated antigen 11B (SPAG11B), transcript variant C, mRNA [NM_058203]                                   |
| A_33_P3346966  | 0,049103294 | down | -1,8825275 | SPAG16      | Homo sapiens sperm associated antigen 16 (SPAG16), transcript variant 1, mRNA [NM_024532]                                     |
| A_21_P0006840  | 0,021653082 | down | -1,5073831 | SPAG6       | sperm associated antigen 6 [Source:HGNC Symbol;Acc:HGNC:11215] [ENST00000487973]                                              |
| A_23_P329956   | 0,045111276 | down | -1,5097711 | SPATA3      | Homo sapiens spermatogenesis associated 3 (SPATA3), mRNA [NM_139073]                                                          |
| A_21_P0001802  | 0,019296184 | down | -1,6256552 | SPATA3-AS1  | Homo sapiens SPATA3 antisense RNA 1 (head to head) (SPATA3-AS1), long non-coding RNA [NR_033879]                              |
| A_21_P0001801  | 0,026842715 | down | -1,6465759 | SPATA3-AS1  | Homo sapiens SPATA3 antisense RNA 1 (head to head) (SPATA3-AS1), long non-coding RNA [NR_033879]                              |
| A_33_P3217364  | 0,02341446  | down | -2,2228775 | SPATA31A3   | Homo sapiens SPATA31 subfamily A, member 3 (SPATA31A3), mRNA [NM_001083124]                                                   |
| A_33_P3242609  | 0,014653626 | down | -1,634781  | SPATA31D1   | Homo sapiens SPATA31 subfamily D, member 1 (SPATA31D1), mRNA [NM_001001670]                                                   |
| A_33_P3239242  | 0,018988892 | down | -1,5935154 | SPATA6      | Homo sapiens spermatogenesis associated 6 (SPATA6), transcript variant 1, mRNA [NM_019073]                                    |
| A_32_P217390   | 0,02975649  | up   | 1,7394167  | SPATA8      | Homo sapiens spermatogenesis associated 8 (SPATA8), mRNA [NM_173499]                                                          |
| A_33_P3276450  | 0,033931054 | down | -1,5588677 | SPATC1      | Homo sapiens spermatogenesis and centriole associated 1 (SPATC1), transcript variant 1, mRNA [NM_198572]                      |
| A_19_P00806499 | 0,012199066 | down | -2,5847063 | SPG20-AS1   | Homo sapiens SPG20 antisense RNA 1 (SPG20-AS1), transcript variant 1, long non-coding RNA [NR_045180]                         |
| A_32_P148275   | 0,017867608 | down | -1,9993777 | SPIC        | Homo sapiens Spi-C transcription factor (Spi-1/PU.1 related) (SPIC), mRNA [NM_152323]                                         |
| A_33_P3388006  | 0,022059584 | up   | 1,6597683  | SPICE1      | Homo sapiens spindle and centriole associated protein 1 (SPICE1), mRNA [NM_144718]                                            |
| A_33_P3239620  | 0,04304656  | down | -2,234494  | SPINT3      | Homo sapiens serine peptidase inhibitor, Kunitz type, 3 (SPINT3), mRNA [NM_006652]                                            |
| A_32_P142779   | 0,012638428 | down | -2,3252904 | SPPL2C      | Homo sapiens signal peptide peptidase like 2C (SPPL2C), mRNA [NM_175882]                                                      |
| A_33_P3401981  | 0,013331353 | up   | 2,2982929  | SPRED3      | Homo sapiens sprouty-related, EVH1 domain containing 3 (SPRED3), transcript variant 1, mRNA [NM_001042522]                    |
| A_33_P3338423  | 0,04898628  | down | -1,7929358 | SPRY4       | Homo sapiens sprouty homolog 4 (Drosophila) (SPRY4), transcript variant 3, mRNA [NM_001293289]                                |
| A_21_P0014846  | 0,012128036 | down | -1,7351543 | SRGAP3-AS3  | Homo sapiens SRGAP3 antisense RNA 3 (SRGAP3-AS3), long non-coding RNA [NR_103443]                                             |
| A_33_P3393200  | 9,40E-04    | down | 2,0401747  | SRRM4       | Homo sapiens serine/arginine repetitive matrix 4 (SRRM4), mRNA [NM_194286]                                                    |
| A_33_P3393931  | 4,34E-04    | down | -3,198034  | SSBP3-AS1   | Homo sapiens SSBP3 antisense RNA 1 (SSBP3-AS1), long non-coding RNA [NR_103541]                                               |
| A_23_P33875    | 0,03749426  | down | -1,6057633 | SSX4B       | Homo sapiens synovial sarcoma, X breakpoint 4B (SSX4B), transcript variant 1, mRNA [NM_001034832]                             |

|               |             |      |            |              |                                                                                                                                 |
|---------------|-------------|------|------------|--------------|---------------------------------------------------------------------------------------------------------------------------------|
| A_21_P0000162 | 0,043983694 | down | -1,5549469 | SSX6         | synovial sarcoma, X breakpoint 6 (pseudogene) [Source:HGNC Symbol;Acc:HGNC:19652] [ENST00000412590]                             |
| A_23_P431923  | 0,017879179 | down | -2,0143034 | SSX8         | Homo sapiens synovial sarcoma, X breakpoint 8 (SSX8), non-coding RNA [NR_027250]                                                |
| A_23_P429425  | 0,025924178 | down | -1,9006276 | ST6GAL2      | Homo sapiens ST6 beta-galactosamide alpha-2,6-sialyltransferase 2 (ST6GAL2), transcript variant 1, mRNA [NM_032528]             |
| A_24_P664850  | 0,02258923  | down | -2,2057276 | ST8SIA2      | Homo sapiens ST8 alpha-N-acetyl-neuraminide alpha-2,8-sialyltransferase 2 (ST8SIA2), mRNA [NM_006011]                           |
| A_23_P162607  | 6,94E-04    | down | -3,8409832 | STAB2        | Homo sapiens stabilin 2 (STAB2), mRNA [NM_017564]                                                                               |
| A_33_P3365760 | 0,00873082  | down | -2,2722902 | STAP1        | Homo sapiens signal transducing adaptor family member 1 (STAP1), mRNA [NM_012108]                                               |
| A_24_P214231  | 0,040103983 | down | -1,7594398 | STIL         | Homo sapiens SCL/TAL1 interrupting locus (STIL), transcript variant 1, mRNA [NM_001048166]                                      |
| A_32_P85676   | 0,028793484 | down | -1,5987798 | STK32B       | Homo sapiens serine/threonine kinase 32B (STK32B), mRNA [NM_018401]                                                             |
| A_32_P126229  | 0,014228804 | down | -2,0438733 | STMND1       | Homo sapiens stathmin domain containing 1 (STMND1), mRNA [NM_001190766]                                                         |
| A_33_P3357935 | 0,001949755 | down | -1,6140078 | STRC         | Homo sapiens stereocilin (STRC), mRNA [NM_153700]                                                                               |
| A_33_P3212456 | 0,035511613 | up   | 1,9275006  | STX1A        | Homo sapiens syntaxin 1A (brain) (STX1A), transcript variant 2, mRNA [NM_001165903]                                             |
| A_23_P418785  | 0,03741636  | down | -1,7757784 | STXBP5L      | Homo sapiens syntaxin binding protein 5-like (STXBP5L), mRNA [NM_014980]                                                        |
| A_21_P0002970 | 0,03441257  | down | -1,66391   | SUCLG2-AS1   | Homo sapiens SUCLG2 antisense RNA 1 (head to head) (SUCLG2-AS1), transcript variant 1, long non-coding RNA [NR_109992]          |
| A_23_P145711  | 0,03152687  | down | -1,7065339 | SUGCT        | Homo sapiens succinyl-CoA:glutarate-CoA transferase (SUGCT), transcript variant 4, mRNA [NM_024728]                             |
| A_23_P147070  | 0,043297544 | up   | 1,500111   | SUN1         | Sad1 and UNC84 domain containing 1 [Source:HGNC Symbol;Acc:HGNC:18587] [ENST00000340926]                                        |
| A_23_P140050  | 0,02568759  | down | -1,5557477 | SUPT20H      | Homo sapiens suppressor of Ty 20 homolog (S. cerevisiae) (SUPT20H), transcript variant 2, mRNA [NM_017569]                      |
| A_33_P3347152 | 0,04633341  | down | -1,5735486 | SUPT3H       | suppressor of Ty 3 homolog (S. cerevisiae) [Source:HGNC Symbol;Acc:HGNC:11466] [ENST00000371458]                                |
| A_33_P3314301 | 0,003081162 | down | -2,9637141 | SV2C         | Homo sapiens synaptic vesicle glycoprotein 2C (SV2C), transcript variant 1, mRNA [NM_014979]                                    |
| A_23_P112982  | 0,03930959  | down | -1,670812  | SVOP         | Homo sapiens SV2 related protein homolog (rat) (SVOP), mRNA [NM_018711]                                                         |
| A_23_P722     | 0,011971025 | down | -2,126776  | SYCP1        | Homo sapiens synaptonemal complex protein 1 (SYCP1), transcript variant 1, mRNA [NM_003176]                                     |
| A_23_P76374   | 0,025963977 | down | -2,016444  | SYCP3        | Homo sapiens synaptonemal complex protein 3 (SYCP3), transcript variant 2, mRNA [NM_153694]                                     |
| A_33_P3400239 | 0,016009161 | down | -2,0678427 | SYNDIG1      | PREDICTED: Homo sapiens synapse differentiation inducing 1 (SYNDIG1), transcript variant X1, mRNA [XM_006723626]                |
| A_23_P55917   | 0,006564947 | down | -2,0010567 | SYT3         | Homo sapiens synaptotagmin III (SYT3), transcript variant 1, mRNA [NM_032298]                                                   |
| A_23_P78849   | 0,030389708 | down | -1,6106217 | SYT5         | Homo sapiens synaptotagmin V (SYT5), transcript variant 1, mRNA [NM_003180]                                                     |
| A_33_P3277298 | 0,010476894 | down | -2,276835  | SYT6         | Homo sapiens synaptotagmin VI (SYT6), transcript variant 3, mRNA [NM_001270805]                                                 |
| A_33_P3373134 | 0,023886966 | down | -1,7469172 | SZT2         | Homo sapiens seizure threshold 2 homolog (mouse) (SZT2), mRNA [NM_015284]                                                       |
| A_33_P3253877 | 0,032428876 | down | -1,6475282 | TACC1        | transforming, acidic coiled-coil containing protein 1 [Source:HGNC Symbol;Acc:HGNC:11522] [ENST00000518415]                     |
| A_24_P376441  | 0,017705858 | up   | 1,5187011  | TAF5L        | Homo sapiens TAF5-like RNA polymerase II, p300/CBP-associated factor (PCAF)-associated factor, 65kDa (TAF5L), transcript varian |
| A_33_P3405769 | 6,09E-04    | down | -2,5182621 | TARM1        | Homo sapiens T cell-interacting, activating receptor on myeloid cells 1 (TARM1), mRNA [NM_001135686]                            |
| A_23_P416191  | 5,99E-04    | down | -2,2355773 | TAS2R31      | Homo sapiens taste receptor, type 2, member 31 (TAS2R31), mRNA [NM_176885]                                                      |
| A_23_P359746  | 0,029495725 | down | -1,6928108 | TAS2R38      | Homo sapiens taste receptor, type 2, member 38 (TAS2R38), mRNA [NM_176817]                                                      |
| A_23_P337867  | 0,019129733 | down | -1,8654202 | TAS2R41      | Homo sapiens taste receptor, type 2, member 41 (TAS2R41), mRNA [NM_176883]                                                      |
| A_23_P367013  | 0,034210492 | down | -1,915556  | TAS2R60      | Homo sapiens taste receptor, type 2, member 60 (TAS2R60), mRNA [NM_177437]                                                      |
| A_21_P0014430 | 0,04677206  | down | -2,0643628 | TBC1D22A-AS1 | Homo sapiens TBC1D22A antisense RNA 1 (TBC1D22A-AS1), long non-coding RNA [NR_122047]                                           |
| A_24_P896205  | 0,03571733  | down | -1,846406  | TBX2-AS1     | Homo sapiens TBX2 antisense RNA 1 (TBX2-AS1), transcript variant 1, long non-coding RNA [NR_125749]                             |
| A_23_P25176   | 0,03920474  | down | -2,0042367 | TBX5         | Homo sapiens T-box 5 (TBX5), transcript variant 1, mRNA [NM_000192]                                                             |
| A_33_P3424122 | 0,017793663 | down | -1,5505353 | TCHHL1       | Homo sapiens trichohyalin-like 1 (TCHHL1), mRNA [NM_001008536]                                                                  |
| A_23_P205348  | 0,033034436 | down | -1,6842132 | TCL6         | Homo sapiens T-cell leukemia/lymphoma 6 (non-protein coding) (TCL6), long non-coding RNA [NR_028288]                            |
| A_33_P3387164 | 0,04923833  | down | -2,036251  | TCP11        | Homo sapiens t-complex 11, testis-specific (TCP11), transcript variant 6, mRNA [NM_001261820]                                   |
| A_33_P3267248 | 0,024514845 | down | -1,5303752 | TDRD10       | Homo sapiens tudor domain containing 10 (TDRD10), transcript variant 2, mRNA [NM_182499]                                        |
| A_33_P3421664 | 0,029505037 | down | -1,9344068 | TDRD5        | Homo sapiens tudor domain containing 5 (TDRD5), transcript variant 1, mRNA [NM_001199085]                                       |
| A_24_P37712   | 0,013865687 | down | -1,9171915 | TEC          | Homo sapiens tec protein tyrosine kinase (TEC), mRNA [NM_003215]                                                                |
| A_23_P375354  | 0,01789843  | down | -1,9865586 | TECTA        | Homo sapiens tectorin alpha (TECTA), mRNA [NM_005422]                                                                           |
| A_23_P97826   | 0,0270659   | down | -1,583307  | TECTB        | Homo sapiens tectorin beta (TECTB), mRNA [NM_058222]                                                                            |
| A_23_P74723   | 0,014890608 | down | -1,685172  | TEX35        | Homo sapiens testis expressed 35 (TEX35), transcript variant 1, mRNA [NM_032126]                                                |
| A_24_P315056  | 0,014173012 | down | -1,791677  | TEX36        | Homo sapiens testis expressed 36 (TEX36), mRNA [NM_001128202]                                                                   |
| A_32_P120127  | 0,028518107 | down | -1,5341239 | TEX36-AS1    | Homo sapiens TEX36 antisense RNA 1 (TEX36-AS1), long non-coding RNA [NR_023362]                                                 |
| A_23_P432005  | 0,006189491 | down | -2,2041304 | TEX37        | Homo sapiens testis expressed 37 (TEX37), mRNA [NM_152670]                                                                      |
| A_24_P484965  | 0,018883005 | down | -1,6665107 | TEX41        | testis expressed 41 (non-protein coding) [Source:HGNC Symbol;Acc:HGNC:48667] [ENST00000423031]                                  |

|               |             |      |            |            |                                                                                                                             |
|---------------|-------------|------|------------|------------|-----------------------------------------------------------------------------------------------------------------------------|
| A_21_P0011860 | 0,034430943 | down | -1,7206877 | TEX41      | Homo sapiens testis expressed 41 (non-protein coding) (TEX41), long non-coding RNA [NR_033870]                              |
| A_24_P377124  | 0,015288389 | down | -1,9978459 | THPO       | Homo sapiens thrombopoietin (THPO), transcript variant 1, mRNA [NM_000460]                                                  |
| A_21_P0003309 | 0,012410848 | down | -2,8761206 | THPO       | Homo sapiens thrombopoietin (THPO), transcript variant 8, mRNA [NM_001290027]                                               |
| A_33_P3342056 | 0,002911164 | down | -2,5372047 | TIGIT      | Homo sapiens T cell immunoreceptor with Ig and ITIM domains (TIGIT), mRNA [NM_173799]                                       |
| A_33_P3235213 | 0,015364205 | down | -2,5404625 | TIGIT      | Homo sapiens T cell immunoreceptor with Ig and ITIM domains (TIGIT), mRNA [NM_173799]                                       |
| A_24_P201153  | 0,042924162 | up   | 1,5147619  | TJP2       | Homo sapiens tight junction protein 2 (TJP2), transcript variant 2, mRNA [NM_201629]                                        |
| A_33_P3274955 | 0,022220744 | down | -1,9257457 | TKTL2      | Homo sapiens transketolase-like 2 (TKTL2), mRNA [NM_032136]                                                                 |
| A_33_P3780311 | 0,025073512 | down | -1,7692645 | TLR8-AS1   | Homo sapiens TLR8 antisense RNA 1 (TLR8-AS1), long non-coding RNA [NR_030727]                                               |
| A_23_P114008  | 0,02951521  | down | -1,514669  | TM4SF20    | Homo sapiens transmembrane 4 L six family member 20 (TM4SF20), mRNA [NM_024795]                                             |
| A_23_P27107   | 0,003577291 | down | -3,6172636 | TM4SF5     | Homo sapiens transmembrane 4 L six family member 5 (TM4SF5), mRNA [NM_003963]                                               |
| A_32_P87649   | 0,0370746   | down | -2,2158432 | TMCO2      | Homo sapiens transmembrane and coiled-coil domains 2 (TMCO2), mRNA [NM_001008740]                                           |
| A_23_P254688  | 0,02878435  | down | -2,3979728 | TMEM108    | Homo sapiens transmembrane protein 108 (TMEM108), transcript variant 1, mRNA [NM_023943]                                    |
| A_23_P308839  | 0,03741295  | down | -1,7640392 | TMEM132D   | Homo sapiens transmembrane protein 132D (TMEM132D), mRNA [NM_133448]                                                        |
| A_23_P252082  | 0,006004837 | down | -1,7340733 | TMEM176A   | Homo sapiens transmembrane protein 176A (TMEM176A), mRNA [NM_018487]                                                        |
| A_33_P3226060 | 0,005579385 | down | -2,483791  | TMEM178B   | Homo sapiens transmembrane protein 178B (TMEM178B), mRNA [NM_001195278]                                                     |
| A_33_P3422248 | 0,002868369 | down | -1,7062064 | TMEM200C   | transmembrane protein 200C [Source:HGNC Symbol;Acc:HGNC:37208] [ENST00000581347]                                            |
| A_23_P26062   | 0,04506961  | down | -1,85466   | TMEM202    | Homo sapiens transmembrane protein 202 (TMEM202), mRNA [NM_001080462]                                                       |
| A_33_P3363341 | 0,022621458 | down | -1,5413668 | TMEM212    | Homo sapiens transmembrane protein 212 (TMEM212), mRNA [NM_001164436]                                                       |
| A_32_P489986  | 0,023459831 | down | -2,1372492 | TMEM232    | Homo sapiens transmembrane protein 232 (TMEM232), mRNA [NM_001039763]                                                       |
| A_23_P430747  | 0,015087839 | down | -1,5232787 | TMEM257    | Homo sapiens transmembrane protein 257 (TMEM257), mRNA [NM_004709]                                                          |
| A_23_P382240  | 0,038378276 | down | -1,5911989 | TMEM26     | Homo sapiens transmembrane protein 26 (TMEM26), mRNA [NM_178505]                                                            |
| A_23_P318938  | 0,028179064 | down | -2,0037775 | TMEM52B    | Homo sapiens transmembrane protein 52B (TMEM52B), transcript variant 1, mRNA [NM_153022]                                    |
| A_33_P3277611 | 0,001163601 | down | -1,8976617 | TMEM8C     | Homo sapiens transmembrane protein 8C (TMEM8C), mRNA [NM_001080483]                                                         |
| A_33_P3368776 | 0,029106585 | down | -1,5082635 | TMIGD1     | Homo sapiens transmembrane and immunoglobulin domain containing 1 (TMIGD1), mRNA [NM_206832]                                |
| A_33_P3286923 | 0,040494617 | up   | 1,6092532  | TMPRSS5    | Homo sapiens transmembrane protease, serine 5 (TMPRSS5), transcript variant 4, mRNA [NM_001288751]                          |
| A_21_P0010506 | 0,023786785 | down | -1,8435849 | TNFRSF14   | Homo sapiens tumor necrosis factor receptor superfamily, member 14 (TNFRSF14), transcript variant 1, mRNA [NM_003820]       |
| A_33_P3286157 | 0,02185078  | down | -1,5149355 | TNFRSF4    | Homo sapiens tumor necrosis factor receptor superfamily, member 4 (TNFRSF4), mRNA [NM_003327]                               |
| A_33_P3305571 | 0,029245658 | up   | 1,6943535  | TNFRSF6B   | Homo sapiens tumor necrosis factor receptor superfamily, member 6b, decoy (TNFRSF6B), mRNA [NM_003823]                      |
| A_24_P415680  | 0,020926481 | down | -1,7976235 | TNNI3K     | Homo sapiens TNNI3 interacting kinase (TNNI3K), mRNA [NM_015978]                                                            |
| A_23_P127824  | 0,006474461 | down | -2,5665646 | TNNT3      | Homo sapiens troponin T type 3 (skeletal, fast) (TNNT3), transcript variant 3, mRNA [NM_001042780]                          |
| A_32_P19000   | 0,035113588 | up   | 1,6654769  | TNRC6C-AS1 | Homo sapiens TNRC6C antisense RNA 1 (TNRC6C-AS1), long non-coding RNA [NR_040071]                                           |
| A_24_P911362  | 8,10E-04    | up   | 2,7653973  | TNXB       | tenascin XB [Source:HGNC Symbol;Acc:HGNC:11976] [ENST00000427181]                                                           |
| A_24_P307135  | 0,006712705 | down | -1,8947989 | TNXB       | Homo sapiens tenascin XB (TNXB), transcript variant XB, mRNA [NM_019105]                                                    |
| A_24_P117942  | 0,01944567  | down | -1,5644218 | TOMM20L    | Homo sapiens translocase of outer mitochondrial membrane 20 homolog (yeast)-like (TOMM20L), mRNA [NM_207377]                |
| A_33_P3247403 | 4,89E-04    | down | -2,3949142 | TOR3A      | Homo sapiens torsin family 3, member A (TOR3A), mRNA [NM_022371]                                                            |
| A_24_P413470  | 0,034744814 | down | -1,6178033 | TP73       | Homo sapiens tumor protein p73 (TP73), transcript variant 1, mRNA [NM_005427]                                               |
| A_23_P37702   | 0,030871052 | down | -1,8448529 | TPSAB1     | Homo sapiens tryptase alpha/beta 1 (TPSAB1), mRNA [NM_003294]                                                               |
| A_24_P118052  | 0,037084557 | down | -2,0904982 | TPTE2      | Homo sapiens transmembrane phosphoinositide 3-phosphatase and tensin homolog 2 (TPTE2), transcript variant 3, mRNA [NM_199] |
| A_23_P18518   | 0,035332363 | up   | 1,7811774  | TRAM1L1    | Homo sapiens translocation associated membrane protein 1-like 1 (TRAM1L1), mRNA [NM_152402]                                 |
| A_24_P942132  | 0,034116253 | down | -1,5879163 | TRAPPC6B   | Homo sapiens trafficking protein particle complex 6B (TRAPPC6B), transcript variant 1, mRNA [NM_001079537]                  |
| A_21_P0000178 | 0,028545864 | down | -1,6577682 | TREM1      | Homo sapiens triggering receptor expressed on myeloid cells 1 (TREM1), transcript variant 2, mRNA [NM_001242589]            |
| A_24_P170439  | 0,024402061 | down | -1,7213168 | TREML3P    | Homo sapiens triggering receptor expressed on myeloid cells-like 3, pseudogene (TREML3P), non-coding RNA [NR_027256]        |
| A_24_P655458  | 0,043449752 | down | -1,666827  | TREML4     | Homo sapiens triggering receptor expressed on myeloid cells-like 4 (TREML4), mRNA [NM_198153]                               |
| A_33_P3311493 | 0,017985418 | down | -2,043727  | TRHDE-AS1  | Homo sapiens TRHDE antisense RNA 1 (TRHDE-AS1), transcript variant 2, long non-coding RNA [NR_026836]                       |
| A_21_P0007724 | 0,018857677 | down | -2,6892905 | TRHDE-AS1  | Homo sapiens TRHDE antisense RNA 1 (TRHDE-AS1), transcript variant 1, long non-coding RNA [NR_026837]                       |
| A_33_P3271594 | 0,03771064  | down | -1,8189481 | TRIM54     | Homo sapiens tripartite motif containing 54 (TRIM54), transcript variant 1, mRNA [NM_032546]                                |
| A_33_P3220247 | 0,015958285 | down | -2,6647294 | TRIM6      | Homo sapiens tripartite motif containing 6 (TRIM6), transcript variant 1, mRNA [NM_001003818]                               |
| A_32_P429687  | 0,02452206  | down | -1,5121688 | TRIM72     | Homo sapiens tripartite motif containing 72, E3 ubiquitin protein ligase (TRIM72), mRNA [NM_001008274]                      |
| A_33_P3325748 | 0,033234823 | down | -1,7895725 | TRIOBP     | Homo sapiens TRIO and F-actin binding protein (TRIOBP), transcript variant 2, mRNA [NM_138632]                              |

|               |             |      |            |           |                                                                                                                                 |
|---------------|-------------|------|------------|-----------|---------------------------------------------------------------------------------------------------------------------------------|
| A_33_P3340014 | 0,009521623 | down | -1,9314481 | TRO       | Homo sapiens trophinin (TRO), transcript variant 3, mRNA [NM_016157]                                                            |
| A_33_P3330074 | 0,014877556 | down | -1,6581982 | TRPC2     | transient receptor potential cation channel, subfamily C, member 2, pseudogene [Source:HGNC Symbol;Acc:HGNC:12334] [ENST00      |
| A_23_P129225  | 0,048240725 | down | -1,5774928 | TRPM1     | Homo sapiens transient receptor potential cation channel, subfamily M, member 1 (TRPM1), transcript variant 2, mRNA [NM_002420] |
| A_23_P250694  | 0,023217982 | down | -1,756289  | TSGA13    | Homo sapiens testis specific, 13 (TSGA13), mRNA [NM_052933]                                                                     |
| A_24_P213643  | 0,020759711 | down | -1,855485  | TSPAN10   | Homo sapiens tetraspanin 10 (TSPAN10), transcript variant 2, mRNA [NM_031945]                                                   |
| A_24_P13083   | 0,015068628 | up   | 1,9005895  | TSPAN18   | Homo sapiens tetraspanin 18 (TSPAN18), mRNA [NM_130783]                                                                         |
| A_23_P40515   | 0,036352996 | down | -1,5586011 | TSSK2     | Homo sapiens testis-specific serine kinase 2 (TSSK2), mRNA [NM_053006]                                                          |
| A_23_P399681  | 0,03151081  | down | -1,5436629 | TSSK3     | Homo sapiens testis-specific serine kinase 3 (TSSK3), mRNA [NM_052841]                                                          |
| A_33_P3280811 | 0,003975987 | down | -1,6676342 | TTC16     | Homo sapiens tetratricopeptide repeat domain 16 (TTC16), mRNA [NM_144965]                                                       |
| A_23_P73150   | 0,046419665 | down | -1,800721  | TTC25     | Homo sapiens tetratricopeptide repeat domain 25 (TTC25), transcript variant 1, mRNA [NM_031421]                                 |
| A_33_P3385993 | 0,012815143 | down | -1,895446  | TTL9      | Homo sapiens tubulin tyrosine ligase-like family member 9 (TTL9), mRNA [NM_001008409]                                           |
| A_21_P0013907 | 0,017969057 | down | -1,8344084 | TTY10     | Homo sapiens testis-specific transcript, Y-linked 10 (non-protein coding) (TTY10), long non-coding RNA [NR_001542]              |
| A_24_P331693  | 0,02313415  | down | -1,82485   | TTY22     | Homo sapiens testis-specific transcript, Y-linked 22 (non-protein coding) (TTY22), long non-coding RNA [NR_001539]              |
| A_24_P340227  | 0,015995963 | down | -1,5865815 | TTY23     | Homo sapiens testis-specific transcript, Y-linked 23 (non-protein coding) (TTY23), long non-coding RNA [NR_001540]              |
| A_23_P171409  | 0,028324999 | down | -1,9723618 | TTY6      | Homo sapiens testis-specific transcript, Y-linked 6 (non-protein coding) (TTY6), long non-coding RNA [NR_001527]                |
| A_23_P434398  | 0,026975011 | down | -1,5758218 | TXLNB     | Homo sapiens taxilin beta (TXLNB), mRNA [NM_153235]                                                                             |
| A_33_P3344956 | 0,011818254 | down | -3,1964319 | TXNL1     | thioredoxin-like 1 [Source:HGNC Symbol;Acc:HGNC:12436] [ENST00000587807]                                                        |
| A_23_P312505  | 0,030452294 | down | -1,5068733 | TYR       | Homo sapiens tyrosinase (TYR), mRNA [NM_000372]                                                                                 |
| A_23_P6293    | 0,041261557 | down | -1,6167684 | UBASH3A   | Homo sapiens ubiquitin associated and SH3 domain containing A (UBASH3A), transcript variant 1, mRNA [NM_018961]                 |
| A_23_P365327  | 0,012106837 | down | -1,5911689 | UBE3D     | ubiquitin protein ligase E3D [Source:HGNC Symbol;Acc:HGNC:21381] [ENST00000369746]                                              |
| A_21_P0003740 | 0,036029145 | down | -1,7385359 | UCHL1-AS1 | Homo sapiens UCHL1 antisense RNA 1 (head to head) (UCHL1-AS1), long non-coding RNA [NR_102709]                                  |
| A_21_P0012591 | 0,04274333  | down | -1,5638993 | UGT2B11   | Homo sapiens UDP glucuronosyltransferase 2 family, polypeptide B11 (UGT2B11), mRNA [NM_001073]                                  |
| A_24_P251950  | 0,032581035 | down | -1,6749815 | UGT3A2    | Homo sapiens UDP glycosyltransferase 3 family, polypeptide A2 (UGT3A2), transcript variant 1, mRNA [NM_174914]                  |
| A_33_P3379454 | 0,023420928 | down | -1,5715766 | UHRF1     | Homo sapiens ubiquitin-like with PHD and ring finger domains 1 (UHRF1), transcript variant 3, mRNA [NM_001290050]               |
| A_33_P3355724 | 0,028034156 | down | -1,6178106 | UMODL1    | uromodulin-like 1 [Source:HGNC Symbol;Acc:HGNC:12560] [ENST00000475047]                                                         |
| A_33_P3355739 | 0,00532971  | down | -2,5786617 | UMODL1    | Homo sapiens uromodulin-like 1 (UMODL1), transcript variant 4, mRNA [NM_001199528]                                              |
| A_23_P131036  | 0,03945001  | down | -2,0490565 | UPK1A-AS1 | Homo sapiens UPK1A antisense RNA 1 (UPK1A-AS1), antisense RNA [NR_046420]                                                       |
| A_23_P422240  | 0,00716381  | down | -2,1393716 | UROC1     | Homo sapiens urocanate hydratase 1 (UROC1), transcript variant 1, mRNA [NM_144639]                                              |
| A_23_P116430  | 0,037442725 | down | -2,0437229 | USH1C     | Homo sapiens Usher syndrome 1C (autosomal recessive, severe) (USH1C), transcript variant 1, mRNA [NM_005709]                    |
| A_32_P189592  | 0,017352445 | down | -1,9643154 | USHBP1    | Homo sapiens Usher syndrome 1C binding protein 1 (USHBP1), transcript variant 1, mRNA [NM_031941]                               |
| A_24_P366859  | 0,017748082 | down | -2,0791984 | USHBP1    | Homo sapiens Usher syndrome 1C binding protein 1 (USHBP1), transcript variant 1, mRNA [NM_031941]                               |
| A_23_P400449  | 0,012869964 | down | -1,5607202 | VAT1L     | Homo sapiens vesicle amine transport 1-like (VAT1L), mRNA [NM_020927]                                                           |
| A_23_P303238  | 0,008245124 | down | -2,2485015 | VN1R5     | Homo sapiens vomeronasal 1 receptor 5 (gene/pseudogene) (VN1R5), mRNA [NM_173858]                                               |
| A_33_P3297030 | 0,040567037 | down | -1,6205988 | VPS53     | vacuolar protein sorting 53 homolog (S. cerevisiae) [Source:HGNC Symbol;Acc:HGNC:25608] [ENST00000570359]                       |
| A_33_P3514487 | 0,03688778  | down | -2,765136  | VSTM1     | Homo sapiens V-set and transmembrane domain containing 1 (VSTM1), transcript variant 1, mRNA [NM_198481]                        |
| A_23_P157027  | 0,025446316 | down | -1,5663916 | VSTM2A    | Homo sapiens V-set and transmembrane domain containing 2A (VSTM2A), transcript variant 1, mRNA [NM_182546]                      |
| A_23_P304509  | 0,031054812 | down | -1,7640876 | VSTM4     | Homo sapiens V-set and transmembrane domain containing 4 (VSTM4), transcript variant 2, mRNA [NM_144984]                        |
| A_33_P3381608 | 0,02186642  | down | -1,5735759 | VWA5B1    | Homo sapiens von Willebrand factor A domain containing 5B1 (VWA5B1), mRNA [NM_001039500]                                        |
| A_21_P0000868 | 0,005715421 | down | -1,7696235 | VWA8-AS1  | Homo sapiens VWA8 antisense RNA 1 (head to head) (VWA8-AS1), long non-coding RNA [NR_039974]                                    |
| A_33_P3304878 | 5,81E-04    | down | -2,8109832 | WDFY4     | Homo sapiens WDFY family member 4 (WDFY4), mRNA [NM_020945]                                                                     |
| A_33_P3843415 | 0,011776608 | down | -1,781742  | WDR11-AS1 | Homo sapiens WDR11 antisense RNA 1 (WDR11-AS1), long non-coding RNA [NR_033850]                                                 |
| A_21_P0010586 | 0,008913534 | down | -1,6191868 | WDR64     | Homo sapiens WD repeat domain 64 (WDR64), mRNA [NM_144625]                                                                      |
| A_33_P3415491 | 0,045268893 | down | -2,1741624 | WDR90     | Homo sapiens WD repeat domain 90 (WDR90), mRNA [NM_145294]                                                                      |
| A_33_P3285815 | 0,011177463 | down | -2,7388449 | WFDC6     | WAP four-disulfide core domain 6 [Source:HGNC Symbol;Acc:HGNC:16164] [ENST00000372665]                                          |
| A_24_P942600  | 0,03254825  | down | -1,8915997 | WNK2      | Homo sapiens WNK lysine deficient protein kinase 2 (WNK2), transcript variant 1, mRNA [NM_001282394]                            |
| A_33_P3377994 | 0,001511849 | down | -1,5869852 | WNK4      | Homo sapiens WNK lysine deficient protein kinase 4 (WNK4), mRNA [NM_032387]                                                     |
| A_23_P162322  | 1,84E-04    | down | -2,9866734 | WNT10B    | Homo sapiens wingless-type MMTV integration site family, member 10B (WNT10B), mRNA [NM_003394]                                  |
| A_33_P3397525 | 0,037170377 | down | -1,685212  | WNT4      | Homo sapiens wingless-type MMTV integration site family, member 4 (WNT4), mRNA [NM_030761]                                      |
| A_21_P0010968 | 0,019532476 | down | -1,905548  | WT1-AS    | Homo sapiens WT1 antisense RNA (WT1-AS), transcript variant 4, long non-coding RNA [NR_120548]                                  |

|                |             |      |            |           |                                                                                                                    |
|----------------|-------------|------|------------|-----------|--------------------------------------------------------------------------------------------------------------------|
| A_32_P345659   | 0,003531585 | down | -2,0300136 | XIRP1     | Homo sapiens xin actin-binding repeat containing 1 (XIRP1), transcript variant 1, mRNA [NM_194293]                 |
| A_23_P393163   | 0,034352224 | down | -1,6251616 | XIRP2     | Homo sapiens xin actin-binding repeat containing 2 (XIRP2), transcript variant 1, mRNA [NM_152381]                 |
| A_23_P34183    | 0,02866348  | down | -1,5105858 | XKRY2     | Homo sapiens XK, Kell blood group complex subunit-related, Y-linked 2 (XKRY2), mRNA [NM_001002906]                 |
| A_33_P3420392  | 0,035549026 | down | -1,5044413 | XPNPEP2   | X-prolyl aminopeptidase (aminopeptidase P) 2, membrane-bound [Source:HGNC Symbol;Acc:HGNC:12823] [ENST00000371105] |
| A_24_P21770    | 0,017571697 | down | -2,0008323 | YPEL4     | Homo sapiens yippee-like 4 (Drosophila) (YPEL4), mRNA [NM_145008]                                                  |
| A_33_P3283237  | 0,026418805 | down | -1,6907194 | YY2       | Homo sapiens YY2 transcription factor (YY2), mRNA [NM_206923]                                                      |
| A_33_P3289167  | 3,82E-04    | down | -2,0359247 | ZBTB32    | Homo sapiens zinc finger and BTB domain containing 32 (ZBTB32), mRNA [NM_014383]                                   |
| A_33_P3339961  | 0,009845624 | down | -1,6638288 | ZBTB8OS   | Homo sapiens zinc finger and BTB domain containing 8 opposite strand (ZBTB8OS), mRNA [NM_178547]                   |
| A_33_P3307820  | 0,040118076 | down | -2,7631676 | ZC2HC1B   | Homo sapiens zinc finger, C2HC-type containing 1B (ZC2HC1B), mRNA [NM_001013623]                                   |
| A_33_P3419399  | 0,03198294  | down | -1,7944478 | ZC3H12D   | Homo sapiens zinc finger CCCH-type containing 12D (ZC3H12D), mRNA [NM_207360]                                      |
| A_33_P3420500  | 0,047823306 | down | -2,085041  | ZDHHC20   | Homo sapiens zinc finger, DHHC-type containing 20, mRNA (cDNA clone IMAGE:4824131), complete cds. [BC034944]       |
| A_21_P0000590  | 0,035697006 | down | -1,5158571 | ZEB2      | Homo sapiens zinc finger E-box binding homeobox 2 (ZEB2), transcript variant 3, non-coding RNA [NR_033258]         |
| A_21_P0009057  | 0,015923569 | down | -1,6044217 | ZFHX3     | zinc finger homeobox 3 [Source:HGNC Symbol;Acc:HGNC:777] [ENST00000558842]                                         |
| A_33_P3341851  | 0,027893983 | down | -1,8647861 | ZGRF1     | zinc finger, GRF-type containing 1 [Source:HGNC Symbol;Acc:HGNC:25654] [ENST00000309071]                           |
| A_23_P327910   | 0,039211668 | down | -1,5859483 | ZIC3      | Homo sapiens Zic family member 3 (ZIC3), mRNA [NM_003413]                                                          |
| A_23_P78479    | 2,25E-04    | down | -3,4076486 | ZIM2      | Homo sapiens zinc finger, imprinted 2 (ZIM2), transcript variant 1, mRNA [NM_015363]                               |
| A_19_P00320274 | 0,035131957 | down | -1,9689277 | ZMIZ1-AS1 | Homo sapiens ZMIZ1 antisense RNA 1 (ZMIZ1-AS1), transcript variant 1, long non-coding RNA [NR_024431]              |
| A_21_P0002294  | 0,019555937 | down | -1,6401422 | ZNF112    | zinc finger protein 112 [Source:HGNC Symbol;Acc:HGNC:12892] [ENST00000590687]                                      |
| A_33_P3360912  | 0,024400972 | down | -1,7903016 | ZNF236    | zinc finger protein 236 [Source:HGNC Symbol;Acc:HGNC:13028] [ENST00000543926]                                      |
| A_33_P3399638  | 0,026274096 | down | -2,028254  | ZNF257    | Homo sapiens zinc finger protein 257 (ZNF257), mRNA [NM_033468]                                                    |
| A_33_P3629930  | 0,021978818 | down | -2,635195  | ZNF32-AS3 | Homo sapiens ZNF32 antisense RNA 3 (ZNF32-AS3), long non-coding RNA [NR_038867]                                    |
| A_23_P407096   | 0,037482087 | down | -1,633855  | ZNF366    | Homo sapiens zinc finger protein 366 (ZNF366), mRNA [NM_152625]                                                    |
| A_21_P0013971  | 0,013959267 | down | -1,9742739 | ZNF385D   | zinc finger protein 385D [Source:HGNC Symbol;Acc:HGNC:26191] [ENST00000497570]                                     |
| A_24_P917306   | 0,005543311 | down | -2,5536773 | ZNF385D   | zinc finger protein 385D [Source:HGNC Symbol;Acc:HGNC:26191] [ENST00000494108]                                     |
| A_24_P393565   | 0,008360088 | down | -1,9465516 | ZNF396    | zinc finger protein 396 [Source:HGNC Symbol;Acc:HGNC:18824] [ENST00000589332]                                      |
| A_21_P0006771  | 0,011780021 | down | -1,5669092 | ZNF503    | Homo sapiens zinc finger protein 503 (ZNF503), transcript variant 2, non-coding RNA [NR_120651]                    |
| A_21_P0014669  | 0,03184181  | up   | 1,7214284  | ZNF518A   | zinc finger protein 518A [Source:HGNC Symbol;Acc:HGNC:29009] [ENST00000563195]                                     |
| A_33_P3345126  | 0,04562894  | down | -1,8368274 | ZNF568    | Homo sapiens zinc finger protein 568 (ZNF568), transcript variant 1, mRNA [NM_198539]                              |
| A_33_P3245784  | 0,010288716 | down | -1,7738867 | ZNF620    | Homo sapiens zinc finger protein 620 (ZNF620), transcript variant 1, mRNA [NM_175888]                              |
| A_33_P3243248  | 2,33E-04    | down | -3,6258764 | ZNFX1     | zinc finger, NFX1-type containing 1 [Source:HGNC Symbol;Acc:HGNC:29271] [ENST00000469991]                          |
| A_23_P89132    | 0,02538322  | down | -1,9572493 | ZP2       | Homo sapiens zona pellucida glycoprotein 2 (sperm receptor) (ZP2), transcript variant 1, mRNA [NM_003460]          |
| A_23_P168726   | 0,010678448 | down | -2,6407816 | ZPBP      | Homo sapiens zona pellucida binding protein (ZPBP), transcript variant 1, mRNA [NM_007009]                         |
| A_33_P3406651  | 0,017996123 | down | -2,621658  | ZSCAN5B   | Homo sapiens zinc finger and SCAN domain containing 5B (ZSCAN5B), mRNA [NM_001080456]                              |
