# Supplementary material for: Early Reduction of SARS-CoV-2 Replication in Bronchial Epithelium by Kinin B2 Receptor Antagonism
Source: bioRxiv or medRxiv preprint supplement (doi:10.1101/2021.08.13.21262037), 2021-08-18
Supplement: Supplementary file [file media-7.pdf]

**Supplemental Table S5.** DEGs comparing SARS-CoV-2 + hydrocortisone (HC) versus SARS-CoV-2

| ProbeName     | p           | [[Cov2+HC] \ Regulatic FC | [[Cov2+H GeneSymbol   | Description                                                                                                                                                                     |
|---------------|-------------|---------------------------|-----------------------|---------------------------------------------------------------------------------------------------------------------------------------------------------------------------------|
| A_33_P3525263 | 0,029426465 | up                        | 3,530448 A2ML1        | Homo sapiens alpha-2-macroglobulin-like 1 (A2ML1), transcript variant 1, mRNA [NM_144670]                                                                                       |
| A_21_P0000904 | 0,010344355 | up                        | 2,4416256 A2MP1       | Homo sapiens alpha-2-macroglobulin pseudogene 1 (A2MP1), non-coding RNA [NR_040112]                                                                                             |
| A_33_P3307960 | 0,001662964 | down                      | -2,1020954 AADACL3    | Homo sapiens arylacetamide deacetylase-like 3 (AADACL3), transcript variant 1, mRNA [NM_001103170]                                                                              |
| A_33_P3289204 | 0,005918358 | down                      | -1,5758368 AAK1       | Homo sapiens AP2 associated kinase 1 (AAK1), mRNA [NM_014911]                                                                                                                   |
| A_32_P181527  | 3,85E-04    | down                      | -2,363122 AARD        | Homo sapiens alanine and arginine rich domain containing protein (AARD), mRNA [NM_001025357]                                                                                    |
| A_33_P3343981 | 6,39E-05    | down                      | -2,5489085 AATK       | apoptosis-associated tyrosine kinase [Source:HGNC Symbol;Acc:HGNC:21] [ENST00000572798]                                                                                         |
| A_33_P3504522 | 0,031712905 | up                        | 1,8714286 AATK-AS1    | Homo sapiens AATK antisense RNA 1 (AATK-AS1), long non-coding RNA [NR_027255]                                                                                                   |
| A_33_P3366161 | 0,00659302  | down                      | -2,394082 ABAT        | Homo sapiens 4-aminobutyrate aminotransferase (ABAT), transcript variant 2, mRNA [NM_000663]                                                                                    |
| A_33_P3239052 | 0,004630672 | up                        | 1,9099368 ABCA17P     | Homo sapiens ATP-binding cassette, sub-family A (ABC1), member 17, pseudogene (ABCA17P), non-coding RNA [NR_003574]                                                             |
| A_33_P3417081 | 0,002699567 | up                        | 1,7335106 ABCA17P     | Homo sapiens ATP-binding cassette, sub-family A (ABC1), member 17, pseudogene (ABCA17P), non-coding RNA [NR_003574]                                                             |
| A_33_P3251672 | 1,92E-04    | down                      | -2,1948128 ABCA2      | Homo sapiens ATP-binding cassette, sub-family A (ABC1), member 2 (ABCA2), transcript variant 1, mRNA [NM_001606]                                                                |
| A_33_P3342305 | 0,002783157 | up                        | 1,5834169 ABCA8       | Homo sapiens ATP-binding cassette, sub-family A (ABC1), member 8 (ABCA8), transcript variant 2, mRNA [NM_007168]                                                                |
| A_33_P3332414 | 0,024288127 | up                        | 2,5256684 ABCB1       | Homo sapiens ATP-binding cassette, sub-family B (MDR/TAP), member 1 (ABCB1), mRNA [NM_000927]                                                                                   |
| A_33_P3337554 | 0,005962792 | up                        | 2,5511692 ABCB5       | Homo sapiens ATP-binding cassette, sub-family B (MDR/TAP), member 5 (ABCB5), transcript variant 4, mRNA [NM_001163993]                                                          |
| A_23_P111662  | 0,0417194   | up                        | 2,0366604 ABCB5       | Homo sapiens ATP-binding cassette, sub-family B (MDR/TAP), member 5 (ABCB5), transcript variant 2, mRNA [NM_178559]                                                             |
| A_33_P3372563 | 0,007973543 | down                      | -1,7968081 ABCC10     | Homo sapiens ATP-binding cassette, sub-family C (CFTR/MRP), member 10 (ABCC10), transcript variant MRP7A, mRNA [NM_033450]                                                      |
| A_33_P3389518 | 0,02783587  | up                        | 2,5090327 ABCC2       | ATP-binding cassette, sub-family C (CFTR/MRP), member 2 [Source:HGNC Symbol;Acc:HGNC:53] [ENST00000370434]                                                                      |
| A_23_P207507  | 2,26E-04    | up                        | 3,4624865 ABCC3       | Homo sapiens ATP-binding cassette, sub-family C (CFTR/MRP), member 3 (ABCC3), transcript variant 1, mRNA [NM_003786]                                                            |
| A_33_P3298024 | 4,10E-04    | up                        | 1,7537702 ABCC3       | Homo sapiens ATP-binding cassette, sub-family C (CFTR/MRP), member 3 (ABCC3), transcript variant 2, mRNA [NM_001144070]                                                         |
| A_23_P15272   | 0,045632645 | down                      | -1,5595915 ABCC6      | Homo sapiens ATP-binding cassette, sub-family C (CFTR/MRP), member 6 (ABCC6), transcript variant 2, mRNA [NM_001079528]                                                         |
| A_23_P100539  | 0,005381806 | down                      | -1,7245983 ABCC6      | Homo sapiens ATP-binding cassette, sub-family C (CFTR/MRP), member 6 (ABCC6), transcript variant 1, mRNA [NM_001171]                                                            |
| A_23_P24774   | 0,036295537 | down                      | -2,1536572 ABCC8      | Homo sapiens ATP-binding cassette, sub-family C (CFTR/MRP), member 8 (ABCC8), transcript variant 2, mRNA [NM_000352]                                                            |
| A_23_P368691  | 0,004399675 | up                        | 1,5568287 ABCC9       | Homo sapiens ATP-binding cassette, sub-family C (CFTR/MRP), member 9 (ABCC9), transcript variant SUR2A, mRNA [NM_005691]                                                        |
| A_32_P108474  | 0,00827288  | up                        | 1,5606675 ABCE1       | Homo sapiens ATP-binding cassette, sub-family E (OABP), member 1 (ABCE1), transcript variant 1, mRNA [NM_002940]                                                                |
| A_23_P119763  | 0,014607829 | down                      | -1,8482424 ABCG5      | Homo sapiens ATP-binding cassette, sub-family G (WHITE), member 5 (ABCG5), mRNA [NM_022436]                                                                                     |
| A_33_P3333480 | 0,001818699 | down                      | -1,9954699 ABHD11-AS1 | Homo sapiens ABHD11 antisense RNA 1 (tail to tail) (ABHD11-AS1), long non-coding RNA [NR_026690]                                                                                |
| A_33_P3289461 | 6,40E-05    | down                      | -2,6793847 ABHD16B    | Homo sapiens abhydrolase domain containing 16B (ABHD16B), mRNA [NM_080622]                                                                                                      |
| A_23_P369701  | 0,010576213 | up                        | 2,0081685 ABHD17C     | Homo sapiens abhydrolase domain containing 17C (ABHD17C), mRNA [NM_021214]                                                                                                      |
| A_23_P395172  | 0,049621515 | up                        | 1,5313747 ABHD2       | Homo sapiens abhydrolase domain containing 2 (ABHD2), transcript variant 1, mRNA [NM_007011]                                                                                    |
| A_23_P211850  | 0,004822654 | down                      | -1,5097221 ABHD6      | Homo sapiens abhydrolase domain containing 6 (ABHD6), mRNA [NM_020676]                                                                                                          |
| A_24_P933418  | 0,016648674 | up                        | 1,5108805 ABI2        | Homo sapiens abl-interactor 2 (ABI2), transcript variant 3, mRNA [NM_005759]                                                                                                    |
| A_23_P141429  | 2,31E-04    | down                      | -1,7596201 ABI3       | Homo sapiens ABI family, member 3 (ABI3), transcript variant 1, mRNA [NM_016428]                                                                                                |
| A_33_P3411975 | 0,022768965 | down                      | -2,5573123 ABI3BP     | Homo sapiens ABI family, member 3 (NESH) binding protein (ABI3BP), mRNA [NM_015429]                                                                                             |
| A_33_P3388651 | 0,044935524 | down                      | -1,9597416 ABLIM1     | Homo sapiens actin binding LIM protein 1 (ABLIM1), transcript variant 3, mRNA [NM_001003408]                                                                                    |
| A_21_P0006397 | 0,023092113 | down                      | -1,5499774 ABO        | ABO blood group (transferase A, alpha 1-3-N-acetylgalactosaminyltransferase; transferase B, alpha 1-3-galactosyltransferase) [Source:HGNC Symbol;Acc:HGNC:79] [ENST00000453660] |
| A_23_P356616  | 1,41E-04    | up                        | 2,1220593 ABTB2       | Homo sapiens ankyrin repeat and BTB (POZ) domain containing 2 (ABTB2), mRNA [NM_145804]                                                                                         |
| A_23_P87791   | 0,013618453 | down                      | -1,8317808 ACACB      | Homo sapiens acetyl-CoA carboxylase beta (ACACB), mRNA [NM_001093]                                                                                                              |
| A_24_P227450  | 4,12E-04    | down                      | -1,6584389 ACAD10     | Homo sapiens acyl-CoA dehydrogenase family, member 10 (ACAD10), transcript variant 2, mRNA [NM_025247]                                                                          |
| A_23_P47426   | 0,019761082 | up                        | 1,6119752 ACAD8       | Homo sapiens acyl-CoA dehydrogenase family, member 8 (ACAD8), mRNA [NM_014384]                                                                                                  |
| A_23_P307310  | 0,005543658 | down                      | -1,845507 ACAN        | Homo sapiens aggrecan (ACAN), transcript variant 2, mRNA [NM_013227]                                                                                                            |
| A_33_P3500167 | 0,02227594  | down                      | -2,0672276 ACAN       | Homo sapiens aggrecan (ACAN), transcript variant 1, mRNA [NM_001135]                                                                                                            |
| A_24_P366122  | 9,64E-04    | down                      | -2,126014 ACBD4       | Homo sapiens acyl-CoA binding domain containing 4 (ACBD4), transcript variant 2, mRNA [NM_024722]                                                                               |
| A_23_P72584   | 0,018283261 | down                      | -1,7503034 ACBD7      | Homo sapiens acyl-CoA binding domain containing 7 (ACBD7), mRNA [NM_001039844]                                                                                                  |
| A_33_P3229288 | 0,023987522 | down                      | -1,5539296 ACE        | Homo sapiens angiotensin I converting enzyme (ACE), transcript variant 1, mRNA [NM_000789]                                                                                      |
| A_23_P38952   | 0,00350111  | down                      | -2,871732 ACER1       | Homo sapiens alkaline ceramidase 1 (ACER1), mRNA [NM_133492]                                                                                                                    |
| A_33_P3788618 | 0,04782368  | down                      | -1,7643745 ACER2      | Homo sapiens alkaline ceramidase 2 (ACER2), mRNA [NM_001010887]                                                                                                                 |
| A_33_P3413759 | 0,003940203 | down                      | -1,8196955 ACER2      | Homo sapiens alkaline ceramidase 2 (ACER2), mRNA [NM_001010887]                                                                                                                 |
| A_23_P115161  | 0,020368934 | down                      | -1,6849034 ACKR1      | Homo sapiens atypical chemokine receptor 1 (Duffy blood group) (ACKR1), transcript variant 2, mRNA [NM_002036]                                                                  |
| A_23_P9415    | 0,043564785 | up                        | 1,6299031 ACO1        | Homo sapiens aconitase 1, soluble (ACO1), transcript variant 2, mRNA [NM_002197]                                                                                                |
| A_23_P325726  | 0,009921301 | down                      | -1,9248482 ACOT11     | Homo sapiens acyl-CoA thioesterase 11 (ACOT11), transcript variant 1, mRNA [NM_015547]                                                                                          |
| A_23_P44207   | 4,67E-04    | down                      | -2,633721 ACOT12      | Homo sapiens acyl-CoA thioesterase 12 (ACOT12), mRNA [NM_130767]                                                                                                                |
| A_33_P3382849 | 0,001268477 | down                      | -2,1774144 ACR        | Homo sapiens acrosin (ACR), mRNA [NM_001097]                                                                                                                                    |
| A_21_P0014045 | 0,019600458 | up                        | 1,7970951 ACR         | Homo sapiens acrosin (ACR), mRNA [NM_001097]                                                                                                                                    |
| A_24_P941736  | 0,001584907 | up                        | 1,7576125 ACSBG1      | acyl-CoA synthetase bubblegum family member 1 [Source:HGNC Symbol;Acc:HGNC:29567] [ENST00000258873]                                                                             |
| A_24_P248606  | 0,002776695 | up                        | 1,5534928 ACSL3       | Homo sapiens acyl-CoA synthetase long-chain family member 3 (ACSL3), transcript variant 1, mRNA [NM_004457]                                                                     |
| A_33_P3217983 | 4,68E-04    | down                      | -3,8882313 ACSL5      | Homo sapiens acyl-CoA synthetase long-chain family member 5 (ACSL5), transcript variant 3, mRNA [NM_203380]                                                                     |
| A_33_P3395083 | 0,030824587 | up                        | 1,6948549 ACSM4       | Homo sapiens acyl-CoA synthetase medium-chain family member 4 (ACSM4), mRNA [NM_001080454]                                                                                      |

|               |             |      |            |             |                                                                                                                             |
|---------------|-------------|------|------------|-------------|-----------------------------------------------------------------------------------------------------------------------------|
| A_33_P3339276 | 6,28E-05    | down | -3,4135482 | ACSM5       | Homo sapiens acyl-CoA synthetase medium-chain family member 5 (ACSM5), mRNA [NM_017888]                                     |
| A_33_P3395081 | 0,010583664 | up   | 2,189848   | ACSM5       | Homo sapiens acyl-CoA synthetase medium-chain family member 5 (ACSM5), mRNA [NM_017888]                                     |
| A_33_P3400253 | 0,011227565 | up   | 1,5034304  | ACSM6       | acyl-CoA synthetase medium-chain family member 6 [Source:HGNC Symbol;Acc:HGNC:31665] [ENST00000327739]                      |
| A_33_P3255165 | 0,001244836 | down | -2,0750618 | ACTA2-AS1   | Homo sapiens ACTA2 antisense RNA 1 (ACTA2-AS1), long non-coding RNA [NR_125373]                                             |
| A_24_P6903    | 0,008853097 | down | -2,0334089 | ACTBL2      | Homo sapiens actin, beta-like 2 (ACTBL2), mRNA [NM_001017992]                                                               |
| A_23_P145681  | 1,97E-04    | down | -2,4584684 | ACTL6B      | Homo sapiens actin-like 6B (ACTL6B), mRNA [NM_016188]                                                                       |
| A_23_P138881  | 0,031939603 | down | -1,5926933 | ACTN3       | Homo sapiens actinin, alpha 3 (gene/pseudogene) (ACTN3), transcript variant 1, coding, mRNA [NM_001104]                     |
| A_33_P3864411 | 1,10E-04    | down | -3,3315203 | ACTR3BP5    | Homo sapiens ACTR3B pseudogene 5 (ACTR3BP5), non-coding RNA [NR_045000]                                                     |
| A_23_P148829  | 3,73E-05    | down | -2,8337343 | ACTRT2      | Homo sapiens actin-related protein T2 (ACTRT2), mRNA [NM_080431]                                                            |
| A_33_P3360665 | 0,004474744 | up   | 1,5591735  | ACVR1       | Homo sapiens activin A receptor, type I (ACVR1), transcript variant 1, mRNA [NM_001105]                                     |
| A_23_P153930  | 0,017644241 | up   | 1,5079288  | ACVR2A      | Homo sapiens activin A receptor, type IIA (ACVR2A), transcript variant 2, mRNA [NM_001616]                                  |
| A_33_P3244478 | 0,004662937 | down | -2,028014  | ACVR2B-AS1  | Homo sapiens ACVR2B antisense RNA 1 (ACVR2B-AS1), long non-coding RNA [NR_028389]                                           |
| A_33_P3272402 | 0,02633608  | down | -1,8789531 | ADAD2       | Homo sapiens adenosine deaminase domain containing 2 (ADAD2), transcript variant 1, mRNA [NM_139174]                        |
| A_21_P0000708 | 4,31E-05    | up   | 2,3538947  | ADAM20P1    | Homo sapiens ADAM metalloproteinase domain 20 pseudogene 1 (ADAM20P1), non-coding RNA [NR_037933]                           |
| A_33_P3216458 | 0,008956674 | down | -2,0490108 | ADAM23      | Homo sapiens ADAM metalloproteinase domain 23 (ADAM23), mRNA [NM_003812]                                                    |
| A_23_P126363  | 0,00159325  | up   | 3,4996753  | ADAM30      | Homo sapiens ADAM metalloproteinase domain 30 (ADAM30), mRNA [NM_021794]                                                    |
| A_23_P44665   | 0,01791134  | up   | 1,5582592  | ADAM32      | Homo sapiens ADAM metalloproteinase domain 32 (ADAM32), mRNA [NM_145004]                                                    |
| A_33_P3342653 | 3,49E-04    | down | -2,3681595 | ADAM33      | Homo sapiens ADAM metalloproteinase domain 33 (ADAM33), transcript variant 2, mRNA [NM_153202]                              |
| A_21_P0013537 | 0,045523345 | up   | 2,835412   | ADAM5       | ADAM metalloproteinase domain 5, pseudogene [Source:HGNC Symbol;Acc:HGNC:212] [ENST00000497773]                             |
| A_24_P230026  | 0,004090494 | up   | 1,7438173  | ADAM5       | Homo sapiens ADAM metalloproteinase domain 5 (pseudogene) (ADAM5), non-coding RNA [NR_001448]                               |
| A_23_P94296   | 0,005643754 | down | -2,2715983 | ADAM7       | Homo sapiens ADAM metalloproteinase domain 7 (ADAM7), mRNA [NM_003817]                                                      |
| A_33_P3390172 | 0,014125242 | up   | 1,5661411  | ADAMDEC1    | Homo sapiens ADAM-like, decysin 1 (ADAMDEC1), transcript variant 2, mRNA [NM_001145271]                                     |
| A_33_P3342780 | 0,005330453 | down | -2,3838043 | ADAMTS13    | Homo sapiens ADAM metalloproteinase with thrombospondin type 1 motif, 13 (ADAMTS13), transcript variant 3, mRNA [NM_139026] |
| A_23_P321307  | 0,001061425 | down | -2,2114859 | ADAMTS2     | Homo sapiens ADAM metalloproteinase with thrombospondin type 1 motif, 2 (ADAMTS2), transcript variant 2, mRNA [NM_021599]   |
| A_23_P420359  | 0,002968004 | up   | 1,5588328  | ADAMTS20    | Homo sapiens ADAM metalloproteinase with thrombospondin type 1 motif, 20 (ADAMTS20), mRNA [NM_0250003]                      |
| A_33_P3210762 | 0,044484977 | down | -2,289858  | ADAMTS7     | Homo sapiens ADAM metalloproteinase with thrombospondin type 1 motif, 7 (ADAMTS7), mRNA [NM_014272]                         |
| A_33_P3215557 | 0,001233639 | down | -3,2593195 | ADAMTS7     | Homo sapiens ADAM metalloproteinase with thrombospondin type 1 motif, 7 (ADAMTS7), mRNA [NM_014272]                         |
| A_23_P11005   | 8,97E-04    | down | -2,1541433 | ADAMTS7     | Homo sapiens ADAM metalloproteinase with thrombospondin type 1 motif, 7 (ADAMTS7), mRNA [NM_014272]                         |
| A_33_P3286722 | 0,029972412 | up   | 1,6552258  | ADAMTS7P1   | Homo sapiens FLJ00317 protein (LOC390660), non-coding RNA [NR_045529]                                                       |
| A_32_P196263  | 0,03066857  | up   | 3,4846997  | ADAMTS9     | Homo sapiens ADAM metalloproteinase with thrombospondin type 1 motif, 9 (ADAMTS9), mRNA [NM_182920]                         |
| A_21_P0000741 | 0,00957908  | down | -2,1032197 | ADAMTS9-AS2 | Homo sapiens ADAMTS9 antisense RNA 2 (ADAMTS9-AS2), long non-coding RNA [NR_038264]                                         |
| A_23_P342138  | 0,026067015 | down | -1,7030599 | ADAMTSL1    | Homo sapiens ADAMTS-like 1 (ADAMTSL1), transcript variant 4, mRNA [NM_001040272]                                            |
| A_33_P3312509 | 0,004562189 | down | -1,8096466 | ADAMTSL2    | Homo sapiens ADAMTS-like 2 (ADAMTSL2), transcript variant 1, mRNA [NM_014694]                                               |
| A_23_P20697   | 9,63E-04    | down | -1,6589369 | ADAMTSL2    | Homo sapiens ADAMTS-like 2 (ADAMTSL2), transcript variant 1, mRNA [NM_014694]                                               |
| A_23_P115011  | 0,04471734  | up   | 1,6426224  | ADAMTSL4    | Homo sapiens ADAMTS-like 4 (ADAMTSL4), transcript variant 1, mRNA [NM_019032]                                               |
| A_33_P3245489 | 0,010311194 | down | -2,0192525 | ADAMTSL5    | Homo sapiens ADAMTS-like 5 (ADAMTSL5), mRNA [NM_213604]                                                                     |
| A_33_P3399061 | 0,001725975 | down | -1,5418559 | ADARB1      | Homo sapiens adenosine deaminase, RNA-specific, B1 (ADARB1), transcript variant 4, non-coding RNA [NR_027673]               |
| A_32_P29954   | 0,043392982 | down | -1,8932555 | ADARB2-AS1  | Homo sapiens ADARB2 antisense RNA 1 (ADARB2-AS1), long non-coding RNA [NR_033387]                                           |
| A_23_P67864   | 0,013476179 | up   | 1,5341223  | ADCY3       | Homo sapiens adenylate cyclase 3 (ADCY3), mRNA [NM_004036]                                                                  |
| A_23_P501547  | 0,003848887 | up   | 1,7392433  | ADCY6       | Homo sapiens adenylate cyclase 6 (ADCY6), transcript variant 1, mRNA [NM_015270]                                            |
| A_33_P3241782 | 0,009068268 | up   | 2,8748028  | ADD2        | Homo sapiens adducin 2 (beta) (ADD2), transcript variant 1, mRNA [NM_001617]                                                |
| A_23_P421436  | 0,030845629 | up   | 1,5464028  | ADD2        | Homo sapiens adducin 2 (beta) (ADD2), transcript variant 4, mRNA [NM_017488]                                                |
| A_23_P70643   | 0,002273397 | up   | 1,8131804  | ADGB        | Homo sapiens androglobin (ADGB), mRNA [NM_024694]                                                                           |
| A_23_P81158   | 2,92E-07    | down | -7,077289  | ADH1C       | Homo sapiens alcohol dehydrogenase 1C (class I), gamma polypeptide (ADH1C), mRNA [NM_000669]                                |
| A_33_P3300747 | 0,03590694  | down | -1,8467563 | ADHFE1      | Homo sapiens alcohol dehydrogenase, iron containing, 1 (ADHFE1), mRNA [NM_144650]                                           |
| A_23_P369237  | 0,008858528 | down | -1,7243252 | ADIPOQ      | Homo sapiens adiponectin, C1Q and collagen domain containing (ADIPOQ), transcript variant 2, mRNA [NM_004797]               |
| A_33_P3248765 | 0,04501125  | down | -1,5417329 | ADIPOR1     | Homo sapiens adiponectin receptor 1 (ADIPOR1), transcript variant 3, mRNA [NM_001290557]                                    |
| A_23_P127948  | 0,01370018  | up   | 1,6644799  | ADM         | Homo sapiens adrenomedullin (ADM), mRNA [NM_001124]                                                                         |
| A_33_P3413910 | 0,012669004 | down | -1,5888822 | ADM2        | Homo sapiens adrenomedullin 2 (ADM2), transcript variant 1, mRNA [NM_024866]                                                |
| A_23_P254179  | 1,19E-04    | up   | 1,7140367  | ADNP        | Homo sapiens activity-dependent neuroprotector homeobox (ADNP), transcript variant 1, mRNA [NM_015339]                      |
| A_24_P237270  | 0,013966318 | up   | 2,6195738  | ADORA2A     | Homo sapiens adenosine A2a receptor (ADORA2A), transcript variant 3, mRNA [NM_000675]                                       |
| A_21_P0000570 | 0,0036484   | down | -2,696237  | ADORA2A-AS1 | Homo sapiens ADORA2A antisense RNA 1 (ADORA2A-AS1), transcript variant 2, long non-coding RNA [NR_028483]                   |
| A_23_P14716   | 3,24E-04    | up   | 1,907414   | ADPGK       | Homo sapiens ADP-dependent glucokinase (ADPGK), transcript variant 1, mRNA [NM_031284]                                      |
| A_23_P138706  | 0,012365628 | up   | 2,0762808  | ADRA2A      | Homo sapiens adrenoceptor alpha 2A (ADRA2A), mRNA [NM_000681]                                                               |
| A_23_P145024  | 0,002872571 | up   | 1,7600032  | ADRB2       | Homo sapiens adrenoceptor beta 2, surface (ADRB2), mRNA [NM_000024]                                                         |
| A_23_P201432  | 4,62E-04    | up   | 1,6679738  | ADSS        | Homo sapiens adenylosuccinate synthase (ADSS), mRNA [NM_001126]                                                             |
| A_23_P206077  | 0,015299762 | up   | 1,7301587  | AEN         | Homo sapiens apoptosis enhancing nuclease (AEN), mRNA [NM_022767]                                                           |
| A_24_P414332  | 1,98E-04    | up   | 2,9045258  | AFF1        | Homo sapiens AF4/FMR2 family, member 1 (AFF1), transcript variant 2, mRNA [NM_005935]                                       |
| A_33_P3293888 | 0,004467628 | down | -2,0620875 | AFF2        | Homo sapiens AF4/FMR2 family, member 2 (AFF2), transcript variant 1, mRNA [NM_002025]                                       |
| A_33_P3373348 | 0,015525769 | down | -2,2335885 | AFF3        | AF4/FMR2 family, member 3 [Source:HGNC Symbol;Acc:HGNC:6473] [ENST00000483600]                                              |
| A_21_P0014083 | 0,029103717 | down | -2,4790573 | AGAP1-IT1   | PREDICTED: Homo sapiens AGAP1 intronic transcript 1 (non-protein coding) (AGAP1-IT1), ncRNA [XR_108380]                     |

|               |             |      |            |            |                                                                                                                                                    |
|---------------|-------------|------|------------|------------|----------------------------------------------------------------------------------------------------------------------------------------------------|
| A_33_P3375435 | 0,003405481 | down | -1,5671016 | AGAP11     | Homo sapiens ankyrin repeat and GTPase domain Arf GTPase activating protein 11 (AGAP11), mRNA [NM_133447]                                          |
| A_32_P41526   | 0,006955841 | up   | 1,6513537  | AGAP5      | Homo sapiens ArfGAP with GTPase domain, ankyrin repeat and PH domain 5 (AGAP5), mRNA [NM_001144000]                                                |
| A_33_P3355418 | 0,03584851  | down | -1,5230759 | AGBL1      | Homo sapiens ATP/GTP binding protein-like 1 (AGBL1), mRNA [NM_152336]                                                                              |
| A_32_P82623   | 0,006135705 | down | -1,6526597 | AGBL3      | Homo sapiens ATP/GTP binding protein-like 3 (AGBL3), mRNA [NM_178563]                                                                              |
| A_33_P3378101 | 0,008360048 | down | -1,606262  | AGBL4      | Homo sapiens ATP/GTP binding protein-like 4 (AGBL4), mRNA [NM_032785]                                                                              |
| A_33_P3386572 | 0,008979002 | down | -2,5810676 | AGBL4      | ATP/GTP binding protein-like 4 [Source:HGNC Symbol;Acc:HGNC:25892] [ENST00000497451]                                                               |
| A_33_P3238993 | 0,001415354 | up   | 1,7832907  | AGFG1      | Homo sapiens ArfGAP with FG repeats 1 (AGFG1), transcript variant 1, mRNA [NM_001135187]                                                           |
| A_23_P200298  | 0,011998847 | up   | 1,5337645  | AGL        | Homo sapiens amylo-alpha-1, 6-glucosidase, 4-alpha-glucanotransferase (AGL), transcript variant 4, mRNA [NM_000028]                                |
| A_33_P3402116 | 0,002777017 | down | -2,3888633 | AGO1       | Homo sapiens argonaute RISC catalytic component 1 (AGO1), mRNA [NM_012199]                                                                         |
| A_23_P31407   | 0,003832783 | down | -2,7187066 | AGR2       | Homo sapiens anterior gradient 2 (AGR2), mRNA [NM_006408]                                                                                          |
| A_33_P3215797 | 0,037382234 | down | -1,7725457 | AHDC1      | Homo sapiens AT hook, DNA binding motif, containing 1 (AHDC1), mRNA [NM_001029882]                                                                 |
| A_24_P943393  | 0,001716839 | up   | 1,5964024  | AHNAK      | Homo sapiens AHNAK nucleoprotein (AHNAK), transcript variant 1, mRNA [NM_001620]                                                                   |
| A_33_P3222380 | 0,007465863 | down | -1,8567657 | AHNAK2     | Homo sapiens AHNAK nucleoprotein 2 (AHNAK2), mRNA [NM_138420]                                                                                      |
| A_33_P3368560 | 8,44E-06    | down | -4,076132  | AHSA2      | AHA1, activator of heat shock 90kDa protein ATPase homolog 2 (yeast) [Source:HGNC Symbol;Acc:HGNC:20437] [ENST00000394457]                         |
| A_23_P155514  | 0,01874555  | down | -2,168846  | AHSG       | Homo sapiens alpha-2-HS-glycoprotein (AHSG), mRNA [NM_001622]                                                                                      |
| A_33_P3250857 | 2,24E-04    | down | -2,1244879 | AIDA       | axin interactor, dorsalization associated [Source:HGNC Symbol;Acc:HGNC:25761] [ENST00000474863]                                                    |
| A_23_P214627  | 0,022656925 | up   | 2,3285694  | AIF1       | Homo sapiens allograft inflammatory factor 1 (AIF1), transcript variant 2, mRNA [NM_004847]                                                        |
| A_24_P308229  | 0,011156531 | up   | 1,6835155  | AIM1L      | Homo sapiens absent in melanoma 1-like (AIM1L), mRNA [NM_001039775]                                                                                |
| A_23_P68740   | 0,006984205 | down | -2,614945  | AIRE       | Homo sapiens autoimmune regulator (AIRE), mRNA [NM_000383]                                                                                         |
| A_33_P3307253 | 2,50E-04    | down | -2,5982091 | AK5        | Homo sapiens adenylate kinase 5 (AK5), transcript variant 2, mRNA [NM_012093]                                                                      |
| A_23_P83200   | 7,96E-04    | down | -2,3167734 | AK8        | Homo sapiens adenylate kinase 8 (AK8), mRNA [NM_152572]                                                                                            |
| A_23_P348749  | 0,03900661  | up   | 1,5676278  | AK9        | Homo sapiens adenylate kinase 9 (AK9), transcript variant 2, mRNA [NM_145025]                                                                      |
| A_24_P142095  | 5,81E-06    | up   | 2,2052712  | AKAP13     | Homo sapiens A kinase (PRKA) anchor protein 13 (AKAP13), transcript variant 1, mRNA [NM_006738]                                                    |
| A_33_P3417920 | 0,001822032 | down | -2,6352181 | AKAP4      | Homo sapiens A kinase (PRKA) anchor protein 4 (AKAP4), transcript variant 1, mRNA [NM_003886]                                                      |
| A_33_P3220047 | 0,024796136 | down | -1,7948828 | AKNA       | Homo sapiens AT-hook transcription factor (AKNA), mRNA [NM_030767]                                                                                 |
| A_33_P3297853 | 0,012681669 | up   | 2,072086   | AKNA       | Homo sapiens AT-hook transcription factor (AKNA), mRNA [NM_030767]                                                                                 |
| A_33_P3365117 | 0,02401498  | down | -2,3901718 | AKR1C1     | aldo-keto reductase family 1, member C1 [Source:HGNC Symbol;Acc:HGNC:384] [ENST00000380859]                                                        |
| A_33_P3329028 | 0,048200592 | down | -1,573146  | AKR1C8P    | Homo sapiens aldo-keto reductase family 1, member C8, pseudogene (AKR1C8P), non-coding RNA [NR_027916]                                             |
| A_23_P382000  | 0,007212819 | up   | 1,5880212  | AKR1D1     | Homo sapiens aldo-keto reductase family 1, member D1 (AKR1D1), transcript variant 1, mRNA [NM_005989]                                              |
| A_33_P3218004 | 0,006336816 | up   | 1,8036532  | AKR7L      | Homo sapiens aldo-keto reductase family 7-like (gene/pseudogene) (AKR7L), transcript variant 1, non-coding RNA [NR_040288]                         |
| A_21_P0008700 | 0,002198689 | down | -3,0510697 | ALDH1A3    | PREDICTED: Homo sapiens uncharacterized LOC145757 (RP11-66B24.1), transcript variant X1, misc. RNA [XR_109231]                                     |
| A_23_P205959  | 0,016692081 | up   | 2,1798975  | ALDH1A3    | Homo sapiens aldehyde dehydrogenase 1 family, member A3 (ALDH1A3), transcript variant 1, mRNA [NM_000693]                                          |
| A_33_P3282634 | 0,005763746 | down | -2,8167398 | ALDH1L2    | Homo sapiens aldehyde dehydrogenase 1 family, member L2 (ALDH1L2), transcript variant 1, mRNA [NM_001034173]                                       |
| A_23_P32143   | 1,40E-04    | down | -2,5945826 | ALDOB      | Homo sapiens aldolase B, fructose-bisphosphate (ALDOB), mRNA [NM_000035]                                                                           |
| A_24_P795594  | 8,92E-04    | up   | 1,8017913  | ALG9       | Homo sapiens ALG9, alpha-1,2-mannosyltransferase (ALG9), transcript variant 3, mRNA [NM_001077691]                                                 |
| A_21_P0000832 | 0,046364613 | up   | 2,166625   | ALKBH3-AS1 | Homo sapiens ALKBH3 antisense RNA 1 (ALKBH3-AS1), long non-coding RNA [NR_038907]                                                                  |
| A_23_P371876  | 0,001106634 | down | -1,6448562 | ALKBH8     | Homo sapiens alkB, alkylation repair homolog 8 (E. coli) (ALKBH8), transcript variant 2, mRNA [NM_138775]                                          |
| A_33_P3328445 | 0,003449616 | up   | 1,5680072  | ALOX12-AS1 | Homo sapiens cDNA FLJ90099 fis, clone HEMBA1006016. [AK074580]                                                                                     |
| A_21_P0011615 | 0,019961353 | down | -1,5215989 | ALOX12P2   | Homo sapiens arachidonate 12-lipoxygenase pseudogene 2 (ALOX12P2), transcript variant 1, non-coding RNA [NR_002710]                                |
| A_32_P440768  | 0,016271768 | down | -2,0284593 | ALOX12P2   | Homo sapiens arachidonate 12-lipoxygenase pseudogene 2 (ALOX12P2), transcript variant 1, non-coding RNA [NR_002710]                                |
| A_21_P0011510 | 0,018983087 | down | -1,910281  | ALOX12P2   | Homo sapiens arachidonate 12-lipoxygenase pseudogene 2 (ALOX12P2), transcript variant 1, non-coding RNA [NR_002710]                                |
| A_23_P60627   | 7,64E-05    | up   | 2,623692   | ALOX15B    | Homo sapiens arachidonate 15-lipoxygenase, type B (ALOX15B), transcript variant d, mRNA [NM_001141]                                                |
| A_24_P347378  | 0,001915561 | down | -2,8134346 | ALOX5AP    | Homo sapiens arachidonate 5-lipoxygenase-activating protein (ALOX5AP), transcript variant 1, mRNA [NM_001629]                                      |
| A_23_P144531  | 0,01764902  | down | -1,5003316 | ALPK1      | Homo sapiens cDNA: FLJ22670 fis, clone HSI08684. [AK026323]                                                                                        |
| A_33_P3210099 | 7,71E-05    | up   | 2,0061088  | ALPK3      | Homo sapiens alpha-kinase 3 (ALPK3), mRNA [NM_020778]                                                                                              |
| A_23_P79587   | 7,87E-04    | down | -1,917896  | ALPP       | alkaline phosphatase, placental [Source:HGNC Symbol;Acc:HGNC:439] [ENST00000485563]                                                                |
| A_24_P131580  | 0,001577825 | down | -2,1451337 | ALPPL2     | Homo sapiens alkaline phosphatase, placental-like 2 (ALPPL2), mRNA [NM_031313]                                                                     |
| A_32_P420009  | 0,001209005 | up   | 1,7932116  | ALS2CL     | Homo sapiens ALS2 C-terminal like (ALS2CL), transcript variant 1, mRNA [NM_147129]                                                                 |
| A_21_P0000072 | 0,001730534 | up   | 1,8883623  | ALS2CR11   | Homo sapiens ALS2 cytotrophic lateral sclerosis 2 (juvenile) chromosome region, candidate 11 (ALS2CR11), transcript variant 3, mRNA [NM_001168217] |
| A_23_P256504  | 0,038529847 | up   | 1,5191715  | AMBP       | Homo sapiens alpha-1-microglobulin/bikunin precursor (AMBP), mRNA [NM_001633]                                                                      |
| A_23_P353742  | 0,001261096 | up   | 1,5682698  | AMBRA1     | Homo sapiens autophagy/beclin-1 regulator 1 (AMBRA1), transcript variant 2, mRNA [NM_017749]                                                       |
| A_33_P3395369 | 0,031860378 | down | -1,5717801 | AMD1       | Homo sapiens adenosylmethionine decarboxylase 1 (AMD1), transcript variant 1, mRNA [NM_001634]                                                     |
| A_32_P122226  | 0,005964098 | down | -1,9636006 | AMDHD1     | Homo sapiens amidohydrolase domain containing 1 (AMDHD1), mRNA [NM_152435]                                                                         |
| A_23_P96478   | 0,008781098 | down | -1,5819442 | AMELX      | Homo sapiens amelogenin, X-linked (AMELX), transcript variant 2, mRNA [NM_182681]                                                                  |
| A_23_P48455   | 0,002895262 | down | -2,2500978 | AMN        | Homo sapiens amnion associated transmembrane protein (AMN), mRNA [NM_030943]                                                                       |
| A_33_P3248152 | 0,035998587 | up   | 1,6223426  | AMPD1      | Homo sapiens adenosine monophosphate deaminase 1 (AMPD1), transcript variant 1, mRNA [NM_000036]                                                   |
| A_23_P31273   | 1,93E-04    | down | -3,3505127 | AMPH       | Homo sapiens amphiphysin (AMPH), transcript variant 1, mRNA [NM_001635]                                                                            |
| A_23_P23611   | 0,010142086 | up   | 1,6799506  | AMY1C      | Homo sapiens amylase, alpha 1C (salivary) (AMY1C), mRNA [NM_001008219]                                                                             |
| A_33_P3380837 | 0,003610633 | down | -1,5970545 | AMZ1       | Homo sapiens archaealysin family metalloproteinase 1 (AMZ1), transcript variant 1, mRNA [NM_133463]                                                |
| A_23_P44643   | 0,001730785 | up   | 1,7816619  | ANAPC7     | Homo sapiens anaphase promoting complex subunit 7 (ANAPC7), transcript variant 1, mRNA [NM_016238]                                                 |
| A_23_P216023  | 2,87E-05    | down | -2,6406276 | ANGPT1     | Homo sapiens angiopoietin 1 (ANGPT1), transcript variant 1, mRNA [NM_001146]                                                                       |

|                |                  |            |             |                                                                                                                                               |
|----------------|------------------|------------|-------------|-----------------------------------------------------------------------------------------------------------------------------------------------|
| A_23_P60079    | 1,69E-04 up      | 3,1915596  | ANGPT2      | Homo sapiens angiopoietin 2 (ANGPT2), transcript variant 1, mRNA [NM_001147]                                                                  |
| A_23_P68511    | 9,79E-04 down    | -2,526863  | ANGPT4      | Homo sapiens angiopoietin 4 (ANGPT4), mRNA [NM_015985]                                                                                        |
| A_24_P199484   | 0,011069021 up   | 1,6644821  | ANGPTL1     | Homo sapiens angiopoietin-like 1 (ANGPTL1), mRNA [NM_004673]                                                                                  |
| A_33_P3295358  | 0,003626651 up   | 4,529974   | ANGPTL4     | Homo sapiens angiopoietin-like 4 (ANGPTL4), transcript variant 1, mRNA [NM_139314]                                                            |
| A_23_P216108   | 0,033264194 down | -1,6853294 | ANK1        | Homo sapiens ankyrin 1, erythrocytic (ANK1), transcript variant 3, mRNA [NM_000037]                                                           |
| A_33_P3376321  | 0,03833149 up    | 1,763552   | ANK1        | Homo sapiens ankyrin 1, erythrocytic (ANK1), transcript variant 2, mRNA [NM_020477]                                                           |
| A_24_P162173   | 0,03494861 down  | -1,5669458 | ANK3        | Homo sapiens ankyrin 3, node of Ranvier (ankyrin G) (ANK3), transcript variant 2, mRNA [NM_001149]                                            |
| A_23_P202269   | 0,012309408 up   | 1,595854   | ANK3        | Homo sapiens ankyrin 3, node of Ranvier (ankyrin G) (ANK3), transcript variant 1, mRNA [NM_020987]                                            |
| A_23_P365086   | 5,27E-04 down    | -2,2261803 | ANKF1       | ankyrin repeat and EF-hand domain containing 1 [Source:HGNC Symbol;Acc:HGNC:15803] [ENST00000378392]                                          |
| A_23_P350698   | 0,04327582 up    | 1,7760044  | ANKFN1      | Homo sapiens ankyrin-repeat and fibronectin type III domain containing 1 (ANKFN1), mRNA [NM_153228]                                           |
| A_33_P3300142  | 0,003123338 down | -1,9835418 | ANKFY1      | Homo sapiens ankyrin repeat and FYVE domain containing 1 (ANKFY1), transcript variant 3, mRNA [NM_001257999]                                  |
| A_24_P151834   | 1,59E-04 up      | 1,9421685  | ANKFY1      | ankyrin repeat and FYVE domain containing 1 [Source:HGNC Symbol;Acc:HGNC:20763] [ENST00000570934]                                             |
| A_23_P355623   | 2,98E-04 up      | 1,8783357  | ANKIB1      | Homo sapiens ankyrin repeat and IBR domain containing 1 (ANKIB1), mRNA [NM_019004]                                                            |
| A_33_P3629247  | 2,15E-05 down    | -2,8871994 | ANKMY1      | Homo sapiens ankyrin repeat and MYND domain containing 1 (ANKMY1), transcript variant 2, mRNA [NM_017844]                                     |
| A_23_P20002    | 7,59E-04 down    | -2,0567007 | ANKMY2      | Homo sapiens ankyrin repeat and MYND domain containing 2 (ANKMY2), mRNA [NM_020319]                                                           |
| A_23_P205046   | 0,002181487 up   | 1,8088802  | ANKRD10     | Homo sapiens ankyrin repeat domain 10 (ANKRD10), transcript variant 1, mRNA [NM_017664]                                                       |
| A_24_P324405   | 0,038336452 down | -1,5627742 | ANKRD11     | Homo sapiens ankyrin repeat domain 11 (ANKRD11), transcript variant 2, mRNA [NM_013275]                                                       |
| A_24_P98975    | 0,003115999 up   | 2,1638896  | ANKRD13A    | Homo sapiens ankyrin repeat domain 13A (ANKRD13A), mRNA [NM_033121]                                                                           |
| A_23_P380881   | 0,018299524 up   | 1,5613228  | ANKRD13B    | Homo sapiens ankyrin repeat domain 13B (ANKRD13B), mRNA [NM_152345]                                                                           |
| A_33_P3238941  | 0,023405317 down | -1,6474557 | ANKRD18A    | Homo sapiens ankyrin repeat domain 18A (ANKRD18A), mRNA [NM_147195]                                                                           |
| A_33_P3236698  | 0,02733214 down  | -1,5753028 | ANKRD19P    | Homo sapiens cDNA FLJ77364 complete cds, highly similar to Homo sapiens ankyrin repeat domain 19 (ANKRD19), mRNA. [AK292218]                  |
| A_32_P79190    | 0,02829047 down  | -1,6032921 | ANKRD20A12P | Homo sapiens ankyrin repeat domain 20 family, member A12, pseudogene (ANKRD20A12P), non-coding RNA [NR_046228]                                |
| A_21_P0010552  | 0,010922704 down | -2,678001  | ANKRD20A2   | Homo sapiens ankyrin repeat domain 20 family, member A2 (ANKRD20A2), mRNA [NM_001012421]                                                      |
| A_21_P0013636  | 0,011390762 down | -2,130555  | ANKRD20A8P  | Homo sapiens ankyrin repeat domain 20 family, member A8, pseudogene (ANKRD20A8P), non-coding RNA [NR_003366]                                  |
| A_33_P3283599  | 0,021296803 down | -1,5555745 | ANKRD20A8P  | Homo sapiens ankyrin repeat domain 20 family, member A8, pseudogene (ANKRD20A8P), non-coding RNA [NR_003366]                                  |
| A_23_P153640   | 7,21E-04 up      | 1,589114   | ANKRD27     | Homo sapiens ankyrin repeat domain 27 (VPS9 domain) (ANKRD27), mRNA [NM_032139]                                                               |
| A_33_P3368985  | 0,004434611 up   | 1,6193372  | ANKRD30A    | Homo sapiens ankyrin repeat domain 30A (ANKRD30A), mRNA [NM_052997]                                                                           |
| A_33_P3343452  | 0,010613969 up   | 1,6300339  | ANKRD30B    | Homo sapiens ankyrin repeat domain 30B (ANKRD30B), mRNA [NM_001145029]                                                                        |
| A_24_P917819   | 3,37E-04 up      | 3,1309278  | ANKRD30BP2  | Homo sapiens ankyrin repeat domain 30B pseudogene 2 (ANKRD30BP2), non-coding RNA [NR_026916]                                                  |
| A_21_P0000612  | 0,026807783 up   | 1,5672113  | ANKRD30BP3  | Homo sapiens ankyrin repeat domain 30B pseudogene 3 (ANKRD30BP3), non-coding RNA [NR_033891]                                                  |
| A_32_P516342   | 0,005262137 down | -1,5526334 | ANKRD33     | Homo sapiens ankyrin repeat domain 33 (ANKRD33), transcript variant 2, mRNA [NM_182608]                                                       |
| A_33_P3213468  | 0,047288768 up   | 1,7614316  | ANKRD33B    | Homo sapiens ankyrin repeat domain 33B (ANKRD33B), mRNA [NM_001164440]                                                                        |
| A_33_P3386581  | 0,002379512 up   | 1,5572565  | ANKRD40     | Homo sapiens ankyrin repeat domain 40 (ANKRD40), mRNA [NM_052855]                                                                             |
| A_33_P3315325  | 0,04124088 up    | 2,2684429  | ANKRD46     | Homo sapiens ankyrin repeat domain 46 (ANKRD46), transcript variant 4, mRNA [NM_001270379]                                                    |
| A_33_P3267305  | 0,017259978 up   | 1,5573055  | ANKRD52     | Homo sapiens ankyrin repeat domain 52 (ANKRD52), mRNA [NM_173595]                                                                             |
| A_33_P3278455  | 0,01209993 up    | 1,5690844  | ANKRD6      | Homo sapiens ankyrin repeat domain 6 (ANKRD6), transcript variant 2, mRNA [NM_001242811]                                                      |
| A_23_P131875   | 0,02429793 down  | -1,7589577 | ANKRD60     | ankyrin repeat domain 60 [Source:HGNC Symbol;Acc:HGNC:16217] [ENST00000457363]                                                                |
| A_33_P3321522  | 0,019463852 down | -1,9857504 | ANKRD61     | Homo sapiens ankyrin repeat domain 61 (ANKRD61), mRNA [NM_001271700]                                                                          |
| A_21_P0014906  | 0,008241392 up   | 2,303644   | ANKRD62     | Homo sapiens ankyrin repeat domain 62 (ANKRD62), mRNA [NM_001277333]                                                                          |
| A_33_P3215298  | 0,00331886 up    | 1,6017898  | ANKRD62     | Homo sapiens ankyrin repeat domain 62 (ANKRD62), mRNA [NM_001277333]                                                                          |
| A_21_P0000033  | 0,001027453 down | -1,7841551 | ANKRD66     | Homo sapiens ankyrin repeat domain 66 (ANKRD66), mRNA [NM_001162435]                                                                          |
| A_33_P3315510  | 0,00700174 down  | -2,2131946 | ANKS1A      | Homo sapiens ankyrin repeat and sterile alpha motif domain containing 1A, mRNA (cDNA clone MGC:42354 IMAGE:4819948), complete cds. [BC031934] |
| A_33_P3258003  | 0,012545034 up   | 2,5905426  | ANKS1B      | Homo sapiens ankyrin repeat and sterile alpha motif domain containing 1B (ANKS1B), transcript variant 1, mRNA [NM_152788]                     |
| A_23_P119907   | 0,005921348 up   | 1,5092171  | ANKZF1      | Homo sapiens ankyrin repeat and zinc finger domain containing 1 (ANKZF1), transcript variant 1, mRNA [NM_018089]                              |
| A_24_P87036    | 0,047388364 up   | 1,8801037  | ANO1        | Homo sapiens anoctamin 1, calcium activated chloride channel (ANO1), transcript variant 1, mRNA [NM_018043]                                   |
| A_23_P409093   | 0,01690907 up    | 2,5766165  | ANO4        | Homo sapiens anoctamin 4 (ANO4), transcript variant 3, mRNA [NM_178826]                                                                       |
| A_33_P3247342  | 0,026236312 down | -1,945768  | ANO7        | Homo sapiens anoctamin 7 (ANO7), transcript variant NGEP-S, mRNA [NM_001001666]                                                               |
| A_23_P14649    | 3,28E-04 down    | -1,9868567 | ANP32A-IT1  | Homo sapiens ANP32A intronic transcript 1 (non-protein coding) (ANP32A-IT1), long non-coding RNA [NR_026808]                                  |
| A_23_P92520    | 0,005396168 down | -2,222245  | ANP32C      | Homo sapiens acidic (leucine-rich) nuclear phosphoprotein 32 family, member C (ANP32C), mRNA [NM_012403]                                      |
| A_33_P3334803  | 0,016679745 down | -1,8048469 | ANTXRL      | PREDICTED: Homo sapiens anthrax toxin receptor-like (ANTXRL), misc_RNA [XR_159158]                                                            |
| A_33_P3360296  | 0,007221441 down | -2,1171846 | ANTXRL      | Homo sapiens anthrax toxin receptor-like (ANTXRL), mRNA [NM_001278688]                                                                        |
| A_21_P0010873  | 0,007487498 up   | 2,0783598  | ANTXRLP1    | Homo sapiens anthrax toxin receptor-like pseudogene 1 (ANTXRLP1), transcript variant 2, non-coding RNA [NR_103828]                            |
| A_32_P150632   | 3,38E-05 up      | 2,3079174  | ANXA11      | annexin A11 [Source:HGNC Symbol;Acc:HGNC:535] [ENST00000438331]                                                                               |
| A_32_P148345   | 4,11E-04 down    | -3,3306816 | ANXA2       | Homo sapiens annexin A2 (ANXA2), transcript variant 2, mRNA [NM_001002857]                                                                    |
| A_24_P323114   | 0,026825327 down | -1,5443736 | ANXA2P3     | Homo sapiens annexin A2 pseudogene 3 (ANXA2P3), non-coding RNA [NR_001446]                                                                    |
| A_23_P426305   | 0,004401853 up   | 1,8137885  | AOC3        | Homo sapiens amine oxidase, copper containing 3 (AOC3), transcript variant 1, mRNA [NM_003734]                                                |
| A_33_P3354414  | 0,03652855 up    | 2,1845255  | AOX1        | Homo sapiens aldehyde oxidase 1 (AOX1), mRNA [NM_001159]                                                                                      |
| A_21_P0012040  | 0,040383544 down | -1,5373157 | AOX2P       | Homo sapiens aldehyde oxidase 2 pseudogene (AOX2P), non-coding RNA [NR_001557]                                                                |
| A_19_P00322315 | 0,005855204 up   | 1,8821987  | AOX2P       | Homo sapiens aldehyde oxidase 2 pseudogene (AOX2P), non-coding RNA [NR_001557]                                                                |
| A_21_P0012322  | 0,04839082 down  | -1,5199943 | AP1B1P1     | Homo sapiens adaptor-related protein complex 1, beta 1 subunit pseudogene 1 (AP1B1P1), non-coding RNA [NR_040114]                             |
| A_24_P937306   | 0,01365073 up    | 1,8422337  | AP1S2       | adaptor-related protein complex 1, sigma 2 subunit [Source:HGNC Symbol;Acc:HGNC:560] [ENST00000380291]                                        |

|               |                  |                       |                                                                                                                                          |
|---------------|------------------|-----------------------|------------------------------------------------------------------------------------------------------------------------------------------|
| A_24_P105747  | 0,015969923 up   | 1,5530336 AP1S3       | Homo sapiens adaptor-related protein complex 1, sigma 3 subunit (AP1S3), transcript variant 1, mRNA [NM_001039569]                       |
| A_24_P9883    | 0,003459801 up   | 1,8960917 AP5B1       | Homo sapiens adaptor-related protein complex 5, beta 1 subunit (AP5B1), mRNA [NM_138368]                                                 |
| A_33_P3295655 | 0,005078261 up   | 2,317328 APBA1        | Homo sapiens amyloid beta (A4) precursor protein-binding, family A, member 1 (APBA1), mRNA [NM_001163]                                   |
| A_33_P3251901 | 0,001223244 down | -1,6067699 APBB2      | Homo sapiens amyloid beta (A4) precursor protein-binding, family B, member 2 (APBB2), transcript variant 1, mRNA [NM_004307]             |
| A_23_P96827   | 0,003259553 down | -1,6744944 APCS       | Homo sapiens amyloid P component, serum (APCS), mRNA [NM_001639]                                                                         |
| A_24_P312692  | 0,001868962 up   | 1,6060324 API5        | Homo sapiens apoptosis inhibitor 5 (API5), transcript variant 2, mRNA [NM_006595]                                                        |
| A_23_P334246  | 0,004398041 up   | 1,5317397 APLF        | Homo sapiens aprataxin and PNKP like factor (APLF), mRNA [NM_173545]                                                                     |
| A_23_P1113393 | 0,023416903 down | -1,6063217 APLN       | Homo sapiens apelin (APLN), mRNA [NM_017413]                                                                                             |
| A_32_P9543    | 0,002336655 up   | 4,6148553 APOBEC3A    | Homo sapiens apolipoprotein B mRNA editing enzyme, catalytic polypeptide-like 3A (APOBEC3A), transcript variant 1, mRNA [NM_145699]      |
| A_32_P347617  | 0,013836287 up   | 1,50879 APOBEC3H      | Homo sapiens apolipoprotein B mRNA editing enzyme, catalytic polypeptide-like 3H (APOBEC3H), transcript variant SV-183, mRNA [NM_181773] |
| A_24_P109214  | 0,002347909 down | -1,508793 APOC1       | Homo sapiens apolipoprotein C-I (APOC1), mRNA [NM_001645]                                                                                |
| A_23_P87491   | 0,037531596 up   | 2,5087702 APOF        | Homo sapiens apolipoprotein F (APOF), mRNA [NM_001638]                                                                                   |
| A_33_P3232523 | 0,011679252 down | 2,3184888 APOL4       | apolipoprotein L, 4 [Source:HGNC Symbol;Acc:HGNC:14867] [ENST00000328429]                                                                |
| A_23_P380857  | 0,02434637 down  | -2,7622771 APOL4      | Homo sapiens apolipoprotein L, 4 (APOL4), transcript variant a, mRNA [NM_030643]                                                         |
| A_24_P9411167 | 0,014520964 down | -2,7115307 APOL6      | Homo sapiens apolipoprotein L, 6 (APOL6), mRNA [NM_030641]                                                                               |
| A_23_P155052  | 0,025400255 up   | 1,746567 APOL6        | Homo sapiens apolipoprotein L, 6 (APOL6), mRNA [NM_030641]                                                                               |
| A_33_P3246108 | 9,03E-04 down    | -2,2307947 APOLD1     | Homo sapiens apolipoprotein L domain containing 1 (APOLD1), transcript variant 1, mRNA [NM_001130415]                                    |
| A_23_P42265   | 0,023211027 down | -1,5572853 APOM       | Homo sapiens apolipoprotein M (APOM), transcript variant 1, mRNA [NM_019101]                                                             |
| A_33_P3369565 | 0,003553233 down | -1,5081879 APTX       | Homo sapiens aprataxin (APTX), transcript variant 11, mRNA [NM_001195252]                                                                |
| A_23_P126613  | 0,03618346 down  | -2,076147 AQP10       | Homo sapiens aquaporin 10 (AQP10), mRNA [NM_080429]                                                                                      |
| A_33_P3217786 | 0,008911069 down | -1,9877217 AQP7P1     | Homo sapiens aquaporin 7 pseudogene 1 (AQP7P1), non-coding RNA [NR_002817]                                                               |
| A_21_P0013643 | 0,016923526 up   | 2,3540564 AQP7P3      | Homo sapiens aquaporin 7 pseudogene 3 (AQP7P3), non-coding RNA [NR_026558]                                                               |
| A_24_P316305  | 0,00225965 up    | 1,5464362 AQR         | aquarius intron-binding spliceosomal factor [Source:HGNC Symbol;Acc:HGNC:29513] [ENST00000156471]                                        |
| A_24_P280378  | 2,23E-05 up      | 1,9253452 AQR         | Homo sapiens aquarius intron-binding spliceosomal factor (AQR), mRNA [NM_014691]                                                         |
| A_33_P3224020 | 0,03939753 down  | -1,6893276 ARAF2      | Homo sapiens v-raf murine sarcoma 3611 viral oncogene homolog pseudogene, mRNA [IMAGE:5295529]. [BC033982]                               |
| A_33_P3416583 | 0,035444465 down | -1,6926707 ARAP1      | Homo sapiens ArfGAP with RhoGAP domain, ankyrin repeat and PH domain 1 (ARAP1), transcript variant 4, mRNA [NM_001135190]                |
| A_32_P83784   | 0,014772935 up   | 1,7045891 ARAP2       | Homo sapiens ArfGAP with RhoGAP domain, ankyrin repeat and PH domain 2 (ARAP2), mRNA [NM_015230]                                         |
| A_23_P167389  | 0,005662123 up   | 1,5801344 ARAP3       | Homo sapiens ArfGAP with RhoGAP domain, ankyrin repeat and PH domain 3 (ARAP3), mRNA [NM_022481]                                         |
| A_33_P3356216 | 0,003940393 down | -1,7887914 ARCN1      | Homo sapiens archaen 1 (ARCN1), transcript variant 1, mRNA [NM_001655]                                                                   |
| A_33_P3419190 | 0,013995755 down | -1,6401076 AREG       | Homo sapiens amphiregulin (AREG), mRNA [NM_001657]                                                                                       |
| A_23_P259071  | 0,001904874 down | -1,9908347 AREG       | Homo sapiens amphiregulin (AREG), mRNA [NM_001657]                                                                                       |
| A_33_P3271925 | 6,00E-05 up      | 1,7544965 ARFGEF2     | Homo sapiens ADP-ribosylation factor guanine nucleotide-exchange factor 2 (brefeldin A-inhibited) (ARFGEF2), mRNA [NM_006420]            |
| A_33_P3209706 | 0,005001717 down | -1,6233346 ARGFX      | Homo sapiens arginine-fifty homeobox (ARGFX), mRNA [NM_001012659]                                                                        |
| A_33_P3349289 | 0,005745707 up   | 2,2340586 ARGFXP2     | Homo sapiens arginine-fifty homeobox pseudogene 2 (ARGFXP2), non-coding RNA [NR_002222]                                                  |
| A_24_P401739  | 4,67E-05 up      | 2,1889362 ARHGAP17    | Homo sapiens Rho GTPase activating protein 17 (ARHGAP17), transcript variant 1, mRNA [NM_001006634]                                      |
| A_33_P3411025 | 0,0017887 down   | -1,8095853 ARHGAP19   | Homo sapiens Rho GTPase activating protein 19 (ARHGAP19), transcript variant 2, mRNA [NM_001204300]                                      |
| A_33_P3319401 | 0,001254876 up   | 1,9754615 ARHGAP21    | Rho GTPase activating protein 21 [Source:HGNC Symbol;Acc:HGNC:23725] [ENST00000476499]                                                   |
| A_23_P115608  | 0,012737622 up   | 1,522334 ARHGAP21     | Homo sapiens Rho GTPase activating protein 21 (ARHGAP21), mRNA [NM_020824]                                                               |
| A_33_P3236030 | 0,006813917 up   | 1,9398439 ARHGAP24    | Rho GTPase activating protein 24 [Source:HGNC Symbol;Acc:HGNC:25361] [ENST00000509709]                                                   |
| A_33_P3228305 | 0,03848363 down  | -1,9320827 ARHGAP26   | Homo sapiens Rho GTPase activating protein 26 (ARHGAP26), transcript variant 1, mRNA [NM_015071]                                         |
| A_33_P3228558 | 0,008444564 up   | 1,7969031 ARHGAP27    | Homo sapiens Rho GTPase activating protein 27 (ARHGAP27), transcript variant 4, mRNA [NM_001282290]                                      |
| A_23_P35045   | 0,043800388 up   | 2,0699978 ARHGAP30    | Homo sapiens Rho GTPase activating protein 30 (ARHGAP30), transcript variant 1, mRNA [NM_001025598]                                      |
| A_24_P349039  | 0,031615544 up   | 1,5194767 ARHGAP31    | Homo sapiens Rho GTPase activating protein 31 (ARHGAP31), mRNA [NM_020754]                                                               |
| A_23_P161686  | 0,023598269 up   | 1,6576315 ARHGAP32    | Homo sapiens Rho GTPase activating protein 32 (ARHGAP32), transcript variant 2, mRNA [NM_014715]                                         |
| A_33_P3313411 | 0,001277117 down | -2,8624554 ARHGAP33   | Homo sapiens Rho GTPase activating protein 33 (ARHGAP33), transcript variant 2, mRNA [NM_001172630]                                      |
| A_23_P72968   | 0,040057488 up   | 1,5615122 ARHGAP36    | Homo sapiens Rho GTPase activating protein 36 (ARHGAP36), transcript variant 1, mRNA [NM_144967]                                         |
| A_33_P3299110 | 1,39E-05 down    | -4,104027 ARHGAP42    | Homo sapiens Rho GTPase activating protein 42 (ARHGAP42), mRNA [NM_152432]                                                               |
| A_33_P3243332 | 0,046721507 down | -1,5194172 ARHGAP42   | Homo sapiens Rho GTPase activating protein 42 (ARHGAP42), mRNA [NM_152432]                                                               |
| A_33_P3410385 | 1,96E-05 down    | -5,0895834 ARHGAP44   | Homo sapiens Rho GTPase activating protein 44 (ARHGAP44), mRNA [NM_014859]                                                               |
| A_24_P41864   | 0,002207561 up   | 3,7018497 ARHGAP6     | Homo sapiens Rho GTPase activating protein 6 (ARHGAP6), transcript variant 3, mRNA [NM_006125]                                           |
| A_23_P64661   | 0,004935765 down | -2,982005 ARHGAP9     | Homo sapiens Rho GTPase activating protein 9 (ARHGAP9), transcript variant 1, mRNA [NM_032496]                                           |
| A_24_P202581  | 0,008445428 up   | 1,6829821 ARHGEF1     | Homo sapiens Rho guanine nucleotide exchange factor (GEF) 1 (ARHGEF1), transcript variant 1, mRNA [NM_199002]                            |
| A_33_P3351356 | 0,023686832 up   | 1,5129212 ARHGEF10    | Rho guanine nucleotide exchange factor (GEF) 10 [Source:HGNC Symbol;Acc:HGNC:14103] [ENST00000398560]                                    |
| A_33_P3799936 | 0,033584837 up   | 1,5934123 ARHGEF10L   | Homo sapiens Rho guanine nucleotide exchange factor (GEF) 10-like (ARHGEF10L), transcript variant 1, mRNA [NM_018125]                    |
| A_33_P3215575 | 0,03050873 up    | 1,6481 ARHGEF10L      | Homo sapiens Rho guanine nucleotide exchange factor (GEF) 10-like (ARHGEF10L), transcript variant 1, mRNA [NM_018125]                    |
| A_23_P49674   | 0,010564775 down | -2,28264 ARHGEF15     | Homo sapiens Rho guanine nucleotide exchange factor (GEF) 15 (ARHGEF15), transcript variant 1, mRNA [NM_173728]                          |
| A_23_P50357   | 0,012724575 up   | 1,5723478 ARHGEF18    | Homo sapiens Rho/Rac guanine nucleotide exchange factor (GEF) 18 (ARHGEF18), transcript variant 1, mRNA [NM_015318]                      |
| A_23_P69100   | 2,16E-04 up      | 2,165012 ARHGEF26     | Homo sapiens Rho guanine nucleotide exchange factor (GEF) 26 (ARHGEF26), transcript variant 2, mRNA [NM_015595]                          |
| A_33_P3405680 | 0,01847384 down  | -2,929358 ARHGEF3-AS1 | Homo sapiens ARHGEF3 antisense RNA 1 (ARHGEF3-AS1), long non-coding RNA [NR_046572]                                                      |
| A_33_P3233099 | 0,006118679 down | -1,6284099 ARHGEF4    | Homo sapiens Rho guanine nucleotide exchange factor (GEF) 4 (ARHGEF4), transcript variant 1, mRNA [NM_015320]                            |
| A_23_P417891  | 0,033574887 up   | 1,7245998 ARHGEF7     | Homo sapiens Rho guanine nucleotide exchange factor (GEF) 7 (ARHGEF7), transcript variant 2, mRNA [NM_145735]                            |

|                |                  |                      |                                                                                                                                         |
|----------------|------------------|----------------------|-----------------------------------------------------------------------------------------------------------------------------------------|
| A_23_P321855   | 2,72E-04 up      | 1,687822 ARHGEF7     | Homo sapiens Rho guanine nucleotide exchange factor (GEF) 7 (ARHGEF7), transcript variant 1, mRNA [NM_003899]                           |
| A_33_P3288904  | 0,006244665 up   | 1,5550225 ARHGEF7    | Homo sapiens Rho guanine nucleotide exchange factor (GEF) 7 (ARHGEF7), transcript variant 1, mRNA [NM_003899]                           |
| A_24_P92952    | 4,22E-04 up      | 1,7907203 ARID1A     | Homo sapiens AT rich interactive domain 1A (SWI-like) (ARID1A), transcript variant 1, mRNA [NM_006015]                                  |
| A_33_P3291877  | 0,003798425 down | -1,530412 ARID1B     | Homo sapiens AT rich interactive domain 1B (SWI1-like) (ARID1B), transcript variant 2, mRNA [NM_020732]                                 |
| A_33_P3272921  | 0,003682695 up   | 1,9864254 ARID3A     | Homo sapiens AT rich interactive domain 3A (BRIGHT-like) (ARID3A), mRNA [NM_005224]                                                     |
| A_33_P3389342  | 5,62E-04 down    | -1,7345865 ARID5A    | Homo sapiens AT rich interactive domain 5A (MRF1-like) (ARID5A), mRNA [NM_212481]                                                       |
| A_24_P85478    | 0,001448648 up   | 1,5707865 ARIH1      | Homo sapiensriadne RBR E3 ubiquitin protein ligase 1 (ARIH1), mRNA [NM_005744]                                                          |
| A_33_P3375553  | 0,013572644 up   | 1,6597234 ARL13A     | Homo sapiens ADP-ribosylation factor-like 13A (ARL13A), transcript variant 3, mRNA [NM_001162491]                                       |
| A_24_P303199   | 0,003442107 down | -2,497777 ARL15      | Homo sapiens ADP-ribosylation factor-like 15 (ARL15), mRNA [NM_019087]                                                                  |
| A_23_P118150   | 4,26E-04 up      | 1,7309519 ARL6IP1    | Homo sapiens ADP-ribosylation factor-like 6 interacting protein 1 (ARL6IP1), mRNA [NM_015161]                                           |
| A_32_P146113   | 0,015494243 up   | 2,5578406 ARMC12     | Homo sapiens armadillo repeat containing 12 (ARMC12), transcript variant 1, mRNA [NM_145028]                                            |
| A_23_P86540    | 0,007605813 up   | 1,9427668 ARMC3      | Homo sapiens armadillo repeat containing 3 (ARMC3), transcript variant 1, mRNA [NM_173081]                                              |
| A_33_P3364826  | 0,04771689 up    | 2,087339 ARMC4       | armadillo repeat containing 4 [Source:HGNC Symbol;Acc:HGNC:25583] [ENST00000434029]                                                     |
| A_23_P15375    | 0,002954034 down | -1,5836288 ARMC7     | armadillo repeat containing 7 [Source:HGNC Symbol;Acc:HGNC:26168] [ENST00000245543]                                                     |
| A_33_P3425356  | 4,75E-04 up      | 1,5505869 ARMC8      | Homo sapiens armadillo repeat containing 8 (ARMC8), transcript variant 2, mRNA [NM_015396]                                              |
| A_33_P3232334  | 0,00419129 down  | -3,2951999 ARMCX4    | armadillo repeat containing, X-linked 4 [Source:HGNC Symbol;Acc:HGNC:28615] [ENST00000430461]                                           |
| A_23_P162037   | 0,012158245 up   | 1,5645332 ARNTL      | Homo sapiens aryl hydrocarbon receptor nuclear translocator-like (ARNTL), transcript variant 3, mRNA [NM_001030273]                     |
| A_24_P37540    | 0,028799871 up   | 1,5324749 ARPC4-TLL3 | Homo sapiens ARPC4-TLL3 readthrough (ARPC4-TLL3), mRNA [NM_001198793]                                                                   |
| A_24_P313262   | 8,15E-04 up      | 1,8738422 ARPP19     | Homo sapiens cAMP-regulated phosphoprotein, 19kDa (ARPP19), mRNA [NM_006628]                                                            |
| A_24_P344976   | 0,00827331 down  | -2,1638367 ARR3      | Homo sapiens arrestin 3, retinal (X-arrestin) (ARR3), mRNA [NM_004312]                                                                  |
| A_23_P391607   | 1,54E-04 up      | 1,6721184 ARRDC1     | Homo sapiens arrestin domain containing 1 (ARRDC1), mRNA [NM_152285]                                                                    |
| A_24_P22976    | 1,10E-05 up      | 2,403279 ARRDC2      | Homo sapiens arrestin domain containing 2 (ARRDC2), transcript variant 2, mRNA [NM_001025604]                                           |
| A_24_P339416   | 0,001750056 down | -2,5286026 ARSG      | Homo sapiens arylsulfatase G (ARSG), transcript variant 1, mRNA [NM_014960]                                                             |
| A_33_P3298349  | 0,011733079 down | -2,3836076 ART5      | Homo sapiens ADP-ribosyltransferase 5 (ART5), transcript variant 3, mRNA [NM_001297668]                                                 |
| A_24_P416961   | 0,025857667 down | -2,5112412 ARVCF     | Homo sapiens armadillo repeat gene deleted in velocardiofacial syndrome (ARVCF), mRNA [NM_001670]                                       |
| A_23_P306223   | 0,007069324 down | -2,377259 ARX        | Homo sapiens aristaless related homeobox (ARX), mRNA [NM_139058]                                                                        |
| A_23_P146325   | 0,002491754 up   | 1,8358874 ASAP1-IT1  | Homo sapiens ASAP1 intronic transcript 1 (non-protein coding) (ASAP1-IT1), long non-coding RNA [NR_002765]                              |
| A_24_P362540   | 0,003638036 up   | 2,1051774 ASAP2      | Homo sapiens ArfGAP with SH3 domain, ankyrin repeat and PH domain 2 (ASAP2), transcript variant 1, mRNA [NM_003887]                     |
| A_33_P3263614  | 2,93E-04 down    | -2,066154 ASAP3      | Homo sapiens ArfGAP with SH3 domain, ankyrin repeat and PH domain 3 (ASAP3), transcript variant 2, mRNA [NM_001143778]                  |
| A_23_P114689   | 0,028896725 up   | 1,522755 ASAP3       | Homo sapiens ArfGAP with SH3 domain, ankyrin repeat and PH domain 3 (ASAP3), transcript variant 1, mRNA [NM_017707]                     |
| A_33_P3290124  | 0,001264147 down | -1,989607 ASB10      | Homo sapiens ankyrin repeat and SOCS box containing 10 (ASB10), transcript variant 1, mRNA [NM_001142459]                               |
| A_33_P3210622  | 3,12E-06 down    | -3,8629391 ASB13     | Homo sapiens ankyrin repeat and SOCS box containing 13 (ASB13), transcript variant 1, mRNA [NM_024701]                                  |
| A_33_P3290139  | 0,009687145 up   | 2,646106 ASB15       | Homo sapiens ankyrin repeat and SOCS box containing 15 (ASB15), transcript variant 2, mRNA [NM_001290258]                               |
| A_33_P3290162  | 1,71E-06 down    | -4,200646 ASB18      | Homo sapiens ankyrin repeat and SOCS box containing 18 (ASB18), mRNA [NM_212556]                                                        |
| A_23_P501319   | 0,001133729 up   | 3,2339606 ASB4       | Homo sapiens ankyrin repeat and SOCS box containing 4 (ASB4), transcript variant 1, mRNA [NM_016116]                                    |
| A_24_P920979   | 1,43E-04 up      | 1,8665576 ASB7       | Homo sapiens ankyrin repeat and SOCS box containing 7 (ASB7), transcript variant 2, mRNA [NM_198243]                                    |
| A_32_P122240   | 0,005807095 down | -2,551313 ASCL5      | Homo sapiens achaete-scute family bHLH transcription factor 5 (ASCL5), mRNA [NM_001270601]                                              |
| A_33_P3250730  | 5,04E-05 down    | -2,2522976 ASIC4     | Homo sapiens acid sensing (proton gated) ion channel family member 4 (ASIC4), mRNA [NM_182847]                                          |
| A_24_P690811   | 0,044123385 down | -2,2649004 ASPDH     | Homo sapiens aspartate dehydrogenase domain containing (ASPDH), transcript variant 2, mRNA [NM_001024656]                               |
| A_23_P91640    | 0,004178115 up   | 1,6600933 ASPHD2     | Homo sapiens aspartate beta-hydroxylase domain containing 2 (ASPHD2), mRNA [NM_020437]                                                  |
| A_33_P3264394  | 0,04293084 down  | -1,8767622 ASPSCR1   | alveolar soft part sarcoma chromosome region, candidate 1 [Source:HGNC Symbol;Acc:HGNC:13825] [ENST00000583693]                         |
| A_33_P3231820  | 0,018145066 down | -1,7157686 ASTL      | Homo sapiens astacin-like metallo-endopeptidase (M12 family) (ASTL), mRNA [NM_001002036]                                                |
| A_23_P301021   | 8,89E-04 up      | 2,6595945 ASTN1      | Homo sapiens astrotactin 1 (ASTN1), transcript variant 1, mRNA [NM_004319]                                                              |
| A_24_P83738    | 0,019653236 down | -1,7760829 ASTN2     | Homo sapiens astrotactin 2 (ASTN2), transcript variant 4, mRNA [NM_198188]                                                              |
| A_23_P36464    | 0,001936744 up   | 1,6653413 ASUN       | Homo sapiens asunder spermatogenesis regulator (ASUN), mRNA [NM_018164]                                                                 |
| A_33_P3217238  | 0,027898796 up   | 1,5011556 ATAD2      | Homo sapiens ATPase family, AAA domain containing 2 (ATAD2), mRNA [NM_014109]                                                           |
| A_32_P191004   | 2,70E-04 up      | 1,6246657 ATAD2B     | Homo sapiens ATPase family, AAA domain containing 2B (ATAD2B), transcript variant 1, mRNA [NM_017552]                                   |
| A_24_P113144   | 0,022431966 up   | 2,133683 ATAD5       | Homo sapiens ATPase family, AAA domain containing 5 (ATAD5), mRNA [NM_024857]                                                           |
| A_33_P3305458  | 0,015403907 up   | 1,5969318 ATF6B      | Homo sapiens activating transcription factor 6 beta (ATF6B), transcript variant 1, mRNA [NM_004381]                                     |
| A_19_P00809417 | 0,045554437 down | -1,6165559 ATF7IP2   | activating transcription factor 7 interacting protein 2 [Source:HGNC Symbol;Acc:HGNC:20397] [ENST00000570163]                           |
| A_23_P36305    | 0,002848527 up   | 1,581645 ATG16L2     | Homo sapiens autophagy related 16-like 2 (S. cerevisiae) (ATG16L2), mRNA [NM_033388]                                                    |
| A_33_P3342160  | 2,55E-04 up      | 1,8004694 ATG2B      | Homo sapiens autophagy related 2B (ATG2B), mRNA [NM_018036]                                                                             |
| A_33_P3396807  | 0,004599845 down | -1,6846886 ATG4C     | Homo sapiens autophagy related 4C, cysteine peptidase (ATG4C), transcript variant 1, mRNA [NM_032852]                                   |
| A_32_P154053   | 0,003425434 up   | 3,0233526 ATG9B      | Homo sapiens autophagy related 9B (ATG9B), transcript variant 1, mRNA [NM_173681]                                                       |
| A_33_P3357591  | 0,014687812 up   | 1,7591987 ATHL1      | Homo sapiens ATH1, acid trehalase-like 1 (yeast) (ATHL1), mRNA [NM_025092]                                                              |
| A_23_P13885    | 0,015656002 up   | 1,5485855 ATN1       | Homo sapiens atrophin 1 (ATN1), transcript variant 1, mRNA [NM_001007026]                                                               |
| A_33_P3392740  | 0,04319735 down  | -1,9271152 ATOH8     | Homo sapiens mRNA; cDNA DKFZp761E2117 (from clone DKFZp761E2117), [AL831857]                                                            |
| A_24_P161973   | 0,001358852 up   | 1,6857262 ATP11A     | Homo sapiens ATPase, class VI, type 11A (ATP11A), transcript variant 1, mRNA [NM_015205]                                                |
| A_33_P3269423  | 0,014485754 down | -2,0106888 ATP11AUN  | Homo sapiens ATP11A upstream neighbor (ATP11AUN), mRNA [NM_207440]                                                                      |
| A_24_P399942   | 0,001956185 up   | 1,8498672 ATP11C     | Homo sapiens ATPase, class VI, type 11C (ATP11C), transcript variant 1, mRNA [NM_173694]                                                |
| A_23_P1072     | 0,016523637 up   | 1,6457088 ATP1A1     | Homo sapiens ATPase, Na <sup>+</sup> /K <sup>+</sup> transporting, alpha 1 polypeptide (ATP1A1), transcript variant 1, mRNA [NM_000701] |

|                |             |      |            |             |                                                                                                                                                 |
|----------------|-------------|------|------------|-------------|-------------------------------------------------------------------------------------------------------------------------------------------------|
| A_33_P3283669  | 9,24E-05    | down | -3,0959156 | ATP1A3      | Homo sapiens ATPase, Na+/K+ transporting, alpha 3 polypeptide (ATP1A3), transcript variant 3, mRNA [NM_001256214]                               |
| A_24_P91832    | 0,007252164 | up   | 1,5988394  | ATP1B4      | Homo sapiens ATPase, Na+/K+ transporting, beta 4 polypeptide (ATP1B4), transcript variant 2, mRNA [NM_012069]                                   |
| A_33_P3342830  | 5,22E-04    | down | -2,1896355 | ATP2A1      | Homo sapiens ATPase, Ca++ transporting, cardiac muscle, fast twitch 1 (ATP2A1), transcript variant b, mRNA [NM_173201]                          |
| A_24_P141786   | 0,029243087 | down | -1,5651772 | ATP2A2      | Homo sapiens ATPase, Ca++ transporting, cardiac muscle, slow twitch 2 (ATP2A2), transcript variant a, mRNA [NM_001681]                          |
| A_24_P202319   | 0,010893703 | down | -1,6152818 | ATP2A3      | Homo sapiens ATPase, Ca++ transporting, ubiquitous (ATP2A3), transcript variant 7, mRNA [NM_174958]                                             |
| A_23_P207632   | 0,004446442 | up   | 1,5122726  | ATP2A3      | Homo sapiens ATPase, Ca++ transporting, ubiquitous (ATP2A3), transcript variant 5, mRNA [NM_174953]                                             |
| A_33_P3267185  | 0,008981112 | down | -1,8199997 | ATP2B1      | Homo sapiens ATPase, Ca++ transporting, plasma membrane 1 (ATP2B1), transcript variant 1, mRNA [NM_001001323]                                   |
| A_33_P3393851  | 4,88E-05    | down | -5,0949497 | ATP2B2      | ATPase, Ca++ transporting, plasma membrane 2 [Source:HGNC Symbol;Acc:HGNC:815] [ENST00000467702]                                                |
| A_33_P3400973  | 1,19E-05    | down | -4,057551  | ATP2B2      | Homo sapiens ATPase, Ca++ transporting, plasma membrane 2 (ATP2B2), transcript variant 1, mRNA [NM_001001331]                                   |
| A_24_P405205   | 6,25E-04    | up   | 2,2330663  | ATP2B4      | Homo sapiens ATPase, Ca++ transporting, plasma membrane 4 (ATP2B4), transcript variant 1, mRNA [NM_001001396]                                   |
| A_19_P00317360 | 0,03898048  | down | -3,1237462 | ATP2C1      | Homo sapiens ATPase, Ca++ transporting, type 2C, member 1 (ATP2C1), transcript variant 8, mRNA [NM_001199182]                                   |
| A_23_P146146   | 0,006398266 | down | -1,8038149 | ATP6V0D2    | Homo sapiens ATPase, H+ transporting, lysosomal 38kDa, V0 subunit d2 (ATP6V0D2), mRNA [NM_152565]                                               |
| A_33_P3210885  | 0,029625334 | down | -1,5526893 | ATP7A       | Homo sapiens ATPase, Cu++ transporting, alpha polypeptide (ATP7A), transcript variant 2, mRNA [NM_001282224]                                    |
| A_33_P3327772  | 0,001335359 | down | -2,3949463 | ATP7A       | Homo sapiens ATPase, Cu++ transporting, alpha polypeptide (ATP7A), transcript variant 1, mRNA [NM_000052]                                       |
| A_23_P79108    | 0,006407671 | up   | 2,5874522  | ATP8B3      | Homo sapiens ATPase, aminophospholipid transporter, class I, type 8B, member 3 (ATP8B3), transcript variant 1, mRNA [NM_138813]                 |
| A_33_P3362498  | 0,006385105 | down | -1,6338238 | ATR         | Homo sapiens ATR serine/threonine kinase (ATR), mRNA [NM_001184]                                                                                |
| A_24_P371425   | 1,60E-04    | down | -1,9645659 | ATRIP       | Homo sapiens ATR interacting protein (ATRIP), transcript variant 2, mRNA [NM_032166]                                                            |
| A_33_P3343473  | 4,20E-05    | down | -3,3012915 | ATRNL1      | Homo sapiens attractin-like 1 (ATRNL1), transcript variant 1, mRNA [NM_207303]                                                                  |
| A_33_P3612589  | 0,022663072 | up   | 1,5475882  | ATRX        | Homo sapiens alpha thalassemia/mental retardation syndrome X-linked (ATRX), transcript variant 1, mRNA [NM_000489]                              |
| A_33_P3409099  | 1,20E-04    | up   | 2,1457882  | ATXN1       | Homo sapiens ataxin 1 (ATXN1), transcript variant 1, mRNA [NM_000332]                                                                           |
| A_33_P3256500  | 0,002576867 | up   | 1,8549869  | ATXN2       | ataxin 2 [Source:HGNC Symbol;Acc:HGNC:10555] [ENST00000392645]                                                                                  |
| A_23_P389907   | 1,56E-04    | up   | 1,8955917  | ATXN2       | Homo sapiens ataxin 2 (ATXN2), mRNA [NM_002973]                                                                                                 |
| A_23_P317207   | 0,040375687 | down | -1,7810861 | ATXN7L2     | Homo sapiens ataxin 7-like 2 (ATXN7L2), mRNA [NM_153340]                                                                                        |
| A_24_P263956   | 6,70E-05    | up   | 2,0723948  | ATXN7L3B    | Homo sapiens ataxin 7-like 3B (ATXN7L3B), mRNA [NM_001136262]                                                                                   |
| A_33_P3869455  | 0,003416931 | down | -2,2581131 | ATXN8       | Homo sapiens ataxin 8 (ATXN8) mRNA, partial cds. [DQ641254]                                                                                     |
| A_33_P3330211  | 0,033744603 | down | -1,6613653 | AUTS2       | Homo sapiens autism susceptibility candidate 2 (AUTS2), transcript variant 3, mRNA [NM_001127232]                                               |
| A_23_P72340    | 0,035358205 | down | -1,5781926 | AVPR1B      | Homo sapiens arginine vasopressin receptor 1B (AVPR1B), mRNA [NM_000707]                                                                        |
| A_21_P0013915  | 0,003318351 | down | -2,197826  | AZFP        | Homo sapiens AML-associated zinc finger protein (AZFP) mRNA, partial cds. [AY371499]                                                            |
| A_21_P0014818  | 0,004663016 | up   | 1,8332663  | AZFP        | Homo sapiens AML-associated zinc finger protein (AZFP) mRNA, partial cds. [AY371499]                                                            |
| A_24_P267664   | 0,005560591 | down | -1,7212967 | B3GALT5-AS1 | Homo sapiens B3GALT5 antisense RNA 1 (B3GALT5-AS1), transcript variant 2, long non-coding RNA [NR_026543]                                       |
| A_33_P3266536  | 9,14E-04    | up   | 2,9250572  | B3GALT5-AS1 | Homo sapiens B3GALT5 antisense RNA 1 (B3GALT5-AS1), transcript variant 2, long non-coding RNA [NR_026543]                                       |
| A_23_P500956   | 1,71E-04    | up   | 1,937736   | B3GNT2      | Homo sapiens UDP-GlcNAc:betaGal beta-1,3-N-acetylglucosaminyltransferase 2 (B3GNT2), mRNA [NM_006577]                                           |
| A_23_P18372    | 3,91E-04    | up   | 1,830105   | B3GNT5      | Homo sapiens UDP-GlcNAc:betaGal beta-1,3-N-acetylglucosaminyltransferase 5 (B3GNT5), mRNA [NM_032047]                                           |
| A_23_P39755    | 8,00E-06    | down | -2,4359066 | B3GNT7      | Homo sapiens UDP-GlcNAc:betaGal beta-1,3-N-acetylglucosaminyltransferase 7 (B3GNT7), mRNA [NM_145236]                                           |
| A_23_P331211   | 0,009388549 | down | -3,4637957 | B4GALNT2    | Homo sapiens beta-1,4-N-acetyl-galactosaminyl transferase 2 (B4GALNT2), transcript variant 1, mRNA [NM_153446]                                  |
| A_23_P152678   | 0,012109761 | down | -1,7475814 | B9D1        | Homo sapiens B9 protein domain 1 (B9D1), transcript variant 2, mRNA [NM_015681]                                                                 |
| A_24_P176714   | 0,001396947 | down | -1,8995298 | B9D1        | Homo sapiens B9 protein domain 1 (B9D1), transcript variant 2, mRNA [NM_015681]                                                                 |
| A_33_P3282973  | 0,022270218 | down | -1,616956  | BAALC       | brain and acute leukemia, cytoplasmic [Source:HGNC Symbol;Acc:HGNC:14333] [ENST00000297574]                                                     |
| A_33_P3460043  | 0,008309009 | down | -1,8965774 | BAALC-AS2   | Homo sapiens BAALC antisense RNA 2 (BAALC-AS2), long non-coding RNA [NR_027071]                                                                 |
| A_23_P211047   | 0,006471936 | up   | 1,5013947  | BACH1       | Homo sapiens BTB and CNC homology 1, basic leucine zipper transcription factor 1 (BACH1), transcript variant 1, mRNA [NM_206866]                |
| A_33_P3277714  | 1,30E-04    | up   | 2,7034454  | BACH2       | PREDICTED: Homo sapiens BTB and CNC homology 1, basic leucine zipper transcription factor 2 (BACH2), transcript variant X3, mRNA [XM_006715545] |
| A_23_P30634    | 0,012915991 | up   | 1,8272383  | BACH2       | Homo sapiens BTB and CNC homology 1, basic leucine zipper transcription factor 2 (BACH2), transcript variant 1, mRNA [NM_021813]                |
| A_24_P126262   | 0,002597489 | down | -1,9638956 | BAGE4       | Homo sapiens B melanoma antigen family, member 4 (BAGE4), mRNA [NM_181704]                                                                      |
| A_23_P49539    | 3,87E-04    | up   | 1,9214773  | BAHCC1      | Homo sapiens BAH domain and coiled-coil containing 1 (BAHCC1), mRNA [NM_001291324]                                                              |
| A_23_P61810    | 0,006985195 | up   | 1,5212247  | BAIAP2      | Homo sapiens BAI1-associated protein 2 (BAIAP2), transcript variant 1, mRNA [NM_017450]                                                         |
| A_23_P315836   | 0,020893224 | up   | 1,8045979  | BAIAP2      | Homo sapiens BAI1-associated protein 2 (BAIAP2), transcript variant 2, mRNA [NM_017451]                                                         |
| A_33_P3262575  | 0,018705232 | up   | 1,5705003  | BAIAP2L1    | Homo sapiens BAI1-associated protein 2-like 1 (BAIAP2L1), mRNA [NM_018842]                                                                      |
| A_23_P10232    | 0,045140605 | down | -1,588413  | BANK1       | Homo sapiens B-cell scaffold protein with ankyrin repeats 1 (BANK1), transcript variant 1, mRNA [NM_017935]                                     |
| A_33_P3341144  | 0,001898305 | up   | 1,6344742  | BAX         | Homo sapiens BCL2-associated X protein (BAX), transcript variant beta, mRNA [NM_004324]                                                         |
| A_23_P215449   | 2,30E-04    | up   | 1,7666466  | BAZ1B       | Homo sapiens bromodomain adjacent to zinc finger domain, 1B (BAZ1B), mRNA [NM_032408]                                                           |
| A_33_P3321577  | 3,60E-04    | up   | 1,5970042  | BAZ1B       | Homo sapiens bromodomain adjacent to zinc finger domain, 1B (BAZ1B), mRNA [NM_032408]                                                           |
| A_23_P203841   | 4,26E-05    | up   | 2,1134968  | BAZ2A       | Homo sapiens bromodomain adjacent to zinc finger domain, 2A (BAZ2A), transcript variant 1, mRNA [NM_013449]                                     |
| A_23_P120048   | 3,92E-05    | up   | 1,9111196  | BAZ2B       | Homo sapiens bromodomain adjacent to zinc finger domain, 2B (BAZ2B), transcript variant 1, mRNA [NM_013450]                                     |
| A_23_P5785     | 0,034858283 | down | -1,5196817 | BBS5        | Homo sapiens Bardet-Biedl syndrome 5 (BBS5), mRNA [NM_152384]                                                                                   |
| A_33_P3360087  | 0,01705025  | down | -2,2011354 | BBS9        | Homo sapiens Bardet-Biedl syndrome 9 (BBS9), transcript variant 1, mRNA [NM_014451]                                                             |
| A_33_P3369034  | 0,005917535 | up   | 1,5353501  | BCAR1       | Homo sapiens breast cancer anti-estrogen resistance 1 (BCAR1), transcript variant 1, mRNA [NM_001170714]                                        |
| A_33_P3395738  | 0,017151585 | up   | 1,8121217  | BCAR1       | Homo sapiens cDNA FLJ45059 fis, clone BRAWH3023274. [AK127004]                                                                                  |
| A_23_P97394    | 0,00139124  | up   | 2,4571218  | BCAR3       | Homo sapiens breast cancer anti-estrogen resistance 3 (BCAR3), transcript variant 2, mRNA [NM_003567]                                           |
| A_33_P3389852  | 7,88E-04    | down | -2,2945647 | BCAS3       | Homo sapiens breast carcinoma amplified sequence 3 (BCAS3), transcript variant 2, mRNA [NM_017679]                                              |
| A_24_P1255     | 0,012659968 | up   | 1,6957777  | BCCIP       | Homo sapiens BRCA2 and CDKN1A interacting protein (BCCIP), transcript variant C, mRNA [NM_078469]                                               |
| A_21_P0000540  | 0,007890617 | down | -1,6423104 | BCDIN3D-AS1 | Homo sapiens BCDIN3D antisense RNA 1 (BCDIN3D-AS1), transcript variant 3, long non-coding RNA [NR_027500]                                       |

|               |             |      |            |           |                                                                                                                                        |
|---------------|-------------|------|------------|-----------|----------------------------------------------------------------------------------------------------------------------------------------|
| A_23_P212050  | 7,41E-04    | down | -3,1648295 | BCHE      | Homo sapiens butyrylcholinesterase (BCHE), mRNA [NM_000055]                                                                            |
| A_33_P3236628 | 0,030094031 | up   | 2,240844   | BCKDHA    | branched chain keto acid dehydrogenase E1, alpha polypeptide [Source:HGNC Symbol;Acc:HGNC:986] [ENST00000595085]                       |
| A_33_P3355185 | 0,03931582  | down | -1,6604134 | BCL2      | Homo sapiens B-cell CLL/lymphoma 2 (BCL2), transcript variant beta, mRNA [NM_000657]                                                   |
| A_23_P152002  | 0,003998983 | up   | 3,5884342  | BCL2A1    | Homo sapiens BCL2-related protein A1 (BCL2A1), transcript variant 1, mRNA [NM_004049]                                                  |
| A_23_P321703  | 0,029859778 | up   | 1,5435159  | BCL2A1    | Homo sapiens BCL2-related protein A1 (BCL2A1), transcript variant 1, mRNA [NM_004049]                                                  |
| A_23_P210886  | 0,008138884 | up   | 1,8574662  | BCL2L1    | Homo sapiens BCL2-like 1 (BCL2L1), transcript variant 1, mRNA [NM_138578]                                                              |
| A_24_P122921  | 0,04997349  | up   | 1,5144498  | BCL2L11   | Homo sapiens BCL2-like 11 (apoptosis facilitator) (BCL2L11), transcript variant 1, mRNA [NM_138621]                                    |
| A_33_P3373775 | 7,53E-04    | down | -2,0600271 | BCL2L15   | Homo sapiens BCL2-like 15 (BCL2L15), mRNA [NM_001010922]                                                                               |
| A_33_P3408177 | 0,009076105 | down | -2,2645876 | BCL2L15   | Homo sapiens BCL2-like 15 (BCL2L15), mRNA [NM_001010922]                                                                               |
| A_23_P57856   | 0,001324288 | up   | 1,8052293  | BCL6      | Homo sapiens B-cell CLL/lymphoma 6 (BCL6), transcript variant 2, mRNA [NM_001130845]                                                   |
| A_23_P324813  | 0,031495452 | up   | 2,3570411  | BCL6B     | Homo sapiens B-cell CLL/lymphoma 6, member B (BCL6B), mRNA [NM_181844]                                                                 |
| A_23_P382602  | 0,004127504 | down | -1,8549685 | BCL9      | Homo sapiens B-cell CLL/lymphoma 9 (BCL9), mRNA [NM_004326]                                                                            |
| A_24_P134816  | 0,002411928 | up   | 1,8462732  | BCL9L     | Homo sapiens B-cell CLL/lymphoma 9-like (BCL9L), mRNA [NM_182557]                                                                      |
| A_23_P124300  | 0,019574344 | down | -2,192181  | BCO1      | Homo sapiens beta-carotene oxygenase 1 (BCO1), mRNA [NM_017429]                                                                        |
| A_33_P3261353 | 0,007539886 | down | -1,7592189 | BCORP1    | Homo sapiens BCL6 corepressor pseudogene 1 (BCORP1), transcript variant 1, non-coding RNA [NR_033732]                                  |
| A_21_P0014929 | 0,001336881 | up   | 2,708813   | BCR       | Homo sapiens breakpoint cluster region (BCR), transcript variant 1, mRNA [NM_004327]                                                   |
| A_32_P56713   | 0,03094396  | up   | 1,5761756  | BCR       | Homo sapiens breakpoint cluster region (BCR), transcript variant 1, mRNA [NM_004327]                                                   |
| A_24_P23951   | 5,67E-04    | up   | 1,8380742  | BCRP2     | Homo sapiens breakpoint cluster region pseudogene 2 (BCRP2), non-coding RNA [NR_037566]                                                |
| A_24_P940776  | 6,57E-04    | up   | 1,6054363  | BDP1      | Homo sapiens B double prime 1, subunit of RNA polymerase III transcription initiation factor IIIB (BDP1), mRNA [NM_018429]             |
| A_21_P0000137 | 0,035239317 | down | -1,6254718 | BEAN1     | Homo sapiens brain expressed, associated with NEDD4, 1 (BEAN1), transcript variant 4, mRNA [NM_001197224]                              |
| A_33_P3418234 | 0,003316664 | down | -2,173397  | BECN1P1   | Homo sapiens beclin 1, autophagy related, pseudogene 1 (BECN1P1), mRNA [NM_001290693]                                                  |
| A_33_P3322539 | 0,013588826 | down | -2,0744846 | BEND2     | Homo sapiens BEN domain containing 2 (BEND2), transcript variant 2, mRNA [NM_001184767]                                                |
| A_23_P904     | 0,014026511 | up   | 1,8615069  | BEND5     | Homo sapiens BEN domain containing 5 (BEND5), transcript variant 1, mRNA [NM_024603]                                                   |
| A_23_P376188  | 0,047684956 | up   | 1,5018283  | BEND7     | Homo sapiens BEN domain containing 7 (BEND7), transcript variant 2, mRNA [NM_001100912]                                                |
| A_23_P16225   | 0,002999725 | down | -5,7396145 | BEST2     | Homo sapiens bestrophin 2 (BEST2), mRNA [NM_017682]                                                                                    |
| A_33_P3330384 | 0,002154321 | down | -2,3778203 | BET1L     | Homo sapiens Bet1 golgi vesicular membrane trafficking protein-like (BET1L), transcript variant 2, mRNA [NM_016526]                    |
| A_33_P3245178 | 0,04616858  | down | -2,3291366 | BEX2      | Homo sapiens brain expressed X-linked 2 (BEX2), transcript variant 1, mRNA [NM_001168399]                                              |
| A_24_P57898   | 0,009359345 | down | -2,2560744 | BHLHE23   | Homo sapiens basic helix-loop-helix family, member e23 (BHLHE23), mRNA [NM_080606]                                                     |
| A_24_P268676  | 4,18E-04    | up   | 2,0268736  | BHLHE40   | Homo sapiens basic helix-loop-helix family, member e40 (BHLHE40), mRNA [NM_003670]                                                     |
| A_24_P231829  | 0,042339105 | up   | 1,9852791  | BHMT2     | Homo sapiens betaine-homocysteine S-methyltransferase 2 (BHMT2), transcript variant 1, mRNA [NM_017614]                                |
| A_23_P98350   | 5,47E-05    | up   | 4,6481695  | BIRC3     | Homo sapiens baculoviral IAP repeat containing 3 (BIRC3), transcript variant 1, mRNA [NM_001165]                                       |
| A_23_P419624  | 0,005530147 | up   | 1,5084311  | BLCAP     | Homo sapiens bladder cancer associated protein (BLCAP), transcript variant 1, mRNA [NM_006698]                                         |
| A_33_P3398548 | 0,001195801 | up   | 1,7616756  | BLZF1     | Homo sapiens basic leucine zipper nuclear factor 1 (BLZF1), mRNA [NM_003666]                                                           |
| A_23_P314115  | 1,51E-04    | up   | 1,7129883  | BMI1      | Homo sapiens BMI1 proto-oncogene, polycomb ring finger (BMI1), mRNA [NM_005180]                                                        |
| A_33_P3234043 | 0,04506046  | down | -1,6399586 | BMP1      | bone morphogenetic protein 1 [Source:HGNC Symbol;Acc:HGNC:1067] [ENST00000471755]                                                      |
| A_23_P131588  | 0,044946168 | down | -1,9618815 | BMP10     | Homo sapiens bone morphogenetic protein 10 (BMP10), mRNA [NM_014482]                                                                   |
| A_33_P3237150 | 0,005409889 | up   | 1,909463   | BMP2      | Homo sapiens bone morphogenetic protein 2 (BMP2), mRNA [NM_001200]                                                                     |
| A_23_P81058   | 0,035789225 | up   | 1,8841637  | BMP3      | Homo sapiens bone morphogenetic protein 3 (BMP3), mRNA [NM_001201]                                                                     |
| A_23_P154643  | 0,016173737 | down | -2,2606778 | BMP7      | Homo sapiens bone morphogenetic protein 7 (BMP7), mRNA [NM_001719]                                                                     |
| A_33_P3365878 | 0,001274611 | down | -1,6426723 | BMP8B     | Homo sapiens bone morphogenetic protein 8b (BMP8B), mRNA [NM_001720]                                                                   |
| A_21_P0011284 | 0,009933102 | down | -1,762271  | BMS1P20   | Homo sapiens BMS1 pseudogene 20 (BMS1P20), non-coding RNA [NR_027293]                                                                  |
| A_23_P429689  | 2,67E-04    | up   | 1,8814974  | BOD1L1    | Homo sapiens biorientation of chromosomes in cell division 1-like 1 (BOD1L1), mRNA [NM_148894]                                         |
| A_33_P3407195 | 2,04E-04    | up   | 1,7545211  | BOD1L1    | Homo sapiens biorientation of chromosomes in cell division 1-like 1 (BOD1L1), mRNA [NM_148894]                                         |
| A_33_P3368301 | 0,012896141 | down | -1,6117138 | BOLA3     | Homo sapiens bolA family member 3 (BOLA3), transcript variant 1, mRNA [NM_212552]                                                      |
| A_21_P0002242 | 0,018850703 | down | -1,995305  | BOLA3-AS1 | Homo sapiens BOLA3 antisense RNA 1 (head to head) (BOLA3-AS1), transcript variant 3, long non-coding RNA [NR_045637]                   |
| A_23_P254797  | 2,15E-04    | down | -3,7931802 | BPIFB2    | Homo sapiens BPI fold containing family B, member 2 (BPIFB2), mRNA [NM_025227]                                                         |
| A_24_P122636  | 0,019227099 | down | -1,839708  | BPNT1     | Homo sapiens 3'(2'), 5'-bisphosphate nucleotidase 1 (BPNT1), transcript variant 1, mRNA [NM_006085]                                    |
| A_33_P3269453 | 8,88E-05    | up   | 1,922633   | BPTF      | PREDICTED: Homo sapiens bromodomain PHD finger transcription factor (BPTF), transcript variant X14, mRNA [XM_006721770]                |
| A_33_P3240674 | 9,58E-04    | down | -1,5187112 | BRD3      | Homo sapiens bromodomain containing 3 (BRD3), mRNA [NM_007371]                                                                         |
| A_23_P216689  | 7,17E-04    | up   | 1,7414857  | BRD3      | Homo sapiens bromodomain containing 3 (BRD3), mRNA [NM_007371]                                                                         |
| A_23_P425104  | 0,003342068 | up   | 1,5089451  | BRD4      | Homo sapiens bromodomain containing 4 (BRD4), transcript variant long, mRNA [NM_058243]                                                |
| A_23_P136589  | 0,006057689 | up   | 1,6135938  | BRDT      | Homo sapiens bromodomain, testis-specific (BRDT), transcript variant 1, mRNA [NM_207189]                                               |
| A_33_P3363016 | 0,008024241 | down | -1,8357172 | BRF1      | Homo sapiens BRF1, RNA polymerase III transcription initiation factor 90 kDa subunit (BRF1), transcript variant 8, mRNA [NM_001242790] |
| A_23_P250948  | 9,26E-04    | up   | 1,7824018  | BRPF1     | Homo sapiens bromodomain and PHD finger containing, 1 (BRPF1), transcript variant 1, mRNA [NM_001003694]                               |
| A_24_P414712  | 0,009892587 | up   | 1,8548483  | BRPF3     | Homo sapiens bromodomain and PHD finger containing, 3 (BRPF3), mRNA [NM_015695]                                                        |
| A_33_P3375077 | 0,030378807 | up   | 2,156738   | BRPF3     | Homo sapiens bromodomain and PHD finger containing, 3 (BRPF3), mRNA [NM_015695]                                                        |
| A_32_P489130  | 0,015476787 | up   | 1,6531242  | BRWD3     | Homo sapiens bromodomain and WD repeat domain containing 3 (BRWD3), mRNA [NM_153252]                                                   |
| A_23_P408675  | 5,03E-04    | up   | 1,6197914  | BTAF1     | Homo sapiens BTAF1 RNA polymerase II, B-TFIIID transcription factor-associated, 170kDa (BTAF1), mRNA [NM_003972]                       |
| A_23_P13438   | 0,001888376 | up   | 1,6038172  | BTBD10    | Homo sapiens BTB (POZ) domain containing 10 (BTBD10), transcript variant 2, mRNA [NM_032320]                                           |
| A_33_P3354823 | 0,00290407  | up   | 2,5527203  | BTBD19    | Homo sapiens BTB (POZ) domain containing 19 (BTBD19), mRNA [NM_001136537]                                                              |
| A_24_P134356  | 0,001516066 | up   | 1,6596701  | BTBD3     | Homo sapiens BTB (POZ) domain containing 3 (BTBD3), transcript variant 1, mRNA [NM_014962]                                             |



|                |              |      |            |              |                                                                                                         |
|----------------|--------------|------|------------|--------------|---------------------------------------------------------------------------------------------------------|
| A_32_P113566   | 0,02323099   | down | -1,5212191 | BTBD9        | Homo sapiens BTB (POZ) domain containing 9 (BTBD9), transcript variant 3, mRNA [NM_152733]              |
| A_33_P3277514  | 0,029109191  | up   | 1,7217766  | BTK          | Homo sapiens Bruton agammaglobulinemia tyrosine kinase (BTK), transcript variant 3, mRNA [NM_001287344] |
| A_33_P3358923  | 0,002692393  | up   | 1,5316614  | BTLA         | Homo sapiens B and T lymphocyte associated (BTLA), transcript variant 1, mRNA [NM_181780]               |
| A_33_P3370959  | 0,002619321  | down | -2,8369935 | BTN1A1       | Homo sapiens butyrophilin, subfamily 1, member A1 (BTN1A1), mRNA [NM_001732]                            |
| A_33_P3281577  | 0,007148892  | up   | 1,6669568  | BTN1A1       | Homo sapiens butyrophilin, subfamily 1, member A1 (BTN1A1), mRNA [NM_001732]                            |
| A_21_P0000138  | 0,021222197  | up   | 1,8736105  | BTN2A2       | Homo sapiens butyrophilin, subfamily 2, member A2 (BTN2A2), transcript variant 4, mRNA [NM_001197238]   |
| A_23_P145218   | 0,004865241  | down | -1,5944017 | BTN2A3P      | butyrophilin, subfamily 2, member A3, pseudogene [Source:HGNC Symbol;Acc:HGNC:13229] [ENST00000377662]  |
| A_24_P136470   | 0,001189107  | down | -1,71171   | BTN2A3P      | Homo sapiens butyrophilin, subfamily 2, member A3, pseudogene (BTN2A3P), non-coding RNA [NR_027795]     |
| A_33_P3264731  | 5,50E-04     | down | -1,7097157 | BTNL10       | Homo sapiens butyrophilin-like 10 (BTNL10), mRNA [NM_001287262]                                         |
| A_24_P713668   | 0,001830209  | up   | 1,8137326  | BZW1         | Homo sapiens basic leucine zipper and W2 domains 1 (BZW1), transcript variant 4, mRNA [NM_014670]       |
| A_33_P3376806  | 0,015165294  | down | -2,23423   | C10orf67     | Homo sapiens chromosome 10 open reading frame 67 (C10orf67), mRNA [NM_153714]                           |
| A_21_P0006995  | 0,04882063   | up   | 1,8024592  | C10orf71-AS1 | Homo sapiens C10orf71 antisense RNA 1 (C10orf71-AS1), long non-coding RNA [NR_108038]                   |
| A_33_P3284132  | 0,0016933754 | up   | 2,883197   | C10orf90     | Homo sapiens chromosome 10 open reading frame 90 (C10orf90), mRNA [NM_001004298]                        |
| A_32_P191441   | 0,004085322  | up   | 1,5091099  | C10orf90     | Homo sapiens chromosome 10 open reading frame 90 (C10orf90), mRNA [NM_001004298]                        |
| A_33_P3268863  | 0,001032587  | down | -3,2098944 | C11orf44     | Homo sapiens chromosome 11 open reading frame 44 (C11orf44), mRNA [NM_001271983]                        |
| A_23_P24529    | 0,001431932  | up   | 1,5920888  | C11orf57     | Homo sapiens chromosome 11 open reading frame 57 (C11orf57), transcript variant 1, mRNA [NM_018195]     |
| A_24_P364057   | 0,004171371  | down | -2,026147  | C11orf70     | Homo sapiens chromosome 11 open reading frame 70 (C11orf70), transcript variant 1, mRNA [NM_032930]     |
| A_33_P3247489  | 1,24E-04     | down | -2,005608  | C11orf85     | Homo sapiens chromosome 11 open reading frame 85 (C11orf85), transcript variant 1, mRNA [NM_001037225]  |
| A_24_P392151   | 0,034566443  | up   | 2,1127703  | C11orf86     | Homo sapiens chromosome 11 open reading frame 86 (C11orf86), mRNA [NM_001136485]                        |
| A_33_P3285354  | 0,021742122  | down | -1,5483687 | C11orf95     | Homo sapiens chromosome 11 open reading frame 95 (C11orf95), mRNA [NM_001144936]                        |
| A_24_P876408   | 7,03E-04     | up   | 1,8578663  | C11orf95     | Homo sapiens chromosome 11 open reading frame 95 (C11orf95), mRNA [NM_001144936]                        |
| A_32_P74409    | 0,049087975  | up   | 2,3700185  | C11orf96     | Homo sapiens chromosome 11 open reading frame 96 (C11orf96), mRNA [NM_001145033]                        |
| A_33_P3384148  | 0,014294409  | down | -2,119955  | C12orf40     | Homo sapiens chromosome 12 open reading frame 40 (C12orf40), mRNA [NM_001031748]                        |
| A_32_P228167   | 0,008204586  | up   | 1,5817872  | C12orf50     | Homo sapiens chromosome 12 open reading frame 50 (C12orf50), mRNA [NM_152589]                           |
| A_24_P769672   | 0,001613886  | up   | 1,6958622  | C12orf73     | Homo sapiens chromosome 12 open reading frame 73 (C12orf73), mRNA [NM_001135570]                        |
| A_32_P163089   | 0,011926737  | down | -1,7622283 | C12orf75     | Homo sapiens chromosome 12 open reading frame 75 (C12orf75), mRNA [NM_001145199]                        |
| A_33_P3379811  | 0,008081278  | up   | 1,7449297  | C12orf77     | Homo sapiens chromosome 12 open reading frame 77 (C12orf77), mRNA [NM_001101339]                        |
| A_33_P3606685  | 0,038166415  | up   | 2,2252226  | C12orf80     | Homo sapiens chromosome 12 open reading frame 80 (C12orf80), mRNA [NM_001242696]                        |
| A_33_P3449815  | 0,005411675  | up   | 3,3264139  | C14orf144    | Homo sapiens, clone IMAGE:4098392, mRNA, partial cds. [BC007749]                                        |
| A_23_P379692   | 0,004892612  | up   | 1,5022277  | C14orf178    | Homo sapiens chromosome 14 open reading frame 178 (C14orf178), transcript variant 1, mRNA [NM_174943]   |
| A_23_P372356   | 9,64E-04     | down | -2,7665613 | C15orf32     | Homo sapiens chromosome 15 open reading frame 32 (C15orf32), transcript variant 1, mRNA [NM_153040]     |
| A_23_P26024    | 0,006526126  | up   | 1,8586736  | C15orf48     | Homo sapiens chromosome 15 open reading frame 48 (C15orf48), transcript variant 2, mRNA [NM_032413]     |
| A_23_P163467   | 0,015977236  | up   | 1,6525888  | C15orf52     | Homo sapiens chromosome 15 open reading frame 52 (C15orf52), mRNA [NM_207380]                           |
| A_32_P189211   | 0,00385368   | up   | 1,6179454  | C15orf56     | Homo sapiens chromosome 15 open reading frame 56 (C15orf56), mRNA [NM_001039905]                        |
| A_33_P3407994  | 0,033229604  | up   | 1,6081665  | C15orf59     | Homo sapiens chromosome 15 open reading frame 59 (C15orf59), transcript variant 1, mRNA [NM_001039614]  |
| A_21_P0008654  | 0,030906381  | up   | 2,2401686  | C15orf59-AS1 |                                                                                                         |
| A_21_P0014325  | 0,00792768   | down | -2,7033167 | C16orf47     | Homo sapiens chromosome 16 open reading frame 47 (C16orf47), mRNA [NM_207385]                           |
| A_21_P0000053  | 0,009089874  | up   | 1,6763681  | C16orf52     | Homo sapiens chromosome 16 open reading frame 52 (C16orf52), mRNA [NM_001164579]                        |
| A_23_P414281   | 0,003419568  | down | -2,4759495 | C16orf71     | Homo sapiens chromosome 16 open reading frame 71 (C16orf71), mRNA [NM_139170]                           |
| A_33_P3561747  | 0,005827852  | up   | 3,1427622  | C16orf82     | Homo sapiens chromosome 16 open reading frame 82 (C16orf82), mRNA [NM_001145545]                        |
| A_33_P3417980  | 0,019703312  | down | -1,8801054 | C16orf86     | chromosome 16 open reading frame 86 [Source:HGNC Symbol;Acc:HGNC:33755] [ENST00000459925]               |
| A_33_P3295690  | 0,00491537   | down | -1,570722  | C16orf90     | Homo sapiens chromosome 16 open reading frame 90 (C16orf90), mRNA [NM_001080524]                        |
| A_33_P3309201  | 0,029863568  | up   | 1,892012   | C16orf95     | chromosome 16 open reading frame 95 [Source:HGNC Symbol;Acc:HGNC:40033] [ENST00000562840]               |
| A_32_P212095   | 7,57E-04     | down | -2,2403986 | C17orf105    | Homo sapiens chromosome 17 open reading frame 105 (C17orf105), mRNA [NM_001136483]                      |
| A_33_P3339187  | 2,17E-04     | down | -3,5336208 | C17orf112    | Homo sapiens chromosome 17 open reading frame 112 (C17orf112), mRNA [NM_001243552]                      |
| A_19_P00320517 | 0,01833869   | down | -2,2703955 | C17orf51     | Homo sapiens chromosome 17 open reading frame 51 (C17orf51), mRNA [NM_001113434]                        |
| A_19_P00320842 | 0,008737954  | down | -2,0490916 | C17orf51     | Homo sapiens chromosome 17 open reading frame 51 (C17orf51), mRNA [NM_001113434]                        |
| A_24_P59607    | 0,03321925   | down | -1,7336564 | C17orf51     | Homo sapiens chromosome 17 open reading frame 51 (C17orf51), mRNA [NM_001113434]                        |
| A_19_P00316405 | 0,017694099  | down | -1,9292026 | C17orf51     | Homo sapiens chromosome 17 open reading frame 51 (C17orf51), mRNA [NM_001113434]                        |
| A_33_P3295838  | 0,003848652  | down | -2,3658662 | C17orf53     | Homo sapiens chromosome 17 open reading frame 53 (C17orf53), transcript variant 2, mRNA [NM_001171251]  |
| A_23_P164100   | 0,036524523  | up   | 2,5161004  | C17orf64     | Homo sapiens chromosome 17 open reading frame 64 (C17orf64), mRNA [NM_181707]                           |
| A_24_P301547   | 0,013102852  | down | -1,5883107 | C17orf80     | Homo sapiens chromosome 17 open reading frame 80 (C17orf80), transcript variant 1, mRNA [NM_017941]     |
| A_33_P3410935  | 0,001054743  | down | -1,7327513 | C17orf89     | Homo sapiens chromosome 17 open reading frame 89 (C17orf89), mRNA [NM_001086521]                        |
| A_23_P50052    | 0,003982777  | down | -1,8659004 | C18orf12     | PREDICTED: Homo sapiens chromosome 18 open reading frame 12 (C18orf12), misc_RNA [XR_109479]            |
| A_33_P3417667  | 0,031383574  | down | -1,6995401 | C18orf15     | Homo sapiens cDNA FLJ31338 fis, clone MAMGL1000184. [AK055900]                                          |
| A_23_P345361   | 0,010653761  | up   | 2,0523012  | C18orf25     | Homo sapiens chromosome 18 open reading frame 25 (C18orf25), transcript variant 1, mRNA [NM_145055]     |
| A_33_P3266978  | 0,011262254  | up   | 1,5762713  | C18orf42     | Homo sapiens chromosome 18 open reading frame 42 (C18orf42), mRNA [NM_001145194]                        |
| A_21_P0009620  | 0,003890228  | down | -2,7433755 | C18orf61     | Homo sapiens uncharacterized LOC497259 (C18orf61), long non-coding RNA [NR_049896]                      |
| A_33_P3300680  | 0,00242119   | down | -1,5668111 | C19orf12     | Homo sapiens chromosome 19 open reading frame 12 (C19orf12), transcript variant 3, mRNA [NM_001256046]  |
| A_24_P373885   | 0,002294859  | down | -1,6359339 | C19orf25     | Homo sapiens chromosome 19 open reading frame 25 (C19orf25), mRNA [NM_152482]                           |
| A_23_P308632   | 0,025408313  | down | -1,6422756 | C19orf26     | Homo sapiens chromosome 19 open reading frame 26 (C19orf26), mRNA [NM_152769]                           |

|               |             |      |            |             |                                                                                                                    |
|---------------|-------------|------|------------|-------------|--------------------------------------------------------------------------------------------------------------------|
| A_33_P3411945 | 0,033334192 | down | -1,7053002 | C19orf38    | Homo sapiens chromosome 19 open reading frame 38 (C19orf38), mRNA [NM_001136482]                                   |
| A_23_P107801  | 0,001735886 | down | -1,9899907 | C19orf44    | Homo sapiens chromosome 19 open reading frame 44 (C19orf44), transcript variant 1, mRNA [NM_032207]                |
| A_33_P3389363 | 0,006787806 | down | -1,8771193 | C19orf54    | chromosome 19 open reading frame 54 [Source:HGNC Symbol;Acc:HGNC:24758] [ENST00000597507]                          |
| A_24_P247286  | 0,027553683 | up   | 2,1465638  | C19orf71    | Homo sapiens chromosome 19 open reading frame 71 (C19orf71), mRNA [NM_001135580]                                   |
| A_21_P0000177 | 0,015290594 | down | -1,6555092 | C19orf83    | chromosome 19 open reading frame 83 [Source:HGNC Symbol;Acc:HGNC:48331] [ENST00000591087]                          |
| A_33_P3395859 | 1,02E-05    | down | -2,3398092 | C19orf84    | Homo sapiens chromosome 19 open reading frame 84 (C19orf84), transcript variant 1, mRNA [NM_001193623]             |
| A_23_P67992   | 0,002809603 | up   | 1,5477301  | C1D         | Homo sapiens C1D nuclear receptor corepressor (C1D), transcript variant 1, mRNA [NM_006333]                        |
| A_33_P3250830 | 0,013743729 | up   | 2,24282    | C1orf110    | PREDICTED: Homo sapiens chromosome 1 open reading frame 110 (C1orf110), transcript variant X3, mRNA [XM_005245126] |
| A_33_P3280317 | 0,041153792 | up   | 1,7212596  | C1orf137    | Homo sapiens chromosome 1 open reading frame 137 (C1orf137), mRNA [NM_001013643]                                   |
| A_33_P3295091 | 0,003839824 | down | -5,1490974 | C1orf140    | Homo sapiens uncharacterized LOC400804 (C1orf140), long non-coding RNA [NR_024236]                                 |
| A_33_P3395562 | 0,009299512 | up   | 2,427006   | C1orf141    | Homo sapiens chromosome 1 open reading frame 141 (C1orf141), transcript variant 1, mRNA [NM_001276351]             |
| A_33_P3260193 | 0,007036821 | up   | 1,5297849  | C1orf141    | Homo sapiens chromosome 1 open reading frame 141 (C1orf141), transcript variant 2, mRNA [NM_001276352]             |
| A_23_P74668   | 0,002065316 | down | -2,011021  | C1orf158    | Homo sapiens chromosome 1 open reading frame 158 (C1orf158), mRNA [NM_152290]                                      |
| A_33_P3299081 | 4,04E-04    | up   | 2,6546507  | C1orf159    | chromosome 1 open reading frame 159 [Source:HGNC Symbol;Acc:HGNC:26062] [ENST00000379319]                          |
| A_23_P412562  | 0,002009431 | up   | 1,7276855  | C1orf162    | Homo sapiens chromosome 1 open reading frame 162 (C1orf162), transcript variant 1, mRNA [NM_174896]                |
| A_33_P3295278 | 0,005062784 | up   | 1,9322988  | C1orf185    | Homo sapiens chromosome 1 open reading frame 185 (C1orf185), mRNA [NM_001136508]                                   |
| A_33_P3359724 | 0,015535068 | down | -1,8766551 | C1orf194    | chromosome 1 open reading frame 194 [Source:HGNC Symbol;Acc:HGNC:32331] [ENST00000369942]                          |
| A_23_P321377  | 0,017205432 | up   | 1,9437603  | C1orf216    | Homo sapiens chromosome 1 open reading frame 216 (C1orf216), mRNA [NM_152374]                                      |
| A_32_P453321  | 0,030099818 | down | -1,5776931 | C1orf228    | Homo sapiens chromosome 1 open reading frame 228 (C1orf228), mRNA [NM_001145636]                                   |
| A_24_P234116  | 1,09E-05    | up   | 2,1553545  | C1orf56     | Homo sapiens chromosome 1 open reading frame 56 (C1orf56), mRNA [NM_017860]                                        |
| A_21_P0014079 | 4,27E-04    | down | -3,8189242 | C1orf61     | chromosome 1 open reading frame 61 [Source:HGNC Symbol;Acc:HGNC:30780] [ENST00000476966]                           |
| A_23_P376172  | 3,23E-05    | down | -2,8939626 | C1orf64     | Homo sapiens chromosome 1 open reading frame 64 (C1orf64), mRNA [NM_178840]                                        |
| A_33_P3359354 | 0,00227733  | down | -1,687056  | C1orf86     | Homo sapiens chromosome 1 open reading frame 86 (C1orf86), transcript variant 7, mRNA [NM_001282671]               |
| A_24_P49214   | 0,014438279 | up   | 1,504375   | C1orf86     | Homo sapiens chromosome 1 open reading frame 86 (C1orf86), transcript variant 7, mRNA [NM_001282671]               |
| A_21_P0001087 | 0,015655853 | up   | 1,6109104  | C1orf86     | chromosome 1 open reading frame 86 [Source:HGNC Symbol;Acc:HGNC:26428] [ENST00000420964]                           |
| A_23_P50928   | 0,0209881   | up   | 2,9088085  | C1QL2       | Homo sapiens complement component 1, q subcomponent-like 2 (C1QL2), mRNA [NM_182528]                               |
| A_23_P259292  | 0,011675671 | down | -1,6602038 | C1QTNF5     | Homo sapiens C1q and tumor necrosis factor related protein 5 (C1QTNF5), transcript variant 1, mRNA [NM_015645]     |
| A_23_P400505  | 0,037478536 | up   | 1,8946884  | C1QTNF9     | Homo sapiens C1q and tumor necrosis factor related protein 9 (C1QTNF9), transcript variant 2, mRNA [NM_178540]     |
| A_33_P3230478 | 0,002951325 | down | -2,517501  | C1S         | Homo sapiens complement component 1, s subcomponent (C1S), transcript variant 1, mRNA [NM_201442]                  |
| A_33_P3399875 | 0,002426516 | down | -2,303656  | C20orf144   | Homo sapiens chromosome 20 open reading frame 144 (C20orf144), mRNA [NM_080825]                                    |
| A_23_P314835  | 9,88E-05    | down | -3,350432  | C20orf85    | Homo sapiens chromosome 20 open reading frame 85 (C20orf85), mRNA [NM_178456]                                      |
| A_23_P132139  | 5,35E-05    | down | -3,4410741 | C21orf58    | Homo sapiens chromosome 21 open reading frame 58 (C21orf58), transcript variant 2, mRNA [NM_001286462]             |
| A_23_P166431  | 0,027236141 | up   | 2,2669718  | C22orf24    | Homo sapiens chromosome 22 open reading frame 24 (C22orf24), transcript variant 1, mRNA [NM_001302819]             |
| A_24_P940149  | 6,92E-05    | up   | 1,9645551  | C2CD2       | Homo sapiens C2 calcium-dependent domain containing 2 (C2CD2), transcript variant 1, mRNA [NM_015500]              |
| A_33_P3215412 | 0,007303437 | up   | 1,6405735  | C2CD4C      | Homo sapiens C2 calcium-dependent domain containing 4C (C2CD4C), mRNA [NM_001136263]                               |
| A_21_P0000205 | 3,79E-04    | down | -3,7655904 | C2orf48     | Homo sapiens chromosome 2 open reading frame 48 (C2orf48), mRNA [NM_182626]                                        |
| A_24_P883629  | 4,42E-04    | up   | 2,2073674  | C2orf49     | Homo sapiens chromosome 2 open reading frame 49 (C2orf49), transcript variant 1, mRNA [NM_024093]                  |
| A_33_P3398998 | 5,66E-04    | down | -2,6267378 | C2orf50     | Homo sapiens chromosome 2 open reading frame 50 (C2orf50), mRNA [NM_182500]                                        |
| A_24_P297526  | 0,026571114 | up   | 1,5326529  | C2orf50     | chromosome 2 open reading frame 50 [Source:HGNC Symbol;Acc:HGNC:26324] [ENST00000381585]                           |
| A_23_P60990   | 0,027017508 | up   | 2,402772   | C2orf54     | Homo sapiens chromosome 2 open reading frame 54 (C2orf54), transcript variant 2, mRNA [NM_024861]                  |
| A_33_P3265714 | 3,98E-05    | down | -7,859415  | C2orf61     | Homo sapiens chromosome 2 open reading frame 61 (C2orf61), transcript variant 2, mRNA [NM_173649]                  |
| A_24_P413941  | 0,003602079 | up   | 1,546933   | C2orf69     | Homo sapiens chromosome 2 open reading frame 69 (C2orf69), mRNA [NM_153689]                                        |
| A_33_P3416682 | 0,011818631 | down | -1,5430188 | C2orf91     | Homo sapiens chromosome 2 open reading frame 91 (C2orf91), mRNA [NM_001242815]                                     |
| A_23_P2431    | 0,001250125 | down | -2,1110663 | C3AR1       | Homo sapiens complement component 3a receptor 1 (C3AR1), mRNA [NM_004054]                                          |
| A_23_P395585  | 7,72E-04    | down | -2,2261655 | C3orf22     | chromosome 3 open reading frame 22 [Source:HGNC Symbol;Acc:HGNC:28534] [ENST00000318225]                           |
| A_32_P72492   | 0,003761428 | up   | 1,5031688  | C3orf30     | Homo sapiens chromosome 3 open reading frame 30 (C3orf30), mRNA [NM_152539]                                        |
| A_23_P301476  | 0,0331316   | up   | 1,585251   | C3orf33     | Homo sapiens chromosome 3 open reading frame 33 (C3orf33), mRNA [NM_173657]                                        |
| A_32_P430695  | 0,013790251 | up   | 1,5842432  | C3orf35     | Homo sapiens chromosome 3 open reading frame 35 (C3orf35), transcript variant B, mRNA [NM_178339]                  |
| A_33_P3238548 | 0,003659779 | up   | 2,674651   | C3orf36     | Homo sapiens chromosome 3 open reading frame 36 (C3orf36), mRNA [NM_025041]                                        |
| A_33_P3237507 | 0,030876918 | up   | 2,255131   | C4orf50     | chromosome 4 open reading frame 50 [Source:HGNC Symbol;Acc:HGNC:33766] [ENST00000531445]                           |
| A_33_P3223002 | 0,013509703 | up   | 1,5923036  | C5AR2       | Homo sapiens complement component 5a receptor 2 (C5AR2), transcript variant 1, mRNA [NM_001271749]                 |
| A_23_P403081  | 0,001000011 | up   | 3,1656044  | C5orf34     | Homo sapiens chromosome 5 open reading frame 34 (C5orf34), mRNA [NM_198566]                                        |
| A_33_P3262351 | 0,009470932 | down | -3,2358284 | C5orf49     | Homo sapiens chromosome 5 open reading frame 49 (C5orf49), mRNA [NM_001089584]                                     |
| A_21_P0000174 | 1,50E-04    | down | -5,5968323 | C5orf56     | Homo sapiens cDNA, FLJ99232. [AK309191]                                                                            |
| A_33_P3296198 | 0,002799848 | down | -1,5142679 | C5orf63     | Homo sapiens chromosome 5 open reading frame 63 (C5orf63), transcript variant 1, mRNA [NM_001164479]               |
| A_33_P3660204 | 0,017682819 | down | -1,9066949 | C5orf66-AS2 | Homo sapiens C5orf66 antisense RNA 2 (C5orf66-AS2), long non-coding RNA [NR_037895]                                |
| A_33_P3404739 | 0,01775147  | up   | 1,8065815  | C6orf141    | PREDICTED: Homo sapiens chromosome 6 open reading frame 141 (C6orf141), transcript variant X2, mRNA [XM_005248851] |
| A_33_P3422374 | 0,007171255 | up   | 1,631184   | C6orf163    | Homo sapiens chromosome 6 open reading frame 163 (C6orf163), mRNA [NM_001010868]                                   |
| A_23_P308042  | 0,006316056 | up   | 1,618673   | C6orf195    | Homo sapiens chromosome 6 open reading frame 195 (C6orf195), mRNA [NM_152554]                                      |
| A_23_P81934   | 0,037040733 | up   | 1,6466604  | C6orf25     | Homo sapiens chromosome 6 open reading frame 25 (C6orf25), transcript variant 1, mRNA [NM_025260]                  |
| A_23_P93602   | 0,04388638  | down | -1,7513932 | C6orf58     | Homo sapiens chromosome 6 open reading frame 58 (C6orf58), mRNA [NM_001010905]                                     |

|                |             |      |            |             |                                                                                                                                |
|----------------|-------------|------|------------|-------------|--------------------------------------------------------------------------------------------------------------------------------|
| A_21_P0014171  | 0,009925813 | down | -1,7401906 | C6orf62     | PREDICTED: Homo sapiens chromosome 6 open reading frame 62 (C6orf62), transcript variant X1, mRNA [XM_005249433]               |
| A_23_P213857   | 1,46E-04    | down | -3,2527456 | C7          | Homo sapiens complement component 7 (C7), mRNA [NM_000587]                                                                     |
| A_33_P3226710  | 0,00100096  | down | -1,7926316 | C7orf13     | Homo sapiens chromosome 7 open reading frame 13 (C7orf13), long non-coding RNA [NR_026865]                                     |
| A_23_P157316   | 0,008317599 | down | -1,8962457 | C7orf34     | Homo sapiens chromosome 7 open reading frame 34 (C7orf34), mRNA [NM_178829]                                                    |
| A_33_P3405349  | 0,002907356 | down | -2,0664725 | C7orf43     | chromosome 7 open reading frame 43 [Source:HGNC Symbol;Acc:HGNC:25604] [ENST00000448720]                                       |
| A_23_P93704    | 0,009477842 | down | -1,9422268 | C7orf61     | Homo sapiens chromosome 7 open reading frame 61 (C7orf61), mRNA [NM_001004323]                                                 |
| A_33_P3401397  | 1,19E-04    | down | -2,5869439 | C7orf65     | Homo sapiens chromosome 7 open reading frame 65 (C7orf65), mRNA [NM_001123065]                                                 |
| A_33_P3401003  | 0,005568145 | up   | 2,0440712  | C7orf71     | Homo sapiens chromosome 7 open reading frame 71 (C7orf71), transcript variant 1, mRNA [NM_001145531]                           |
| A_33_P3222822  | 0,006868362 | up   | 1,5260484  | C7orf76     | Homo sapiens chromosome 7 open reading frame 76 (C7orf76), transcript variant 1, mRNA [NM_001201450]                           |
| A_23_P46639    | 0,006902554 | down | -2,498289  | C8A         | Homo sapiens complement component 8, alpha polypeptide (C8A), mRNA [NM_000562]                                                 |
| A_33_P3319006  | 4,48E-04    | down | -1,7982696 | C8G         | Homo sapiens complement component 8, gamma polypeptide (C8G), mRNA [NM_000606]                                                 |
| A_21_P0000720  | 0,049018677 | up   | 2,0051517  | C8orf37-AS1 | Homo sapiens C8orf37 antisense RNA 1 (C8orf37-AS1), transcript variant 5, long non-coding RNA [NR_038205]                      |
| A_33_P3410849  | 2,17E-05    | down | -2,0052426 | C8orf58     | Homo sapiens chromosome 8 open reading frame 58 (C8orf58), transcript variant 1, mRNA [NM_001013842]                           |
| A_33_P3416513  | 2,53E-04    | down | -3,1108584 | C8orf74     | Homo sapiens chromosome 8 open reading frame 74 (C8orf74), mRNA [NM_001040032]                                                 |
| A_33_P3287997  | 3,08E-05    | down | -3,2246013 | C9orf106    | Homo sapiens chromosome 9 open reading frame 106 (C9orf106), mRNA [NM_0010102715]                                              |
| A_23_P312646   | 0,001104734 | up   | 1,5398448  | C9orf142    | Homo sapiens chromosome 9 open reading frame 142 (C9orf142), mRNA [NM_183241]                                                  |
| A_24_P212860   | 0,00370285  | down | -1,775879  | C9orf156    | Homo sapiens chromosome 9 open reading frame 156 (C9orf156), mRNA [NM_016481]                                                  |
| A_23_P331092   | 0,003785853 | down | -1,6645281 | C9orf163    | Homo sapiens chromosome 9 open reading frame 163 (C9orf163), mRNA [NM_152571]                                                  |
| A_33_P3354847  | 0,005497535 | up   | 1,5073663  | C9orf171    | Homo sapiens chromosome 9 open reading frame 171 (C9orf171), transcript variant 1, mRNA [NM_207417]                            |
| A_33_P3359223  | 0,011334027 | down | -1,7157632 | C9orf173    | Homo sapiens chromosome 9 open reading frame 173 (C9orf173), transcript variant 1, mRNA [NM_001256699]                         |
| A_24_P303874   | 0,001281957 | down | -2,0948942 | C9orf62     | Homo sapiens chromosome 9 open reading frame 62 (C9orf62), mRNA [NM_173520]                                                    |
| A_33_P3353662  | 0,005055436 | up   | 1,8618675  | C9orf66     | Homo sapiens chromosome 9 open reading frame 66 (C9orf66), mRNA [NM_152569]                                                    |
| A_33_P3267745  | 0,001190263 | down | -2,0081553 | C9orf69     | Homo sapiens chromosome 9 open reading frame 69 (C9orf69), transcript variant 2, mRNA [NM_001256526]                           |
| A_32_P341615   | 0,004157216 | up   | 3,114894   | C9orf84     | Homo sapiens chromosome 9 open reading frame 84 (C9orf84), transcript variant 1, mRNA [NM_173521]                              |
| A_23_P4096     | 0,013583898 | down | -1,6254097 | CA4         | Homo sapiens carbonic anhydrase IV (CA4), mRNA [NM_000717]                                                                     |
| A_19_P00320384 | 0,001966541 | down | -1,973875  | CA5BP1      | carbonic anhydrase VB pseudogene 1 [Source:HGNC Symbol;Acc:HGNC:29544] [ENST00000380336]                                       |
| A_33_P3334398  | 0,011373877 | down | -1,6157086 | CA6         | Homo sapiens carbonic anhydrase VI (CA6), transcript variant 2, mRNA [NM_001270500]                                            |
| A_23_P83838    | 0,00373772  | down | -2,4077115 | CA8         | Homo sapiens carbonic anhydrase VIII (CA8), mRNA [NM_004056]                                                                   |
| A_33_P3213685  | 0,022332134 | down | -1,758655  | CAB39L      | Homo sapiens calcium binding protein 39-like (CAB39L), transcript variant 4, mRNA [NM_001287339]                               |
| A_33_P3302354  | 4,99E-04    | up   | 2,092675   | CABIN1      | Homo sapiens calcineurin binding protein 1 (CABIN1), transcript variant 1, mRNA [NM_001199281]                                 |
| A_24_P241057   | 0,045949005 | up   | 1,9105861  | CABP2       | Homo sapiens calcium binding protein 2 (CABP2), mRNA [NM_016366]                                                               |
| A_23_P308021   | 0,00464069  | down | -1,8930149 | CABP4       | Homo sapiens calcium binding protein 4 (CABP4), transcript variant 1, mRNA [NM_145200]                                         |
| A_23_P21747    | 0,010721117 | down | -1,5862623 | CABP5       | Homo sapiens calcium binding protein 5 (CABP5), mRNA [NM_019855]                                                               |
| A_33_P3348061  | 0,006846719 | up   | 2,160392   | CABP7       | Homo sapiens calcium binding protein 7 (CABP7), mRNA [NM_182527]                                                               |
| A_33_P3280106  | 0,029164301 | down | -2,0901303 | CACNA1B     | Homo sapiens calcium channel, voltage-dependent, N type, alpha 1B subunit (CACNA1B), transcript variant 2, mRNA [NM_001243812] |
| A_32_P153773   | 1,44E-05    | down | -3,7969358 | CACNA1B     | Homo sapiens calcium channel, voltage-dependent, N type, alpha 1B subunit (CACNA1B), transcript variant 1, mRNA [NM_000718]    |
| A_23_P373031   | 8,25E-06    | down | -2,7767072 | CACNA1C     | Homo sapiens calcium channel, voltage-dependent, L type, alpha 1C subunit (CACNA1C), transcript variant 18, mRNA [NM_000719]   |
| A_33_P3350566  | 3,73E-04    | down | -2,3052325 | CACNA1I     | Homo sapiens calcium channel, voltage-dependent, T type, alpha 1I subunit (CACNA1I), transcript variant 1, mRNA [NM_021096]    |
| A_33_P3373259  | 0,006270819 | up   | 3,3288553  | CACNA2D3    | Homo sapiens calcium channel, voltage-dependent, alpha 2/delta subunit 3 (CACNA2D3), mRNA [NM_018398]                          |
| A_24_P402825   | 0,001253673 | up   | 1,8601954  | CACNA2D3    | Homo sapiens calcium channel, voltage-dependent, alpha 2/delta subunit 3 (CACNA2D3), mRNA [NM_018398]                          |
| A_24_P91165    | 0,009269845 | down | -1,9518722 | CACNB1      | Homo sapiens calcium channel, voltage-dependent, beta 1 subunit (CACNB1), transcript variant 3, mRNA [NM_199248]               |
| A_33_P3221989  | 0,013163974 | up   | 2,7490482  | CACNB4      | Homo sapiens calcium channel, voltage-dependent, beta 4 subunit (CACNB4), transcript variant 1, mRNA [NM_001005747]            |
| A_23_P66180    | 5,42E-04    | down | -4,5994687 | CACNG3      | Homo sapiens calcium channel, voltage-dependent, gamma subunit 3 (CACNG3), mRNA [NM_006539]                                    |
| A_24_P70303    | 7,39E-04    | down | -2,302264  | CACNG4      | Homo sapiens calcium channel, voltage-dependent, gamma subunit 4 (CACNG4), mRNA [NM_014405]                                    |
| A_23_P4782     | 0,00147378  | down | -2,0308728 | CACNG7      | Homo sapiens calcium channel, voltage-dependent, gamma subunit 7 (CACNG7), mRNA [NM_031896]                                    |
| A_33_P3356290  | 0,042340543 | up   | 2,519178   | CADPS       | Homo sapiens Ca <sup>++</sup> -dependent secretion activator (CADPS), transcript variant 3, mRNA [NM_183393]                   |
| A_33_P3354001  | 0,048061475 | down | -2,105878  | CADPS2      | Homo sapiens Ca <sup>++</sup> -dependent secretion activator 2 (CADPS2), transcript variant 3, mRNA [NM_001167940]             |
| A_23_P98995    | 3,51E-04    | up   | 2,2245557  | CALCOCO1    | Homo sapiens calcium binding and coiled-coil domain 1 (CALCOCO1), transcript variant 1, mRNA [NM_020898]                       |
| A_33_P3306103  | 5,78E-04    | down | -3,8219736 | CALCRL      | Homo sapiens calcitonin receptor-like (CALCRL), transcript variant 1, mRNA [NM_005795]                                         |
| A_33_P3261957  | 0,005408529 | down | -2,4857736 | CALCRL      | Homo sapiens calcitonin receptor-like (CALCRL), transcript variant 1, mRNA [NM_005795]                                         |
| A_33_P3306110  | 0,03281209  | down | -2,0890841 | CALCRL      | Homo sapiens calcitonin receptor-like (CALCRL), transcript variant 1, mRNA [NM_005795]                                         |
| A_23_P812268   | 1,33E-07    | down | -4,322479  | CALHM1      | Homo sapiens calcium homeostasis modulator 1 (CALHM1), mRNA [NM_001001412]                                                     |
| A_24_P313186   | 0,001296904 | up   | 2,2438834  | CALM1       | Homo sapiens calmodulin 1 (phosphorylase kinase, delta) (CALM1), mRNA [NM_006888]                                              |
| A_23_P393080   | 0,010239303 | down | -1,542385  | CALML3      | Homo sapiens calmodulin-like 3 (CALML3), mRNA [NM_005185]                                                                      |
| A_33_P3397935  | 0,031458963 | down | -1,8161145 | CALML3-AS1  | Homo sapiens CALML3 antisense RNA 1 (CALML3-AS1), transcript variant 1, long non-coding RNA [NR_120496]                        |
| A_23_P129188   | 0,004761655 | up   | 1,5682592  | CALML4      | Homo sapiens calmodulin-like 4 (CALML4), transcript variant 1, mRNA [NM_033429]                                                |
| A_33_P3292854  | 0,038584128 | down | -1,6172713 | CALR        | Homo sapiens calreticulin (CALR), mRNA [NM_004343]                                                                             |
| A_33_P3294149  | 0,008315786 | down | -2,1864622 | CALY        | calcyon neuron-specific vesicular protein [Source:HGNC Symbol;Acc:HGNC:17938] [ENST00000467611]                                |
| A_33_P3294153  | 0,003345588 | down | -1,8922855 | CALY        | calcyon neuron-specific vesicular protein [Source:HGNC Symbol;Acc:HGNC:17938] [ENST00000368555]                                |
| A_33_P3318646  | 1,64E-05    | down | -4,245599  | CALY        | Homo sapiens calcyon neuron-specific vesicular protein (CALY), mRNA [NM_015722]                                                |
| A_24_P141332   | 0,006458008 | up   | 1,6508731  | CAMK2G      | Homo sapiens calcium/calmodulin-dependent protein kinase II gamma (CAMK2G), transcript variant 1, mRNA [NM_172171]             |

|                |                  |                         |                                                                                                                                    |
|----------------|------------------|-------------------------|------------------------------------------------------------------------------------------------------------------------------------|
| A_23_P11800    | 0,003929476 up   | 1,9782262 CAMK2N1       | Homo sapiens calcium/calmodulin-dependent protein kinase II inhibitor 1 (CAMK2N1), mRNA [NM_018584]                                |
| A_33_P3244283  | 0,010771492 down | -1,8027769 CAMK2N2      | Homo sapiens calcium/calmodulin-dependent protein kinase II inhibitor 2 (CAMK2N2), mRNA [NM_033259]                                |
| A_23_P29680    | 0,002454664 up   | 1,7136111 CAMKV         | Homo sapiens CaM kinase-like vesicle-associated (CAMKV), mRNA [NM_024046]                                                          |
| A_23_P253791   | 0,019852001 down | -3,2464259 CAMP         | Homo sapiens cathelicidin antimicrobial peptide (CAMP), mRNA [NM_004345]                                                           |
| A_24_P175460   | 0,000971636 up   | 1,6087166 CAMSAP1       | Homo sapiens calmodulin regulated spectrin-associated protein 1 (CAMSAP1), mRNA [NM_015447]                                        |
| A_24_P47681    | 2,43E-04 down    | -3,8831863 CAND1        | cullin-associated and neddylation-dissociated 1 [Source:HGNC Symbol;Acc:HGNC:30688] [ENST00000545606]                              |
| A_33_P3216938  | 0,032763 down    | -1,9497224 CAND1.11     | Homo sapiens uncharacterized LOC100130460 (CAND1.11), long non-coding RNA [NR_103765]                                              |
| A_24_P116669   | 0,025507515 down | -1,50759 CANT1          | Homo sapiens calcium activated nucleotidase 1 (CANT1), transcript variant 1, mRNA [NM_138793]                                      |
| A_33_P3325131  | 0,027410096 down | -1,720297 CANX          | Homo sapiens calnexin (CANX), transcript variant 1, mRNA [NM_001746]                                                               |
| A_33_P3739260  | 0,012642053 down | -1,7218921 CAP2         | Homo sapiens CAP, adenylate cyclase-associated protein, 2 (yeast) (CAP2), mRNA [NM_006366]                                         |
| A_32_P167076   | 0,001388048 up   | 2,767674 CAPN14         | Homo sapiens calpain 14 (CAPN14), mRNA [NM_001145122]                                                                              |
| A_24_P282210   | 0,003317926 up   | 1,6330211 CAPN15        | Homo sapiens calpain 15 (CAPN15), mRNA [NM_005632]                                                                                 |
| A_23_P23924    | 0,014474309 up   | 1,5532141 CAPN2         | Homo sapiens calpain 2, (mII) large subunit (CAPN2), transcript variant 1, mRNA [NM_001748]                                        |
| A_33_P3342752  | 6,61E-04 up      | 3,0172226 CAPN8         | calpain 8 [Source:HGNC Symbol;Acc:HGNC:1485] [ENST00000366873]                                                                     |
| A_24_P56281    | 0,030871319 up   | 2,0110452 CAPRN2        | Homo sapiens caprin family member 2 (CAPRN2), transcript variant 1, mRNA [NM_001002259]                                            |
| A_32_P209208   | 0,01743113 down  | -2,6199665 CAPS2        | Homo sapiens calcyphosine 2 (CAPS2), transcript variant 1, mRNA [NM_032606]                                                        |
| A_23_P133536   | 0,010121712 down | -2,2008352 CAPSL        | Homo sapiens calcyphosine-like (CAPSL), transcript variant 1, mRNA [NM_144647]                                                     |
| A_23_P87727    | 9,79E-04 up      | 2,1819143 CAPZA3        | Homo sapiens capping protein (actin filament) muscle Z-line, alpha 3 (CAPZA3), mRNA [NM_033328]                                    |
| A_33_P3235561  | 0,045450002 up   | 1,7201736 CAPZB         | Homo sapiens capping protein (actin filament) muscle Z-line, beta (CAPZB), transcript variant 3, mRNA [NM_001206541]               |
| A_33_P3302687  | 0,004589391 down | -1,9119489 CARKD        | Homo sapiens carbohydrate kinase domain containing (CARKD), transcript variant 2, mRNA [NM_001242881]                              |
| A_23_P95231    | 6,82E-05 up      | 3,9417884 CASC1         | Homo sapiens cancer susceptibility candidate 1 (CASC1), transcript variant 1, mRNA [NM_018272]                                     |
| A_33_P3538104  | 0,009089293 down | -3,6091278 CASC22       | cancer susceptibility candidate 22 (non-protein coding) [Source:HGNC Symbol;Acc:HGNC:50627] [ENST00000569713]                      |
| A_21_P0009099  | 4,61E-04 up      | 2,8797824 CASC22        | PREDICTED: Homo sapiens uncharacterized LOC283854 (LOC283854), misc_RNA [XR_243451]                                                |
| A_21_P0013146  | 0,00601698 up    | 1,6315575 CASC6         | Homo sapiens cancer susceptibility candidate 6 (non-protein coding) (CASC6), long non-coding RNA [NR_104154]                       |
| A_19_P00316700 | 0,004191788 up   | 1,529514 CASC8          | Homo sapiens cancer susceptibility candidate 8 (non-protein coding) (CASC8), transcript variant 2, long non-coding RNA [NR_024393] |
| A_19_P00316699 | 0,008812192 up   | 1,6398703 CASC8         | Homo sapiens cancer susceptibility candidate 8 (non-protein coding) (CASC8), transcript variant 2, long non-coding RNA [NR_024393] |
| A_24_P69379    | 0,007251092 up   | 1,8421323 CASD1         | Homo sapiens CAS1 domain containing 1 (CASD1), mRNA [NM_022900]                                                                    |
| A_33_P3349552  | 0,012569573 down | -1,7314166 CASKIN1      | Homo sapiens CASK interacting protein 1 (CASKIN1), mRNA [NM_020764]                                                                |
| A_24_P219378   | 1,33E-04 up      | 1,7895368 CASKIN1       | Homo sapiens CASK interacting protein 1 (CASKIN1), mRNA [NM_020764]                                                                |
| A_24_P3045     | 0,03393119 down  | -1,5223879 CASP10       | Homo sapiens caspase 10, apoptosis-related cysteine peptidase (CASP10), transcript variant 2, mRNA [NM_032974]                     |
| A_23_P13102    | 2,76E-04 down    | -3,3307505 CASP12       | Homo sapiens caspase 12 (gene/pseudogene) (CASP12), transcript variant 1, mRNA [NM_001191016]                                      |
| A_33_P3308387  | 0,014873353 down | -1,6307902 CASP2        | Homo sapiens caspase 2, apoptosis-related cysteine peptidase (CASP2), transcript variant 1, mRNA [NM_032982]                       |
| A_33_P3278118  | 0,008159657 down | -1,5568461 CASP3        | Homo sapiens caspase 3, apoptosis-related cysteine peptidase (CASP3), transcript variant alpha, mRNA [NM_004346]                   |
| A_33_P3382959  | 4,07E-04 up      | 1,7423341 CASP8AP2      | Homo sapiens caspase 8 associated protein 2 (CASP8AP2), transcript variant 1, mRNA [NM_012115]                                     |
| A_33_P3338300  | 0,01847792 up    | 1,7063329 CASZ1         | Homo sapiens castor zinc finger 1 (CASZ1), transcript variant 1, mRNA [NM_001079843]                                               |
| A_33_P3335257  | 0,015389154 down | -1,5475271 CATSPERD     | Homo sapiens catsper channel auxiliary subunit delta (CATSPERD), mRNA [NM_152784]                                                  |
| A_33_P3335262  | 7,41E-05 down    | -2,245983 CATSPERD      | Homo sapiens cDNA FLJ46209 fis, clone TEST4011616. [AK128088]                                                                      |
| A_24_P925040   | 0,00365774 down  | -2,072815 CAV2          | Homo sapiens caveolin 2 (CAV2), transcript variant 1, mRNA [NM_001233]                                                             |
| A_23_P212715   | 0,013763597 up   | 1,5976015 CBLB          | Homo sapiens Cbl proto-oncogene B, E3 ubiquitin protein ligase (CBLB), mRNA [NM_170662]                                            |
| A_33_P3385516  | 0,035538558 down | -2,1539981 CBLN4        | Homo sapiens cerebellin 4 precursor (CBLN4), mRNA [NM_080617]                                                                      |
| A_24_P298174   | 0,00341654 down  | -1,5970433 CBX1         | Homo sapiens chromobox homolog 1 (CBX1), transcript variant 1, mRNA [NM_006807]                                                    |
| A_33_P3423954  | 3,93E-05 down    | -2,3307319 CBX2         | Homo sapiens chromobox homolog 2 (CBX2), transcript variant 2, mRNA [NM_032647]                                                    |
| A_33_P3270485  | 0,00533068 up    | 1,8114058 CBX6          | chromobox homolog 6 [Source:HGNC Symbol;Acc:HGNC:1556] [ENST00000407418]                                                           |
| A_33_P3343845  | 0,019814452 down | -1,8198328 CBX7         | Homo sapiens chromobox homolog 7 (CBX7), mRNA [NM_175709]                                                                          |
| A_23_P348383   | 0,04713254 down  | -1,9929665 CC2D2A       | Homo sapiens coiled-coil and C2 domain containing 2A (CC2D2A), transcript variant 1, mRNA [NM_001080522]                           |
| A_33_P3308686  | 0,03714166 down  | -1,8379667 CC2D2A       | Homo sapiens coiled-coil and C2 domain containing 2A (CC2D2A), transcript variant 2, mRNA [NM_020785]                              |
| A_33_P3347343  | 4,37E-04 down    | -2,2603095 CCDC102B     | Homo sapiens coiled-coil domain containing 102B (CCDC102B), transcript variant 1, mRNA [NM_001093729]                              |
| A_23_P26928    | 0,015572618 down | -1,9606558 CCDC103      | family with sequence similarity 187, member A [Source:HGNC Symbol;Acc:HGNC:35153] [ENST00000331733]                                |
| A_33_P3309741  | 0,010708613 down | -2,4800415 CCDC108      | Homo sapiens coiled-coil domain containing 108 (CCDC108), transcript variant 3, mRNA [NM_001278295]                                |
| A_23_P383325   | 0,002781586 up   | 1,5832578 CCDC110       | Homo sapiens coiled-coil domain containing 110 (CCDC110), transcript variant 1, mRNA [NM_152775]                                   |
| A_23_P342108   | 0,023967449 up   | 1,7094778 CCDC116       | Homo sapiens coiled-coil domain containing 116 (CCDC116), mRNA [NM_152612]                                                         |
| A_23_P432034   | 0,002155626 up   | 1,6987933 CCDC117       | Homo sapiens coiled-coil domain containing 117 (CCDC117), transcript variant 1, mRNA [NM_173510]                                   |
| A_23_P73540    | 0,004863574 up   | 1,5290366 CCDC120       | Homo sapiens coiled-coil domain containing 120 (CCDC120), transcript variant 3, mRNA [NM_033626]                                   |
| A_33_P3339593  | 0,026075276 down | -2,056184 CCDC134       | Homo sapiens coiled-coil domain containing 134 (CCDC134), mRNA [NM_024821]                                                         |
| A_23_P311144   | 0,043209735 up   | 1,637733 CCDC138        | Homo sapiens coiled-coil domain containing 138 (CCDC138), transcript variant 1, mRNA [NM_144978]                                   |
| A_33_P3348884  | 0,004441567 down | -2,8710835 CCDC141      | Homo sapiens coiled-coil domain containing 141 (CCDC141), mRNA [NM_173648]                                                         |
| A_33_P3350753  | 0,00642123 up    | 1,7318728 CCDC144A      | Homo sapiens coiled-coil domain containing 144A (CCDC144A), transcript variant 1, mRNA [NM_014695]                                 |
| A_33_P3472460  | 0,021069707 up   | 1,7286515 CCDC144NL-AS1 | Homo sapiens CCDC144NL antisense RNA 1 (CCDC144NL-AS1), long non-coding RNA [NR_104185]                                            |
| A_21_P0006788  | 0,03376422 up    | 2,3587623 CCDC147-AS1   | Homo sapiens CCDC147 antisense RNA 1 (head to head) (CCDC147-AS1), long non-coding RNA [NR_108036]                                 |
| A_33_P3608185  | 0,026017535 up   | 2,391328 CCDC148-AS1    | Homo sapiens CCDC148 antisense RNA 1 (CCDC148-AS1), long non-coding RNA [NR_038850]                                                |
| A_33_P3345294  | 0,00559675 down  | -2,1172876 CCDC162P     | coiled-coil domain containing 162, pseudogene [Source:HGNC Symbol;Acc:HGNC:21565] [ENST00000368966]                                |

|                |             |      |            |         |                                                                                                               |
|----------------|-------------|------|------------|---------|---------------------------------------------------------------------------------------------------------------|
| A_24_P937790   | 0,001516081 | down | -3,460304  | CCDC166 | Homo sapiens coiled-coil domain containing 166 (CCDC166), mRNA [NM_001162914]                                 |
| A_33_P3260100  | 0,002700094 | down | -1,5527667 | CCDC167 | Homo sapiens coiled-coil domain containing 167 (CCDC167), mRNA [NM_138493]                                    |
| A_33_P3307008  | 0,001274365 | down | -2,9032313 | CCDC168 | Homo sapiens coiled-coil domain containing 168 (CCDC168), mRNA [NM_001146197]                                 |
| A_33_P3351686  | 0,02654928  | up   | 1,656789   | CCDC17  | Homo sapiens coiled-coil domain containing 17 (CCDC17), transcript variant 1, mRNA [NM_001114938]             |
| A_19_P00321342 | 0,001306799 | down | -1,7376709 | CCDC171 | coiled-coil domain containing 171 [Source:HGNC Symbol;Acc:HGNC:29828] [ENST00000478913]                       |
| A_24_P195081   | 0,036035486 | down | -2,2094705 | CCDC171 | Homo sapiens coiled-coil domain containing 171 (CCDC171), mRNA [NM_173550]                                    |
| A_32_P395879   | 0,041576877 | down | -2,6437542 | CCDC171 | Homo sapiens coiled-coil domain containing 171 (CCDC171), mRNA [NM_173550]                                    |
| A_19_P00322813 | 3,38E-04    | down | -2,3783627 | CCDC171 | coiled-coil domain containing 171 [Source:HGNC Symbol;Acc:HGNC:29828] [ENST00000478913]                       |
| A_33_P3409337  | 0,026217945 | down | -2,1595662 | CCDC176 | Homo sapiens coiled-coil domain containing 176 (CCDC176), mRNA [NM_025057]                                    |
| A_24_P232790   | 0,001236759 | down | -2,334553  | CCDC177 | Homo sapiens coiled-coil domain containing 177 (CCDC177), mRNA [NM_001271507]                                 |
| A_33_P3402838  | 0,029053606 | up   | 1,6959014  | CCDC177 | Homo sapiens coiled-coil domain containing 177 (CCDC177), mRNA [NM_001271507]                                 |
| A_33_P3246623  | 0,037874065 | down | -1,7895004 | CCDC18  | Homo sapiens coiled-coil domain containing 18 (CCDC18), mRNA [NM_206886]                                      |
| A_23_P468      | 0,006259782 | down | -1,7990108 | CCDC181 | Homo sapiens coiled-coil domain containing 181 (CCDC181), transcript variant 2, mRNA [NM_021179]              |
| A_24_P68031    | 0,004809663 | up   | 1,86876    | CCDC186 | coiled-coil domain containing 186 [Source:HGNC Symbol;Acc:HGNC:24349] [ENST00000369285]                       |
| A_23_P381478   | 0,037384126 | up   | 1,9621594  | CCDC27  | Homo sapiens coiled-coil domain containing 27 (CCDC27), mRNA [NM_152492]                                      |
| A_33_P3271725  | 0,001256424 | down | -2,6084304 | CCDC33  | Homo sapiens coiled-coil domain containing 33 (CCDC33), transcript variant 1, mRNA [NM_025055]                |
| A_33_P3328726  | 0,03785341  | down | -1,668882  | CCDC33  | Homo sapiens coiled-coil domain containing 33 (CCDC33), transcript variant 1, mRNA [NM_025055]                |
| A_23_P402176   | 0,025902273 | up   | 2,9043152  | CCDC42  | Homo sapiens coiled-coil domain containing 42 (CCDC42), transcript variant 1, mRNA [NM_144681]                |
| A_24_P940620   | 0,026630698 | down | -1,5328398 | CCDC57  | coiled-coil domain containing 57 [Source:HGNC Symbol;Acc:HGNC:27564] [ENST00000327026]                        |
| A_33_P3355247  | 0,001883982 | down | -1,7335064 | CCDC69  | Homo sapiens coiled-coil domain containing 69 (CCDC69), mRNA [NM_015621]                                      |
| A_33_P3368833  | 0,033117328 | up   | 2,343939   | CCDC73  | Homo sapiens coiled-coil domain containing 73 (CCDC73), mRNA [NM_001008391]                                   |
| A_24_P680657   | 0,029661966 | up   | 2,3946407  | CCDC73  | Homo sapiens coiled-coil domain containing 73 (CCDC73), mRNA [NM_001008391]                                   |
| A_23_P128008   | 0,04504393  | up   | 1,9336817  | CCDC81  | Homo sapiens coiled-coil domain containing 81 (CCDC81), transcript variant 2, mRNA [NM_021827]                |
| A_24_P636332   | 0,019390367 | up   | 1,501096   | CCDC84  | Homo sapiens coiled-coil domain containing 84 (CCDC84), transcript variant 1, mRNA [NM_198489]                |
| A_23_P37391    | 0,014914638 | up   | 1,9355748  | CCDC85C | Homo sapiens coiled-coil domain containing 85C (CCDC85C), mRNA [NM_001144995]                                 |
| A_33_P3351735  | 9,73E-07    | down | -5,8407197 | CCDC87  | Homo sapiens coiled-coil domain containing 87 (CCDC87), mRNA [NM_018219]                                      |
| A_24_P192988   | 4,67E-06    | up   | 4,36685    | CCDC89  | coiled-coil domain containing 89 [Source:HGNC Symbol;Acc:HGNC:26762] [ENST00000316398]                        |
| A_23_P79661    | 0,003301081 | up   | 1,5144651  | CCDC93  | Homo sapiens coiled-coil domain containing 93 (CCDC93), mRNA [NM_019044]                                      |
| A_23_P425681   | 7,88E-04    | down | -2,7723253 | CCK     | Homo sapiens cholecystokinin (CCK), transcript variant 1, mRNA [NM_000729]                                    |
| A_23_P162010   | 0,027224194 | up   | 1,5794512  | CCKBR   | Homo sapiens cholecystokinin B receptor (CCKBR), mRNA [NM_176875]                                             |
| A_23_P218369   | 0,003124131 | up   | 2,3154924  | CCL14   | Homo sapiens chemokine (C-C motif) ligand 14 (CCL14), transcript variant 3, mRNA [NM_032963]                  |
| A_33_P3324004  | 6,44E-04    | down | -2,0327985 | CCL15   | Homo sapiens chemokine (C-C motif) ligand 15 (CCL15), mRNA [NM_032965]                                        |
| A_23_P55270    | 0,011740174 | up   | 1,6595211  | CCL18   | Homo sapiens chemokine (C-C motif) ligand 18 (pulmonary and activation-regulated) (CCL18), mRNA [NM_002988]   |
| A_23_P17065    | 0,003304017 | up   | 3,2915943  | CCL20   | Homo sapiens chemokine (C-C motif) ligand 20 (CCL20), transcript variant 1, mRNA [NM_004591]                  |
| A_33_P3285945  | 0,022399796 | down | -1,5837394 | CCL21   | Homo sapiens chemokine (C-C motif) ligand 21 (CCL21), mRNA [NM_002989]                                        |
| A_33_P3273623  | 0,001517262 | up   | 2,7256968  | CCL21   | Homo sapiens chemokine (C-C motif) ligand 21 (CCL21), mRNA [NM_002989]                                        |
| A_24_P313418   | 0,002711889 | up   | 2,312314   | CCL22   | Homo sapiens chemokine (C-C motif) ligand 22 (CCL22), mRNA [NM_002990]                                        |
| A_23_P215491   | 0,0339459   | down | -1,6506284 | CCL24   | Homo sapiens chemokine (C-C motif) ligand 24 (CCL24), mRNA [NM_002991]                                        |
| A_23_P78037    | 0,006466149 | up   | 1,7884573  | CCL7    | Homo sapiens chemokine (C-C motif) ligand 7 (CCL7), mRNA [NM_006273]                                          |
| A_33_P3380772  | 0,006543832 | down | -3,1228104 | CCM2L   | Homo sapiens cerebral cavernous malformation 2-like (CCM2L), mRNA [NM_080625]                                 |
| A_23_P202837   | 0,043515656 | up   | 1,549355   | CCND1   | Homo sapiens cyclin D1 (CCND1), mRNA [NM_053056]                                                              |
| A_23_P24176    | 0,007845075 | up   | 1,6680956  | CCNJ    | Homo sapiens cyclin J (CCNJ), transcript variant 2, mRNA [NM_019084]                                          |
| A_24_P51588    | 0,007735003 | up   | 1,5011964  | CCNL2   | Homo sapiens cyclin L2 (CCNL2), transcript variant 1, mRNA [NM_030937]                                        |
| A_23_P98963    | 2,62E-05    | up   | 1,7875533  | CCNT1   | Homo sapiens cyclin T1 (CCNT1), transcript variant b, mRNA [NM_001277842]                                     |
| A_33_P3329922  | 0,014569812 | up   | 1,9338719  | CCNYL2  | Homo sapiens cyclin Y-like 2, pseudogene (CCNYL2), non-coding RNA [NR_103829]                                 |
| A_23_P250302   | 0,011863328 | up   | 2,0989566  | CCR3    | Homo sapiens chemokine (C-C motif) receptor 3 (CCR3), transcript variant 1, mRNA [NM_001837]                  |
| A_23_P331928   | 0,042595293 | up   | 1,9395188  | CD109   | Homo sapiens CD109 molecule (CD109), transcript variant 1, mRNA [NM_133493]                                   |
| A_23_P61466    | 0,001437014 | down | -2,6993966 | CD163L1 | Homo sapiens CD163 molecule-like 1 (CD163L1), transcript variant 2, mRNA [NM_174941]                          |
| A_33_P3232080  | 0,037687495 | up   | 2,0245526  | CD177   | Homo sapiens CD177 molecule (CD177), mRNA [NM_020406]                                                         |
| A_33_P3232086  | 6,48E-04    | up   | 3,7797058  | CD177   | Homo sapiens mRNA for NB1 glycoprotein (NB1 gene), negative phenotype #1. [AJ310433]                          |
| A_23_P113572   | 5,92E-05    | down | -2,1480355 | CD19    | Homo sapiens CD19 molecule (CD19), transcript variant 2, mRNA [NM_001770]                                     |
| A_23_P402670   | 5,37E-06    | down | -3,7468238 | CD1A    | Homo sapiens CD1a molecule (CD1A), mRNA [NM_001763]                                                           |
| A_33_P3408655  | 0,004719882 | down | -2,4622576 | CD2     | Homo sapiens cDNA, FLJ17718. [AK310676]                                                                       |
| A_23_P161076   | 2,48E-04    | down | -3,5607443 | CD2     | Homo sapiens CD2 molecule (CD2), mRNA [NM_001767]                                                             |
| A_24_P186539   | 0,007357374 | down | -1,7667044 | CD209   | Homo sapiens CD209 molecule (CD209), transcript variant 1, mRNA [NM_021155]                                   |
| A_23_P85453    | 2,12E-04    | down | -3,1463666 | CD244   | Homo sapiens CD244 molecule, natural killer cell receptor 2B4 (CD244), transcript variant 1, mRNA [NM_016382] |
| A_33_P3337485  | 4,24E-06    | down | -6,5178323 | CD248   | Homo sapiens CD248 molecule, endosialin (CD248), mRNA [NM_020404]                                             |
| A_33_P3381513  | 0,006298159 | down | -2,4580994 | CD274   | Homo sapiens CD274 molecule (CD274), transcript variant 1, mRNA [NM_014143]                                   |
| A_23_P338479   | 0,009201013 | down | -2,061184  | CD274   | Homo sapiens CD274 molecule (CD274), transcript variant 1, mRNA [NM_014143]                                   |
| A_24_P930975   | 0,00711243  | up   | 1,8312323  | CD300LD | Homo sapiens CD300 molecule-like family member d (CD300LD), mRNA [NM_001115152]                               |
| A_24_P305050   | 0,006615171 | down | -2,1730132 | CD300LG | Homo sapiens CD300 molecule-like family member g (CD300LG), transcript variant 1, mRNA [NM_145273]            |

|                |             |      |            |            |                                                                                                                                          |
|----------------|-------------|------|------------|------------|------------------------------------------------------------------------------------------------------------------------------------------|
| A_21_P0000094  | 0,046811096 | down | -2,1490846 | CD33       | Homo sapiens CD33 molecule (CD33), transcript variant 3, mRNA [NM_001177608]                                                             |
| A_23_P331748   | 0,013609384 | up   | 2,5934112  | CD33       | Homo sapiens CD33 molecule (CD33), transcript variant 1, mRNA [NM_0011772]                                                               |
| A_33_P3225046  | 5,56E-04    | down | -2,8348346 | CD34       | Homo sapiens CD34 molecule (CD34), transcript variant 1, mRNA [NM_001025109]                                                             |
| A_33_P3375541  | 3,04E-04    | down | -4,321667  | CD3D       | Homo sapiens CD3d molecule, delta (CD3-TCR complex) (CD3D), transcript variant 1, mRNA [NM_000732]                                       |
| A_23_P208310   | 0,008759373 | up   | 1,5025588  | CD3EAP     | Homo sapiens CD3e molecule, epsilon associated protein (CD3EAP), transcript variant 2, mRNA [NM_012099]                                  |
| A_24_P295999   | 0,00230018  | down | -2,0094502 | CD4        | Homo sapiens CD4 molecule (CD4), transcript variant 1, mRNA [NM_000616]                                                                  |
| A_24_P784765   | 0,00454094  | up   | 1,9941286  | CD59       | Homo sapiens CD59 molecule, complement regulatory protein (CD59), transcript variant 1, mRNA [NM_203330]                                 |
| A_23_P87879    | 0,024972405 | up   | 1,7708118  | CD69       | Homo sapiens CD69 molecule (CD69), mRNA [NM_001781]                                                                                      |
| A_33_P3417215  | 0,037861183 | up   | 2,156851   | CD72       | CD72 molecule [Source:HGNC Symbol;Acc:HGNC:1696] [ENST00000378431]                                                                       |
| A_23_P70095    | 0,026682056 | up   | 1,5889329  | CD74       | Homo sapiens CD74 molecule, major histocompatibility complex, class II invariant chain (CD74), transcript variant 3, mRNA [NM_001025158] |
| A_21_P0007312  | 0,010089157 | up   | 2,360503   | CD81-AS1   | Homo sapiens CD81 antisense RNA 1 (CD81-AS1), long non-coding RNA [NR_108080]                                                            |
| A_33_P3228837  | 0,027940307 | down | -1,7684418 | CD8A       | Homo sapiens CD8a molecule (CD8A), transcript variant 3, mRNA [NM_001145873]                                                             |
| A_32_P163247   | 8,32E-06    | down | -4,4355097 | CD8A       | Homo sapiens CD8a molecule (CD8A), transcript variant 1, mRNA [NM_001768]                                                                |
| A_24_P68222    | 0,005252489 | up   | 1,6286755  | CD99P1     | Homo sapiens CD99 molecule pseudogene 1 (CD99P1), transcript variant 2, non-coding RNA [NR_033381]                                       |
| A_33_P3231557  | 0,005462163 | down | -1,5598055 | CDC14B     | Homo sapiens cell division cycle 14B (CDC14B), transcript variant 1, mRNA [NM_003671]                                                    |
| A_23_P149200   | 0,001298583 | down | -2,1254947 | CDC20      | Homo sapiens cell division cycle 20 (CDC20), mRNA [NM_001255]                                                                            |
| A_23_P210726   | 0,032197572 | up   | 1,6517742  | CDC25B     | Homo sapiens cell division cycle 25B (CDC25B), transcript variant 1, mRNA [NM_021873]                                                    |
| A_23_P1602     | 0,009650124 | up   | 1,7577429  | CDC42EP2   | Homo sapiens CDC42 effector protein (Rho GTPase binding) 2 (CDC42EP2), mRNA [NM_006779]                                                  |
| A_33_P3331307  | 0,033897676 | down | -1,5629555 | CDC42EP3   | Homo sapiens CDC42 effector protein (Rho GTPase binding) 3 (CDC42EP3), transcript variant 1, mRNA [NM_006449]                            |
| A_23_P66891    | 0,01923892  | up   | 1,5023733  | CDC42EP4   | Homo sapiens CDC42 effector protein (Rho GTPase binding) 4 (CDC42EP4), mRNA [NM_012121]                                                  |
| A_33_P3342235  | 7,86E-04    | down | -2,2596657 | CDC42EP5   | Homo sapiens CDC42 effector protein (Rho GTPase binding) 5 (CDC42EP5), mRNA [NM_145057]                                                  |
| A_23_P320887   | 0,005005766 | up   | 1,7695841  | CDC42SE1   | Homo sapiens CDC42 small effector 1 (CDC42SE1), transcript variant 1, mRNA [NM_001038707]                                                |
| A_33_P3218450  | 0,030113665 | down | -2,2372382 | CDC6       | Homo sapiens cell division cycle 6 (CDC6), mRNA [NM_001254]                                                                              |
| A_33_P3296169  | 0,038098224 | down | -1,56226   | CDCA7      | Homo sapiens cell division cycle associated 7 (CDCA7), transcript variant 1, mRNA [NM_031942]                                            |
| A_23_P251421   | 0,013571911 | up   | 1,9711822  | CDCA7      | Homo sapiens cell division cycle associated 7 (CDCA7), transcript variant 1, mRNA [NM_031942]                                            |
| A_19_P00808208 | 1,00E-04    | up   | 2,5704663  | CDCA7L     | Homo sapiens cell division cycle associated 7-like (CDCA7L), transcript variant 2, mRNA [NM_001127370]                                   |
| A_32_P25357    | 5,02E-04    | down | -7,389543  | CDH15      | Homo sapiens cadherin 15, type 1, M-cadherin (myotubule) (CDH15), mRNA [NM_004933]                                                       |
| A_23_P55586    | 0,02983519  | up   | 1,8347712  | CDH20      | Homo sapiens cadherin 20, type 2 (CDH20), mRNA [NM_031891]                                                                               |
| A_23_P40192    | 0,005879337 | down | -1,7318448 | CDH22      | Homo sapiens cadherin 22, type 2 (CDH22), mRNA [NM_021248]                                                                               |
| A_33_P3728167  | 0,019367564 | down | -1,7221159 | CDH5       | Homo sapiens cadherin 5, type 2 (vascular endothelium) (CDH5), mRNA [NM_001795]                                                          |
| A_24_P382287   | 1,17E-05    | down | -4,0800266 | CDH7       | Homo sapiens cadherin 7, type 2 (CDH7), transcript variant b, mRNA [NM_004361]                                                           |
| A_23_P92999    | 0,023771705 | down | -2,7576294 | CDH9       | Homo sapiens cadherin 9, type 2 (T1-cadherin) (CDH9), mRNA [NM_016279]                                                                   |
| A_24_P358805   | 0,006928236 | up   | 1,6619374  | CDHR1      | Homo sapiens cadherin-related family member 1 (CDHR1), transcript variant 2, mRNA [NM_001171971]                                         |
| A_23_P133338   | 0,004773735 | down | -2,2586293 | CDHR2      | Homo sapiens cadherin-related family member 2 (CDHR2), transcript variant 2, mRNA [NM_017675]                                            |
| A_24_P352388   | 0,007394767 | up   | 1,5371187  | CDHR5      | Homo sapiens cadherin-related family member 5 (CDHR5), transcript variant 3, mRNA [NM_031264]                                            |
| A_33_P3333360  | 0,004100029 | down | -1,6626391 | CDIP1      | Homo sapiens cell death-inducing p53 target 1 (CDIP1), transcript variant 1, mRNA [NM_001199054]                                         |
| A_24_P865226   | 0,009444265 | up   | 2,686029   | CDIPT-AS1  | Homo sapiens CDIPT antisense RNA 1 (head to head) (CDIPT-AS1), transcript variant 1, long non-coding RNA [NR_015396]                     |
| A_33_P3288180  | 0,004274086 | up   | 1,5713006  | CDK11A     | Homo sapiens cyclin-dependent kinase 11A (CDK11A), transcript variant 1, mRNA [NM_024011]                                                |
| A_24_P198820   | 9,45E-04    | up   | 1,5067244  | CDK12      | Homo sapiens cyclin-dependent kinase 12 (CDK12), transcript variant 1, mRNA [NM_016507]                                                  |
| A_23_P89155    | 1,47E-04    | down | -2,0411613 | CDK3       | Homo sapiens cyclin-dependent kinase 3 (CDK3), mRNA [NM_001258]                                                                          |
| A_33_P3226985  | 0,023623267 | up   | 1,7322665  | CDK5R1     | Homo sapiens cyclin-dependent kinase 5, regulatory subunit 1 (p35) (CDK5R1), mRNA [NM_003885]                                            |
| A_24_P51683    | 4,38E-04    | down | -4,809555  | CDK5R2     | Homo sapiens cyclin-dependent kinase 5, regulatory subunit 2 (p39) (CDK5R2), mRNA [NM_003936]                                            |
| A_23_P44781    | 9,20E-04    | up   | 2,2092495  | CDKAL1     | Homo sapiens CDK5 regulatory subunit associated protein 1-like 1 (CDKAL1), mRNA [NM_017774]                                              |
| A_24_P282343   | 0,015573337 | up   | 1,5056881  | CDKL5      | Homo sapiens cyclin-dependent kinase-like 5 (CDKL5), transcript variant I, mRNA [NM_003159]                                              |
| A_23_P204696   | 4,62E-04    | down | -1,7872244 | CDKN1B     | Homo sapiens cyclin-dependent kinase inhibitor 1B (p27, Kip1) (CDKN1B), mRNA [NM_004064]                                                 |
| A_23_P307502   | 0,00501539  | down | -1,904884  | CDKN2A-AS1 | Homo sapiens CDKN2A antisense RNA 1 (head to head) (CDKN2A-AS1), long non-coding RNA [NR_024274]                                         |
| A_33_P3307903  | 0,009691667 | up   | 2,482482   | CDKN3      | Homo sapiens cyclin-dependent kinase inhibitor 3 (CDKN3), transcript variant 1, mRNA [NM_005192]                                         |
| A_23_P30294    | 0,04234366  | up   | 1,5243511  | CDO1       | Homo sapiens cysteine dioxygenase type 1 (CDO1), mRNA [NM_001801]                                                                        |
| A_21_P0009302  | 0,007560723 | up   | 2,4652426  | CDRT1      | Homo sapiens CMT1A duplicated region transcript 1 (CDRT1), transcript variant 2, mRNA [NM_001282540]                                     |
| A_21_P0011514  | 6,57E-04    | down | -2,6141567 | CDRT15L2   | Homo sapiens CMT1A duplicated region transcript 15-like 2 (CDRT15L2), mRNA [NM_001190790]                                                |
| A_33_P3413895  | 1,86E-06    | down | -3,3361976 | CDRT15P1   | Homo sapiens CMT1A duplicated region transcript 15 pseudogene 1 (CDRT15P1), non-coding RNA [NR_003261]                                   |
| A_21_P0000608  | 1,16E-06    | down | -3,8243082 | CDRT15P2   | Homo sapiens CMT1A duplicated region transcript 15 pseudogene 2 (CDRT15P2), non-coding RNA [NR_033865]                                   |
| A_33_P3629131  | 0,001670588 | down | -1,6157066 | CDRT3      | DKFZp686P15240_r1 686 (synonym: hlcc3) Homo sapiens cDNA clone DKFZp686P15240 5', mRNA sequence [BX484257]                               |
| A_33_P3629151  | 0,039265983 | down | -2,067086  | CDRT8      | qf35h11.x1 Soares_testis_NHT Homo sapiens cDNA clone IMAGE:1752069 3', mRNA sequence [AI150443]                                          |
| A_23_P7250     | 0,012445125 | up   | 1,7029341  | CDS1       | Homo sapiens CDP-diacylglycerol synthase (phosphatidate cytidyltransferase) 1 (CDS1), mRNA [NM_001263]                                   |
| A_33_P3386262  | 0,042680535 | up   | 1,7525376  | CDT1       | Homo sapiens chromatin licensing and DNA replication factor 1 (CDT1), mRNA [NM_030928]                                                   |
| A_23_P58788    | 1,52E-05    | down | -4,2847047 | CDX1       | Homo sapiens caudal type homeobox 1 (CDX1), mRNA [NM_001804]                                                                             |
| A_32_P401091   | 0,040518202 | up   | 1,5491887  | CDY2A      | Homo sapiens chromodomain protein, Y-linked, 2A (CDY2A), mRNA [NM_004825]                                                                |
| A_23_P78526    | 0,001392291 | down | -2,4651396 | CEACAM19   | Homo sapiens carcinoembryonic antigen-related cell adhesion molecule 19 (CEACAM19), transcript variant 2, mRNA [NM_020219]               |
| A_24_P118376   | 0,023620382 | down | -1,735538  | CEACAM20   | Homo sapiens carcinoembryonic antigen-related cell adhesion molecule 20 (CEACAM20), transcript variant 4S, mRNA [NM_001102598]           |
| A_33_P3265309  | 0,015854158 | down | -2,123054  | CEACAM4    | Homo sapiens carcinoembryonic antigen-related cell adhesion molecule 4 (CEACAM4), mRNA [NM_001817]                                       |

|               |             |      |            |           |                                                                                                                        |
|---------------|-------------|------|------------|-----------|------------------------------------------------------------------------------------------------------------------------|
| A_33_P3241489 | 0,005456397 | down | -2,92738   | CEBPZOS   | Homo sapiens CEBPZ opposite strand (CEBPZOS), transcript variant 1, long non-coding RNA [NR_037879]                    |
| A_23_P211326  | 4,57E-04    | down | -3,2235022 | CECR2     | Homo sapiens cat eye syndrome chromosome region, candidate 2 (CECR2), transcript variant 1, mRNA [NM_001290047]        |
| A_23_P46238   | 0,003807392 | down | -1,6638838 | CELA2A    | Homo sapiens chymotrypsin-like elastase family, member 2A (CELA2A), mRNA [NM_033440]                                   |
| A_23_P115645  | 0,013375069 | down | -1,6101028 | CELF2     | Homo sapiens CUGBP, Elav-like family member 2 (CELF2), transcript variant 1, mRNA [NM_001025076]                       |
| A_23_P337849  | 0,004098706 | down | -1,6718253 | CELF3     | Homo sapiens CUGBP, Elav-like family member 3 (CELF3), transcript variant 1, mRNA [NM_007185]                          |
| A_24_P84396   | 0,003567911 | down | -1,8202022 | CEMIP     | Homo sapiens cell migration inducing protein, hyaluronan binding (CEMIP), transcript variant 3, mRNA [NM_018689]       |
| A_23_P155989  | 0,028260088 | up   | 1,8596663  | CENPK     | Homo sapiens centromere protein K (CENPK), transcript variant 1, mRNA [NM_022145]                                      |
| A_33_P3387856 | 0,001934981 | up   | 1,7731589  | CENPN     | Homo sapiens centromere protein N (CENPN), transcript variant 1, mRNA [NM_001100625]                                   |
| A_33_P3387931 | 0,008390521 | up   | 1,7065606  | CENPP     | Homo sapiens centromere protein P (CENPP), transcript variant 1, mRNA [NM_001012267]                                   |
| A_33_P3316318 | 2,33E-04    | down | -3,0072806 | CEP120    | centrosomal protein 120kDa [Source:HGNC Symbol;Acc:HGNC:26690] [ENST00000513565]                                       |
| A_23_P89710   | 0,00422314  | up   | 1,5953163  | CEP192    | Homo sapiens centrosomal protein 192kDa (CEP192), mRNA [NM_032142]                                                     |
| A_33_P3308905 | 0,04473067  | up   | 1,5482205  | CEP57L1   | Homo sapiens centrosomal protein 57kDa-like 1 (CEP57L1), transcript variant 4, mRNA [NM_001271853]                     |
| A_33_P3265224 | 0,017436305 | up   | 1,7378798  | CEP68     | centrosomal protein 68kDa [Source:HGNC Symbol;Acc:HGNC:29076] [ENST00000537589]                                        |
| A_33_P3349496 | 0,028558487 | up   | 1,737262   | CEP83     | PREDICTED: Homo sapiens coiled-coil domain containing 41 (CCDC41), transcript variant X4, misc_RNA [XR_429106]         |
| A_23_P329798  | 0,005093244 | up   | 1,6173794  | CER1      | Homo sapiens cerberus 1, DAN family BMP antagonist (CER1), mRNA [NM_005454]                                            |
| A_24_P62237   | 0,011137427 | up   | 1,6700625  | CERK      | Homo sapiens ceramide kinase (CERK), mRNA [NM_022766]                                                                  |
| A_33_P3355538 | 0,008629097 | up   | 1,5983876  | CERKL     | Homo sapiens ceramide kinase-like (CERKL), transcript variant 2, mRNA [NM_001030311]                                   |
| A_23_P206733  | 0,030430181 | down | -1,8463308 | CES1      | Homo sapiens carboxylesterase 1 (CES1), transcript variant 3, mRNA [NM_001266]                                         |
| A_21_P0011496 | 0,003903005 | up   | 2,5043967  | CES1      | Homo sapiens carboxylesterase 1 (CES1), transcript variant 1, mRNA [NM_001025195]                                      |
| A_23_P374892  | 0,030947937 | up   | 1,6062461  | CES1P1    | Homo sapiens carboxylesterase 1 pseudogene 1 (CES1P1), non-coding RNA [NR_003276]                                      |
| A_21_P0012348 | 0,002149856 | down | -1,7301201 | CESSA     | Homo sapiens carboxylesterase 5A (CESSA), transcript variant 2, mRNA [NM_145024]                                       |
| A_23_P66967   | 0,018129745 | down | -2,2123945 | CETN1     | centrin, EF-hand protein, 1 [Source:HGNC Symbol;Acc:HGNC:1866] [ENST00000327228]                                       |
| A_33_P3233160 | 0,006843818 | down | -1,6671313 | CFAP36    | Homo sapiens cilia and flagella associated protein 36 (CFAP36), transcript variant 1, mRNA [NM_001282761]              |
| A_33_P3246193 | 0,02343372  | down | -1,889717  | CFAP46    | Homo sapiens cilia and flagella associated protein 46 (CFAP46), mRNA [NM_001200049]                                    |
| A_23_P75179   | 0,046678837 | up   | 2,0267203  | CFAP46    | Homo sapiens cilia and flagella associated protein 46 (CFAP46), mRNA [NM_001200049]                                    |
| A_33_P3341648 | 0,004549889 | up   | 3,442468   | CFAP46    | Homo sapiens cilia and flagella associated protein 46 (CFAP46), mRNA [NM_001200049]                                    |
| A_33_P3395804 | 0,002122528 | down | -1,7715048 | CFAP61    | Homo sapiens cilia and flagella associated protein 61 (CFAP61), transcript variant 2, mRNA [NM_001167816]              |
| A_33_P3420083 | 0,019846821 | down | -1,9947184 | CFAP74    | Homo sapiens cDNA FLJ37323 fis, clone BRAMY2018273. [AK094642]                                                         |
| A_33_P3336262 | 0,001368449 | down | -4,9972706 | CFAP74    | cilia and flagella associated protein 74 [Source:HGNC Symbol;Acc:HGNC:29368] [ENST00000412120]                         |
| A_33_P3410123 | 0,001914744 | up   | 2,3813667  | CFAP74    | cilia and flagella associated protein 74 [Source:HGNC Symbol;Acc:HGNC:29368] [ENST00000378592]                         |
| A_33_P3265965 | 0,014522439 | down | -1,5846591 | CFAP97    | Homo sapiens cilia and flagella associated protein 97 (CFAP97), transcript variant 2, mRNA [NM_001292033]              |
| A_33_P3292230 | 0,013785527 | up   | 2,631982   | CFAP99    | Homo sapiens cilia and flagella associated protein 99 (CFAP99), mRNA [NM_001193282]                                    |
| A_24_P92472   | 0,018447837 | up   | 2,5921743  | CFI       | Homo sapiens complement factor 1 (CFI), mRNA [NM_000204]                                                               |
| A_21_P0001952 | 0,001209235 | up   | 2,143366   | CFLAR     | Homo sapiens CASP8 and FADD-like apoptosis regulator (CFLAR), transcript variant 8, mRNA [NM_001202519]                |
| A_24_P120115  | 9,73E-04    | up   | 1,6651971  | CFLAR     | Homo sapiens CASP8 and FADD-like apoptosis regulator (CFLAR), transcript variant 1, mRNA [NM_003879]                   |
| A_33_P3626816 | 0,006243705 | up   | 2,457341   | CFLAR-AS1 | Homo sapiens CFLAR antisense RNA 1 (CFLAR-AS1), long non-coding RNA [NR_040030]                                        |
| A_23_P27709   | 0,002698615 | down | -3,251489  | CGB2      | Homo sapiens chorionic gonadotropin, beta polypeptide 2 (CGB2), mRNA [NM_033378]                                       |
| A_21_P0013947 | 0,04918295  | down | -1,5645117 | CGB7      | chorionic gonadotropin, beta polypeptide 7 [Source:HGNC Symbol;Acc:HGNC:16451] [ENST00000598442]                       |
| A_23_P363163  | 9,00E-04    | up   | 1,6188563  | CGGBP1    | Homo sapiens CGG triplet repeat binding protein 1 (CGGBP1), transcript variant 1, mRNA [NM_001008390]                  |
| A_33_P3329974 | 0,030297454 | up   | 1,6807488  | CGN       | Homo sapiens cingulin (CGN), mRNA [NM_020770]                                                                          |
| A_21_P0000061 | 3,41E-04    | down | -1,7977105 | CGREF1    | Homo sapiens cell growth regulator with EF-hand domain 1 (CGREF1), transcript variant 5, mRNA [NM_001301324]           |
| A_33_P3281850 | 0,014829683 | down | -2,0037453 | CGREF1    | cell growth regulator with EF-hand domain 1 [Source:HGNC Symbol;Acc:HGNC:16962] [ENST00000440612]                      |
| A_32_P194264  | 0,007264215 | down | -2,3087862 | CHAC2     | Homo sapiens ChaC, cation transport regulator homolog 2 (E. coli) (CHAC2), mRNA [NM_001008708]                         |
| A_33_P3416366 | 0,018308803 | up   | 1,5319493  | CHAF1A    | Homo sapiens chromatin assembly factor 1, subunit A (p150) (CHAF1A), mRNA [NM_005483]                                  |
| A_23_P46894   | 1,96E-06    | down | -4,754198  | CHAT      | Homo sapiens choline O-acetyltransferase (CHAT), transcript variant M, mRNA [NM_020549]                                |
| A_24_P400376  | 0,001360349 | down | -1,7831373 | CHCHD2    | Homo sapiens coiled-coil-helix-coiled-coil-helix domain containing 2 (CHCHD2), mRNA [NM_016139]                        |
| A_24_P379727  | 0,001662958 | down | -1,5655147 | CHCHD5    | coiled-coil-helix-coiled-coil-helix domain containing 5 [Source:HGNC Symbol;Acc:HGNC:17840] [ENST00000489052]          |
| A_33_P3315258 | 0,003169751 | down | -1,6488701 | CHD1L     | Homo sapiens chromodomain helicase DNA binding protein 1-like (CHD1L), transcript variant 1, mRNA [NM_004284]          |
| A_24_P85317   | 0,02884298  | down | -1,6420432 | CHD2      | Homo sapiens chromodomain helicase DNA binding protein 2 (CHD2), transcript variant 2, mRNA [NM_001042572]             |
| A_24_P264664  | 0,002320646 | up   | 1,760656   | CHD2      | Homo sapiens chromodomain helicase DNA binding protein 2 (CHD2), transcript variant 1, mRNA [NM_001271]                |
| A_24_P289383  | 0,005215926 | up   | 1,612137   | CHD7      | Homo sapiens chromodomain helicase DNA binding protein 7 (CHD7), mRNA [NM_017780]                                      |
| A_23_P34888   | 1,90E-06    | down | -9,308448  | CHIA      | Homo sapiens chitinase, acidic (CHIA), transcript variant 2, mRNA [NM_021797]                                          |
| A_33_P3347528 | 0,006059417 | down | -2,744952  | CHIAP2    | chitinase, acidic pseudogene 2 [Source:HGNC Symbol;Acc:HGNC:44463] [ENST00000369743]                                   |
| A_23_P110345  | 0,00926203  | up   | 1,7784241  | CHIC2     | Homo sapiens cysteine-rich hydrophobic domain 2 (CHIC2), mRNA [NM_012110]                                              |
| A_23_P314120  | 0,037599258 | up   | 1,5856392  | CHKB      | Homo sapiens choline kinase beta (CHKB), mRNA [NM_005198]                                                              |
| A_24_P287780  | 0,004640854 | down | -1,6041877 | CHMP1A    | Homo sapiens charged multivesicular body protein 1A (CHMP1A), transcript variant 2, mRNA [NM_002768]                   |
| A_21_P0013823 | 0,016939819 | up   | 1,7130407  | CHMP1B2P  | Homo sapiens charged multivesicular body protein 1B2, pseudogene (CHMP1B2P), non-coding RNA [NR_110646]                |
| A_24_P945293  | 0,049607385 | down | -1,6153692 | CHMP3     | Homo sapiens charged multivesicular body protein 3 (CHMP3), transcript variant 1, mRNA [NM_016079]                     |
| A_33_P3287348 | 4,00E-04    | down | -3,3547635 | CHN2      | Homo sapiens chimerin 2 (CHN2), transcript variant 4, mRNA [NM_001293070]                                              |
| A_33_P3217198 | 0,036514025 | up   | 1,7209828  | CHODL-AS1 | Homo sapiens CHODL antisense RNA 1 (CHODL-AS1), long non-coding RNA [NR_024354]                                        |
| A_23_P138805  | 0,001178233 | up   | 1,6891029  | CHORDC1   | Homo sapiens cysteine and histidine-rich domain (CHORD) containing 1 (CHORDC1), transcript variant 1, mRNA [NM_012124] |

|               |                  |            |           |                                                                                                                                                 |
|---------------|------------------|------------|-----------|-------------------------------------------------------------------------------------------------------------------------------------------------|
| A_23_P13548   | 0,019218529 up   | 1,9116877  | CHRD12    | chordin-like 2 [Source:HGNC Symbol;Acc:HGNC:24168] [ENST00000376332]                                                                            |
| A_33_P3351298 | 0,023953466 up   | 1,9089944  | CHRM2     | cholinergic receptor, muscarinic 2 [Source:HGNC Symbol;Acc:HGNC:1951] [ENST00000480591]                                                         |
| A_21_P0013981 | 9,74E-04 down    | -2,0198975 | CHRM3     | cholinergic receptor, muscarinic 3 [Source:HGNC Symbol;Acc:HGNC:1952] [ENST00000481779]                                                         |
| A_23_P401472  | 0,047449134 up   | 2,0814574  | CHRM3     | Homo sapiens cholinergic receptor, muscarinic 3 (CHRM3), mRNA [NM_000740]                                                                       |
| A_33_P3367850 | 0,006948927 down | -2,2006845 | CHRM4     | Homo sapiens cholinergic receptor, muscarinic 4 (CHRM4), mRNA [NM_000741]                                                                       |
| A_33_P3388147 | 0,014153615 up   | 2,4225132  | CHRNA3    | Homo sapiens cholinergic receptor, nicotinic, alpha 3 (neuronal) (CHRNA3), transcript variant 2, mRNA [NM_001166694]                            |
| A_23_P88691   | 0,011515127 down | -1,9405705 | CHRNA5    | Homo sapiens cholinergic receptor, nicotinic, alpha 5 (neuronal) (CHRNA5), mRNA [NM_000745]                                                     |
| A_23_P157593  | 0,027669668 down | -1,8169965 | CHRNA6    | Homo sapiens cholinergic receptor, nicotinic, alpha 6 (neuronal) (CHRNA6), transcript variant 1, mRNA [NM_004198]                               |
| A_23_P123424  | 0,00230288 down  | -1,9914637 | CHRNB3    | Homo sapiens cholinergic receptor, nicotinic, beta 3 (neuronal) (CHRNB3), mRNA [NM_000749]                                                      |
| A_23_P304279  | 0,010832148 down | -2,641827  | CHRNE     | Homo sapiens cholinergic receptor, nicotinic, epsilon (muscle) (CHRNE), mRNA [NM_000080]                                                        |
| A_23_P98205   | 0,0047318 down   | -2,126139  | CHST1     | Homo sapiens carbohydrate (keratan sulfate Gal-6) sulfotransferase 1 (CHST1), mRNA [NM_003654]                                                  |
| A_23_P80473   | 3,76E-04 down    | -2,3302994 | CHST13    | Homo sapiens carbohydrate (chondroitin 4) sulfotransferase 13 (CHST13), mRNA [NM_152889]                                                        |
| A_23_P430670  | 0,002399346 down | -1,694095  | CHST5     | Homo sapiens carbohydrate (N-acetylglucosamine 6-O) sulfotransferase 5 (CHST5), mRNA [NM_024533]                                                |
| A_23_P90273   | 1,65E-04 down    | -1,9655869 | CHST8     | Homo sapiens carbohydrate (N-acetylglucosamine 4-O) sulfotransferase 8 (CHST8), transcript variant 3, mRNA [NM_022467]                          |
| A_23_P368886  | 0,011733693 up   | 2,614214   | CHSY3     | Homo sapiens chondroitin sulfate synthase 3 (CHSY3), mRNA [NM_175856]                                                                           |
| A_23_P410717  | 0,001488702 up   | 1,750577   | CIART     | Homo sapiens circadian associated repressor of transcription (CIART), transcript variant 1, mRNA [NM_144697]                                    |
| A_23_P37359   | 0,02879568 down  | -1,6747525 | CIDEB     | Homo sapiens cell death-inducing DFFA-like effector b (CIDEB), mRNA [NM_014430]                                                                 |
| A_33_P3324394 | 0,004653296 down | -2,6218495 | CIITA     | Homo sapiens class II, major histocompatibility complex, transactivator (CIITA), transcript variant 3, mRNA [NM_001286403]                      |
| A_23_P372925  | 0,009690589 up   | 1,6191005  | CIPC      | Homo sapiens CLOCK-interacting pacemaker (CIPC), mRNA [NM_033426]                                                                               |
| A_33_P3362636 | 0,002627636 down | -2,1129327 | CISD3     | Homo sapiens CDGSH iron sulfur domain 3 (CISD3), mRNA [NM_001136498]                                                                            |
| A_33_P3312301 | 0,01122574 up    | 1,6481724  | CIT       | Homo sapiens citron rho-interacting serine/threonine kinase (CIT), transcript variant 1, mRNA [NM_001206999]                                    |
| A_23_P73526   | 0,036486465 down | -1,8135424 | CITED1    | Homo sapiens Cbp/p300-interacting transactivator, with Glu/Asp-rich carboxy-terminal domain, 1 (CITED1), transcript variant 1, mRNA [NM_004143] |
| A_24_P215804  | 0,003729039 down | -2,6928515 | CKLF      | Homo sapiens chemokine-like factor (CKLF), transcript variant 1, mRNA [NM_016951]                                                               |
| A_23_P50250   | 0,002254428 up   | 1,7011378  | CKM       | Homo sapiens creatine kinase, muscle (CKM), mRNA [NM_001824]                                                                                    |
| A_24_P618401  | 0,012608502 down | -1,5598154 | CKMT2-AS1 | Homo sapiens CKMT2 antisense RNA 1 (CKMT2-AS1), transcript variant 1, long non-coding RNA [NR_034121]                                           |
| A_23_P311232  | 6,11E-05 up      | 2,224919   | CLASP1    | Homo sapiens cytoplasmic linker associated protein 1 (CLASP1), transcript variant 1, mRNA [NM_015282]                                           |
| A_33_P3224250 | 0,016650908 down | -1,662424  | CLCC1     | Homo sapiens chloride channel CLIC-like 1 (CLCC1), transcript variant 1, mRNA [NM_001048210]                                                    |
| A_23_P59772   | 0,001642692 down | -2,0665634 | CLCN1     | Homo sapiens chloride channel, voltage-sensitive 1 (CLCN1), transcript variant 1, mRNA [NM_000083]                                              |
| A_21_P0013622 | 0,002283342 down | -2,4269674 | CLCN3     | Homo sapiens chloride channel, voltage-sensitive 3 (CLCN3), transcript variant a, mRNA [NM_001243372]                                           |
| A_33_P3415092 | 0,02116882 up    | 1,7488639  | CLCN5     | Homo sapiens chloride channel, voltage-sensitive 5 (CLCN5), transcript variant 1, mRNA [NM_001127899]                                           |
| A_24_P2361    | 0,013707844 down | -2,1040394 | CLCNKA    | Homo sapiens chloride channel, voltage-sensitive Ka (CLCNKA), transcript variant 1, mRNA [NM_004070]                                            |
| A_24_P224966  | 0,0354239 down   | -1,8670157 | CLCNKB    | Homo sapiens chloride channel, voltage-sensitive Kb (CLCNKB), transcript variant 1, mRNA [NM_000085]                                            |
| A_33_P3284036 | 0,002234023 up   | 1,670852   | CLDN14    | claudin 14 [Source:HGNC Symbol;Acc:HGNC:2035] [ENST00000478313]                                                                                 |
| A_33_P3249046 | 0,004168338 up   | 2,31434    | CLDN2     | Homo sapiens claudin 2 (CLDN2), transcript variant 2, mRNA [NM_001171092]                                                                       |
| A_33_P3410816 | 0,04481422 up    | 1,5299324  | CLDN20    | Homo sapiens claudin 20 (CLDN20), mRNA [NM_001001346]                                                                                           |
| A_33_P3280750 | 0,005409367 up   | 2,0741956  | CLDN25    | Homo sapiens claudin 25 (CLDN25), mRNA [NM_001101389]                                                                                           |
| A_33_P3378272 | 1,31E-04 down    | -3,5065687 | CLDN4     | claudin 4 [Source:HGNC Symbol;Acc:HGNC:2046] [ENST00000431918]                                                                                  |
| A_23_P128470  | 0,018434938 up   | 1,6665734  | CLEC12A   | Homo sapiens C-type lectin domain family 12, member A (CLEC12A), transcript variant 1, mRNA [NM_138337]                                         |
| A_32_P194246  | 5,58E-04 up      | 1,5906976  | CLEC16A   | Homo sapiens C-type lectin domain family 16, member A (CLEC16A), transcript variant 1, mRNA [NM_0152226]                                        |
| A_33_P3394362 | 0,022667361 down | -1,5451049 | CLEC19A   | Homo sapiens C-type lectin domain family 19, member A (CLEC19A), mRNA [NM_001256720]                                                            |
| A_33_P3236065 | 0,015412676 up   | 2,551869   | CLEC1B    | Homo sapiens C-type lectin domain family 1, member B (CLEC1B), transcript variant 1, mRNA [NM_016509]                                           |
| A_33_P3381255 | 0,004459971 down | -2,4468186 | CLEC2A    | Homo sapiens C-type lectin domain family 2, member A (CLEC2A), transcript variant 2, mRNA [NM_207375]                                           |
| A_23_P48029   | 0,006869038 up   | 1,5041587  | CLEC4A    | Homo sapiens C-type lectin domain family 4, member A (CLEC4A), transcript variant 1, mRNA [NM_016184]                                           |
| A_33_P3213235 | 0,00830558 down  | -2,4781516 | CLEC4G    | Homo sapiens C-type lectin domain family 4, member G (CLEC4G), transcript variant 1, mRNA [NM_198492]                                           |
| A_23_P208482  | 0,002154949 down | -2,4334755 | CLEC4M    | Homo sapiens C-type lectin domain family 4, member M (CLEC4M), transcript variant 2, mRNA [NM_001144904]                                        |
| A_23_P304356  | 0,005967342 up   | 1,5990499  | CLEC5A    | Homo sapiens C-type lectin domain family 5, member A (CLEC5A), transcript variant 1, mRNA [NM_013252]                                           |
| A_23_P257417  | 0,004748156 up   | 1,7403588  | CLHC1     | Homo sapiens clathrin heavy chain linker domain containing 1 (CLHC1), transcript variant 1, mRNA [NM_152385]                                    |
| A_23_P385067  | 0,026932927 up   | 2,883143   | CLIC6     | Homo sapiens chloride intracellular channel 6 (CLIC6), mRNA [NM_053277]                                                                         |
| A_21_P0014278 | 6,49E-04 up      | 1,9078076  | CLIP1-AS1 | Homo sapiens CLIP1 antisense RNA 1 (CLIP1-AS1), long non-coding RNA [NR_045382]                                                                 |
| A_24_P67027   | 0,004377851 up   | 1,6833444  | CLK2      | Homo sapiens CDC-like kinase 2 (CLK2), transcript variant 1, mRNA [NM_001294338]                                                                |
| A_32_P20691   | 0,007664878 down | -1,7279457 | CLK3      | Homo sapiens CDC-like kinase 3 (CLK3), transcript variant 2, mRNA [NM_003992]                                                                   |
| A_33_P3267989 | 0,002575991 up   | 1,5702981  | CLNK      | Homo sapiens cytokine-dependent hematopoietic cell linker (CLNK), mRNA [NM_052964]                                                              |
| A_23_P419038  | 0,001218614 up   | 1,5543065  | CLOCK     | Homo sapiens clock circadian regulator (CLOCK), transcript variant 2, mRNA [NM_004898]                                                          |
| A_23_P8142    | 0,048650343 down | -1,733737  | CLPS      | Homo sapiens colipase, pancreatic (CLPS), transcript variant 1, mRNA [NM_001832]                                                                |
| A_33_P3394347 | 0,005423827 down | -1,9430237 | CLRN1-AS1 | Homo sapiens CLRN1 antisense RNA 1 (CLRN1-AS1), non-coding RNA [NR_024066]                                                                      |
| A_24_P61753   | 0,006105791 up   | 1,5314384  | CLUH      | Homo sapiens clustered mitochondria (cluA/CLU1) homolog (CLUH), mRNA [NM_015229]                                                                |
| A_33_P3323238 | 0,00373203 up    | 1,5907513  | CLUL1     | Homo sapiens clusterin-like 1 (retinal) (CLUL1), transcript variant 3, mRNA [NM_001289036]                                                      |
| A_24_P269551  | 0,008712972 up   | 1,5566236  | CLVS1     | Homo sapiens clavesin 1 (CLVS1), mRNA [NM_173519]                                                                                               |
| A_21_P0008110 | 0,001238613 down | -1,7236023 | CLYBL     | Homo sapiens citrate lyase beta like (CLYBL), transcript variant 2, non-coding RNA [NR_104592]                                                  |
| A_33_P3259708 | 0,002686116 down | -3,5881226 | CMA1      | Homo sapiens chymase 1, mast cell (CMA1), mRNA [NM_001836]                                                                                      |
| A_21_P0000542 | 0,003812905 up   | 1,5547174  | CMAHP     | Homo sapiens cytidine monophospho-N-acetylneuraminic acid hydroxylase, pseudogene (CMAHP), transcript variant 2, non-coding RNA [NR_027626]     |



|               |                  |                     |                                                                                                                               |
|---------------|------------------|---------------------|-------------------------------------------------------------------------------------------------------------------------------|
| A_23_P371239  | 0,00102019 up    | 1,8268139 CMIP      | Homo sapiens c-Maf inducing protein (CMIP), transcript variant 1, mRNA [NM_198390]                                            |
| A_23_P115366  | 0,00677879 up    | 1,8284441 CMPK1     | Homo sapiens cytidine monophosphate (UMP-CMP) kinase 1, cytosolic (CMPK1), transcript variant 1, mRNA [NM_016308]             |
| A_23_P106042  | 0,001992758 down | -2,0395648 CMTM5    | Homo sapiens CKLF-like MARVEL transmembrane domain containing 5 (CMTM5), transcript variant 3, mRNA [NM_001037288]            |
| A_23_P374149  | 0,016214821 up   | 1,584496 CMTR1      | Homo sapiens cap methyltransferase 1 (CMTR1), mRNA [NM_015050]                                                                |
| A_23_P124946  | 0,008985943 up   | 2,017345 CMYA5      | Homo sapiens cardiomyopathy associated 5 (CMYA5), mRNA [NM_153610]                                                            |
| A_23_P9869    | 0,04576728 down  | -1,8986223 CNDP1    | Homo sapiens carnosine dipeptidase 1 (metallopeptidase M20 family) (CNDP1), mRNA [NM_032649]                                  |
| A_33_P3403549 | 4,01E-04 up      | 1,9591597 CNEP1R1   | Homo sapiens CTD nuclear envelope phosphatase 1 regulatory subunit 1 (CNEP1R1), transcript variant 1, mRNA [NM_153261]        |
| A_33_P3295738 | 0,012137467 down | -1,5438634 CNGB1    | Homo sapiens cyclic nucleotide gated channel beta 1 (CNGB1), transcript variant 2, mRNA [NM_001135639]                        |
| A_23_P216376  | 0,029464684 up   | 2,607827 CNGB3      | Homo sapiens cyclic nucleotide gated channel beta 3 (CNGB3), mRNA [NM_019098]                                                 |
| A_33_P3370634 | 0,010660959 up   | 1,7067461 CNIH1     | cornichon family AMPA receptor auxiliary protein 1 [Source:HGNC Symbol;Acc:HGNC:19431] [ENST00000557659]                      |
| A_24_P203315  | 0,002542454 down | -2,6691172 CNIH2    | Homo sapiens cornichon family AMPA receptor auxiliary protein 2 (CNIH2), transcript variant 1, mRNA [NM_182553]               |
| A_33_P3240722 | 0,011586685 up   | 1,548701 CNKSR2     | Homo sapiens connector enhancer of kinase suppressor of Ras 2 (CNKSR2), transcript variant 1, mRNA [NM_014927]                |
| A_23_P138168  | 0,023698628 up   | 1,7258986 CNN3      | Homo sapiens calponin 3, acidic (CNN3), transcript variant 1, mRNA [NM_001839]                                                |
| A_24_P93896   | 0,00249374 up    | 2,7414887 CNNM2     | Homo sapiens cyclin and CBS domain divalent metal cation transport mediator 2 (CNNM2), transcript variant 3, mRNA [NM_199077] |
| A_33_P3271171 | 0,009612307 down | -1,5576261 CNOT3    | CCR4-NOT transcription complex, subunit 3 [Source:HGNC Symbol;Acc:HGNC:7879] [ENST00000447684]                                |
| A_24_P941922  | 7,48E-05 up      | 2,131063 CNOT4      | CCR4-NOT transcription complex, subunit 4 [Source:HGNC Symbol;Acc:HGNC:7880] [ENST00000428680]                                |
| A_23_P110846  | 7,83E-04 up      | 1,5898323 CNOT8     | Homo sapiens CCR4-NOT transcription complex, subunit 8 (CNOT8), transcript variant 1, mRNA [NM_004779]                        |
| A_23_P310931  | 3,80E-04 down    | -2,771332 CNR2      | Homo sapiens cannabinoid receptor 2 (macrophage) (CNR2), mRNA [NM_001841]                                                     |
| A_33_P3315320 | 0,004322523 up   | 1,7382574 CNTD1     | Homo sapiens cyclin N-terminal domain containing 1 (CNTD1), mRNA [NM_173478]                                                  |
| A_33_P3409090 | 7,06E-04 down    | -2,982998 CNTN1     | Homo sapiens contactin 1 (CNTN1), transcript variant 4, mRNA [NM_001256064]                                                   |
| A_23_P390700  | 0,007623092 down | -2,287456 CNTN1     | Homo sapiens contactin 1 (CNTN1), transcript variant 1, mRNA [NM_001843]                                                      |
| A_24_P114142  | 0,006959795 down | -2,3191767 CNTN2    | Homo sapiens contactin 2 (axonal) (CNTN2), mRNA [NM_005076]                                                                   |
| A_23_P503059  | 0,007743829 up   | 1,9012928 CNTN5     | Homo sapiens contactin 5 (CNTN5), transcript variant 1, mRNA [NM_014361]                                                      |
| A_33_P3329378 | 0,004564306 down | -2,433023 CNTN6     | Homo sapiens contactin 6 (CNTN6), transcript variant 1, mRNA [NM_014461]                                                      |
| A_21_P0013630 | 2,96E-05 down    | -2,12658 CNTNAP3    | Homo sapiens contactin associated protein-like 3 (CNTNAP3), mRNA [NM_033655]                                                  |
| A_23_P56787   | 0,022395354 down | -2,1013687 CNTNAP5  | Homo sapiens contactin associated protein-like 5 (CNTNAP5), mRNA [NM_130773]                                                  |
| A_33_P3287379 | 0,003205908 down | -1,6007304 COG8     | Homo sapiens component of oligomeric golgi complex 8 (COG8), mRNA [NM_032382]                                                 |
| A_23_P214144  | 0,002074588 down | -1,833848 COL10A1   | Homo sapiens collagen, type X, alpha 1 (COL10A1), mRNA [NM_000493]                                                            |
| A_33_P3216448 | 0,004516994 down | -2,815546 COL11A2   | Homo sapiens collagen, type XI, alpha 2 (COL11A2), transcript variant 4, mRNA [NM_001163771]                                  |
| A_32_P80850   | 0,003720608 down | -3,8221629 COL14A1  | Homo sapiens collagen, type XIV, alpha 1 (COL14A1), mRNA [NM_021110]                                                          |
| A_33_P3395952 | 0,027361266 down | -1,675836 COL20A1   | Homo sapiens collagen, type XX, alpha 1 (COL20A1), mRNA [NM_020882]                                                           |
| A_23_P31124   | 0,013298092 down | -5,7974954 COL21A1  | Homo sapiens collagen, type XXI, alpha 1 (COL21A1), mRNA [NM_030820]                                                          |
| A_23_P134627  | 5,91E-05 down    | -3,6059496 COL26A1  | Homo sapiens collagen, type XXVI, alpha 1 (COL26A1), transcript variant 2, mRNA [NM_133457]                                   |
| A_33_P3398236 | 0,022317115 down | -2,4709964 COL28A1  | Homo sapiens partial mRNA for collagen, type XXVIII (COL28 gene), isoform 2. [AJ890452]                                       |
| A_33_P3262969 | 0,00637459 down  | -2,0853295 COL4A6   | collagen, type IV, alpha 6 [Source:HGNC Symbol;Acc:HGNC:2208] [ENST00000461897]                                               |
| A_23_P217379  | 0,016557684 up   | 1,8328223 COL4A6    | Homo sapiens collagen, type IV, alpha 6 (COL4A6), transcript variant B, mRNA [NM_033641]                                      |
| A_21_P0012396 | 3,78E-04 down    | -3,3985467 COL6A4P2 | Homo sapiens collagen, type VI, alpha 4 pseudogene 2 (COL6A4P2), non-coding RNA [NR_027898]                                   |
| A_33_P3311611 | 0,001709913 up   | 1,9748062 COL6A4P2  | Homo sapiens collagen, type VI, alpha 4 pseudogene 2 (COL6A4P2), non-coding RNA [NR_027898]                                   |
| A_24_P311856  | 0,009996332 down | -4,2215304 COL9A1   | Homo sapiens collagen, type IX, alpha 1 (COL9A1), transcript variant 1, mRNA [NM_001851]                                      |
| A_23_P45786   | 0,010780422 down | -1,8327225 COL9A2   | Homo sapiens collagen, type IX, alpha 2 (COL9A2), mRNA [NM_001852]                                                            |
| A_33_P3294459 | 0,00420817 up    | 2,0978785 COPG2IT1  | Homo sapiens cDNA FLJ41646 fis, clone FEBRA2024019. [AK123640]                                                                |
| A_23_P79725   | 0,02389704 up    | 1,5501678 COPS7B    | Homo sapiens COP9 signalosome subunit 7B (COPS7B), transcript variant 2, mRNA [NM_022730]                                     |
| A_23_P101093  | 6,34E-04 down    | -2,065991 COPZ2     | Homo sapiens coatomer protein complex, subunit zeta 2 (COPZ2), mRNA [NM_016429]                                               |
| A_23_P117694  | 0,001165197 down | -1,8303889 CORO2B   | Homo sapiens coronin, actin binding protein, 2B (CORO2B), transcript variant 1, mRNA [NM_006091]                              |
| A_23_P258164  | 3,44E-04 down    | -2,002615 CORT      | Homo sapiens cortistatin (CORT), mRNA [NM_001302]                                                                             |
| A_23_P55123   | 0,00783863 up    | 1,6106086 COX10     | Homo sapiens COX10 heme A:farnesyltransferase cytochrome c oxidase assembly factor (COX10), mRNA [NM_001303]                  |
| A_33_P3289113 | 0,03914508 down  | -1,5612668 COX11    | cytochrome c oxidase assembly homolog 11 (yeast) [Source:HGNC Symbol;Acc:HGNC:2261] [ENST00000572088]                         |
| A_33_P3279610 | 1,13E-05 down    | -7,1665487 COX6A2   | Homo sapiens cytochrome c oxidase subunit VIa polypeptide 2 (COX6A2), mRNA [NM_005205]                                        |
| A_23_P78571   | 0,001849674 down | -2,2612944 COX6B2   | Homo sapiens cytochrome c oxidase subunit VIb polypeptide 2 (testis) (COX6B2), mRNA [NM_144613]                               |
| A_23_P136246  | 0,010888245 up   | 2,2285357 COX7B2    | Homo sapiens cytochrome c oxidase subunit VIIb2 (COX7B2), mRNA [NM_130902]                                                    |
| A_23_P18017   | 0,03582283 down  | -1,8536375 CPA3     | Homo sapiens carboxypeptidase A3 (mast cell) (CPA3), mRNA [NM_001870]                                                         |
| A_23_P19754   | 9,44E-04 up      | 3,1427877 CPA4      | Homo sapiens carboxypeptidase A4 (CPA4), transcript variant 1, mRNA [NM_016352]                                               |
| A_24_P53282   | 0,003089754 up   | 1,6997094 CPD       | Homo sapiens carboxypeptidase D (CPD), transcript variant 1, mRNA [NM_001304]                                                 |
| A_33_P3284448 | 0,003018205 up   | 2,572973 CPBEB2-AS1 | Homo sapiens CPBEB2 antisense RNA 1 (head to head) (CPBEB2-AS1), long non-coding RNA [NR_038857]                              |
| A_24_P51909   | 0,013993435 down | -1,9890718 CPLX1    | Homo sapiens complexin 1 (CPLX1), mRNA [NM_006651]                                                                            |
| A_33_P3288135 | 0,037153814 down | -1,6413679 CPLX2    | complexin 2 [Source:HGNC Symbol;Acc:HGNC:2310] [ENST00000506642]                                                              |
| A_33_P3415300 | 2,02E-06 down    | -4,6049824 CPLX2    | Homo sapiens complexin 2 (CPLX2), transcript variant 1, mRNA [NM_006650]                                                      |
| A_24_P391868  | 0,021307105 up   | 2,8690038 CPLX2     | Homo sapiens complexin 2 (CPLX2), transcript variant 1, mRNA [NM_006650]                                                      |
| A_23_P98147   | 0,011320182 down | -1,5981624 CPN1     | Homo sapiens carboxypeptidase N, polypeptide 1 (CPN1), mRNA [NM_001308]                                                       |
| A_24_P137461  | 0,00256872 down  | -2,7807517 CPN2     | Homo sapiens carboxypeptidase N, polypeptide 2 (CPN2), transcript variant 1, mRNA [NM_001080513]                              |
| A_33_P3334688 | 0,020761188 up   | 1,9068142 CPNE2     | copine II [Source:HGNC Symbol;Acc:HGNC:2315] [ENST00000565951]                                                                |

|                |             |      |            |           |                                                                                                                            |
|----------------|-------------|------|------------|-----------|----------------------------------------------------------------------------------------------------------------------------|
| A_23_P360804   | 0,003789434 | down | -2,440039  | CPNE5     | Homo sapiens copine V (CPNE5), mRNA [NM_020939]                                                                            |
| A_33_P3262191  | 0,00115283  | up   | 2,401006   | CPNE7     | Homo sapiens copine VII (CPNE7), transcript variant 2, mRNA [NM_014427]                                                    |
| A_24_P56240    | 0,018007193 | up   | 1,6318351  | CPNE8     | Homo sapiens copine VIII (CPNE8), mRNA [NM_153634]                                                                         |
| A_23_P16694    | 0,018302524 | down | -1,5629363 | CPS1-IT1  | Homo sapiens CPS1 intronic transcript 1 (non-protein coding) (CPS1-IT1), long non-coding RNA [NR_002763]                   |
| A_24_P225518   | 0,03812364  | down | -1,5799567 | CPTP      | Homo sapiens ceramide-1-phosphate transfer protein (CPTP), mRNA [NM_001029885]                                             |
| A_23_P6066     | 3,63E-05    | down | -3,599711  | CPXM1     | Homo sapiens carboxypeptidase X (M14 family), member 1 (CPXM1), transcript variant 1, mRNA [NM_019609]                     |
| A_23_P256821   | 0,019834466 | up   | 1,7066884  | CR1       | Homo sapiens complement component (3b/4b) receptor 1 (Knops blood group) (CR1), transcript variant S, mRNA [NM_000651]     |
| A_33_P3303697  | 0,004147958 | up   | 1,5217868  | CR2       | Homo sapiens complement component (3d/Epstein Barr virus) receptor 2 (CR2), transcript variant 1, mRNA [NM_001006658]      |
| A_33_P3314151  | 0,001233501 | down | -2,0131567 | CRACR2A   | Homo sapiens calcium release activated channel regulator 2A (CRACR2A), transcript variant 1, mRNA [NM_001144958]           |
| A_23_P432545   | 0,002512852 | down | -2,0230112 | CRACR2B   | Homo sapiens calcium release activated channel regulator 2B (CRACR2B), transcript variant 2, mRNA [NM_173584]              |
| A_23_P12357    | 0,002369137 | up   | 1,6480929  | CRB1      | Homo sapiens crumbs family member 1, photoreceptor morphogenesis associated (CRB1), transcript variant 1, mRNA [NM_201253] |
| A_24_P916656   | 1,84E-06    | up   | 3,7066298  | CRCP      | Homo sapiens CGRP receptor component (CRCP), transcript variant 1, mRNA [NM_014478]                                        |
| A_21_P0013318  | 0,01183599  | up   | 1,5585951  | CRCP      | Homo sapiens CGRP receptor component (CRCP), transcript variant 4, mRNA [NM_001142414]                                     |
| A_23_P79231    | 8,34E-05    | up   | 2,0454664  | CREB1     | Homo sapiens cAMP responsive element binding protein 1 (CREB1), transcript variant B, mRNA [NM_134442]                     |
| A_23_P150407   | 0,004115873 | down | -1,6781266 | CREB3L1   | Homo sapiens cAMP responsive element binding protein 3-like 1 (CREB3L1), mRNA [NM_052854]                                  |
| A_23_P108082   | 0,035483632 | up   | 2,2954984  | CREB3L3   | Homo sapiens cAMP responsive element binding protein 3-like 3 (CREB3L3), transcript variant 1, mRNA [NM_032607]            |
| A_33_P3240229  | 0,002460218 | up   | 1,505764   | CREBBP    | Homo sapiens CREB binding protein (CREBBP), transcript variant 1, mRNA [NM_004380]                                         |
| A_23_P404606   | 0,0161229   | up   | 1,5361679  | CREBRF    | Homo sapiens CREB3 regulatory factor (CREBRF), transcript variant 1, mRNA [NM_153607]                                      |
| A_23_P203645   | 6,03E-04    | up   | 1,7799864  | CREBZF    | Homo sapiens CREB/ATF bZIP transcription factor (CREBZF), transcript variant 1, mRNA [NM_001039618]                        |
| A_23_P33465    | 0,02989304  | down | -1,9775258 | CRELD2    | Homo sapiens cysteine-rich with EGF-like domains 2 (CRELD2), transcript variant 2, mRNA [NM_024324]                        |
| A_21_P0004513  | 0,010518785 | up   | 2,5552926  | CRHBP     | corticotropin releasing hormone binding protein [Source:HGNC Symbol;Acc:HGNC:2356] [ENST00000514258]                       |
| A_33_P3354965  | 1,41E-05    | down | -4,3568997 | CRIP1     | Homo sapiens cysteine-rich protein 1 (intestinal) [Source:HGNC Symbol;Acc:HGNC:2360] [ENST00000330233]                     |
| A_23_P44674    | 0,00833867  | down | -1,5923656 | CRIP1     | Homo sapiens cysteine-rich protein 1 (intestinal) (CRIP1), mRNA [NM_001311]                                                |
| A_33_P3325404  | 1,25E-04    | down | -3,2360277 | CRIP3     | Homo sapiens cysteine-rich protein 3 (CRIP3), mRNA [NM_206922]                                                             |
| A_23_P133722   | 0,012978573 | up   | 1,578372   | CRISP1    | Homo sapiens cysteine-rich secretory protein 1 (CRISP1), transcript variant 1, mRNA [NM_0011131]                           |
| A_33_P3359943  | 0,002260854 | up   | 1,7673469  | CRISP2    | cysteine-rich secretory protein 2 [Source:HGNC Symbol;Acc:HGNC:12024] [ENST00000618917]                                    |
| A_24_P270814   | 0,001086293 | up   | 1,7294685  | CRK       | Homo sapiens v-crk avian sarcoma virus CT10 oncogene homolog (CRK), transcript variant II, mRNA [NM_016823]                |
| A_33_P3298139  | 2,22E-04    | down | -3,0805817 | CRLF2     | Homo sapiens cytokine receptor-like factor 2 (CRLF2), transcript variant 1, mRNA [NM_022148]                               |
| A_23_P113237   | 2,37E-06    | down | -2,9314392 | CRLF2     | Homo sapiens cytokine receptor-like factor 2 (CRLF2), transcript variant 2, mRNA [NM_001012288]                            |
| A_32_P149546   | 0,03569096  | up   | 1,6532187  | CROCC     | Homo sapiens ciliary rootlet coiled-coil, rootletin (CROCC), mRNA [NM_014675]                                              |
| A_32_P384562   | 0,029093489 | up   | 2,2857208  | CROCCP3   | Homo sapiens ciliary rootlet coiled-coil, rootletin pseudogene 3 (CROCCP3), non-coding RNA [NR_023386]                     |
| A_33_P3331882  | 0,005035898 | down | -1,8579845 | CRTC1     | Homo sapiens CREB regulated transcription coactivator 1 (CRTC1), transcript variant 3, mRNA [NM_001098482]                 |
| A_33_P3420204  | 0,024275467 | up   | 1,5119295  | CRTC1     | Homo sapiens CREB regulated transcription coactivator 1 (CRTC1), transcript variant 3, mRNA [NM_001098482]                 |
| A_33_P3370707  | 0,022243343 | down | -2,0506284 | CRX       | Homo sapiens cone-rod homeobox (CRX), mRNA [NM_000554]                                                                     |
| A_24_P407235   | 0,00270968  | up   | 1,7429675  | CRY1      | Homo sapiens cryptochrome circadian clock 1 (CRY1), mRNA [NM_004075]                                                       |
| A_23_P132147   | 0,021310885 | up   | 1,6263691  | CRYAA     | Homo sapiens crystallin, alpha A (CRYAA), mRNA [NM_000394]                                                                 |
| A_23_P4254     | 0,0174314   | up   | 2,266853   | CRYBA1    | Homo sapiens crystallin, beta A1 (CRYBA1), mRNA [NM_005208]                                                                |
| A_23_P103034   | 0,043820303 | up   | 1,510905   | CRYBA4    | Homo sapiens crystallin, beta A4 (CRYBA4), mRNA [NM_001886]                                                                |
| A_19_P00321202 | 0,006751498 | down | -1,5842283 | CRYBG3    | Homo sapiens beta-gamma crystallin domain containing 3 (CRYBG3), mRNA [NM_153605]                                          |
| A_23_P165380   | 0,002211608 | down | -2,2930126 | CRYGA     | Homo sapiens crystallin, gamma A (CRYGA), mRNA [NM_014617]                                                                 |
| A_23_P414842   | 0,004491135 | up   | 1,5110959  | CRYGB     | Homo sapiens crystallin, gamma B (CRYGB), mRNA [NM_005210]                                                                 |
| A_33_P3461948  | 0,003799858 | down | -3,7659984 | CRYGN     | Homo sapiens crystallin, gamma N (CRYGN), mRNA [NM_144727]                                                                 |
| A_23_P132738   | 0,041580934 | up   | 1,5530294  | CRYGS     | Homo sapiens crystallin, gamma S (CRYGS), mRNA [NM_017541]                                                                 |
| A_33_P3354940  | 0,018383762 | down | -1,6621056 | CSF1      | Homo sapiens colony stimulating factor 1 (macrophage) (CSF1), transcript variant 1, mRNA [NM_000757]                       |
| A_33_P3222424  | 0,016774347 | up   | 1,8983201  | CSF3      | Homo sapiens colony stimulating factor 3 (granulocyte) (CSF3), transcript variant 1, mRNA [NM_000759]                      |
| A_23_P381351   | 0,03866832  | down | -1,9257097 | CSH1      | Homo sapiens chorionic somatomammotropin hormone 1 (placental lactogen) (CSH1), mRNA [NM_001317]                           |
| A_23_P207174   | 9,76E-05    | down | -1,8567106 | CSH2      | Homo sapiens chorionic somatomammotropin hormone 2 (CSH2), transcript variant 2, mRNA [NM_022644]                          |
| A_33_P3230239  | 0,002314063 | up   | 1,7356757  | CSMD1     | Homo sapiens CUB and Sushi multiple domains 1 (CSMD1), mRNA [NM_033225]                                                    |
| A_23_P110234   | 0,00987252  | down | -1,6113873 | CSN1S1    | Homo sapiens casein alpha s1 (CSN1S1), transcript variant 1, mRNA [NM_001890]                                              |
| A_23_P252882   | 0,004350505 | up   | 2,8656228  | CSN3      | Homo sapiens casein kappa (CSN3), mRNA [NM_005212]                                                                         |
| A_24_P338788   | 9,53E-04    | down | -3,3007724 | CSNK1A1L  | Homo sapiens casein kinase 1, alpha 1-like (CSNK1A1L), mRNA [NM_145203]                                                    |
| A_33_P3324765  | 0,003004634 | up   | 1,669857   | CSNK1D    | Homo sapiens casein kinase 1, delta (CSNK1D), transcript variant 1, mRNA [NM_001893]                                       |
| A_24_P234792   | 5,73E-04    | up   | 1,6014132  | CSNK1G3   | Homo sapiens casein kinase 1, gamma 3 (CSNK1G3), transcript variant 4, mRNA [NM_001044723]                                 |
| A_23_P502575   | 9,75E-04    | down | -1,7419225 | CSNK2A1   | Homo sapiens casein kinase 2, alpha 1 polypeptide (CSNK2A1), transcript variant 1, mRNA [NM_177559]                        |
| A_21_P0011330  | 2,67E-04    | down | -2,354427  | CSPG4     | Homo sapiens chondroitin sulfate proteoglycan 4 (CSPG4), mRNA [NM_001897]                                                  |
| A_23_P71537    | 3,15E-04    | up   | 2,0833828  | CSPP1     | Homo sapiens centrosome and spindle pole associated protein 1 (CSPP1), transcript variant 2, mRNA [NM_001291339]           |
| A_23_P121011   | 0,010259474 | up   | 1,9384537  | CSRNP1    | Homo sapiens cysteine-serine-rich nuclear protein 1 (CSRNP1), mRNA [NM_033027]                                             |
| A_33_P3224070  | 0,042454362 | up   | 1,6007551  | CSRNP1    | Homo sapiens cysteine-serine-rich nuclear protein 1 (CSRNP1), mRNA [NM_033027]                                             |
| A_23_P151209   | 0,008302202 | up   | 1,5274146  | CSRNP2    | Homo sapiens cysteine-serine-rich nuclear protein 2 (CSRNP2), transcript variant 1, mRNA [NM_030809]                       |
| A_23_P143365   | 0,004069459 | up   | 1,5013725  | CST9L     | Homo sapiens cystatin 9-like (CST9L), mRNA [NM_080610]                                                                     |
| A_33_P3311621  | 0,011371057 | down | -2,1211188 | CSTF3-AS1 | Homo sapiens CSTF3 antisense RNA 1 (head to head) (CSTF3-AS1), long non-coding RNA [NR_034027]                             |

|                |             |      |            |               |                                                                                                                                             |
|----------------|-------------|------|------------|---------------|---------------------------------------------------------------------------------------------------------------------------------------------|
| A_23_P210807   | 9,77E-04    | down | -2,4248476 | CSTL1         | Homo sapiens cystatin-like 1 (CSTL1), mRNA [NM_138283]                                                                                      |
| A_32_P207124   | 1,67E-04    | down | -2,0936832 | CT47A11       | Homo sapiens cancer/testis antigen family 47, member A11 (CT47A11), mRNA [NM_173571]                                                        |
| A_33_P3247165  | 0,012858363 | up   | 2,6368213  | CT62          | Homo sapiens cancer/testis antigen 62 (CT62), mRNA [NM_001102658]                                                                           |
| A_33_P3318343  | 2,80E-05    | down | -3,1020103 | CTAG2         | Homo sapiens cancer/testis antigen 2 (CTAG2), transcript variant 2, mRNA [NM_020994]                                                        |
| A_23_P402952   | 0,038284265 | up   | 1,5308574  | CTAGE15       | Homo sapiens CTAGE family, member 15 (CTAGE15), mRNA [NM_001008747]                                                                         |
| A_23_P41292    | 4,19E-04    | up   | 1,6454359  | CTBP1         | Homo sapiens C-terminal binding protein 1 (CTBP1), transcript variant 2, mRNA [NM_001012614]                                                |
| A_19_P00319655 | 0,009483689 | down | -2,103435  | CTD-3080P12.3 | Homo sapiens uncharacterized LOC101928857 (CTD-3080P12.3), long non-coding RNA [NR_109911]                                                  |
| A_19_P00318243 | 0,001164722 | down | -1,6152066 | CTD-3080P12.3 | Homo sapiens uncharacterized LOC101928857 (CTD-3080P12.3), long non-coding RNA [NR_109911]                                                  |
| A_19_P00317835 | 9,74E-04    | down | -2,428418  | CTD-3080P12.3 | Homo sapiens uncharacterized LOC101928857 (CTD-3080P12.3), long non-coding RNA [NR_109911]                                                  |
| A_24_P142473   | 0,006302226 | up   | 1,5723447  | CTDNEP1       | Homo sapiens CTD nuclear envelope phosphatase 1 (CTDNEP1), transcript variant 1, mRNA [NM_015343]                                           |
| A_23_P110624   | 1,40E-05    | down | -2,704117  | CTNND2        | Homo sapiens catenin (cadherin-associated protein), delta 2 (CTNND2), transcript variant 1, mRNA [NM_001332]                                |
| A_33_P3254331  | 0,029978069 | up   | 1,7602673  | CTRC          | Homo sapiens chymotrypsin C (caldecrin) (CTRC), mRNA [NM_007272]                                                                            |
| A_23_P10291    | 4,25E-05    | down | -2,1754255 | CTSE          | Homo sapiens cathepsin E (CTSE), transcript variant 1, mRNA [NM_001910]                                                                     |
| A_23_P140384   | 0,006731194 | down | -2,4162056 | CTSG          | Homo sapiens cathepsin G (CTSG), mRNA [NM_001911]                                                                                           |
| A_23_P40240    | 0,007260038 | up   | 2,5232852  | CTSZ          | Homo sapiens cathepsin Z (CTSZ), mRNA [NM_001336]                                                                                           |
| A_33_P3219939  | 0,029734585 | up   | 1,6534452  | CUBN          | Homo sapiens cubilin (intrinsic factor-cobalamin receptor) (CUBN), mRNA [NM_001081]                                                         |
| A_24_P252794   | 0,006025991 | up   | 1,5586597  | CUL2          | Homo sapiens cullin 2 (CUL2), transcript variant 3, mRNA [NM_003591]                                                                        |
| A_23_P148463   | 0,001255646 | up   | 1,758439   | CUL4B         | Homo sapiens cullin 4B (CUL4B), transcript variant 1, mRNA [NM_003588]                                                                      |
| A_24_P220454   | 0,002197961 | up   | 1,6262196  | CUX1          | Homo sapiens cut-like homeobox 1 (CUX1), transcript variant 1, mRNA [NM_181552]                                                             |
| A_23_P2543     | 0,013578005 | up   | 4,612537   | CUX2          | Homo sapiens cut-like homeobox 2 (CUX2), mRNA [NM_015267]                                                                                   |
| A_24_P374943   | 0,004246139 | down | -1,5352498 | CXADR         | Homo sapiens coxsackie virus and adenovirus receptor (CXADR), transcript variant 1, mRNA [NM_001338]                                        |
| A_33_P3330264  | 0,017882597 | down | -1,9021653 | CXCL1         | Homo sapiens chemokine (C-X-C motif) ligand 1 (melanoma growth stimulating activity, alpha) (CXCL1), transcript variant 1, mRNA [NM_001511] |
| A_23_P202448   | 0,012672961 | down | -1,5311905 | CXCL12        | Homo sapiens chemokine (C-X-C motif) ligand 12 (CXCL12), transcript variant 1, mRNA [NM_199168]                                             |
| A_33_P3712341  | 0,004769301 | down | -2,1816678 | CXCL12        | Homo sapiens chemokine (C-X-C motif) ligand 12 (CXCL12), transcript variant 3, mRNA [NM_001033886]                                          |
| A_33_P3375859  | 0,007276913 | up   | 1,5187298  | CXCR2P1       | Homo sapiens chemokine (C-X-C motif) receptor 2 pseudogene 1 (CXCR2P1), non-coding RNA [NR_002712]                                          |
| A_23_P114299   | 0,024957158 | down | -1,5800143 | CXCR3         | Homo sapiens chemokine (C-X-C motif) receptor 3 (CXCR3), transcript variant 1, mRNA [NM_001504]                                             |
| A_23_P102000   | 0,006605382 | up   | 2,2860897  | CXCR4         | Homo sapiens chemokine (C-X-C motif) receptor 4 (CXCR4), transcript variant 1, mRNA [NM_001008540]                                          |
| A_23_P109913   | 0,017001104 | up   | 1,6446344  | CXCR6         | Homo sapiens chemokine (C-X-C motif) receptor 6 (CXCR6), mRNA [NM_006564]                                                                   |
| A_33_P3293925  | 4,97E-04    | down | -2,2571478 | CXorf36       | Homo sapiens chromosome X open reading frame 36 (CXorf36), transcript variant 1, mRNA [NM_176819]                                           |
| A_24_P36745    | 0,004067759 | up   | 1,6072811  | CXorf38       | Homo sapiens chromosome X open reading frame 38 (CXorf38), mRNA [NM_144970]                                                                 |
| A_33_P3650224  | 0,008596472 | down | -1,6693398 | CXorf49B      | Homo sapiens chromosome X open reading frame 49B (CXorf49B), mRNA [NM_001145139]                                                            |
| A_33_P3209170  | 0,005274218 | up   | 1,5505161  | CXorf51A      | Homo sapiens chromosome X open reading frame 51A (CXorf51A), mRNA [NM_001144064]                                                            |
| A_23_P413157   | 0,030987509 | up   | 1,6192452  | CXorf58       | Homo sapiens chromosome X open reading frame 58 (CXorf58), transcript variant 1, mRNA [NM_152761]                                           |
| A_33_P3255324  | 0,017143449 | up   | 1,5634949  | CXXC1P1       | Homo sapiens CXXC finger protein 1 pseudogene 1 (CXXC1P1), non-coding RNA [NR_033924]                                                       |
| A_33_P3388564  | 0,002705569 | down | -1,6247121 | CYB5D1        | Homo sapiens cytochrome b5 domain containing 1 (CYB5D1), mRNA [NM_144607]                                                                   |
| A_33_P3316686  | 1,49E-04    | down | -1,8561141 | CYB5R4        | Homo sapiens cytochrome b5 reductase 4 (CYB5R4), mRNA [NM_016230]                                                                           |
| A_24_P365767   | 0,03592154  | down | -1,7528096 | CYBB          | Homo sapiens cytochrome b-245, beta polypeptide (CYBB), mRNA [NM_000397]                                                                    |
| A_23_P167509   | 0,021687586 | down | -2,0427537 | CYFIP2        | Homo sapiens cytoplasmic FMR1 interacting protein 2 (CYFIP2), transcript variant 3, mRNA [NM_014376]                                        |
| A_33_P3285868  | 1,40E-05    | down | -3,9301143 | CYGB          | Homo sapiens cytoglobin (CYGB), mRNA [NM_134268]                                                                                            |
| A_24_P158285   | 0,046856362 | up   | 2,0379727  | CYLC2         | cylicin, basic protein of sperm head cytoskeleton 2 [Source:HGNC Symbol;Acc:HGNC:2583] [ENST00000612124]                                    |
| A_23_P129169   | 0,0026079   | down | -2,9085817 | CYP11A1       | Homo sapiens cytochrome P450, family 11, subfamily A, polypeptide 1 (CYP11A1), transcript variant 1, mRNA [NM_000781]                       |
| A_23_P215997   | 0,048540805 | up   | 1,7009579  | CYP11B2       | Homo sapiens cytochrome P450, family 11, subfamily B, polypeptide 2 (CYP11B2), mRNA [NM_000498]                                             |
| A_33_P3376478  | 0,007228423 | down | -2,1758037 | CYP17A1       | Homo sapiens cytochrome P450, family 17, subfamily A, polypeptide 1 (CYP17A1), mRNA [NM_000102]                                             |
| A_19_P00316135 | 0,007894971 | up   | 1,643985   | CYP1B1-AS1    | Homo sapiens CYP1B1 antisense RNA 1 (CYP1B1-AS1), long non-coding RNA [NR_027252]                                                           |
| A_33_P3411279  | 0,014393191 | down | -1,7415445 | CYP21A2       | Homo sapiens cytochrome P450, family 21, subfamily A, polypeptide 2 (CYP21A2), transcript variant 2, mRNA [NM_001128590]                    |
| A_23_P210109   | 0,014521415 | up   | 1,878929   | CYP26B1       | Homo sapiens cytochrome P450, family 26, subfamily B, polypeptide 1 (CYP26B1), transcript variant 1, mRNA [NM_019885]                       |
| A_33_P3264667  | 1,72E-04    | down | -3,784117  | CYP26C1       | Homo sapiens cytochrome P450, family 26, subfamily C, polypeptide 1 (CYP26C1), mRNA [NM_183374]                                             |
| A_23_P36397    | 0,012570703 | up   | 2,182729   | CYP27B1       | Homo sapiens cytochrome P450, family 27, subfamily B, polypeptide 1 (CYP27B1), mRNA [NM_000785]                                             |
| A_23_P55779    | 0,009765516 | down | -1,7268119 | CYP2A13       | Homo sapiens cytochrome P450, family 2, subfamily A, polypeptide 13 (CYP2A13), mRNA [NM_000766]                                             |
| A_23_P208373   | 0,003408433 | down | -1,9334961 | CYP2B6        | Homo sapiens cytochrome P450, family 2, subfamily B, polypeptide 6 (CYP2B6), mRNA [NM_000767]                                               |
| A_24_P394940   | 0,030274356 | up   | 2,3021047  | CYP2E1        | Homo sapiens cytochrome P450, family 2, subfamily E, polypeptide 1 (CYP2E1), mRNA [NM_000773]                                               |
| A_21_P0014273  | 0,039196245 | down | -1,6374826 | CYP2R1        | cytochrome P450, family 2, subfamily R, polypeptide 1 [Source:HGNC Symbol;Acc:HGNC:20580] [ENST00000532805]                                 |
| A_24_P191013   | 5,27E-04    | down | -2,3335712 | CYP4A11       | Homo sapiens cytochrome P450, family 4, subfamily A, polypeptide 11 (CYP4A11), mRNA [NM_000778]                                             |
| A_33_P3303474  | 6,19E-04    | down | -2,9305618 | CYP4A11       | Homo sapiens cytochrome P450, family 4, subfamily A, polypeptide 11 (CYP4A11), mRNA [NM_000778]                                             |
| A_33_P3382471  | 0,04377312  | down | -1,8437686 | CYP4A22       | Homo sapiens cytochrome P450, family 4, subfamily A, polypeptide 22 (CYP4A22), mRNA [NM_001010969]                                          |
| A_21_P0000967  | 0,01111107  | up   | 1,7298989  | CYP4B1        | cytochrome P450, family 4, subfamily B, polypeptide 1 [Source:HGNC Symbol;Acc:HGNC:2644] [ENST00000546128]                                  |
| A_21_P0011168  | 0,013058359 | down | -2,217668  | CYP4F35P      | Homo sapiens cytochrome P450, family 4, subfamily F, polypeptide 35, pseudogene (CYP4F35P), non-coding RNA [NR_026756]                      |
| A_24_P28811    | 0,004201054 | down | -2,5955667 | CYP4F62P      | Homo sapiens cytochrome P450, family 4, subfamily F, polypeptide 62, pseudogene (CYP4F62P), non-coding RNA [NR_103761]                      |
| A_23_P131060   | 3,88E-04    | down | -2,656675  | CYP4F8        | Homo sapiens cytochrome P450, family 4, subfamily F, polypeptide 8 (CYP4F8), mRNA [NM_007253]                                               |
| A_24_P293530   | 0,026695231 | up   | 2,3638124  | CYP4X1        | Homo sapiens cytochrome P450, family 4, subfamily X, polypeptide 1 (CYP4X1), mRNA [NM_178033]                                               |
| A_21_P0010756  | 0,0263843   | up   | 2,1172006  | CYP4Z1        | Homo sapiens cytochrome P450, family 4, subfamily Z, polypeptide 1 (CYP4Z1), mRNA [NM_178134]                                               |

|               |                  |                       |                                                                                                                                |
|---------------|------------------|-----------------------|--------------------------------------------------------------------------------------------------------------------------------|
| A_33_P3873533 | 0,005243063 up   | 1,5229244 CYP51A1-AS1 | Homo sapiens CYP51A1 antisense RNA 1 (CYP51A1-AS1), transcript variant 1, long non-coding RNA [NR_122109]                      |
| A_23_P146198  | 0,009408837 down | -1,964436 CYP7A1      | Homo sapiens cytochrome P450, family 7, subfamily A, polypeptide 1 (CYP7A1), mRNA [NM_000780]                                  |
| A_23_P169092  | 0,03852742 down  | -1,9439952 CYP7B1     | Homo sapiens cytochrome P450, family 7, subfamily B, polypeptide 1 (CYP7B1), mRNA [NM_004820]                                  |
| A_24_P208704  | 0,004966459 up   | 1,5003439 CYP8B1      | Homo sapiens cytochrome P450, family 8, subfamily B, polypeptide 1 (CYP8B1), mRNA [NM_004391]                                  |
| A_23_P83781   | 6,53E-04 up      | 1,6800588 CYTH1       | Homo sapiens cytohesin 1 (CYTH1), transcript variant 1, mRNA [NM_004762]                                                       |
| A_33_P3762733 | 9,65E-04 down    | -1,9852363 D21S2088E  | Homo sapiens D21S2088E (D21S2088E), long non-coding RNA [NR_040254]                                                            |
| A_21_P0010273 | 0,006046833 down | -2,4261594 D21S2088E  | Homo sapiens D21S2088E (D21S2088E), long non-coding RNA [NR_040254]                                                            |
| A_33_P3355296 | 0,003476603 down | -1,6510508 D2HGDH     | D-2-hydroxyglutarate dehydrogenase [Source:HGNC Symbol;Acc:HGNC:28358] [ENST00000467427]                                       |
| A_33_P3288104 | 6,03E-06 down    | -3,9056752 DAAM2      | dishevelled associated activator of morphogenesis 2 [Source:HGNC Symbol;Acc:HGNC:18143] [ENST00000405961]                      |
| A_32_P52785   | 7,74E-04 down    | -3,3082118 DAAM2      | Homo sapiens dishevelled associated activator of morphogenesis 2 (DAAM2), transcript variant 2, mRNA [NM_015345]               |
| A_23_P23850   | 0,001730926 down | -2,1302145 DAB1       | Homo sapiens Dab, reelin signal transducer, homolog 1 (Drosophila) (DAB1), mRNA [NM_021080]                                    |
| A_33_P3375334 | 0,004435388 up   | 1,6764264 DAB1        | Dab, reelin signal transducer, homolog 1 (Drosophila) [Source:HGNC Symbol;Acc:HGNC:2661] [ENST00000371230]                     |
| A_23_P123848  | 0,007713168 up   | 1,7693135 DAB2IP      | Homo sapiens DAB2 interacting protein (DAB2IP), transcript variant 1, mRNA [NM_032552]                                         |
| A_24_P289260  | 0,005719409 up   | 2,305007 DACT2        | Homo sapiens dishevelled-binding antagonist of beta-catenin 2 (DACT2), transcript variant 1, mRNA [NM_214462]                  |
| A_24_P225961  | 0,007524025 up   | 1,5787312 DAG1        | Homo sapiens dystroglycan 1 (dystrophin-associated glycoprotein 1) (DAG1), transcript variant 2, mRNA [NM_004393]              |
| A_24_P115967  | 0,002508643 up   | 1,8557249 DAGLA       | Homo sapiens diacylglycerol lipase, alpha (DAGLA), mRNA [NM_006133]                                                            |
| A_24_P902052  | 0,00250415 up    | 1,7481979 DANCR       | Homo sapiens differentiation antagonizing non-protein coding RNA (DANCR), long non-coding RNA [NR_024031]                      |
| A_23_P435636  | 0,006239211 up   | 1,8311049 DAND5       | Homo sapiens DAN domain family member 5, BMP antagonist (DAND5), mRNA [NM_152654]                                              |
| A_24_P10233   | 6,09E-04 up      | 3,2715988 DAPK2       | Homo sapiens death-associated protein kinase 2 (DAPK2), mRNA [NM_014326]                                                       |
| A_23_P148984  | 5,67E-05 up      | 1,8133062 DARS2       | Homo sapiens aspartyl-tRNA synthetase 2, mitochondrial (DARS2), mRNA [NM_018122]                                               |
| A_23_P28466   | 0,033617917 up   | 2,3074393 DAW1        | Homo sapiens dynein assembly factor with WDR repeat domains 1 (DAW1), mRNA [NM_178821]                                         |
| A_33_P3682006 | 0,023167709 down | -2,5146136 DBH-AS1    | Homo sapiens DBH antisense RNA 1 (DBH-AS1), long non-coding RNA [NR_102735]                                                    |
| A_23_P351535  | 0,023917466 up   | 2,0434322 DBIL5P      | Homo sapiens diazepam binding inhibitor-like 5, pseudogene (DBIL5P), non-coding RNA [NR_024120]                                |
| A_33_P3291594 | 0,03220782 up    | 2,0969286 DBT         | dihydroilpoamide branched chain transacylase E2 [Source:HGNC Symbol;Acc:HGNC:2698] [ENST00000370131]                           |
| A_33_P3407350 | 0,001919191 up   | 4,610509 DBX1         | Homo sapiens developing brain homeobox 1 (DBX1), mRNA [NM_001029865]                                                           |
| A_33_P3309999 | 0,002543547 down | -4,4681644 DCAF12L2   | Homo sapiens DDB1 and CUL4 associated factor 12-like 2 (DCAF12L2), mRNA [NM_001013628]                                         |
| A_33_P3327290 | 0,016412854 up   | 1,576158 DCAF4L1      | Homo sapiens DDB1 and CUL4 associated factor 4-like 1 (DCAF4L1), mRNA [NM_001029955]                                           |
| A_33_P3768992 | 0,008012371 down | -2,7903297 DCAF4L2    | Homo sapiens DDB1 and CUL4 associated factor 4-like 2 (DCAF4L2), mRNA [NM_152418]                                              |
| A_21_P0014056 | 0,008895797 down | -2,3837156 DCAF8      | DDB1 and CUL4 associated factor 8 [Source:HGNC Symbol;Acc:HGNC:24891] [ENST00000481831]                                        |
| A_33_P3250740 | 0,023464588 up   | 2,0537393 DCAF8L1     | Homo sapiens DDB1 and CUL4 associated factor 8-like 1 (DCAF8L1), mRNA [NM_001017930]                                           |
| A_24_P58331   | 0,001359299 down | -1,7749751 DCAKD      | Homo sapiens dephospho-CoA kinase domain containing (DCAKD), transcript variant 1, mRNA [NM_024819]                            |
| A_33_P3246028 | 0,04465046 up    | 2,2831223 DCDC2B      | Homo sapiens doublecortin domain containing 2B (DCDC2B), mRNA [NM_001099434]                                                   |
| A_33_P3298226 | 0,021359531 up   | 2,4176476 DCHS2       | dachsous cadherin-related 2 [Source:HGNC Symbol;Acc:HGNC:23111] [ENST00000456341]                                              |
| A_24_P54131   | 0,039073016 up   | 1,5488048 DCLRE1B     | Homo sapiens DNA cross-link repair 1B (DCLRE1B), mRNA [NM_022836]                                                              |
| A_24_P886040  | 2,93E-04 up      | 1,8939086 DCP2        | Homo sapiens decapping mRNA 2 (DCP2), transcript variant 1, mRNA [NM_152624]                                                   |
| A_23_P314798  | 0,032032058 down | -1,6891665 DCST2      | Homo sapiens DC-STAMP domain containing 2 (DCST2), mRNA [NM_144622]                                                            |
| A_23_P76622   | 9,10E-04 down    | -5,0089407 DCT        | Homo sapiens dopachrome tautomerase (DCT), transcript variant 1, mRNA [NM_001922]                                              |
| A_33_P3406686 | 0,014732851 down | -1,7680238 DCTN1      | Homo sapiens dynactin 1 (DCTN1), transcript variant 7, non-coding RNA [NR_033935]                                              |
| A_32_P43812   | 0,0301917 up     | 1,5114195 DCUN1D4     | Homo sapiens DCN1, defective in cullin neddylation 1, domain containing 4 (DCUN1D4), transcript variant 1, mRNA [NM_001040402] |
| A_33_P3259878 | 0,001668798 down | -2,148791 DDB1        | damage-specific DNA binding protein 1, 127kDa [Source:HGNC Symbol;Acc:HGNC:2717] [ENST00000545894]                             |
| A_33_P3283038 | 0,002054396 up   | 1,640494 DDC-AS1      | Homo sapiens DDC antisense RNA 1 (DDC-AS1), long non-coding RNA [NR_033845]                                                    |
| A_21_P0000039 | 0,027385073 up   | 1,6010927 DDHD2       | Homo sapiens DDHD domain containing 2 (DDHD2), transcript variant 3, mRNA [NM_001164234]                                       |
| A_32_P93149   | 0,009067026 down | -1,9642712 DDX10      | Homo sapiens DEAD (Asp-Glu-Ala-Asp) box polypeptide 10 (DDX10), mRNA [NM_004398]                                               |
| A_33_P3322307 | 0,04876158 up    | 1,6677231 DDX11       | Homo sapiens DEAD/H (Asp-Glu-Ala-Asp/His) box helicase 11 (DDX11), transcript variant 5, mRNA [NM_001257145]                   |
| A_32_P227317  | 0,007571008 down | -1,5109097 DDX11L2    | Homo sapiens DEAD/H (Asp-Glu-Ala-Asp/His) box helicase 11 like 2 (DDX11L2), transcript variant 1, non-coding RNA [NR_024004]   |
| A_23_P57534   | 0,02238735 up    | 1,6512882 DDX17       | Homo sapiens DEAD (Asp-Glu-Ala-Asp) box helicase 17 (DDX17), transcript variant 1, mRNA [NM_006386]                            |
| A_24_P512054  | 0,025132263 up   | 2,2537367 DDX50       | Homo sapiens DEAD (Asp-Glu-Ala-Asp) box polypeptide 50 (DDX50), mRNA [NM_024045]                                               |
| A_33_P3372874 | 0,003122786 up   | 1,511794 DDX53        | Homo sapiens DEAD (Asp-Glu-Ala-Asp) box polypeptide 53 (DDX53), mRNA [NM_182699]                                               |
| A_33_P3461258 | 0,01619388 up    | 2,8916602 DEFA11P     | Homo sapiens defensin, alpha 11 pseudogene (DEFA11P), non-coding RNA [NR_073421]                                               |
| A_23_P9018    | 9,17E-05 down    | -2,9044347 DEFB104B   | Homo sapiens defensin, beta 104B (DEFB104B), mRNA [NM_001040702]                                                               |
| A_33_P3265803 | 0,008213288 down | -1,50702 DEFB108B     | Homo sapiens defensin, beta 108B (DEFB108B), mRNA [NM_001002035]                                                               |
| A_33_P3412678 | 0,001509245 up   | 2,1219666 DEFB112     | Homo sapiens defensin, beta 112 (DEFB112), mRNA [NM_001037498]                                                                 |
| A_33_P3328352 | 0,042822607 up   | 2,0151548 DEFB115     | Homo sapiens defensin, beta 115 (DEFB115), mRNA [NM_001037730]                                                                 |
| A_23_P312285  | 4,23E-04 up      | 2,5822425 DEFB119     | Homo sapiens defensin, beta 119 (DEFB119), transcript variant 1, mRNA [NM_153289]                                              |
| A_33_P3305446 | 0,028459717 down | -1,8651847 DEFB121    | Homo sapiens defensin, beta 121 (DEFB121), transcript variant 1, mRNA [NM_001011878]                                           |
| A_33_P3316522 | 3,07E-04 down    | -2,4777787 DEFB124    | Homo sapiens defensin, beta 124 (DEFB124), mRNA [NM_001037500]                                                                 |
| A_33_P3272962 | 0,01496626 down  | -2,4502509 DEFB128    | Homo sapiens defensin, beta 128 (DEFB128), mRNA [NM_001037732]                                                                 |
| A_33_P3316475 | 3,44E-04 down    | -2,4996994 DEFB132    | Homo sapiens defensin, beta 132 (DEFB132), mRNA [NM_207469]                                                                    |
| A_23_P254702  | 0,016124837 up   | 1,5328605 DEK         | Homo sapiens DEK proto-oncogene (DEK), transcript variant 1, mRNA [NM_003472]                                                  |
| A_23_P320897  | 0,03877517 up    | 1,5515177 DENND1B     | Homo sapiens DENN/MADD domain containing 1B (DENND1B), transcript variant 3, mRNA [NM_001195215]                               |
| A_33_P3248629 | 0,017658008 down | -1,7057351 DENND2A    | DENN/MADD domain containing 2A [Source:HGNC Symbol;Acc:HGNC:22212] [ENST00000492720]                                           |

|                |             |      |            |               |                                                                                                                                              |
|----------------|-------------|------|------------|---------------|----------------------------------------------------------------------------------------------------------------------------------------------|
| A_33_P3321136  | 0,034672167 | down | -1,6051948 | DENND3        | Homo sapiens DENN/MADD domain containing 3 (DENND3), mRNA [NM_014957]                                                                        |
| A_33_P3321130  | 0,011235802 | up   | 2,3258991  | DENND3        | DENN/MADD domain containing 3 [Source:HGNC Symbol;Acc:HGNC:29134] [ENST00000520482]                                                          |
| A_32_P175301   | 0,04668635  | up   | 1,9659216  | DENND3        | Homo sapiens DENN/MADD domain containing 3 (DENND3), mRNA [NM_014957]                                                                        |
| A_23_P157726   | 0,00855777  | up   | 1,5042038  | DENND4C       | DENN/MADD domain containing 4C [Source:HGNC Symbol;Acc:HGNC:26079] [ENST00000380437]                                                         |
| A_24_P659036   | 1,89E-04    | down | -3,4460607 | DENND6B       | Homo sapiens DENN/MADD domain containing 6B (DENND6B), mRNA [NM_001001794]                                                                   |
| A_33_P3409672  | 0,005486531 | up   | 1,7143492  | DEPDC5        | Homo sapiens DEP domain containing 5 (DEPDC5), transcript variant 4, mRNA [NM_001242896]                                                     |
| A_33_P3724155  | 0,001755328 | down | -1,7662646 | DERL3         | Homo sapiens derlin 3 (DERL3), transcript variant 3, mRNA [NM_198440]                                                                        |
| A_33_P3275801  | 0,004862028 | down | -1,7054603 | DES           | Homo sapiens desmin (DES), mRNA [NM_001927]                                                                                                  |
| A_23_P44546    | 0,005835782 | up   | 2,0363755  | DFFB          | Homo sapiens DNA fragmentation factor, 40kDa, beta polypeptide (caspase-activated DNase) (DFFB), transcript variant 1, mRNA [NM_001282669]   |
| A_24_P125881   | 0,002112263 | up   | 1,5512819  | DGCR2         | Homo sapiens DiGeorge syndrome critical region gene 2 (DGCR2), transcript variant 1, mRNA [NM_005137]                                        |
| A_21_P0012310  | 0,023877386 | down | -1,6884927 | DGCR5         | Homo sapiens DiGeorge syndrome critical region gene 5 (non-protein coding) (DGCR5), transcript variant 3, non-coding RNA [NR_110533]         |
| A_33_P3263359  | 0,03161778  | down | -2,4003706 | DGKA          | diacylglycerol kinase, alpha 80kDa [Source:HGNC Symbol;Acc:HGNC:2849] [ENST00000546995]                                                      |
| A_33_P3421728  | 0,001897034 | down | -3,2951567 | DGKG          | Homo sapiens diacylglycerol kinase, gamma 90kDa (DGKG), transcript variant 1, mRNA [NM_001346]                                               |
| A_24_P343095   | 0,021350173 | down | -1,8172582 | DHFR          | Homo sapiens dihydrofolate reductase (DHFR), transcript variant 1, mRNA [NM_000791]                                                          |
| A_33_P3338740  | 0,013261414 | up   | 2,067898   | DHH           | Homo sapiens desert hedgehog (DHH), mRNA [NM_021044]                                                                                         |
| A_23_P33759    | 0,016533468 | up   | 1,9122171  | DHRS3         | Homo sapiens dehydrogenase/reductase (SDR family) member 3 (DHRS3), mRNA [NM_004753]                                                         |
| A_33_P3403459  | 0,008537592 | down | -1,5253488 | DHRS4-AS1     | Homo sapiens DHRS4 antisense RNA 1 (DHRS4-AS1), transcript variant 1, long non-coding RNA [NR_023921]                                        |
| A_23_P81463    | 0,006843912 | up   | 1,5645705  | DHX29         | Homo sapiens DEAH (Asp-Glu-Ala-His) box polypeptide 29 (DHX29), mRNA [NM_019030]                                                             |
| A_23_P47004    | 0,002685192 | up   | 1,641429   | DHX32         | Homo sapiens DEAH (Asp-Glu-Ala-His) box polypeptide 32 (DHX32), mRNA [NM_018180]                                                             |
| A_24_P364970   | 7,66E-04    | up   | 1,8028526  | DHX33         | Homo sapiens DEAH (Asp-Glu-Ala-His) box polypeptide 33 (DHX33), transcript variant 1, mRNA [NM_020162]                                       |
| A_23_P38011    | 0,007193404 | up   | 1,6014931  | DHX38         | Homo sapiens DEAH (Asp-Glu-Ala-His) box polypeptide 38 (DHX38), mRNA [NM_014003]                                                             |
| A_21_P0011150  | 0,001096528 | up   | 1,6416379  | DHX9          | Homo sapiens DEAH (Asp-Glu-Ala-His) box helicase 9 (DHX9), transcript variant 1, mRNA [NM_001357]                                            |
| A_33_P3330125  | 0,001311651 | down | -2,7022662 | DIABLO        | Homo sapiens diablo, IAP-binding mitochondrial protein (DIABLO), transcript variant 5, mRNA [NM_001278302]                                   |
| A_33_P3243683  | 0,013784593 | up   | 1,5663291  | DIAPH1        | Homo sapiens diaphanous-related formin 1 (DIAPH1), transcript variant 1, mRNA [NM_005219]                                                    |
| A_23_P395426   | 0,001265822 | up   | 1,6745187  | DIDO1         | Homo sapiens death inducer-obliterator 1 (DIDO1), transcript variant 1, mRNA [NM_022105]                                                     |
| A_24_P944144   | 0,004435291 | up   | 2,2270083  | DIDO1         | Homo sapiens death inducer-obliterator 1 (DIDO1), transcript variant 3, mRNA [NM_080797]                                                     |
| A_23_P34946    | 0,003886883 | up   | 1,5197195  | DIEXF         | Homo sapiens digestive organ expansion factor homolog (zebrafish) (DIEXF), mRNA [NM_014388]                                                  |
| A_33_P3325700  | 0,005312665 | up   | 1,6405076  | DIO2          | Homo sapiens deiodinase, iodothyronine, type II (DIO2), transcript variant 4, mRNA [NM_001242502]                                            |
| A_23_P401380   | 0,001001802 | up   | 1,8645418  | DIP2B         | Homo sapiens DIP2 disco-interacting protein 2 homolog B (Drosophila) (DIP2B), mRNA [NM_173602]                                               |
| A_33_P3238484  | 0,049390856 | down | -2,3921447 | DIP2C         | Homo sapiens DIP2 disco-interacting protein 2 homolog C (Drosophila) (DIP2C), mRNA [NM_014974]                                               |
| A_23_P131139   | 0,003401689 | down | -2,455574  | DIRC1         | Homo sapiens disrupted in renal carcinoma 1 (DIRC1), mRNA [NM_052952]                                                                        |
| A_33_P3234521  | 0,02290145  | down | -2,3625288 | DIS3L         | DIS3 like exosome 3'-5' exoribonuclease [Source:HGNC Symbol;Acc:HGNC:28698] [ENST00000564909]                                                |
| A_33_P3270203  | 5,77E-05    | down | -2,018802  | DIS3L2        | Homo sapiens DIS3 like 3'-5' exoribonuclease 2 (DIS3L2), transcript variant 2, mRNA [NM_001257281]                                           |
| A_33_P3270192  | 0,0024941   | up   | 1,5860902  | DIS3L2        | DIS3 like 3'-5' exoribonuclease 2 [Source:HGNC Symbol;Acc:HGNC:28648] [ENST00000409401]                                                      |
| A_33_P3400918  | 0,035515938 | down | -2,173556  | DISC1         | Homo sapiens disrupted in schizophrenia 1 (DISC1), transcript variant m, mRNA [NM_001164550]                                                 |
| A_24_P83787    | 0,001158951 | down | -1,9296458 | DISC1         | Homo sapiens disrupted in schizophrenia 1 (DISC1), transcript variant s, mRNA [NM_001012959]                                                 |
| A_21_P0000050  | 0,008982472 | up   | 2,19026    | DISC1         | Homo sapiens disrupted in schizophrenia 1 (DISC1), transcript variant l, mRNA [NM_001164549]                                                 |
| A_21_P0000049  | 0,036681984 | up   | 1,6988332  | DISC1         | Homo sapiens disrupted in schizophrenia 1 (DISC1), transcript variant b, mRNA [NM_001164538]                                                 |
| A_21_P0009654  | 0,008276031 | up   | 1,5006328  | DKFZp434J0226 | uncharacterized LOC93429 [Source:EntrezGene;Acc:93429] [ENST00000593980]                                                                     |
| A_21_P0005080  | 0,006843387 | up   | 1,6353315  | DKFZp451B082  | Homo sapiens uncharacterized LOC401282 (DKFZp451B082), long non-coding RNA [NR_033862]                                                       |
| A_33_P3567892  | 0,012691454 | up   | 2,2013688  | DKFZP547J0410 | Homo sapiens mRNA; cDNA DKFZp564J0482 (from clone DKFZp564J0482) [AL050263]                                                                  |
| A_23_P403398   | 0,012210114 | up   | 1,6544875  | DKFZP586I1420 | Homo sapiens uncharacterized protein DKFZp586I1420 (DKFZP586I1420), non-coding RNA [NR_002186]                                               |
| A_21_P0014245  | 0,001610669 | up   | 1,7190765  | DKFZp667F0711 | PREDICTED: Homo sapiens uncharacterized protein DKFZp667F0711 (DKFZp667F0711), misc_RNA [XR_247499]                                          |
| A_33_P3736195  | 0,006251018 | up   | 1,8365387  | DKFZp686M1136 | Homo sapiens mRNA; cDNA DKFZp686M1136 (from clone DKFZp686M1136) [BX647230]                                                                  |
| A_32_P189790   | 0,004931542 | down | -2,5081434 | DKFZp779M0652 | Homo sapiens uncharacterized DKFZp779M0652 (DKFZp779M0652), long non-coding RNA [NR_027134]                                                  |
| A_21_P0000139  | 8,21E-04    | down | -2,3586934 | DKKL1         | Homo sapiens dickkopf-like 1 (DKKL1), transcript variant 1, mRNA [NM_014419]                                                                 |
| A_23_P130743   | 0,019536445 | up   | 2,9366312  | DKKL1         | Homo sapiens dickkopf-like 1 (DKKL1), transcript variant 1, mRNA [NM_014419]                                                                 |
| A_19_P00321577 | 0,019539066 | down | -3,16847   | DLEU1         | Homo sapiens deleted in lymphocytic leukemia 1 (non-protein coding) (DLEU1), transcript variant 3, long non-coding RNA [NR_109974]           |
| A_33_P3329462  | 0,005266239 | down | -2,635833  | DLEU1-AS1     | Homo sapiens DLEU1 antisense RNA 1 (DLEU1-AS1), long non-coding RNA [NR_125753]                                                              |
| A_21_P0000753  | 0,005680444 | down | -1,6917849 | DLG1-AS1      | Homo sapiens DLG1 antisense RNA 1 (DLG1-AS1), long non-coding RNA [NR_038289]                                                                |
| A_32_P229618   | 0,008384389 | down | -2,4926064 | DLG2          | Homo sapiens discs, large homolog 2 (Drosophila) (DLG2), transcript variant 2, mRNA [NM_001364]                                              |
| A_24_P129632   | 0,002488149 | up   | 1,7774208  | DLG5          | Homo sapiens discs, large homolog 5 (Drosophila) (DLG5), mRNA [NM_004747]                                                                    |
| A_24_P62367    | 0,007281127 | up   | 1,5816133  | DLGAP1        | Homo sapiens discs, large (Drosophila) homolog-associated protein 1 (DLGAP1), transcript variant 1, mRNA [NM_004746]                         |
| A_33_P3368785  | 4,30E-04    | down | -1,6626756 | DLGAP1-AS1    | Homo sapiens DLGAP1 antisense RNA 1 (DLGAP1-AS1), long non-coding RNA [NR_024101]                                                            |
| A_33_P3511777  | 0,020363208 | down | -2,1924493 | DLGAP1-AS3    | Homo sapiens DLGAP1 antisense RNA 3 (DLGAP1-AS3), long non-coding RNA [NR_038895]                                                            |
| A_33_P3232557  | 0,003702205 | down | -1,5786244 | DLGAP3        | Homo sapiens discs, large (Drosophila) homolog-associated protein 3 (DLGAP3), mRNA [NM_001080418]                                            |
| A_23_P205697   | 3,54E-05    | up   | 2,1944447  | DLST          | Homo sapiens dihydrolipoamide S-succinyltransferase (E2 component of 2-oxo-glutarate complex) (DLST), transcript variant 1, mRNA [NM_001933] |
| A_23_P86599    | 0,012810119 | down | -1,5343366 | DMBT1         | Homo sapiens deleted in malignant brain tumors 1 (DMBT1), transcript variant 2, mRNA [NM_007329]                                             |
| A_23_P50535    | 0,002093551 | up   | 1,6997447  | DMPK          | Homo sapiens dystrophin myotonic-protein kinase (DMPK), transcript variant 2, mRNA [NM_004409]                                               |
| A_23_P169293   | 8,46E-05    | down | -3,0850255 | DMRT1         | Homo sapiens doublesex and mab-3 related transcription factor 1 (DMRT1), mRNA [NM_021951]                                                    |
| A_32_P213459   | 0,019670954 | down | -2,3889842 | DMRT2         | Homo sapiens doublesex and mab-3 related transcription factor 2 (DMRT2), transcript variant 1, mRNA [NM_006557]                              |

|               |                  |            |             |                                                                                                                       |
|---------------|------------------|------------|-------------|-----------------------------------------------------------------------------------------------------------------------|
| A_23_P8664    | 1,48E-04 up      | 2,0007913  | DMTF1       | Homo sapiens cyclin D binding myb-like transcription factor 1 (DMTF1), transcript variant 1, mRNA [NM_021145]         |
| A_23_P250571  | 0,001191842 up   | 1,6223614  | DMXL1       | Homo sapiens Dmx-like 1 (DMXL1), transcript variant 2, mRNA [NM_005509]                                               |
| A_23_P54612   | 0,04848233 up    | 1,7026728  | DNAAF1      | Homo sapiens dynein, axonemal, assembly factor 1 (DNAAF1), mRNA [NM_178452]                                           |
| A_33_P3379801 | 3,70E-06 down    | -2,5171723 | DNAAF2      | Homo sapiens dynein, axonemal, assembly factor 2 (DNAAF2), transcript variant 2, mRNA [NM_001083908]                  |
| A_23_P18213   | 0,030150713 up   | 1,5424603  | DNAH1       | Homo sapiens dynein, axonemal, heavy chain 1 (DNAH1), mRNA [NM_015512]                                                |
| A_32_P19806   | 0,003302187 up   | 2,409575   | DNAH11      | Homo sapiens dynein, axonemal, heavy chain 11 (DNAH11), mRNA [NM_001277115]                                           |
| A_33_P3422010 | 0,004826859 down | -1,7272685 | DNAH12      | Homo sapiens dynein, axonemal, heavy chain 12 (DNAH12), transcript variant 3, mRNA [NM_001291661]                     |
| A_24_P127691  | 0,023188455 down | -1,6056577 | DNAH14      | dynein, axonemal, heavy chain 14 [Source:HGNC Symbol;Acc:HGNC:2945] [ENST00000495456]                                 |
| A_32_P439662  | 0,006191589 down | -2,1076164 | DNAH17      | Homo sapiens dynein, axonemal, heavy chain 17 (DNAH17), mRNA [NM_173628]                                              |
| A_21_P0011612 | 0,012521409 down | -1,7481616 | DNAH17      | Homo sapiens dynein, axonemal, heavy chain 17 (DNAH17), mRNA [NM_173628]                                              |
| A_21_P0011611 | 0,015868079 down | -2,6220064 | DNAH17      | Homo sapiens dynein, axonemal, heavy chain 17 (DNAH17), mRNA [NM_173628]                                              |
| A_21_P0011629 | 0,03889971 down  | -2,205363  | DNAH17-AS1  | Homo sapiens DNAH17 antisense RNA 1 (DNAH17-AS1), long non-coding RNA [NR_102401]                                     |
| A_33_P3285629 | 0,040795118 down | -1,9019712 | DNAI2       | Homo sapiens dynein, axonemal, intermediate chain 2 (DNAI2), transcript variant 1, mRNA [NM_023036]                   |
| A_33_P3419239 | 0,007283832 up   | 2,2648532  | DNAI2       | Homo sapiens dynein, axonemal, intermediate chain 2 (DNAI2), transcript variant 1, mRNA [NM_023036]                   |
| A_23_P90062   | 0,020638434 up   | 1,5062263  | DNAJB1      | Homo sapiens DnaJ (Hsp40) homolog, subfamily B, member 1 (DNAJB1), transcript variant 1, mRNA [NM_006145]             |
| A_23_P215227  | 5,62E-05 up      | 2,568141   | DNAJB6      | Homo sapiens DnaJ (Hsp40) homolog, subfamily B, member 6 (DNAJB6), transcript variant 2, mRNA [NM_005494]             |
| A_23_P385063  | 7,80E-04 up      | 1,9519597  | DNAJB6      | Homo sapiens DnaJ (Hsp40) homolog, subfamily B, member 6 (DNAJB6), transcript variant 1, mRNA [NM_058246]             |
| A_23_P351168  | 0,011160938 up   | 1,9290311  | DNAJB7      | Homo sapiens DnaJ (Hsp40) homolog, subfamily B, member 7 (DNAJB7), mRNA [NM_145174]                                   |
| A_24_P225604  | 0,009710436 down | -2,0190687 | DNAJC10     | Homo sapiens DnaJ (Hsp40) homolog, subfamily C, member 10 (DNAJC10), transcript variant 1, mRNA [NM_018981]           |
| A_23_P140698  | 0,00551278 up    | 1,557554   | DNAJC17     | Homo sapiens DnaJ (Hsp40) homolog, subfamily C, member 17 (DNAJC17), mRNA [NM_018163]                                 |
| A_33_P3310533 | 0,013973764 down | -1,6050729 | DNAJC21     | Homo sapiens DnaJ (Hsp40) homolog, subfamily C, member 21 (DNAJC21), transcript variant 2, mRNA [NM_001012339]        |
| A_32_P407245  | 0,001390776 down | -2,958204  | DNAJC22     | Homo sapiens DnaJ (Hsp40) homolog, subfamily C, member 22 (DNAJC22), mRNA [NM_024902]                                 |
| A_33_P3238623 | 0,001455533 down | -2,9765627 | DNAJC27-AS1 | Homo sapiens DNAJC27 antisense RNA 1 (DNAJC27-AS1), long non-coding RNA [NR_034113]                                   |
| A_33_P3462960 | 0,034826424 down | -1,7510014 | DNAJC3      | Homo sapiens DnaJ (Hsp40) homolog, subfamily C, member 3 (DNAJC3), mRNA [NM_006260]                                   |
| A_23_P417921  | 0,002681698 down | -3,4832234 | DNAJC5G     | Homo sapiens DnaJ (Hsp40) homolog, subfamily C, member 5 gamma (DNAJC5G), transcript variant 1, mRNA [NM_173650]      |
| A_33_P3234202 | 0,003853421 down | -3,5173056 | DNASE1L3    | Homo sapiens deoxyribonuclease I-like 3 (DNASE1L3), transcript variant 1, mRNA [NM_004944]                            |
| A_33_P3329419 | 0,011025995 down | -1,7211856 | DNM1        | Homo sapiens dynamin 1 (DNM1), transcript variant 5, mRNA [NM_001288739]                                              |
| A_21_P0014010 | 0,024666678 up   | 1,9884621  | DNM1P35     | Homo sapiens FKS88 mRNA, complete cds. [AF357221]                                                                     |
| A_33_P3378384 | 0,04026399 down  | -1,8548464 | DNM1P46     | Homo sapiens DNM1 pseudogene 46 (DNM1P46), non-coding RNA [NR_003260]                                                 |
| A_33_P3264364 | 0,04994858 down  | -1,5548985 | DNM3        | Homo sapiens dynamin 3 (DNM3), transcript variant 3, mRNA [NM_001278252]                                              |
| A_21_P0000785 | 0,004500289 down | -1,5831301 | DNM3OS      | Homo sapiens DNM3 opposite strand/antisense RNA (DNM3OS), transcript variant 1, long non-coding RNA [NR_038397]       |
| A_23_P328206  | 0,022542162 up   | 1,5521035  | DNMBP       | Homo sapiens dynamin binding protein (DNMBP), mRNA [NM_015221]                                                        |
| A_33_P3329187 | 0,022357736 up   | 1,556207   | DNMT1       | Homo sapiens DNA (cytosine-5-)-methyltransferase 1 (DNMT1), transcript variant 1, mRNA [NM_001130823]                 |
| A_33_P3359508 | 0,013587849 up   | 2,4637272  | DNMT3B      | Homo sapiens DNA (cytosine-5) methyltransferase 3 beta isoform 6 variant protein. [AB208880]                          |
| A_23_P45059   | 0,001120868 up   | 1,6661294  | DOCK1       | Homo sapiens dedicator of cytokinesis 1 (DOCK1), transcript variant 2, mRNA [NM_001380]                               |
| A_23_P16722   | 0,009644154 down | -2,4588943 | DOCK10      | Homo sapiens dedicator of cytokinesis 10 (DOCK10), transcript variant DOCK10.1, mRNA [NM_014689]                      |
| A_23_P59637   | 0,007658771 up   | 2,1747725  | DOCK4       | Homo sapiens dedicator of cytokinesis 4 (DOCK4), mRNA [NM_014705]                                                     |
| A_21_P0014196 | 0,003022428 up   | 1,9664681  | DOCK4-AS1   | Homo sapiens DOCK4 antisense RNA 1 (DOCK4-AS1), long non-coding RNA [NR_103806]                                       |
| A_24_P203622  | 0,047245428 down | -1,7191191 | DOCK7       | Homo sapiens dedicator of cytokinesis 7 (DOCK7), transcript variant 2, mRNA [NM_033407]                               |
| A_23_P353888  | 0,006473901 up   | 1,666996   | DOCK8       | Homo sapiens dedicator of cytokinesis 8 (DOCK8), transcript variant 1, mRNA [NM_203447]                               |
| A_33_P3410279 | 0,03036796 up    | 1,6931001  | DOCK9       | dedicator of cytokinesis 9 [Source:HGNC Symbol;Acc:HGNC:14132] [ENST00000340449]                                      |
| A_33_P3228564 | 6,51E-04 down    | -2,3601186 | DOK3        | Homo sapiens docking protein 3 (DOK3), transcript variant 2, mRNA [NM_001144875]                                      |
| A_23_P40217   | 0,04773601 down  | -2,0114987 | DOK5        | Homo sapiens docking protein 5 (DOK5), transcript variant 1, mRNA [NM_018431]                                         |
| A_32_P160561  | 0,022296073 up   | 1,6394849  | DOK6        | Homo sapiens docking protein 6 (DOK6), mRNA [NM_152721]                                                               |
| A_33_P3416009 | 0,013051764 up   | 2,2344027  | DONSON      | Homo sapiens cDNA FLJ10412 fis, clone NT2RP1000040. [AK001274]                                                        |
| A_33_P3274164 | 0,016668975 down | -2,2119913 | DOT1L       | PREDICTED: Homo sapiens DOT1-like histone H3K79 methyltransferase (DOT1L), transcript variant X2, mRNA [XM_005259660] |
| A_23_P122508  | 0,032821715 up   | 2,2440035  | DPCR1       | Homo sapiens diffuse panbronchiolitis critical region 1 (DPCR1), mRNA [NM_080870]                                     |
| A_23_P129413  | 0,006410284 down | -2,1258245 | DPEP3       | Homo sapiens dipeptidase 3 (DPEP3), transcript variant 1, mRNA [NM_022357]                                            |
| A_33_P3317277 | 0,001422871 down | -2,062667  | DPPF1       | Homo sapiens D4, zinc and double PHD fingers family 1 (DPPF1), transcript variant 4, mRNA [NM_001289978]              |
| A_24_P140057  | 0,004362118 up   | 1,5014815  | DPP10       | Homo sapiens dipeptidyl-peptidase 10 (non-functional) (DPP10), transcript variant 1, mRNA [NM_020868]                 |
| A_23_P170888  | 0,019059066 up   | 2,4859843  | DPP6        | Homo sapiens dipeptidyl-peptidase 6 (DPP6), transcript variant 3, mRNA [NM_001039350]                                 |
| A_24_P288323  | 0,028084772 up   | 1,580212   | DPP9        | Homo sapiens dipeptidyl-peptidase 9 (DPP9), mRNA [NM_139159]                                                          |
| A_23_P200741  | 7,57E-04 down    | -2,8650231 | DPT         | Homo sapiens dermatopontin (DPT), mRNA [NM_001937]                                                                    |
| A_21_P0000652 | 0,006175277 up   | 1,7490034  | DPY19L2P3   | Homo sapiens DPY19L2 pseudogene 3 (DPY19L2P3), non-coding RNA [NR_036482]                                             |
| A_33_P3705275 | 0,026975082 down | -1,7875768 | DPY19L3     | Homo sapiens dpy-19-like 3 (C. elegans) (DPY19L3), transcript variant 1, mRNA [NM_207325]                             |
| A_21_P0000189 | 7,98E-04 up      | 1,607012   | DR1         | Homo sapiens down-regulator of transcription 1, TBP-binding (negative cofactor 2) (DR1), mRNA [NM_001938]             |
| A_24_P109417  | 0,001425563 down | -2,1778865 | DRAXIN      | Homo sapiens dorsal inhibitory axon guidance protein (DRAXIN), mRNA [NM_198545]                                       |
| A_23_P308722  | 0,02663354 up    | 1,5768726  | DRC1        | Homo sapiens dynein regulatory complex subunit 1 (DRC1), mRNA [NM_145038]                                             |
| A_33_P3373765 | 0,021281824 up   | 1,6649033  | DRD4        | Homo sapiens dopamine receptor D4 (DRD4), mRNA [NM_000797]                                                            |
| A_32_P54274   | 0,007347291 down | -2,555898  | DRD5        | Homo sapiens dopamine receptor D5 (DRD5), mRNA [NM_000798]                                                            |
| A_33_P3345344 | 0,040082086 up   | 1,6131399  | DRGX        | dorsal root ganglia homeobox [Source:HGNC Symbol;Acc:HGNC:21536] [ENST00000374139]                                    |

|               |             |      |            |         |                                                                                                                                    |
|---------------|-------------|------|------------|---------|------------------------------------------------------------------------------------------------------------------------------------|
| A_33_P3244753 | 0,048566543 | down | -1,5562943 | DRP2    | Homo sapiens dystrophin related protein 2 (DRP2), transcript variant 1, mRNA [NM_001939]                                           |
| A_23_P4494    | 9,89E-04    | down | -1,9485718 | DSC2    | Homo sapiens desmocollin 2 (DSC2), transcript variant Dsc2a, mRNA [NM_024422]                                                      |
| A_33_P3266898 | 0,008562752 | down | -1,6537274 | DSC3    | Homo sapiens desmocollin 3 (DSC3), transcript variant Dsc3a, mRNA [NM_001941]                                                      |
| A_23_P47340   | 0,00395136  | up   | 1,5103059  | DSCAML1 | Homo sapiens Down syndrome cell adhesion molecule like 1 (DSCAML1), mRNA [NM_020693]                                               |
| A_33_P3436732 | 0,005906404 | down | -1,6795889 | DSCR10  | Homo sapiens Down syndrome critical region 10 (non-protein coding) (DSCR10), long non-coding RNA [NR_027695]                       |
| A_23_P6252    | 0,010442387 | up   | 2,0846872  | DSCR8   | Homo sapiens Down syndrome critical region 8 (DSCR8), transcript variant 4, long non-coding RNA [NR_026838]                        |
| A_33_P3254996 | 0,04244527  | down | -1,5011464 | DSCR9   | Homo sapiens Down syndrome critical region 9 (non-protein coding) (DSCR9), long non-coding RNA [NR_026719]                         |
| A_23_P165937  | 0,001956194 | up   | 1,7212129  | DSN1    | Homo sapiens DSN1, MIS12 kinetochore complex component (DSN1), transcript variant 3, mRNA [NM_024918]                              |
| A_24_P145316  | 7,57E-04    | up   | 1,8062468  | DTNBP1  | Homo sapiens dystrobrevin binding protein 1 (DTNBP1), transcript variant 2, mRNA [NM_183040]                                       |
| A_24_P70117   | 0,002419105 | down | -1,5647241 | DTWD1   | Homo sapiens DTW domain containing 1 (DTWD1), transcript variant 1, mRNA [NM_020234]                                               |
| A_23_P54291   | 0,006314754 | up   | 1,8059084  | DUOX1   | Homo sapiens dual oxidase 1 (DUOX1), transcript variant 1, mRNA [NM_017434]                                                        |
| A_23_P151851  | 0,008428302 | up   | 1,5826753  | DUOX2   | Homo sapiens dual oxidase 2 (DUOX2), mRNA [NM_014080]                                                                              |
| A_23_P110712  | 0,003292607 | up   | 2,6109247  | DUSP1   | Homo sapiens dual specificity phosphatase 1 (DUSP1), mRNA [NM_004417]                                                              |
| A_24_P182494  | 0,004330461 | up   | 1,9164082  | DUSP10  | Homo sapiens dual specificity phosphatase 10 (DUSP10), transcript variant 1, mRNA [NM_007207]                                      |
| A_23_P207537  | 0,015296159 | up   | 1,5188663  | DUSP14  | Homo sapiens dual specificity phosphatase 14 (DUSP14), mRNA [NM_007026]                                                            |
| A_23_P369090  | 0,00373022  | up   | 1,7598325  | DUSP15  | dual specificity phosphatase 15 [Source:HGNC Symbol;Acc:HGNC:16236] [ENST00000278979]                                              |
| A_23_P120254  | 0,00730953  | up   | 1,5154352  | DUSP22  | Homo sapiens dual specificity phosphatase 22 (DUSP22), transcript variant 2, mRNA [NM_020185]                                      |
| A_23_P146134  | 4,07E-05    | down | -3,01515   | DUSP26  | Homo sapiens dual specificity phosphatase 26 (putative) (DUSP26), mRNA [NM_024025]                                                 |
| A_33_P3294645 | 0,019835008 | up   | 2,487461   | DUSP27  | Homo sapiens dual specificity phosphatase 27 (putative) (DUSP27), mRNA [NM_001080426]                                              |
| A_32_P98298   | 0,01600302  | down | -1,573665  | DUSP8   | Homo sapiens dual specificity phosphatase 8 (DUSP8), mRNA [NM_004420]                                                              |
| A_24_P417189  | 0,006913159 | down | -1,58841   | DUSP9   | Homo sapiens dual specificity phosphatase 9 (DUSP9), mRNA [NM_001395]                                                              |
| A_33_P3256105 | 0,001834772 | down | -2,7120774 | DUX4    | Homo sapiens double homeobox 4 (DUX4), mRNA [NM_001293798]                                                                         |
| A_21_P0014945 | 0,00490812  | down | -1,5617869 | DUX4    | PREDICTED: Homo sapiens double homeobox 4-like (DUX4L), partial ncRNA [XR_431831]                                                  |
| A_33_P3308586 | 0,011966401 | down | -2,86793   | DUXA    | Homo sapiens double homeobox A (DUXA), mRNA [NM_001012729]                                                                         |
| A_23_P55342   | 0,005366131 | up   | 1,6559526  | DVL2    | Homo sapiens dishevelled segment polarity protein 2 (DVL2), mRNA [NM_004422]                                                       |
| A_23_P380309  | 0,006360615 | up   | 1,5730883  | DYNAP   | Homo sapiens dynactin associated protein (DYNAP), mRNA [NM_173629]                                                                 |
| A_33_P3228340 | 0,002299959 | down | -1,8857358 | DYNC2L1 | Homo sapiens dynein, cytoplasmic 2, light intermediate chain 1, mRNA (cDNA clone IMAGE:5268633), complete cds. [BC040558]          |
| A_33_P3260445 | 0,013770338 | up   | 1,63385    | DYNLT1  | dynein, light chain, Tctex-type 1 [Source:HGNC Symbol;Acc:HGNC:11697] [ENST00000367088]                                            |
| A_23_P211126  | 4,48E-04    | up   | 1,7837408  | DYRK1A  | Homo sapiens dual-specificity tyrosine-(Y)-phosphorylation regulated kinase 1A (DYRK1A), transcript variant 2, mRNA [NM_130436]    |
| A_24_P345209  | 0,01952586  | down | -1,6890571 | DYRK3   | Homo sapiens dual-specificity tyrosine-(Y)-phosphorylation regulated kinase 3 (DYRK3), transcript variant 2, mRNA [NM_001004023]   |
| A_33_P3318861 | 6,12E-07    | down | -3,8533163 | DYTN    | Homo sapiens dystrotelin (DYTN), mRNA [NM_001093730]                                                                               |
| A_33_P3344169 | 0,008045947 | down | -1,7103448 | DYX1C1  | Homo sapiens dyslexia susceptibility 1 candidate 1 (DYX1C1), transcript variant 3, mRNA [NM_001033560]                             |
| A_21_P0000077 | 0,003504455 | up   | 2,1751118  | DZIP1L  | Homo sapiens DAZ interacting zinc finger protein 1-like (DZIP1L), transcript variant 2, mRNA [NM_001170538]                        |
| A_33_P3267651 | 0,049999043 | down | -1,6429102 | DZIP3   | Homo sapiens DAZ interacting zinc finger protein 3 (DZIP3), mRNA [NM_014648]                                                       |
| A_23_P152218  | 0,002492347 | up   | 1,7194058  | E2F4    | Homo sapiens E2F transcription factor 4, p107/p130-binding (E2F4), mRNA [NM_001950]                                                |
| A_33_P3318661 | 0,014770975 | down | -2,820066  | E2F7    | Homo sapiens E2F transcription factor 7 (E2F7), mRNA [NM_203394]                                                                   |
| A_23_P119478  | 0,03369076  | up   | 2,0352004  | EBI3    | Homo sapiens Epstein-Barr virus induced 3 (EBI3), mRNA [NM_005755]                                                                 |
| A_23_P6561    | 0,006324521 | up   | 1,527278   | EBLN2   | Homo sapiens endogenous Bornavirus-like nucleoprotein 2 (EBLN2), mRNA [NM_018029]                                                  |
| A_23_P128554  | 0,02712596  | up   | 1,5203484  | EBPL    | Homo sapiens emopamil binding protein-like (EBPL), transcript variant 1, mRNA [NM_032565]                                          |
| A_32_P155666  | 2,44E-06    | down | -3,5224547 | ECEL1   | Homo sapiens endothelin converting enzyme-like 1 (ECEL1), transcript variant 1, mRNA [NM_004826]                                   |
| A_33_P3610406 | 0,035881113 | down | -1,9595158 | ECEL1P2 | Homo sapiens endothelin converting enzyme-like 1, pseudogene 2 (ECEL1P2), non-coding RNA [NR_028501]                               |
| A_23_P303671  | 0,045427993 | down | -2,4793918 | ECM2    | Homo sapiens extracellular matrix protein 2, female organ and adipocyte specific (ECM2), transcript variant 1, mRNA [NM_001393]    |
| A_33_P3398386 | 0,008423259 | up   | 1,677102   | ECM2    | Homo sapiens extracellular matrix protein 2, female organ and adipocyte specific (ECM2), transcript variant 3, mRNA [NM_001197296] |
| A_23_P214821  | 0,015242857 | up   | 2,0308316  | EDN1    | Homo sapiens endothelin 1 (EDN1), transcript variant 1, mRNA [NM_001955]                                                           |
| A_33_P3258392 | 0,004991615 | up   | 2,2229662  | EDN1    | Homo sapiens endothelin 1 (EDN1), transcript variant 1, mRNA [NM_001955]                                                           |
| A_23_P312150  | 0,004822036 | up   | 4,1389832  | EDN2    | Homo sapiens endothelin 2 (EDN2), transcript variant 1, mRNA [NM_001956]                                                           |
| A_23_P17438   | 0,002242122 | up   | 1,643979   | EDN3    | Homo sapiens endothelin 3 (EDN3), transcript variant 2, mRNA [NM_207032]                                                           |
| A_33_P3401701 | 0,001845509 | down | -2,4981432 | EDNRA   | Homo sapiens endothelin receptor type A (EDNRA), transcript variant 1, mRNA [NM_001957]                                            |
| A_24_P217572  | 0,007951487 | down | -2,4608543 | EDNRA   | Homo sapiens endothelin receptor type A (EDNRA), transcript variant 1, mRNA [NM_001957]                                            |
| A_24_P330263  | 0,011145772 | up   | 3,0162613  | EDNRB   | Homo sapiens endothelin receptor type B (EDNRB), transcript variant 2, mRNA [NM_003991]                                            |
| A_23_P144202  | 0,01286239  | down | -1,999893  | EEFSEC  | Homo sapiens eukaryotic elongation factor, selenocysteine-tRNA-specific (EEFSEC), mRNA [NM_021937]                                 |
| A_33_P3785051 | 4,40E-05    | down | -2,860614  | EFCAB10 | Homo sapiens cDNA clone IMAGE:6616931, partial cds. [BC062748]                                                                     |
| A_32_P99753   | 0,004179734 | down | -2,0296485 | EFCAB12 | Homo sapiens EF-hand calcium binding domain 12 (EFCAB12), mRNA [NM_207307]                                                         |
| A_24_P374445  | 0,001638302 | up   | 1,728249   | EFCAB13 | Homo sapiens EF-hand calcium binding domain 13 (EFCAB13), transcript variant A, mRNA [NM_152347]                                   |
| A_23_P149476  | 0,018866753 | down | -1,699196  | EFCAB2  | Homo sapiens EF-hand calcium binding domain 2 (EFCAB2), transcript variant 1, mRNA [NM_032328]                                     |
| A_33_P3341399 | 0,03724218  | up   | 2,0360973  | EFCAB5  | Homo sapiens EF-hand calcium binding domain 5 (EFCAB5), transcript variant 1, mRNA [NM_198529]                                     |
| A_24_P144439  | 0,040022194 | up   | 1,67512    | EFHB    | Homo sapiens EF-hand domain family, member B (EFHB), mRNA [NM_144715]                                                              |
| A_33_P3418716 | 0,02257096  | up   | 2,0486677  | EFHD1   | Homo sapiens EF-hand domain family, member D1 (EFHD1), transcript variant 1, mRNA [NM_025202]                                      |
| A_23_P154338  | 0,028402377 | up   | 1,7657197  | EFHD1   | Homo sapiens EF-hand domain family, member D1 (EFHD1), transcript variant 1, mRNA [NM_025202]                                      |
| A_24_P365807  | 0,0458631   | up   | 1,5034336  | EFNB1   | Homo sapiens ephrin-B1 (EFNB1), mRNA [NM_004429]                                                                                   |
| A_33_P3373614 | 0,026753431 | up   | 2,1357713  | EFR3B   | Homo sapiens EFR3 homolog B (S. cerevisiae) (EFR3B), mRNA [NM_014971]                                                              |

|               |             |      |            |            |                                                                                                                                      |
|---------------|-------------|------|------------|------------|--------------------------------------------------------------------------------------------------------------------------------------|
| A_21_P0000670 | 0,002861952 | down | -1,809165  | EFTUD1     | Homo sapiens elongation factor Tu GTP binding domain containing 1 (EFTUD1), transcript variant 1, mRNA [NM_024580]                   |
| A_21_P0014141 | 0,015739515 | down | -2,5724912 | EGFLAM-AS2 | Homo sapiens EGFLAM antisense RNA 2 (EGFLAM-AS2), transcript variant 1, long non-coding RNA [NR_102749]                              |
| A_23_P46936   | 0,011283875 | down | -2,1333718 | EGR2       | Homo sapiens early growth response 2 (EGR2), transcript variant 1, mRNA [NM_000399]                                                  |
| A_23_P79251   | 0,042895146 | up   | 1,5655627  | EHD3       | Homo sapiens EH-domain containing 3 (EHD3), mRNA [NM_014600]                                                                         |
| A_23_P163458  | 0,030832924 | up   | 1,793863   | EHD4       | Homo sapiens EH-domain containing 4 (EHD4), mRNA [NM_139265]                                                                         |
| A_24_P123119  | 0,023222499 | down | -2,0867867 | EHHADH     | Homo sapiens enoyl-CoA hydratase/3-hydroxyacyl CoA dehydrogenase (EHHADH), transcript variant 1, mRNA [NM_001966]                    |
| A_33_P3570218 | 0,002554313 | up   | 2,1769478  | EHHADH-AS1 | Homo sapiens EHHADH antisense RNA 1 (EHHADH-AS1), long non-coding RNA [NR_038990]                                                    |
| A_33_P3420841 | 0,002072258 | up   | 1,7297856  | EIF3D      | eukaryotic translation initiation factor 3, subunit D [Source:HGNC Symbol;Acc:HGNC:3278] [ENST00000402116]                           |
| A_23_P121250  | 2,15E-04    | up   | 1,7888389  | EIF4A2     | Homo sapiens eukaryotic translation initiation factor 4A2 (EIF4A2), mRNA [NM_001967]                                                 |
| A_24_P218970  | 0,009203413 | up   | 1,6621192  | EIF4B      | Homo sapiens eukaryotic translation initiation factor 4B (EIF4B), transcript variant 2, mRNA [NM_001417]                             |
| A_24_P115621  | 0,003624963 | up   | 1,7561288  | EIF4EBP2   | Homo sapiens eukaryotic translation initiation factor 4E binding protein 2 (EIF4EBP2), mRNA [NM_004096]                              |
| A_33_P3367577 | 0,014299153 | down | -1,918253  | EIF4ENIF1  | eukaryotic translation initiation factor 4E nuclear import factor 1 [Source:HGNC Symbol;Acc:HGNC:16687] [ENST00000397520]            |
| A_33_P3306545 | 0,007566222 | up   | 1,6055776  | EIF4G2     | Homo sapiens eukaryotic translation initiation factor 4 gamma, 2 (EIF4G2), transcript variant 3, mRNA [NM_001172705]                 |
| A_33_P3265504 | 4,05E-04    | down | -2,0771916 | EIF5AL1    | Homo sapiens eukaryotic translation initiation factor 5A-like 1 (EIF5AL1), mRNA [NM_001099692]                                       |
| A_23_P104188  | 0,015842427 | up   | 1,9937354  | ELF3       | Homo sapiens E74-like factor 3 (ets domain transcription factor, epithelial-specific) (ELF3), transcript variant 1, mRNA [NM_004433] |
| A_33_P3210848 | 6,92E-04    | down | -2,8148923 | ELFN1      | Homo sapiens extracellular leucine-rich repeat and fibronectin type III domain containing 1 (ELFN1), mRNA [NM_001128636]             |
| A_23_P171054  | 0,002846356 | up   | 2,5292606  | ELK1       | Homo sapiens ELK1, member of ETS oncogene family (ELK1), transcript variant 2, mRNA [NM_005229]                                      |
| A_23_P338325  | 0,04199136  | up   | 1,8026216  | ELK3       | ELK3, ETS-domain protein (SRF accessory protein 2) [Source:HGNC Symbol;Acc:HGNC:3325] [ENST00000549985]                              |
| A_33_P3365010 | 3,51E-04    | down | -1,811571  | ELK4       | Homo sapiens ELK4, ETS-domain protein (SRF accessory protein 1) (ELK4), transcript variant b, mRNA [NM_021795]                       |
| A_23_P161098  | 3,15E-04    | down | -1,7513969 | ELK4       | Homo sapiens ELK4, ETS-domain protein (SRF accessory protein 1) (ELK4), transcript variant a, mRNA [NM_001973]                       |
| A_23_P16538   | 0,002874676 | up   | 1,5056599  | ELL        | Homo sapiens elongation factor RNA polymerase II (ELL), mRNA [NM_006532]                                                             |
| A_23_P58506   | 0,009220957 | down | -1,510791  | ELL2       | Homo sapiens elongation factor, RNA polymerase II, 2 (ELL2), mRNA [NM_012081]                                                        |
| A_33_P3235204 | 5,92E-04    | down | -2,2281508 | ELMOD3     | Homo sapiens ELMO/CED-12 domain containing 3 (ELMOD3), transcript variant 1, mRNA [NM_032213]                                        |
| A_33_P3297305 | 0,038555056 | up   | 1,6188455  | ELMOD3     | Homo sapiens ELMO/CED-12 domain containing 3 (ELMOD3), transcript variant 1, mRNA [NM_032213]                                        |
| A_23_P215454  | 0,017970193 | down | -2,1434155 | ELN        | Homo sapiens elastin (ELN), transcript variant 13, mRNA [NM_001278939]                                                               |
| A_23_P62741   | 0,01272562  | down | -1,6796091 | ELTD1      | Homo sapiens EGF, latrophilin and seven transmembrane domain containing 1 (ELTD1), mRNA [NM_022159]                                  |
| A_23_P384698  | 0,001464986 | up   | 1,8395041  | EMC3-AS1   | Homo sapiens EMC3 antisense RNA 1 (EMC3-AS1), long non-coding RNA [NR_103821]                                                        |
| A_33_P3333455 | 0,006747321 | down | -1,6864041 | EMILIN1    | Homo sapiens elastin microfibril interfacer 1 (EMILIN1), mRNA [NM_007046]                                                            |
| A_33_P3230558 | 0,0178784   | down | -2,9097154 | EML5       | Homo sapiens echinoderm microtubule associated protein like 5 (EML5), mRNA [NM_183387]                                               |
| A_23_P76488   | 0,001533294 | up   | 2,7437348  | EMP1       | Homo sapiens epithelial membrane protein 1 (EMP1), mRNA [NM_001423]                                                                  |
| A_23_P502336  | 0,001613648 | up   | 3,0525634  | EMR2       | Homo sapiens egf-like module containing, mucin-like, hormone receptor-like 2 (EMR2), transcript variant 1, mRNA [NM_013447]          |
| A_33_P3343715 | 0,007534971 | down | -1,7811725 | EMX1       | Homo sapiens empty spiracles homeobox 1, mRNA (cDNA clone IMAGE:5198260), complete cds. [BC037242]                                   |
| A_23_P315122  | 0,008555609 | down | -1,6279536 | EMX1       | Homo sapiens empty spiracles homeobox 1 (EMX1), mRNA [NM_004097]                                                                     |
| A_24_P892472  | 0,00470722  | up   | 1,533044   | EMX2OS     | Homo sapiens EMX2 opposite strand/antisense RNA (EMX2OS), long non-coding RNA [NR_002791]                                            |
| A_23_P134433  | 0,004071393 | down | -2,1234019 | EN2        | Homo sapiens engrailed homeobox 2 (EN2), mRNA [NM_001427]                                                                            |
| A_33_P3283525 | 1,72E-04    | down | -2,8275383 | ENAH       | enabled homolog (Drosophila) [Source:HGNC Symbol;Acc:HGNC:18271] [ENST00000498108]                                                   |
| A_33_P3274245 | 2,47E-05    | down | -3,2017236 | ENDOV      | Homo sapiens endonuclease V (ENDOV), transcript variant 1, mRNA [NM_173627]                                                          |
| A_33_P3405114 | 0,011816337 | down | -1,7067217 | ENHO       | Homo sapiens energy homeostasis associated (ENHO), mRNA [NM_198573]                                                                  |
| A_33_P3268478 | 0,03362398  | up   | 2,4324758  | ENO4       | PREDICTED: Homo sapiens enolase family member 4 (ENO4), transcript variant X3, mRNA [XM_006717835]                                   |
| A_33_P3314407 | 0,004169174 | up   | 2,05936    | ENO4       | Homo sapiens enolase family member 4 (ENO4), mRNA [NM_001242699]                                                                     |
| A_33_P3383491 | 0,015615943 | up   | 2,1667993  | ENPP7      | Homo sapiens ectonucleotide pyrophosphatase/phosphodiesterase 7 (ENPP7), mRNA [NM_178543]                                            |
| A_23_P410115  | 0,02173277  | up   | 2,7167153  | ENTHD1     | Homo sapiens ENTH domain containing 1 (ENTHD1), mRNA [NM_152512]                                                                     |
| A_33_P3267395 | 0,00668312  | up   | 1,5455282  | ENTHD1     | Homo sapiens ENTH domain containing 1 (ENTHD1), mRNA [NM_152512]                                                                     |
| A_33_P3262580 | 0,001272671 | down | -1,9607317 | ENTPD1     | ectonucleoside triphosphate diphosphohydrolase 1 [Source:HGNC Symbol;Acc:HGNC:3363] [ENST00000371206]                                |
| A_23_P40693   | 7,63E-08    | up   | 3,0056467  | EP300      | Homo sapiens E1A binding protein p300 (EP300), mRNA [NM_001429]                                                                      |
| A_23_P253158  | 4,81E-04    | up   | 1,9169128  | EP400      | Homo sapiens E1A binding protein p400 (EP400), mRNA [NM_015409]                                                                      |
| A_24_P185709  | 0,035125125 | up   | 1,8212844  | EPB41L1    | Homo sapiens erythrocyte membrane protein band 4.1-like 1 (EPB41L1), transcript variant 1, mRNA [NM_012156]                          |
| A_24_P944640  | 3,59E-05    | up   | 2,6409175  | EPB41L5    | Homo sapiens erythrocyte membrane protein band 4.1 like 5 (EPB41L5), transcript variant 1, mRNA [NM_020909]                          |
| A_23_P149281  | 0,001811384 | up   | 2,2461278  | EPHA2      | Homo sapiens EPH receptor A2 (EPHA2), mRNA [NM_004431]                                                                               |
| A_23_P147839  | 0,003417709 | up   | 1,6498951  | EPHA5      | Homo sapiens EPH receptor A5 (EPHA5), transcript variant 1, mRNA [NM_004439]                                                         |
| A_24_P34031   | 0,002845326 | up   | 1,5979704  | EPHA7      | Homo sapiens EPH receptor A7 (EPHA7), transcript variant 3, mRNA [NM_001288630]                                                      |
| A_23_P166993  | 0,013252611 | up   | 1,6178619  | EPHB1      | Homo sapiens EPH receptor B1 (EPHB1), mRNA [NM_004441]                                                                               |
| A_33_P3880302 | 0,0379964   | up   | 1,7301103  | EPHB2      | Homo sapiens EPH receptor B2 (EPHB2), transcript variant 2, mRNA [NM_004442]                                                         |
| A_23_P8834    | 0,04492877  | down | -1,6941019 | EPHX2      | Homo sapiens epoxide hydrolase 2, cytoplasmic (EPHX2), transcript variant 1, mRNA [NM_001979]                                        |
| A_33_P3317168 | 0,004511012 | down | -1,8272046 | EPS8L3     | Homo sapiens EPS8-like 3 (EPS8L3), transcript variant 1, mRNA [NM_139053]                                                            |
| A_33_P3418371 | 0,0117395   | down | -2,476254  | EPWW6493   | Homo sapiens clone DNA142975 EPWW6493 (UNQ6493) mRNA, complete cds. [AY358234]                                                       |
| A_24_P314585  | 0,02443491  | up   | 1,5268553  | ERAS       | ES cell expressed Ras [Source:HGNC Symbol;Acc:HGNC:5174] [ENST00000338270]                                                           |
| A_23_P30175   | 0,003749256 | up   | 1,5263602  | ERBB2IP    | Homo sapiens erbb2 interacting protein (ERBB2IP), transcript variant 2, mRNA [NM_018695]                                             |
| A_23_P349416  | 0,007924241 | up   | 2,006668   | ERBB3      | Homo sapiens v-erb-b2 avian erythroblastic leukemia viral oncogene homolog 3 (ERBB3), transcript variant 1, mRNA [NM_001982]         |
| A_33_P3211558 | 0,002223508 | up   | 1,7141474  | ERBB4      | Homo sapiens erb-b2 receptor tyrosine kinase 4 (ERBB4), transcript variant JM-a/CVT-1, mRNA [NM_005235]                              |
| A_24_P374759  | 0,03658763  | up   | 2,3656187  | ERC2       | Homo sapiens ELKS/RAB6-interacting/CAST family member 2 (ERC2), mRNA [NM_015576]                                                     |



|                |             |      |            |          |                                                                                                                    |
|----------------|-------------|------|------------|----------|--------------------------------------------------------------------------------------------------------------------|
| A_23_P18055    | 0,001127566 | down | -1,8585036 | ERC2-IT1 | Homo sapiens ERC2 intronic transcript 1 (non-protein coding) (ERC2-IT1), long non-coding RNA [NR_024615]           |
| A_24_P401990   | 0,006906077 | down | -1,5723    | ERCC2    | Homo sapiens excision repair cross-complementation group 2 (ERCC2), transcript variant 1, mRNA [NM_000400]         |
| A_23_P5325     | 0,003661848 | up   | 1,531169   | ERCC3    | Homo sapiens excision repair cross-complementation group 3 (ERCC3), transcript variant 1, mRNA [NM_000122]         |
| A_33_P3243364  | 8,19E-04    | down | -1,7636925 | ERCC4    | Homo sapiens excision repair cross-complementation group 4 (ERCC4), mRNA [NM_005236]                               |
| A_23_P96325    | 0,001393546 | down | -3,3412685 | ERCC6L   | Homo sapiens excision repair cross-complementation group 6-like (ERCC6L), mRNA [NM_017669]                         |
| A_23_P301414   | 0,009147773 | up   | 1,5297977  | ERG      | Homo sapiens v-ets avian erythroblastosis virus E26 oncogene homolog (ERG), transcript variant 2, mRNA [NM_004449] |
| A_32_P26969    | 0,00157811  | up   | 1,6210351  | ERICH1   | Homo sapiens glutamate-rich 1 (ERICH1), transcript variant 1, mRNA [NM_207332]                                     |
| A_21_P0001935  | 0,02320879  | down | -1,706053  | ERICH2   | Homo sapiens glutamate-rich 2 (ERICH2), transcript variant 3, mRNA [NM_001290031]                                  |
| A_32_P88231    | 0,021358388 | down | -2,302917  | ERICH2   | Homo sapiens glutamate-rich 2 (ERICH2), transcript variant 3, mRNA [NM_001290031]                                  |
| A_24_P522998   | 0,011366876 | up   | 1,6873815  | ERICH3   | Homo sapiens glutamate-rich 3 (ERICH3), mRNA [NM_001002912]                                                        |
| A_33_P3527931  | 0,044285484 | up   | 1,9202657  | ERICH4   | Homo sapiens glutamate-rich 4 (ERICH4), mRNA [NM_001130514]                                                        |
| A_23_P346431   | 0,039495114 | up   | 2,0218446  | ERICH6   | Homo sapiens glutamate-rich 6 (ERICH6), mRNA [NM_152394]                                                           |
| A_23_P52219    | 3,41E-04    | down | -1,7161516 | ERLIN1   | Homo sapiens ER lipid raft associated 1 (ERLIN1), mRNA [NM_006459]                                                 |
| A_33_P3363061  | 7,53E-04    | down | -1,5709026 | ERLIN2   | Homo sapiens ER lipid raft associated 2 (ERLIN2), transcript variant 2, mRNA [NM_001003790]                        |
| A_24_P276873   | 0,007341505 | up   | 2,7847862  | ERMN     | ermin, ERM-like protein [Source:HGNC Symbol;Acc:HGNC:29208] [ENST00000409395]                                      |
| A_23_P164042   | 0,027926857 | down | -1,5825058 | ERN1     | Homo sapiens endoplasmic reticulum to nucleus signaling 1 (ERN1), mRNA [NM_0014133]                                |
| A_33_P3391521  | 0,04915751  | up   | 1,9391391  | ERO1LB   | ERO1-like beta (S. cerevisiae) [Source:HGNC Symbol;Acc:HGNC:14355] [ENST00000366589]                               |
| A_23_P46470    | 6,29E-04    | up   | 2,5742476  | ERRFI1   | Homo sapiens ERBB receptor feedback inhibitor 1 (ERRFI1), mRNA [NM_018948]                                         |
| A_33_P3274179  | 4,51E-05    | up   | 2,8315766  | ERV18-1  | Homo sapiens cDNA FLJ44837 fis, clone BRACE3048677. [AK126787]                                                     |
| A_24_P924261   | 0,013387012 | up   | 1,7997565  | ERVFRD-1 | Homo sapiens endogenous retrovirus group FRD, member 1 (ERVFRD-1), mRNA [NM_207582]                                |
| A_21_P0011452  | 0,005507411 | up   | 1,8732511  | ERVK13-1 | Homo sapiens endogenous retrovirus group K13, member 1 (ERVK13-1), long non-coding RNA [NR_040023]                 |
| A_21_P0011451  | 0,00183766  | up   | 1,8008957  | ERVK13-1 | Homo sapiens endogenous retrovirus group K13, member 1 (ERVK13-1), long non-coding RNA [NR_040023]                 |
| A_23_P47410    | 0,001001694 | down | -2,3179276 | ESAM     | Homo sapiens endothelial cell adhesion molecule (ESAM), mRNA [NM_138961]                                           |
| A_23_P317347   | 0,040918473 | up   | 1,5483316  | ESCO1    | Homo sapiens establishment of sister chromatid cohesion N-acetyltransferase 1 (ESCO1), mRNA [NM_052911]            |
| A_24_P323598   | 0,009181517 | up   | 1,5034969  | ESCO2    | Homo sapiens establishment of sister chromatid cohesion N-acetyltransferase 2 (ESCO2), mRNA [NM_001017420]         |
| A_32_P901770   | 0,006881032 | up   | 1,6445563  | ESPN     | Homo sapiens espin (ESPN), mRNA [NM_031475]                                                                        |
| A_24_P383478   | 0,001982417 | down | -2,0436792 | ESR1     | Homo sapiens estrogen receptor 1 (ESR1), transcript variant 1, mRNA [NM_000125]                                    |
| A_33_P3347911  | 8,79E-07    | down | -3,446456  | ESR2     | Homo sapiens estrogen receptor 2 (ER beta) (ESR2), transcript variant g, mRNA [NM_001271877]                       |
| A_23_P1585     | 0,008307762 | up   | 1,5605787  | ESRRA    | Homo sapiens estrogen-related receptor alpha (ESRRA), transcript variant 1, mRNA [NM_004451]                       |
| A_23_P391857   | 1,70E-05    | down | -3,4335802 | ESRRB    | Homo sapiens estrogen-related receptor beta (ESRRB), mRNA [NM_004452]                                              |
| A_24_P132470   | 0,005093907 | up   | 1,6161141  | ESYT2    | Homo sapiens extended synaptotagmin-like protein 2 (ESYT2), mRNA [NM_020728]                                       |
| A_33_P3295098  | 0,01704706  | up   | 1,7905717  | ESYT3    | extended synaptotagmin-like protein 3 [Source:HGNC Symbol;Acc:HGNC:24295] [ENST00000289135]                        |
| A_33_P3357954  | 0,001653464 | down | -4,349572  | ETV1     | Homo sapiens ets variant 1 (ETV1), transcript variant 1, mRNA [NM_004956]                                          |
| A_33_P3343106  | 0,025167542 | down | -1,5154656 | ETV2     | Homo sapiens ets variant 2 (ETV2), transcript variant 1, mRNA [NM_014209]                                          |
| A_33_P3370848  | 0,04854229  | down | -1,5260133 | ETV2     | Homo sapiens ets variant 2 (ETV2), transcript variant 1, mRNA [NM_014209]                                          |
| A_33_P3321303  | 0,003607692 | down | -2,0873415 | ETV3     | Homo sapiens ets variant 3 (ETV3), transcript variant 1, mRNA [NM_001145312]                                       |
| A_33_P3324860  | 0,006528006 | down | -1,5857948 | ETV3     | Homo sapiens ets variant 3 (ETV3), transcript variant 1, mRNA [NM_001145312]                                       |
| A_32_P96000    | 0,012005357 | up   | 1,5192149  | ETV3L    | Homo sapiens ets variant 3-like (ETV3L), mRNA [NM_001004341]                                                       |
| A_33_P3356325  | 2,13E-05    | down | -2,4202154 | ETV6     | Homo sapiens ets variant 6 (ETV6), mRNA [NM_001987]                                                                |
| A_24_P649388   | 0,034770023 | up   | 1,8993859  | EVA1C    | Homo sapiens eva-1 homolog C (C. elegans) (EVA1C), transcript variant 1, mRNA [NM_058187]                          |
| A_23_P78092    | 0,01885017  | down | -2,3012228 | EV12A    | Homo sapiens ecotropic viral integration site 2A (EV12A), transcript variant 1, mRNA [NM_001003927]                |
| A_24_P368943   | 1,03E-05    | down | -2,8284686 | EVX1     | Homo sapiens even-skipped homeobox 1 (EVX1), mRNA [NM_001989]                                                      |
| A_19_P00322896 | 0,004588202 | down | -1,6236471 | EWSAT1   | Homo sapiens Ewing sarcoma associated transcript 1 (EWSAT1), long non-coding RNA [NR_026949]                       |
| A_19_P00321618 | 0,010617553 | down | -1,6290148 | EWSAT1   | Homo sapiens Ewing sarcoma associated transcript 1 (EWSAT1), long non-coding RNA [NR_026949]                       |
| A_21_P0011328  | 0,004875637 | down | -2,4133215 | EWSAT1   | Homo sapiens Ewing sarcoma associated transcript 1 (EWSAT1), long non-coding RNA [NR_026949]                       |
| A_19_P00319776 | 0,004002255 | up   | 1,5214367  | EWSAT1   | Homo sapiens Ewing sarcoma associated transcript 1 (EWSAT1), long non-coding RNA [NR_026949]                       |
| A_23_P23303    | 0,022069998 | up   | 2,4264603  | EXO1     | Homo sapiens exonuclease 1 (EXO1), transcript variant 3, mRNA [NM_003686]                                          |
| A_23_P214354   | 0,020419754 | up   | 1,629443   | EXOC2    | Homo sapiens exocyst complex component 2 (EXOC2), transcript variant 1, mRNA [NM_018303]                           |
| A_23_P424734   | 1,83E-04    | down | -2,222643  | EXOC3L1  | Homo sapiens exocyst complex component 3-like 1 (EXOC3L1), mRNA [NM_178516]                                        |
| A_24_P7946     | 0,003724593 | down | -1,5062692 | EXOC4    | Homo sapiens exocyst complex component 4 (EXOC4), transcript variant 2, mRNA [NM_001037126]                        |
| A_23_P14464    | 0,001477657 | down | -1,6260372 | EXOC5    | Homo sapiens exocyst complex component 5 (EXOC5), mRNA [NM_006544]                                                 |
| A_23_P415820   | 0,019158224 | up   | 1,637326   | EXOC6B   | Homo sapiens mRNA for KIAA0919 protein, partial cds. [AB023136]                                                    |
| A_33_P3390024  | 0,011119891 | up   | 1,6800578  | EXOC7    | Homo sapiens exocyst complex component 7 (EXOC7), transcript variant 7, mRNA [NM_001282314]                        |
| A_23_P430161   | 0,003501352 | up   | 1,5293694  | EXOC8    | Homo sapiens exocyst complex component 8 (EXOC8), mRNA [NM_175876]                                                 |
| A_33_P3276813  | 8,35E-04    | down | -2,452158  | EYS      | Homo sapiens eyes shut homolog (Drosophila) (EYS), transcript variant 1, mRNA [NM_001142800]                       |
| A_19_P00321802 | 0,014316908 | up   | 2,1438918  | EYS      | Homo sapiens eyes shut homolog (Drosophila) (EYS), transcript variant 1, mRNA [NM_001142800]                       |
| A_19_P00321803 | 0,008098099 | up   | 1,5118567  | EYS      | Homo sapiens eyes shut homolog (Drosophila) (EYS), transcript variant 1, mRNA [NM_001142800]                       |
| A_33_P3319302  | 0,002557066 | up   | 1,6588356  | F10      | coagulation factor X [Source:HGNC Symbol;Acc:HGNC:3528] [ENST00000410083]                                          |
| A_23_P41314    | 0,004248398 | down | -2,9510171 | F11      | Homo sapiens coagulation factor XI (F11), mRNA [NM_000128]                                                         |
| A_32_P140139   | 1,22E-07    | down | -5,374175  | F13A1    | Homo sapiens coagulation factor XIII, A1 polypeptide (F13A1), mRNA [NM_000129]                                     |
| A_33_P3416097  | 0,041908305 | up   | 1,5978563  | F13A1    | Homo sapiens coagulation factor XIII, A1 polypeptide (F13A1), mRNA [NM_000129]                                     |

|               |             |      |            |            |                                                                                                                             |
|---------------|-------------|------|------------|------------|-----------------------------------------------------------------------------------------------------------------------------|
| A_33_P3232955 | 7,80E-04    | down | -2,064049  | F2RL3      | Homo sapiens coagulation factor II (thrombin) receptor-like 3 (F2RL3), mRNA [NM_003950]                                     |
| A_24_P314451  | 0,004525866 | down | -1,507068  | F8         | Homo sapiens coagulation factor VIII, procoagulant component (F8), transcript variant 1, mRNA [NM_000132]                   |
| A_33_P3422499 | 0,014774672 | down | -1,6071633 | FAAHP1     | fatty acid amide hydrolase pseudogene 1 [Source:HGNC Symbol;Acc:HGNC:50679] [ENST00000606395]                               |
| A_24_P558365  | 0,001601827 | up   | 2,3001192  | FABP12     | Homo sapiens fatty acid binding protein 12 (FABP12), mRNA [NM_001105281]                                                    |
| A_23_P391711  | 0,004679105 | up   | 1,5643895  | FABP2      | Homo sapiens fatty acid binding protein 2, intestinal (FABP2), mRNA [NM_000134]                                             |
| A_24_P62783   | 0,010720147 | up   | 2,422172   | FABP3      | Homo sapiens fatty acid binding protein 3, muscle and heart (FABP3), mRNA [NM_004102]                                       |
| A_33_P3348348 | 0,035426676 | up   | 1,9435431  | FABP9      | Homo sapiens fatty acid binding protein 9, testis (FABP9), mRNA [NM_001080526]                                              |
| A_24_P294719  | 4,91E-04    | up   | 1,7289597  | FAF2       | Homo sapiens Fas associated factor family member 2 (FAF2), mRNA [NM_014613]                                                 |
| A_33_P3248982 | 0,005491264 | down | -2,2872682 | FAM1M2     | Homo sapiens Fas apoptotic inhibitory molecule 2 (FAM1M2), mRNA [NM_012306]                                                 |
| A_23_P415061  | 0,04715793  | down | -1,7052219 | FAM104B    | Homo sapiens family with sequence similarity 104, member B (FAM104B), transcript variant 1, mRNA [NM_138362]                |
| A_23_P66827   | 0,03630291  | up   | 1,716627   | FAM106A    | Homo sapiens family with sequence similarity 106, member A (FAM106A), long non-coding RNA [NR_026809]                       |
| A_33_P3273125 | 0,03173592  | up   | 1,860961   | FAM106CP   | Homo sapiens family with sequence similarity 106, member C, pseudogene (FAM106CP), long non-coding RNA [NR_026810]          |
| A_24_P164505  | 0,020702105 | up   | 1,9274954  | FAM106CP   | Homo sapiens family with sequence similarity 106, member C, pseudogene (FAM106CP), long non-coding RNA [NR_026810]          |
| A_33_P3367361 | 0,003260006 | up   | 1,7052593  | FAM107B    | Homo sapiens family with sequence similarity 107, member B (FAM107B), transcript variant 1, mRNA [NM_001282695]             |
| A_33_P3330443 | 0,020055912 | down | -1,5823969 | FAM110B    | Homo sapiens family with sequence similarity 110, member B (FAM110B), mRNA [NM_147189]                                      |
| A_24_P141629  | 0,004969107 | down | -1,7736809 | FAM111A    | Homo sapiens family with sequence similarity 111, member A (FAM111A), transcript variant 1, mRNA [NM_022074]                |
| A_23_P41908   | 7,05E-05    | up   | 1,8649619  | FAM114A2   | Homo sapiens family with sequence similarity 114, member A2 (FAM114A2), mRNA [NM_018691]                                    |
| A_33_P3424861 | 0,03609376  | down | -1,6719481 | FAM118A    | Homo sapiens family with sequence similarity 118, member A (FAM118A), transcript variant 1, mRNA [NM_001104595]             |
| A_24_P941505  | 7,10E-05    | up   | 1,811265   | FAM120A    | Homo sapiens family with sequence similarity 120A (FAM120A), transcript variant 1, mRNA [NM_014612]                         |
| A_23_P340188  | 0,019435441 | up   | 1,7801194  | FAM122C    | Homo sapiens family with sequence similarity 122C (FAM122C), transcript variant 2, mRNA [NM_138819]                         |
| A_33_P3350583 | 0,006401117 | up   | 1,6635574  | FAM122C    | Homo sapiens family with sequence similarity 122C (FAM122C), transcript variant 2, mRNA [NM_138819]                         |
| A_23_P344568  | 0,001125732 | up   | 1,9776001  | FAM124A    | Homo sapiens family with sequence similarity 124A (FAM124A), transcript variant 1, mRNA [NM_145019]                         |
| A_33_P3307795 | 0,011735971 | down | -2,2420087 | FAM124B    | family with sequence similarity 124B [Source:HGNC Symbol;Acc:HGNC:26224] [ENST00000243806]                                  |
| A_24_P233786  | 0,008132864 | down | -2,2358842 | FAM129A    | Homo sapiens family with sequence similarity 129, member A (FAM129A), mRNA [NM_052966]                                      |
| A_33_P3226167 | 0,008619238 | up   | 1,8443828  | FAM129B    | Homo sapiens family with sequence similarity 129, member B (FAM129B), transcript variant 1, mRNA [NM_022833]                |
| A_23_P345799  | 3,56E-05    | down | -3,2906842 | FAM129C    | Homo sapiens family with sequence similarity 129, member C (FAM129C), transcript variant 1, mRNA [NM_173544]                |
| A_24_P169073  | 0,006848342 | down | -1,7508674 | FAM131C    | Homo sapiens family with sequence similarity 131, member C (FAM131C), mRNA [NM_182623]                                      |
| A_32_P75792   | 0,004318236 | up   | 1,6423882  | FAM132A    | Homo sapiens family with sequence similarity 132, member A (FAM132A), mRNA [NM_001014980]                                   |
| A_24_P247536  | 1,20E-04    | down | -2,7078838 | FAM133B    | Homo sapiens family with sequence similarity 133, member B (FAM133B), transcript variant 2, mRNA [NM_001040057]             |
| A_24_P158065  | 0,001728036 | up   | 1,527433   | FAM133B    | Homo sapiens family with sequence similarity 133, member B (FAM133B), transcript variant 2, mRNA [NM_001040057]             |
| A_32_P233938  | 0,003294548 | up   | 1,5074688  | FAM133B    | Homo sapiens family with sequence similarity 133, member B (FAM133B), transcript variant 2, mRNA [NM_001040057]             |
| A_32_P923011  | 6,32E-04    | down | -2,1686156 | FAM138A    | Homo sapiens family with sequence similarity 138, member A (FAM138A), long non-coding RNA [NR_026818]                       |
| A_21_P0001906 | 5,43E-04    | down | -2,9384544 | FAM138D    | family with sequence similarity 138, member D [Source:EntrezGene;Acc:677784] [ENST00000546223]                              |
| A_33_P3691916 | 0,005662591 | up   | 1,7100301  | FAM13A     | Homo sapiens family with sequence similarity 13, member A (FAM13A), transcript variant 1, mRNA [NM_014883]                  |
| A_33_P3218905 | 0,02768031  | up   | 1,6890384  | FAM13A-AS1 | Homo sapiens FAM13A antisense RNA 1 (FAM13A-AS1), long non-coding RNA [NR_002806]                                           |
| A_24_P935794  | 0,030304937 | up   | 2,239764   | FAM150A    | Homo sapiens family with sequence similarity 150, member A (FAM150A), mRNA [NM_207413]                                      |
| A_33_P3320197 | 0,021728544 | down | -1,7152566 | FAM150B    | Homo sapiens family with sequence similarity 150, member B (FAM150B), mRNA [NM_001002919]                                   |
| A_33_P3728979 | 0,02997819  | down | -1,7160997 | FAM151B    | Homo sapiens family with sequence similarity 151, member B (FAM151B), mRNA [NM_205548]                                      |
| A_33_P3411414 | 0,029891273 | up   | 1,5925311  | FAM156B    | Homo sapiens family with sequence similarity 156, member B (FAM156B), mRNA [NM_001099684]                                   |
| A_24_P190873  | 0,013957304 | up   | 3,0950873  | FAM163A    | Homo sapiens family with sequence similarity 163, member A (FAM163A), mRNA [NM_173509]                                      |
| A_33_P3268378 | 0,005588337 | down | -2,0505102 | FAM167A    | Homo sapiens family with sequence similarity 167, member A (FAM167A), mRNA [NM_053279]                                      |
| A_33_P3354076 | 0,013553762 | down | -1,8828101 | FAM172BP   | Homo sapiens family with sequence similarity 172, member B, pseudogene (FAM172BP), non-coding RNA [NR_036433]               |
| A_33_P3234138 | 2,92E-07    | down | -3,9809952 | FAM172BP   | Homo sapiens family with sequence similarity 172, member B, pseudogene (FAM172BP), non-coding RNA [NR_036433]               |
| A_21_P0008784 | 0,018996093 | down | -1,9660755 | FAM174B    | family with sequence similarity 174, member B [Source:HGNC Symbol;Acc:HGNC:34339] [ENST00000557545]                         |
| A_33_P3367396 | 8,08E-04    | up   | 4,04873    | FAM177B    | Homo sapiens family with sequence similarity 177, member B (FAM177B), mRNA [NM_207468]                                      |
| A_24_P231546  | 0,003861708 | down | -1,9854071 | FAM178B    | Homo sapiens family with sequence similarity 178, member B (FAM178B), transcript variant B, mRNA [NM_016490]                |
| A_24_P595717  | 0,002702448 | up   | 2,1180608  | FAM179A    | Homo sapiens family with sequence similarity 179, member A (FAM179A), mRNA [NM_199280]                                      |
| A_21_P0012164 | 0,019883346 | down | -1,8290044 | FAM182B    | Homo sapiens family with sequence similarity 182, member B (FAM182B), transcript variant 1, long non-coding RNA [NR_026714] |
| A_23_P301572  | 0,001022237 | down | 2,5910285  | FAM184B    | Homo sapiens family with sequence similarity 184, member B (FAM184B), mRNA [NM_015688]                                      |
| A_32_P225415  | 0,002356326 | down | -2,5659325 | FAM187B    | Homo sapiens family with sequence similarity 187, member B (FAM187B), mRNA [NM_152481]                                      |
| A_23_P213863  | 0,004919835 | up   | 1,6486899  | FAM193B    | Homo sapiens family with sequence similarity 193, member B (FAM193B), transcript variant 3, mRNA [NM_001190946]             |
| A_32_P202013  | 0,001994301 | up   | 1,9106536  | FAM196A    | Homo sapiens family with sequence similarity 196, member A (FAM196A), mRNA [NM_001039762]                                   |
| A_33_P3375636 | 0,046729024 | up   | 2,5227191  | FAM196B    | Homo sapiens family with sequence similarity 196, member B (FAM196B), mRNA [NM_001129891]                                   |
| A_33_P3407494 | 0,007401437 | up   | 2,4989254  | FAM205A    | Homo sapiens family with sequence similarity 205, member A (FAM205A), mRNA [NM_001141917]                                   |
| A_32_P108254  | 0,015012047 | down | -2,2508464 | FAM20A     | Homo sapiens family with sequence similarity 20, member A (FAM20A), transcript variant 1, mRNA [NM_017565]                  |
| A_24_P352952  | 0,005664714 | up   | 1,6598387  | FAM20A     | Homo sapiens family with sequence similarity 20, member A (FAM20A), transcript variant 1, mRNA [NM_017565]                  |
| A_33_P3346635 | 0,0034861   | down | -3,0008318 | FAM20C     | Homo sapiens cDNA FLJ43291 fis, clone MESAN2015515. [AK125281]                                                              |
| A_24_P336577  | 0,002253953 | down | -2,1234443 | FAM212B    | Homo sapiens family with sequence similarity 212, member B (FAM212B), transcript variant 1, mRNA [NM_019099]                |
| A_23_P99853   | 0,001009749 | up   | 1,9668612  | FAM214A    | Homo sapiens family with sequence similarity 214, member A (FAM214A), transcript variant 1, mRNA [NM_019600]                |
| A_33_P3348204 | 0,016489772 | down | -1,76026   | FAM218A    | Homo sapiens family with sequence similarity 218, member A (FAM218A), mRNA [NM_153027]                                      |
| A_23_P372771  | 4,13E-04    | up   | 1,8678917  | FAM219B    | Homo sapiens family with sequence similarity 219, member B (FAM219B), mRNA [NM_020447]                                      |

|               |             |      |            |          |                                                                                                                                          |
|---------------|-------------|------|------------|----------|------------------------------------------------------------------------------------------------------------------------------------------|
| A_33_P3279124 | 6,94E-04    | down | -2,241831  | FAM21C   | Homo sapiens family with sequence similarity 21, member C (FAM21C), transcript variant 3, mRNA [NM_001169107]                            |
| A_23_P376799  | 0,001749602 | up   | 1,5378025  | FAM21C   | Homo sapiens family with sequence similarity 21, member C (FAM21C), transcript variant 1, mRNA [NM_015262]                               |
| A_21_P0014781 | 0,023249382 | down | -1,5580695 | FAM220A  | Homo sapiens family with sequence similarity 220, member A (FAM220A), mRNA [NM_001037163]                                                |
| A_33_P3371402 | 0,031571973 | up   | 1,5144013  | FAM223A  | Homo sapiens family with sequence similarity 223, member A (non-protein coding) (FAM223A), long non-coding RNA [NR_027401]               |
| A_33_P3347037 | 0,01996657  | down | -1,7251548 | FAM226A  | Homo sapiens family with sequence similarity 226, member A (non-protein coding) (FAM226A), long non-coding RNA [NR_026595]               |
| A_33_P3825317 | 0,01775975  | up   | 1,6009078  | FAM227A  | Homo sapiens family with sequence similarity 227, member A (FAM227A), transcript variant 2, mRNA [NM_001291030]                          |
| A_33_P3217490 | 3,54E-06    | down | -4,2254405 | FAM230B  | Homo sapiens family with sequence similarity 230, member B (non-protein coding) (FAM230B), long non-coding RNA [NR_108107]               |
| A_33_P3307535 | 0,002818223 | up   | 3,7065685  | FAM230C  | Homo sapiens family with sequence similarity 230, member C (FAM230C), long non-coding RNA [NR_027278]                                    |
| A_33_P3348794 | 0,00178906  | down | -2,6549115 | FAM231A  | Homo sapiens family with sequence similarity 231, member A (FAM231A), mRNA [NM_001282321]                                                |
| A_21_P0000707 | 0,003016254 | up   | 1,569634   | FAM24B   | Homo sapiens family with sequence similarity 24, member B (FAM24B), transcript variant 1, mRNA [NM_152644]                               |
| A_33_P3301219 | 0,021696292 | down | -2,624242  | FAM27C   | Homo sapiens family with sequence similarity 27, member C (FAM27C), long non-coding RNA [NR_027421]                                      |
| A_24_P342096  | 0,005607381 | down | -1,8374298 | FAM27C   | Homo sapiens family with sequence similarity 27, member C (FAM27C), long non-coding RNA [NR_027421]                                      |
| A_32_P942508  | 0,010624141 | up   | 2,2929559  | FAM27L   | Homo sapiens family with sequence similarity 27-like (FAM27L), long non-coding RNA [NR_028336]                                           |
| A_21_P0013755 | 0,030722627 | up   | 1,6322308  | FAM3C    | Homo sapiens family with sequence similarity 3, member C (FAM3C), transcript variant 1, mRNA [NM_014888]                                 |
| A_33_P3410589 | 0,006085541 | up   | 1,7659036  | FAM43A   | Homo sapiens family with sequence similarity 43, member A (FAM43A), mRNA [NM_153690]                                                     |
| A_33_P3290573 | 0,044492114 | down | -1,590135  | FAM46A   | Homo sapiens family with sequence similarity 46, member A (FAM46A), mRNA [NM_017633]                                                     |
| A_23_P12199   | 0,006724544 | up   | 1,7883741  | FAM46B   | Homo sapiens family with sequence similarity 46, member B (FAM46B), mRNA [NM_052943]                                                     |
| A_32_P105381  | 0,004591356 | up   | 1,5013219  | FAM47B   | Homo sapiens family with sequence similarity 47, member B (FAM47B), mRNA [NM_152631]                                                     |
| A_23_P163711  | 0,006363601 | down | -2,2620392 | FAM57B   | Homo sapiens family with sequence similarity 57, member B (FAM57B), mRNA [NM_031478]                                                     |
| A_23_P379327  | 0,028445618 | up   | 1,5911783  | FAM63B   | Homo sapiens family with sequence similarity 63, member B (FAM63B), transcript variant 1, mRNA [NM_001040450]                            |
| A_33_P3276918 | 0,011296997 | up   | 1,725439   | FAM64A   | Homo sapiens family with sequence similarity 64, member A (FAM64A), transcript variant 2, mRNA [NM_001195228]                            |
| A_33_P3316410 | 0,027176771 | down | -1,5786875 | FAM66A   | Homo sapiens family with sequence similarity 66, member A (FAM66A), long non-coding RNA [NR_026789]                                      |
| A_21_P0013467 | 0,008598109 | down | -2,208449  | FAM66C   | Homo sapiens family with sequence similarity 66, member C (FAM66C), long non-coding RNA [NR_026788]                                      |
| A_32_P203404  | 0,005996903 | up   | 1,5676231  | FAM69C   | Homo sapiens family with sequence similarity 69, member C (FAM69C), mRNA [NM_001044369]                                                  |
| A_23_P328145  | 0,04128869  | up   | 2,4037752  | FAM71D   | Homo sapiens family with sequence similarity 71, member D (FAM71D), mRNA [NM_173526]                                                     |
| A_24_P349807  | 0,017690929 | down | -1,7958219 | FAM71E2  | Homo sapiens family with sequence similarity 71, member E2 (FAM71E2), mRNA [NM_001145402]                                                |
| A_23_P134204  | 0,031037144 | up   | 2,2574735  | FAM71F1  | Homo sapiens family with sequence similarity 71, member F1 (FAM71F1), transcript variant 1, mRNA [NM_032599]                             |
| A_32_P112894  | 6,67E-04    | down | -1,8343762 | FAM76A   | Homo sapiens family with sequence similarity 76, member A (FAM76A), transcript variant 3, mRNA [NM_152660]                               |
| A_23_P321473  | 0,00437168  | up   | 1,5002732  | FAM76A   | Homo sapiens family with sequence similarity 76, member A (FAM76A), transcript variant 3, mRNA [NM_152660]                               |
| A_23_P360354  | 0,030963572 | up   | 1,5352794  | FAM81B   | Homo sapiens family with sequence similarity 81, member B (FAM81B), mRNA [NM_152548]                                                     |
| A_23_P216052  | 0,016607704 | up   | 1,6889387  | FAM83A   | Homo sapiens family with sequence similarity 83, member A (FAM83A), transcript variant 1, mRNA [NM_032899]                               |
| A_24_P43810   | 5,89E-04    | up   | 2,3330913  | FAM83A   | Homo sapiens family with sequence similarity 83, member A (FAM83A), transcript variant 2, mRNA [NM_207006]                               |
| A_23_P421175  | 0,002968998 | up   | 1,5633337  | FAM83H   | Homo sapiens family with sequence similarity 83, member H (FAM83H), mRNA [NM_198488]                                                     |
| A_23_P306215  | 0,00779916  | up   | 1,5431579  | FAM84A   | Homo sapiens family with sequence similarity 84, member A (FAM84A), mRNA [NM_145175]                                                     |
| A_33_P3421203 | 0,04362825  | down | -1,5116765 | FAM86B3P | Homo sapiens family with sequence similarity 86, member B3, pseudogene (FAM86B3P), transcript variant 1, non-coding RNA [NR_024362]      |
| A_21_P0011081 | 0,01365763  | down | -1,5429541 | FAM86C1  | Homo sapiens family with sequence similarity 86, member C1 (FAM86C1), transcript variant 3, mRNA [NM_001099653]                          |
| A_33_P3239087 | 0,041032266 | down | -1,8037536 | FAM87A   | Homo sapiens family with sequence similarity 87, member A (FAM87A), long non-coding RNA [NR_103537]                                      |
| A_33_P3330906 | 0,014818569 | up   | 1,9203304  | FAM87B   | Homo sapiens family with sequence similarity 87, member B (FAM87B), long non-coding RNA [NR_103536]                                      |
| A_23_P133648  | 0,034307715 | up   | 1,6330312  | FAM8A1   | Homo sapiens family with sequence similarity 8, member A1 (FAM8A1), mRNA [NM_016255]                                                     |
| A_33_P3212630 | 0,001747256 | down | -3,3527334 | FAM90A1  | Homo sapiens family with sequence similarity 90, member A1 (FAM90A1), mRNA [NM_018088]                                                   |
| A_21_P0003568 | 0,001939059 | up   | 1,8156425  | FAM90A1  | Homo sapiens family with sequence similarity 90, member A1 (FAM90A1), mRNA [NM_018088]                                                   |
| A_23_P394323  | 0,043266747 | up   | 1,9558101  | FAM98B   | Homo sapiens cDNA FLJ38426 fis, clone FEBRA2012507. [AK095745]                                                                           |
| A_33_P3378785 | 0,024480637 | down | -1,5395018 | FAM99A   | family with sequence similarity 99, member A (non-protein coding) [Source:HGNC Symbol;Acc:HGNC:32368] [ENST00000538190]                  |
| A_32_P12202   | 0,01610589  | up   | 1,6216207  | FAM9C    | family with sequence similarity 9, member C [Source:HGNC Symbol;Acc:HGNC:18405] [ENST00000333995]                                        |
| A_23_P206441  | 0,004933883 | up   | 1,9991549  | FANCA    | Homo sapiens Fanconi anemia, complementation group A (FANCA), transcript variant 1, mRNA [NM_000135]                                     |
| A_23_P143994  | 0,04938628  | up   | 1,629476   | FANCD2   | Homo sapiens Fanconi anemia, complementation group D2 (FANCD2), transcript variant 2, mRNA [NM_001018115]                                |
| A_23_P318989  | 0,004417549 | down | -1,5394521 | FANCD2OS | Homo sapiens FANCD2 opposite strand (FANCD2OS), transcript variant 1, mRNA [NM_173472]                                                   |
| A_33_P3388331 | 0,016305903 | up   | 1,5709159  | FARP1    | Homo sapiens FERM, RhoGEF (ARHGEF) and pleckstrin domain protein 1 (chondrocyte-derived) (FARP1), transcript variant 1, mRNA [NM_005766] |
| A_24_P16833   | 0,020856353 | up   | 1,6721623  | FAT3     | Homo sapiens FAT atypical cadherin 3 (FAT3), mRNA [NM_001008781]                                                                         |
| A_23_P22565   | 0,041596003 | up   | 1,845195   | FATE1    | Homo sapiens fetal and adult testis expressed 1 (FATE1), mRNA [NM_033085]                                                                |
| A_23_P501831  | 0,00733359  | down | -1,7351876 | FAXDC2   | Homo sapiens fatty acid hydroxylase domain containing 2 (FAXDC2), mRNA [NM_032385]                                                       |
| A_24_P87458   | 0,035986487 | up   | 2,1667743  | FBF1     | Homo sapiens Fas (TNFRSF6) binding factor 1 (FBF1), mRNA [NM_001080542]                                                                  |
| A_23_P337934  | 0,04515116  | up   | 1,5523353  | FBLIM1   | Homo sapiens filamin binding LIM protein 1 (FBLIM1), transcript variant 1, mRNA [NM_017556]                                              |
| A_33_P3268954 | 0,03212055  | down | -1,6624596 | FBLL1    | Homo sapiens fibrillar-like 1 (FBLL1), non-coding RNA [NR_024356]                                                                        |
| A_33_P3334248 | 0,002271559 | down | -1,6398602 | FBRSL1   | fibrosin [Source:HGNC Symbol;Acc:HGNC:20442] [ENST00000484152]                                                                           |
| A_21_P0014038 | 7,27E-04    | down | -1,9793236 | FBRSL1   | Homo sapiens fibrosin-like 1 (FBRSL1), mRNA [NM_001142641]                                                                               |
| A_24_P280497  | 7,37E-07    | down | -4,9480095 | FBRSL1   | Homo sapiens fibrosin-like 1 (FBRSL1), mRNA [NM_001142641]                                                                               |
| A_23_P379071  | 9,06E-04    | down | -2,8962922 | FBXL13   | Homo sapiens F-box and leucine-rich repeat protein 13 (FBXL13), transcript variant 1, mRNA [NM_145032]                                   |
| A_23_P406385  | 0,005929473 | up   | 1,8685771  | FBXL16   | Homo sapiens F-box and leucine-rich repeat protein 16 (FBXL16), mRNA [NM_153350]                                                         |
| A_24_P7600    | 5,01E-05    | down | -3,129352  | FBXL7    | Homo sapiens F-box and leucine-rich repeat protein 7 (FBXL7), transcript variant 1, mRNA [NM_012304]                                     |
| A_33_P3273822 | 0,013145187 | up   | 1,5259279  | FBXO11   | F-box protein 11 [Source:HGNC Symbol;Acc:HGNC:13590] [ENST00000434234]                                                                   |

|                |             |      |            |            |                                                                                                                                     |
|----------------|-------------|------|------------|------------|-------------------------------------------------------------------------------------------------------------------------------------|
| A_23_P395911   | 0,009411264 | down | -1,6269808 | FBXO17     | F-box protein 17 [Source:HGNC Symbol;Acc:HGNC:18754] [ENST00000601394]                                                              |
| A_24_P13715    | 0,008266107 | down | -2,0570483 | FBXO22     | Homo sapiens F-box protein 22 (FBXO22), transcript variant 1, mRNA [NM_147188]                                                      |
| A_33_P3352941  | 0,004730377 | down | -2,0010238 | FBXO22-AS1 | Homo sapiens FBXO22 antisense RNA 1 (FBXO22-AS1), long non-coding RNA [NR_003136]                                                   |
| A_33_P3319593  | 0,022781504 | down | -1,8319618 | FBXO31     | Homo sapiens F-box protein 31 (FBXO31), transcript variant 1, mRNA [NM_024735]                                                      |
| A_24_P41021    | 0,001233473 | up   | 1,5855432  | FBXO33     | Homo sapiens F-box protein 33 (FBXO33), mRNA [NM_203301]                                                                            |
| A_33_P3237225  | 4,28E-04    | up   | 1,8605698  | FBXO34     | Homo sapiens F-box protein 34 (FBXO34), transcript variant 2, mRNA [NM_152231]                                                      |
| A_23_P146811   | 8,67E-04    | up   | 1,5966741  | FBXO38     | Homo sapiens F-box protein 38 (FBXO38), transcript variant 1, mRNA [NM_030793]                                                      |
| A_23_P27744    | 0,003682372 | up   | 1,758386   | FBXO46     | Homo sapiens F-box protein 46 (FBXO46), mRNA [NM_001080469]                                                                         |
| A_33_P3214745  | 7,46E-04    | down | -2,5513668 | FBXO48     | Homo sapiens F-box protein 48 (FBXO48), mRNA [NM_001024680]                                                                         |
| A_33_P3268686  | 0,033927105 | down | -1,9083179 | FBXW12     | Homo sapiens F-box and WD repeat domain containing 12 (FBXW12), transcript variant 1, mRNA [NM_207102]                              |
| A_33_P3382606  | 9,33E-05    | down | -6,1770062 | FBXW12     | Homo sapiens F-box and WD repeat domain containing 12 (FBXW12), transcript variant 1, mRNA [NM_207102]                              |
| A_33_P3364488  | 0,044976752 | up   | 2,3534455  | FCAMR      | Homo sapiens Fc receptor, IgA, IgM, high affinity (FCAMR), transcript variant 3, mRNA [NM_001170631]                                |
| A_24_P348265   | 0,011067308 | up   | 1,5136819  | FCAR       | Homo sapiens Fc fragment of IgA, receptor for (FCAR), transcript variant 3, mRNA [NM_133271]                                        |
| A_33_P3272628  | 0,032828458 | down | -1,8110564 | FCER1G     | Fc fragment of IgE, high affinity I, receptor for; gamma polypeptide [Source:HGNC Symbol;Acc:HGNC:3611] [ENST00000367992]           |
| A_23_P349083   | 1,31E-04    | up   | 2,490516   | FCHO2      | Homo sapiens FCH domain only 2 (FCHO2), transcript variant 1, mRNA [NM_138782]                                                      |
| A_23_P157875   | 8,58E-04    | down | -3,77583   | FCN1       | Homo sapiens ficolin (collagen/fibrinogen domain containing) 1 (FCN1), mRNA [NM_002003]                                             |
| A_23_P216756   | 0,01066284  | up   | 2,2674217  | FCN2       | Homo sapiens ficolin (collagen/fibrinogen domain containing lectin) 2 (FCN2), transcript variant SV0, mRNA [NM_004108]              |
| A_33_P3294504  | 0,001223975 | down | -2,2018769 | FCRL1      | Homo sapiens Fc receptor-like 1 (FCRL1), transcript variant 2, mRNA [NM_001159397]                                                  |
| A_23_P103803   | 0,023062773 | up   | 1,6132985  | FCRL3      | Homo sapiens Fc receptor-like 3 (FCRL3), mRNA [NM_052939]                                                                           |
| A_33_P3335511  | 0,00894197  | down | -1,9285803 | FCRL5      | Homo sapiens Fc receptor-like 5 (FCRL5), transcript variant 2, mRNA [NM_001195388]                                                  |
| A_33_P3363933  | 1,52E-05    | down | -5,8658667 | FCRL6      | Homo sapiens Fc receptor-like 6 (FCRL6), transcript variant 2, mRNA [NM_001284217]                                                  |
| A_23_P46039    | 0,010873776 | down | -3,3095942 | FCRLA      | Homo sapiens Fc receptor-like A (FCRLA), transcript variant 2, mRNA [NM_032738]                                                     |
| A_32_P151933   | 3,10E-04    | down | -3,2773395 | FECH       | Homo sapiens ferrochelatase (FECH), transcript variant 1, mRNA [NM_001012515]                                                       |
| A_23_P151970   | 0,019278765 | up   | 1,9405661  | FEM1B      | Homo sapiens fem-1 homolog b (C. elegans) (FEM1B), mRNA [NM_015322]                                                                 |
| A_19_P00322654 | 0,010244543 | up   | 1,7101922  | FENDRR     | Homo sapiens FOXF1 adjacent non-coding developmental regulatory RNA (FENDRR), transcript variant 2, long non-coding RNA [NR_036444] |
| A_19_P00322440 | 0,011039838 | up   | 1,5175792  | FENDRR     | Homo sapiens FOXF1 adjacent non-coding developmental regulatory RNA (FENDRR), transcript variant 2, long non-coding RNA [NR_036444] |
| A_33_P3613688  | 0,027775241 | down | -1,6935943 | FER1L6-AS2 | 601564882F1 NIH_MGC_20 Homo sapiens cDNA clone IMAGE:3925989 5', mRNA sequence [BE729513]                                           |
| A_33_P3262949  | 0,014979539 | up   | 1,9489259  | FERMT1     | fermitin family member 1 [Source:HGNC Symbol;Acc:HGNC:15889] [ENST00000378844]                                                      |
| A_33_P3217009  | 0,014866857 | down | -1,6326511 | FEZF1-AS1  | Homo sapiens FEZF1 antisense RNA 1 (FEZF1-AS1), long non-coding RNA [NR_036484]                                                     |
| A_24_P405631   | 0,008987518 | up   | 1,5396821  | FEZF2      | Homo sapiens FEZ family zinc finger 2 (FEZF2), mRNA [NM_018008]                                                                     |
| A_23_P397391   | 3,95E-04    | down | -3,838275  | FFAR2      | Homo sapiens free fatty acid receptor 2 (FFAR2), mRNA [NM_005306]                                                                   |
| A_33_P3298810  | 0,002698344 | up   | 1,6344917  | FFAR3      | Homo sapiens free fatty acid receptor 3 (FFAR3), mRNA [NM_005304]                                                                   |
| A_24_P129588   | 0,006758017 | down | -2,2586274 | FFAR4      | Homo sapiens free fatty acid receptor 4 (FFAR4), transcript variant 1, mRNA [NM_181745]                                             |
| A_24_P282251   | 0,00283166  | up   | 1,5249639  | FGA        | Homo sapiens fibrinogen alpha chain (FGA), transcript variant alpha, mRNA [NM_021871]                                               |
| A_33_P3345886  | 0,007376475 | down | -2,216262  | FGD2       | FYVE, RhoGEF and PH domain containing 2 [Source:HGNC Symbol;Acc:HGNC:3664] [ENST00000493635]                                        |
| A_24_P937325   | 0,002067509 | up   | 1,9224793  | FGD4       | FYVE, RhoGEF and PH domain containing 4 [Source:HGNC Symbol;Acc:HGNC:19125] [ENST00000472289]                                       |
| A_21_P0014935  | 9,60E-04    | down | -1,6134119 | FGD5-AS1   | Homo sapiens FGD5 antisense RNA 1 (FGD5-AS1), transcript variant 1, long non-coding RNA [NR_046251]                                 |
| A_33_P3333282  | 2,94E-04    | up   | 1,8044817  | FGF11      | fibroblast growth factor 11 [Source:HGNC Symbol;Acc:HGNC:3667] [ENST00000293829]                                                    |
| A_23_P429363   | 0,026263436 | up   | 2,443448   | FGF17      | Homo sapiens fibroblast growth factor 17 (FGF17), mRNA [NM_003867]                                                                  |
| A_23_P412389   | 0,031494185 | up   | 1,5014063  | FGF18      | Homo sapiens fibroblast growth factor 18 (FGF18), mRNA [NM_003862]                                                                  |
| A_33_P3379886  | 0,016049786 | down | -2,9597058 | FGF2       | Homo sapiens fibroblast growth factor 2 (basic) (FGF2), mRNA [NM_002006]                                                            |
| A_33_P3419696  | 0,014554832 | down | -4,3174977 | FGF2       | Homo sapiens fibroblast growth factor 2 (basic) (FGF2), mRNA [NM_002006]                                                            |
| A_23_P395404   | 0,002446821 | up   | 1,5789539  | FGF20      | Homo sapiens fibroblast growth factor 20 (FGF20), mRNA [NM_019851]                                                                  |
| A_24_P355720   | 2,02E-04    | down | -3,3695152 | FGF4       | Homo sapiens fibroblast growth factor 4 (FGF4), mRNA [NM_002007]                                                                    |
| A_23_P390734   | 0,022992566 | up   | 1,640866   | FGFR1OP2   | Homo sapiens FGFR1 oncogene partner 2 (FGFR1OP2), transcript variant 1, mRNA [NM_015633]                                            |
| A_23_P212830   | 0,0019482   | up   | 2,7260854  | FGFR3      | Homo sapiens fibroblast growth factor receptor 3 (FGFR3), transcript variant 1, mRNA [NM_000142]                                    |
| A_23_P500501   | 0,001470698 | up   | 2,3992887  | FGFR3      | Homo sapiens fibroblast growth factor receptor 3 (FGFR3), transcript variant 1, mRNA [NM_000142]                                    |
| A_23_P92754    | 1,05E-06    | down | -3,103521  | FGFR4      | Homo sapiens fibroblast growth factor receptor 4 (FGFR4), transcript variant 3, mRNA [NM_213647]                                    |
| A_23_P20484    | 1,52E-06    | down | -3,35292   | FGL1       | Homo sapiens fibrinogen-like 1 (FGL1), transcript variant 4, mRNA [NM_201553]                                                       |
| A_23_P328259   | 0,004330946 | up   | 1,6456351  | FHDC1      | Homo sapiens FH2 domain containing 1 (FHDC1), mRNA [NM_033393]                                                                      |
| A_33_P3849275  | 5,33E-06    | down | -2,8817616 | FHL1       | Homo sapiens four and a half LIM domains 1 (FHL1), transcript variant 4, mRNA [NM_001159704]                                        |
| A_33_P3398392  | 0,00401109  | up   | 1,7874069  | FHL1       | four and a half LIM domains 1 [Source:HGNC Symbol;Acc:HGNC:3702] [ENST00000370674]                                                  |
| A_33_P3237552  | 0,03620623  | down | -1,7886882 | FIBCD1     | Homo sapiens fibrinogen C domain containing 1 (FIBCD1), transcript variant 1, mRNA [NM_032843]                                      |
| A_23_P45185    | 0,04419588  | down | -2,0750341 | FIGF       | Homo sapiens c-fos induced growth factor (vascular endothelial growth factor D) (FIGF), mRNA [NM_004469]                            |
| A_33_P3315944  | 0,015261022 | up   | 1,5539688  | FIGLA      | Homo sapiens folliculogenesis specific basic helix-loop-helix (FIGLA), mRNA [NM_001004311]                                          |
| A_24_P203407   | 8,90E-04    | down | -1,8672665 | FITM2      | Homo sapiens fat storage-inducing transmembrane protein 2 (FITM2), mRNA [NM_001080472]                                              |
| A_21_P0000010  | 2,16E-04    | up   | 4,4326086  | FKBP5      | Homo sapiens FK506 binding protein 5 (FKBP5), transcript variant 4, mRNA [NM_001145777]                                             |
| A_24_P38081    | 1,37E-05    | up   | 7,811647   | FKBP5      | Homo sapiens FK506 binding protein 5 (FKBP5), transcript variant 1, mRNA [NM_004117]                                                |
| A_33_P3259092  | 0,010087859 | down | -1,8276203 | FKTN       | Homo sapiens fukutin (FKTN), transcript variant 1, mRNA [NM_001079802]                                                              |
| A_33_P3359763  | 0,020268353 | up   | 2,289631   | FLCN       | folliculin [Source:HGNC Symbol;Acc:HGNC:27310] [ENST00000466317]                                                                    |
| A_24_P173124   | 0,001927992 | up   | 2,1148808  | FLCN       | Homo sapiens folliculin (FLCN), transcript variant 1, mRNA [NM_144997]                                                              |

|                |             |      |            |          |                                                                                                     |
|----------------|-------------|------|------------|----------|-----------------------------------------------------------------------------------------------------|
| A_21_P0014075  | 0,003158539 | down | -2,2762873 | FLG-AS1  | PREDICTED: Homo sapiens FLG antisense RNA 1 (FLG-AS1), misc_RNA [XR_108352]                         |
| A_33_P3335740  | 0,020990472 | up   | 1,5296347  | FLJ10038 | Homo sapiens uncharacterized protein FLJ10038 (FLJ10038), long non-coding RNA [NR_026891]           |
| A_24_P516246   | 0,015995814 | down | -1,7149222 | FLJ12825 | Homo sapiens uncharacterized LOC440101 (FLJ12825), long non-coding RNA [NR_026655]                  |
| A_33_P3367606  | 0,01777231  | down | -2,1124868 | FLJ13224 | Homo sapiens uncharacterized LOC79857 (FLJ13224), long non-coding RNA [NR_026806]                   |
| A_19_P00322224 | 0,003457243 | down | -1,6482079 | FLJ16779 | Homo sapiens uncharacterized LOC100192386 (FLJ16779), long non-coding RNA [NR_024389]               |
| A_33_P3394584  | 0,004035913 | down | -2,9776568 | FLJ16779 | Homo sapiens uncharacterized LOC100192386 (FLJ16779), long non-coding RNA [NR_024389]               |
| A_23_P42684    | 0,019135697 | down | -2,2966716 | FLJ20712 | PREDICTED: Homo sapiens uncharacterized FLJ20712 (FLJ20712), misc_RNA [XR_108766]                   |
| A_33_P3301752  | 9,41E-04    | down | -2,1593962 | FLJ21369 | Homo sapiens cDNA: FLJ21369 fis, clone COL03091. [AK025022]                                         |
| A_33_P3257518  | 0,03100291  | up   | 1,5447198  | FLJ22447 | Homo sapiens uncharacterized LOC400221 (FLJ22447), long non-coding RNA [NR_039985]                  |
| A_33_P3555368  | 0,023832219 | up   | 1,6851894  | FLJ26086 | Homo sapiens cDNA FLJ26086 fis, clone RCT05358. [AK129597]                                          |
| A_33_P3255314  | 0,040211808 | up   | 1,5473405  | FLJ26245 | Homo sapiens uncharacterized LOC400533 (FLJ26245), long non-coding RNA [NR_033985]                  |
| A_21_P0000908  | 0,00369099  | down | -3,0145388 | FLJ27354 | Homo sapiens uncharacterized LOC400761 (FLJ27354), long non-coding RNA [NR_033981]                  |
| A_19_P00320314 | 0,017562265 | down | -1,5386207 | FLJ32255 | Homo sapiens uncharacterized LOC643977 (FLJ32255), long non-coding RNA [NR_104643]                  |
| A_19_P00320757 | 1,30E-04    | down | -2,5267632 | FLJ32255 | Homo sapiens uncharacterized LOC643977 (FLJ32255), long non-coding RNA [NR_104643]                  |
| A_24_P307724   | 7,91E-06    | down | -3,1189468 | FLJ33360 | Homo sapiens FLJ33360 protein (FLJ33360), long non-coding RNA [NR_028351]                           |
| A_33_P3338215  | 0,006682403 | up   | 1,6131512  | FLJ33544 | Homo sapiens cDNA FLJ33544 fis, clone BRAMY2008333. [AK090863]                                      |
| A_33_P3377763  | 3,27E-04    | down | -1,9197592 | FLJ36000 | Homo sapiens uncharacterized FLJ36000 (FLJ36000), long non-coding RNA [NR_027084]                   |
| A_33_P3347099  | 0,04967377  | down | -2,3025231 | FLJ36000 | Homo sapiens uncharacterized FLJ36000 (FLJ36000), long non-coding RNA [NR_027084]                   |
| A_21_P0003889  | 3,89E-06    | down | -5,948334  | FLJ36777 | uncharacterized LOC730971 [Source:EntrezGene;Acc:730971] [ENST00000504402]                          |
| A_21_P0007120  | 0,013756256 | up   | 1,6984112  | FLJ37035 | uncharacterized LOC399821 [Source:EntrezGene;Acc:399821] [ENST00000531977]                          |
| A_33_P3249893  | 2,27E-04    | down | -3,184977  | FLJ37786 | Homo sapiens cDNA FLJ37786 fis, clone BRHIP2028480. [AK095105]                                      |
| A_24_P194661   | 0,003836976 | up   | 1,7033844  | FLJ38379 | PREDICTED: Homo sapiens uncharacterized FLJ38379 (FLJ38379), misc_RNA [XR_108456]                   |
| A_33_P3325871  | 0,018945675 | down | -1,5846035 | FLJ38668 | PREDICTED: Homo sapiens uncharacterized LOC644903 (FLJ38668), misc_RNA [XR_244911]                  |
| A_33_P3347437  | 0,039484907 | down | -1,6276728 | FLJ39080 | Homo sapiens uncharacterized LOC441355 (FLJ39080), long non-coding RNA [NR_033830]                  |
| A_33_P3325843  | 0,004427913 | down | -1,8404075 | FLJ40039 | Homo sapiens cDNA FLJ40039 fis, clone SYNOV2000397. [AK097358]                                      |
| A_33_P3282291  | 1,44E-04    | down | -2,8809133 | FLJ40039 | Homo sapiens cDNA FLJ40039 fis, clone SYNOV2000397. [AK097358]                                      |
| A_19_P00810894 | 9,68E-04    | down | -1,9498805 | FLJ40288 | uncharacterized FLJ40288 [Source:EntrezGene;Acc:286023] [ENST00000573229]                           |
| A_24_P929322   | 0,007296097 | up   | 1,7061266  | FLJ42393 | Homo sapiens uncharacterized LOC401105 (FLJ42393), long non-coding RNA [NR_024413]                  |
| A_21_P0008871  | 0,011668701 | up   | 1,8319113  | FLJ42627 | Homo sapiens uncharacterized LOC645644 (FLJ42627), long non-coding RNA [NR_024492]                  |
| A_33_P3229452  | 0,00183783  | down | -2,3216498 | FLJ44477 | Homo sapiens cDNA FLJ44477 fis, clone UTERU2031703. [AK126441]                                      |
| A_33_P3229171  | 0,0102221   | up   | 1,6474235  | FLJ44635 | Homo sapiens TPT1-like protein (FLJ44635), mRNA [NM_207422]                                         |
| A_33_P3325029  | 0,043246366 | up   | 1,770173   | FLJ44674 | Homo sapiens cDNA FLJ44674 fis, clone BRACE3007649. [AK128747]                                      |
| A_33_P3356525  | 0,017334156 | up   | 1,9351741  | FLJ45482 | Homo sapiens cDNA FLJ45482 fis, clone BRTHA2001953. [AK127393]                                      |
| A_33_P3340808  | 0,003869844 | down | -2,694643  | FLJ46026 | PREDICTED: Homo sapiens FLJ46026 protein (FLJ46026), misc_RNA [XR_159298]                           |
| A_23_P211878   | 0,044934873 | up   | 1,7573129  | FLNB     | Homo sapiens filamin B, beta (FLNB), transcript variant 2, mRNA [NM_001457]                         |
| A_24_P253818   | 0,01833832  | down | -1,6042352 | FLOT2    | Homo sapiens flotillin 2 (FLOT2), mRNA [NM_004475]                                                  |
| A_21_P0000024  | 0,002637014 | up   | 2,4566004  | FLT1     | Homo sapiens fms-related tyrosine kinase 1 (FLT1), transcript variant 4, mRNA [NM_001160031]        |
| A_23_P356070   | 1,39E-04    | down | -3,4461544 | FLT4     | Homo sapiens fms-related tyrosine kinase 4 (FLT4), transcript variant 2, mRNA [NM_002020]           |
| A_24_P417596   | 0,04290036  | down | -2,0989215 | FLYWCH2  | Homo sapiens FLYWCH family member 2 (FLYWCH2), transcript variant 1, mRNA [NM_138439]               |
| A_33_P3404749  | 9,43E-04    | down | -1,7353859 | FMN1     | Homo sapiens formin 1 (FMN1), transcript variant 1, mRNA [NM_001277313]                             |
| A_33_P3219821  | 0,00569851  | up   | 1,5503658  | FMN2     | Homo sapiens formin 2 (FMN2), mRNA [NM_020066]                                                      |
| A_24_P390668   | 0,031658538 | up   | 1,8615139  | FMNL1    | Homo sapiens formin-like 1 (FMNL1), mRNA [NM_005892]                                                |
| A_32_P193080   | 0,019397354 | up   | 1,7342943  | FMNL2    | Homo sapiens formin-like 2 (FMNL2), mRNA [NM_052905]                                                |
| A_23_P149613   | 0,002766131 | down | -3,7661257 | FMO1     | Homo sapiens flavin containing monooxygenase 1 (FMO1), transcript variant 2, mRNA [NM_002021]       |
| A_33_P3285271  | 0,022303024 | down | -2,2103994 | FMO6P    | Homo sapiens flavin containing monooxygenase 6 pseudogene (FMO6P), non-coding RNA [NR_002601]       |
| A_24_P40417    | 0,005229462 | up   | 1,806462   | FMR1     | Homo sapiens fragile X mental retardation 1 (FMR1), transcript variant ISO1, mRNA [NM_002024]       |
| A_33_P3238785  | 7,42E-04    | down | -2,579514  | FMR1-AS1 | Homo sapiens FMR1 antisense RNA 1 (FMR1-AS1), transcript variant 1, long non-coding RNA [NR_024499] |
| A_23_P89215    | 1,19E-05    | down | -2,4766564 | FN3K     | Homo sapiens fructosamine 3 kinase (FN3K), mRNA [NM_022158]                                         |
| A_23_P417942   | 0,001492011 | up   | 1,7552344  | FNBP1L   | Homo sapiens formin binding protein 1-like (FNBP1L), transcript variant 1, mRNA [NM_001024948]      |
| A_23_P395595   | 0,004693421 | up   | 1,5741659  | FNBP4    | Homo sapiens formin binding protein 4 (FNBP4), mRNA [NM_015308]                                     |
| A_33_P3385656  | 0,004327302 | down | -2,3949888 | FNDC9    | Homo sapiens fibronectin type III domain containing 9 (FNDC9), mRNA [NM_001001343]                  |
| A_23_P47709    | 0,003013448 | down | -4,063029  | FOLR2    | Homo sapiens folate receptor 2 (fetal) (FOLR2), transcript variant 1, mRNA [NM_000803]              |
| A_24_P32935    | 0,015293999 | down | -2,112469  | FOLR2    | Homo sapiens folate receptor 2 (fetal) (FOLR2), transcript variant 1, mRNA [NM_000803]              |
| A_23_P37127    | 0,001005047 | up   | 1,8111105  | FOXA1    | Homo sapiens forkhead box A1 (FOXA1), mRNA [NM_004496]                                              |
| A_23_P413585   | 0,037297953 | down | -1,8295522 | FOXD2    | Homo sapiens forkhead box D2 (FOXD2), mRNA [NM_004474]                                              |
| A_33_P3293403  | 0,009727813 | down | -2,0014288 | FOXD4L5  | Homo sapiens forkhead box D4-like 5 (FOXD4L5), mRNA [NM_001126334]                                  |
| A_23_P118254   | 6,41E-05    | down | -3,0930185 | FOXF1    | Homo sapiens forkhead box F1 (FOXF1), mRNA [NM_001451]                                              |
| A_23_P82959    | 0,004538706 | down | -1,9072067 | FOXH1    | Homo sapiens forkhead box H1 (FOXH1), mRNA [NM_003923]                                              |
| A_24_P15391    | 0,002316359 | down | -1,8997567 | FOXI3    | Homo sapiens forkhead box I3 (FOXI3), mRNA [NM_001135649]                                           |
| A_24_P21985    | 0,003618163 | up   | 1,7873597  | FOXJ2    | Homo sapiens forkhead box J2 (FOXJ2), mRNA [NM_018416]                                              |
| A_24_P115199   | 3,85E-04    | up   | 2,0135167  | FOXX1    | Homo sapiens forkhead box K1 (FOXX1), mRNA [NM_001037165]                                           |

|                |                  |                     |                                                                                                                                          |
|----------------|------------------|---------------------|------------------------------------------------------------------------------------------------------------------------------------------|
| A_33_P3240392  | 0,023361523 up   | 1,7184272 FOXO3     | Homo sapiens forkhead box O3 (FOXO3), transcript variant 1, mRNA [NM_001455]                                                             |
| A_33_P3375665  | 0,023842458 up   | 1,7107227 FOXO3     | Homo sapiens forkhead box O3 (FOXO3), transcript variant 1, mRNA [NM_001455]                                                             |
| A_33_P3214303  | 0,002168996 down | -2,2630866 FOXP1    | Homo sapiens forkhead box P1 (FOXP1), transcript variant 3, mRNA [NM_001244808]                                                          |
| A_33_P3284019  | 1,58E-05 down    | -6,1766624 FOXP4    | Homo sapiens forkhead box P4 (FOXP4), transcript variant 1, mRNA [NM_001012426]                                                          |
| A_32_P164246   | 0,048351653 up   | 1,6154212 FOXQ1     | Homo sapiens forkhead box Q1 (FOXQ1), mRNA [NM_033260]                                                                                   |
| A_24_P204011   | 0,018628534 up   | 1,7592133 FOXR1     | Homo sapiens forkhead box R1 (FOXR1), mRNA [NM_181721]                                                                                   |
| A_23_P55649    | 0,007350548 down | -3,8598385 FPR2     | Homo sapiens formyl peptide receptor 2 (FPR2), transcript variant 1, mRNA [NM_001462]                                                    |
| A_33_P3247042  | 0,001502167 down | -2,5937939 FPR3     | Homo sapiens formyl peptide receptor 3 (FPR3), mRNA [NM_002030]                                                                          |
| A_33_P3261173  | 0,047491986 up   | 1,9127512 FRAT1     | Homo sapiens frequently rearranged in advanced T-cell lymphomas 1 (FRAT1), mRNA [NM_005479]                                              |
| A_33_P3212394  | 0,007186733 down | -2,02655 FRG2C      | Homo sapiens FSHD region gene 2 family, member C (FRG2C), mRNA [NM_001124759]                                                            |
| A_23_P133665   | 7,54E-04 up      | 2,4344623 FRK       | Homo sapiens fyn-related Src family tyrosine kinase (FRK), mRNA [NM_002031]                                                              |
| A_23_P81717    | 0,00256881 down  | -3,4555852 FRMD1    | Homo sapiens FERM domain containing 1 (FRMD1), transcript variant 1, mRNA [NM_024919]                                                    |
| A_33_P3406072  | 0,02642051 up    | 1,8330715 FRMD3     | Homo sapiens FERM domain containing 3 (FRMD3), transcript variant 2, mRNA [NM_001244959]                                                 |
| A_24_P67988    | 0,001290035 up   | 1,7496171 FRMD8     | Homo sapiens FERM domain containing 8 (FRMD8), transcript variant 1, mRNA [NM_031904]                                                    |
| A_32_P129669   | 1,06E-05 down    | -2,286693 FRMPD3    | Homo sapiens FERM and PDZ domain containing 3 (FRMPD3), mRNA [NM_032428]                                                                 |
| A_23_P140342   | 0,001789877 up   | 2,88348 FSCB        | Homo sapiens fibrous sheath CABYR binding protein (FSCB), mRNA [NM_032135]                                                               |
| A_33_P3241541  | 0,047440782 up   | 1,5365906 FSD1L     | Homo sapiens fibronectin type III and SPRY domain containing 1-like (FSD1L), transcript variant 3, mRNA [NM_001145313]                   |
| A_33_P3298326  | 0,008770271 up   | 1,5313987 FSHB      | Homo sapiens follicle stimulating hormone, beta polypeptide (FSHB), transcript variant 1, mRNA [NM_000510]                               |
| A_33_P3293773  | 0,010431117 down | -1,7891737 FSIIP2   | Homo sapiens fibrous sheath interacting protein 2 (FSIP2), mRNA [NM_173651]                                                              |
| A_24_P251734   | 0,03935817 up    | 1,845808 FSTL5      | Homo sapiens follistatin-like 5 (FSTL5), transcript variant 1, mRNA [NM_020116]                                                          |
| A_19_P00812340 | 0,028096678 down | -1,7524016 FTL      | Homo sapiens ferritin, light polypeptide (FTL), mRNA [NM_000146]                                                                         |
| A_23_P435833   | 8,07E-04 down    | -1,85859 FUBP3      | Homo sapiens far upstream element (FUSE) binding protein 3 (FUBP3), mRNA [NM_003934]                                                     |
| A_23_P106887   | 0,005512263 up   | 1,9124972 FUS       | Homo sapiens FUS RNA binding protein (FUS), transcript variant 1, mRNA [NM_004960]                                                       |
| A_33_P3748714  | 0,02899889 down  | -1,7335144 FUT10    | Homo sapiens fucosyltransferase 10 (alpha (1,3) fucosyltransferase) (FUT10), mRNA [NM_032664]                                            |
| A_33_P3354713  | 0,02359254 down  | -1,5208355 FUT11    | Homo sapiens fucosyltransferase 11 (alpha (1,3) fucosyltransferase) (FUT11), transcript variant 2, mRNA [NM_001284194]                   |
| A_23_P170534   | 2,54E-04 down    | -2,4924881 FUT7     | Homo sapiens fucosyltransferase 7 (alpha (1,3) fucosyltransferase) (FUT7), mRNA [NM_004479]                                              |
| A_23_P313632   | 0,007588525 down | -1,978376 FUT8      | Homo sapiens fucosyltransferase 8 (alpha (1,6) fucosyltransferase) (FUT8), transcript variant 1, mRNA [NM_178155]                        |
| A_24_P463891   | 0,00441719 up    | 2,0976708 FUT9      | Homo sapiens fucosyltransferase 9 (alpha (1,3) fucosyltransferase) (FUT9), mRNA [NM_006581]                                              |
| A_33_P3228435  | 0,047189698 down | -2,3280106 FXYP1    | Homo sapiens FXYP domain containing ion transport regulator 1 (FXYP1), transcript variant c, mRNA [NM_001278717]                         |
| A_23_P161769   | 1,09E-05 down    | -4,1996922 FXYP2    | Homo sapiens FXYP domain containing ion transport regulator 2 (FXYP2), transcript variant b, mRNA [NM_021603]                            |
| A_33_P3228445  | 0,045499567 up   | 1,7076968 FXYP2     | Homo sapiens FXYP domain containing ion transport regulator 2 (FXYP2), transcript variant a, mRNA [NM_001680]                            |
| A_23_P119611   | 3,11E-04 down    | -2,6833901 FXYP7    | Homo sapiens FXYP domain containing ion transport regulator 7 (FXYP7), mRNA [NM_022006]                                                  |
| A_21_P0007806  | 1,24E-04 up      | 3,559904 FZD10-AS1  | Homo sapiens FZD10 antisense RNA 1 (head to head) (FZD10-AS1), long non-coding RNA [NR_033834]                                           |
| A_21_P0007804  | 0,016386146 up   | 1,5877942 FZD10-AS1 | FZD10 antisense RNA 1 (head to head) [Source:HGNC Symbol;Acc:HGNC:48632] [ENST00000505807]                                               |
| A_24_P941759   | 0,015737474 up   | 1,8846071 G2E3      | Homo sapiens G2M-phase specific E3 ubiquitin protein ligase (G2E3), mRNA [NM_017769]                                                     |
| A_23_P203743   | 0,040838942 up   | 1,5975051 GAB2      | Homo sapiens GRB2-associated binding protein 2 (GAB2), transcript variant 2, mRNA [NM_012296]                                            |
| A_33_P3251369  | 0,010169972 up   | 1,6214709 GAB3      | Homo sapiens GRB2-associated binding protein 3 (GAB3), transcript variant 1, mRNA [NM_001081573]                                         |
| A_23_P93302    | 0,001983317 up   | 2,007925 GABBR1     | Homo sapiens gamma-aminobutyric acid (GABA) B receptor, 1 (GABBR1), transcript variant 1, mRNA [NM_001470]                               |
| A_24_P176255   | 6,24E-05 up      | 2,0033505 GABPB1    | Homo sapiens GA binding protein transcription factor, beta subunit 1 (GABPB1), transcript variant beta-1, mRNA [NM_005254]               |
| A_23_P125618   | 0,002921711 down | -2,8683338 GABRA3   | Homo sapiens gamma-aminobutyric acid (GABA) A receptor, alpha 3 (GABRA3), mRNA [NM_000808]                                               |
| A_32_P25514    | 0,048979037 down | -1,523449 GABRG2    | Homo sapiens gamma-aminobutyric acid (GABA) A receptor, gamma 2 (GABRG2), transcript variant 1, mRNA [NM_198904]                         |
| A_33_P3210805  | 0,025627023 up   | 2,3591926 GABRG3    | Homo sapiens gamma-aminobutyric acid (GABA) A receptor, gamma 3 (GABRG3), transcript variant 1, mRNA [NM_033223]                         |
| A_23_P93105    | 0,005064974 up   | 2,7371933 GABRR2    | Homo sapiens gamma-aminobutyric acid (GABA) A receptor, rho 2 (GABRR2), mRNA [NM_002043]                                                 |
| A_21_P0001900  | 5,92E-04 down    | -1,922291 GACAT1    | Homo sapiens gastric cancer associated transcript 1 (non-protein coding) (GACAT1), transcript variant 1, long non-coding RNA [NR_126369] |
| A_24_P239606   | 1,85E-05 up      | 2,6496363 GADD45B   | Homo sapiens growth arrest and DNA-damage-inducible, beta (GADD45B), mRNA [NM_015675]                                                    |
| A_33_P3409266  | 0,001433723 down | -3,112106 GAF2      | Homo sapiens FG-2 activity-associated protein 2 (GAF2) mRNA, complete cds. [AF220234]                                                    |
| A_24_P228796   | 0,02810782 up    | 2,7754824 GAGE7     | Homo sapiens G antigen 7 (GAGE7), mRNA [NM_021123]                                                                                       |
| A_33_P3275390  | 0,006148054 up   | 1,989173 GAL3ST3    | Homo sapiens galactose-3-O-sulfotransferase 3 (GAL3ST3), mRNA [NM_033036]                                                                |
| A_23_P212119   | 0,002652666 up   | 2,5316937 GALNT15   | Homo sapiens polypeptide N-acetylgalactosaminyltransferase 15 (GALNT15), mRNA [NM_054110]                                                |
| A_23_P76749    | 0,00141386 down  | -3,1896255 GALNT16  | Homo sapiens polypeptide N-acetylgalactosaminyltransferase 16 (GALNT16), transcript variant 2, mRNA [NM_020692]                          |
| A_24_P353794   | 0,016806483 up   | 2,1543794 GALNT2    | Homo sapiens polypeptide N-acetylgalactosaminyltransferase 2 (GALNT2), transcript variant 1, mRNA [NM_004481]                            |
| A_24_P942370   | 0,022877907 up   | 1,8416846 GALNT4    | Homo sapiens polypeptide N-acetylgalactosaminyltransferase 4 (GALNT4), mRNA [NM_003774]                                                  |
| A_23_P65100    | 0,043815847 up   | 1,6851047 GALNT8    | Homo sapiens polypeptide N-acetylgalactosaminyltransferase 8 (GALNT8), mRNA [NM_017417]                                                  |
| A_33_P3355933  | 0,009397322 down | -1,7762246 GALNT9   | polypeptide N-acetylgalactosaminyltransferase 9 [Source:HGNC Symbol;Acc:HGNC:4131] [ENST00000614360]                                     |
| A_19_P00322242 | 0,00233029 down  | -1,6707494 GALNT9   | Homo sapiens polypeptide N-acetylgalactosaminyltransferase 9 (GALNT9), transcript variant A, mRNA [NM_001122636]                         |
| A_19_P00327126 | 0,01112599 down  | -2,2553372 GALNT9   | Homo sapiens polypeptide N-acetylgalactosaminyltransferase 9 (GALNT9), transcript variant A, mRNA [NM_001122636]                         |
| A_23_P429601   | 0,03693305 up    | 1,5900459 GALNTL5   | Homo sapiens polypeptide N-acetylgalactosaminyltransferase-like 5 (GALNTL5), transcript variant 1, mRNA [NM_145292]                      |
| A_23_P77756    | 0,015098353 down | -1,8882959 GALR2    | Homo sapiens galanin receptor 2 (GALR2), mRNA [NM_003857]                                                                                |
| A_23_P256663   | 0,003986001 down | -2,35315 GALR3      | Homo sapiens galanin receptor 3 (GALR3), mRNA [NM_003614]                                                                                |
| A_33_P3265159  | 0,047689028 up   | 1,5113626 GAPVD1    | Homo sapiens cDNA clone IMAGE:5203707, containing frame-shift errors. [BC110990]                                                         |
| A_23_P372660   | 9,18E-05 up      | 1,8971967 GAPVD1    | Homo sapiens GTPase activating protein and VPS9 domains 1 (GAPVD1), transcript variant 4, mRNA [NM_015635]                               |

|                |                  |                     |                                                                                                                                        |
|----------------|------------------|---------------------|----------------------------------------------------------------------------------------------------------------------------------------|
| A_21_P0000680  | 0,021143526 up   | 1,6370286 GAS5-AS1  | Homo sapiens GAS5 antisense RNA 1 (GAS5-AS1), long non-coding RNA [NR_037605]                                                          |
| A_33_P3266192  | 0,008735375 up   | 2,2319102 GAS6-AS1  | Homo sapiens hypothetical LOC650669, mRNA (cDNA clone MGC:169000 IMAGE:9021377), complete cds. [BC137379]                              |
| A_33_P3352522  | 8,76E-04 up      | 3,0857325 GAS6-AS1  | Homo sapiens cDNA FLJ35543 fis, clone SPLEN2002957. [AK092862]                                                                         |
| A_23_P159191   | 0,014197458 down | -1,9814205 GAST     | Homo sapiens gastrin (GAST), mRNA [NM_000805]                                                                                          |
| A_33_P3550894  | 0,007920567 up   | 3,3181272 GATA2     | Homo sapiens GATA binding protein 2 (GATA2), transcript variant 1, mRNA [NM_001145661]                                                 |
| A_21_P0014114  | 0,031014336 up   | 2,3775504 GATA2-AS1 | Homo sapiens GATA2 antisense RNA 1 (GATA2-AS1), long non-coding RNA [NR_125398]                                                        |
| A_33_P3613516  | 0,005997577 up   | 1,9766632 GATA2-AS1 | Homo sapiens cDNA: FLJ21000 fis, clone CAE03359. [AK024653]                                                                            |
| A_21_P0006622  | 0,007651915 up   | 1,5847104 GATA3-AS1 | Homo sapiens GATA3 antisense RNA 1 (GATA3-AS1), transcript variant 1, long non-coding RNA [NR_104327]                                  |
| A_23_P131020   | 0,007460038 up   | 1,6193429 GATAD2A   | Homo sapiens GATA zinc finger domain containing 2A (GATAD2A), transcript variant 2, mRNA [NM_017660]                                   |
| A_23_P327777   | 0,022931254 up   | 1,907041 GATS       | Homo sapiens GATS, stromal antigen 3 opposite strand (GATS), transcript variant 1, mRNA [NM_178831]                                    |
| A_24_P341187   | 8,76E-04 up      | 2,0459318 GBA2      | Homo sapiens glucosidase, beta (bile acid) 2 (GBA2), mRNA [NM_020944]                                                                  |
| A_23_P18672    | 0,002874911 down | -2,0285633 GBA3     | Homo sapiens glucosidase, beta, acid 3 (gene/pseudogene) (GBA3), transcript variant 1, mRNA [NM_020973]                                |
| A_19_P00808588 | 0,001536843 down | -2,772137 GBP1P1    | Homo sapiens guanylate binding protein 1, interferon-inducible pseudogene 1 (GBP1P1), non-coding RNA [NR_003133]                       |
| A_24_P309069   | 0,026806865 up   | 1,9763068 GBX1      | Homo sapiens gastrulation brain homeobox 1 (GBX1), mRNA [NM_001098834]                                                                 |
| A_24_P85942    | 0,031765655 up   | 1,7461706 GCC2      | Homo sapiens GRIP and coiled-coil domain containing 2 (GCC2), transcript variant 1, mRNA [NM_181453]                                   |
| A_21_P0000149  | 0,023415644 down | -1,515101 GCFC2     | Homo sapiens GC-rich sequence DNA-binding factor 2 (GCFC2), transcript variant 3, mRNA [NM_001201335]                                  |
| A_33_P3298460  | 0,001627946 up   | 1,7978699 GCG       | Homo sapiens glucagon (GCG), mRNA [NM_002054]                                                                                          |
| A_33_P3342260  | 0,025767755 down | -1,618017 GCK       | Homo sapiens glucokinase (hexokinase 4) (GCK), transcript variant 1, mRNA [NM_000162]                                                  |
| A_23_P119886   | 0,009353855 up   | 2,7956314 GCKR      | Homo sapiens glucokinase (hexokinase 4) regulator (GCKR), mRNA [NM_001486]                                                             |
| A_32_P98732    | 0,001170277 down | -1,7013136 GCM1     | Homo sapiens glial cells missing homolog 1 (Drosophila) (GCM1), mRNA [NM_003643]                                                       |
| A_33_P3411204  | 3,24E-04 down    | -1,8942883 GCNT2    | Homo sapiens glucosaminyl (N-acetyl) transferase 2, l-branching enzyme (I blood group) (GCNT2), transcript variant 2, mRNA [NM_001491] |
| A_33_P3282522  | 0,011933794 up   | 1,5805343 GCNT7     | Homo sapiens glucosaminyl (N-acetyl) transferase family member 7 (GCNT7), mRNA [NM_080615]                                             |
| A_24_P393571   | 0,033864994 up   | 2,6382973 GDA       | Homo sapiens guanine deaminase (GDA), transcript variant 2, mRNA [NM_004293]                                                           |
| A_33_P3331767  | 0,01592533 up    | 1,5423998 GDAP1L1   | Homo sapiens ganglioside induced differentiation associated protein 1-like 1 (GDAP1L1), transcript variant 5, mRNA [NM_001256740]      |
| A_23_P46755    | 0,00619766 down  | -2,0526762 GDF2     | Homo sapiens growth differentiation factor 2 (GDF2), mRNA [NM_016204]                                                                  |
| A_23_P72817    | 0,004251664 up   | 2,0742042 GDF3      | Homo sapiens growth differentiation factor 3 (GDF3), mRNA [NM_020634]                                                                  |
| A_23_P259955   | 0,00495404 down  | -1,8451531 GDF5     | Homo sapiens growth differentiation factor 5 (GDF5), mRNA [NM_000557]                                                                  |
| A_33_P3406240  | 8,33E-04 down    | -2,432216 GDF7      | Homo sapiens growth differentiation factor 7 (GDF7), mRNA [NM_182828]                                                                  |
| A_23_P161446   | 0,007686908 up   | 1,6648022 GDI2      | Homo sapiens GDP dissociation inhibitor 2 (GDI2), transcript variant 1, mRNA [NM_001494]                                               |
| A_19_P00322166 | 0,044912465 up   | 3,2015655 GDNF-AS1  | Homo sapiens GDNF antisense RNA 1 (head to head) (GDNF-AS1), transcript variant 1, mRNA [NM_001278094]                                 |
| A_21_P0004501  | 3,79E-04 up      | 1,8827144 GDNF-AS1  | Homo sapiens GDNF antisense RNA 1 (head to head) (GDNF-AS1), transcript variant GDNFOS, non-coding RNA [NR_103442]                     |
| A_33_P3258330  | 0,002125959 down | -1,8680649 GDDP5    | Homo sapiens glycerophosphodiester phosphodiesterase domain containing 5 (GDDP5), mRNA [NM_030792]                                     |
| A_23_P89910    | 0,001146262 up   | 1,5790973 GEMIN7    | Homo sapiens germ (nuclear organelle) associated protein 7 (GEMIN7), transcript variant 1, mRNA [NM_024707]                            |
| A_23_P257365   | 0,00192961 up    | 1,8662931 GF1I      | Homo sapiens growth factor independent 1 transcription repressor (GF1I), transcript variant 1, mRNA [NM_005263]                        |
| A_33_P3639068  | 0,012118743 down | -2,452989 GFRA1     | Homo sapiens GDNF family receptor alpha 1 (GFRA1), transcript variant 1, mRNA [NM_005264]                                              |
| A_33_P3293336  | 0,013639861 down | -1,9114004 GFRA1    | Homo sapiens GDNF family receptor alpha 1 (GFRA1), transcript variant 1, mRNA [NM_005264]                                              |
| A_33_P3317580  | 0,00260289 down  | -1,5988168 GFRA2    | Homo sapiens GDNF family receptor alpha 2 (GFRA2), transcript variant 1, mRNA [NM_001495]                                              |
| A_33_P3345051  | 0,03539785 down  | -1,8015491 GFY      | Homo sapiens golgi-associated, olfactory signaling regulator (GFY), mRNA [NM_001195256]                                                |
| A_24_P926400   | 9,36E-05 up      | 2,0868938 GGA1      | golgi-associated, gamma adaptin ear containing, ARF binding protein 1 [Source:HGNC Symbol;Acc:HGNC:17842] [ENST00000489772]            |
| A_33_P3301485  | 0,027455045 up   | 1,570191 GGA1       | golgi-associated, gamma adaptin ear containing, ARF binding protein 1 [Source:HGNC Symbol;Acc:HGNC:17842] [ENST00000491295]            |
| A_23_P38181    | 6,09E-05 up      | 1,8353864 GGA3      | Homo sapiens golgi-associated, gamma adaptin ear containing, ARF binding protein 3 (GGA3), transcript variant long, mRNA [NM_138619]   |
| A_19_P00809029 | 0,004376513 down | -1,9679946 GGACT    | Homo sapiens gamma-glutamylamine cyclotransferase (GGACT), transcript variant 2, mRNA [NM_001195087]                                   |
| A_33_P3369790  | 0,001721148 down | -2,172858 GGN       | Homo sapiens gametogenetin (GGN), mRNA [NM_152657]                                                                                     |
| A_24_P606538   | 3,50E-04 down    | -7,4479575 GGNBP1   | Homo sapiens gametogenetin binding protein 1 (pseudogene) (GGNBP1), non-coding RNA [NR_028361]                                         |
| A_21_P0012283  | 0,005808626 down | -1,8766586 GGT1     | Homo sapiens gamma-glutamyltransferase 1 (GGT1), transcript variant 6, mRNA [NM_001288833]                                             |
| A_33_P3255304  | 0,01671425 up    | 3,1028264 GGT5      | Homo sapiens gamma-glutamyltransferase 5 (GGT5), transcript variant 1, mRNA [NM_001099781]                                             |
| A_23_P112452   | 0,00118785 down  | -2,6855805 GGTA1P   | Homo sapiens glycoprotein, alpha-galactosyltransferase 1 pseudogene (GGTA1P), transcript variant 1, non-coding RNA [NR_003191]         |
| A_33_P3389008  | 2,26E-04 down    | -2,9363604 GHITM    | Homo sapiens growth hormone inducible transmembrane protein (GHITM), mRNA [NM_014394]                                                  |
| A_33_P3260733  | 0,017230097 down | -1,8564405 GHR      | Homo sapiens growth hormone receptor (GHR), transcript variant 12, mRNA [NM_001242462]                                                 |
| A_33_P3391826  | 9,20E-04 down    | -2,3660154 GHRH     | Homo sapiens growth hormone releasing hormone (GHRH), transcript variant 1, mRNA [NM_021081]                                           |
| A_33_P3232655  | 0,04055595 down  | -1,7404616 GHRHR    | Homo sapiens growth hormone releasing hormone receptor (GHRHR), mRNA [NM_000823]                                                       |
| A_23_P40956    | 0,016927265 down | -1,7253838 GHRL     | Homo sapiens ghrelin/obestatin prepropeptide (GHRL), transcript variant 1, mRNA [NM_016362]                                            |
| A_33_P3261620  | 0,007403389 down | -1,9328339 GHRSR    | Homo sapiens growth hormone secretagogue receptor (GHSR), transcript variant 1b, mRNA [NM_004122]                                      |
| A_24_P274831   | 0,016501527 up   | 1,5041035 GIMAP7    | Homo sapiens GTPase, IMAP family member 7 (GIMAP7), mRNA [NM_153236]                                                                   |
| A_21_P0012784  | 0,013513634 up   | 1,5857635 GIMD1     | Homo sapiens GIMAP family P-loop NTPase domain containing 1 (GIMD1), mRNA [NM_001195138]                                               |
| A_21_P0000123  | 0,004458814 up   | 1,5180712 GIMD1     | Homo sapiens GIMAP family P-loop NTPase domain containing 1 (GIMD1), mRNA [NM_001195138]                                               |
| A_33_P3340025  | 0,01172148 up    | 1,5093861 GINS1     | Homo sapiens GINS complex subunit 1 (Psf1 homolog) (GINS1), mRNA [NM_021067]                                                           |
| A_33_P3340040  | 0,001791175 up   | 2,1294875 GINS4     | Homo sapiens GINS complex subunit 4 (Sld5 homolog) (GINS4), mRNA [NM_032336]                                                           |
| A_24_P118527   | 0,003569122 down | -2,7951174 GIPC3    | Homo sapiens GIPC PDZ domain containing family, member 3 (GIPC3), mRNA [NM_133261]                                                     |
| A_24_P373768   | 0,003562748 down | -1,9710605 GIPR     | Homo sapiens gastric inhibitory polypeptide receptor (GIPR), mRNA [NM_000164]                                                          |
| A_33_P3401673  | 0,011017551 down | -1,5706959 GIT1     | Homo sapiens G protein-coupled receptor kinase interacting ArfGAP 1 (GIT1), transcript variant 2, mRNA [NM_014030]                     |

|               |                  |                      |                                                                                                                                                       |
|---------------|------------------|----------------------|-------------------------------------------------------------------------------------------------------------------------------------------------------|
| A_23_P204436  | 0,001229069 up   | 1,6251062 GIT2       | Homo sapiens G protein-coupled receptor kinase interacting ArfGAP 2 (GIT2), transcript variant 4, mRNA [NM_139201]                                    |
| A_23_P371729  | 7,55E-04 up      | 3,0301702 GJA5       | Homo sapiens gap junction protein, alpha 5, 40kDa (GJA5), transcript variant A, mRNA [NM_005266]                                                      |
| A_23_P23037   | 0,001049121 down | -4,8213058 GJA8      | Homo sapiens gap junction protein, alpha 8, 50kDa (GJA8), mRNA [NM_005267]                                                                            |
| A_23_P74828   | 0,009174958 down | -1,5511122 GJA9      | Homo sapiens gap junction protein, alpha 9, 59kDa (GJA9), mRNA [NM_030772]                                                                            |
| A_24_P404840  | 0,036449272 up   | 2,46556 GJB1         | Homo sapiens gap junction protein, beta 1, 32kDa (GJB1), transcript variant 2, mRNA [NM_000166]                                                       |
| A_24_P379233  | 0,008738674 up   | 1,7165059 GJB3       | Homo sapiens gap junction protein, beta 3, 31kDa (GJB3), transcript variant 1, mRNA [NM_024009]                                                       |
| A_33_P3273777 | 0,003252058 up   | 1,7110896 GJB7       | Homo sapiens gap junction protein, beta 7, 25kDa (GJB7), mRNA [NM_198568]                                                                             |
| A_23_P30983   | 0,008841389 up   | 2,3704643 GJB7       | Homo sapiens gap junction protein, beta 7, 25kDa (GJB7), mRNA [NM_198568]                                                                             |
| A_24_P43723   | 0,00458878 down  | -2,595548 GJC3       | Homo sapiens gap junction protein, gamma 3, 30.2kDa (GJC3), mRNA [NM_181538]                                                                          |
| A_33_P3264790 | 0,003311693 down | -2,27699 GJD4        | Homo sapiens gap junction protein, delta 4, 40.1kDa, mRNA (cDNA clone IMAGE:5240397), partial cds. [BC035898]                                         |
| A_32_P172848  | 0,03154166 down  | -1,6203784 GK        | Homo sapiens glycerol kinase (GK), transcript variant 2, mRNA [NM_000167]                                                                             |
| A_33_P3779229 | 7,77E-05 up      | 1,819968 GK5         | Homo sapiens glycerol kinase 5 (putative) (GK5), transcript variant 1, mRNA [NM_001039547]                                                            |
| A_23_P218579  | 0,013944304 down | -1,7987121 GLB1L     | Homo sapiens galactosidase, beta 1-like (GLB1L), transcript variant 2, mRNA [NM_024506]                                                               |
| A_23_P151870  | 0,013529988 up   | 1,708478 GLCE        | Homo sapiens glucuronic acid epimerase (GLCE), mRNA [NM_015554]                                                                                       |
| A_23_P105251  | 0,044350248 down | -2,2113159 GLI1      | Homo sapiens GLI family zinc finger 1 (GLI1), transcript variant 1, mRNA [NM_005269]                                                                  |
| A_33_P3285715 | 3,72E-04 down    | -2,8884506 GLI4      | GLI family zinc finger 4 [Source:HGNC Symbol;Acc:HGNC:4320] [ENST00000523812]                                                                         |
| A_23_P317839  | 0,014000998 up   | 1,7146568 GLIPR1L1   | Homo sapiens GLI pathogenesis-related 1 like 1 (GLIPR1L1), mRNA [NM_152779]                                                                           |
| A_33_P3295749 | 0,045004267 down | -1,7896079 GLIPR1L2  | Homo sapiens GLI pathogenesis-related 1 like 2 (GLIPR1L2), transcript variant 3, non-coding RNA [NR_072995]                                           |
| A_23_P316612  | 0,006853018 down | -1,9681526 GLIS1     | Homo sapiens GLIS family zinc finger 1 (GLIS1), mRNA [NM_147193]                                                                                      |
| A_33_P3326568 | 0,03171113 down  | -1,9440285 GLIS3     | GLIS family zinc finger 3 [Source:HGNC Symbol;Acc:HGNC:28510] [ENST00000467497]                                                                       |
| A_23_P312837  | 0,023104616 up   | 2,65419 GLIS3-AS1    | Homo sapiens GLIS3 antisense RNA 1 (GLIS3-AS1), long non-coding RNA [NR_026663]                                                                       |
| A_23_P69908   | 0,027346017 up   | 1,9260375 GLRX       | Homo sapiens glutaredoxin (thioltransferase) (GLRX), transcript variant 1, mRNA [NM_002064]                                                           |
| A_33_P3379916 | 0,008340247 up   | 1,581214 GLS         | Homo sapiens glutaminase (GLS), transcript variant 1, mRNA [NM_014905]                                                                                |
| A_33_P3390391 | 0,013024476 up   | 1,5270689 GLTSCR1    | Homo sapiens glioma tumor suppressor candidate region gene 1 (GLTSCR1), mRNA [NM_015711]                                                              |
| A_33_P3295148 | 0,001163628 down | -2,2113628 GLUD1P3   | Homo sapiens glutamate dehydrogenase 1 pseudogene 3 (GLUD1P3), non-coding RNA [NR_048575]                                                             |
| A_21_P0010921 | 0,002934405 down | -1,5741236 GLUD1P7   | Homo sapiens glutamate dehydrogenase 1 pseudogene 7 (GLUD1P7), non-coding RNA [NR_111968]                                                             |
| A_24_P53976   | 0,001629973 up   | 3,2393265 GLUL       | Homo sapiens glutamate-ammonia ligase (GLUL), transcript variant 1, mRNA [NM_002065]                                                                  |
| A_24_P385092  | 0,020599626 up   | 1,9363577 GLYCAM1    | Homo sapiens glycosylation dependent cell adhesion molecule 1 (pseudogene) (GLYCAM1), non-coding RNA [NR_003039]                                      |
| A_33_P3227440 | 0,001511871 up   | 2,3171763 GM140      | Homo sapiens uncharacterized LOC100287948 (GM140), long non-coding RNA [NR_046249]                                                                    |
| A_21_P0004821 | 0,011309111 down | -2,141949 GMDS-AS1   | Homo sapiens GMDS antisense RNA 1 (head to head) (GMDS-AS1), long non-coding RNA [NR_046229]                                                          |
| A_21_P0004594 | 0,018287726 down | -1,7500677 GMDS-AS1  | Homo sapiens GMDS antisense RNA 1 (head to head) (GMDS-AS1), long non-coding RNA [NR_046229]                                                          |
| A_21_P0004819 | 0,00762791 down  | -2,883862 GMDS-AS1   | Homo sapiens GMDS antisense RNA 1 (head to head) (GMDS-AS1), long non-coding RNA [NR_046229]                                                          |
| A_23_P208866  | 0,049594626 down | -1,9756324 GMFG      | Homo sapiens glia maturation factor, gamma (GMFG), transcript variant 1, mRNA [NM_004877]                                                             |
| A_23_P92202   | 0,012280559 down | -1,5003216 GMPPB     | Homo sapiens GDP-mannose pyrophosphorylase B (GMPPB), transcript variant 2, mRNA [NM_021971]                                                          |
| A_24_P277657  | 0,00635613 up    | 3,2374477 GMPR       | Homo sapiens guanosine monophosphate reductase (GMPR), mRNA [NM_006877]                                                                               |
| A_24_P150874  | 1,52E-04 up      | 1,83957 GNA13        | Homo sapiens guanine nucleotide binding protein (G protein), alpha 13 (GNA13), transcript variant 1, mRNA [NM_006572]                                 |
| A_24_P415150  | 0,008021111 up   | 1,6190535 GNA14      | Homo sapiens guanine nucleotide binding protein (G protein), alpha 14 (GNA14), mRNA [NM_004297]                                                       |
| A_33_P3419339 | 0,005463831 up   | 1,5613573 GNAI3      | Homo sapiens guanine nucleotide binding protein (G protein), alpha inhibiting activity polypeptide 3 (GNAI3), mRNA [NM_006496]                        |
| A_24_P393611  | 5,31E-04 down    | -1,9059224 GNAO1     | Homo sapiens guanine nucleotide binding protein (G protein), alpha activating activity polypeptide O (GNAO1), transcript variant 2, mRNA [NM_138736]  |
| A_33_P3404814 | 0,014360598 up   | 1,9089407 GNAO1      | Homo sapiens guanine nucleotide binding protein (G protein), alpha activating activity polypeptide O (GNAO1), transcript variant 1, mRNA [NM_020988]  |
| A_24_P418809  | 0,02605408 up    | 1,5298349 GNAS       | Homo sapiens GNAS complex locus (GNAS), transcript variant 7, mRNA [NM_001077489]                                                                     |
| A_23_P166884  | 0,002147384 up   | 2,1037886 GNAT1      | Homo sapiens guanine nucleotide binding protein (G protein), alpha transducing activity polypeptide 1 (GNAT1), transcript variant 2, mRNA [NM_000172] |
| A_33_P3232937 | 4,10E-05 down    | -2,4412806 GNG12-AS1 | Homo sapiens GNG12 antisense RNA 1 (GNG12-AS1), long non-coding RNA [NR_040077]                                                                       |
| A_23_P26994   | 0,013854917 up   | 1,5970473 GNGT2      | Homo sapiens guanine nucleotide binding protein (G protein), gamma transducing activity polypeptide 2 (GNGT2), transcript variant 1, mRNA [NM_031498] |
| A_23_P41025   | 0,008901925 up   | 1,6051912 GNL3       | Homo sapiens guanine nucleotide binding protein-like 3 (nucleolar) (GNL3), transcript variant 1, mRNA [NM_014366]                                     |
| A_23_P254594  | 0,016588513 up   | 1,8471657 GNRH1      | Homo sapiens gonadotropin-releasing hormone 1 (luteinizing-releasing hormone) (GNRH1), transcript variant 1, mRNA [NM_000825]                         |
| A_33_P3418790 | 9,95E-04 down    | -2,535362 GNRH2      | gonadotropin-releasing hormone 2 [Source:HGNC Symbol;Acc:HGNC:4420] [ENST00000380347]                                                                 |
| A_24_P341535  | 0,006689819 down | -1,5202242 GOLGA2P7  | Homo sapiens golgin A2 pseudogene 7 (GOLGA2P7), non-coding RNA [NR_027001]                                                                            |
| A_33_P3220020 | 0,00261392 down  | -2,3369923 GOLGA2P9  | Homo sapiens golgin A2 pseudogene 9 (GOLGA2P9), non-coding RNA [NR_033899]                                                                            |
| A_33_P3259440 | 0,008460073 up   | 2,6569686 GOLGA6A    | Homo sapiens golgin A6 family, member A (GOLGA6A), mRNA [NM_001038640]                                                                                |
| A_33_P3250268 | 2,97E-04 down    | -2,456583 GOLGA6L7P  | golgin A6 family-like 7, pseudogene [Source:HGNC Symbol;Acc:HGNC:37442] [ENST00000567390]                                                             |
| A_33_P3383796 | 0,011694315 down | -2,3258135 GOLGA7B   | Homo sapiens golgin A7 family, member B (GOLGA7B), mRNA [NM_001010917]                                                                                |
| A_32_P119569  | 0,017129513 down | -2,1709645 GOLGA8EP  | Homo sapiens golgin A8 family, member E, pseudogene (GOLGA8EP), non-coding RNA [NR_033350]                                                            |
| A_21_P0011355 | 0,007065025 down | -1,7510203 GOLGA8K   | Homo sapiens golgin A8 family, member K (GOLGA8K), mRNA [NM_001282493]                                                                                |
| A_23_P140614  | 0,007897202 down | -1,8720249 GOLGA8O   | Homo sapiens golgin A8 family, member O (GOLGA8O), mRNA [NM_001277308]                                                                                |
| A_23_P146512  | 5,16E-05 up      | 1,9917469 GOLM1      | Homo sapiens golgi membrane protein 1 (GOLM1), transcript variant 1, mRNA [NM_016548]                                                                 |
| A_23_P63825   | 0,037946623 down | -1,5756027 GOT1      | Homo sapiens glutamic-oxaloacetic transaminase 1, soluble (GOT1), mRNA [NM_002079]                                                                    |
| A_33_P3461416 | 0,043583944 up   | 1,8938205 GP6        | Homo sapiens glycoprotein VI (platelet) (GP6), transcript variant 1, mRNA [NM_001083899]                                                              |
| A_33_P3383226 | 5,82E-06 down    | -3,3479235 GP9       | Homo sapiens glycoprotein IX (platelet) (GP9), mRNA [NM_000174]                                                                                       |
| A_23_P68240   | 5,58E-04 down    | -2,119454 GPAT2      | Homo sapiens glycerol-3-phosphate acyltransferase 2, mitochondrial (GPAT2), mRNA [NM_207328]                                                          |
| A_33_P3210671 | 0,001814864 down | -2,1337194 GPAT2     | Homo sapiens glycerol-3-phosphate acyltransferase 2, mitochondrial (GPAT2), mRNA [NM_207328]                                                          |



|               |             |      |            |          |                                                                                                                                          |
|---------------|-------------|------|------------|----------|------------------------------------------------------------------------------------------------------------------------------------------|
| A_33_P3218301 | 0,001165541 | down | -2,2128273 | GPAT2    | PREDICTED: Homo sapiens glycerol-3-phosphate acyltransferase 2, mitochondrial (GPAT2), transcript variant X14, mRNA [XM_006712308]       |
| A_33_P3292812 | 0,004987279 | up   | 1,7472413  | GPATCH2L | Homo sapiens G patch domain containing 2-like (GPATCH2L), transcript variant 2, mRNA [NM_017972]                                         |
| A_24_P359117  | 0,001313573 | up   | 1,5446315  | GPATCH8  | Homo sapiens G patch domain containing 8 (GPATCH8), transcript variant 1, mRNA [NM_001002909]                                            |
| A_23_P593     | 0,004384307 | up   | 1,5407459  | GPBP1L1  | Homo sapiens GC-rich promoter binding protein 1-like 1 (GPBP1L1), mRNA [NM_021639]                                                       |
| A_33_P3230264 | 1,50E-04    | down | -2,9927914 | GPC3     | Homo sapiens glypican 3 (GPC3), transcript variant 1, mRNA [NM_001164617]                                                                |
| A_23_P371682  | 0,042187512 | down | -2,015897  | GPC6     | Homo sapiens glypican 6 (GPC6), mRNA [NM_005708]                                                                                         |
| A_23_P8640    | 0,024457503 | down | -2,1534204 | GPER1    | Homo sapiens G protein-coupled estrogen receptor 1 (GPER1), transcript variant 3, mRNA [NM_001039966]                                    |
| A_33_P3345816 | 0,00127806  | down | -2,682225  | GPER1    | Homo sapiens G protein-coupled estrogen receptor 1 (GPER1), transcript variant 3, mRNA [NM_001039966]                                    |
| A_23_P47181   | 0,002771839 | down | -2,5075548 | GPHA2    | Homo sapiens glycoprotein hormone alpha 2 (GPHA2), mRNA [NM_130769]                                                                      |
| A_23_P214267  | 0,010044016 | up   | 1,5787207  | GPR110   | Homo sapiens G protein-coupled receptor 110 (GPR110), transcript variant 1, mRNA [NM_153840]                                             |
| A_24_P85881   | 2,66E-05    | down | -3,1183107 | GPR113   | Homo sapiens G protein-coupled receptor 113 (GPR113), transcript variant 3, mRNA [NM_153835]                                             |
| A_23_P21425   | 1,42E-04    | down | -2,163482  | GPR119   | Homo sapiens G protein-coupled receptor 119 (GPR119), mRNA [NM_178471]                                                                   |
| A_24_P411749  | 0,003951041 | up   | 1,5663688  | GPR126   | Homo sapiens G protein-coupled receptor 126 (GPR126), transcript variant a1, mRNA [NM_020455]                                            |
| A_23_P128808  | 0,019218048 | down | -2,0662374 | GPR132   | Homo sapiens G protein-coupled receptor 132 (GPR132), transcript variant 2, mRNA [NM_013345]                                             |
| A_33_P3391135 | 0,027703986 | down | -1,663206  | GPR133   | Homo sapiens G protein-coupled receptor 133 (GPR133), mRNA [NM_198827]                                                                   |
| A_33_P3237110 | 0,009549045 | up   | 1,80922    | GPR137C  | Homo sapiens G protein-coupled receptor 137C (GPR137C), mRNA [NM_001099652]                                                              |
| A_33_P3317508 | 0,001893246 | up   | 1,8895388  | GPR148   | Homo sapiens G protein-coupled receptor 148 (GPR148), mRNA [NM_207364]                                                                   |
| A_23_P6943    | 0,01268652  | down | -2,360718  | GPR15    | Homo sapiens G protein-coupled receptor 15 (GPR15), mRNA [NM_005290]                                                                     |
| A_33_P3243420 | 0,001381921 | down | -1,7274574 | GPR152   | Homo sapiens G protein-coupled receptor 152 (GPR152), mRNA [NM_206997]                                                                   |
| A_33_P3236846 | 0,015782857 | down | -1,7127675 | GPR17    | Homo sapiens G protein-coupled receptor 17 (GPR17), transcript variant 1, mRNA [NM_001161415]                                            |
| A_23_P37676   | 4,31E-05    | down | -3,264633  | GPR176   | Homo sapiens G protein-coupled receptor 176 (GPR176), transcript variant 1, mRNA [NM_007223]                                             |
| A_23_P135219  | 0,001668293 | down | -2,1915994 | GPR21    | Homo sapiens G protein-coupled receptor 21 (GPR21), mRNA [NM_005294]                                                                     |
| A_23_P316531  | 0,005174169 | down | -1,5560902 | GPR25    | Homo sapiens G protein-coupled receptor 25 (GPR25), mRNA [NM_005298]                                                                     |
| A_23_P385835  | 0,016364418 | up   | 1,7857974  | GPR27    | Homo sapiens G protein-coupled receptor 27 (GPR27), mRNA [NM_018971]                                                                     |
| A_23_P35000   | 0,029483926 | down | -1,6234807 | GPR3     | Homo sapiens G protein-coupled receptor 3 (GPR3), mRNA [NM_005281]                                                                       |
| A_21_P0000136 | 0,002551375 | up   | 1,5681198  | GPR33    | Homo sapiens G protein-coupled receptor 33 (gene/pseudogene) (GPR33), transcript variant 1, mRNA [NM_001197184]                          |
| A_23_P131534  | 0,043139283 | down | -2,7964563 | GPR45    | Homo sapiens G protein-coupled receptor 45 (GPR45), mRNA [NM_007227]                                                                     |
| A_23_P159721  | 3,25E-04    | down | -3,7544026 | GPR50    | Homo sapiens G protein-coupled receptor 50 (GPR50), mRNA [NM_004224]                                                                     |
| A_33_P3345469 | 0,006971665 | up   | 1,563693   | GPR6     | Homo sapiens G protein-coupled receptor 6 (GPR6), transcript variant 1, mRNA [NM_001286099]                                              |
| A_23_P214727  | 0,009047546 | down | -1,8481054 | GPR63    | Homo sapiens G protein-coupled receptor 63 (GPR63), transcript variant 2, mRNA [NM_030784]                                               |
| A_23_P253692  | 0,027462259 | up   | 2,6838884  | GPR64    | Homo sapiens G protein-coupled receptor 64 (GPR64), transcript variant 1, mRNA [NM_001079858]                                            |
| A_33_P3222942 | 0,002005759 | down | -3,2473733 | GPR78    | Homo sapiens G protein-coupled receptor 78 (GPR78), transcript variant 1, mRNA [NM_080819]                                               |
| A_23_P36825   | 4,03E-04    | up   | 1,996425   | GPRC5A   | Homo sapiens G protein-coupled receptor, class C, group 5, member A (GPRC5A), mRNA [NM_003979]                                           |
| A_24_P160466  | 0,003367896 | up   | 1,7671115  | GPRIN1   | Homo sapiens G protein regulated inducer of neurite outgrowth 1 (GPRIN1), mRNA [NM_052899]                                               |
| A_32_P215938  | 0,011651007 | up   | 1,8216562  | GPSM1    | Homo sapiens G-protein signaling modulator 1 (GPSM1), transcript variant 1, mRNA [NM_001145638]                                          |
| A_23_P3038    | 0,025707763 | down | -1,6158806 | GPX2     | Homo sapiens glutathione peroxidase 2 (gastrintestinal) (GPX2), transcript variant 1, mRNA [NM_002083]                                   |
| A_23_P214544  | 0,007145948 | down | -2,376403  | GPX5     | Homo sapiens glutathione peroxidase 5 (GPX5), transcript variant 1, mRNA [NM_001509]                                                     |
| A_24_P876522  | 0,03760453  | down | -1,6779771 | GPX8     | Homo sapiens glutathione peroxidase 8 (putative) (GPX8), mRNA [NM_001008397]                                                             |
| A_21_P0011002 | 0,03726861  | up   | 2,078209   | GRAMD1B  | PREDICTED: Homo sapiens GRAM domain containing 1B (GRAMD1B), transcript variant X3, mRNA [XM_005271621]                                  |
| A_23_P22350   | 0,002180151 | up   | 2,2492068  | GRAMD3   | Homo sapiens GRAM domain containing 3 (GRAMD3), transcript variant 2, mRNA [NM_023927]                                                   |
| A_24_P23258   | 0,002392013 | up   | 1,5778039  | GRAMD4   | Homo sapiens GRAM domain containing 4 (GRAMD4), mRNA [NM_015124]                                                                         |
| A_24_P299355  | 0,047998834 | down | -1,6007717 | GRAPL    | Homo sapiens GRB2-related adaptor protein-like (GRAPL), mRNA [NM_001129778]                                                              |
| A_33_P3299416 | 0,004154743 | up   | 1,6788518  | GRASP    | Homo sapiens GRP1 (general receptor for phosphoinositides 1)-associated scaffold protein (GRASP), transcript variant 1, mRNA [NM_181711] |
| A_24_P407717  | 0,008658212 | up   | 1,5316979  | GRB2     | Homo sapiens growth factor receptor-bound protein 2 (GRB2), transcript variant 1, mRNA [NM_002086]                                       |
| A_23_P163992  | 0,014755414 | up   | 1,5689802  | GRB7     | Homo sapiens growth factor receptor-bound protein 7 (GRB7), transcript variant 1, mRNA [NM_005310]                                       |
| A_33_P3321642 | 0,001378008 | down | -2,161356  | GRHL2    | Homo sapiens grainyhead-like 2 (Drosophila) (GRHL2), mRNA [NM_024915]                                                                    |
| A_33_P3292660 | 2,40E-05    | down | -2,932343  | GRIA3    | Homo sapiens glutamate receptor, ionotropic, AMPA 3 (GRIA3), transcript variant 3, mRNA [NM_001256743]                                   |
| A_33_P3307147 | 0,013407583 | down | -1,8931065 | GRIK2    | Homo sapiens glutamate receptor, ionotropic, kainate 2 (GRIK2), transcript variant 3, mRNA [NM_001166247]                                |
| A_33_P3280074 | 0,0133658   | up   | 2,6377692  | GRIK4    | Homo sapiens glutamate receptor, ionotropic, kainate 4 (GRIK4), transcript variant 1, mRNA [NM_001282470]                                |
| A_23_P16063   | 0,028954387 | down | -1,8834364 | GRIK5    | Homo sapiens glutamate receptor, ionotropic, kainate 5 (GRIK5), transcript variant 2, mRNA [NM_002088]                                   |
| A_33_P3348127 | 0,023589134 | up   | 1,5021366  | GRIN1    | Homo sapiens glutamate receptor, ionotropic, N-methyl D-aspartate 1 (GRIN1), transcript variant GluN1-5b, mRNA [NM_001185091]            |
| A_33_P3334895 | 0,001110548 | down | -2,4044151 | GRIN2A   | Homo sapiens glutamate receptor, ionotropic, N-methyl D-aspartate 2A (GRIN2A), transcript variant 1, mRNA [NM_001134407]                 |
| A_23_P49546   | 0,002041802 | down | -2,0675054 | GRIN2C   | Homo sapiens glutamate receptor, ionotropic, N-methyl D-aspartate 2C (GRIN2C), transcript variant 1, mRNA [NM_000835]                    |
| A_23_P347541  | 4,49E-05    | down | -9,993847  | GRIN3A   | Homo sapiens glutamate receptor, ionotropic, N-methyl-D-aspartate 3A (GRIN3A), mRNA [NM_133445]                                          |
| A_33_P3279276 | 0,008239197 | down | -2,549413  | GRIP2    | Homo sapiens glutamate receptor interacting protein 2 (GRIP2), mRNA [NM_001080423]                                                       |
| A_33_P3240560 | 0,023142906 | up   | 2,0222685  | GRIP2    | Homo sapiens glutamate receptor interacting protein 2 (GRIP2), mRNA [NM_001080423]                                                       |
| A_33_P3240867 | 0,049338836 | down | -1,7402186 | GRK1     | Homo sapiens G protein-coupled receptor kinase 1 (GRK1), mRNA [NM_002929]                                                                |
| A_23_P313542  | 0,00270107  | down | -2,5159054 | GRK1     | Homo sapiens G protein-coupled receptor kinase 1 (GRK1), mRNA [NM_002929]                                                                |
| A_33_P3396578 | 0,032518364 | up   | 1,9688488  | GRK5     | Homo sapiens G protein-coupled receptor kinase 5, mRNA (cDNA clone IMAGE.3912936), with apparent retained intron. [BC018116]             |
| A_24_P83899   | 2,92E-05    | down | -3,4445233 | GRM5     | Homo sapiens glutamate receptor, metabotropic 5 (GRM5), transcript variant b, mRNA [NM_000842]                                           |
| A_21_P0012431 | 0,005928879 | up   | 1,8135818  | GRM7-AS3 | GRM7 antisense RNA 3 [Source:HGNC Symbol;Acc:HGNC:42444] [ENST00000445675]                                                               |

|                |                  |                         |                                                                                                                               |
|----------------|------------------|-------------------------|-------------------------------------------------------------------------------------------------------------------------------|
| A_33_P3241135  | 0,009890405 up   | 1,5681392 GRM8          | Homo sapiens glutamate receptor, metabotropic 8 (GRM8), transcript variant 1, mRNA [NM_000845]                                |
| A_23_P101131   | 7,65E-05 down    | -2,3068554 GRP          | Homo sapiens gastrin-releasing peptide (GRP), transcript variant 1, mRNA [NM_002091]                                          |
| A_21_P0014853  | 7,56E-06 down    | -2,3666143 GS1-24F4.2   | Homo sapiens uncharacterized LOC100652791 (GS1-24F4.2), long non-coding RNA [NR_045217]                                       |
| A_21_P0013399  | 0,007130324 down | -1,7207018 GS1-259H13.2 | Homo sapiens transmembrane protein 225-like (GS1-259H13.2), transcript variant 1, mRNA [NM_001195541]                         |
| A_23_P109382   | 0,021052513 down | -2,0178795 GSC2         | Homo sapiens gooseoid homeobox 2 (GSC2), mRNA [NM_005315]                                                                     |
| A_33_P3221999  | 0,034279637 up   | 1,6704557 GSDMB         | Homo sapiens gasdermin B (GSDMB), transcript variant 3, mRNA [NM_001165958]                                                   |
| A_33_P3224867  | 0,009566514 down | -2,0657132 GSG1         | Homo sapiens germ cell associated 1 (GSG1), transcript variant 5, mRNA [NM_001206842]                                         |
| A_33_P3226650  | 0,006539121 up   | 1,5069734 GSTA7P        | Homo sapiens glutathione S-transferase alpha 7, pseudogene (GSTA7P), non-coding RNA [NR_033760]                               |
| A_23_P58869    | 0,013358886 down | -1,9213274 GSTM2P1      | Homo sapiens glutathione S-transferase mu 2 (muscle) pseudogene 1 (GSTM2P1), non-coding RNA [NR_002932]                       |
| A_23_P97606    | 4,85E-04 down    | -2,9533257 GSTM5        | Homo sapiens glutathione S-transferase mu 5 (GSTM5), mRNA [NM_000851]                                                         |
| A_23_P106204   | 0,015576639 down | -1,5231328 GSTZ1        | Homo sapiens glutathione S-transferase zeta 1 (GSTZ1), transcript variant 1, mRNA [NM_145870]                                 |
| A_32_P470728   | 0,002160123 down | -1,7798007 GSX1         | Homo sapiens GS homeobox 1 (GSX1), mRNA [NM_145657]                                                                           |
| A_21_P0013240  | 0,018550523 up   | 1,5613441 GTF2IRD1      | Homo sapiens GTF2I repeat domain containing 1 (GTF2IRD1), transcript variant 3, mRNA [NM_001199207]                           |
| A_23_P111621   | 0,00506415 up    | 1,8155928 GTF2IRD1      | Homo sapiens GTF2I repeat domain containing 1 (GTF2IRD1), transcript variant 2, mRNA [NM_005685]                              |
| A_33_P3410454  | 0,012598364 up   | 1,5307513 GTF2IRD2B     | GTF2I repeat domain containing 2B [Source:HGNC Symbol;Acc:HGNC:33125] [ENST00000394939]                                       |
| A_33_P3299140  | 2,27E-05 down    | -5,3311434 GTF3C5       | general transcription factor IIIC, polypeptide 5, 63kDa [Source:HGNC Symbol;Acc:HGNC:4668] [ENST00000435745]                  |
| A_33_P3375646  | 0,00275325 up    | 2,2431738 GTPBP6        | Homo sapiens cDNA FLJ56662 complete cds, highly similar to Homo sapiens GTP binding protein 6 (GTPBP6), mRNA. [AK296003]      |
| A_21_P0011663  | 0,001609878 down | -7,8402534 GTSCR1       | Homo sapiens Gilles de la Tourette syndrome chromosome region, candidate 1 (non-protein coding) (GTSCR1), mRNA [NM_001278515] |
| A_33_P3372682  | 0,007449273 down | -1,5325682 GTSE1-AS1    | Homo sapiens GTSE1 antisense RNA 1 (head to head) (GTSE1-AS1), long non-coding RNA [NR_024009]                                |
| A_23_P81825    | 0,039147038 up   | 1,6118363 GUCA1B        | Homo sapiens guanylate cyclase activator 1B (retina) (GUCA1B), mRNA [NM_002098]                                               |
| A_33_P3269109  | 0,001351021 up   | 2,6242332 GUCY1A3       | guanylate cyclase 1, soluble, alpha 3 [Source:HGNC Symbol;Acc:HGNC:4685] [ENST00000512983]                                    |
| A_33_P3378354  | 0,005223789 down | -2,9228108 GUCY1B2      | guanylate cyclase 1, soluble, beta 2 (pseudogene) [Source:HGNC Symbol;Acc:HGNC:4686] [ENST00000389600]                        |
| A_23_P360302   | 0,001830586 up   | 1,6599213 GUCY2F        | Homo sapiens guanylate cyclase 2F, retinal (GUCY2F), mRNA [NM_001522]                                                         |
| A_23_P202034   | 0,004412488 down | -2,9978898 GUCY2GP      | Homo sapiens guanylate cyclase 2G, pseudogene (GUCY2GP), non-coding RNA [NR_028134]                                           |
| A_21_P0010955  | 0,004966741 down | -2,1678271 GUCY2GP      | Homo sapiens guanylate cyclase 2G, pseudogene (GUCY2GP), non-coding RNA [NR_028134]                                           |
| A_33_P3244369  | 0,002367541 down | -1,9065975 GXYL1P3      | Homo sapiens glucoside xylosyltransferase 1 pseudogene 3 (GXYL1P3), non-coding RNA [NR_121572]                                |
| A_23_P29422    | 0,002791555 down | -1,6761544 GYG1         | Homo sapiens glycoengin 1 (GYG1), transcript variant 1, mRNA [NM_004130]                                                      |
| A_21_P0013518  | 0,001322587 down | -1,6444604 GYG1         | Homo sapiens glycoengin 1 (GYG1), transcript variant 3, mRNA [NM_001184721]                                                   |
| A_33_P3362933  | 0,004218669 down | -2,2235413 GYP A        | Homo sapiens glycophorin A (MNS blood group) (GYP A), mRNA [NM_002099]                                                        |
| A_24_P139901   | 0,030936023 down | -1,9003744 GYPC         | Homo sapiens glycophorin C (Gerbich blood group) (GYPC), transcript variant 1, mRNA [NM_002101]                               |
| A_23_P41304    | 0,008740234 down | -2,0800996 GYPE         | Homo sapiens glycophorin E (MNS blood group) (GYPE), transcript variant 1, mRNA [NM_002102]                                   |
| A_24_P156288   | 0,004882542 up   | 1,6046172 GZF1          | Homo sapiens GDNF-inducible zinc finger protein 1 (GZF1), mRNA [NM_022482]                                                    |
| A_23_P130836   | 4,96E-04 down    | -2,4099512 GZMM         | Homo sapiens granzyme M (lymphocyte met-ase 1) (GZMM), transcript variant 1, mRNA [NM_005317]                                 |
| A_32_P202859   | 0,014048261 down | -1,740487 H1FNT         | Homo sapiens H1 histone family, member N, testis-specific (H1FNT), mRNA [NM_181788]                                           |
| A_33_P3222689  | 0,023441153 up   | 2,264142 H2BFM          | Homo sapiens H2B histone family, member M (H2BFM), mRNA [NM_001164416]                                                        |
| A_24_P626850   | 0,03205002 up    | 1,5978588 H6PD          | Homo sapiens hexose-6-phosphate dehydrogenase (glucose 1-dehydrogenase) (H6PD), transcript variant 2, mRNA [NM_004285]        |
| A_23_P28697    | 0,007936003 down | -2,297879 HAAO          | Homo sapiens 3-hydroxyanthranilate 3,4-dioxygenase (HAAO), mRNA [NM_012205]                                                   |
| A_33_P3209511  | 0,039172057 up   | 1,7965009 HAAO          | 3-hydroxyanthranilate 3,4-dioxygenase [Source:HGNC Symbol;Acc:HGNC:4796] [ENST00000402268]                                    |
| A_21_P0001940  | 0,014738527 up   | 2,3864875 HAGLROS       | Homo sapiens HAGLR opposite strand (non-protein coding) (HAGLROS), long non-coding RNA [NR_110457]                            |
| A_23_P61637    | 0,020553652 up   | 1,8487067 HAL           | Homo sapiens histidine ammonia-lyase (HAL), transcript variant 1, mRNA [NM_002108]                                            |
| A_33_P3336720  | 0,010704094 down | -2,052485 HAMP          | Homo sapiens hepcidin antimicrobial peptide (HAMP), mRNA [NM_021175]                                                          |
| A_23_P58770    | 0,009310278 down | -1,9913946 HAND1        | Homo sapiens heart and neural crest derivatives expressed 1 (HAND1), mRNA [NM_004821]                                         |
| A_23_P22129    | 0,034578875 down | -1,7861642 HAP1         | Homo sapiens huntingtin-associated protein 1 (HAP1), transcript variant 2, mRNA [NM_177977]                                   |
| A_33_P3318946  | 1,19E-07 down    | -5,0862484 HAPLN2       | Homo sapiens hyaluronan and proteoglycan link protein 2 (HAPLN2), mRNA [NM_021817]                                            |
| A_33_P3259393  | 0,032889005 up   | 1,668276 HAPLN3         | Homo sapiens hyaluronan and proteoglycan link protein 3 (HAPLN3), mRNA [NM_178232]                                            |
| A_32_P226498   | 0,00157735 down  | -1,7585773 HAR1A        | Homo sapiens highly accelerated region 1A (non-protein coding) (HAR1A), long non-coding RNA [NR_003244]                       |
| A_19_P00325498 | 0,003086957 up   | 1,5631231 HAR1A         | Homo sapiens highly accelerated region 1A (non-protein coding) (HAR1A), long non-coding RNA [NR_003244]                       |
| A_23_P349771   | 2,05E-05 up      | 2,9714763 HAUS5         | Homo sapiens HAUS augmin-like complex, subunit 5 (HAUS5), mRNA [NM_015302]                                                    |
| A_33_P3271945  | 2,08E-04 up      | 2,1224012 HAUS6         | HAUS augmin-like complex, subunit 6 [Source:HGNC Symbol;Acc:HGNC:25948] [ENST00000380496]                                     |
| A_24_P411561   | 0,015606083 up   | 1,9283028 HAVCR2        | Homo sapiens hepatitis A virus cellular receptor 2 (HAVCR2), mRNA [NM_032782]                                                 |
| A_23_P26457    | 8,85E-07 down    | -4,2518497 HBA2         | Homo sapiens hemoglobin, alpha 2 (HBA2), mRNA [NM_000517]                                                                     |
| A_33_P3258362  | 0,00554746 down  | -2,4367406 HBA2         | Homo sapiens hemoglobin, alpha 2 (HBA2), mRNA [NM_000517]                                                                     |
| A_24_P732099   | 0,001044986 down | -2,124324 HBBP1         | Homo sapiens hemoglobin, beta pseudogene 1 (HBBP1), non-coding RNA [NR_001589]                                                |
| A_24_P75190    | 0,004833977 down | -1,9641873 HBD          | Homo sapiens hemoglobin, delta (HBD), mRNA [NM_000519]                                                                        |
| A_24_P140608   | 0,03690173 up    | 1,7344575 HBEGF         | Homo sapiens heparin-binding EGF-like growth factor (HBEGF), mRNA [NM_001945]                                                 |
| A_33_P3329078  | 5,61E-04 down    | -1,8830012 HBG1         | Homo sapiens hemoglobin, gamma A (HBG1), mRNA [NM_000559]                                                                     |
| A_23_P49254    | 0,001044818 down | -1,956365 HBQ1          | Homo sapiens hemoglobin, theta 1 (HBQ1), mRNA [NM_005331]                                                                     |
| A_33_P3246293  | 0,020663312 down | -1,5968391 HBS1L        | Homo sapiens HBS1-like translational GTPase (HBS1L), transcript variant 3, mRNA [NM_001145207]                                |
| A_23_P429092   | 0,01645119 up    | 1,5286416 HBS1L         | Homo sapiens HBS1-like translational GTPase (HBS1L), transcript variant 3, mRNA [NM_001145207]                                |
| A_33_P3421827  | 0,005143235 down | -1,764401 HBZ           | Homo sapiens hemoglobin, zeta (HBZ), mRNA [NM_005332]                                                                         |
| A_21_P0011413  | 0,018512594 down | -2,0111082 HBZ          | Homo sapiens hemoglobin, zeta (HBZ), mRNA [NM_005332]                                                                         |

|                |             |      |            |           |                                                                                                                                         |
|----------------|-------------|------|------------|-----------|-----------------------------------------------------------------------------------------------------------------------------------------|
| A_33_P3380472  | 0,03402353  | down | -1,9062929 | HCAR1     | Homo sapiens hydroxycarboxylic acid receptor 1 (HCAR1), mRNA [NM_032554]                                                                |
| A_33_P3418511  | 6,39E-04    | down | -2,3196747 | HCCAT5    | Homo sapiens hepatocellular carcinoma associated transcript 5 (non-protein coding) (HCCAT5), long non-coding RNA [NR_027756]            |
| A_33_P3350207  | 0,005258909 | down | -1,6405324 | HCFC1R1   | Homo sapiens host cell factor C1 regulator 1 (XPO1 dependent) (HCFC1R1), transcript variant 1, mRNA [NM_017885]                         |
| A_33_P3281036  | 0,03585449  | down | -1,5077711 | HCG11     | Homo sapiens HLA complex group 11 (non-protein coding) (HCG11), long non-coding RNA [NR_026790]                                         |
| A_21_P0004638  | 0,010193622 | down | -1,8063086 | HCG14     | Homo sapiens HLA complex group 14 (non-protein coding) (HCG14), long non-coding RNA [NR_104117]                                         |
| A_33_P3242453  | 0,019196037 | up   | 4,08366    | HCG22     | Homo sapiens HLA complex group 22 (HCG22), long non-coding RNA [NR_003948]                                                              |
| A_23_P359376   | 1,18E-04    | down | -3,0499576 | HCG4B     | Homo sapiens HLA complex group 4B (non-protein coding) (HCG4B), long non-coding RNA [NR_001317]                                         |
| A_24_P255874   | 7,03E-04    | down | -2,3337145 | HCG4B     | Homo sapiens HLA complex group 4B (non-protein coding) (HCG4B), long non-coding RNA [NR_001317]                                         |
| A_33_P3279640  | 1,81E-04    | down | -5,0119853 | HCN2      | Homo sapiens hyperpolarization activated cyclic nucleotide gated potassium channel 2 (HCN2), mRNA [NM_001194]                           |
| A_24_P17870    | 0,001412229 | down | -2,2590015 | HCP5      | Homo sapiens HLA complex P5 (non-protein coding) (HCP5), long non-coding RNA [NR_040662]                                                |
| A_33_P3306624  | 0,028612057 | down | -1,9453716 | HCRT      | Homo sapiens hypocretin (orexin) neuropeptide precursor (HCRT), mRNA [NM_001524]                                                        |
| A_33_P3360249  | 0,03511759  | up   | 2,3344207  | HCRTR1    | Homo sapiens hypocretin (orexin) receptor 1 (HCRTR1), mRNA [NM_001525]                                                                  |
| A_23_P404162   | 0,021066705 | up   | 1,8764596  | HDAC9     | Homo sapiens histone deacetylase 9 (HDAC9), transcript variant 3, mRNA [NM_014707]                                                      |
| A_23_P117662   | 0,030056873 | down | -1,5614154 | HDC       | Homo sapiens histidine decarboxylase (HDC), mRNA [NM_002112]                                                                            |
| A_33_P3319640  | 0,04668592  | down | -1,5353616 | HDGFRP2   | Hepatoma-derived growth factor-related protein 2 [Source:UniProtKB/Swiss-Prot;Acc:Q7Z4V5] [ENST00000615225]                             |
| A_33_P3337831  | 0,013048367 | up   | 1,8463705  | HEATR1    | HEAT repeat containing 1 [Source:HGNC Symbol;Acc:HGNC:25517] [ENST00000366579]                                                          |
| A_33_P3251332  | 0,01359861  | up   | 1,546485   | HEATR5A   | Homo sapiens HEAT repeat containing 5A (HEATR5A), mRNA [NM_015473]                                                                      |
| A_32_P389118   | 0,003363523 | up   | 1,6498227  | HEATR5B   | Homo sapiens HEAT repeat containing 5B (HEATR5B), mRNA [NM_019024]                                                                      |
| A_23_P77965    | 0,004311132 | up   | 1,5872011  | HEATR6    | Homo sapiens HEAT repeat containing 6 (HEATR6), mRNA [NM_022070]                                                                        |
| A_23_P430792   | 0,006442114 | down | -2,2311523 | HEATR9    | Homo sapiens HEAT repeat containing 9 (HEATR9), mRNA [NM_152781]                                                                        |
| A_23_P54006    | 0,028086223 | up   | 1,541669   | HECTD1    | Homo sapiens HECT domain containing E3 ubiquitin protein ligase 1 (HECTD1), mRNA [NM_015382]                                            |
| A_33_P3221343  | 0,003550776 | down | -1,7615312 | HECTD2    | Homo sapiens HECT domain containing E3 ubiquitin protein ligase 2 (HECTD2), transcript variant 2, mRNA [NM_173497]                      |
| A_23_P149221   | 0,012305411 | up   | 1,5016406  | HECTD3    | Homo sapiens HECT domain containing E3 ubiquitin protein ligase 3 (HECTD3), mRNA [NM_024602]                                            |
| A_23_P162702   | 7,18E-06    | up   | 2,101758   | HECTD4    | Homo sapiens HECT domain containing E3 ubiquitin protein ligase 4 (HECTD4), mRNA [NM_001109662]                                         |
| A_33_P3258117  | 2,80E-04    | down | -2,1395042 | HELLS     | Homo sapiens helicase, lymphoid-specific (HELLS), transcript variant 7, mRNA [NM_001289072]                                             |
| A_33_P3290677  | 0,04067902  | up   | 1,9901832  | HELT      | Homo sapiens helt bHLH transcription factor (HELT), transcript variant 1, mRNA [NM_001300781]                                           |
| A_33_P3400374  | 0,001200643 | up   | 1,8917596  | HELZ2     | Homo sapiens helicase with zinc finger 2, transcriptional coactivator (HELZ2), transcript variant 1, mRNA [NM_001037335]                |
| A_24_P213950   | 0,00455544  | down | -2,582786  | HEPACAM   | Homo sapiens hepatic and glial cell adhesion molecule (HEPACAM), mRNA [NM_152722]                                                       |
| A_24_P399980   | 0,045907665 | down | -1,5664026 | HEPH      | Homo sapiens hephaestin (HEPH), transcript variant 2, mRNA [NM_014799]                                                                  |
| A_33_P3298120  | 0,008743118 | down | -2,1430945 | HEPN1     | Homo sapiens hepatocellular carcinoma, down-regulated 1 (HEPN1), mRNA [NM_001037558]                                                    |
| A_23_P257503   | 5,55E-04    | up   | 1,8905501  | HERC1     | Homo sapiens HECT and RLD domain containing E3 ubiquitin protein ligase family member 1 (HERC1), mRNA [NM_003922]                       |
| A_33_P3334343  | 0,016264822 | down | -1,6356195 | HERC2     | Homo sapiens HECT and RLD domain containing E3 ubiquitin protein ligase 2 (HERC2), mRNA [NM_004667]                                     |
| A_23_P250358   | 0,032947358 | up   | 2,206426   | HERC6     | Homo sapiens HECT and RLD domain containing E3 ubiquitin protein ligase family member 6 (HERC6), transcript variant 1, mRNA [NM_017912] |
| A_23_P6596     | 0,014158235 | up   | 1,5965549  | HES1      | Homo sapiens hes family bHLH transcription factor 1 (HES1), mRNA [NM_005524]                                                            |
| A_33_P3322864  | 3,43E-04    | down | -2,4609735 | HES6      | Homo sapiens hes family bHLH transcription factor 6 (HES6), transcript variant 1, mRNA [NM_018645]                                      |
| A_33_P3322859  | 0,004990507 | down | -1,7943754 | HES6      | Homo sapiens hes family bHLH transcription factor 6 (HES6), transcript variant 1, mRNA [NM_018645]                                      |
| A_24_P356601   | 0,004516445 | up   | 1,5153377  | HEXIM1    | Homo sapiens hexamethylene bis-acetamide inducible 1 (HEXIM1), mRNA [NM_006460]                                                         |
| A_32_P83845    | 0,019446112 | down | -2,099766  | HEY1      | Homo sapiens hes-related family bHLH transcription factor with YRPW motif 1 (HEY1), transcript variant 2, mRNA [NM_001040708]           |
| A_24_P289648   | 0,02001032  | down | -1,9472069 | HFE       | Homo sapiens hemochromatosis (HFE), transcript variant 11, mRNA [NM_139011]                                                             |
| A_32_P34046    | 0,004946376 | up   | 1,8117332  | HFM1      | Homo sapiens HFM1, ATP-dependent DNA helicase homolog (S. cerevisiae) (HFM1), mRNA [NM_001017975]                                       |
| A_33_P3328883  | 0,005486569 | up   | 1,8799044  | HGC6.3    | Homo sapiens uncharacterized LOC100128124 (HGC6.3), mRNA [NM_001129895]                                                                 |
| A_32_P115050   | 0,003764059 | down | -2,1888003 | HHIP-AS1  | Homo sapiens HHIP antisense RNA 1 (HHIP-AS1), long non-coding RNA [NR_037595]                                                           |
| A_23_P86064    | 0,002286235 | up   | 2,309257   | HHIPL2    | Homo sapiens HHIP-like 2 (HHIPL2), mRNA [NM_024746]                                                                                     |
| A_19_P00321196 | 0,009329415 | down | -1,991794  | HHLA1     | Homo sapiens HERV-H LTR-associating 1 (HHLA1), mRNA [NM_001145095]                                                                      |
| A_33_P3301040  | 0,003741551 | down | -3,1783168 | HHLA2     | Homo sapiens HERV-H LTR-associating 2 (HHLA2), transcript variant 4, mRNA [NM_001282558]                                                |
| A_23_P83073    | 0,001278458 | up   | 1,72005    | HIATL1    | Homo sapiens hippocampus abundant transcript-like 1 (HIATL1), mRNA [NM_032558]                                                          |
| A_33_P3379017  | 0,003426349 | up   | 1,5664546  | HIC2      | Homo sapiens hypermethylated in cancer 2 (HIC2), mRNA [NM_015094]                                                                       |
| A_23_P142187   | 0,019951386 | down | -1,6122245 | HIF3A     | Homo sapiens hypoxia inducible factor 3, alpha subunit (HIF3A), transcript variant 2, mRNA [NM_022462]                                  |
| A_33_P3338152  | 2,40E-05    | down | -3,5523608 | HIF3A     | hypoxia inducible factor 3, alpha subunit [Source:HGNC Symbol;Acc:HGNC:15825] [ENST00000475432]                                         |
| A_23_P338534   | 0,023420548 | up   | 1,9893645  | HIF3A     | Homo sapiens hypoxia inducible factor 3, alpha subunit (HIF3A), transcript variant 2, mRNA [NM_022462]                                  |
| A_24_P548866   | 0,034563087 | down | -1,7748989 | HIGD1A    | Homo sapiens HIG1 hypoxia inducible domain family, member 1A (HIGD1A), transcript variant 1, mRNA [NM_001099668]                        |
| A_23_P398294   | 6,48E-04    | up   | 1,635008   | HIP1R     | Homo sapiens huntingtin interacting protein 1 related (HIP1R), transcript variant 1, mRNA [NM_003959]                                   |
| A_24_P229164   | 0,010091365 | up   | 1,5303259  | HIP1R     | Homo sapiens huntingtin interacting protein 1 related (HIP1R), transcript variant 1, mRNA [NM_003959]                                   |
| A_24_P681011   | 1,09E-06    | up   | 2,618245   | HIPK2     | Homo sapiens homeodomain interacting protein kinase 2 (HIPK2), transcript variant 1, mRNA [NM_022740]                                   |
| A_23_P7976     | 0,005376293 | down | -1,8306426 | HIST1H1E  | Homo sapiens histone cluster 1, H1e (HIST1H1E), mRNA [NM_005321]                                                                        |
| A_23_P355439   | 0,009021338 | down | -1,8383144 | HIST1H2AA | Homo sapiens histone cluster 1, H2aa (HIST1H2AA), mRNA [NM_170745]                                                                      |
| A_23_P372860   | 5,88E-05    | down | -2,105557  | HIST1H2AC | Homo sapiens histone cluster 1, H2ac (HIST1H2AC), mRNA [NM_003512]                                                                      |
| A_21_P0000197  | 1,06E-06    | down | -3,0707626 | HIST1H2AG | Homo sapiens histone cluster 1, H2ag (HIST1H2AG), mRNA [NM_021064]                                                                      |
| A_23_P81859    | 0,017578103 | down | -1,949021  | HIST1H2AH | Homo sapiens histone cluster 1, H2ah (HIST1H2AH), mRNA [NM_080596]                                                                      |
| A_33_P3360216  | 0,001496088 | down | -3,2797215 | HIST1H2AI | Homo sapiens histone cluster 1, H2ai (HIST1H2AI), mRNA [NM_003509]                                                                      |
| A_23_P323823   | 0,021067059 | up   | 2,4526615  | HIST1H2BA | Homo sapiens histone cluster 1, H2ba (HIST1H2BA), mRNA [NM_170610]                                                                      |

|                |                  |            |           |                                                                                                                                                                  |
|----------------|------------------|------------|-----------|------------------------------------------------------------------------------------------------------------------------------------------------------------------|
| A_33_P3229122  | 1,82E-04 down    | -2,492722  | HIST1H2BF | Homo sapiens histone cluster 1, H2bf (HIST1H2BF), mRNA [NM_003522]                                                                                               |
| A_33_P3229067  | 0,001685746 down | -1,8567146 | HIST1H2BN | Homo sapiens histone cluster 1, H2bn (HIST1H2BN), mRNA [NM_003520]                                                                                               |
| A_23_P59069    | 0,038922857 down | -1,5408846 | HIST1H2BO | Homo sapiens histone cluster 1, H2bo (HIST1H2BO), mRNA [NM_003527]                                                                                               |
| A_23_P93258    | 2,22E-04 down    | -2,0724356 | HIST1H3B  | Homo sapiens histone cluster 1, H3b (HIST1H3B), mRNA [NM_003537]                                                                                                 |
| A_24_P217834   | 3,23E-04 down    | -1,8191965 | HIST1H3D  | Homo sapiens histone cluster 1, H3d (HIST1H3D), mRNA [NM_003530]                                                                                                 |
| A_23_P30799    | 0,00404298 down  | -1,5358788 | HIST1H3F  | Homo sapiens histone cluster 1, H3f (HIST1H3F), mRNA [NM_021018]                                                                                                 |
| A_24_P9321     | 1,22E-04 down    | -1,989284  | HIST1H3I  | Homo sapiens histone cluster 1, H3i (HIST1H3I), mRNA [NM_003533]                                                                                                 |
| A_23_P93282    | 0,020880792 down | -1,829476  | HIST1H3J  | Homo sapiens histone cluster 1, H3j (HIST1H3J), mRNA [NM_003535]                                                                                                 |
| A_33_P3344229  | 6,77E-07 down    | -2,9686506 | HIST1H4A  | Homo sapiens histone cluster 1, H4a (HIST1H4A), mRNA [NM_003538]                                                                                                 |
| A_24_P166407   | 0,015382585 down | -1,5926392 | HIST1H4B  | Homo sapiens histone cluster 1, H4b (HIST1H4B), mRNA [NM_003544]                                                                                                 |
| A_33_P3378880  | 0,00558101 down  | -1,8124152 | HIST1H4C  | histone cluster 1, H4c [Source:HGNC Symbol;Acc:HGNC:4787] [ENST00000377803]                                                                                      |
| A_33_P3410836  | 4,16E-05 down    | -2,1101665 | HIST1H4D  | Homo sapiens histone cluster 1, H4d (HIST1H4D), mRNA [NM_003539]                                                                                                 |
| A_23_P395374   | 0,002317277 down | -1,6843828 | HIST1H4D  | Homo sapiens histone cluster 1, H4d (HIST1H4D), mRNA [NM_003539]                                                                                                 |
| A_23_P415411   | 4,82E-05 down    | -2,0333576 | HIST1H4E  | Homo sapiens histone cluster 1, H4e (HIST1H4E), mRNA [NM_003545]                                                                                                 |
| A_23_P323685   | 0,003074857 down | -1,9407462 | HIST1H4H  | Homo sapiens histone cluster 1, H4h (HIST1H4H), mRNA [NM_003543]                                                                                                 |
| A_24_P20873    | 5,58E-04 down    | -1,92553   | HIST1H4I  | Homo sapiens histone cluster 1, H4i (HIST1H4I), mRNA [NM_003495]                                                                                                 |
| A_33_P3299865  | 1,55E-04 down    | -1,9213991 | HIST1H4K  | Homo sapiens histone cluster 1, H4k (HIST1H4K), mRNA [NM_003541]                                                                                                 |
| A_33_P3351851  | 0,001617059 down | -1,798097  | HIST1H4L  | Homo sapiens histone cluster 1, H4l (HIST1H4L), mRNA [NM_003546]                                                                                                 |
| A_24_P68631    | 6,35E-05 down    | -3,0025165 | HIST2H2AB | Homo sapiens histone cluster 2, H2ab (HIST2H2AB), mRNA [NM_175065]                                                                                               |
| A_23_P301247   | 1,54E-05 down    | -2,2656443 | HIST2H2AC | Homo sapiens histone cluster 2, H2ac (HIST2H2AC), mRNA [NM_003517]                                                                                               |
| A_33_P3584591  | 0,003896507 up   | 1,6012734  | HIST2H2BA | AGENCOURT_8230913 Lupski_dorsal_root_ganglion Homo sapiens cDNA clone IMAGE:6182568 5', mRNA sequence [BQ880825]                                                 |
| A_23_P436281   | 0,003828814 down | -1,5297269 | HIST2H4B  | Homo sapiens histone cluster 2, H4b (HIST2H4B), mRNA [NM_001034077]                                                                                              |
| A_33_P3229335  | 0,029833786 down | -2,263397  | HIST3H2BB | Homo sapiens histone cluster 3, H2bb (HIST3H2BB), mRNA [NM_175055]                                                                                               |
| A_23_P388871   | 0,010389054 down | -2,3241265 | HIST4H4   | Homo sapiens histone cluster 4, H4 (HIST4H4), mRNA [NM_175054]                                                                                                   |
| A_23_P214766   | 0,001141353 up   | 1,8541164  | HIVEP2    | Homo sapiens human immunodeficiency virus type 1 enhancer binding protein 2 (HIVEP2), mRNA [NM_006734]                                                           |
| A_33_P3335233  | 4,16E-04 down    | -1,8245721 | HKDC1     | Homo sapiens hexokinase domain containing 1 (HKDC1), mRNA [NM_025130]                                                                                            |
| A_23_P429020   | 0,001320261 up   | 1,8938237  | HKR1      | Homo sapiens HKR1, GLI-Kruppel zinc finger family member (HKR1), mRNA [NM_181786]                                                                                |
| A_33_P3237574  | 7,14E-05 down    | -4,014172  | HLA-A     | Homo sapiens major histocompatibility complex, class I, A (HLA-A), transcript variant 2 (A*01:01:01:01 allele), mRNA [NM_001242758]                              |
| A_23_P42306    | 0,004525662 down | -1,61178   | HLA-DMA   | Homo sapiens major histocompatibility complex, class II, DM alpha (HLA-DMA), mRNA [NM_006120]                                                                    |
| A_32_P356316   | 0,00209728 down  | -2,0558805 | HLA-DOA   | Homo sapiens major histocompatibility complex, class II, DO alpha (HLA-DOA), mRNA [NM_002119]                                                                    |
| A_33_P3234277  | 0,007440937 down | -1,6656693 | HLA-DPA1  | Homo sapiens major histocompatibility complex, class II, DP alpha 1 (HLA-DPA1), transcript variant 2, mRNA [NM_001242524]                                        |
| A_33_P3271634  | 0,004205641 down | -1,8915035 | HLA-DPB1  | major histocompatibility complex, class II, DP beta 1 [Source:HGNC Symbol;Acc:HGNC:4940] [ENST00000466949]                                                       |
| A_24_P166443   | 0,031168299 down | -1,6067256 | HLA-DPB1  | Homo sapiens major histocompatibility complex, class II, DP beta 1 (HLA-DPB1), mRNA [NM_002121]                                                                  |
| A_33_P3271651  | 0,004004741 down | -2,2556922 | HLA-DPB1  | Homo sapiens major histocompatibility complex, class II, DP beta 1 (HLA-DPB1), mRNA [NM_002121]                                                                  |
| A_32_P505730   | 0,019204423 down | -1,7966197 | HLA-DPB2  | major histocompatibility complex, class II, DP beta 2 (pseudogene) [Source:HGNC Symbol;Acc:HGNC:4941] [ENST00000304890]                                          |
| A_33_P3273884  | 0,041243464 down | -1,814365  | HLA-DQA1  | Homo sapiens major histocompatibility complex, class II, DQ alpha 1 (HLA-DQA1), mRNA [NM_002122]                                                                 |
| A_33_P3293049  | 0,048472874 up   | 1,8870652  | HLA-DQA1  | Homo sapiens major histocompatibility complex, class II, DQ alpha 1 (HLA-DQA1), mRNA [NM_002122]                                                                 |
| A_32_P87697    | 0,01924299 up    | 2,5127823  | HLA-DRA   | Homo sapiens major histocompatibility complex, class II, DR alpha (HLA-DRA), mRNA [NM_019111]                                                                    |
| A_19_P00317913 | 0,001436618 down | -1,9975991 | HLA-F-AS1 | Homo sapiens HLA-F antisense RNA 1 (HLA-F-AS1), transcript variant 2, long non-coding RNA [NR_026973]                                                            |
| A_32_P76811    | 0,025307573 down | -1,6350058 | HLA-F-AS1 | Homo sapiens HLA-F antisense RNA 1 (HLA-F-AS1), transcript variant 1, long non-coding RNA [NR_026972]                                                            |
| A_23_P134684   | 0,027169727 up   | 1,5220101  | HMBX1     | Homo sapiens homeobox containing 1 (HMBX1), transcript variant 1, mRNA [NM_024567]                                                                               |
| A_21_P0013605  | 0,035852224 down | -1,5103077 | HMCN2     | Homo sapiens hemicentin 2 (HMCN2), mRNA [NM_001291815]                                                                                                           |
| A_33_P3224730  | 0,009908535 down | -1,5565445 | HMCN2     | Homo sapiens hemicentin 2 (HMCN2), mRNA [NM_001291815]                                                                                                           |
| A_33_P3421530  | 0,001042806 up   | 2,0377245  | HMCN2     | Homo sapiens cDNA FLJ46139 fis, clone TEST12052670, weakly similar to Basement membrane-specific heparan sulfate proteoglycan core protein precursor. [AK128020] |
| A_24_P75127    | 0,004806795 up   | 1,6700169  | HMCN2     | Homo sapiens hemicentin 2 (HMCN2), mRNA [NM_001291815]                                                                                                           |
| A_21_P0000710  | 0,002478603 down | -1,8883015 | HMGAI1P7  | Homo sapiens high mobility group AT-hook 1 pseudogene 7 (HMGAI1P7), non-coding RNA [NR_037938]                                                                   |
| A_33_P3211078  | 0,028041389 down | -1,6358004 | HMGGA2    | Homo sapiens high mobility group AT-hook 2 (HMGGA2), transcript variant 3, mRNA [NM_001300918]                                                                   |
| A_33_P3237359  | 0,01537244 up    | 1,559645   | HMGGB3    | Homo sapiens high mobility group box 3 (HMGGB3), transcript variant 1, mRNA [NM_001301228]                                                                       |
| A_33_P3319041  | 0,010771482 up   | 1,7462195  | HMGGB3    | Homo sapiens high mobility group box 3 (HMGGB3), transcript variant 1, mRNA [NM_001301228]                                                                       |
| A_33_P3388283  | 0,007038314 down | -1,663555  | HMGCL     | 3-hydroxymethyl-3-methylglutaryl-CoA lyase [Source:HGNC Symbol;Acc:HGNC:5005] [ENST00000496907]                                                                  |
| A_32_P49508    | 0,010349119 down | -2,4455123 | HMGCLL1   | Homo sapiens 3-hydroxymethyl-3-methylglutaryl-CoA lyase-like 1 (HMGCLL1), transcript variant 1, mRNA [NM_019036]                                                 |
| A_33_P3214012  | 0,018191556 down | -2,0473406 | HMGCLL1   | Homo sapiens 3-hydroxymethyl-3-methylglutaryl-CoA lyase-like 1 (HMGCLL1), transcript variant 4, mRNA [NM_001287746]                                              |
| A_21_P0014727  | 0,015775474 up   | 1,8452727  | HMGN3-AS1 | Homo sapiens HMGN3 antisense RNA 1 (HMGN3-AS1), long non-coding RNA [NR_040671]                                                                                  |
| A_23_P431981   | 7,33E-04 up      | 1,5532157  | HMGXB4    | Homo sapiens HMG box domain containing 4 (HMGXB4), transcript variant 1, mRNA [NM_001003681]                                                                     |
| A_33_P3318414  | 0,021162491 up   | 1,528641   | HMHA1     | Homo sapiens histocompatibility (minor) HA-1 (HMHA1), transcript variant 1, mRNA [NM_012292]                                                                     |
| A_23_P30204    | 9,84E-04 down    | -2,650677  | HMHB1     | Homo sapiens histocompatibility (minor) HB-1 (HMHB1), mRNA [NM_021182]                                                                                           |
| A_23_P319005   | 0,001155234 down | -2,1018016 | HMP19     | Homo sapiens HMP19 protein (HMP19), mRNA [NM_015980]                                                                                                             |
| A_33_P3279009  | 0,03273818 down  | -1,5753238 | HMX1      | Homo sapiens H6 family homeobox 1 (HMX1), mRNA [NM_018942]                                                                                                       |
| A_33_P3335940  | 4,05E-05 down    | -2,3070016 | HN1L      | Homo sapiens hematological and neurological expressed 1-like (HN1L), mRNA [NM_144570]                                                                            |
| A_24_P314515   | 9,94E-05 down    | -3,1421816 | HNF1A-AS1 | Homo sapiens HNF1A antisense RNA 1 (HNF1A-AS1), long non-coding RNA [NR_024345]                                                                                  |
| A_24_P330822   | 3,02E-04 down    | -3,4937778 | HNF1B     | HNF1 homeobox B [Source:HGNC Symbol;Acc:HGNC:11630] [ENST00000621123]                                                                                            |

|                |                  |                      |                                                                                                                                            |
|----------------|------------------|----------------------|--------------------------------------------------------------------------------------------------------------------------------------------|
| A_23_P28761    | 0,03739146 up    | 2,0764575 HNF4A      | Homo sapiens hepatocyte nuclear factor 4, alpha (HNF4A), transcript variant 6, mRNA [NM_001030004]                                         |
| A_23_P251453   | 0,006440555 up   | 1,6304468 HNF4G      | Homo sapiens hepatocyte nuclear factor 4, gamma (HNF4G), mRNA [NM_004133]                                                                  |
| A_24_P517901   | 0,009569193 down | -2,0638452 HNRNPA1   | Homo sapiens heterogeneous nuclear ribonucleoprotein A1 (HNRNPA1), transcript variant 1, mRNA [NM_002136]                                  |
| A_32_P8015     | 0,001842846 up   | 1,5374743 HNRNPA1L2  | Homo sapiens heterogeneous nuclear ribonucleoprotein A1-like 2 (HNRNPA1L2), transcript variant 1, mRNA [NM_001011724]                      |
| A_24_P269895   | 5,79E-04 down    | -1,7847922 HNRNPA3   | Homo sapiens heterogeneous nuclear ribonucleoprotein A3 (HNRNPA3), mRNA [NM_194247]                                                        |
| A_33_P3422170  | 9,78E-06 down    | -3,2656121 HNRNPA3   | Homo sapiens heterogeneous nuclear ribonucleoprotein A3 (HNRNPA3), mRNA [NM_194247]                                                        |
| A_24_P706314   | 0,008936658 up   | 1,5978988 HNRNPA3    | Homo sapiens heterogeneous nuclear ribonucleoprotein A3 (HNRNPA3), mRNA [NM_194247]                                                        |
| A_22_P136161   | 2,97E-04 down    | -3,1033063 HNRNPCL1  | Homo sapiens heterogeneous nuclear ribonucleoprotein C-like 1 (HNRNPCL1), mRNA [NM_001013631]                                              |
| A_23_P11286    | 0,009180428 up   | 1,5284913 HNRNPH2    | Homo sapiens heterogeneous nuclear ribonucleoprotein H2 (H') (HNRNPH2), transcript variant 1, mRNA [NM_019597]                             |
| A_33_P3380161  | 0,008996571 up   | 1,7229505 HNRNPU-AS1 | Homo sapiens HNRNPU antisense RNA 1 (HNRNPU-AS1), long non-coding RNA [NR_026778]                                                          |
| A_23_P99906    | 5,02E-04 down    | -1,6013273 HOMER2    | Homo sapiens homer homolog 2 (Drosophila) (HOMER2), transcript variant 2, mRNA [NM_199330]                                                 |
| A_33_P3350673  | 0,023553602 down | -3,9377358 HOPX      | Homo sapiens HOP homeobox (HOPX), transcript variant 5, mRNA [NM_001145460]                                                                |
| A_19_P00330464 | 0,009405563 down | -2,0319715 HOTAIR    | Homo sapiens HOX transcript antisense RNA (HOTAIR), transcript variant 3, long non-coding RNA [NR_047518]                                  |
| A_19_P00329806 | 0,007263965 down | -3,069209 HOTAIR     | Homo sapiens HOX transcript antisense RNA (HOTAIR), transcript variant 3, long non-coding RNA [NR_047518]                                  |
| A_21_P0010502  | 0,013289575 up   | 2,5695338 HOTAIR     | Homo sapiens HOX transcript antisense RNA (HOTAIR), transcript variant 3, long non-coding RNA [NR_047518]                                  |
| A_19_P00330814 | 0,019982494 up   | 1,8002514 HOTAIR     | Homo sapiens HOX transcript antisense RNA (HOTAIR), transcript variant 3, long non-coding RNA [NR_047518]                                  |
| A_21_P0000690  | 0,005479139 down | -1,7699054 HOTTIP    | Homo sapiens HOXA distal transcript antisense RNA (HOTTIP), long non-coding RNA [NR_037843]                                                |
| A_23_P303978   | 0,007206545 up   | 3,384505 HOXA-AS2    | PREDICTED: Homo sapiens HOXA cluster antisense RNA 2 (HOXA-AS2), transcript variant X3, misc_RNA [XR_426154]                               |
| A_33_P3288649  | 2,56E-06 down    | -3,6138618 HOXA10    | Homo sapiens homeobox A10 (HOXA10), transcript variant 1, mRNA [NM_018951]                                                                 |
| A_23_P93772    | 0,008921609 down | -1,6315465 HOXA5     | Homo sapiens homeobox A5 (HOXA5), mRNA [NM_019102]                                                                                         |
| A_33_P3416231  | 0,0287716 down   | -1,5529215 HOXA9     | Homo sapiens homeobox A9 (HOXA9), mRNA [NM_152739]                                                                                         |
| A_21_P0000588  | 1,47E-04 down    | -2,2999432 HOXB-AS3  | Homo sapiens HOXB cluster antisense RNA 3 (HOXB-AS3), transcript variant 8, long non-coding RNA [NR_110331]                                |
| A_33_P3256760  | 0,010889646 up   | 2,1349678 HOXB-AS3   | Homo sapiens HOXB cluster antisense RNA 3 (HOXB-AS3), transcript variant 1, long non-coding RNA [NR_033201]                                |
| A_23_P55281    | 0,010001525 up   | 2,893467 HOXB7       | Homo sapiens homeobox B7 (HOXB7), mRNA [NM_004502]                                                                                         |
| A_23_P335981   | 0,013365089 up   | 2,8749177 HOXC12     | Homo sapiens homeobox C12 (HOXC12), mRNA [NM_173860]                                                                                       |
| A_33_P3300965  | 0,03152497 down  | -2,2361546 HOXC6     | Homo sapiens homeobox C6 (HOXC6), transcript variant 1, mRNA [NM_004503]                                                                   |
| A_21_P0000804  | 0,012406716 up   | 2,0707414 HOXD-AS2   | Homo sapiens HOXD cluster antisense RNA 2 (HOXD-AS2), long non-coding RNA [NR_038435]                                                      |
| A_23_P429383   | 1,74E-05 down    | -3,625333 HOXD9      | Homo sapiens homeobox D9 (HOXD9), mRNA [NM_014213]                                                                                         |
| A_33_P3333238  | 0,002704259 up   | 3,0535908 HOXD9      | Homo sapiens homeobox D9 (HOXD9), mRNA [NM_014213]                                                                                         |
| A_23_P206760   | 0,009594685 down | -1,5299377 HP        | Homo sapiens haptoglobin (HP), transcript variant 1, mRNA [NM_005143]                                                                      |
| A_33_P3246133  | 0,006856144 up   | 1,5597274 HPCA       | Homo sapiens hippocalcin (HPCA), mRNA [NM_002143]                                                                                          |
| A_33_P3244568  | 8,42E-04 down    | -2,7627234 HPN-AS1   | Homo sapiens HPN antisense RNA 1 (HPN-AS1), transcript variant 1, long non-coding RNA [NR_024561]                                          |
| A_23_P109442   | 0,002167652 up   | 1,6348284 HPS4       | Homo sapiens Hermansky-Pudlak syndrome 4 (HPS4), transcript variant 1, mRNA [NM_022081]                                                    |
| A_24_P103893   | 0,019114943 up   | 1,57316 HPSE2        | Homo sapiens heparanase 2 (inactive) (HPSE2), transcript variant 1, mRNA [NM_021828]                                                       |
| A_33_P3390955  | 0,002757762 down | -3,8761911 HPVC1     | Homo sapiens human papillomavirus (type 18) E5 central sequence-like 1 (HPVC1), long non-coding RNA [NR_004422]                            |
| A_33_P3324206  | 0,025605764 up   | 2,5948868 HR         | Homo sapiens hair growth associated (HR), transcript variant 1, mRNA [NM_005144]                                                           |
| A_23_P105012   | 0,037146356 up   | 2,8592906 HRASLS2    | Homo sapiens HRAS-like suppressor 2 (HRASLS2), mRNA [NM_017878]                                                                            |
| A_23_P53018    | 1,78E-04 down    | -2,2246108 HRASLS5   | Homo sapiens HRAS-like suppressor family, member 5 (HRASLS5), transcript variant 1, mRNA [NM_054108]                                       |
| A_23_P416314   | 0,009686125 down | -2,8701372 HRASLS5   | Homo sapiens HRAS-like suppressor family, member 5 (HRASLS5), transcript variant 1, mRNA [NM_054108]                                       |
| A_23_P386310   | 0,005372807 up   | 1,617661 HRH4        | Homo sapiens histamine receptor H4 (HRH4), transcript variant 1, mRNA [NM_021624]                                                          |
| A_24_P8220     | 2,57E-04 up      | 1,7303046 HS6ST1     | Homo sapiens heparan sulfate 6-O-sulfotransferase 1 (HS6ST1), mRNA [NM_004807]                                                             |
| A_33_P3269328  | 0,03421331 up    | 1,783919 HS6ST2-AS1  | Homo sapiens HS6ST2 antisense RNA 1 (HS6ST2-AS1), long non-coding RNA [NR_046691]                                                          |
| A_23_P32629    | 0,049749732 up   | 2,1596513 HS6ST3     | Homo sapiens heparan sulfate 6-O-sulfotransferase 3 (HS6ST3), mRNA [NM_153456]                                                             |
| A_33_P3309231  | 2,52E-04 down    | -1,789975 HSCB       | Homo sapiens HscB mitochondrial iron-sulfur cluster co-chaperone (HSCB), mRNA [NM_172002]                                                  |
| A_23_P14986    | 0,003507377 up   | 2,675781 HSD11B2     | Homo sapiens hydroxysteroid (11-beta) dehydrogenase 2 (HSD11B2), mRNA [NM_000196]                                                          |
| A_33_P3335042  | 0,002377223 down | -1,5743148 HSD17B12  | Homo sapiens hydroxysteroid (17-beta) dehydrogenase 12 (HSD17B12), mRNA [NM_016142]                                                        |
| A_23_P78762    | 0,035159968 down | -1,6458961 HSD17B14  | Homo sapiens hydroxysteroid (17-beta) dehydrogenase 14 (HSD17B14), mRNA [NM_016246]                                                        |
| A_23_P81973    | 0,006237744 down | -1,649735 HSD17B8    | Homo sapiens hydroxysteroid (17-beta) dehydrogenase 8 (HSD17B8), mRNA [NM_014234]                                                          |
| A_24_P350397   | 0,005073893 up   | 2,3265784 HSD3B1     | Homo sapiens hydroxy-delta-5-steroid dehydrogenase, 3 beta- and steroid delta-isomerase 1 (HSD3B1), mRNA [NM_000862]                       |
| A_23_P51580    | 0,03669871 down  | -1,9014846 HSD3B2    | Homo sapiens hydroxy-delta-5-steroid dehydrogenase, 3 beta- and steroid delta-isomerase 2 (HSD3B2), transcript variant 1, mRNA [NM_000198] |
| A_23_P206324   | 0,004155602 up   | 1,5423712 HSDL1      | Homo sapiens hydroxysteroid dehydrogenase like 1 (HSDL1), transcript variant 1, mRNA [NM_031463]                                           |
| A_23_P143512   | 0,04611166 down  | -1,7398057 HSF2BP    | Homo sapiens heat shock transcription factor 2 binding protein (HSF2BP), mRNA [NM_007031]                                                  |
| A_23_P96497    | 0,04778582 down  | -1,838555 HSFX1      | Homo sapiens heat shock transcription factor family, X linked 1 (HSFX1), mRNA [NM_016153]                                                  |
| A_33_P3262660  | 0,012649986 up   | 1,8607665 HSFY1P1    | Homo sapiens heat shock transcription factor, Y-linked 1 pseudogene 1 (HSFY1P1), non-coding RNA [NR_003607]                                |
| A_21_P0012242  | 0,014924848 up   | 1,6260266 HSFY1P1    | Homo sapiens heat shock transcription factor, Y-linked 1 pseudogene 1 (HSFY1P1), non-coding RNA [NR_003607]                                |
| A_23_P45579    | 0,009164658 up   | 1,6165117 HSFY2      | Homo sapiens heat shock transcription factor, Y linked 2 (HSFY2), transcript variant 1, mRNA [NM_153716]                                   |
| A_23_P153372   | 0,031574614 up   | 1,5518726 HSH2D      | Homo sapiens hematopoietic SH2 domain containing (HSH2D), transcript variant 1, mRNA [NM_032855]                                           |
| A_33_P3408212  | 0,04187005 down  | -1,8331393 HSP90B1   | Homo sapiens heat shock protein 90kDa beta (Grp94), member 1 (HSP90B1), mRNA [NM_003299]                                                   |
| A_23_P70547    | 0,027085125 up   | 1,5092076 HSPA1L     | Homo sapiens heat shock 70kDa protein 1-like (HSPA1L), mRNA [NM_005527]                                                                    |
| A_24_P308029   | 0,005017571 down | -3,0115173 HSPB6     | Homo sapiens heat shock protein, alpha-crystallin-related, B6 (HSPB6), mRNA [NM_144617]                                                    |
| A_24_P307580   | 0,035332657 up   | 1,7057303 HTATIP2    | Homo sapiens HIV-1 Tat interactive protein 2, 30kDa (HTATIP2), transcript variant 5, mRNA [NM_001098523]                                   |

|               |             |      |            |             |                                                                                                                                        |
|---------------|-------------|------|------------|-------------|----------------------------------------------------------------------------------------------------------------------------------------|
| A_33_P3212665 | 7,37E-04    | down | -2,0434484 | HTATSF1P2   | Homo sapiens HIV-1 Tat specific factor 1 pseudogene 2 (HTATSF1P2), non-coding RNA [NR_033884]                                          |
| A_24_P97687   | 0,01675707  | down | -2,0159528 | HTR1A       | Homo sapiens 5-hydroxytryptamine (serotonin) receptor 1A, G protein-coupled (HTR1A), mRNA [NM_000524]                                  |
| A_23_P156824  | 0,028811073 | down | -2,3053637 | HTR1B       | Homo sapiens 5-hydroxytryptamine (serotonin) receptor 1B, G protein-coupled (HTR1B), mRNA [NM_000863]                                  |
| A_33_P3319176 | 0,002895417 | up   | 1,5695919  | HTR2C       | 5-hydroxytryptamine (serotonin) receptor 2C, G protein-coupled [Source:HGNC Symbol;Acc:HGNC:5295] [ENST00000371951]                    |
| A_24_P150068  | 2,32E-04    | down | -2,7729204 | HTR3A       | Homo sapiens 5-hydroxytryptamine (serotonin) receptor 3A, ionotropic (HTR3A), transcript variant 1, mRNA [NM_213621]                   |
| A_23_P87007   | 0,02688598  | up   | 1,809479   | HTR3B       | Homo sapiens 5-hydroxytryptamine (serotonin) receptor 3B, ionotropic (HTR3B), mRNA [NM_006028]                                         |
| A_24_P32139   | 0,004944449 | down | -2,0978289 | HTR3E       | Homo sapiens 5-hydroxytryptamine (serotonin) receptor 3E, ionotropic (HTR3E), transcript variant 1, mRNA [NM_182589]                   |
| A_23_P133637  | 0,002001995 | down | -3,1842644 | HTR4        | Homo sapiens 5-hydroxytryptamine (serotonin) receptor 4, G protein-coupled (HTR4), transcript variant d, mRNA [NM_001040172]           |
| A_33_P3345016 | 0,01483987  | down | -2,499635  | HTR6        | Homo sapiens 5-hydroxytryptamine (serotonin) receptor 6, G protein-coupled (HTR6), mRNA [NM_000871]                                    |
| A_24_P160070  | 0,006929396 | up   | 1,7487901  | HUNK        | Homo sapiens hormonally up-regulated Neu-associated kinase (HUNK), mRNA [NM_014586]                                                    |
| A_33_P3811287 | 2,54E-04    | up   | 1,665934   | HUWE1       | Homo sapiens HECT, UBA and WWE domain containing 1, E3 ubiquitin protein ligase (HUWE1), mRNA [NM_031407]                              |
| A_33_P3276856 | 0,002949173 | down | -2,9663448 | HYDIN       | Homo sapiens HYDIN, axonemal central pair apparatus protein (HYDIN), transcript variant 3, mRNA [NM_001198542]                         |
| A_33_P3402983 | 0,009250621 | up   | 1,6178532  | HYDIN       | Homo sapiens HYDIN, axonemal central pair apparatus protein (HYDIN), transcript variant 1, mRNA [NM_001270974]                         |
| A_33_P3257538 | 0,002038517 | down | -1,8686112 | HYKK        | Homo sapiens hydroxyllysine kinase (HYKK), transcript variant 2, mRNA [NM_001083612]                                                   |
| A_33_P3308481 | 0,004046568 | up   | 2,1251822  | HYMAI       | Homo sapiens hydattidiform mole associated and imprinted (non-protein coding) (HYMAI), long non-coding RNA [NR_002768]                 |
| A_23_P139648  | 4,48E-05    | down | -2,112569  | IAPP        | Homo sapiens islet amyloid polypeptide (IAPP), mRNA [NM_000415]                                                                        |
| A_33_P3209346 | 0,021434665 | down | -1,7575938 | IARS        | Homo sapiens isoleucyl-tRNA synthetase (IARS), transcript variant 2, mRNA [NM_013417]                                                  |
| A_24_P211797  | 0,041219816 | down | -1,7998426 | ICA1L       | Homo sapiens islet cell autoantigen 1,69kDa-like (ICA1L), transcript variant 5, mRNA [NM_001288624]                                    |
| A_23_P430168  | 0,003701409 | up   | 1,5722562  | ICA1L       | islet cell autoantigen 1,69kDa-like [Source:HGNC Symbol;Acc:HGNC:14442] [ENST00000484561]                                              |
| A_21_P0014085 | 0,018689714 | down | -1,9524608 | ID2-AS1     | Homo sapiens ID2 antisense RNA 1 (head to head) (ID2-AS1), transcript variant 2, long non-coding RNA [NR_110154]                       |
| A_21_P0014098 | 0,03247594  | down | -1,7489321 | IDH1-AS1    | Homo sapiens IDH1 antisense RNA 1 (IDH1-AS1), long non-coding RNA [NR_046452]                                                          |
| A_24_P261929  | 0,001310512 | down | -1,602756  | IFI27L1     | Homo sapiens interferon, alpha-inducible protein 27-like 1 (IFI27L1), transcript variant 2, mRNA [NM_206949]                           |
| A_23_P152782  | 0,01758987  | down | -1,5925759 | IFI35       | Homo sapiens interferon-induced protein 35 (IFI35), mRNA [NM_005533]                                                                   |
| A_23_P157920  | 0,006975321 | up   | 1,6171018  | IFNA16      | Homo sapiens interferon, alpha 16 (IFNA16), mRNA [NM_002173]                                                                           |
| A_24_P403459  | 0,015372827 | down | -1,6661605 | IFNA4       | Homo sapiens interferon, alpha 4 (IFNA4), mRNA [NM_021068]                                                                             |
| A_23_P29036   | 0,002323007 | up   | 1,5480002  | IFNGR2      | Homo sapiens interferon gamma receptor 2 (interferon gamma transducer 1) (IFNGR2), mRNA [NM_005534]                                    |
| A_23_P74112   | 0,037152972 | up   | 1,5013652  | IFNLR1      | Homo sapiens interferon, lambda receptor 1 (IFNLR1), transcript variant 1, mRNA [NM_170743]                                            |
| A_24_P362881  | 0,03465929  | up   | 2,0243392  | IFT57       | Homo sapiens intraflagellar transport 57 (IFT57), mRNA [NM_018010]                                                                     |
| A_23_P48339   | 0,019701743 | down | -1,6018773 | IFT88       | Homo sapiens intraflagellar transport 88 (IFT88), transcript variant 1, mRNA [NM_175605]                                               |
| A_33_P3312819 | 0,019067045 | down | -1,7233582 | IGF2-AS     | Homo sapiens IGF2 antisense RNA (IGF2-AS), transcript variant 1, long non-coding RNA [NR_028044]                                       |
| A_23_P116435  | 1,47E-06    | down | -4,0888147 | IGF2-AS     | Homo sapiens IGF2 antisense RNA (IGF2-AS), transcript variant 1, long non-coding RNA [NR_028044]                                       |
| A_23_P250156  | 3,46E-04    | up   | 1,9915376  | IGF2BP2     | Homo sapiens insulin-like growth factor 2 mRNA binding protein 2 (IGF2BP2), transcript variant 1, mRNA [NM_006548]                     |
| A_33_P3324949 | 0,010903144 | down | -2,0044863 | IGF2BP2-AS1 | Homo sapiens cDNA FLJ32900 fis, clone TEST12005492. [AK057462]                                                                         |
| A_23_P42868   | 0,033802975 | up   | 1,7320195  | IGFBP1      | Homo sapiens insulin-like growth factor binding protein 1 (IGFBP1), mRNA [NM_000596]                                                   |
| A_23_P383009  | 0,031098576 | down | -2,0642736 | IGFBP5      | Homo sapiens insulin-like growth factor binding protein 5 (IGFBP5), mRNA [NM_000599]                                                   |
| A_33_P3240602 | 9,14E-04    | down | -2,6778626 | IGFL2       | Homo sapiens cDNA FLJ43766 fis, clone TEST12049246. [AK125754]                                                                         |
| A_24_P110558  | 0,002433789 | up   | 1,778843   | IGIP        | Homo sapiens IgA-inducing protein (IGIP), mRNA [NM_001007189]                                                                          |
| A_33_P3761915 | 0,001529081 | down | -1,9244936 | IGKV1D-13   | 602502772F1 NIH_MGC_77 Homo sapiens cDNA clone IMAGE:4616320 5', mRNA sequence [BG482625]                                              |
| A_24_P239076  | 0,01606543  | up   | 1,5508348  | IGLL1       | Homo sapiens immunoglobulin lambda-like polypeptide 1 (IGLL1), transcript variant 1, mRNA [NM_020070]                                  |
| A_23_P125303  | 0,010426924 | up   | 2,3475902  | IGSF1       | Homo sapiens immunoglobulin superfamily, member 1 (IGSF1), transcript variant 1, mRNA [NM_001555]                                      |
| A_21_P0011816 | 0,006135663 | down | -1,6586212 | IGSF3       | Homo sapiens immunoglobulin superfamily, member 3 (IGSF3), transcript variant 2, mRNA [NM_001007237]                                   |
| A_21_P0012337 | 0,012646686 | down | -1,9985874 | IGSF3       | Homo sapiens immunoglobulin superfamily, member 3 (IGSF3), transcript variant 2, mRNA [NM_001007237]                                   |
| A_33_P3372004 | 0,001524354 | up   | 3,0648525  | IGSF6       | Homo sapiens immunoglobulin superfamily, member 6 (IGSF6), mRNA [NM_005849]                                                            |
| A_24_P132518  | 0,001148596 | up   | 1,6198292  | IKBK        | Homo sapiens inhibitor of kappa light polypeptide gene enhancer in B-cells, kinase beta (IKBK), transcript variant 1, mRNA [NM_001556] |
| A_33_P3241756 | 0,010314094 | up   | 1,745149   | IKBK        | inhibitor of kappa light polypeptide gene enhancer in B-cells, kinase beta [Source:HGNC Symbol;Acc:HGNC:5960] [ENST00000517917]        |
| A_33_P3224795 | 0,007069314 | up   | 1,6368266  | IKZF5       | Homo sapiens IKAROS family zinc finger 5 (Pegasus) (IKZF5), transcript variant 1, mRNA [NM_001271840]                                  |
| A_33_P3421520 | 0,00315331  | up   | 1,6816151  | IKZF5       | Homo sapiens IKAROS family zinc finger 5 (Pegasus) (IKZF5), transcript variant 1, mRNA [NM_001271840]                                  |
| A_23_P126735  | 0,045100823 | down | -1,6721869 | IL10        | Homo sapiens interleukin 10 (IL10), mRNA [NM_000572]                                                                                   |
| A_23_P91943   | 0,008145737 | up   | 1,6686361  | IL12A       | Homo sapiens interleukin 12A (IL12A), mRNA [NM_000882]                                                                                 |
| A_23_P72077   | 0,030955851 | up   | 2,240614   | IL12RB2     | Homo sapiens interleukin 12 receptor, beta 2 (IL12RB2), transcript variant 1, mRNA [NM_001559]                                         |
| A_33_P3399267 | 0,03253483  | up   | 1,9193676  | IL15RA      | Homo sapiens interleukin 15 receptor, alpha (IL15RA), transcript variant 2, mRNA [NM_172200]                                           |
| A_24_P299423  | 0,010321686 | up   | 1,5832777  | IL16        | interleukin 16 [Source:HGNC Symbol;Acc:HGNC:5980] [ENST00000560241]                                                                    |
| A_23_P332820  | 1,38E-05    | down | -5,28419   | IL17A       | Homo sapiens interleukin 17A (IL17A), mRNA [NM_002190]                                                                                 |
| A_23_P167882  | 0,015199741 | down | -2,2103593 | IL17F       | Homo sapiens interleukin 17F (IL17F), mRNA [NM_052872]                                                                                 |
| A_33_P3224809 | 0,03583215  | up   | 1,5187645  | IL17RA      | Homo sapiens interleukin 17 receptor A (IL17RA), transcript variant 1, mRNA [NM_014339]                                                |
| A_32_P188860  | 0,009478212 | up   | 1,9564458  | IL17RD      | Homo sapiens interleukin 17 receptor D (IL17RD), mRNA [NM_017563]                                                                      |
| A_23_P104798  | 0,002976272 | up   | 1,8122756  | IL18        | Homo sapiens interleukin 18 (IL18), transcript variant 1, mRNA [NM_001562]                                                             |
| A_33_P3251876 | 0,016259922 | down | -2,0582955 | IL18R1      | Homo sapiens interleukin 18 receptor 1 (IL18R1), transcript variant 1, mRNA [NM_003855]                                                |
| A_33_P3211666 | 0,00116263  | down | -2,300176  | IL18R1      | Homo sapiens interleukin 18 receptor 1 (IL18R1), transcript variant 1, mRNA [NM_003855]                                                |
| A_24_P208567  | 0,01877997  | down | -1,7998474 | IL18R1      | Homo sapiens interleukin 18 receptor 1 (IL18R1), transcript variant 1, mRNA [NM_003855]                                                |
| A_33_P3221960 | 0,011177207 | down | -2,0176184 | IL18RAP     | Homo sapiens interleukin 18 receptor accessory protein (IL18RAP), mRNA [NM_003853]                                                     |

|                |             |      |            |           |                                                                                                                            |
|----------------|-------------|------|------------|-----------|----------------------------------------------------------------------------------------------------------------------------|
| A_21_P0000070  | 0,0157305   | down | -1,8858325 | IL1RAP    | Homo sapiens interleukin 1 receptor accessory protein (IL1RAP), transcript variant 6, mRNA [NM_001167931]                  |
| A_33_P3246829  | 0,044434246 | up   | 1,716623   | IL1RN     | Homo sapiens interleukin 1 receptor antagonist (IL1RN), transcript variant 4, mRNA [NM_173843]                             |
| A_23_P46482    | 0,034308128 | up   | 2,0915449  | IL20      | Homo sapiens interleukin 20 (IL20), mRNA [NM_018724]                                                                       |
| A_33_P3677020  | 2,17E-04    | down | -2,045414  | IL21R-AS1 | Homo sapiens IL21R antisense RNA 1 (IL21R-AS1), long non-coding RNA [NR_037158]                                            |
| A_33_P3290780  | 0,002509799 | up   | 3,5172255  | IL24      | Homo sapiens interleukin 24 (IL24), transcript variant 3, mRNA [NM_001185156]                                              |
| A_33_P3284933  | 6,81E-04    | down | -1,7218941 | IL27      | Homo sapiens interleukin 27 (IL27), mRNA [NM_145659]                                                                       |
| A_23_P148473   | 0,004959405 | down | -2,2535973 | IL2RG     | Homo sapiens interleukin 2 receptor, gamma (IL2RG), mRNA [NM_000206]                                                       |
| A_33_P3691168  | 0,00113698  | down | -2,4043922 | IL31RA    | Homo sapiens interleukin 31 receptor A (IL31RA), transcript variant 7, mRNA [NM_001297572]                                 |
| A_32_P217750   | 0,001589689 | up   | 2,2130914  | IL3RA     | Homo sapiens interleukin 3 receptor, alpha (low affinity) (IL3RA), transcript variant 1, mRNA [NM_002183]                  |
| A_23_P213706   | 0,003143349 | up   | 1,8149196  | IL4       | Homo sapiens interleukin 4 (IL4), transcript variant 1, mRNA [NM_000589]                                                   |
| A_33_P3328254  | 0,002448818 | up   | 1,607555   | IL5RA     | Homo sapiens interleukin 5 receptor, alpha (IL5RA), transcript variant 3, mRNA [NM_175725]                                 |
| A_21_P0000171  | 0,025667274 | up   | 1,6281902  | IL6R      | Homo sapiens interleukin 6 receptor (IL6R), transcript variant 3, mRNA [NM_001206866]                                      |
| A_23_P404494   | 0,004672748 | down | -3,3858967 | IL7R      | Homo sapiens interleukin 7 receptor (IL7R), transcript variant 1, mRNA [NM_002185]                                         |
| A_23_P109907   | 0,014406681 | down | -1,6118205 | ILDR1     | Homo sapiens immunoglobulin-like domain containing receptor 1 (ILDR1), transcript variant 2, mRNA [NM_175924]              |
| A_33_P3219745  | 0,00181664  | up   | 3,1036162  | ILF2      | interleukin enhancer binding factor 2 [Source:HGNC Symbol;Acc:HGNC:6037] [ENST00000368681]                                 |
| A_23_P434944   | 0,001673754 | up   | 1,6360632  | ILF3      | Homo sapiens interleukin enhancer binding factor 3, 90kDa (ILF3), transcript variant 2, mRNA [NM_004516]                   |
| A_33_P3314468  | 0,003313095 | down | -1,5327259 | IMMT      | Homo sapiens inner membrane protein, mitochondrial (IMMT), transcript variant 3, mRNA [NM_001100170]                       |
| A_23_P321034   | 7,31E-04    | up   | 1,5692724  | INADL     | Homo sapiens InaD-like (Drosophila) (INADL), mRNA [NM_176877]                                                              |
| A_23_P116387   | 0,00631718  | up   | 1,6778177  | INCENP    | Homo sapiens inner centromere protein antigens 135/155kDa (INCENP), transcript variant 1, mRNA [NM_001040694]              |
| A_23_P153964   | 0,034590907 | up   | 1,6755359  | INHBB     | Homo sapiens inhibin, beta B (INHBB), mRNA [NM_002193]                                                                     |
| A_24_P155502   | 2,80E-04    | down | -4,241902  | INHBC     | Homo sapiens inhibin, beta C (INHBC), mRNA [NM_005538]                                                                     |
| A_24_P141707   | 0,003215164 | down | -3,1024585 | INHBE     | Homo sapiens inhibin, beta E (INHBE), mRNA [NM_031479]                                                                     |
| A_33_P3326822  | 0,03087595  | down | -1,5025284 | INMT      | indolethylamine N-methyltransferase [Source:HGNC Symbol;Acc:HGNC:6069] [ENST00000461246]                                   |
| A_33_P3330716  | 0,001911539 | up   | 1,5748763  | INO80D    | Homo sapiens INO80 complex subunit D (INO80D), mRNA [NM_017759]                                                            |
| A_24_P317835   | 0,001065744 | up   | 1,6896206  | INPP5E    | Homo sapiens inositol polyphosphate-5-phosphatase, 72 kDa (INPP5E), mRNA [NM_019892]                                       |
| A_23_P1981     | 0,005422625 | down | -2,7124164 | INS       | Homo sapiens insulin (INS), transcript variant 1, mRNA [NM_000207]                                                         |
| A_33_P3814721  | 0,006613183 | up   | 3,1322021  | INSC      | Homo sapiens inscuteable homolog (Drosophila) (INSC), transcript variant 1, mRNA [NM_001031853]                            |
| A_24_P944458   | 8,63E-04    | up   | 1,5913138  | INSIG2    | Homo sapiens insulin induced gene 2 (INSIG2), mRNA [NM_016133]                                                             |
| A_23_P83012    | 0,003850275 | up   | 1,6707414  | INSL6     | Homo sapiens insulin-like 6 (INSL6), mRNA [NM_007179]                                                                      |
| A_33_P3335725  | 0,002509327 | up   | 2,007699   | INSR      | Homo sapiens insulin receptor (INSR), transcript variant 1, mRNA [NM_000208]                                               |
| A_23_P420269   | 0,001734262 | up   | 1,769534   | INTS2     | Homo sapiens integrator complex subunit 2 (INTS2), transcript variant 1, mRNA [NM_020748]                                  |
| A_23_P126757   | 0,003251835 | up   | 1,6706553  | INTS3     | Homo sapiens integrator complex subunit 3 (INTS3), mRNA [NM_023015]                                                        |
| A_33_P3320804  | 5,93E-04    | down | -1,8044443 | IP6K1     | Homo sapiens inositol hexakisphosphate kinase 1 (IP6K1), transcript variant 3, mRNA [NM_001242829]                         |
| A_24_P940059   | 0,008110121 | up   | 1,7877446  | IPCEF1    | Homo sapiens interaction protein for cytohesin exchange factors 1 (IPCEF1), transcript variant 3, mRNA [NM_015553]         |
| A_23_P115036   | 0,003704742 | up   | 1,5571901  | IPO13     | Homo sapiens importin 13 (IPO13), mRNA [NM_014652]                                                                         |
| A_19_P00802141 | 0,007965564 | up   | 1,5040046  | IPO7      | Homo sapiens importin 7 (IPO7), mRNA [NM_006391]                                                                           |
| A_33_P3360917  | 0,03173101  | up   | 1,606928   | IPO9      | Homo sapiens importin 9 (IPO9), mRNA [NM_018085]                                                                           |
| A_23_P19852    | 0,030193271 | up   | 1,6077543  | IQCE      | Homo sapiens IQ motif containing E (IQCE), transcript variant 1, mRNA [NM_152558]                                          |
| A_32_P165933   | 8,46E-04    | down | -2,9810503 | IQCF2     | Homo sapiens IQ motif containing F2 (IQCF2), mRNA [NM_203424]                                                              |
| A_21_P0000726  | 0,020541223 | up   | 2,6988564  | IQCF4     | Homo sapiens IQ motif containing F5 pseudogene (IQCF4), transcript variant 3, non-coding RNA [NR_038215]                   |
| A_33_P3209581  | 7,34E-04    | down | -3,0256817 | IQSEC3    | Homo sapiens IQ motif and Sec7 domain 3 (IQSEC3), transcript variant 1, mRNA [NM_001170738]                                |
| A_24_P203298   | 0,004053007 | up   | 1,5862942  | IQUB      | Homo sapiens IQ motif and ubiquitin domain containing (IQUB), transcript variant 1, mRNA [NM_178827]                       |
| A_32_P21474    | 0,006831886 | down | -1,7194406 | IRAK1BP1  | Homo sapiens interleukin-1 receptor-associated kinase 1 binding protein 1 (IRAK1BP1), mRNA [NM_001010844]                  |
| A_33_P3352970  | 0,001574826 | up   | 1,9624866  | IRAK2     | Homo sapiens interleukin-1 receptor-associated kinase 2 (IRAK2), mRNA [NM_001570]                                          |
| A_23_P162300   | 0,034158435 | up   | 2,292764   | IRAK3     | Homo sapiens interleukin-1 receptor-associated kinase 3 (IRAK3), transcript variant 1, mRNA [NM_007199]                    |
| A_24_P497186   | 2,89E-04    | up   | 1,6401263  | IRF2BP2   | Homo sapiens interferon regulatory factor 2 binding protein 2 (IRF2BP2), transcript variant 1, mRNA [NM_182972]            |
| A_23_P354547   | 8,60E-04    | up   | 2,4298775  | IRF9      | interferon regulatory factor 9 [Source:HGNC Symbol;Acc:HGNC:6131] [ENST00000558468]                                        |
| A_23_P65442    | 5,45E-04    | up   | 1,7469696  | IRF9      | Homo sapiens interferon regulatory factor 9 (IRF9), mRNA [NM_006084]                                                       |
| A_33_P3359022  | 0,006748874 | up   | 3,2121844  | IRGC      | Homo sapiens immunity-related GTPase family, cinema (IRGC), mRNA [NM_019612]                                               |
| A_33_P3364038  | 3,44E-04    | up   | 3,423585   | IRGM      | Homo sapiens immunity-related GTPase family, M (IRGM), mRNA [NM_001145805]                                                 |
| A_24_P225679   | 0,04138997  | up   | 1,5800693  | IRS1      | Homo sapiens insulin receptor substrate 1 (IRS1), mRNA [NM_005544]                                                         |
| A_23_P156025   | 0,00359778  | up   | 1,6172497  | IRX2      | Homo sapiens iroquois homeobox 2 (IRX2), transcript variant 1, mRNA [NM_033267]                                            |
| A_33_P3297562  | 0,001465897 | up   | 1,8113352  | IRX2      | Homo sapiens iroquois homeobox 2 (IRX2), transcript variant 1, mRNA [NM_033267]                                            |
| A_24_P387609   | 0,020372847 | up   | 1,9411589  | ISCA1     | Homo sapiens iron-sulfur cluster assembly 1 (ISCA1), mRNA [NM_030940]                                                      |
| A_23_P81529    | 0,019934908 | down | -2,0678053 | ISL1      | Homo sapiens ISL LIM homeobox 1 (ISL1), mRNA [NM_002202]                                                                   |
| A_23_P3312     | 0,020137306 | down | -2,125707  | ISLR      | Homo sapiens immunoglobulin superfamily containing leucine-rich repeat (ISLR), transcript variant 1, mRNA [NM_005545]      |
| A_23_P206759   | 4,51E-04    | up   | 2,1346786  | IST1      | Homo sapiens increased sodium tolerance 1 homolog (yeast) (IST1), transcript variant 2, mRNA [NM_014761]                   |
| A_23_P206022   | 8,76E-04    | down | -1,8895589 | ITGA11    | Homo sapiens integrin, alpha 11 (ITGA11), mRNA [NM_001004439]                                                              |
| A_23_P252193   | 0,001025169 | down | -1,9867948 | ITGA9     | Homo sapiens integrin, alpha 9 (ITGA9), mRNA [NM_002207]                                                                   |
| A_24_P366652   | 1,16E-04    | down | -2,513293  | ITGAD     | Homo sapiens integrin, alpha D (ITGAD), mRNA [NM_005353]                                                                   |
| A_23_P124108   | 0,001232402 | down | -3,5196462 | ITGAM     | Homo sapiens integrin, alpha M (complement component 3 receptor 3 subunit) (ITGAM), transcript variant 2, mRNA [NM_000632] |

|                |             |      |            |            |                                                                                                                                                              |
|----------------|-------------|------|------------|------------|--------------------------------------------------------------------------------------------------------------------------------------------------------------|
| A_23_P312132   | 0,013147151 | down | -2,0367305 | ITGAX      | Homo sapiens integrin, alpha X (complement component 3 receptor 4 subunit) (ITGAX), transcript variant 2, mRNA [NM_000887]                                   |
| A_33_P3216227  | 0,025302926 | up   | 2,444929   | ITGB1BP1   | integrin beta 1 binding protein 1 [Source:HGNC Symbol;Acc:HGNC:23927] [ENST00000360635]                                                                      |
| A_23_P45424    | 0,013169362 | up   | 1,5521921  | ITGB1BP2   | Homo sapiens integrin beta 1 binding protein (melusin) 2 (ITGB1BP2), transcript variant 1, mRNA [NM_012278]                                                  |
| A_23_P430411   | 0,022813078 | down | -1,6540679 | ITGB2      | integrin, beta 2 (complement component 3 receptor 3 and 4 subunit) [Source:HGNC Symbol;Acc:HGNC:6155] [ENST00000610622]                                      |
| A_21_P0000759  | 1,75E-06    | down | -5,2900457 | ITGB2-AS1  | Homo sapiens ITGB2 antisense RNA 1 (ITGB2-AS1), transcript variant 1, long non-coding RNA [NR_038311]                                                        |
| A_24_P220855   | 0,008061946 | up   | 1,6843562  | ITIH5      | Homo sapiens inter-alpha-trypsin inhibitor heavy chain family, member 5 (ITIH5), transcript variant 3, mRNA [NM_001001851]                                   |
| A_24_P292253   | 0,005352265 | up   | 1,5454142  | ITIH5      | Homo sapiens inter-alpha-trypsin inhibitor heavy chain family, member 5 (ITIH5), transcript variant 1, mRNA [NM_030569]                                      |
| A_33_P3363071  | 7,18E-05    | down | -2,4234066 | ITIH6      | Homo sapiens inter-alpha-trypsin inhibitor heavy chain family, member 6 (ITIH6), mRNA [NM_198510]                                                            |
| A_24_P202567   | 3,43E-04    | up   | 1,7551434  | ITPKC      | Homo sapiens inositol-trisphosphate 3-kinase C (ITPKC), mRNA [NM_025194]                                                                                     |
| A_23_P19517    | 7,02E-05    | up   | 1,9720839  | ITPR3      | Homo sapiens inositol 1,4,5-trisphosphate receptor, type 3 (ITPR3), mRNA [NM_002224]                                                                         |
| A_33_P3269718  | 0,04000611  | down | -1,5930502 | IVD        | Homo sapiens isovaleryl-CoA dehydrogenase (IVD), transcript variant 2, mRNA [NM_001159508]                                                                   |
| A_24_P206702   | 0,015672725 | down | -1,8684233 | IZUMO1R    | Homo sapiens IZUMO1 receptor, JUNO (IZUMO1R), mRNA [NM_001199206]                                                                                            |
| A_23_P101521   | 0,005823297 | down | -2,1478875 | IZUMO2     | Homo sapiens IZUMO family member 2 (IZUMO2), mRNA [NM_152358]                                                                                                |
| A_33_P3282230  | 0,030880097 | up   | 2,845994   | IZUMO3     | Homo sapiens IZUMO family member 3 (IZUMO3), mRNA [NM_001271706]                                                                                             |
| A_33_P3221114  | 0,0016005   | up   | 2,7967262  | JAKMIP1    | Homo sapiens janus kinase and microtubule interacting protein 1 (JAKMIP1), transcript variant 2, mRNA [NM_144720]                                            |
| A_33_P3352088  | 0,001488103 | up   | 3,230823   | JAKMIP3    | Homo sapiens Janus kinase and microtubule interacting protein 3 (JAKMIP3), mRNA [NM_001105521]                                                               |
| A_33_P3340224  | 0,018708527 | down | -1,8299342 | JAZF1-AS1  | Homo sapiens JAZF1 antisense RNA 1 (JAZF1-AS1), long non-coding RNA [NR_034097]                                                                              |
| A_23_P311616   | 4,48E-04    | up   | 1,807664   | JMJD6      | Homo sapiens jumonji domain containing 6 (JMJD6), transcript variant 2, mRNA [NM_015167]                                                                     |
| A_33_P3220929  | 0,022468219 | down | -1,7113514 | JOSD2      | Homo sapiens Josephin domain containing 2 (JOSD2), transcript variant 3, mRNA [NM_001270641]                                                                 |
| A_23_P394395   | 2,51E-04    | up   | 2,8895512  | JPH2       | Homo sapiens junctophilin 2 (JPH2), transcript variant 1, mRNA [NM_020433]                                                                                   |
| A_23_P397320   | 0,013712353 | up   | 2,936744   | JSRP1      | Homo sapiens junctional sarcoplasmic reticulum protein 1 (JSRP1), mRNA [NM_144616]                                                                           |
| A_24_P241815   | 0,022797745 | up   | 1,844299   | JUNB       | Homo sapiens jun B proto-oncogene (JUNB), mRNA [NM_002229]                                                                                                   |
| A_23_P500130   | 0,00268663  | up   | 1,6832846  | KANK1      | Homo sapiens KN motif and ankyrin repeat domains 1 (KANK1), transcript variant 2, mRNA [NM_153186]                                                           |
| A_23_P50426    | 8,93E-05    | up   | 1,9528491  | KANK2      | Homo sapiens KN motif and ankyrin repeat domains 2 (KANK2), transcript variant 1, mRNA [NM_015493]                                                           |
| A_33_P3326020  | 0,012822941 | down | -1,8918476 | KANK3      | KN motif and ankyrin repeat domains 3 [Source:HGNC Symbol;Acc:HGNC:24796] [ENST00000593649]                                                                  |
| A_19_P00809076 | 0,023317711 | down | -1,5426443 | KANSL1-AS1 | Homo sapiens KANSL1 antisense RNA 1 (KANSL1-AS1), long non-coding RNA [NR_034172]                                                                            |
| A_32_P159651   | 0,038649257 | up   | 2,015811   | KAT2B      | Homo sapiens K(lysine) acetyltransferase 2B (KAT2B), mRNA [NM_003884]                                                                                        |
| A_21_P0014695  | 7,40E-04    | down | -2,180699  | KATNAL2    | PREDICTED: Homo sapiens katanin p60 subunit A-like 2 (KATNAL2), transcript variant X2, mRNA [XM_005258358]                                                   |
| A_33_P3396129  | 0,01530918  | down | -1,8324571 | KATNB1     | katanin p80 (WD repeat containing) subunit B 1 [Source:HGNC Symbol;Acc:HGNC:6217] [ENST00000566611]                                                          |
| A_33_P3295029  | 0,027394993 | up   | 2,070759   | KBTBD12    | Homo sapiens kelch repeat and BTB (POZ) domain containing 12 (KBTBD12), mRNA [NM_207335]                                                                     |
| A_33_P3306192  | 5,56E-04    | down | -1,7332128 | KBTBD13    | Homo sapiens kelch repeat and BTB (POZ) domain containing 13 (KBTBD13), mRNA [NM_001101362]                                                                  |
| A_24_P12539    | 2,84E-05    | up   | 2,2051759  | KBTBD2     | Homo sapiens kelch repeat and BTB (POZ) domain containing 2 (KBTBD2), mRNA [NM_015483]                                                                       |
| A_23_P25605    | 0,00165452  | up   | 1,7885392  | KBTBD7     | Homo sapiens kelch repeat and BTB (POZ) domain containing 7 (KBTBD7), mRNA [NM_032138]                                                                       |
| A_23_P48229    | 0,030473076 | up   | 2,183206   | KCNA1      | Homo sapiens potassium channel, voltage gated shaker related subfamily A, member 1 (KCNA1), mRNA [NM_000217]                                                 |
| A_24_P498652   | 0,03311174  | up   | 1,5751976  | KCNA1      | Homo sapiens potassium channel, voltage gated shaker related subfamily A, member 1 (KCNA1), mRNA [NM_000217]                                                 |
| A_23_P126528   | 0,025002083 | down | -1,8944923 | KCNA10     | Homo sapiens potassium channel, voltage gated shaker related subfamily A, member 10 (KCNA10), mRNA [NM_005549]                                               |
| A_19_P00803558 | 0,017993955 | down | -1,8183241 | KCNA6      | Homo sapiens potassium channel, voltage gated shaker related subfamily A, member 6 (KCNA6), mRNA [NM_002235]                                                 |
| A_24_P182929   | 0,003607938 | down | -2,2805445 | KCNAB1     | Homo sapiens potassium channel, voltage gated subfamily A regulatory beta subunit 1 (KCNAB1), transcript variant 2, mRNA [NM_003471]                         |
| A_33_P3237379  | 0,005980671 | up   | 1,528615   | KCNK1      | Homo sapiens potassium channel, voltage gated Shaw related subfamily C, member 1 (KCNK1), transcript variant 2, mRNA [NM_004976]                             |
| A_33_P3338793  | 0,002044239 | down | -2,766663  | KCNK3      | Homo sapiens potassium channel, voltage gated Shaw related subfamily C, member 3 (KCNK3), mRNA [NM_004977]                                                   |
| A_23_P101516   | 0,004299892 | down | -1,802982  | KCNK3      | Homo sapiens potassium channel, voltage gated Shaw related subfamily C, member 3 (KCNK3), mRNA [NM_004977]                                                   |
| A_23_P12079    | 0,002350793 | down | -1,6121246 | KCNK4      | Homo sapiens potassium channel, voltage gated Shaw related subfamily C, member 4 (KCNK4), transcript variant 3, mRNA [NM_001039574]                          |
| A_21_P0001165  | 0,007664676 | up   | 2,2003453  | KCNK4-AS1  | Homo sapiens KCNK4 antisense RNA 1 (head to head) (KCNK4-AS1), long non-coding RNA [NR_046546]                                                               |
| A_23_P154855   | 0,024369469 | down | -1,735821  | KCNE1      | Homo sapiens potassium voltage-gated channel, Isk-related family, member 1 (KCNE1), transcript variant 2, mRNA [NM_000219]                                   |
| A_33_P3246448  | 1,69E-05    | down | -2,2173588 | KCNE4      | Homo sapiens potassium channel, voltage gated subfamily E regulatory beta subunit 4 (KCNE4), mRNA [NM_080671]                                                |
| A_23_P256641   | 0,002490502 | down | -2,5361445 | KCNE5      | Homo sapiens potassium channel, voltage gated subfamily E regulatory beta subunit 5 (KCNE5), mRNA [NM_012282]                                                |
| A_23_P377882   | 9,42E-04    | down | -3,8824236 | KCNH2      | Homo sapiens potassium voltage-gated channel, subfamily H (eag-related), member 2 (KCNH2), transcript variant 2, mRNA [NM_172056]                            |
| A_33_P3253672  | 0,010540944 | down | -1,7743999 | KCNH3      | Homo sapiens potassium channel, voltage gated eag related subfamily H, member 3 (KCNH3), mRNA [NM_012284]                                                    |
| A_33_P3314857  | 0,002971171 | up   | 1,7871902  | KCNJ13     | Homo sapiens potassium channel, inwardly rectifying subfamily J, member 13 (KCNJ13), transcript variant 1, mRNA [NM_002242]                                  |
| A_23_P130764   | 0,004105751 | up   | 1,5269767  | KCNJ14     | Homo sapiens potassium channel, inwardly rectifying subfamily J, member 14 (KCNJ14), mRNA [NM_013348]                                                        |
| A_23_P501193   | 0,00730458  | down | -1,7539414 | KCNJ16     | Homo sapiens potassium channel, inwardly rectifying subfamily J, member 16 (KCNJ16), transcript variant 2, mRNA [NM_170741]                                  |
| A_33_P3374778  | 0,001621819 | down | -2,4872687 | KCNJ2-AS1  | Homo sapiens KCNJ2 antisense RNA 1 (head to head) (KCNJ2-AS1), long non-coding RNA [NR_036534]                                                               |
| A_23_P29057    | 3,65E-04    | up   | 2,7525916  | KCNJ6      | Homo sapiens potassium channel, inwardly rectifying subfamily J, member 6 (KCNJ6), mRNA [NM_002240]                                                          |
| A_24_P112032   | 0,001694284 | up   | 1,9100335  | KCNK17     | Homo sapiens potassium channel, two pore domain subfamily K, member 17 (KCNK17), transcript variant 1, mRNA [NM_031460]                                      |
| A_23_P319423   | 0,022692606 | down | -1,9197071 | KCNK5      | Homo sapiens potassium channel, two pore domain subfamily K, member 5 (KCNK5), mRNA [NM_003740]                                                              |
| A_23_P111978   | 0,003435899 | down | -3,1017575 | KCNK9      | Homo sapiens potassium channel, two pore domain subfamily K, member 9 (KCNK9), transcript variant 1, mRNA [NM_001282534]                                     |
| A_24_P206121   | 0,001872998 | down | -1,6520807 | KCNMB1     | Homo sapiens potassium channel subfamily M regulatory beta subunit 1 (KCNMB1), mRNA [NM_004137]                                                              |
| A_23_P500353   | 0,025271948 | down | -2,0468364 | KCNN2      | Homo sapiens potassium channel, calcium activated intermediate/small conductance subfamily N alpha, member 2 (KCNN2), transcript variant 1, mRNA [NM_021614] |
| A_23_P67529    | 0,040988214 | up   | 2,169673   | KCNN4      | Homo sapiens potassium channel, calcium activated intermediate/small conductance subfamily N alpha, member 4 (KCNN4), mRNA [NM_002250]                       |
| A_33_P3247331  | 0,02588216  | up   | 2,013642   | KCNQ1      | potassium voltage-gated channel, KQT-like subfamily, member 1 [Source:HGNC Symbol;Acc:HGNC:6294] [ENST00000345015]                                           |
| A_33_P3360753  | 0,003169136 | down | -1,5962949 | KCNQ2      | potassium voltage-gated channel, KQT-like subfamily, member 2 [Source:HGNC Symbol;Acc:HGNC:6296] [ENST00000370221]                                           |



|                |             |      |            |           |                                                                                                                                                     |
|----------------|-------------|------|------------|-----------|-----------------------------------------------------------------------------------------------------------------------------------------------------|
| A_33_P3395823  | 7,59E-05    | down | -5,3014545 | KCNQ2     | Homo sapiens potassium channel, voltage gated KQT-like subfamily Q, member 2 (KCNQ2), transcript variant 5, mRNA [NM_172109]                        |
| A_23_P34424    | 0,004937258 | down | -3,1257198 | KCNQ4     | Homo sapiens potassium channel, voltage gated KQT-like subfamily Q, member 4 (KCNQ4), transcript variant 1, mRNA [NM_004700]                        |
| A_33_P3339481  | 0,00879766  | up   | 2,02252    | KCNQ5     | potassium voltage-gated channel, KQT-like subfamily, member 5 [Source:HGNC Symbol;Acc:HGNC:6299] [ENST00000370392]                                  |
| A_23_P394377   | 0,001783268 | up   | 2,0775702  | KCNRG     | Homo sapiens potassium channel regulator (KCNRG), transcript variant 2, mRNA [NM_199464]                                                            |
| A_33_P3281613  | 0,005022806 | down | -1,7147918 | KCNT1     | Homo sapiens cDNA FLJ41282 fis, clone BRAMY2037823. [AK123276]                                                                                      |
| A_23_P162165   | 0,048158426 | down | -1,9417099 | KCTD14    | Homo sapiens potassium channel tetramerization domain containing 14 (KCTD14), transcript variant 1, mRNA [NM_023930]                                |
| A_24_P373844   | 0,005817683 | up   | 1,7453177  | KCTD15    | Homo sapiens potassium channel tetramerization domain containing 15 (KCTD15), transcript variant 1, mRNA [NM_024076]                                |
| A_24_P307808   | 0,00391396  | down | -2,4891002 | KCTD16    | Homo sapiens potassium channel tetramerization domain containing 16 (KCTD16), mRNA [NM_020768]                                                      |
| A_33_P3255131  | 0,001361013 | down | -2,552722  | KCTD19    | Homo sapiens potassium channel tetramerization domain containing 19 (KCTD19), mRNA [NM_001100915]                                                   |
| A_24_P324011   | 0,008922031 | down | -1,5242391 | KCTD2     | Homo sapiens potassium channel tetramerization domain containing 2 (KCTD2), transcript variant 1, mRNA [NM_015353]                                  |
| A_23_P160406   | 0,003268658 | up   | 1,5889231  | KCTD3     | Homo sapiens potassium channel tetramerization domain containing 3 (KCTD3), mRNA [NM_016121]                                                        |
| A_23_P385246   | 0,001701486 | up   | 1,6992344  | KCTD6     | Homo sapiens potassium channel tetramerization domain containing 6 (KCTD6), transcript variant 1, mRNA [NM_153331]                                  |
| A_33_P3298960  | 0,048527516 | down | -1,7296618 | KDELC2    | Homo sapiens KDEL (Lys-Asp-Glu-Leu) containing 2 (KDELC2), mRNA [NM_153705]                                                                         |
| A_24_P93754    | 0,003555759 | up   | 2,234351   | KDM4C     | lysine (K)-specific demethylase 4C [Source:HGNC Symbol;Acc:HGNC:17071] [ENST00000381306]                                                            |
| A_33_P3340718  | 0,031532235 | up   | 1,5025992  | KDM6A     | Homo sapiens lysine (K)-specific demethylase 6A (KDM6A), transcript variant 1, mRNA [NM_001291415]                                                  |
| A_24_P942630   | 0,006956785 | up   | 1,68332    | KDM6B     | Homo sapiens lysine (K)-specific demethylase 6B (KDM6B), mRNA [NM_001080424]                                                                        |
| A_23_P359897   | 0,003200207 | up   | 1,9619479  | KDM7A     | Homo sapiens lysine (K)-specific demethylase 7A (KDM7A), mRNA [NM_030647]                                                                           |
| A_33_P3806721  | 0,031026712 | down | -1,5671064 | KDM8      | Homo sapiens lysine (K)-specific demethylase 8 (KDM8), transcript variant 1, mRNA [NM_001145348]                                                    |
| A_32_P86905    | 3,27E-05    | down | -3,2722602 | KGFLP2    | Homo sapiens keratinocyte growth factor-like protein 2 (KGFLP2), non-coding RNA [NR_003670]                                                         |
| A_19_P00325810 | 0,023336338 | down | -1,9546651 | KHDC1     | Homo sapiens KH homology domain containing 1 (KHDC1), transcript variant 3, non-coding RNA [NR_027005]                                              |
| A_33_P3394727  | 0,011118636 | up   | 2,2089422  | KHDRBS3   | Homo sapiens KH domain containing, RNA binding, signal transduction associated 3 (KHDRBS3), mRNA [NM_006558]                                        |
| A_24_P134235   | 0,017630188 | down | -1,5254782 | KHSRP     | Homo sapiens KH-type splicing regulatory protein (KHSRP), mRNA [NM_003685]                                                                          |
| A_24_P79617    | 0,016722454 | up   | 1,7737057  | KIAA0040  | Homo sapiens KIAA0040 (KIAA0040), transcript variant 2, mRNA [NM_014656]                                                                            |
| A_23_P213369   | 0,00168678  | down | -1,6433421 | KIAA0141  | Homo sapiens KIAA0141 (KIAA0141), transcript variant 1, mRNA [NM_014773]                                                                            |
| A_23_P304171   | 0,001105014 | up   | 1,9433224  | KIAA0226  | Homo sapiens KIAA0226 (KIAA0226), transcript variant 1, mRNA [NM_001145642]                                                                         |
| A_23_P324490   | 0,001412007 | up   | 1,5876878  | KIAA0355  | Homo sapiens KIAA0355 (KIAA0355), mRNA [NM_014686]                                                                                                  |
| A_24_P912372   | 5,64E-05    | up   | 2,714933   | KIAA0754  | Homo sapiens KIAA0754 (KIAA0754), mRNA [NM_015038]                                                                                                  |
| A_23_P74467    | 4,24E-04    | up   | 2,1971421  | KIAA0907  | Homo sapiens KIAA0907 (KIAA0907), mRNA [NM_014949]                                                                                                  |
| A_24_P325176   | 2,45E-04    | up   | 1,8764067  | KIAA1109  | Homo sapiens KIAA1109 (KIAA1109), mRNA [NM_015312]                                                                                                  |
| A_23_P393880   | 0,009121237 | up   | 1,8931862  | KIAA1244  | Homo sapiens KIAA1244 (KIAA1244), mRNA [NM_020340]                                                                                                  |
| A_32_P163739   | 0,021933738 | down | -1,9898101 | KIAA1257  | Homo sapiens KIAA1257 (KIAA1257), mRNA [NM_020741]                                                                                                  |
| A_33_P3256793  | 0,011772674 | down | -2,008441  | KIAA1324  | Homo sapiens KIAA1324 (KIAA1324), transcript variant 1, mRNA [NM_020775]                                                                            |
| A_23_P64121    | 0,048027918 | up   | 1,8075274  | KIAA1549L | Homo sapiens KIAA1549-like (KIAA1549L), mRNA [NM_012194]                                                                                            |
| A_23_P98930    | 0,003942034 | up   | 1,7568319  | KIAA1551  | Homo sapiens KIAA1551 (KIAA1551), mRNA [NM_018169]                                                                                                  |
| A_24_P101047   | 0,034226704 | down | -2,5048814 | KIAA1586  | Homo sapiens KIAA1586 (KIAA1586), transcript variant 1, mRNA [NM_020931]                                                                            |
| A_33_P3382236  | 0,012024356 | down | -1,6863831 | KIAA1598  | Homo sapiens KIAA1598 (KIAA1598), transcript variant 4, mRNA [NM_001258299]                                                                         |
| A_32_P176594   | 0,002390355 | down | -2,447257  | KIAA1614  | Homo sapiens KIAA1614 (KIAA1614), mRNA [NM_020950]                                                                                                  |
| A_23_P309619   | 1,93E-04    | up   | 2,2849314  | KIAA1671  | Homo sapiens KIAA1671 (KIAA1671), mRNA [NM_001145206]                                                                                               |
| A_19_P00805272 | 0,009414494 | up   | 1,5493217  | KIAA1671  | Homo sapiens KIAA1671 (KIAA1671), mRNA [NM_001145206]                                                                                               |
| A_33_P3267482  | 0,018449912 | down | -2,229552  | KIAA1804  | Homo sapiens mixed lineage kinase 4 (KIAA1804), mRNA [NM_032435]                                                                                    |
| A_24_P265265   | 0,008679732 | up   | 2,0363975  | KIAA1804  | Mitogen-activated protein kinase kinase kinase MLK4 [Source:UniProtKB/Swiss-Prot;Acc:Q5TCX8] [ENST00000366623]                                      |
| A_33_P3290955  | 0,043903414 | down | -1,5877137 | KIAA1875  | Homo sapiens KIAA1875 (KIAA1875), long non-coding RNA [NR_024207]                                                                                   |
| A_33_P3307945  | 0,009050739 | up   | 1,922386   | KIAA2012  | Homo sapiens KIAA2012 (KIAA2012), mRNA [NM_001277372]                                                                                               |
| A_24_P97145    | 0,014629508 | up   | 1,6042181  | KIDINS220 | Homo sapiens kinase D-interacting substrate, 220kDa (KIDINS220), mRNA [NM_020738]                                                                   |
| A_23_P147388   | 0,007999312 | up   | 2,1238241  | KIF13B    | Homo sapiens kinesin family member 13B (KIF13B), mRNA [NM_015254]                                                                                   |
| A_23_P400515   | 0,04488299  | up   | 1,629718   | KIF17     | Homo sapiens kinesin family member 17 (KIF17), transcript variant 1, mRNA [NM_020816]                                                               |
| A_24_P233014   | 0,013659262 | up   | 2,5639615  | KIF19     | Homo sapiens kinesin family member 19 (KIF19), mRNA [NM_153209]                                                                                     |
| A_24_P145066   | 3,91E-06    | up   | 2,443308   | KIF1B     | Homo sapiens kinesin family member 1B (KIF1B), transcript variant 2, mRNA [NM_183416]                                                               |
| A_23_P201287   | 0,001660282 | up   | 1,5956471  | KIF1B     | Homo sapiens kinesin family member 1B (KIF1B), transcript variant 1, mRNA [NM_015074]                                                               |
| A_33_P3221665  | 0,001838957 | down | -2,2452626 | KIF21B    | Homo sapiens kinesin family member 21B (KIF21B), transcript variant 3, mRNA [NM_001252102]                                                          |
| A_33_P3350638  | 0,003604109 | down | -1,8013489 | KIF22     | kinesin family member 22 [Source:HGNC Symbol;Acc:HGNC:6391] [ENST00000563666]                                                                       |
| A_33_P3396746  | 8,85E-05    | down | -2,7450712 | KIF26B    | kinesin family member 26B [Source:HGNC Symbol;Acc:HGNC:25484] [ENST00000479506]                                                                     |
| A_33_P3382565  | 0,001647349 | down | -2,0453825 | KIF26B    | Homo sapiens kinesin family member 26B (KIF26B), mRNA [NM_018012]                                                                                   |
| A_23_P218025   | 0,029503416 | down | -1,6846617 | KIF5A     | Homo sapiens kinesin family member 5A (KIF5A), mRNA [NM_004984]                                                                                     |
| A_24_P93948    | 0,004013184 | up   | 1,9720426  | KIF5A     | kinesin family member 5A [Source:HGNC Symbol;Acc:HGNC:6323] [ENST00000455537]                                                                       |
| A_24_P225878   | 0,048428725 | up   | 2,017116   | KIF9      | Homo sapiens kinesin family member 9 (KIF9), transcript variant 1, mRNA [NM_022342]                                                                 |
| A_24_P350622   | 0,007968188 | down | -2,1430786 | KIR2DL4   | Homo sapiens killer cell immunoglobulin-like receptor, two domains, long cytoplasmic tail, 4 (KIR2DL4), transcript variant 1, mRNA [NM_002255]      |
| A_23_P502590   | 0,011922343 | down | -2,290757  | KIR2DS4   | Homo sapiens killer cell immunoglobulin-like receptor, two domains, short cytoplasmic tail, 4 (KIR2DS4), transcript variant 1, mRNA [NM_012314]     |
| A_24_P117147   | 1,25E-06    | down | -4,5118985 | KIR3DL1   | Homo sapiens killer cell immunoglobulin-like receptor, three domains, long cytoplasmic tail, 1 (KIR3DL1), mRNA [NM_013289]                          |
| A_33_P3233010  | 8,38E-06    | down | -2,2276783 | KIR3DL2   | Homo sapiens killer cell immunoglobulin-like receptor, three domains, long cytoplasmic tail, 2 (KIR3DL2), transcript variant 2, mRNA [NM_001242867] |
| A_23_P370574   | 0,02456653  | down | -2,3750045 | KIR3DL3   | Homo sapiens killer cell immunoglobulin-like receptor, three domains, long cytoplasmic tail, 3 (KIR3DL3), mRNA [NM_153443]                          |

|                |             |      |            |           |                                                                                                                                      |
|----------------|-------------|------|------------|-----------|--------------------------------------------------------------------------------------------------------------------------------------|
| A_33_P3340926  | 0,022898423 | down | -1,6445712 | KIR3DX1   | Homo sapiens killer cell immunoglobulin-like receptor, three domains, X1 (KIR3DX1), transcript variant 1, non-coding RNA [NR_026716] |
| A_23_P124892   | 0,01763964  | down | -1,9058623 | KISS1     | Homo sapiens KiSS-1 metastasis-suppressor (KISS1), mRNA [NM_002256]                                                                  |
| A_24_P133253   | 0,017830791 | down | -2,431596  | KITLG     | Homo sapiens KIT ligand (KITLG), transcript variant b, mRNA [NM_000899]                                                              |
| A_23_P503064   | 0,038456183 | up   | 1,6591477  | KL        | Homo sapiens klotho (KL), mRNA [NM_004795]                                                                                           |
| A_24_P227211   | 0,001971516 | down | -1,7002665 | KLC2      | Homo sapiens kinesin light chain 2 (KLC2), transcript variant 1, mRNA [NM_022822]                                                    |
| A_33_P3288805  | 0,008660758 | down | -1,6146739 | KLC2      | Homo sapiens kinesin light chain 2 (KLC2), transcript variant 2, mRNA [NM_001134774]                                                 |
| A_33_P3410925  | 4,26E-04    | down | -2,221677  | KLF1      | Homo sapiens Kruppel-like factor 1 (erythroid) (KLF1), mRNA [NM_006563]                                                              |
| A_23_P168828   | 0,011095034 | up   | 1,8240104  | KLF10     | Homo sapiens Kruppel-like factor 10 (KLF10), transcript variant 1, mRNA [NM_005655]                                                  |
| A_23_P44505    | 0,0092587   | up   | 1,9485897  | KLF11     | Homo sapiens Kruppel-like factor 11 (KLF11), transcript variant 1, mRNA [NM_003597]                                                  |
| A_19_P00321061 | 0,007539997 | up   | 2,6221404  | KLF13     | Kruppel-like factor 13 [Source:HGNC Symbol;Acc:HGNC:13672] [ENST00000500533]                                                         |
| A_23_P30163    | 0,00698861  | up   | 2,1173794  | KLF3-AS1  | Homo sapiens KLF3 antisense RNA 1 (KLF3-AS1), long non-coding RNA [NR_026804]                                                        |
| A_23_P53891    | 0,030135188 | up   | 1,6753246  | KLF5      | Homo sapiens Kruppel-like factor 5 (intestinal) (KLF5), transcript variant 1, mRNA [NM_001730]                                       |
| A_23_P63798    | 0,002779183 | up   | 2,418726   | KLF6      | Homo sapiens Kruppel-like factor 6 (KLF6), transcript variant A, mRNA [NM_001300]                                                    |
| A_23_P415401   | 4,71E-05    | up   | 2,4729486  | KLF9      | Homo sapiens Kruppel-like factor 9 (KLF9), mRNA [NM_001206]                                                                          |
| A_24_P343255   | 0,010856547 | up   | 1,535066   | KLHDC3    | Homo sapiens kelch domain containing 3 (KLHDC3), transcript variant 1, mRNA [NM_057161]                                              |
| A_33_P3417765  | 0,006523673 | down | -2,2455633 | KLHDC7A   | Homo sapiens kelch domain containing 7A (KLHDC7A), mRNA [NM_152375]                                                                  |
| A_24_P242609   | 0,004774055 | up   | 1,5175129  | KLHL12    | Homo sapiens kelch-like family member 12 (KLHL12), transcript variant 2, mRNA [NM_021633]                                            |
| A_23_P159974   | 2,76E-04    | down | -2,1351867 | KLHL13    | Homo sapiens kelch-like family member 13 (KLHL13), transcript variant 1, mRNA [NM_033495]                                            |
| A_23_P72503    | 0,042915124 | up   | 1,8162782  | KLHL2     | Homo sapiens kelch-like family member 2 (KLHL2), transcript variant 1, mRNA [NM_007246]                                              |
| A_23_P341223   | 4,62E-04    | up   | 1,7054403  | KLHL21    | Homo sapiens kelch-like family member 21 (KLHL21), mRNA [NM_014851]                                                                  |
| A_24_P521994   | 0,00211257  | up   | 1,8394332  | KLHL24    | Homo sapiens kelch-like family member 24 (KLHL24), mRNA [NM_017644]                                                                  |
| A_33_P3399618  | 0,04681998  | down | -1,5641695 | KLHL33    | Homo sapiens kelch-like family member 33 (KLHL33), mRNA [NM_001109997]                                                               |
| A_24_P645765   | 9,31E-05    | up   | 1,737309   | KLHL42    | Homo sapiens kelch-like family member 42 (KLHL42), mRNA [NM_020782]                                                                  |
| A_24_P944253   | 0,018423297 | down | -2,3165352 | KLHL6     | Homo sapiens kelch-like family member 6 (KLHL6), mRNA [NM_130446]                                                                    |
| A_23_P324994   | 0,001881584 | up   | 1,5058286  | KLHL7     | Homo sapiens kelch-like family member 7 (KLHL7), transcript variant 2, mRNA [NM_018846]                                              |
| A_33_P3251065  | 0,027889302 | up   | 1,6546538  | KLK13     | kallikrein-related peptidase 13 [Source:HGNC Symbol;Acc:HGNC:6361] [ENST00000602090]                                                 |
| A_33_P3417640  | 0,018454894 | up   | 3,137429   | KLK14     | Homo sapiens kallikrein-related peptidase 14 (KLK14), mRNA [NM_022046]                                                               |
| A_23_P310257   | 2,88E-04    | down | -2,764699  | KLK2      | Homo sapiens kallikrein-related peptidase 2 (KLK2), transcript variant 2, mRNA [NM_001002231]                                        |
| A_33_P3215843  | 0,001132771 | up   | 1,8901061  | KLK3      | Homo sapiens kallikrein-related peptidase 3 (KLK3), transcript variant 3, mRNA [NM_001030047]                                        |
| A_24_P376047   | 0,021676516 | down | -1,970522  | KLK4      | Homo sapiens kallikrein-related peptidase 4 (KLK4), transcript variant 1, mRNA [NM_004917]                                           |
| A_24_P236935   | 0,023031501 | up   | 2,1099305  | KLK6      | Homo sapiens kallikrein-related peptidase 6 (KLK6), transcript variant B, mRNA [NM_001012964]                                        |
| A_21_P0007870  | 3,60E-04    | down | -1,8859109 | KLRAP1    | Homo sapiens killer cell lectin-like receptor subfamily A pseudogene 1 (KLRAP1), non-coding RNA [NR_028045]                          |
| A_23_P99275    | 0,032236006 | up   | 1,6653702  | KLRB1     | Homo sapiens killer cell lectin-like receptor subfamily B, member 1 (KLRB1), mRNA [NM_002258]                                        |
| A_23_P139654   | 0,003491028 | down | -2,4679215 | KLRC1     | Homo sapiens killer cell lectin-like receptor subfamily C, member 1 (KLRC1), transcript variant 2, mRNA [NM_007328]                  |
| A_23_P128281   | 1,42E-04    | up   | 3,0703955  | KLRC3     | Homo sapiens killer cell lectin-like receptor subfamily C, member 3 (KLRC3), transcript variant 2, mRNA [NM_007333]                  |
| A_23_P218058   | 0,001312448 | down | -2,3314788 | KLRC4     | Homo sapiens killer cell lectin-like receptor subfamily C, member 4 (KLRC4), mRNA [NM_013431]                                        |
| A_23_P64898    | 0,004674304 | down | -2,2530773 | KLRG1     | Homo sapiens killer cell lectin-like receptor subfamily G, member 1 (KLRG1), mRNA [NM_005810]                                        |
| A_33_P3306207  | 0,001092403 | down | -1,993609  | KLRG2     | Homo sapiens killer cell lectin-like receptor subfamily G, member 2 (KLRG2), mRNA [NM_198508]                                        |
| A_23_P200838   | 2,40E-05    | down | -2,4878786 | KMO       | Homo sapiens kynurenine 3-monooxygenase (kynurenine 3-hydroxylase) (KMO), mRNA [NM_003679]                                           |
| A_24_P77082    | 1,04E-04    | down | -4,0521417 | KMO       | Homo sapiens kynurenine 3-monooxygenase (kynurenine 3-hydroxylase) (KMO), mRNA [NM_003679]                                           |
| A_33_P3307307  | 0,005004669 | up   | 1,6311291  | KMT2A     | Homo sapiens lysine (K)-specific methyltransferase 2A (KMT2A), transcript variant 1, mRNA [NM_001197104]                             |
| A_23_P142421   | 0,00408004  | up   | 1,5771136  | KMT2B     | Homo sapiens lysine (K)-specific methyltransferase 2B (KMT2B), mRNA [NM_014727]                                                      |
| A_33_P3340254  | 0,005059445 | up   | 1,608228   | KMT2D     | Homo sapiens lysine (K)-specific methyltransferase 2D (KMT2D), mRNA [NM_003482]                                                      |
| A_33_P3277407  | 0,008625941 | down | -1,6158193 | KMT2E     | Homo sapiens lysine (K)-specific methyltransferase 2E (KMT2E), transcript variant 1, mRNA [NM_182931]                                |
| A_33_P3275435  | 0,007296328 | down | -1,5644714 | KMT2E-AS1 | Homo sapiens KMT2E antisense RNA 1 (head to head) (KMT2E-AS1), long non-coding RNA [NR_024586]                                       |
| A_33_P3401262  | 0,043342073 | down | -1,6312026 | KNCN      | Homo sapiens kinocilin (KNCN), mRNA [NM_001097611]                                                                                   |
| A_23_P136817   | 0,028807037 | up   | 1,5946918  | KNTC1     | Homo sapiens kinetochore associated 1 (KNTC1), mRNA [NM_014708]                                                                      |
| A_23_P156443   | 0,03007271  | down | -2,0611014 | KPNA5     | Homo sapiens karyopherin alpha 5 (importin alpha 6) (KPNA5), mRNA [NM_002269]                                                        |
| A_21_P0011637  | 0,023166556 | up   | 1,8288679  | KRT16P3   | Homo sapiens keratin 16 pseudogene 3 (KRT16P3), non-coding RNA [NR_029393]                                                           |
| A_33_P3398618  | 0,008033396 | down | -2,4820197 | KRT17P5   | Homo sapiens keratin 17 pseudogene 5 (KRT17P5), non-coding RNA [NR_001443]                                                           |
| A_33_P3221898  | 0,00906708  | down | -1,9525985 | KRT17P5   | Homo sapiens keratin 17 pseudogene 5 (KRT17P5), non-coding RNA [NR_001443]                                                           |
| A_32_P489662   | 0,031928908 | down | -1,55269   | KRT28     | Homo sapiens keratin 28, type I (KRT28), mRNA [NM_181535]                                                                            |
| A_33_P3341490  | 0,045643225 | down | -1,6641976 | KRT42P    | Homo sapiens keratin 42 pseudogene (KRT42P), non-coding RNA [NR_033415]                                                              |
| A_33_P3249274  | 0,007293653 | up   | 1,8417765  | KRT73-AS1 | Homo sapiens KRT73 antisense RNA 1 (KRT73-AS1), long non-coding RNA [NR_126005]                                                      |
| A_33_P3315284  | 0,001877142 | down | -1,7517412 | KRT74     | Homo sapiens keratin 74, type II (KRT74), mRNA [NM_175053]                                                                           |
| A_24_P142495   | 0,027835682 | down | -1,7227523 | KRTAP1-3  | Homo sapiens keratin associated protein 1-3 (KRTAP1-3), mRNA [NM_030966]                                                             |
| A_33_P3254579  | 0,03133491  | down | -2,3173804 | KRTAP1-5  | Homo sapiens keratin associated protein 1-5 (KRTAP1-5), mRNA [NM_031957]                                                             |
| A_33_P3293785  | 0,003217299 | down | -1,6902558 | KRTAP10-3 | Homo sapiens keratin associated protein 10-3 (KRTAP10-3), mRNA [NM_198696]                                                           |
| A_33_P3334877  | 0,002084116 | down | -3,317111  | KRTAP10-4 | Homo sapiens keratin associated protein 10-4 (KRTAP10-4), mRNA [NM_198687]                                                           |
| A_33_P3256272  | 2,14E-04    | down | -3,9907413 | KRTAP10-5 | Homo sapiens keratin associated protein 10-5 (KRTAP10-5), mRNA [NM_198694]                                                           |
| A_24_P66312    | 4,27E-04    | down | -3,0264258 | KRTAP12-1 | Homo sapiens keratin associated protein 12-1 (KRTAP12-1), mRNA [NM_181686]                                                           |

|                |             |      |            |           |                                                                                                                       |
|----------------|-------------|------|------------|-----------|-----------------------------------------------------------------------------------------------------------------------|
| A_33_P3354404  | 0,026921423 | down | -1,5019562 | KRTAP12-2 | Homo sapiens keratin associated protein 12-2 (KRTAP12-2), mRNA [NM_181684]                                            |
| A_24_P314534   | 0,006242979 | down | -2,003012  | KRTAP13-2 | Homo sapiens keratin associated protein 13-2 (KRTAP13-2), mRNA [NM_181621]                                            |
| A_24_P246107   | 0,011898583 | down | -2,3112679 | KRTAP13-4 | Homo sapiens keratin associated protein 13-4 (KRTAP13-4), mRNA [NM_181600]                                            |
| A_33_P3340666  | 0,002101731 | down | -2,1085093 | KRTAP19-5 | Homo sapiens keratin associated protein 19-5 (KRTAP19-5), mRNA [NM_181611]                                            |
| A_24_P76854    | 9,40E-04    | down | -2,5346448 | KRTAP2-1  | Homo sapiens keratin associated protein 2-1 (KRTAP2-1), mRNA [NM_001123387]                                           |
| A_23_P153022   | 0,018012684 | down | -1,896541  | KRTAP2-4  | Homo sapiens keratin associated protein 2-4 (KRTAP2-4), mRNA [NM_033184]                                              |
| A_33_P3247473  | 0,041269552 | down | -2,176554  | KRTAP23-1 | Homo sapiens keratin associated protein 23-1 (KRTAP23-1), mRNA [NM_181624]                                            |
| A_33_P3306619  | 0,020986319 | down | -1,6541213 | KRTAP25-1 | Homo sapiens keratin associated protein 25-1 (KRTAP25-1), mRNA [NM_001128598]                                         |
| A_33_P3382399  | 0,03041392  | down | -1,6884477 | KRTAP3-1  | Homo sapiens keratin associated protein 3-1 (KRTAP3-1), mRNA [NM_031958]                                              |
| A_23_P107454   | 0,003035267 | down | -1,8454458 | KRTAP3-1  | Homo sapiens keratin associated protein 3-1 (KRTAP3-1), mRNA [NM_031958]                                              |
| A_33_P3411315  | 0,002207418 | down | -2,6068997 | KRTAP3-3  | Homo sapiens keratin associated protein 3-3 (KRTAP3-3), mRNA [NM_033185]                                              |
| A_33_P3245348  | 0,006456472 | down | -1,9707732 | KRTAP4-1  | Homo sapiens keratin associated protein 4-1 (KRTAP4-1), mRNA [NM_033060]                                              |
| A_23_P4400     | 0,013716091 | down | -2,6203098 | KRTAP4-11 | Homo sapiens keratin associated protein 4-11 (KRTAP4-11), mRNA [NM_033059]                                            |
| A_23_P27197    | 0,007224562 | down | -2,0422816 | KRTAP4-5  | Homo sapiens keratin associated protein 4-5 (KRTAP4-5), mRNA [NM_033188]                                              |
| A_33_P3256257  | 0,025008855 | down | -2,2223895 | KRTAP4-7  | Homo sapiens keratin associated protein 4-7 (KRTAP4-7), mRNA [NM_033061]                                              |
| A_33_P3317752  | 5,47E-04    | down | -2,6964154 | KRTAP4-7  | Homo sapiens keratin associated protein 4-7 (KRTAP4-7), mRNA [NM_033061]                                              |
| A_33_P3209615  | 0,020038685 | down | -1,8541687 | KRTAP4-8  | Homo sapiens keratin associated protein 4-8 (KRTAP4-8), mRNA [NM_031960]                                              |
| A_33_P3304691  | 0,01030086  | down | -2,1921768 | KRTAP5-1  | Homo sapiens keratin associated protein 5-1 (KRTAP5-1), mRNA [NM_001005922]                                           |
| A_33_P3363310  | 0,004814841 | down | -1,712829  | KRTAP5-10 | keratin associated protein 5-10 [Source:HGNC Symbol;Acc:HGNC:23605] [ENST00000376536]                                 |
| A_33_P3229472  | 0,029148912 | down | -2,0889318 | KRTAP5-10 | Homo sapiens keratin associated protein 5-10 (KRTAP5-10), mRNA [NM_001012710]                                         |
| A_33_P3372742  | 0,013315971 | down | -1,5124658 | KRTAP5-11 | keratin associated protein 5-11 [Source:HGNC Symbol;Acc:HGNC:23606] [ENST00000617152]                                 |
| A_33_P3317317  | 0,001959605 | down | -2,0561798 | KRTAP5-4  | Homo sapiens keratin associated protein 5-4 (KRTAP5-4), mRNA [NM_001012709]                                           |
| A_33_P3304576  | 0,029869568 | down | -1,8333087 | KRTAP5-5  | Homo sapiens keratin associated protein 5-5 (KRTAP5-5), mRNA [NM_001001480]                                           |
| A_33_P3228709  | 2,96E-04    | down | -2,5869048 | KRTAP5-7  | Homo sapiens keratin associated protein 5-7 (KRTAP5-7), mRNA [NM_001012503]                                           |
| A_33_P3263664  | 0,010709509 | down | -2,2726455 | KRTAP6-2  | Homo sapiens keratin associated protein 6-2 (KRTAP6-2), mRNA [NM_181604]                                              |
| A_33_P3352340  | 0,03306264  | down | -1,9157394 | KRTAP9-1  | Homo sapiens keratin associated protein 9-1 (KRTAP9-1), mRNA [NM_001190460]                                           |
| A_33_P3406806  | 1,76E-04    | down | -3,4069166 | KRTAP9-1  | Homo sapiens keratin associated protein 9-1 (KRTAP9-1), mRNA [NM_001190460]                                           |
| A_33_P3358908  | 6,45E-04    | down | -1,9955626 | KRTAP9-6  | Homo sapiens keratin associated protein 9-6 (KRTAP9-6), mRNA [NM_001277331]                                           |
| A_33_P3404123  | 0,01403093  | down | -2,0465748 | KRTAP9-7  | Homo sapiens keratin associated protein 9-7 (KRTAP9-7), mRNA [NM_001277332]                                           |
| A_33_P3307457  | 0,01141333  | up   | 1,6556492  | KRTAP9-8  | Homo sapiens keratin associated protein 9-8 (KRTAP9-8), mRNA [NM_031963]                                              |
| A_23_P433132   | 0,005324503 | up   | 1,5113947  | KRTCAP3   | Homo sapiens keratinocyte associated protein 3 (KRTCAP3), transcript variant 2, mRNA [NM_173853]                      |
| A_23_P207774   | 0,040963635 | up   | 2,0151267  | KSR1      | Homo sapiens kinase suppressor of ras 1 (KSR1), mRNA [NM_014238]                                                      |
| A_33_P3267195  | 0,00120319  | down | -1,6540695 | KU-MEL-3  | Homo sapiens uncharacterized LOC497048 (KU-MEL-3), long non-coding RNA [NR_122107]                                    |
| A_19_P00316107 | 0,027886016 | up   | 1,6285424  | L3MBTL1   | Homo sapiens mRNA for KIAA0681 protein, partial cds. [AB014581]                                                       |
| A_23_P311885   | 0,005044981 | up   | 1,6372061  | L3MBTL3   | Homo sapiens l(3)mbt-like 3 (Drosophila) (L3MBTL3), transcript variant 1, mRNA [NM_032438]                            |
| A_23_P374322   | 5,62E-05    | down | -2,3650563 | LACC1     | Homo sapiens laccase (multicopper oxidoreductase) domain containing 1 (LACC1), transcript variant 2, mRNA [NM_153218] |
| A_33_P3347482  | 0,014284395 | down | -1,5816962 | LACTBL1   | Homo sapiens lactamase, beta-like 1 (LACTBL1), mRNA [NM_001289974]                                                    |
| A_33_P3355230  | 5,85E-04    | down | -4,6951303 | LAIR1     | Homo sapiens leukocyte-associated immunoglobulin-like receptor 1 (LAIR1), transcript variant a, mRNA [NM_002287]      |
| A_33_P3391596  | 7,24E-04    | down | -2,8605895 | LAMA4     | Homo sapiens laminin, alpha 4 (LAMA4), transcript variant 1, mRNA [NM_001105206]                                      |
| A_23_P334328   | 0,002092414 | up   | 2,2642705  | LAMB4     | Homo sapiens laminin, beta 4 (LAMB4), mRNA [NM_007356]                                                                |
| A_33_P3338413  | 0,03535476  | up   | 2,676047   | LAMB4     | Homo sapiens laminin, beta 4 (LAMB4), mRNA [NM_007356]                                                                |
| A_23_P82979    | 0,010396963 | down | -2,8568778 | LAMC3     | Homo sapiens laminin, gamma 3 (LAMC3), mRNA [NM_006059]                                                               |
| A_33_P3238007  | 0,013150224 | down | -1,5923891 | LARP1B    | Homo sapiens La ribonucleoprotein domain family, member 1B (LARP1B), transcript variant 2, mRNA [NM_178043]           |
| A_23_P117782   | 0,04579296  | down | -1,5046333 | LARP6     | Homo sapiens La ribonucleoprotein domain family, member 6 (LARP6), transcript variant 1, mRNA [NM_018357]             |
| A_33_P3237977  | 0,00461089  | down | -1,7431139 | LARP6     | Homo sapiens La ribonucleoprotein domain family, member 6 (LARP6), transcript variant 2, mRNA [NM_197958]             |
| A_24_P70002    | 4,06E-04    | up   | 1,9345651  | LATS2     | Homo sapiens large tumor suppressor kinase 2 (LATS2), mRNA [NM_014572]                                                |
| A_23_P127565   | 0,013901345 | up   | 1,6796892  | LAYN      | Homo sapiens layilin (LAYN), transcript variant 2, mRNA [NM_178834]                                                   |
| A_23_P120227   | 0,005677398 | up   | 2,5130944  | LBH       | Homo sapiens limb bud and heart development (LBH), mRNA [NM_030915]                                                   |
| A_23_P86493    | 0,002892892 | down | -2,0821714 | LBX1      | Homo sapiens ladybird homeobox 1 (LBX1), mRNA [NM_006562]                                                             |
| A_33_P3392517  | 0,015042769 | down | -1,8043176 | LBX2      | Homo sapiens ladybird homeobox 2 (LBX2), transcript variant 2, mRNA [NM_001009812]                                    |
| A_23_P319640   | 0,009354573 | down | -1,594739  | LBX2-AS1  | Homo sapiens LBX2 antisense RNA 1 (LBX2-AS1), long non-coding RNA [NR_024606]                                         |
| A_33_P3356821  | 0,018369041 | down | -1,971476  | LCE1C     | Homo sapiens late cornified envelope 1C (LCE1C), transcript variant 1, mRNA [NM_178351]                               |
| A_23_P375524   | 3,18E-04    | down | -2,7382565 | LCE1D     | Homo sapiens late cornified envelope 1D (LCE1D), mRNA [NM_178352]                                                     |
| A_33_P3302125  | 0,04598352  | down | -1,936221  | LCE2A     | Homo sapiens late cornified envelope 2A (LCE2A), mRNA [NM_178428]                                                     |
| A_33_P3365072  | 4,77E-04    | down | -4,2183623 | LCE6A     | Homo sapiens late cornified envelope 6A (LCE6A), mRNA [NM_001128600]                                                  |
| A_23_P103361   | 6,61E-05    | down | -2,857248  | LCK       | Homo sapiens LCK proto-oncogene, Src family tyrosine kinase (LCK), transcript variant 2, mRNA [NM_005356]             |
| A_33_P3248539  | 0,015191632 | down | -1,7442003 | LCN1      | Homo sapiens lipocalin 1 (LCN1), transcript variant 2, mRNA [NM_001252617]                                            |
| A_33_P3263955  | 0,01092718  | up   | 1,7500861  | LCN10     | Homo sapiens lipocalin 10 (LCN10), mRNA [NM_001001712]                                                                |
| A_23_P32115    | 5,30E-04    | down | -2,6447988 | LCN12     | Homo sapiens lipocalin 12 (LCN12), mRNA [NM_178536]                                                                   |
| A_33_P3263938  | 0,005069436 | down | -2,3223047 | LCN15     | Homo sapiens lipocalin 15 (LCN15), mRNA [NM_203347]                                                                   |
| A_33_P3390557  | 0,005539991 | down | -2,3481658 | LCNL1     | Homo sapiens lipocalin-like 1 (LCNL1), mRNA [NM_207510]                                                               |

|                |                  |                            |                                                                                                                                              |
|----------------|------------------|----------------------------|----------------------------------------------------------------------------------------------------------------------------------------------|
| A_23_P328836   | 0,003371461 up   | 1,5761234 LCOR             | Homo sapiens ligand dependent nuclear receptor corepressor (LCOR), transcript variant 1, mRNA [NM_032440]                                    |
| A_23_P30547    | 0,008231903 up   | 1,5660498 LCP2             | Homo sapiens lymphocyte cytosolic protein 2 (SH2 domain containing leukocyte protein of 76kDa) (LCP2), mRNA [NM_005565]                      |
| A_32_P98227    | 0,002758769 down | -2,713767 LDB3             | Homo sapiens LIM domain binding 3 (LDB3), transcript variant 5, mRNA [NM_001171610]                                                          |
| A_32_P44568    | 0,002949719 up   | 1,9103214 LDHA             | Homo sapiens lactate dehydrogenase A (LDHA), transcript variant 1, mRNA [NM_005566]                                                          |
| A_33_P3236441  | 8,47E-04 down    | -2,6096644 LDHAL6A         | Homo sapiens lactate dehydrogenase A-like 6A (LDHAL6A), transcript variant 1, mRNA [NM_144972]                                               |
| A_23_P53039    | 7,35E-06 down    | -3,9985337 LDHC            | Homo sapiens lactate dehydrogenase C (LDHC), transcript variant 1, mRNA [NM_002301]                                                          |
| A_21_P0000886  | 0,008492159 down | -2,2101512 LDLRAD4-AS1     | Homo sapiens LDLRAD4 antisense RNA 1 (LDLRAD4-AS1), long non-coding RNA [NR_040031]                                                          |
| A_23_P25587    | 0,013101074 down | -1,585457 LECT1            | Homo sapiens leukocyte cell derived chemotaxin 1 (LECT1), transcript variant 1, mRNA [NM_007015]                                             |
| A_23_P137573   | 0,031823214 up   | 1,5584595 LEFTY2           | Homo sapiens left-right determination factor 2 (LEFTY2), transcript variant 1, mRNA [NM_003240]                                              |
| A_24_P397817   | 0,032652948 up   | 2,0830197 LEP              | Homo sapiens leptin (LEP), mRNA [NM_000230]                                                                                                  |
| A_24_P231104   | 0,01611238 up    | 1,543655 LEPR              | Homo sapiens leptin receptor (LEPR), transcript variant 3, mRNA [NM_001003679]                                                               |
| A_33_P3339820  | 0,001513058 up   | 1,524049 LEPR              | Homo sapiens leptin receptor (LEPR), transcript variant 2, mRNA [NM_001003680]                                                               |
| A_24_P148094   | 8,73E-04 up      | 1,8079225 LEPROT           | Homo sapiens leptin receptor overlapping transcript (LEPROT), transcript variant 1, mRNA [NM_017526]                                         |
| A_23_P434518   | 5,19E-04 down    | -2,062575 LFN3             | Homo sapiens LFN3 O-fucosylpeptide 3-beta-N-acetylglucosaminyltransferase (LFN3), transcript variant 2, mRNA [NM_001040168]                  |
| A_23_P120902   | 0,049549673 up   | 2,075476 LGALS2            | Homo sapiens lectin, galactoside-binding, soluble, 2 (LGALS2), mRNA [NM_006498]                                                              |
| A_23_P15357    | 9,32E-04 down    | -1,6210023 LGALS3BP        | Homo sapiens lectin, galactoside-binding, soluble, 3 binding protein (LGALS3BP), mRNA [NM_005567]                                            |
| A_23_P127267   | 0,009676578 up   | 1,5536923 LGI1             | Homo sapiens leucine-rich, glioma inactivated 1 (LGI1), mRNA [NM_005097]                                                                     |
| A_24_P310256   | 0,00538868 up    | 1,6410364 LGI4             | Homo sapiens leucine-rich repeat LGI family, member 4 (LGI4), mRNA [NM_139284]                                                               |
| A_33_P3266769  | 0,03548057 up    | 1,6033709 LHCGR            | luteinizing hormone/choriogonadotropin receptor [Source:HGNC Symbol;Acc:HGNC:6585] [ENST00000477576]                                         |
| A_23_P255104   | 0,010824876 up   | 1,6277791 LHFPL2           | Homo sapiens lipoma HMGIC fusion partner-like 2 (LHFPL2), mRNA [NM_005779]                                                                   |
| A_32_P158083   | 4,69E-06 down    | -10,581505 LHFPL3          | Homo sapiens lipoma HMGIC fusion partner-like 3 (LHFPL3), mRNA [NM_199000]                                                                   |
| A_32_P394491   | 0,021738604 up   | 2,4792063 LHFPL3-AS1       | Homo sapiens LHFPL3 antisense RNA 1 (LHFPL3-AS1), transcript variant 2, long non-coding RNA [NR_034141]                                      |
| A_33_P3692756  | 0,03698587 down  | -1,5285515 LHFPL3-AS2      | Homo sapiens LHFPL3 antisense RNA 2 (LHFPL3-AS2), long non-coding RNA [NR_027374]                                                            |
| A_33_P3409854  | 6,32E-05 down    | -3,0190783 LHX1            | Homo sapiens LIM homeobox 1 (LHX1), mRNA [NM_005568]                                                                                         |
| A_33_P3223678  | 0,007198805 down | -3,3527548 LHX3            | Homo sapiens LIM homeobox 3 (LHX3), transcript variant 2, mRNA [NM_014564]                                                                   |
| A_23_P23869    | 0,023427997 up   | 1,5366815 LHX4             | Homo sapiens LIM homeobox 4 (LHX4), mRNA [NM_033343]                                                                                         |
| A_23_P47967    | 0,00821214 up    | 1,9770395 LHX5             | Homo sapiens LIM homeobox 5 (LHX5), mRNA [NM_022363]                                                                                         |
| A_24_P415845   | 0,024534483 down | -1,9664092 LIG4            | Homo sapiens ligase IV, DNA, ATP-dependent (LIG4), transcript variant 1, mRNA [NM_002312]                                                    |
| A_24_P348989   | 0,02411375 down  | -1,7900414 LILRA1          | Homo sapiens leukocyte immunoglobulin-like receptor, subfamily A (with TM domain), member 1 (LILRA1), transcript variant 1, mRNA [NM_006863] |
| A_23_P90497    | 0,013204076 down | -2,2014155 LILRA4          | Homo sapiens leukocyte immunoglobulin-like receptor, subfamily A (with TM domain), member 4 (LILRA4), mRNA [NM_012276]                       |
| A_23_P215461   | 0,004292857 up   | 2,013782 LIMK1             | Homo sapiens LIM domain kinase 1 (LIMK1), transcript variant 1, mRNA [NM_002314]                                                             |
| A_33_P3220615  | 0,02750677 down  | -1,6926328 LIN28B          | Homo sapiens lin-28 homolog B (C. elegans) (LIN28B), mRNA [NM_001004317]                                                                     |
| A_23_P99253    | 0,013196187 up   | 1,721298 LIN7A             | Homo sapiens lin-7 homolog A (C. elegans) (LIN7A), mRNA [NM_004664]                                                                          |
| A_23_P301995   | 0,009299332 down | -1,7733628 LIN9            | Homo sapiens lin-9 DREAM MuvB core complex component (LIN9), transcript variant 1, mRNA [NM_173083]                                          |
| A_33_P3399228  | 0,009695206 up   | 1,9365015 LINGO1           | Homo sapiens leucine rich repeat and Ig domain containing 1 (LINGO1), transcript variant 5, mRNA [NM_001301191]                              |
| A_23_P47019    | 0,00143648 up    | 1,6181887 LIPF             | Homo sapiens lipase, gastric (LIPF), transcript variant 2, mRNA [NM_004190]                                                                  |
| A_33_P3401422  | 0,008592036 down | -2,7452915 LIPM            | Homo sapiens lipase, family member M (LIPM), mRNA [NM_001128215]                                                                             |
| A_33_P3323939  | 2,72E-05 down    | -9,259584 LIPN             | Homo sapiens lipase, family member N (LIPN), mRNA [NM_001102469]                                                                             |
| A_23_P3532     | 0,003011246 up   | 1,8339392 LITAF            | Homo sapiens lipopolysaccharide-induced TNF factor (LITAF), transcript variant 1, mRNA [NM_004862]                                           |
| A_32_P116606   | 0,003818828 up   | 1,5201497 LIX1             | Homo sapiens Lix1 homolog (chicken) (LIX1), mRNA [NM_153234]                                                                                 |
| A_33_P3387756  | 2,78E-04 down    | -2,6778126 LKAAEAR1        | Homo sapiens LKAAEAR motif containing 1 (LKAAEAR1), mRNA [NM_001007125]                                                                      |
| A_33_P3337131  | 0,003904029 down | -1,6552787 LL22NC03-63E9.3 | Homo sapiens uncharacterized LOC648691 (LL22NC03-63E9.3), long non-coding RNA [NR_027426]                                                    |
| A_33_P3337124  | 0,001019795 down | -4,4124637 LL22NC03-63E9.3 | Homo sapiens uncharacterized LOC648691 (LL22NC03-63E9.3), long non-coding RNA [NR_027426]                                                    |
| A_23_P140630   | 0,01173853 down  | -1,6752245 LMAN1L          | Homo sapiens lectin, mannose-binding, 1 like (LMAN1L), mRNA [NM_021819]                                                                      |
| A_23_P150931   | 0,012808262 up   | 1,5421113 LMBR1L           | Homo sapiens limb development membrane protein 1-like (LMBR1L), transcript variant 1, mRNA [NM_018113]                                       |
| A_23_P6771     | 0,003662108 down | -2,2806568 LMCD1           | Homo sapiens LIM and cysteine-rich domains 1 (LMCD1), transcript variant 1, mRNA [NM_014583]                                                 |
| A_19_P00808088 | 0,005403922 down | -2,3141427 LMCD1-AS1       | Homo sapiens LMCD1 antisense RNA 1 (head to head) (LMCD1-AS1), long non-coding RNA [NR_033378]                                               |
| A_33_P3883985  | 0,02948677 up    | 2,2318318 LMF1             | Homo sapiens lipase maturation factor 1 (LMF1), transcript variant 4, non-coding RNA [NR_036442]                                             |
| A_23_P170959   | 0,001367361 down | -2,6275523 LMLN            | Homo sapiens leishmanolysin-like (metallopeptidase M8 family) (LMLN), transcript variant 2, mRNA [NM_033029]                                 |
| A_23_P87310    | 2,76E-06 down    | -4,842292 LMO1             | Homo sapiens LIM domain only 1 (rhombotin 1) (LMO1), transcript variant 1, mRNA [NM_002315]                                                  |
| A_33_P3280805  | 0,01143042 up    | 2,3695478 LMO7             | Homo sapiens LIM domain 7 (LMO7), transcript variant 2, mRNA [NM_015842]                                                                     |
| A_32_P795513   | 0,04081982 up    | 1,6023687 LMOD3            | leiomodlin 3 (fetal) [Source:HGNC Symbol;Acc:HGNC:6649] [ENST00000420581]                                                                    |
| A_33_P3266928  | 0,046466764 up   | 1,5932807 LMTK3            | Homo sapiens lemur tyrosine kinase 3 (LMTK3), mRNA [NM_001080434]                                                                            |
| A_33_P3215739  | 0,001677505 down | -2,3665833 LNP1            | Homo sapiens leukemia NUP98 fusion partner 1 (LNP1), mRNA [NM_001085451]                                                                     |
| A_23_P213137   | 0,033163324 up   | 2,526658 LNX1              | Homo sapiens ligand of numb-protein X 1, E3 ubiquitin protein ligase (LNX1), transcript variant 2, mRNA [NM_032622]                          |
| A_32_P198810   | 9,32E-04 down    | -1,9636338 LOH12CR2        | Homo sapiens loss of heterozygosity, 12, chromosomal region 2 (non-protein coding) (LOH12CR2), long non-coding RNA [NR_024061]               |
| A_23_P94216    | 0,003931487 up   | 1,6968296 LONRF1           | Homo sapiens LON peptidase N-terminal domain and ring finger 1 (LONRF1), mRNA [NM_152271]                                                    |
| A_33_P3315519  | 0,032252204 down | -1,7960142 LONRF2          | Homo sapiens LON peptidase N-terminal domain and ring finger 2 (LONRF2), mRNA [NM_198461]                                                    |
| A_23_P114414   | 0,00101968 down  | -2,0328484 LONRF3          | Homo sapiens LON peptidase N-terminal domain and ring finger 3 (LONRF3), transcript variant 1, mRNA [NM_001031855]                           |
| A_23_P386888   | 7,77E-04 down    | -2,3508594 LPA             | Homo sapiens lipoprotein, Lp(a) (LPA), mRNA [NM_005577]                                                                                      |
| A_21_P0013164  | 0,021936392 up   | 2,7585485 LPAL2            | Homo sapiens lipoprotein, Lp(a)-like 2, pseudogene (LPAL2), transcript variant 2, non-coding RNA [NR_028093]                                 |

|               |                  |                      |                                                                                                                                       |
|---------------|------------------|----------------------|---------------------------------------------------------------------------------------------------------------------------------------|
| A_24_P406006  | 4,13E-05 up      | 2,4378085 LPCAT1     | Homo sapiens lysophosphatidylcholine acyltransferase 1 (LPCAT1), mRNA [NM_024830]                                                     |
| A_23_P49009   | 7,72E-04 up      | 2,0237591 LPCAT4     | Homo sapiens lysophosphatidylcholine acyltransferase 4 (LPCAT4), mRNA [NM_153613]                                                     |
| A_33_P3356070 | 0,034210503 up   | 1,6612626 LPIN1      | Homo sapiens lipin 1 (LPIN1), transcript variant 3, mRNA [NM_001261428]                                                               |
| A_32_P52609   | 0,002807883 up   | 1,731044 LPIN1       | Homo sapiens lipin 1 (LPIN1), transcript variant 1, mRNA [NM_145693]                                                                  |
| A_23_P146233  | 0,047277145 up   | 2,1292322 LPL        | Homo sapiens lipoprotein lipase (LPL), mRNA [NM_000237]                                                                               |
| A_33_P3384958 | 0,015253551 down | -1,8476499 LPPR4     | Homo sapiens lipid phosphate phosphatase-related protein type 4 (LPPR4), transcript variant 1, mRNA [NM_014839]                       |
| A_24_P360078  | 0,00276564 up    | 1,633135 LRBA        | Homo sapiens LPS-responsive vesicle trafficking, beach and anchor containing (LRBA), transcript variant 2, mRNA [NM_006726]           |
| A_24_P170774  | 0,03429293 up    | 1,5892844 LRCH1      | Homo sapiens leucine-rich repeats and calponin homology (CH) domain containing 1 (LRCH1), transcript variant 2, mRNA [NM_015116]      |
| A_21_P0011105 | 0,01440034 up    | 2,291546 LRCOL1      | leucine rich colipase-like 1 [Source:HGNC Symbol;Acc:HGNC:44160] [ENST00000616042]                                                    |
| A_33_P3368925 | 0,04829474 down  | -1,5186015 LRFN3     | leucine rich repeat and fibronectin type III domain containing 3 [Source:HGNC Symbol;Acc:HGNC:28370] [ENST00000588831]                |
| A_33_P3280094 | 0,036396194 up   | 1,5753541 LRFN4      | Homo sapiens leucine rich repeat and fibronectin type III domain containing 4 (LRFN4), mRNA [NM_024036]                               |
| A_23_P163195  | 0,007201625 up   | 1,5282245 LRFN5      | Homo sapiens leucine rich repeat and fibronectin type III domain containing 5 (LRFN5), mRNA [NM_152447]                               |
| A_23_P16415   | 0,003698964 down | -1,7087084 LRP3      | Homo sapiens low density lipoprotein receptor-related protein 3 (LRP3), mRNA [NM_002333]                                              |
| A_24_P403561  | 0,00458768 up    | 1,7837663 LRP4       | Homo sapiens low density lipoprotein receptor-related protein 4 (LRP4), mRNA [NM_002334]                                              |
| A_21_P0003885 | 0,047736116 up   | 1,5249289 LRPAP1     | Homo sapiens low density lipoprotein receptor-related protein associated protein 1 (LRPAP1), transcript variant 1, mRNA [NM_002337]   |
| A_33_P3286208 | 0,025328742 down | -1,525203 LRR1       | Homo sapiens leucine rich repeat protein 1 (LRR1), transcript variant 3, mRNA [NM_203467]                                             |
| A_23_P19369   | 0,002109183 up   | 1,7184225 LRRC16A    | Homo sapiens leucine rich repeat containing 16A (LRRC16A), transcript variant 1, mRNA [NM_017640]                                     |
| A_23_P165136  | 1,51E-04 down    | -4,3166943 LRRC25    | Homo sapiens leucine rich repeat containing 25 (LRRC25), mRNA [NM_145256]                                                             |
| A_23_P49181   | 0,04385628 down  | 1,5634527 LRRC29     | Homo sapiens leucine rich repeat containing 29 (LRRC29), transcript variant 1, mRNA [NM_012163]                                       |
| A_33_P3325763 | 3,85E-04 down    | -2,3088548 LRRC3     | leucine rich repeat containing 3 [Source:HGNC Symbol;Acc:HGNC:14965] [ENST00000291592]                                                |
| A_21_P0010217 | 0,030037235 down | -2,1358535 LRRC3-AS1 | Homo sapiens LRRC3 antisense RNA 1 (head to head) (LRRC3-AS1), long non-coding RNA [NR_047476]                                        |
| A_24_P281036  | 0,002265659 up   | 1,7054558 LRRC31     | Homo sapiens leucine rich repeat containing 31 (LRRC31), transcript variant 1, mRNA [NM_024727]                                       |
| A_23_P41194   | 0,020677513 up   | 1,7861514 LRRC34     | Homo sapiens leucine rich repeat containing 34 (LRRC34), transcript variant 3, mRNA [NM_153353]                                       |
| A_33_P3335183 | 0,01658908 down  | -1,6600022 LRRC37A2  | Homo sapiens leucine rich repeat containing 37, member A2 (LRRC37A2), mRNA [NM_001006607]                                             |
| A_32_P28402   | 0,005212484 up   | 1,5398017 LRRC37BP1  | Homo sapiens leucine rich repeat containing 37B pseudogene 1 (LRRC37BP1), non-coding RNA [NR_015341]                                  |
| A_33_P3228739 | 3,88E-04 down    | -2,6524434 LRRC3C    | Homo sapiens leucine rich repeat containing 3C (LRRC3C), mRNA [NM_001195545]                                                          |
| A_33_P3263217 | 9,58E-04 up      | 1,8331597 LRRC4      | Homo sapiens leucine rich repeat containing 4 (LRRC4), mRNA [NM_022143]                                                               |
| A_23_P381461  | 8,78E-05 down    | -2,0442166 LRRC45    | leucine rich repeat containing 45 [Source:HGNC Symbol;Acc:HGNC:28302] [ENST00000306688]                                               |
| A_23_P129174  | 0,021765538 down | -1,7467071 LRRC49    | Homo sapiens leucine rich repeat containing 49 (LRRC49), transcript variant 2, mRNA [NM_017691]                                       |
| A_33_P3344399 | 0,038031247 down | -1,5649277 LRRC49    | Homo sapiens leucine rich repeat containing 49 (LRRC49), transcript variant 3, mRNA [NM_001199018]                                    |
| A_33_P3228862 | 0,034672726 down | -1,5541698 LRRC69    | Homo sapiens leucine rich repeat containing 69 (LRRC69), mRNA [NM_001129890]                                                          |
| A_32_P222149  | 2,45E-04 down    | -2,3933353 LRRC72    | Homo sapiens leucine rich repeat containing 72 (LRRC72), mRNA [NM_001195280]                                                          |
| A_33_P3258339 | 0,00401824 down  | -1,5922018 LRRC75A   | Homo sapiens leucine rich repeat containing 75A (LRRC75A), transcript variant 1, mRNA [NM_001113567]                                  |
| A_23_P368484  | 6,69E-05 up      | 3,0368626 LRRC75A    | Homo sapiens leucine rich repeat containing 75A (LRRC75A), transcript variant 2, mRNA [NM_207387]                                     |
| A_21_P0000529 | 0,008317401 up   | 2,49926 LRRC75A-AS1  | Homo sapiens LRRC75A antisense RNA 1 (LRRC75A-AS1), transcript variant 20, long non-coding RNA [NR_027176]                            |
| A_33_P3420446 | 1,53E-04 down    | -7,0295076 LRRD1     | Homo sapiens leucine-rich repeats and death domain containing 1 (LRRD1), mRNA [NM_001161528]                                          |
| A_33_P3358648 | 0,003372378 up   | 1,5558778 LRRFIP1    | Homo sapiens leucine rich repeat (in FLI) interacting protein 1 (LRRFIP1), transcript variant 3, mRNA [NM_001137552]                  |
| A_33_P3292387 | 2,14E-05 down    | -6,217423 LRRIQ3     | Homo sapiens leucine-rich repeats and IQ motif containing 3 (LRRIQ3), mRNA [NM_001105659]                                             |
| A_33_P3381478 | 0,009728421 up   | 1,5799105 LRRIQ3     | Homo sapiens leucine-rich repeats and IQ motif containing 3 (LRRIQ3), mRNA [NM_001105659]                                             |
| A_23_P351913  | 0,01982202 down  | -1,8701682 LRRN4     | Homo sapiens leucine rich repeat neuronal 4 (LRRN4), mRNA [NM_152611]                                                                 |
| A_23_P131330  | 0,040538747 down | -1,8405358 LRRTM1    | Homo sapiens leucine rich repeat transmembrane neuronal 1 (LRRTM1), mRNA [NM_178839]                                                  |
| A_33_P3251024 | 6,27E-05 down    | -2,4655702 LRRTM2    | Homo sapiens leucine rich repeat transmembrane neuronal 2 (LRRTM2), mRNA [NM_015564]                                                  |
| A_24_P140569  | 0,030658914 up   | 1,8946028 LRRTM2     | Homo sapiens leucine rich repeat transmembrane neuronal 2 (LRRTM2), mRNA [NM_015564]                                                  |
| A_24_P666105  | 0,013896322 up   | 2,4680288 LRRTM4     | Homo sapiens leucine rich repeat transmembrane neuronal 4 (LRRTM4), transcript variant 1, mRNA [NM_001134745]                         |
| A_33_P3216651 | 0,037950173 down | -2,4116886 LRTOMT    | Homo sapiens leucine rich transmembrane and O-methyltransferase domain containing (LRTOMT), transcript variant 6, mRNA [NM_001145310] |
| A_23_P368195  | 0,036415886 up   | 1,5082973 LSM11      | Homo sapiens LSM11, U7 small nuclear RNA associated (LSM11), mRNA [NM_173491]                                                         |
| A_21_P0013035 | 0,007954476 down | -1,8766198 LSM14A    | Homo sapiens LSM14A, SCD6 homolog A (S. cerevisiae) (LSM14A), transcript variant 2, mRNA [NM_015578]                                  |
| A_23_P323783  | 7,80E-04 down    | -1,5597228 LSM14B    | Homo sapiens LSM14B, SCD6 homolog B (S. cerevisiae) (LSM14B), mRNA [NM_144703]                                                        |
| A_33_P3349776 | 3,50E-04 down    | -1,7401884 LSM14B    | Homo sapiens LSM14B, SCD6 homolog B (S. cerevisiae) (LSM14B), mRNA [NM_144703]                                                        |
| A_32_P466877  | 0,036480986 up   | 2,4479024 LSMEM2     | leucine-rich single-pass membrane protein 2 [Source:HGNC Symbol;Acc:HGNC:26781] [ENST00000316436]                                     |
| A_23_P142389  | 0,001212374 up   | 1,6296514 LSR        | Homo sapiens lipolysis stimulated lipoprotein receptor (LSR), transcript variant 2, mRNA [NM_205834]                                  |
| A_23_P156683  | 0,023978427 down | -2,0891063 LTA       | Homo sapiens lymphotoxin alpha (LTA), transcript variant 2, mRNA [NM_000595]                                                          |
| A_23_P163173  | 0,002780756 down | -1,9424365 LTB4R2    | Homo sapiens leukotriene B4 receptor 2 (LTB4R2), transcript variant 1, mRNA [NM_019839]                                               |
| A_33_P3278826 | 0,004520775 down | -2,2895336 LTK       | leukocyte receptor tyrosine kinase [Source:HGNC Symbol;Acc:HGNC:6721] [ENST00000563518]                                               |
| A_23_P122624  | 0,011912887 up   | 1,5103949 LTV1       | Homo sapiens LTV1 ribosome biogenesis factor (LTV1), mRNA [NM_032860]                                                                 |
| A_33_P3291569 | 0,016530352 up   | 1,5058268 LUC7L3     | Homo sapiens LUC7-like 3 (S. cerevisiae) (LUC7L3), transcript variant 1, mRNA [NM_016424]                                             |
| A_33_P3246997 | 7,02E-04 up      | 1,7699775 LUC7L3     | LUC7-like 3 (S. cerevisiae) [Source:HGNC Symbol;Acc:HGNC:24309] [ENST00000506686]                                                     |
| A_21_P0004568 | 0,03822696 down  | -1,5382239 LUCAT1    | lung cancer associated transcript 1 (non-protein coding) [Source:HGNC Symbol;Acc:HGNC:48498] [ENST00000513626]                        |
| A_24_P649282  | 0,009919231 up   | 1,5013951 LUZP2      | Homo sapiens leucine zipper protein 2 (LUZP2), transcript variant 1, mRNA [NM_001009909]                                              |
| A_33_P3230090 | 6,64E-04 down    | -1,8521699 LUZP6     | Homo sapiens leucine zipper protein 6 (LUZP6), mRNA [NM_001128619]                                                                    |
| A_24_P7584    | 0,007470159 down | -2,3366644 LY6G5C    | Homo sapiens lymphocyte antigen 6 complex, locus G5C (LY6G5C), mRNA [NM_025262]                                                       |

|                |             |      |            |             |                                                                                                                                         |
|----------------|-------------|------|------------|-------------|-----------------------------------------------------------------------------------------------------------------------------------------|
| A_33_P3275722  | 2,97E-04    | down | -2,375565  | LY6G6D      | Homo sapiens lymphocyte antigen 6 complex, locus G6D (LY6G6D), mRNA [NM_021246]                                                         |
| A_33_P3410232  | 0,005701698 | down | -2,9748836 | LY6G6E      | Homo sapiens lymphocyte antigen 6 complex, locus G6E (pseudogene) (LY6G6E), transcript variant 1, non-coding RNA [NR_024541]            |
| A_33_P3277097  | 0,002263848 | down | -2,4196107 | LY6G6E      | Homo sapiens lymphocyte antigen 6 complex, locus G6E (pseudogene) (LY6G6E), transcript variant 2, non-coding RNA [NR_003673]            |
| A_23_P70688    | 0,009006206 | down | -1,6368446 | LY86        | Homo sapiens lymphocyte antigen 86 (LY86), mRNA [NM_004271]                                                                             |
| A_24_P324674   | 1,00E-03    | down | -3,2344613 | LY9         | Homo sapiens lymphocyte antigen 9 (LY9), transcript variant 1, mRNA [NM_002348]                                                         |
| A_33_P3215422  | 0,0011589   | down | -2,4098272 | LYL1        | Homo sapiens lymphoblastic leukemia associated hematopoiesis regulator 1 (LYL1), mRNA [NM_005583]                                       |
| A_23_P311780   | 0,020435786 | down | -2,1101465 | LYPD4       | Homo sapiens LY6/PLAUR domain containing 4 (LYPD4), transcript variant 1, mRNA [NM_173506]                                              |
| A_21_P0009657  | 0,013676779 | up   | 1,6043092  | LYPD5       | LY6/PLAUR domain containing 5 [Source:HGNC Symbol;Acc:HGNC:26397] [ENST00000599397]                                                     |
| A_33_P3258510  | 0,008422169 | up   | 1,6364477  | LYPLA2      | Homo sapiens lysophospholipase II (LYPLA2), mRNA [NM_007260]                                                                            |
| A_24_P276490   | 0,044998635 | up   | 1,5612335  | LYPLA2      | Homo sapiens lysophospholipase II (LYPLA2), mRNA [NM_007260]                                                                            |
| A_33_P3312611  | 0,018514456 | up   | 2,0208094  | LYPLAL1-AS1 | Homo sapiens LYPLAL1 antisense RNA 1 (head to head) (LYPLAL1-AS1), long non-coding RNA [NR_038845]                                      |
| A_33_P3288484  | 0,008144885 | down | -1,6318748 | LYRM2       | Homo sapiens LYR motif containing 2 (LYRM2), transcript variant 1, mRNA [NM_020466]                                                     |
| A_24_P26554    | 0,013847774 | up   | 1,5175674  | LYRM4       | Homo sapiens LYR motif containing 4 (LYRM4), transcript variant 1, mRNA [NM_020408]                                                     |
| A_24_P648176   | 0,015015048 | down | -2,484134  | LYRM5       | Homo sapiens LYR motif containing 5 (LYRM5), mRNA [NM_001001660]                                                                        |
| A_23_P354074   | 0,006300472 | up   | 1,8371681  | LYST        | Homo sapiens lysosomal trafficking regulator (LYST), transcript variant 1, mRNA [NM_000081]                                             |
| A_23_P130056   | 0,019320456 | up   | 1,9696681  | LYZL6       | Homo sapiens lysozyme-like 6 (LYZL6), transcript variant 2, mRNA [NM_020426]                                                            |
| A_33_P3212302  | 0,036582347 | up   | 1,5158855  | LZTS1       | Homo sapiens leucine zipper, putative tumor suppressor 1 (LZTS1), mRNA [NM_021020]                                                      |
| A_33_P3254666  | 0,016913267 | down | -1,587856  | LZTS2       | Homo sapiens cDNA FLJ40678 fis, clone THYMUJ2022660. [AK097997]                                                                         |
| A_24_P160696   | 0,029818017 | up   | 1,5104735  | MAATS1      | Homo sapiens MYCBP-associated, testis expressed 1 (MAATS1), mRNA [NM_033364]                                                            |
| A_23_P343366   | 0,008271859 | down | -1,6528074 | MAB21L3     | Homo sapiens mab-21-like 3 (C. elegans) (MAB21L3), mRNA [NM_152367]                                                                     |
| A_23_P391778   | 0,001112525 | up   | 1,9133213  | MACF1       | Homo sapiens microtubule-actin crosslinking factor 1 (MACF1), mRNA [NM_012090]                                                          |
| A_24_P418637   | 0,029811347 | up   | 1,6760046  | MACF1       | Homo sapiens microtubule-actin crosslinking factor 1 (MACF1), mRNA [NM_012090]                                                          |
| A_33_P3359253  | 0,037550688 | down | -1,7886592 | MAD2L2      | MAD2 mitotic arrest deficient-like 2 (yeast) [Source:HGNC Symbol;Acc:HGNC:6764] [ENST00000376655]                                       |
| A_33_P3359250  | 5,01E-04    | down | -2,6350017 | MAD2L2      | MAD2 mitotic arrest deficient-like 2 (yeast) [Source:HGNC Symbol;Acc:HGNC:6764] [ENST00000376664]                                       |
| A_33_P3416767  | 0,001696284 | up   | 1,7473966  | MAFG        | Homo sapiens v-maf avian musculoaponeurotic fibrosarcoma oncogene homolog G (MAFG), transcript variant 2, mRNA [NM_032711]              |
| A_33_P3241325  | 0,003155357 | down | -1,5587494 | MAFG-AS1    | Homo sapiens MAFG antisense RNA 1 (head to head) (MAFG-AS1), long non-coding RNA [NR_015454]                                            |
| A_33_P3406828  | 1,80E-04    | down | -2,787117  | MAFIP       | Homo sapiens MAFF interacting protein (pseudogene) (MAFIP), transcript variant 1, non-coding RNA [NR_046439]                            |
| A_33_P3272823  | 0,003409972 | down | -2,8012407 | MAG         | Homo sapiens myelin associated glycoprotein (MAG), transcript variant 1, mRNA [NM_002361]                                               |
| A_23_P96291    | 0,007732341 | up   | 1,5023415  | MAGEA1      | Homo sapiens melanoma antigen family A, 1 (MAGEA1), mRNA [NM_004988]                                                                    |
| A_24_P185945   | 0,01996031  | up   | 1,5547098  | MAGEA4      | Homo sapiens melanoma antigen family A, 4 (MAGEA4), transcript variant 2, mRNA [NM_002362]                                              |
| A_23_P136870   | 5,82E-05    | down | -3,1001205 | MAGEA6      | Homo sapiens melanoma antigen family A, 6 (MAGEA6), transcript variant 2, mRNA [NM_175868]                                              |
| A_23_P254831   | 9,46E-04    | down | -1,8332686 | MAGEB2      | Homo sapiens melanoma antigen family B, 2 (MAGEB2), mRNA [NM_002364]                                                                    |
| A_33_P3405509  | 0,006540382 | up   | 1,5670403  | MAGEB5      | Homo sapiens melanoma antigen family B, 5 (MAGEB5), mRNA [NM_001271752]                                                                 |
| A_33_P3213204  | 0,02218047  | up   | 1,6637679  | MAGEF1      | Homo sapiens melanoma antigen family F, 1 (MAGEF1), mRNA [NM_022149]                                                                    |
| A_23_P99996    | 6,10E-04    | down | -3,0282664 | MAGEL2      | Homo sapiens MAGE-like 2 (MAGEL2), mRNA [NM_019066]                                                                                     |
| A_33_P3369535  | 0,027161095 | down | -2,0121102 | MAGI1       | Homo sapiens membrane associated guanylate kinase, WW and PDZ domain containing 1 (MAGI1), transcript variant 2, mRNA [NM_004742]       |
| A_33_P3369530  | 0,006354068 | up   | 1,8876338  | MAGI1       | Homo sapiens membrane associated guanylate kinase, WW and PDZ domain containing 1 (MAGI1), transcript variant 1, mRNA [NM_015520]       |
| A_24_P75220    | 0,011313551 | up   | 1,5294299  | MAGI1       | Homo sapiens membrane associated guanylate kinase, WW and PDZ domain containing 1 (MAGI1), transcript variant 2, mRNA [NM_004742]       |
| A_23_P200216   | 0,012985399 | up   | 1,5253428  | MAGOH       | Homo sapiens mago-nashi homolog, proliferation-associated (Drosophila) (MAGOH), mRNA [NM_002370]                                        |
| A_23_P148273   | 0,00637643  | down | -1,8399441 | MAGT1       | Homo sapiens magnesium transporter 1 (MAGT1), mRNA [NM_032121]                                                                          |
| A_33_P3244279  | 6,30E-04    | up   | 2,759087   | MAGT1       | Homo sapiens clone FLB3024 PRO0756 mRNA, complete cds. [AF130104]                                                                       |
| A_21_P0010808  | 0,042503312 | up   | 1,6721302  | MALRD1      | Homo sapiens MAM and LDL receptor class A domain containing 1 (MALRD1), mRNA [NM_001142308]                                             |
| A_21_P0010807  | 0,008914619 | up   | 1,5071123  | MALRD1      | Homo sapiens MAM and LDL receptor class A domain containing 1 (MALRD1), mRNA [NM_001142308]                                             |
| A_24_P116909   | 0,001067091 | up   | 1,842436   | MALT1       | Homo sapiens MALT1 paracaspase (MALT1), transcript variant 1, mRNA [NM_006785]                                                          |
| A_33_P3220149  | 0,014194852 | down | -1,6238451 | MAML1       | mastermind-like 1 (Drosophila) [Source:HGNC Symbol;Acc:HGNC:13632] [ENST00000503050]                                                    |
| A_23_P110606   | 0,002284292 | up   | 1,6225219  | MAML1       | Homo sapiens mastermind-like 1 (Drosophila) (MAML1), mRNA [NM_014757]                                                                   |
| A_33_P3335371  | 0,03594006  | down | -1,5356039 | MAML3       | Homo sapiens mastermind-like 3 (Drosophila) (MAML3), mRNA [NM_018717]                                                                   |
| A_33_P3357573  | 0,031085104 | down | -1,5982143 | MAML3       | Homo sapiens mastermind-like 3 (Drosophila) (MAML3), mRNA [NM_018717]                                                                   |
| A_24_P297537   | 0,003216366 | down | -1,7668031 | MAMSTR      | Homo sapiens MEF2 activating motif and SAP domain containing transcriptional regulator (MAMSTR), transcript variant 2, mRNA [NM_182574] |
| A_24_P187921   | 0,011465751 | down | -2,072286  | MANEA       | Homo sapiens mannosidase, endo-alpha (MANEA), mRNA [NM_024641]                                                                          |
| A_23_P132793   | 0,044265483 | down | -1,6440865 | MANF        | Homo sapiens mesencephalic astrocyte-derived neurotrophic factor (MANF), mRNA [NM_006010]                                               |
| A_33_P3242543  | 0,001709668 | up   | 1,7940465  | MAOA        | Homo sapiens monoamine oxidase A (MAOA), transcript variant 2, mRNA [NM_001270458]                                                      |
| A_23_P163455   | 0,015003612 | down | -2,039289  | MAP1A       | Homo sapiens microtubule-associated protein 1A (MAP1A), mRNA [NM_002373]                                                                |
| A_23_P20248    | 8,31E-04    | up   | 1,8232006  | MAP2K1      | Homo sapiens mitogen-activated protein kinase kinase 1 (MAP2K1), mRNA [NM_002755]                                                       |
| A_23_P118427   | 0,005329644 | up   | 1,8167671  | MAP2K3      | Homo sapiens mitogen-activated protein kinase kinase 3 (MAP2K3), transcript variant B, mRNA [NM_145109]                                 |
| A_24_P296698   | 0,028025737 | up   | 1,5437715  | MAP2K3      | Homo sapiens mitogen-activated protein kinase kinase 3 (MAP2K3), transcript variant B, mRNA [NM_145109]                                 |
| A_23_P58031    | 0,017667292 | up   | 1,6788749  | MAP3K13     | Homo sapiens mitogen-activated protein kinase kinase kinase 13 (MAP3K13), transcript variant 1, mRNA [NM_004721]                        |
| A_19_P00324286 | 0,007768023 | up   | 1,5396519  | MAP3K13     | Homo sapiens mitogen-activated protein kinase kinase kinase 13 (MAP3K13), transcript variant 4, non-coding RNA [NR_038322]              |
| A_24_P63078    | 0,005491082 | up   | 1,8178045  | MAP3K19     | Homo sapiens mitogen-activated protein kinase kinase kinase 19 (MAP3K19), transcript variant 1, mRNA [NM_020502]                        |
| A_23_P134125   | 0,024195522 | up   | 1,5069194  | MAP3K5      | Homo sapiens mitogen-activated protein kinase kinase kinase 5 (MAP3K5), mRNA [NM_005923]                                                |
| A_23_P500773   | 0,00186588  | up   | 1,5652468  | MAP3K7      | Homo sapiens mitogen-activated protein kinase kinase kinase 7 (MAP3K7), transcript variant A, mRNA [NM_003188]                          |

|                |             |      |            |              |                                                                                                                                      |
|----------------|-------------|------|------------|--------------|--------------------------------------------------------------------------------------------------------------------------------------|
| A_33_P3238310  | 0,001371857 | down | -1,7792462 | MAP3K7CL     | Homo sapiens MAP3K7 C-terminal like (MAP3K7CL), transcript variant 8, mRNA [NM_001286623]                                            |
| A_23_P57277    | 0,005593776 | up   | 2,377055   | MAP3K7CL     | Homo sapiens MAP3K7 C-terminal like (MAP3K7CL), transcript variant 1, mRNA [NM_020152]                                               |
| A_33_P3246505  | 0,017297868 | up   | 2,5002482  | MAP3K8       | mitogen-activated protein kinase kinase kinase 8 [Source:HGNC Symbol;Acc:HGNC:6860] [ENST00000375322]                                |
| A_23_P23947    | 0,009185061 | up   | 2,4190743  | MAP3K8       | Homo sapiens mitogen-activated protein kinase kinase kinase 8 (MAP3K8), transcript variant 1, mRNA [NM_005204]                       |
| A_33_P3323435  | 4,99E-04    | up   | 2,2391062  | MAP3K9       | Homo sapiens mitogen-activated protein kinase kinase kinase 9 (MAP3K9), transcript variant 1, mRNA [NM_033141]                       |
| A_33_P3379571  | 0,033511776 | up   | 1,607734   | MAP3K9       | Homo sapiens mitogen-activated protein kinase kinase kinase 9 (MAP3K9), transcript variant 1, mRNA [NM_033141]                       |
| A_33_P3346573  | 6,07E-05    | down | -2,064614  | MAP4         | Homo sapiens microtubule-associated protein 4 (MAP4), transcript variant 4, mRNA [NM_001134364]                                      |
| A_33_P3354137  | 5,89E-04    | down | -2,6352262 | MAP4         | Homo sapiens microtubule-associated protein 4 (MAP4), transcript variant 3, mRNA [NM_030885]                                         |
| A_23_P5002     | 0,001021598 | down | -2,840189  | MAP4K1       | Homo sapiens mitogen-activated protein kinase kinase kinase kinase 1 (MAP4K1), transcript variant 1, mRNA [NM_001042600]             |
| A_23_P90804    | 0,004319808 | up   | 1,8926725  | MAP4K4       | Homo sapiens mitogen-activated protein kinase kinase kinase kinase 4 (MAP4K4), transcript variant 2, mRNA [NM_145686]                |
| A_33_P3279841  | 0,035786662 | up   | 1,5834215  | MAPK8IP3     | Homo sapiens mitogen-activated protein kinase 8 interacting protein 3 (MAPK8IP3), transcript variant 1, mRNA [NM_015133]             |
| A_23_P216894   | 0,037850536 | up   | 1,5968746  | MAPKAP1      | Homo sapiens mitogen-activated protein kinase associated protein 1 (MAPKAP1), transcript variant 1, mRNA [NM_001006617]              |
| A_24_P124662   | 0,003858582 | up   | 1,5630234  | MAPKAPK5     | Homo sapiens mitogen-activated protein kinase-activated protein kinase 5 (MAPKAPK5), transcript variant 2, mRNA [NM_139078]          |
| A_23_P99204    | 0,005419465 | up   | 1,6991384  | MAPKAPK5-AS1 | Homo sapiens MAPKAPK5 antisense RNA 1 (MAPKAPK5-AS1), long non-coding RNA [NR_015404]                                                |
| A_21_P0007761  | 0,007063204 | up   | 1,5074999  | MAPKAPK5-AS1 | Homo sapiens MAPKAPK5 antisense RNA 1 (MAPKAPK5-AS1), long non-coding RNA [NR_015404]                                                |
| A_21_P0014032  | 0,002965167 | down | -1,8313522 | MAPT-IT1     | Homo sapiens MAPT intronic transcript 1 (non-protein coding) (MAPT-IT1), long non-coding RNA [NR_024560]                             |
| A_23_P110492   | 0,012284086 | up   | 1,5136778  | MARCH6       | Homo sapiens membrane-associated ring finger (C3HC4) 6, E3 ubiquitin protein ligase (MARCH6), transcript variant 1, mRNA [NM_005885] |
| A_23_P310      | 0,013619931 | up   | 1,9864509  | MARCKSL1     | Homo sapiens MARCKS-like 1 (MARCKSL1), transcript variant 1, mRNA [NM_023009]                                                        |
| A_24_P914495   | 0,011688267 | down | -1,5616211 | MARK2        | Homo sapiens MAP/microtubule affinity-regulating kinase 2 (MARK2), transcript variant 3, mRNA [NM_004954]                            |
| A_23_P101480   | 0,009107015 | down | -1,7050976 | MAST1        | Homo sapiens microtubule associated serine/threonine kinase 1 (MAST1), mRNA [NM_014975]                                              |
| A_24_P84340    | 0,0280801   | down | -2,154636  | MAST4        | Homo sapiens microtubule associated serine/threonine kinase family member 4 (MAST4), transcript variant 2, mRNA [NM_198828]          |
| A_33_P3403044  | 0,002129745 | up   | 1,6060967  | MAT2A        | Homo sapiens methionine adenosyltransferase II, alpha (MAT2A), mRNA [NM_005911]                                                      |
| A_23_P401568   | 3,29E-04    | up   | 1,9942687  | MAT2A        | Homo sapiens methionine adenosyltransferase II, alpha (MAT2A), mRNA [NM_005911]                                                      |
| A_23_P50678    | 0,032507036 | up   | 1,7295928  | MATK         | Homo sapiens megakaryocyte-associated tyrosine kinase (MATK), transcript variant 1, mRNA [NM_139355]                                 |
| A_32_P902988   | 0,012739374 | down | -1,823178  | MATN1        | Homo sapiens matrilin 1, cartilage matrix protein (MATN1), mRNA [NM_002379]                                                          |
| A_23_P71328    | 0,00441701  | down | -2,5255136 | MATN2        | Homo sapiens matrilin 2 (MATN2), transcript variant 2, mRNA [NM_030583]                                                              |
| A_19_P00319465 | 0,00855925  | up   | 1,520238   | MAVS         | Homo sapiens mitochondrial antiviral signaling protein (MAVS), transcript variant 1, mRNA [NM_020746]                                |
| A_23_P415395   | 0,02552089  | down | -1,8821733 | MBD3L1       | Homo sapiens methyl-CpG binding domain protein 3-like 1 (MBD3L1), mRNA [NM_145208]                                                   |
| A_23_P378450   | 6,15E-04    | up   | 1,8693514  | MBD3L2       | Homo sapiens methyl-CpG binding domain protein 3-like 2 (MBD3L2), mRNA [NM_144614]                                                   |
| A_33_P3269388  | 0,004076998 | up   | 1,6246194  | MBOAT7       | Homo sapiens membrane bound O-acyltransferase domain containing 7 (MBOAT7), transcript variant 4, mRNA [NM_001146082]                |
| A_23_P208085   | 0,033940904 | up   | 2,306321   | MBP          | Homo sapiens myelin basic protein (MBP), transcript variant 7, mRNA [NM_001025101]                                                   |
| A_33_P3227990  | 0,00146357  | up   | 1,8949925  | MBP          | Homo sapiens myelin basic protein (MBP), transcript variant 7, mRNA [NM_001025101]                                                   |
| A_24_P402080   | 0,004132152 | up   | 1,5414695  | MBP          | Homo sapiens myelin basic protein (MBP), transcript variant 8, mRNA [NM_001025100]                                                   |
| A_32_P58937    | 0,001633452 | up   | 1,5885934  | MBTD1        | Homo sapiens mbt domain containing 1 (MBTD1), mRNA [NM_017643]                                                                       |
| A_23_P14948    | 0,003072893 | up   | 1,5503612  | MBTPS1       | Homo sapiens membrane-bound transcription factor peptidase, site 1 (MBTPS1), mRNA [NM_003791]                                        |
| A_23_P114095   | 0,002888899 | down | -1,5812219 | MBTPS2       | Homo sapiens membrane-bound transcription factor peptidase, site 2 (MBTPS2), mRNA [NM_015884]                                        |
| A_33_P3318642  | 0,012690086 | down | -2,237437  | MC1R         | melanocortin 1 receptor (alpha melanocyte stimulating hormone receptor) [Source:HGNC Symbol;Acc:HGNC:6929] [ENST00000539976]         |
| A_23_P38649    | 0,005708573 | down | -2,6989307 | MC2R         | Homo sapiens melanocortin 2 receptor (adrenocorticotrophic hormone) (MC2R), mRNA [NM_000529]                                         |
| A_23_P50039    | 0,001365967 | down | -2,9424393 | MC5R         | Homo sapiens melanocortin 5 receptor (MC5R), mRNA [NM_005913]                                                                        |
| A_23_P330561   | 5,33E-05    | down | -3,7693567 | MCEMP1       | Homo sapiens mast cell-expressed membrane protein 1 (MCEMP1), mRNA [NM_174918]                                                       |
| A_23_P88099    | 0,001494988 | down | -2,0908046 | MCF2L        | Homo sapiens MCF.2 cell line derived transforming sequence-like (MCF2L), transcript variant 2, mRNA [NM_024979]                      |
| A_19_P00322757 | 1,56E-05    | down | -7,4011693 | MCF2L        | MCF.2 cell line derived transforming sequence-like [Source:HGNC Symbol;Acc:HGNC:14576] [ENST00000442625]                             |
| A_24_P103060   | 0,004736973 | up   | 1,7019986  | MCFD2        | Homo sapiens multiple coagulation factor deficiency 2 (MCFD2), transcript variant 1, mRNA [NM_139279]                                |
| A_33_P3393311  | 0,007953781 | down | -2,2043447 | MCHR1        | Homo sapiens melanin-concentrating hormone receptor 1 (MCHR1), mRNA [NM_005297]                                                      |
| A_24_P336759   | 0,01271178  | up   | 1,6743331  | MCL1         | Homo sapiens myeloid cell leukemia 1 (MCL1), transcript variant 1, mRNA [NM_021960]                                                  |
| A_23_P397347   | 0,011300852 | up   | 1,583166   | MCM9         | Homo sapiens minichromosome maintenance complex component 9 (MCM9), transcript variant 2, mRNA [NM_153255]                           |
| A_24_P244944   | 0,024573645 | down | -1,6570293 | MCTP2        | Homo sapiens multiple C2 domains, transmembrane 2 (MCTP2), transcript variant 1, mRNA [NM_018349]                                    |
| A_33_P3296193  | 0,025928678 | down | -1,7219698 | MCTS2P       | Homo sapiens malignant T cell amplified sequence 2, pseudogene (MCTS2P), non-coding RNA [NR_003677]                                  |
| A_23_P346405   | 0,002731906 | up   | 1,9808964  | MCU          | Homo sapiens mitochondrial calcium uniporter (MCU), transcript variant 1, mRNA [NM_138357]                                           |
| A_33_P3421867  | 5,77E-05    | down | -3,20775   | MDGA1        | MAM domain containing glycosylphosphatidylinositol anchor 1 [Source:HGNC Symbol;Acc:HGNC:19267] [ENST00000373401]                    |
| A_23_P105730   | 0,017192103 | down | -1,7158177 | MDM1         | Homo sapiens Mdm1 nuclear protein homolog (mouse) (MDM1), transcript variant 2, mRNA [NM_020128]                                     |
| A_33_P3361707  | 0,007522723 | down | -1,9325333 | MDM2         | Homo sapiens MDM2 proto-oncogene, E3 ubiquitin protein ligase (MDM2), transcript variant 1, mRNA [NM_002392]                         |
| A_23_P502750   | 0,001828127 | up   | 1,691623   | MDM2         | Homo sapiens MDM2 proto-oncogene, E3 ubiquitin protein ligase (MDM2), transcript variant 1, mRNA [NM_002392]                         |
| A_19_P00320719 | 0,001351993 | up   | 1,769058   | MDM4         | Homo sapiens MDM4, p53 regulator (MDM4), transcript variant 1, mRNA [NM_002393]                                                      |
| A_23_P365060   | 0,003667409 | up   | 1,9061389  | MDN1         | Homo sapiens MDN1, midasin homolog (yeast) (MDN1), mRNA [NM_014611]                                                                  |
| A_23_P323196   | 0,002701155 | up   | 1,5520177  | MDS2         | Homo sapiens myelodysplastic syndrome 2 translocation associated (MDS2), long non-coding RNA [NR_027042]                             |
| A_32_P32905    | 0,006834899 | up   | 1,8450972  | MEAF6        | Homo sapiens MYST/Esa1-associated factor 6 (MEAF6), transcript variant 1, mRNA [NM_022756]                                           |
| A_24_P320103   | 0,001471606 | down | -1,6215931 | MECOM        | Homo sapiens MDS1 and EVI1 complex locus (MECOM), transcript variant 4, mRNA [NM_004991]                                             |
| A_33_P3888629  | 0,009934093 | up   | 1,7395353  | MECOM        | Homo sapiens MDS1 and EVI1 complex locus (MECOM), transcript variant 6, mRNA [NM_001164000]                                          |
| A_33_P3317211  | 0,001435448 | down | -1,6290061 | MECP2        | Homo sapiens methyl CpG binding protein 2 (MECP2), transcript variant 2, mRNA [NM_001110792]                                         |
| A_24_P237486   | 0,005128513 | up   | 1,5629245  | MECP2        | Homo sapiens methyl CpG binding protein 2 (MECP2), transcript variant 1, mRNA [NM_004992]                                            |

|                |                  |                           |                                                                                                                                             |
|----------------|------------------|---------------------------|---------------------------------------------------------------------------------------------------------------------------------------------|
| A_23_P73702    | 0,009597085 up   | 1,5282973 MED12           | Homo sapiens mediator complex subunit 12 (MED12), mRNA [NM_005120]                                                                          |
| A_32_P701268   | 0,005207061 up   | 1,6475548 MED12L          | Homo sapiens mediator complex subunit 12-like (MED12L), mRNA [NM_053002]                                                                    |
| A_33_P3223759  | 0,005624732 up   | 1,5288526 MED13           | Homo sapiens mediator complex subunit 13 (MED13), mRNA [NM_005121]                                                                          |
| A_23_P21120    | 0,018708179 up   | 1,5747808 MED14           | mediator complex subunit 14 [Source:HGNC Symbol;Acc:HGNC:2370] [ENST00000324817]                                                            |
| A_24_P207727   | 0,014027731 up   | 1,7538003 MED15           | Homo sapiens mediator complex subunit 15 (MED15), transcript variant 1, mRNA [NM_001003891]                                                 |
| A_23_P138105   | 1,61E-05 down    | -2,8731956 MED18          | Homo sapiens mediator complex subunit 18 (MED18), transcript variant 1, mRNA [NM_017638]                                                    |
| A_23_P164737   | 0,005338272 up   | 1,5029979 MED26           | Homo sapiens mediator complex subunit 26 (MED26), mRNA [NM_004831]                                                                          |
| A_33_P3354771  | 1,82E-04 down    | -2,06769 MEF2BNB          | MEF2B neighbor [Source:HGNC Symbol;Acc:HGNC:37247] [ENST00000591566]                                                                        |
| A_24_P914940   | 0,009790556 down | -1,536852 MEF2BNB         | Homo sapiens MEF2B neighbor (MEF2BNB), transcript variant 1, mRNA [NM_001145784]                                                            |
| A_33_P3341656  | 0,030461814 up   | 1,5093846 MEF2D           | Homo sapiens myocyte enhancer factor 2D (MEF2D), transcript variant 1, mRNA [NM_005920]                                                     |
| A_23_P140967   | 0,012199974 down | -3,3862178 MEFV           | Homo sapiens Mediterranean fever (MEFV), transcript variant 1, mRNA [NM_000243]                                                             |
| A_32_P129894   | 0,009926206 up   | 1,6731288 MEGF9           | Homo sapiens multiple EGF-like-domains 9 (MEGF9), mRNA [NM_001080497]                                                                       |
| A_23_P94422    | 0,001898999 up   | 1,6393847 MELK            | Homo sapiens maternal embryonic leucine zipper kinase (MELK), transcript variant 1, mRNA [NM_014791]                                        |
| A_23_P155931   | 0,037688866 up   | 2,6468644 MEPE            | Homo sapiens matrix extracellular phosphoglycoprotein (MEPE), transcript variant 2, mRNA [NM_020203]                                        |
| A_23_P99891    | 0,001541975 up   | 1,6707851 MESDC1          | Homo sapiens mesoderm development candidate 1 (MESDC1), mRNA [NM_022566]                                                                    |
| A_24_P141736   | 0,019215584 up   | 1,9375159 METAP2          | Homo sapiens methionyl aminopeptidase 2 (METAP2), mRNA [NM_006838]                                                                          |
| A_19_P00804755 | 0,002161007 down | -1,604823 METTL15         | Homo sapiens methyltransferase like 15 (METTL15), transcript variant 2, mRNA [NM_152636]                                                    |
| A_24_P212074   | 0,006087913 up   | 1,6536155 METTL21C        | Homo sapiens methyltransferase like 21C (METTL21C), mRNA [NM_001010977]                                                                     |
| A_33_P3384322  | 0,010277949 up   | 1,6992383 METTL22         | methyltransferase like 22 [Source:HGNC Symbol;Acc:HGNC:28368] [ENST00000381920]                                                             |
| A_24_P64653    | 0,003744374 down | -2,4848907 METTL7B        | Homo sapiens methyltransferase like 7B (METTL7B), mRNA [NM_152637]                                                                          |
| A_23_P39453    | 0,025701828 down | -1,8752239 MEX3D          | Homo sapiens mex-3 RNA binding family member D (MEX3D), transcript variant 1, mRNA [NM_203304]                                              |
| A_33_P3256680  | 0,013176124 up   | 1,8891271 MFHAS1          | Homo sapiens mitogen-activated protein kinase 1 (MFHAS1), mRNA [NM_004225]                                                                  |
| A_33_P3320277  | 0,038532715 down | -1,5010661 MFN2           | Homo sapiens mitofusin 2 (MFN2), transcript variant 1, mRNA [NM_014874]                                                                     |
| A_23_P41246    | 0,001961342 up   | 1,5904489 MFSD10          | Homo sapiens major facilitator superfamily domain containing 10 (MFSD10), transcript variant 1, mRNA [NM_001120]                            |
| A_23_P10062    | 0,010827144 up   | 1,7645781 MGAT4C          | Homo sapiens MGAT4 family, member C (MGAT4C), mRNA [NM_013244]                                                                              |
| A_21_P0010572  | 0,028876297 up   | 2,6149817 MGAT4EP         | Homo sapiens MGAT4 family, member E, pseudogene (MGAT4EP), non-coding RNA [NR_038135]                                                       |
| A_21_P0000716  | 0,003763005 up   | 1,5229214 MGAT4EP         | Homo sapiens MGAT4 family, member E, pseudogene (MGAT4EP), non-coding RNA [NR_038135]                                                       |
| A_33_P3526315  | 5,23E-04 up      | 1,8847977 MGC12488        | Homo sapiens, clone IMAGE:3932794, mRNA. [BC005372]                                                                                         |
| A_23_P410469   | 0,004003068 up   | 1,5547153 MGC15885        | Homo sapiens uncharacterized protein MGC15885 (MGC15885), long non-coding RNA [NR_026897]                                                   |
| A_21_P0001689  | 9,15E-04 down    | -1,9717506 MGC27382       | Homo sapiens uncharacterized MGC27382 (MGC27382), long non-coding RNA [NR_027310]                                                           |
| A_21_P0009655  | 2,26E-04 down    | -2,2472506 MGC45922       | Homo sapiens uncharacterized LOC284365 (MGC45922), long non-coding RNA [NR_038359]                                                          |
| A_33_P3283213  | 0,016931621 up   | 1,6418042 MGC57346        | Homo sapiens ADP-ribosylation factor pseudogene (MGC57346), transcript variant 2, non-coding RNA [NR_027295]                                |
| A_23_P3402817  | 0,002759489 down | -2,1947258 MGC57346-CRHR1 | Homo sapiens MGC57346-CRHR1 readthrough (MGC57346-CRHR1), transcript variant 6, mRNA [NM_001303016]                                         |
| A_24_P67898    | 0,008551984 up   | 1,7535005 MGEA5           | Homo sapiens meningioma-expressed antigen 5s splice variant mRNA, complete cds. [AF307332]                                                  |
| A_21_P0014058  | 7,40E-04 up      | 2,9577873 MGST3           | microsomal glutathione S-transferase 3 [Source:HGNC Symbol;Acc:HGNC:7064] [ENST00000461759]                                                 |
| A_19_P00316194 | 0,04972662 down  | -1,9060684 MIAT           | Homo sapiens myocardial infarction associated transcript (non-protein coding) (MIAT), transcript variant 1, long non-coding RNA [NR_003491] |
| A_19_P00322828 | 0,004351653 down | -1,736303 MIAT            | Homo sapiens myocardial infarction associated transcript (non-protein coding) (MIAT), transcript variant 1, long non-coding RNA [NR_003491] |
| A_19_P00322705 | 0,010855231 down | -2,0042849 MIAT           | Homo sapiens myocardial infarction associated transcript (non-protein coding) (MIAT), transcript variant 1, long non-coding RNA [NR_003491] |
| A_19_P00319573 | 0,003389827 down | -2,2257543 MIAT           | myocardial infarction associated transcript (non-protein coding) [Source:HGNC Symbol;Acc:HGNC:33425] [ENST00000418918]                      |
| A_19_P00322706 | 3,32E-05 down    | -2,6597984 MIAT           | Homo sapiens myocardial infarction associated transcript (non-protein coding) (MIAT), transcript variant 1, long non-coding RNA [NR_003491] |
| A_19_P00318175 | 0,010241238 up   | 1,7715418 MIAT            | Homo sapiens myocardial infarction associated transcript (non-protein coding) (MIAT), transcript variant 2, long non-coding RNA [NR_033319] |
| A_33_P3589819  | 5,94E-04 down    | -2,072167 MIATNB          | Homo sapiens cDNA: FLJ22849 fis, clone KAI987. [AK026502]                                                                                   |
| A_33_P3315190  | 8,18E-04 down    | -2,0224578 MICAL2         | Homo sapiens microtubule associated monoxygenase, calponin and LIM domain containing 2 (MICAL2), transcript variant 5, mRNA [NM_001282666]  |
| A_33_P3277238  | 0,013301073 up   | 2,444692 MICU1            | mitochondrial calcium uptake 1 [Source:HGNC Symbol;Acc:HGNC:1530] [ENST00000603173]                                                         |
| A_21_P0006407  | 0,040905643 down | -1,7332528 MID1           | PREDICTED: Homo sapiens midline 1 (Opitz/BBB syndrome) (MID1), transcript variant X3, misc_RNA [XR_247300]                                  |
| A_21_P0006408  | 0,004775461 up   | 3,311436 MID1             | PREDICTED: Homo sapiens midline 1 (Opitz/BBB syndrome) (MID1), transcript variant X1, misc_RNA [XR_247298]                                  |
| A_32_P128656   | 0,021887286 up   | 1,8113108 MID1            | Homo sapiens midline 1 (MID1), transcript variant 1, mRNA [NM_000381]                                                                       |
| A_33_P3375528  | 0,002755834 down | -1,5285896 MIER3          | Homo sapiens mesoderm induction early response 1, family member 3 (MIER3), transcript variant 3, mRNA [NM_152622]                           |
| A_23_P18993    | 0,001299637 down | -2,1060343 MIER3          | Homo sapiens mesoderm induction early response 1, family member 3 (MIER3), transcript variant 3, mRNA [NM_152622]                           |
| A_24_P33982    | 1,82E-04 down    | -3,1755064 MILR1          | Homo sapiens mast cell immunoglobulin-like receptor 1 (MILR1), transcript variant S2, mRNA [NM_001291317]                                   |
| A_33_P3389133  | 0,030689828 down | -1,7485473 MINPP1         | Homo sapiens multiple inositol-polyphosphate phosphatase 1 (MINPP1), transcript variant 2, mRNA [NM_001178117]                              |
| A_23_P68998    | 0,003807367 down | -1,6993451 MIOX           | Homo sapiens myo-inositol oxygenase (MIOX), mRNA [NM_017584]                                                                                |
| A_19_P00322941 | 4,41E-07 down    | -4,0554934 MIR143HG       | MIR143 host gene (non-protein coding) [Source:HGNC Symbol;Acc:HGNC:42872] [ENST00000518014]                                                 |
| A_19_P00316284 | 0,04593981 down  | -1,7991551 MIR143HG       | MIR143 host gene (non-protein coding) [Source:HGNC Symbol;Acc:HGNC:42872] [ENST00000614517]                                                 |
| A_33_P3267612  | 4,36E-05 down    | -3,003199 MIR143HG        | Homo sapiens MIR143 host gene (non-protein coding) (MIR143HG), transcript variant 1, long non-coding RNA [NR_105059]                        |
| A_19_P00321399 | 0,003079232 down | -2,0186248 MIR143HG       | MIR143 host gene (non-protein coding) [Source:HGNC Symbol;Acc:HGNC:42872] [ENST00000505254]                                                 |
| A_21_P0004073  | 0,04853896 up    | 2,245014 MIR143HG         | Homo sapiens MIR143 host gene (non-protein coding) (MIR143HG), transcript variant 1, long non-coding RNA [NR_105059]                        |
| A_24_P253723   | 0,005076202 down | -1,5041326 MIR22HG        | Homo sapiens MIR22 host gene (non-protein coding) (MIR22HG), transcript variant 1, long non-coding RNA [NR_028502]                          |
| A_21_P0009446  | 0,010370562 up   | 1,6666968 MIR3976HG       | MIR3976 host gene (non-protein coding) [Source:HGNC Symbol;Acc:HGNC:51104] [ENST00000580378]                                                |
| A_23_P216935   | 0,021649934 up   | 1,977444 MIR600HG         | Homo sapiens MIR600 host gene (non-protein coding) (MIR600HG), long non-coding RNA [NR_026677]                                              |
| A_21_P0012131  | 0,002684358 down | -2,72532 MIR646HG         | Homo sapiens MIR646 host gene (non-protein coding) (MIR646HG), long non-coding RNA [NR_046099]                                              |



|                |             |      |            |            |                                                                                                                                                                |
|----------------|-------------|------|------------|------------|----------------------------------------------------------------------------------------------------------------------------------------------------------------|
| A_33_P3215288  | 0,016712015 | down | -1,8486344 | MIR646HG   | Homo sapiens cDNA FLJ46426 fis, clone THYMU3013897. [AK128288]                                                                                                 |
| A_32_P16053    | 0,022840051 | up   | 1,576171   | MIR663AHG  | Homo sapiens MIR663A host gene (non-protein coding) (MIR663AHG), long non-coding RNA [NR_040095]                                                               |
| A_21_P0010972  | 0,022541068 | up   | 1,6325399  | MIR670HG   | PREDICTED: Homo sapiens MIR670 host gene (non-protein coding) (MIR670HG), transcript variant X1, ncRNA [XR_109044]                                             |
| A_23_P353667   | 0,007241065 | down | -2,7483463 | MIR7-3HG   | Homo sapiens MIR7-3 host gene (non-protein coding) (MIR7-3HG), long non-coding RNA [NR_027148]                                                                 |
| A_33_P3265111  | 0,018409802 | up   | 1,9715332  | MIR7-3HG   | Homo sapiens MIR7-3 host gene (non-protein coding) (MIR7-3HG), long non-coding RNA [NR_027148]                                                                 |
| A_33_P3312384  | 7,73E-04    | down | -3,0419917 | MIR99AHG   | Homo sapiens mir-99a-let-7c cluster host gene (non-protein coding) (MIR99AHG), transcript variant 1, long non-coding RNA [NR_027790]                           |
| A_21_P0010141  | 0,006614401 | down | -1,9844428 | MIR99AHG   | mir-99a-let-7c cluster host gene (non-protein coding) [Source:HGNC Symbol;Acc:HGNC:1274] [ENST00000435697]                                                     |
| A_33_P3345479  | 0,01243664  | up   | 1,7927265  | MIRLET7BHG | Homo sapiens MIRLET7B host gene (non-protein coding) (MIRLET7BHG), transcript variant 1, long non-coding RNA [NR_027033]                                       |
| A_23_P364107   | 4,38E-05    | up   | 1,9610615  | MIS18BP1   | Homo sapiens MIS18 binding protein 1 (MIS18BP1), mRNA [NM_018353]                                                                                              |
| A_24_P346855   | 0,007944907 | up   | 1,645899   | MKI67      | Homo sapiens marker of proliferation Ki-67 (MKI67), transcript variant 1, mRNA [NM_002417]                                                                     |
| A_21_P0000789  | 0,002583901 | down | -2,3862584 | MKNK1-AS1  | Homo sapiens MKNK1 antisense RNA 1 (MKNK1-AS1), long non-coding RNA [NR_038403]                                                                                |
| A_23_P43350    | 0,0119388   | down | -2,5683417 | MLANA      | Homo sapiens melan-A (MLANA), mRNA [NM_005511]                                                                                                                 |
| A_21_P0002521  | 0,009276412 | down | -2,2020385 | MLK7-AS1   | Homo sapiens MLK7 antisense RNA 1 (MLK7-AS1), long non-coding RNA [NR_033882]                                                                                  |
| A_23_P61050    | 0,006309668 | up   | 1,5196759  | MLKL       | Homo sapiens mixed lineage kinase domain-like (MLKL), transcript variant 1, mRNA [NM_152649]                                                                   |
| A_23_P436353   | 0,003042342 | up   | 1,8923386  | MLLT4      | Homo sapiens myeloid/lymphoid or mixed-lineage leukemia (trithorax homolog, Drosophila); translocated to, 4 (MLLT4), transcript variant 4, mRNA [NM_001291964] |
| A_21_P0004803  | 0,007520729 | up   | 2,4520588  | MLLT4-AS1  | Homo sapiens MLLT4 antisense RNA 1 (head to head) (MLLT4-AS1), long non-coding RNA [NR_027906]                                                                 |
| A_21_P0004591  | 0,01339912  | up   | 1,6700851  | MLLT4-AS1  | Homo sapiens MLLT4 antisense RNA 1 (head to head) (MLLT4-AS1), long non-coding RNA [NR_027906]                                                                 |
| A_32_P98683    | 0,03706403  | up   | 1,5619074  | MLLT6      | Homo sapiens myeloid/lymphoid or mixed-lineage leukemia (trithorax homolog, Drosophila); translocated to, 6 (MLLT6), mRNA [NM_005937]                          |
| A_23_P19529    | 5,31E-04    | down | -2,238329  | MLN        | Homo sapiens motilin (MLN), transcript variant 2, mRNA [NM_001040109]                                                                                          |
| A_23_P165783   | 0,008579084 | up   | 1,9938464  | MLPH       | Homo sapiens melanophilin (MLPH), transcript variant 1, mRNA [NM_024101]                                                                                       |
| A_23_P164148   | 0,011515264 | up   | 1,5282754  | MLX        | Homo sapiens MLX, MAX dimerization protein (MLX), transcript variant 3, mRNA [NM_170607]                                                                       |
| A_23_P9823     | 0,001913563 | up   | 1,8534033  | MLXIP      | Homo sapiens MLX interacting protein (MLXIP), mRNA [NM_014938]                                                                                                 |
| A_33_P3390643  | 0,009352758 | down | -2,150833  | MMACHC     | Homo sapiens methylmalonic aciduria (cobalamin deficiency) cblC type, with homocystinuria (MMACHC), mRNA [NM_015506]                                           |
| A_33_P3221203  | 0,004004173 | up   | 2,487406   | MMP13      | Homo sapiens matrix metalloproteinase 13 (collagenase 3) (MMP13), mRNA [NM_002427]                                                                             |
| A_23_P136413   | 0,013363938 | down | -1,582584  | MMP17      | Homo sapiens matrix metalloproteinase 17 (membrane-inserted) (MMP17), mRNA [NM_016155]                                                                         |
| A_33_P3262124  | 0,010596427 | down | -1,7448127 | MMP25      | Homo sapiens matrix metalloproteinase 25 (MMP25), mRNA [NM_022468]                                                                                             |
| A_23_P150064   | 0,030921496 | down | -2,1384914 | MMRN2      | Homo sapiens multimerin 2 (MMRN2), mRNA [NM_024756]                                                                                                            |
| A_23_P46982    | 0,00389012  | up   | 1,6282198  | MMS19      | Homo sapiens MMS19 nucleotide excision repair homolog (S. cerevisiae) (MMS19), transcript variant 1, mRNA [NM_022362]                                          |
| A_24_P83678    | 0,013596161 | up   | 1,5543054  | MMS22L     | Homo sapiens MMS22-like, DNA repair protein (MMS22L), mRNA [NM_198468]                                                                                         |
| A_32_P95914    | 0,018637527 | up   | 1,6134751  | MMS22L     | Homo sapiens MMS22-like, DNA repair protein (MMS22L), mRNA [NM_198468]                                                                                         |
| A_23_P133123   | 0,002373149 | up   | 1,9124838  | MND1       | Homo sapiens meiotic nuclear divisions 1 homolog (S. cerevisiae) (MND1), transcript variant 1, mRNA [NM_032117]                                                |
| A_23_P341443   | 0,006977398 | up   | 1,6077263  | MNT        | Homo sapiens MAX network transcriptional repressor (MNT), mRNA [NM_020310]                                                                                     |
| A_33_P3347622  | 0,015678398 | down | -1,5132842 | MOB1B      | Homo sapiens MOB kinase activator 1B (MOB1B), transcript variant 3, mRNA [NM_001244767]                                                                        |
| A_23_P130919   | 7,18E-04    | up   | 1,6796283  | MOB3A      | Homo sapiens MOB kinase activator 3A (MOB3A), mRNA [NM_130807]                                                                                                 |
| A_33_P3718014  | 0,014855491 | up   | 2,4699988  | MOBP       | Homo sapiens myelin-associated oligodendrocyte basic protein (MOBP), transcript variant 6, non-coding RNA [NR_103505]                                          |
| A_33_P3391439  | 0,03170417  | up   | 1,6865513  | MOBP       | Homo sapiens myelin-associated oligodendrocyte basic protein (MOBP), transcript variant 6, non-coding RNA [NR_103505]                                          |
| A_23_P109614   | 0,006464911 | up   | 1,7945963  | MOBP       | Homo sapiens myelin-associated oligodendrocyte basic protein (MOBP), transcript variant 3, mRNA [NM_182935]                                                    |
| A_33_P3350202  | 1,21E-04    | down | -2,2234743 | MOCS3      | Homo sapiens molybdenum cofactor synthesis 3 (MOCS3), mRNA [NM_014484]                                                                                         |
| A_33_P3414242  | 0,0011432   | down | -2,440265  | MOG        | Homo sapiens myelin oligodendrocyte glycoprotein (MOG), transcript variant beta2, mRNA [NM_001008229]                                                          |
| A_33_P3353866  | 0,002421997 | down | -2,320081  | MOGAT2     | Homo sapiens monoacylglycerol O-acyltransferase 2 (MOGAT2), mRNA [NM_025098]                                                                                   |
| A_23_P317796   | 4,69E-04    | down | -2,7246964 | MOGAT3     | Homo sapiens monoacylglycerol O-acyltransferase 3 (MOGAT3), transcript variant 1, mRNA [NM_178176]                                                             |
| A_33_P3326984  | 0,023765568 | up   | 1,7533274  | MOK        | MOK protein kinase [Source:HGNC Symbol;Acc:HGNC:9833] [ENST00000520252]                                                                                        |
| A_33_P3308626  | 0,00661672  | down | -2,3428545 | MON1B      | Homo sapiens MON1 secretory trafficking family member B (MON1B), transcript variant 1, mRNA [NM_014940]                                                        |
| A_24_P419028   | 0,006457241 | down | -2,4797826 | MOP-1      | Homo sapiens mRNA for MOP-1, complete cds. [AB014771]                                                                                                          |
| A_24_P100234   | 2,60E-04    | up   | 1,796292   | MORC2      | Homo sapiens MORC family CW-type zinc finger 2 (MORC2), transcript variant 3, mRNA [NM_014941]                                                                 |
| A_32_P122793   | 5,45E-04    | up   | 2,050473   | MORC2-AS1  | Homo sapiens MORC2 antisense RNA 1 (MORC2-AS1), long non-coding RNA [NR_026920]                                                                                |
| A_23_P325501   | 0,004822488 | up   | 1,5546386  | MORC3      | Homo sapiens MORC family CW-type zinc finger 3 (MORC3), mRNA [NM_015358]                                                                                       |
| A_24_P165205   | 9,06E-04    | down | -4,1114454 | MORN1      | Homo sapiens MORN repeat containing 1 (MORN1), transcript variant 1, mRNA [NM_024848]                                                                          |
| A_33_P3308434  | 0,003482816 | down | -1,6105392 | MORN1      | Homo sapiens MORN repeat containing 1 (MORN1), transcript variant 2, mRNA [NM_001301060]                                                                       |
| A_23_P73835    | 0,001923207 | up   | 1,5501475  | MOSPD1     | Homo sapiens motile sperm domain containing 1 (MOSPD1), mRNA [NM_019556]                                                                                       |
| A_24_P231010   | 0,02556332  | up   | 2,4785457  | MOV10L1    | Homo sapiens Mov10 RISC complex RNA helicase like 1 (MOV10L1), transcript variant 1, mRNA [NM_018995]                                                          |
| A_23_P31064    | 0,007477664 | down | -2,7419415 | MOXD1      | Homo sapiens monooxygenase, DBH-like 1 (MOXD1), mRNA [NM_015529]                                                                                               |
| A_33_P3301778  | 0,013726661 | down | -2,774984  | MOXD2P     | Homo sapiens monooxygenase, DBH-like 2, pseudogene (MOXD2P), non-coding RNA [NR_024346]                                                                        |
| A_23_P71598    | 0,002726142 | up   | 2,0989473  | MPDZ       | Homo sapiens multiple PDZ domain protein (MPDZ), transcript variant 1, mRNA [NM_003829]                                                                        |
| A_33_P3212232  | 0,012612782 | up   | 2,5327194  | MPEG1      | Homo sapiens macrophage expressed 1 (MPEG1), mRNA [NM_001039396]                                                                                               |
| A_24_P398500   | 0,033549447 | down | -1,8777893 | MPHOSPH9   | Homo sapiens M-phase phosphoprotein 9 (MPHOSPH9), transcript variant 1, mRNA [NM_022782]                                                                       |
| A_24_P390833   | 0,011031075 | up   | 1,7277579  | MPPE1      | Homo sapiens metallophosphoesterase 1 (MPPE1), transcript variant 1, mRNA [NM_023075]                                                                          |
| A_19_P00317887 | 0,024228279 | up   | 1,9214084  | MPRIIP     | Homo sapiens myosin phosphatase Rho interacting protein (MPRIIP), transcript variant 2, mRNA [NM_201274]                                                       |
| A_19_P00803575 | 5,16E-04    | up   | 3,039543   | MPRIIP     | Homo sapiens myosin phosphatase Rho interacting protein (MPRIIP), transcript variant 2, mRNA [NM_201274]                                                       |
| A_19_P00811812 | 0,019071246 | up   | 1,9129765  | MPRIIP     | Homo sapiens myosin phosphatase Rho interacting protein (MPRIIP), transcript variant 2, mRNA [NM_201274]                                                       |
| A_33_P3230528  | 0,017230224 | up   | 1,9477117  | MPRIIP     | myosin phosphatase Rho interacting protein [Source:HGNC Symbol;Acc:HGNC:30321] [ENST00000395807]                                                               |

|                |                  |                       |                                                                                                                            |
|----------------|------------------|-----------------------|----------------------------------------------------------------------------------------------------------------------------|
| A_23_P15348    | 0,00136183 up    | 2,2845612 MPRIP       | Homo sapiens myosin phosphatase Rho interacting protein (MPRIP), transcript variant 1, mRNA [NM_015134]                    |
| A_23_P357351   | 0,003569885 down | -1,8905705 MPV17L     | Homo sapiens MPV17 mitochondrial membrane protein-like (MPV17L), transcript variant 2, mRNA [NM_173803]                    |
| A_23_P165130   | 0,001454862 down | -1,5287973 MPV17L2    | Homo sapiens MPV17 mitochondrial membrane protein-like 2 (MPV17L2), mRNA [NM_032683]                                       |
| A_23_P138089   | 2,99E-04 down    | -2,2869017 MPZ        | Homo sapiens myelin protein zero (MPZ), mRNA [NM_000530]                                                                   |
| A_24_P126210   | 0,011105979 up   | 2,0579045 MRAP        | Homo sapiens melanocortin 2 receptor accessory protein (MRAP), transcript variant 1, mRNA [NM_178817]                      |
| A_33_P3303176  | 0,004048911 down | -1,5862625 MRGPRG     | Homo sapiens MAS-related GPR, member G (MRGPRG), mRNA [NM_001164377]                                                       |
| A_23_P365725   | 0,001653301 down | -1,9150255 MRGPRX1    | Homo sapiens MAS-related GPR, member X1 (MRGPRX1), mRNA [NM_147199]                                                        |
| A_21_P0014055  | 0,006977658 up   | 1,7973994 MROH1       | Homo sapiens maestro heat-like repeat family member 1 (MROH1), transcript variant 4, mRNA [NM_001288814]                   |
| A_23_P407080   | 0,002028554 up   | 2,174302 MROH2B       | Homo sapiens maestro heat-like repeat family member 2B (MROH2B), mRNA [NM_173489]                                          |
| A_33_P3227686  | 1,76E-06 down    | -4,0350814 MROH5      | Homo sapiens maestro heat-like repeat family member 5 (MROH5), transcript variant 1, mRNA [NM_207414]                      |
| A_21_P0007310  | 0,004111955 down | -2,6106217 MRPL23-AS1 | Homo sapiens MRPL23 antisense RNA 1 (MRPL23-AS1), long non-coding RNA [NR_024471]                                          |
| A_33_P3410259  | 0,021648256 up   | 1,6411436 MRPL23-AS1  | Homo sapiens MRPL23 antisense RNA 1 (MRPL23-AS1), long non-coding RNA [NR_024471]                                          |
| A_33_P3304252  | 2,37E-04 up      | 1,7480198 MRPL32      | Homo sapiens mitochondrial ribosomal protein L32 (MRPL32), mRNA [NM_031903]                                                |
| A_32_P16489    | 0,001954969 up   | 1,5613405 MRPL35      | Homo sapiens mitochondrial ribosomal protein L35 (MRPL35), transcript variant 2, mRNA [NM_145644]                          |
| A_33_P3316233  | 0,012672559 down | -2,088455 MRPS18C     | Homo sapiens mitochondrial ribosomal protein S18C (MRPS18C), transcript variant 1, mRNA [NM_016067]                        |
| A_21_P0011187  | 0,001542367 down | -1,7500587 MRPS31P5   | Homo sapiens mitochondrial ribosomal protein S31 pseudogene 5 (MRPS31P5), transcript variant 1, non-coding RNA [NR_002816] |
| A_21_P0011186  | 0,004924431 down | -2,0679207 MRPS31P5   | mitochondrial ribosomal protein S31 pseudogene 5 [Source:HGNC Symbol;Acc:HGNC:39253] [ENST00000606619]                     |
| A_33_P3255814  | 0,00120186 up    | 1,5465524 MRS2        | Homo sapiens MRS2 magnesium transporter (MRS2), transcript variant 1, mRNA [NM_001286264]                                  |
| A_33_P3290577  | 0,02732534 down  | -2,1473665 MS4A14     | Homo sapiens membrane-spanning 4-domains, subfamily A, member 14 (MS4A14), transcript variant 4, mRNA [NM_001261828]       |
| A_33_P3402257  | 0,004964944 down | -5,3955584 MS4A18     | PREDICTED: Homo sapiens membrane-spanning 4-domains, subfamily A, member 18 (MS4A18), mRNA [XM_006709948]                  |
| A_33_P3295313  | 1,24E-04 down    | -2,3610694 MS4A2      | Homo sapiens membrane-spanning 4-domains, subfamily A, member 2 (MS4A2), transcript variant 1, mRNA [NM_000139]            |
| A_23_P104972   | 1,70E-04 down    | -2,050914 MS4A5       | Homo sapiens membrane-spanning 4-domains, subfamily A, member 5 (MS4A5), mRNA [NM_023945]                                  |
| A_23_P139146   | 0,018656688 up   | 1,6567833 MS4A8       | Homo sapiens membrane-spanning 4-domains, subfamily A, member 8 (MS4A8), mRNA [NM_031457]                                  |
| A_33_P3418798  | 0,005807373 down | -1,5711458 MSANTD1    | Homo sapiens Myb/SANT-like DNA-binding domain containing 1 (MSANTD1), mRNA [NM_001042690]                                  |
| A_23_P52885    | 0,001690496 up   | 1,846882 MSANTD2      | Homo sapiens Myb/SANT-like DNA-binding domain containing 2 (MSANTD2), transcript variant 1, mRNA [NM_024631]               |
| A_21_P0011802  | 5,11E-04 down    | -1,9990914 MSH6       | mutS homolog 6 [Source:HGNC Symbol;Acc:HGNC:7329] [ENST00000454137]                                                        |
| A_23_P132438   | 2,86E-04 up      | 1,7242018 MSL2        | Homo sapiens male-specific lethal 2 homolog (Drosophila) (MSL2), transcript variant 1, mRNA [NM_018133]                    |
| A_19_P00801279 | 2,42E-04 down    | -3,2195396 MSN        | moesin [Source:HGNC Symbol;Acc:HGNC:7373] [ENST00000429601]                                                                |
| A_21_P0010521  | 0,048516165 down | -1,9153457 MST1       | macrophage stimulating 1 (hepatocyte growth factor-like) [Source:HGNC Symbol;Acc:HGNC:7380] [ENST00000481055]              |
| A_21_P0010517  | 0,023180293 down | -1,8026766 MST1       | macrophage stimulating 1 (hepatocyte growth factor-like) [Source:HGNC Symbol;Acc:HGNC:7380] [ENST00000490966]              |
| A_33_P3256550  | 0,001982672 down | -2,2743616 MST152     | Homo sapiens MSTP152 (MST152) mRNA, complete cds. [AF190155]                                                               |
| A_21_P0010692  | 0,018854633 down | -1,5109818 MST1P2     | Homo sapiens macrophage stimulating 1 (hepatocyte growth factor-like) pseudogene 2 (MST1P2), non-coding RNA [NR_027504]    |
| A_33_P3351934  | 0,002086713 down | -1,709015 MSTO1       | Homo sapiens misato homolog 1 (Drosophila), mRNA (cDNA clone IMAGE:4828998). [BC070067]                                    |
| A_24_P132008   | 5,24E-04 down    | -2,3607066 MSX2       | Homo sapiens msh homeobox 2 (MSX2), mRNA [NM_002449]                                                                       |
| A_23_P54840    | 0,045061547 up   | 1,9189141 MT1A        | Homo sapiens metallothionein 1A (MT1A), mRNA [NM_005946]                                                                   |
| A_33_P3780505  | 0,004210844 up   | 1,5617253 MT1DP       | Homo sapiens metallothionein 1D, pseudogene (functional) (MT1DP), transcript variant 1, non-coding RNA [NR_003658]         |
| A_23_P420942   | 0,015363483 up   | 2,442063 MT1E         | PREDICTED: Homo sapiens metallothionein 1E (MT1E), transcript variant X1, mRNA [XM_005255956]                              |
| A_21_P0000671  | 0,016916355 up   | 2,0678828 MT1E        | Homo sapiens metallothionein 1E (MT1E), mRNA [NM_175617]                                                                   |
| A_33_P3315314  | 0,01369161 up    | 2,364064 MT1HL1       | Homo sapiens metallothionein 1H-like 1 (MT1HL1), mRNA [NM_001276687]                                                       |
| A_33_P3236868  | 0,03354789 up    | 1,7321408 MT1X        | Homo sapiens metallothionein 1X (MT1X), mRNA [NM_005952]                                                                   |
| A_23_P97195    | 6,49E-04 up      | 1,6560745 MTFR1L      | Homo sapiens mitochondrial fission regulator 1-like (MTFR1L), transcript variant 1, mRNA [NM_019557]                       |
| A_24_P382630   | 0,026771845 down | -1,5056959 MTG2       | Homo sapiens mitochondrial ribosome-associated GTPase 2 (MTG2), mRNA [NM_015666]                                           |
| A_23_P161507   | 0,025734615 up   | 1,8815855 MTL5        | Homo sapiens metallothionein-like 5, testis-specific (tesmin) (MTL5), transcript variant 1, mRNA [NM_004923]               |
| A_23_P73530    | 1,85E-05 up      | 2,0140069 MTMR1       | Homo sapiens myotubularin related protein 1 (MTMR1), mRNA [NM_003828]                                                      |
| A_23_P127418   | 0,01296101 up    | 2,4161127 MTNR1B      | Homo sapiens melatonin receptor 1B (MTNR1B), mRNA [NM_005959]                                                              |
| A_21_P0000102  | 0,015824515 down | -1,5537988 MTRNR2L2   | Homo sapiens MT-RNR2-like 2 (MTRNR2L2), mRNA [NM_001190470]                                                                |
| A_21_P0003137  | 6,50E-04 down    | -1,6873052 MTRNR2L2   | Homo sapiens MT-RNR2-like 2 (MTRNR2L2), mRNA [NM_001190470]                                                                |
| A_21_P0000104  | 0,002941521 down | -2,8835225 MTRNR2L4   | Homo sapiens MT-RNR2-like 4 (MTRNR2L4), mRNA [NM_001190476]                                                                |
| A_21_P0000109  | 0,001559489 down | -2,458362 MTRNR2L9    | Homo sapiens MT-RNR2-like 9 (pseudogene) (MTRNR2L9), mRNA [NM_001190706]                                                   |
| A_23_P347632   | 0,007445417 up   | 1,8250667 MTSS1       | Homo sapiens metastasis suppressor 1 (MTSS1), transcript variant 2, mRNA [NM_014751]                                       |
| A_33_P3354256  | 0,042932354 up   | 1,6628829 MTSS1       | Homo sapiens metastasis suppressor 1 (MTSS1), transcript variant 1, mRNA [NM_001282971]                                    |
| A_23_P403745   | 0,015737431 up   | 1,8079444 MTSSL1      | Homo sapiens metastasis suppressor 1-like (MTSSL1), mRNA [NM_138383]                                                       |
| A_33_P3356846  | 0,01568203 down  | -1,5823991 MTX3       | Homo sapiens metaxin 3 (MTX3), transcript variant 2, mRNA [NM_001010891]                                                   |
| A_23_P137856   | 0,033491045 up   | 2,250113 MUC1         | Homo sapiens mucin 1, cell surface associated (MUC1), transcript variant 1, mRNA [NM_002456]                               |
| A_33_P3352038  | 0,018443268 up   | 1,7946509 MUC12       | Homo sapiens mucin 12, cell surface associated (MUC12), mRNA [NM_001164462]                                                |
| A_21_P0014035  | 0,001519333 up   | 1,8026568 MUC19       | Homo sapiens mucin 19, oligomeric (MUC19), mRNA [NM_173600]                                                                |
| A_23_P256784   | 4,67E-06 down    | -2,5710428 MUC2       | Homo sapiens mucin 2, oligomeric mucus/gel-forming (MUC2), mRNA [NM_002457]                                                |
| A_33_P3226775  | 0,003156152 up   | 2,1462955 MUC20       | Homo sapiens mucin 20, cell surface associated (MUC20), transcript variant S, mRNA [NM_001098516]                          |
| A_33_P3275035  | 0,001146135 up   | 6,4944553 MUC21       | mucin-21 precursor [Source:RefSeq peptide;Acc:NP_001010909] [ENST00000551904]                                              |
| A_21_P0004641  | 2,94E-07 down    | -4,0721626 MUC22      | Homo sapiens mucin 22 (MUC22), mRNA [NM_001198815]                                                                         |
| A_33_P3236902  | 1,56E-04 down    | -2,4708188 MUC3A      | Homo sapiens mucin 3A, cell surface associated (MUC3A), mRNA [NM_005960]                                                   |

|               |              |      |            |          |                                                                                                                         |
|---------------|--------------|------|------------|----------|-------------------------------------------------------------------------------------------------------------------------|
| A_23_P313278  | 2,47E-06     | down | -3,7260416 | MUC3A    | Homo sapiens MUC3A mRNA for intestinal mucin, partial cds. [AB038784]                                                   |
| A_33_P3331752 | 0,009544668  | down | -2,3752792 | MUC3A    | Homo sapiens mucin 3A, cell surface associated (MUC3A), mRNA [NM_005960]                                                |
| A_24_P208825  | 0,001948918  | up   | 2,7457297  | MUC4     | Homo sapiens mucin 4, cell surface associated (MUC4), transcript variant 1, mRNA [NM_018406]                            |
| A_24_P917886  | 0,03567067   | down | -1,8528497 | MUC5AC   | PREDICTED: Homo sapiens mucin 5AC, oligomeric mucus/gel-forming (MUC5AC), partial mRNA [XM_006709947]                   |
| A_33_P3314500 | 0,00168808   | down | -2,3630898 | MUC6     | Homo sapiens mucin 6, oligomeric mucus/gel-forming (MUC6), mRNA [NM_005961]                                             |
| A_24_P88079   | 0,028105382  | down | -2,2698305 | MUC6     | Homo sapiens mucin 6, oligomeric mucus/gel-forming (MUC6), mRNA [NM_005961]                                             |
| A_23_P161634  | 0,001427964  | up   | 1,5634254  | MUS81    | Homo sapiens MUS81 structure-specific endonuclease subunit (MUS81), mRNA [NM_025128]                                    |
| A_33_P3230788 | 6,73E-04     | down | -2,6201136 | MUSK     | muscle, skeletal, receptor tyrosine kinase [Source:HGNC Symbol;Acc:HGNC:7525] [ENST00000374439]                         |
| A_23_P71649   | 0,012849936  | down | -1,946675  | MUSK     | Homo sapiens muscle, skeletal, receptor tyrosine kinase (MUSK), transcript variant 1, mRNA [NM_005592]                  |
| A_23_P152125  | 0,03000515   | down | -1,5058655 | MVD      | Homo sapiens mevalonate (diphospho) decarboxylase (MVD), mRNA [NM_002461]                                               |
| A_23_P161399  | 0,016381186  | up   | 1,675401   | MXI1     | Homo sapiens MAX interactor 1, dimerization protein (MXI1), transcript variant 2, mRNA [NM_130439]                      |
| A_24_P134195  | 0,035933394  | up   | 1,58576    | MYADM    | Homo sapiens myeloid-associated differentiation marker (MYADM), transcript variant 1, mRNA [NM_001020818]               |
| A_33_P3354703 | 0,026728408  | up   | 1,8965278  | MYADML   | Homo sapiens myeloid-associated differentiation marker-like (pseudogene) (MYADML), non-coding RNA [NR_003143]           |
| A_24_P110331  | 0,021348467  | up   | 2,2610419  | MYADML2  | Homo sapiens myeloid-associated differentiation marker-like 2 (MYADML2), mRNA [NM_001145113]                            |
| A_23_P143190  | 0,009680659  | down | -2,3747523 | MYBL2    | Homo sapiens v-myb avian myeloblastosis viral oncogene homolog-like 2 (MYBL2), transcript variant 1, mRNA [NM_002466]   |
| A_23_P128362  | 0,0019101294 | up   | 2,9619708  | MYBPC1   | Homo sapiens myosin binding protein C, slow type (MYBPC1), transcript variant 2, mRNA [NM_206819]                       |
| A_23_P215956  | 0,006527643  | up   | 1,7077779  | MYC      | Homo sapiens v-myc avian myelocytomatosis viral oncogene homolog (MYC), mRNA [NM_002467]                                |
| A_23_P67952   | 4,03E-04     | down | -2,131788  | MYCNOS   | Homo sapiens MYCN opposite strand (MYCNOS), transcript variant 2, long non-coding RNA [NR_026766]                       |
| A_21_P0002574 | 9,75E-05     | down | -2,601155  | MYCNUT   | Homo sapiens MYCN upstream transcript (non-protein coding) (MYCNUT), long non-coding RNA [NR_125783]                    |
| A_21_P0001830 | 0,03766443   | up   | 2,6764069  | MYCNUT   | Homo sapiens MYCN upstream transcript (non-protein coding) (MYCNUT), long non-coding RNA [NR_125783]                    |
| A_23_P76460   | 0,025056493  | down | -2,0821393 | MYF6     | Homo sapiens myogenic factor 6 (herculin) (MYF6), mRNA [NM_002469]                                                      |
| A_23_P206920  | 0,001735333  | up   | 2,8108711  | MYH11    | Homo sapiens myosin, heavy chain 11, smooth muscle (MYH11), transcript variant SM1B, mRNA [NM_001040114]                |
| A_23_P89334   | 0,03966881   | up   | 2,2639663  | MYH13    | Homo sapiens myosin, heavy chain 13, skeletal muscle (MYH13), mRNA [NM_003802]                                          |
| A_24_P323545  | 7,87E-05     | down | -2,9340646 | MYH14    | Homo sapiens myosin, heavy chain 14, non-muscle (MYH14), transcript variant 1, mRNA [NM_001077186]                      |
| A_23_P66530   | 0,009032233  | up   | 1,7220699  | MYH4     | Homo sapiens myosin, heavy chain 4, skeletal muscle (MYH4), mRNA [NM_017533]                                            |
| A_21_P0013396 | 0,008437656  | up   | 1,8822068  | MYH6     | Homo sapiens myosin, heavy chain 6, cardiac muscle, alpha (MYH6), mRNA [NM_002471]                                      |
| A_24_P408424  | 0,047443025  | up   | 1,8105723  | MYH9     | Homo sapiens myosin, heavy chain 9, non-muscle (MYH9), mRNA [NM_002473]                                                 |
| A_23_P393015  | 0,008702905  | up   | 2,471978   | MYL10    | Homo sapiens myosin, light chain 10, regulatory (MYL10), mRNA [NM_138403]                                               |
| A_23_P59738   | 0,002927366  | down | -1,8630004 | MYL7     | Homo sapiens myosin, light chain 7, regulatory (MYL7), mRNA [NM_021223]                                                 |
| A_23_P143817  | 0,025058301  | down | -2,069211  | MYLK     | Homo sapiens myosin light chain kinase (MYLK), transcript variant 1, mRNA [NM_053025]                                   |
| A_24_P319923  | 0,03428257   | down | -2,2214272 | MYLK     | Homo sapiens myosin light chain kinase (MYLK), transcript variant 1, mRNA [NM_053025]                                   |
| A_23_P80008   | 0,038759314  | down | -1,5519135 | MYLK2    | Homo sapiens myosin light chain kinase 2 (MYLK2), mRNA [NM_033118]                                                      |
| A_33_P3300217 | 0,003170568  | down | -2,0050418 | MYLK3    | Homo sapiens myosin light chain kinase 3 (MYLK3), mRNA [NM_182493]                                                      |
| A_24_P195669  | 0,035682242  | up   | 1,714218   | MYO15B   | myosin XVB pseudogene [Source:HGNC Symbol;Acc:HGNC:14083] [ENST00000581866]                                             |
| A_23_P162288  | 2,63E-04     | down | -2,5615146 | MYO1A    | Homo sapiens myosin IA (MYO1A), transcript variant 2, mRNA [NM_005379]                                                  |
| A_24_P7143    | 0,001319849  | down | -1,8134135 | MYO1B    | Homo sapiens myosin IB (MYO1B), transcript variant 2, mRNA [NM_012223]                                                  |
| A_33_P3297978 | 0,002334527  | up   | 1,9452218  | MYO1E    | Homo sapiens myosin IE (MYO1E), mRNA [NM_004998]                                                                        |
| A_24_P206343  | 0,013487754  | down | -1,8169161 | MYO1G    | Homo sapiens myosin IG (MYO1G), mRNA [NM_033054]                                                                        |
| A_23_P86411   | 5,30E-04     | down | -12,323614 | MYO3A    | Homo sapiens myosin IIIA (MYO3A), mRNA [NM_017433]                                                                      |
| A_33_P3351617 | 0,003282587  | up   | 1,5235124  | MYO3A    | myosin IIIA [Source:HGNC Symbol;Acc:HGNC:7601] [ENST00000376302]                                                        |
| A_24_P182696  | 0,003192708  | up   | 1,800706   | MYO3B    | Homo sapiens myosin IIIB (MYO3B), transcript variant 2, mRNA [NM_138995]                                                |
| A_24_P255218  | 0,009917685  | down | -1,5152389 | MYO5A    | Homo sapiens myosin VA (heavy chain 12, myoxin) (MYO5A), transcript variant 1, mRNA [NM_000259]                         |
| A_23_P140434  | 0,042948928  | up   | 1,7287023  | MYO5C    | Homo sapiens myosin VC (MYO5C), mRNA [NM_018728]                                                                        |
| A_23_P209799  | 0,03066883   | down | -1,7837999 | MYO7B    | Homo sapiens myosin VIIB (MYO7B), mRNA [NM_001080527]                                                                   |
| A_23_P205841  | 1,20E-04     | up   | 1,7710788  | MYO9A    | Homo sapiens myosin IXA (MYO9A), mRNA [NM_006901]                                                                       |
| A_24_P246173  | 0,023108976  | up   | 1,5593519  | MYO9B    | Homo sapiens myosin IXB (MYO9B), transcript variant 1, mRNA [NM_004145]                                                 |
| A_33_P3334773 | 0,036099665  | down | -2,1809733 | MYOD1    | Homo sapiens myogenic differentiation 1 (MYOD1), mRNA [NM_002478]                                                       |
| A_23_P1320    | 0,037886802  | up   | 2,3622386  | MYOZ1    | Homo sapiens myozenin 1 (MYOZ1), mRNA [NM_021245]                                                                       |
| A_23_P75790   | 1,13E-04     | down | -2,1697874 | MYRF     | Homo sapiens myelin regulatory factor (MYRF), transcript variant 1, mRNA [NM_013279]                                    |
| A_23_P210835  | 0,016813977  | up   | 2,4232779  | MYT1     | Homo sapiens myelin transcription factor 1 (MYT1), mRNA [NM_004535]                                                     |
| A_33_P3351290 | 0,002003248  | down | -4,2394276 | MZB1     | marginal zone B and B1 cell-specific protein [Source:HGNC Symbol;Acc:HGNC:30125] [ENST00000509591]                      |
| A_24_P140666  | 0,012045578  | up   | 2,3837895  | N4BP3    | Homo sapiens NEDD4 binding protein 3 (N4BP3), mRNA [NM_015111]                                                          |
| A_23_P251785  | 0,017950911  | up   | 1,5032552  | NAA16    | Homo sapiens N(alpha)-acetyltransferase 16, NatA auxiliary subunit (NAA16), transcript variant 1, mRNA [NM_024561]      |
| A_24_P66679   | 0,030297631  | up   | 1,5428978  | NAA30    | Homo sapiens N(alpha)-acetyltransferase 30, NatC catalytic subunit (NAA30), mRNA [NM_001011713]                         |
| A_23_P38206   | 0,00798504   | up   | 2,6496568  | NAA38    | Homo sapiens N(alpha)-acetyltransferase 38, NatC auxiliary subunit (NAA38), mRNA [NM_032356]                            |
| A_33_P3273854 | 0,005689734  | down | -1,8182738 | NAALADL2 | Homo sapiens N-acetylated alpha-linked acidic dipeptidase-like 2 (NAALADL2), mRNA [NM_207015]                           |
| A_21_P0003061 | 3,08E-05     | down | -3,2124703 | NAALADL2 | N-acetylated alpha-linked acidic dipeptidase-like 2 [Source:HGNC Symbol;Acc:HGNC:23219] [ENST00000481679]               |
| A_33_P3269631 | 4,24E-06     | down | -3,1281722 | NAALADL2 | N-acetylated alpha-linked acidic dipeptidase-like 2 [Source:HGNC Symbol;Acc:HGNC:23219] [ENST00000495900]               |
| A_21_P0002709 | 0,013174832  | up   | 1,571184   | NAALADL2 | N-acetylated alpha-linked acidic dipeptidase-like 2 [Source:HGNC Symbol;Acc:HGNC:23219] [ENST00000491329]               |
| A_23_P59888   | 0,015714463  | down | -2,9707885 | NACAP1   | Homo sapiens nascent-polypeptide-associated complex alpha polypeptide pseudogene 1 (NACAP1), non-coding RNA [NR_002182] |
| A_23_P200056  | 0,013418793  | up   | 1,5280752  | NADK     | Homo sapiens NAD kinase (NADK), transcript variant 1, mRNA [NM_023018]                                                  |

|                |                  |                       |                                                                                                                             |
|----------------|------------------|-----------------------|-----------------------------------------------------------------------------------------------------------------------------|
| A_33_P3233649  | 2,58E-04 down    | -1,820731 NADK2       | Homo sapiens NAD kinase 2, mitochondrial (NADK2), transcript variant 1, mRNA [NM_001085411]                                 |
| A_24_P408457   | 0,001723348 up   | 1,7763001 NAGA        | Homo sapiens N-acetylgalactosaminidase, alpha- (NAGA), mRNA [NM_000262]                                                     |
| A_33_P3269159  | 8,09E-04 down    | -2,6755955 NALCN      | sodium leak channel, non-selective [Source:HGNC Symbol;Acc:HGNC:19082] [ENST00000470333]                                    |
| A_33_P3364869  | 0,03938168 up    | 1,5717431 NAMPT       | Homo sapiens cDNA FLJ13279 fis, clone OVARC1001055, moderately similar to PRE-B CELL ENHANCING FACTOR PRECURSOR. [AK023341] |
| A_33_P3388453  | 0,0346105 down   | -1,5534446 NANOS2     | Homo sapiens nanos homolog 2 (Drosophila) (NANOS2), mRNA [NM_001029861]                                                     |
| A_24_P132950   | 1,81E-04 up      | 2,2192233 NAP1L4      | Homo sapiens nucleosome assembly protein 1-like 4 (NAP1L4), mRNA [NM_005969]                                                |
| A_23_P144369   | 4,74E-04 down    | -2,9375165 NAP1L5     | Homo sapiens nucleosome assembly protein 1-like 5 (NAP1L5), mRNA [NM_153757]                                                |
| A_23_P90130    | 0,022546481 down | -1,6918042 NAPSA      | Homo sapiens napsin A aspartic peptidase (NAPSA), mRNA [NM_004851]                                                          |
| A_19_P00811284 | 0,002538711 down | -2,5038776 NASP       | Homo sapiens nuclear autoantigenic sperm protein (histone-binding) (NASP), transcript variant 2, mRNA [NM_002482]           |
| A_23_P31798    | 4,56E-04 down    | -2,052926 NAT2        | Homo sapiens N-acetyltransferase 2 (arylamine N-acetyltransferase) (NAT2), mRNA [NM_000015]                                 |
| A_24_P308506   | 2,97E-04 down    | -4,1338882 NAT8B      | Homo sapiens N-acetyltransferase 8B (GCN5-related, putative, gene/pseudogene) (NAT8B), mRNA [NM_016347]                     |
| A_33_P3885807  | 0,029832877 up   | 2,16845 NAV2-AS5      | Homo sapiens NAV2 antisense RNA 5 (NAV2-AS5), long non-coding RNA [NR_049725]                                               |
| A_33_P3336273  | 0,001017289 down | -3,477483 NAV3        | Homo sapiens neuron navigator 3 (NAV3), transcript variant 1, mRNA [NM_001024383]                                           |
| A_19_P00322653 | 0,03376436 down  | -1,5001124 NBAT1      | Homo sapiens neuroblastoma associated transcript 1 (NBAT1), long non-coding RNA [NR_034143]                                 |
| A_24_P272160   | 0,005362199 down | -1,9399726 NBEAL2     | PREDICTED: Homo sapiens neurobeachin-like 2 (NBEAL2), transcript variant X5, mRNA [XM_006713072]                            |
| A_24_P278126   | 0,035867598 up   | 1,5225801 NBN         | Homo sapiens nibrin (NBN), mRNA [NM_002485]                                                                                 |
| A_33_P3368800  | 0,003929 up      | 1,5129112 NBPF12      | Homo sapiens neuroblastoma breakpoint family, member 12 (NBPF12), mRNA [NM_001278141]                                       |
| A_23_P359430   | 4,45E-05 up      | 1,9607549 NBPF14      | Homo sapiens neuroblastoma breakpoint family, member 14 (NBPF14), mRNA [NM_015383]                                          |
| A_33_P3229328  | 0,037570205 down | -1,5957004 NBPF6      | Homo sapiens neuroblastoma breakpoint family, member 6 (NBPF6), transcript variant 2, mRNA [NM_001143988]                   |
| A_33_P3279162  | 1,05E-04 down    | -2,4012783 NBPF6      | Homo sapiens neuroblastoma breakpoint family, member 6 (NBPF6), transcript variant 1, mRNA [NM_001143987]                   |
| A_33_P3279167  | 0,034026597 up   | 2,3573923 NBPF7       | Homo sapiens neuroblastoma breakpoint family, member 7 (NBPF7), mRNA [NM_001047980]                                         |
| A_23_P153797   | 6,87E-05 down    | -2,359089 NCAN        | Homo sapiens neurocan (NCAN), mRNA [NM_004386]                                                                              |
| A_32_P71447    | 0,002607989 up   | 1,6109287 NCAPD3      | Homo sapiens non-SMC condensin II complex, subunit D3 (NCAPD3), mRNA [NM_015261]                                            |
| A_33_P3659876  | 0,018900212 up   | 1,9627743 NCAPG2      | Homo sapiens non-SMC condensin II complex, subunit G2 (NCAPG2), transcript variant 2, mRNA [NM_001281932]                   |
| A_23_P138194   | 0,004033855 down | -1,7657692 NCF2       | Homo sapiens neutrophil cytosolic factor 2 (NCF2), transcript variant 1, mRNA [NM_000433]                                   |
| A_23_P73239    | 0,009923887 up   | 1,5089098 NCKAP1      | Homo sapiens NCK-associated protein 1 (NCKAP1), transcript variant 2, mRNA [NM_205842]                                      |
| A_23_P360079   | 0,026163474 down | -2,1442404 NCKAP5     | Homo sapiens NCK-associated protein 5 (NCKAP5), transcript variant 1, mRNA [NM_207363]                                      |
| A_33_P3211198  | 0,020378586 up   | 2,657094 NCMAP        | Homo sapiens noncompact myelin associated protein (NCMAP), mRNA [NM_001010980]                                              |
| A_33_P3270009  | 0,013990724 up   | 1,7548628 NCOA1       | Homo sapiens nuclear receptor coactivator 1 (NCOA1), transcript variant 2, mRNA [NM_147223]                                 |
| A_23_P120442   | 3,45E-06 up      | 2,3146632 NCOA3       | Homo sapiens nuclear receptor coactivator 3 (NCOA3), transcript variant 1, mRNA [NM_181659]                                 |
| A_23_P210515   | 4,56E-04 up      | 2,0261898 NCOA5       | Homo sapiens nuclear receptor coactivator 5 (NCOA5), mRNA [NM_020967]                                                       |
| A_24_P237661   | 0,005510134 down | -2,3107212 NCOR1      | Homo sapiens nuclear receptor corepressor 1 (NCOR1), transcript variant 2, mRNA [NM_001190438]                              |
| A_33_P3571824  | 0,017173065 down | -1,6457217 NCR1       | Homo sapiens natural cytotoxicity triggering receptor 1 (NCR1), transcript variant 1, mRNA [NM_004829]                      |
| A_33_P3329063  | 0,00876898 up    | 2,9441502 NCR1        | Homo sapiens natural cytotoxicity triggering receptor 1 (NCR1), transcript variant 1, mRNA [NM_004829]                      |
| A_33_P3344423  | 0,015026493 down | -2,2144315 NCR3       | Homo sapiens natural cytotoxicity triggering receptor 3 (NCR3), transcript variant 3, mRNA [NM_001145467]                   |
| A_23_P251881   | 0,0266625 up     | 1,5593257 NCR3        | Homo sapiens natural cytotoxicity triggering receptor 3 (NCR3), transcript variant 1, mRNA [NM_147130]                      |
| A_21_P0005720  | 0,003437661 down | -2,6269855 NCRNA00249 | PREDICTED: Homo sapiens uncharacterized LOC101926947 (NCRNA00249), transcript variant X4, ncRNA [XR_426332]                 |
| A_21_P0005941  | 7,97E-04 down    | -4,310279 NCRNA00249  | PREDICTED: Homo sapiens uncharacterized LOC101926947 (NCRNA00249), transcript variant X6, ncRNA [XR_426334]                 |
| A_21_P0005954  | 0,012923341 up   | 1,5654821 NCRNA00250  | Homo sapiens non-protein coding RNA 250 (NCRNA00250), long non-coding RNA [NR_126028]                                       |
| A_24_P182122   | 0,006851737 up   | 1,6987934 ND1         | mitochondrially encoded NADH dehydrogenase 1 [Source:HGNC Symbol;Acc:HGNC:7455] [ENST00000361390]                           |
| A_23_P431853   | 0,002769837 up   | 1,6081934 ND2         | mitochondrially encoded NADH dehydrogenase 2 [Source:HGNC Symbol;Acc:HGNC:7456] [ENST00000361453]                           |
| A_23_P406928   | 0,003309238 up   | 1,7042087 ND5         | mitochondrially encoded NADH dehydrogenase 5 [Source:HGNC Symbol;Acc:HGNC:7461] [ENST00000361567]                           |
| A_23_P317056   | 7,15E-04 down    | -2,0310848 ND6        | mitochondrially encoded NADH dehydrogenase 6 [Source:HGNC Symbol;Acc:HGNC:7462] [ENST00000361681]                           |
| A_24_P185604   | 0,01608457 up    | 1,8107717 NDRG3       | Homo sapiens NDRG family member 3 (NDRG3), transcript variant 1, mRNA [NM_032013]                                           |
| A_21_P0014051  | 0,021705482 down | -1,8673599 NDUFA6-AS1 | Homo sapiens NDUFA6 antisense RNA 1 (head to head) (NDUFA6-AS1), long non-coding RNA [NR_034118]                            |
| A_33_P3440264  | 0,030728243 down | -1,5836536 NDUFA6-AS1 | Homo sapiens NDUFA6 antisense RNA 1 (head to head) (NDUFA6-AS1), long non-coding RNA [NR_034118]                            |
| A_32_P93328    | 0,011637275 down | -2,349616 NDUFB2-AS1  | Homo sapiens NDUFB2 antisense RNA 1 (NDUFB2-AS1), long non-coding RNA [NR_024454]                                           |
| A_32_P103614   | 0,007229638 down | -2,2269628 NEBL-AS1   | Homo sapiens NEBL antisense RNA 1 (NEBL-AS1), transcript variant 1, long non-coding RNA [NR_046283]                         |
| A_33_P3247629  | 0,002574228 down | -1,6961678 NECAP1     | Homo sapiens NECAP endocytosis associated 1 (NECAP1), transcript variant 1, mRNA [NM_015509]                                |
| A_32_P144920   | 0,016973576 up   | 1,8109 NECAP1         | Homo sapiens NECAP endocytosis associated 1 (NECAP1), transcript variant 1, mRNA [NM_015509]                                |
| A_21_P0014167  | 0,024223035 down | -2,4402568 NEDD9      | neural precursor cell expressed, developmentally down-regulated 9 [Source:HGNC Symbol;Acc:HGNC:7733] [ENST00000379433]      |
| A_33_P3408152  | 0,03880187 up    | 1,9315583 NEFH        | Homo sapiens neurofilament, heavy polypeptide (NEFH), mRNA [NM_021076]                                                      |
| A_33_P3341970  | 0,001092668 down | -2,1198213 NEGR1      | Homo sapiens neuronal growth regulator 1 (NEGR1), mRNA [NM_173808]                                                          |
| A_23_P129157   | 0,015869478 up   | 1,7004247 NEIL1       | Homo sapiens nei endonuclease VIII-like 1 (E. coli) (NEIL1), transcript variant 2, mRNA [NM_024608]                         |
| A_23_P155301   | 0,00247403 down  | -1,7221266 NEK11      | Homo sapiens NIMA-related kinase 11 (NEK11), transcript variant 2, mRNA [NM_145910]                                         |
| A_33_P3354203  | 0,010914825 down | -2,0274506 NELL1      | NEL-like 1 (chicken) [Source:HGNC Symbol;Acc:HGNC:7750] [ENST00000534263]                                                   |
| A_33_P3651948  | 2,78E-06 down    | -5,6157737 NEO1       | Homo sapiens neogenin 1 (NEO1), transcript variant 1, mRNA [NM_002499]                                                      |
| A_33_P3358233  | 0,015215811 down | -1,7082175 NES        | Homo sapiens nestin (NES), mRNA [NM_006617]                                                                                 |
| A_23_P83931    | 0,000473439 up   | 1,7759846 NET1        | Homo sapiens neuroepithelial cell transforming 1 (NET1), transcript variant 1, mRNA [NM_001047160]                          |
| A_33_P3210085  | 0,003138731 up   | 2,3310716 NET1        | Homo sapiens neuroepithelial cell transforming 1 (NET1), transcript variant 1, mRNA [NM_001047160]                          |
| A_23_P4489     | 0,014171049 down | -2,248982 NETO1       | Homo sapiens neuropilin (NRP) and tolloid (TLL)-like 1 (NETO1), transcript variant 3, mRNA [NM_138966]                      |

|                |             |      |            |         |                                                                                                                                                       |
|----------------|-------------|------|------------|---------|-------------------------------------------------------------------------------------------------------------------------------------------------------|
| A_23_P203716   | 0,018916348 | down | -1,661997  | NEU3    | Homo sapiens sialidase 3 (membrane sialidase) (NEU3), mRNA [NM_006656]                                                                                |
| A_33_P3293524  | 0,001673997 | down | -4,031506  | NEURL1  | Homo sapiens neutralized E3 ubiquitin protein ligase 1 (NEURL1), mRNA [NM_004210]                                                                     |
| A_33_P3222218  | 1,06E-04    | down | -6,7120357 | NEURL1B | Homo sapiens neutralized E3 ubiquitin protein ligase 1B (NEURL1B), mRNA [NM_001142651]                                                                |
| A_23_P360179   | 9,02E-04    | up   | 1,6177408  | NEURL4  | Homo sapiens neutralized E3 ubiquitin protein ligase 4 (NEURL4), transcript variant 1, mRNA [NM_032442]                                               |
| A_33_P3856171  | 0,004834694 | up   | 1,5211654  | NF1P2   | Homo sapiens neurofibromin 1 pseudogene 2 (NF1P2), non-coding RNA [NR_028506]                                                                         |
| A_33_P3406866  | 0,019105682 | down | -1,5455644 | NFASC   | Homo sapiens neurofascin (NFASC), transcript variant 1, mRNA [NM_001005388]                                                                           |
| A_33_P3406873  | 0,00964368  | down | -1,697259  | NFASC   | Homo sapiens neurofascin (NFASC), transcript variant 5, mRNA [NM_001005389]                                                                           |
| A_23_P359647   | 0,001177051 | up   | 1,9955714  | NFAT5   | Homo sapiens nuclear factor of activated T-cells 5, tonicity-responsive (NFAT5), transcript variant 1, mRNA [NM_138714]                               |
| A_33_P3225600  | 0,003511366 | up   | 1,5280656  | NFE2L2  | Homo sapiens nuclear factor, erythroid 2-like 2 (NFE2L2), transcript variant 1, mRNA [NM_006164]                                                      |
| A_23_P30024    | 0,004475336 | up   | 1,5669713  | NFKB1   | Homo sapiens nuclear factor of kappa light polypeptide gene enhancer in B-cells 1 (NFKB1), transcript variant 1, mRNA [NM_003998]                     |
| A_23_P106002   | 6,57E-04    | up   | 1,9049616  | NFKBIA  | Homo sapiens nuclear factor of kappa light polypeptide gene enhancer in B-cells inhibitor, alpha (NFKBIA), mRNA [NM_020529]                           |
| A_33_P3386506  | 0,020065878 | down | -1,8353041 | NFKBIL1 | Homo sapiens nuclear factor of kappa light polypeptide gene enhancer in B-cells inhibitor-like 1 (NFKBIL1), transcript variant 2, mRNA [NM_001144961] |
| A_23_P212089   | 0,010140986 | up   | 1,8924223  | NFKBIZ  | Homo sapiens nuclear factor of kappa light polypeptide gene enhancer in B-cells inhibitor, zeta (NFKBIZ), transcript variant 1, mRNA [NM_031419]      |
| A_23_P304543   | 0,002166071 | down | -1,507857  | NFX1    | Homo sapiens nuclear transcription factor, X-box binding 1 (NFX1), transcript variant 2, mRNA [NM_147133]                                             |
| A_33_P3355877  | 3,60E-04    | down | -2,5798106 | NFXL1   | Homo sapiens nuclear transcription factor, X-box binding-like 1 (NFXL1), transcript variant 4, non-coding RNA [NR_103795]                             |
| A_33_P3368706  | 0,026360476 | up   | 1,6471084  | NFYC    | Homo sapiens nuclear transcription factor Y, gamma (NFYC), transcript variant 5, mRNA [NM_001142590]                                                  |
| A_23_P115190   | 0,001995173 | down | -1,6254513 | NGF     | Homo sapiens nerve growth factor (beta polypeptide) (NGF), mRNA [NM_002506]                                                                           |
| A_21_P0000551  | 0,034179255 | down | -1,9869114 | NHEG1   | Homo sapiens neuroblastoma highly expressed 1 (NHEG1), long non-coding RNA [NR_027994]                                                                |
| A_24_P251381   | 6,11E-04    | up   | 1,713977   | NHEJ1   | Homo sapiens nonhomologous end-joining factor 1 (NHEJ1), mRNA [NM_024782]                                                                             |
| A_33_P3374258  | 1,28E-04    | down | -2,2045033 | NHLH2   | nescent helix loop helix 2 [Source:HGNC Symbol;Acc:HGNC:7818] [ENST00000369506]                                                                       |
| A_33_P3264116  | 0,00448698  | down | -1,7100171 | NHLRC1  | Homo sapiens NHL repeat containing E3 ubiquitin protein ligase 1 (NHLRC1), mRNA [NM_198586]                                                           |
| A_33_P3260747  | 0,003276244 | down | -2,59381   | NHSL2   | NHS-like 2 [Source:HGNC Symbol;Acc:HGNC:33737] [ENST00000373677]                                                                                      |
| A_33_P3283906  | 0,005401195 | down | -2,1007211 | NIP7    | Homo sapiens NIP7, nucleolar pre-rRNA processing protein (NIP7), transcript variant 1, mRNA [NM_016101]                                               |
| A_23_P170213   | 4,12E-04    | down | -4,72848   | NKAIN2  | Homo sapiens Na+/K+ transporting ATPase interacting 2 (NKAIN2), transcript variant 1, mRNA [NM_001040214]                                             |
| A_33_P3417880  | 0,025176277 | down | -1,5129054 | NKAPL   | Homo sapiens NFKB activating protein-like (NKAPL), mRNA [NM_001007531]                                                                                |
| A_21_P0006584  | 0,005895584 | down | -2,2634559 | NKAPP1  | Homo sapiens NFKB activating protein pseudogene 1 (NKAPP1), non-coding RNA [NR_027131]                                                                |
| A_23_P41804    | 0,004860871 | up   | 2,1013956  | NKD2    | Homo sapiens naked cuticle homolog 2 (Drosophila) (NKD2), transcript variant 1, mRNA [NM_033120]                                                      |
| A_23_P119042   | 0,010292025 | down | -2,5601726 | NKG7    | Homo sapiens natural killer cell granule protein 7 (NKG7), mRNA [NM_005601]                                                                           |
| A_24_P256155   | 7,83E-04    | down | -1,8861685 | NKX1-2  | Homo sapiens NK1 homeobox 2 (NKX1-2), mRNA [NM_001146340]                                                                                             |
| A_24_P38702    | 0,001249734 | down | -2,038627  | NKX2-3  | Homo sapiens NK2 homeobox 3 (NKX2-3), mRNA [NM_145285]                                                                                                |
| A_33_P3299599  | 9,04E-04    | down | -3,27701   | NKX2-5  | Homo sapiens NK2 homeobox 5 (NKX2-5), transcript variant 2, mRNA [NM_001166175]                                                                       |
| A_23_P340019   | 0,001037749 | up   | 2,2344067  | NLRC3   | Homo sapiens NLR family, CARD domain containing 3 (NLRC3), transcript variant 1, mRNA [NM_178844]                                                     |
| A_23_P89550    | 0,04720287  | up   | 1,5038708  | NLRP1   | Homo sapiens NLR family, pyrin domain containing 1 (NLRP1), transcript variant 1, mRNA [NM_033004]                                                    |
| A_23_P47579    | 0,025943493 | down | -1,7777244 | NLRP14  | Homo sapiens NLR family, pyrin domain containing 14 (NLRP14), mRNA [NM_176822]                                                                        |
| A_33_P3406047  | 0,030552896 | down | -1,6208805 | NLRP4   | Homo sapiens NLR family, pyrin domain containing 4 (NLRP4), mRNA [NM_134444]                                                                          |
| A_23_P311632   | 0,029547643 | up   | 2,5289338  | NLRP6   | Homo sapiens NLR family, pyrin domain containing 6 (NLRP6), transcript variant 1, mRNA [NM_138329]                                                    |
| A_23_P156402   | 0,027857557 | down | -1,9117494 | NME5    | Homo sapiens NME/NM23 family member 5 (NME5), mRNA [NM_003551]                                                                                        |
| A_23_P304652   | 0,006490581 | down | -2,663762  | NME9    | Homo sapiens NME/NM23 family member 9 (NME9), mRNA [NM_178130]                                                                                        |
| A_23_P122134   | 0,019939475 | down | -1,6099445 | NMUR2   | Homo sapiens neuromedin U receptor 2 (NMUR2), mRNA [NM_020167]                                                                                        |
| A_23_P336015   | 0,003438368 | up   | 1,7506347  | NOC2L   | Homo sapiens nucleolar complex associated 2 homolog (S. cerevisiae) (NOC2L), mRNA [NM_015658]                                                         |
| A_23_P138058   | 0,001841893 | up   | 1,626602   | NOC2L   | Homo sapiens nucleolar complex associated 2 homolog (S. cerevisiae) (NOC2L), mRNA [NM_015658]                                                         |
| A_19_P00318172 | 0,003904414 | down | -1,7540485 | NOL4L   | Homo sapiens nucleolar protein 4-like (NOL4L), transcript variant 1, mRNA [NM_001256798]                                                              |
| A_24_P101800   | 0,044917855 | down | -1,9421266 | NOL4L   | nucleolar protein 4-like [Source:HGNC Symbol;Acc:HGNC:16106] [ENST00000485364]                                                                        |
| A_24_P118938   | 2,03E-04    | up   | 2,3503451  | NOL4L   | Homo sapiens nucleolar protein 4-like (NOL4L), transcript variant 1, mRNA [NM_001256798]                                                              |
| A_23_P372096   | 0,007688603 | up   | 1,7032671  | NOL4L   | nucleolar protein 4-like [Source:HGNC Symbol;Acc:HGNC:16106] [ENST00000326071]                                                                        |
| A_24_P21410    | 0,009327647 | up   | 1,5646846  | NOL6    | Homo sapiens nucleolar protein 6 (RNA-associated) (NOL6), transcript variant alpha, mRNA [NM_022917]                                                  |
| A_33_P3278298  | 0,02167171  | up   | 2,3758404  | NOM1    | Homo sapiens cDNA FLJ16401 fis, clone UTERU2004299. [AK131362]                                                                                        |
| A_33_P3378430  | 1,34E-04    | up   | 1,8212479  | NOM1    | Homo sapiens nucleolar protein with MIF4G domain 1 (NOM1), mRNA [NM_138400]                                                                           |
| A_24_P151727   | 0,001767795 | up   | 1,5035468  | NONO    | Homo sapiens non-POU domain containing, octamer-binding (NONO), transcript variant 2, mRNA [NM_007363]                                                |
| A_23_P204364   | 0,009575786 | up   | 1,6311073  | NOP2    | Homo sapiens NOP2 nucleolar protein (NOP2), transcript variant 2, mRNA [NM_001033714]                                                                 |
| A_23_P79360    | 0,03721539  | down | -1,7113781 | NOSTRIN | Homo sapiens nitric oxide synthase trafficking (NOSTRIN), transcript variant 1, mRNA [NM_052946]                                                      |
| A_23_P200792   | 0,004471285 | up   | 1,5070963  | NOTCH2  | Homo sapiens notch 2 (NOTCH2), transcript variant 1, mRNA [NM_024408]                                                                                 |
| A_33_P3264771  | 0,020159049 | up   | 1,9521946  | NOTO    | Homo sapiens notochord homeobox (NOTO), mRNA [NM_001134462]                                                                                           |
| A_24_P270496   | 0,003984513 | up   | 1,5070605  | NOVA1   | Homo sapiens neuro-oncological ventral antigen 1 (NOVA1), transcript variant 3, mRNA [NM_006491]                                                      |
| A_33_P3224324  | 0,03931472  | up   | 1,6053014  | NOX4    | Homo sapiens NADPH oxidase 4 (NOX4), transcript variant NOX4B, mRNA [NM_001143836]                                                                    |
| A_23_P140475   | 0,037340295 | up   | 1,9854882  | NOX5    | Homo sapiens NADPH oxidase, EF-hand calcium binding domain 5 (NOX5), transcript variant 1, mRNA [NM_024505]                                           |
| A_23_P300740   | 0,024487728 | down | -2,076812  | NPB     | Homo sapiens neuropeptide B (NPB), mRNA [NM_148896]                                                                                                   |
| A_33_P3419970  | 0,001119719 | down | -2,2751696 | NPB     | Homo sapiens neuropeptide B (NPB), mRNA [NM_148896]                                                                                                   |
| A_23_P107587   | 0,002938846 | up   | 1,6709594  | NPC1    | Homo sapiens Niemann-Pick disease, type C1 (NPC1), mRNA [NM_000271]                                                                                   |
| A_23_P146572   | 0,003155774 | up   | 1,5817384  | NPDC1   | Homo sapiens neural proliferation, differentiation and control, 1 (NPDC1), mRNA [NM_015392]                                                           |
| A_23_P84836    | 6,00E-05    | up   | 2,0663073  | NPEPPS  | Homo sapiens aminopeptidase puromycin sensitive (NPEPPS), mRNA [NM_006310]                                                                            |

|               |                  |                     |                                                                                                                                                     |
|---------------|------------------|---------------------|-----------------------------------------------------------------------------------------------------------------------------------------------------|
| A_21_P0014949 | 0,002389173 up   | 1,8118553 NPEPPS    | Homo sapiens aminopeptidase puromycin sensitive (NPEPPS), mRNA [NM_006310]                                                                          |
| A_23_P1452    | 0,024722338 down | -1,7921013 NPFFR1   | Homo sapiens neuropeptide FF receptor 1 (NPFFR1), mRNA [NM_022146]                                                                                  |
| A_33_P3372389 | 0,04861259 down  | -2,197123 NPHP4     | Homo sapiens nephronophthisis 4 (NPHP4), transcript variant 1, mRNA [NM_015102]                                                                     |
| A_33_P3212823 | 0,003022953 down | -1,6415645 NPIPB5   | Homo sapiens nuclear pore complex interacting protein family, member B5 (NPIPB5), mRNA [NM_001135865]                                               |
| A_24_P204675  | 0,004452141 up   | 1,5356759 NPIPB5    | Homo sapiens nuclear pore complex interacting protein family, member B5 (NPIPB5), mRNA [NM_001135865]                                               |
| A_23_P339954  | 0,004380181 up   | 1,5442699 NPIPB9    | Homo sapiens nuclear pore complex interacting protein family, member B9 (NPIPB9), transcript variant 2, mRNA [NM_001287251]                         |
| A_33_P3316456 | 0,01212238 down  | -2,190545 NPL       | Homo sapiens N-acetylneuraminate pyruvate lyase (dihydrodipicolinate synthase) (NPL), transcript variant 2, mRNA [NM_001200050]                     |
| A_21_P0000687 | 0,040265396 up   | 2,233231 NPPA-AS1   | Homo sapiens NPPA antisense RNA 1 (NPPA-AS1), antisense RNA [NR_037806]                                                                             |
| A_33_P3362008 | 0,01879841 down  | -1,5872176 NPPB     | Homo sapiens natriuretic peptide B (NPPB), mRNA [NM_002521]                                                                                         |
| A_23_P62752   | 0,015774854 down | -2,422663 NPPB      | Homo sapiens natriuretic peptide B (NPPB), mRNA [NM_002521]                                                                                         |
| A_24_P95822   | 0,011762762 down | -1,5874593 NPTN     | Homo sapiens neuropilin (NPTN), transcript variant b, mRNA [NM_012428]                                                                              |
| A_23_P82651   | 0,034062736 down | -1,9872 NPTX2       | Homo sapiens neuronal pentraxin II (NPTX2), mRNA [NM_002523]                                                                                        |
| A_23_P29282   | 1,67E-04 down    | -3,4055805 NPTXR    | Homo sapiens neuronal pentraxin receptor (NPTXR), mRNA [NM_014293]                                                                                  |
| A_23_P69699   | 0,001302117 up   | 1,8257021 NPY1R     | Homo sapiens neuropeptide Y receptor Y1 (NPY1R), mRNA [NM_000909]                                                                                   |
| A_24_P364042  | 0,00744355 down  | -1,8327472 NPY4R    | Homo sapiens neuropeptide Y receptor Y4 (NPY4R), transcript variant 1, mRNA [NM_005972]                                                             |
| A_24_P411573  | 0,001925317 down | -3,0978665 NPY6R    | Homo sapiens neuropeptide Y receptor Y6 (pseudogene) (NPY6R), non-coding RNA [NR_002713]                                                            |
| A_23_P160800  | 0,003145441 down | -3,083117 NR0B2     | Homo sapiens nuclear receptor subfamily 0, group B, member 2 (NR0B2), mRNA [NM_021969]                                                              |
| A_24_P943472  | 0,02581247 up    | 1,6233679 NR1D2     | Homo sapiens nuclear receptor subfamily 1, group D, member 2 (NR1D2), transcript variant 1, mRNA [NM_005126]                                        |
| A_23_P25396   | 0,013305876 up   | 2,1403549 NR1H4     | Homo sapiens nuclear receptor subfamily 1, group H, member 4 (NR1H4), transcript variant 2, mRNA [NM_005123]                                        |
| A_23_P205867  | 0,03358383 up    | 1,9315988 NR2E3     | Homo sapiens nuclear receptor subfamily 2, group E, member 3 (NR2E3), transcript variant 2, mRNA [NM_014249]                                        |
| A_33_P3421318 | 0,007383967 down | -2,06435 NR2F2-AS1  | Homo sapiens NR2F2 antisense RNA 1 (NR2F2-AS1), transcript variant 3, long non-coding RNA [NR_125738]                                               |
| A_33_P3386150 | 0,010957693 up   | 2,0393243 NRADDP    | Homo sapiens neurotrophin receptor associated death domain, pseudogene (NRADDP), non-coding RNA [NR_024046]                                         |
| A_24_P242132  | 0,030017272 up   | 1,6964096 NRBP2     | Homo sapiens nuclear receptor binding protein 2 (NRBP2), mRNA [NM_178564]                                                                           |
| A_33_P3301514 | 0,03276224 up    | 2,2194393 NRCAM     | Homo sapiens neuronal cell adhesion molecule (NRCAM), transcript variant 4, mRNA [NM_001193582]                                                     |
| A_24_P252364  | 0,001700091 up   | 7,682432 NRCAM      | Homo sapiens neuronal cell adhesion molecule (NRCAM), transcript variant 1, mRNA [NM_001037132]                                                     |
| A_33_P3234048 | 0,004813931 up   | 2,5418632 NRDE2     | NRDE-2, necessary for RNA interference, domain containing [Source:HGNC Symbol;Acc:HGNC:20186] [ENST00000354366]                                     |
| A_23_P213699  | 0,048292883 up   | 1,7348461 NRG2      | Homo sapiens neuregulin 2 (NRG2), transcript variant 3, mRNA [NM_013982]                                                                            |
| A_23_P334727  | 0,001957601 down | -1,9204177 NRG4     | Homo sapiens neuregulin 4 (NRG4), mRNA [NM_138573]                                                                                                  |
| A_23_P211007  | 0,00452449 up    | 1,6498637 NRIP1     | Homo sapiens nuclear receptor interacting protein 1 (NRIP1), mRNA [NM_003489]                                                                       |
| A_21_P0002006 | 1,22E-04 up      | 2,4948225 NRIR      | Homo sapiens negative regulator of interferon response (non-protein coding) (NRIR), long non-coding RNA [NR_126359]                                 |
| A_33_P3338631 | 9,95E-04 down    | -1,9091784 NRL      | Homo sapiens neural retina leucine zipper (NRL), mRNA [NM_006177]                                                                                   |
| A_23_P132856  | 1,19E-04 down    | -2,7387319 NRROS    | Homo sapiens negative regulator of reactive oxygen species (NRROS), mRNA [NM_198565]                                                                |
| A_33_P3252221 | 0,011974739 up   | 1,5278227 NRSN1     | Homo sapiens neurensin 1 (NRSN1), mRNA [NM_080723]                                                                                                  |
| A_33_P3325275 | 0,001726396 down | -2,093054 NRSN2     | Homo sapiens neurensin 2 (NRSN2), mRNA [NM_024958]                                                                                                  |
| A_33_P3273669 | 7,58E-04 down    | -2,451953 NRXN1     | Homo sapiens neurexin 1 (NRXN1), transcript variant alpha1, mRNA [NM_004801]                                                                        |
| A_33_P3273684 | 0,037389204 up   | 2,021645 NRXN1      | Homo sapiens neurexin 1 (NRXN1), transcript variant alpha2, mRNA [NM_001135659]                                                                     |
| A_24_P918384  | 0,002243104 up   | 2,7493532 NSD1      | Homo sapiens nuclear receptor binding SET domain protein 1 (NSD1), transcript variant 2, mRNA [NM_022455]                                           |
| A_33_P3325087 | 3,66E-04 up      | 1,7453665 NSRP1     | Homo sapiens nuclear speckle splicing regulatory protein 1 (NSRP1), transcript variant 1, mRNA [NM_032141]                                          |
| A_23_P251505  | 9,84E-04 up      | 1,5778569 NSUN5     | Homo sapiens NOP2/Sun domain family, member 5 (NSUN5), transcript variant 1, mRNA [NM_148956]                                                       |
| A_33_P3271261 | 1,62E-04 down    | -3,1890185 NTN3     | Homo sapiens netrin 3 (NTN3), mRNA [NM_006181]                                                                                                      |
| A_33_P3221414 | 0,029822819 down | -2,901232 NTNG1     | netrin G1 [Source:HGNC Symbol;Acc:HGNC:23319] [ENST00000370068]                                                                                     |
| A_33_P3277784 | 0,002766848 up   | 2,088362 NTNG2      | netrin G2 [Source:HGNC Symbol;Acc:HGNC:14288] [ENST00000372179]                                                                                     |
| A_24_P265506  | 0,012382316 down | -2,2533813 NTRK1    | Homo sapiens neurotrophic tyrosine kinase, receptor, type 1 (NTRK1), transcript variant 2, mRNA [NM_002529]                                         |
| A_33_P3322784 | 0,003157703 up   | 1,5411966 NTRK2     | Homo sapiens neurotrophic tyrosine kinase, receptor, type 2 (NTRK2), transcript variant d, mRNA [NM_001018065]                                      |
| A_33_P3260134 | 0,001824246 down | -2,3722246 NTRK3    | Homo sapiens neurotrophic tyrosine kinase, receptor, type 3 (NTRK3), transcript variant 2, mRNA [NM_002530]                                         |
| A_23_P371039  | 0,02495735 down  | -2,355455 NTSR1     | Homo sapiens neurotensin receptor 1 (high affinity) (NTSR1), mRNA [NM_002531]                                                                       |
| A_24_P145122  | 0,00261807 down  | -1,5965099 NUCKS1   | Homo sapiens nuclear casein kinase and cyclin-dependent kinase substrate 1 (NUCKS1), mRNA [NM_022731]                                               |
| A_24_P626981  | 0,031781968 up   | 1,5822601 NUDT16P1  | Homo sapiens nudix (nucleoside diphosphate linked moiety X)-type motif 16 pseudogene 1 (NUDT16P1), transcript variant 2, non-coding RNA [NR_002949] |
| A_33_P3336810 | 0,005153067 up   | 1,6095084 NUDT17    | Homo sapiens nudix (nucleoside diphosphate linked moiety X)-type motif 17 (NUDT17), mRNA [NM_001012758]                                             |
| A_24_P50753   | 0,024144895 down | -1,6164465 NUDT4    | Homo sapiens nudix (nucleoside diphosphate linked moiety X)-type motif 4 (NUDT4), transcript variant 2, mRNA [NM_199040]                            |
| A_33_P3416503 | 0,011599925 down | -1,7402624 NUDT8    | Homo sapiens nudix (nucleoside diphosphate linked moiety X)-type motif 8 (NUDT8), transcript variant 2, mRNA [NM_181843]                            |
| A_24_P791829  | 6,45E-04 up      | 1,6766021 NUFIP2    | Homo sapiens nuclear fragile X mental retardation protein interacting protein 2 (NUFIP2), mRNA [NM_020772]                                          |
| A_33_P3246598 | 0,019162731 down | -2,739721 NUGGC     | Homo sapiens nuclear GTPase, germinal center associated (NUGGC), mRNA [NM_001010906]                                                                |
| A_33_P3246593 | 0,005528355 up   | 3,158021 NUGGC      | Homo sapiens nuclear GTPase, germinal center associated (NUGGC), mRNA [NM_001010906]                                                                |
| A_23_P43726   | 0,00478638 up    | 1,5267423 NUP160    | Homo sapiens nucleoporin 160kDa (NUP160), mRNA [NM_015231]                                                                                          |
| A_23_P211627  | 0,024939364 up   | 1,5134053 NUP50     | Homo sapiens nucleoporin 50kDa (NUP50), transcript variant 2, mRNA [NM_007172]                                                                      |
| A_23_P26777   | 0,001040732 up   | 1,6789508 NUP85     | Homo sapiens nucleoporin 85kDa (NUP85), transcript variant 1, mRNA [NM_024844]                                                                      |
| A_21_P0011128 | 0,005162046 down | -1,6331309 NUS1     | Homo sapiens nuclear undecaprenyl pyrophosphate synthase 1 homolog (S. cerevisiae) (NUS1), mRNA [NM_138459]                                         |
| A_23_P93082   | 0,010448776 down | -1,5846817 NUS1     | Homo sapiens nuclear undecaprenyl pyrophosphate synthase 1 homolog (S. cerevisiae) (NUS1), mRNA [NM_138459]                                         |
| A_33_P3311353 | 0,03827941 up    | 2,0389698 NUTM1     | Homo sapiens NUT midline carcinoma, family member 1 (NUTM1), transcript variant 3, mRNA [NM_175741]                                                 |
| A_21_P0010949 | 0,02935524 up    | 1,683138 NUTM2B-AS1 | Homo sapiens NUTM2B antisense RNA 1 (NUTM2B-AS1), transcript variant 1, long non-coding RNA [NR_120611]                                             |

|               |                  |                        |                                                                                                                               |
|---------------|------------------|------------------------|-------------------------------------------------------------------------------------------------------------------------------|
| A_21_P0010892 | 0,015135157 up   | 1,7938089 NUTM2B-AS1   | Homo sapiens NUTM2B antisense RNA 1 (NUTM2B-AS1), transcript variant 1, long non-coding RNA [NR_120611]                       |
| A_33_P3235098 | 0,014196672 down | -2,679955 NUTM2D       | Homo sapiens NUT family member 2D (NUTM2D), non-coding RNA [NR_075100]                                                        |
| A_33_P3311994 | 0,001173437 down | -1,8333664 NWD2        | Homo sapiens NACHT and WD repeat domain containing 2 (NWD2), mRNA [NM_001144990]                                              |
| A_23_P148568  | 0,037205 down    | -1,9863268 NXF2        | Homo sapiens nuclear RNA export factor 2 (NXF2), mRNA [NM_022053]                                                             |
| A_23_P1114353 | 6,13E-04 down    | -2,3162537 NXF5        | Homo sapiens nuclear RNA export factor 5 (NXF5), transcript variant 1, mRNA [NM_032946]                                       |
| A_33_P3335661 | 0,031974666 up   | 1,8642734 NXPE2        | Homo sapiens neurexophilin and PC-esterase domain family, member 2 (NXPE2), mRNA [NM_182495]                                  |
| A_24_P91916   | 0,026278896 up   | 1,6167156 NXT2         | Homo sapiens nuclear transcript factor 2-like export factor 2 (NXT2), transcript variant 1, mRNA [NM_018698]                  |
| A_23_P407654  | 0,003780992 up   | 1,7647666 NYAP1        | Homo sapiens neuronal tyrosine-phosphorylated phosphoinositide-3-kinase adaptor 1 (NYAP1), mRNA [NM_173564]                   |
| A_33_P3382835 | 0,010550587 down | -2,5840642 NYNRIN      | Homo sapiens NYN domain and retroviral integrase containing (NYNRIN), mRNA [NM_025081]                                        |
| A_23_P139786  | 0,026100144 up   | 2,2244084 OASL         | Homo sapiens 2'-5'-oligoadenylate synthetase-like (OASL), transcript variant 1, mRNA [NM_003733]                              |
| A_24_P759674  | 0,016734585 up   | 1,606538 OBFC1         | Homo sapiens oligonucleotide/oligosaccharide-binding fold containing 1 (OBFC1), mRNA [NM_024928]                              |
| A_33_P3350575 | 0,005921053 down | -1,9476157 OC90        | Homo sapiens otoconin 90 (OC90), mRNA [NM_001080399]                                                                          |
| A_23_P129133  | 0,005745504 up   | 3,098487 OCA2          | Homo sapiens oculocutaneous albinism II (OCA2), transcript variant 1, mRNA [NM_000275]                                        |
| A_23_P92672   | 0,027097465 up   | 2,2307148 OCLN         | Homo sapiens occludin (OCLN), transcript variant 1, mRNA [NM_002538]                                                          |
| A_24_P4736    | 0,011389444 down | -2,1563425 ODF3        | Homo sapiens outer dense fiber of sperm tails 3 (ODF3), transcript variant 1, mRNA [NM_053280]                                |
| A_24_P134653  | 0,010780783 up   | 1,6965927 OFD1         | Homo sapiens oral-facial-digital syndrome 1 (OFD1), mRNA [NM_003611]                                                          |
| A_33_P3227284 | 0,001088555 up   | 1,7004446 OGT          | Homo sapiens O-linked N-acetylglucosamine (GlcNAc) transferase (OGT), transcript variant 1, mRNA [NM_181672]                  |
| A_21_P0008626 | 6,92E-04 down    | -1,6473643 OIP5-AS1    | Homo sapiens OIP5 antisense RNA 1 (OIP5-AS1), long non-coding RNA [NR_026757]                                                 |
| A_23_P63777   | 0,006828985 up   | 1,613796 OIT3          | Homo sapiens oncoprotein induced transcript 3 (OIT3), transcript variant 1, mRNA [NM_152635]                                  |
| A_33_P3232269 | 0,02799962 up    | 1,6209966 OK/SW-CL.36  | Homo sapiens mRNA for OK/SW-CL.36, complete cds. [AB064670]                                                                   |
| A_33_P3383205 | 0,003990809 down | -2,3293228 OK/SW-CL.58 | Homo sapiens mRNA for OK/SW-CL.58, complete cds. [AB064667]                                                                   |
| A_33_P3248354 | 0,00591839 up    | 2,42535 OLFM1          | Homo sapiens olfactomedin 1 (OLFM1), transcript variant 2, mRNA [NM_006334]                                                   |
| A_33_P3248137 | 0,002558445 down | -1,9415053 OLFML2A     | Homo sapiens olfactomedin-like 2A (OLFML2A), transcript variant 1, mRNA [NM_182487]                                           |
| A_23_P137689  | 0,004640715 down | -2,430831 OLFML2B      | Homo sapiens olfactomedin-like 2B (OLFML2B), transcript variant 2, mRNA [NM_015441]                                           |
| A_32_P124245  | 0,030166123 down | -1,9891382 OLIG3       | Homo sapiens oligodendrocyte transcription factor 3 (OLIG3), mRNA [NM_175747]                                                 |
| A_32_P124708  | 0,005780972 down | -2,8720434 ONECUT2     | Homo sapiens one cut homeobox 2 (ONECUT2), mRNA [NM_004852]                                                                   |
| A_33_P3238969 | 0,004369856 down | -2,2201133 ONECUT3     | Homo sapiens one cut homeobox 3 (ONECUT3), mRNA [NM_001080488]                                                                |
| A_23_P96623   | 0,012263366 down | -2,3588285 OPN1MW      | Homo sapiens opsin 1 (cone pigments), medium-wave-sensitive (OPN1MW), mRNA [NM_000513]                                        |
| A_23_P24234   | 0,002182704 down | -3,3130405 OPN4        | Homo sapiens opsin 4 (OPN4), transcript variant 2, mRNA [NM_001030015]                                                        |
| A_33_P3272075 | 0,005009085 down | -2,2159388 OPRD1       | Homo sapiens opioid receptor, delta 1 (OPRD1), mRNA [NM_000911]                                                               |
| A_23_P345564  | 0,010220286 down | -2,2855544 OPRL1       | Homo sapiens opiate receptor-like 1 (OPRL1), transcript variant 1, mRNA [NM_182647]                                           |
| A_33_P3359647 | 9,37E-04 down    | -2,4119186 OPRL1       | Homo sapiens opiate receptor-like 1 (OPRL1), transcript variant 1, mRNA [NM_182647]                                           |
| A_23_P97096   | 0,01646894 down  | -2,0072184 OPTC        | Homo sapiens opticin (OPTC), mRNA [NM_014359]                                                                                 |
| A_33_P3285032 | 0,022763161 up   | 2,753948 OR10A3        | Homo sapiens olfactory receptor, family 10, subfamily A, member 3 (OR10A3), mRNA [NM_001003745]                               |
| A_23_P315991  | 5,25E-04 down    | -3,4114103 OR10A5      | Homo sapiens olfactory receptor, family 10, subfamily A, member 5 (OR10A5), mRNA [NM_178168]                                  |
| A_33_P3391370 | 0,012181696 up   | 2,1010926 OR10AG1      | Homo sapiens olfactory receptor, family 10, subfamily AG, member 1 (OR10AG1), mRNA [NM_001005491]                             |
| A_24_P60680   | 0,007067597 down | -2,3801374 OR10C1      | Homo sapiens olfactory receptor, family 10, subfamily C, member 1 (gene/pseudogene) (OR10C1), mRNA [NM_013941]                |
| A_33_P3225507 | 0,032634925 down | -1,7341892 OR10G2      | Homo sapiens olfactory receptor, family 10, subfamily G, member 2 (OR10G2), mRNA [NM_001005466]                               |
| A_33_P3225378 | 0,041694187 down | -1,6911439 OR10G3      | Homo sapiens olfactory receptor, family 10, subfamily G, member 3 (OR10G3), mRNA [NM_001005465]                               |
| A_33_P3273906 | 0,001179225 down | -4,756754 OR10G4       | Homo sapiens olfactory receptor, family 10, subfamily G, member 4 (OR10G4), mRNA [NM_001004462]                               |
| A_23_P125204  | 0,001710379 down | -1,7427746 OR10G8      | Homo sapiens olfactory receptor, family 10, subfamily G, member 8 (OR10G8), mRNA [NM_001004464]                               |
| A_33_P3290792 | 7,95E-04 down    | -3,8022256 OR10G9      | Homo sapiens olfactory receptor, family 10, subfamily G, member 9 (OR10G9), mRNA [NM_001001953]                               |
| A_23_P50799   | 0,001227054 down | -2,0943136 OR10H2      | Homo sapiens olfactory receptor, family 10, subfamily H, member 2 (OR10H2), mRNA [NM_013939]                                  |
| A_33_P3381067 | 0,004953384 up   | 1,9446958 OR10Q1       | Homo sapiens olfactory receptor, family 10, subfamily Q, member 1 (OR10Q1), mRNA [NM_001004471]                               |
| A_33_P3766667 | 0,03623942 down  | -2,179765 OR10R3P      | Homo sapiens cDNA FLJ16108 fis, clone THYMU2009425, moderately similar to OLFACTORY RECEPTOR-LIKE PROTEIN HGMP07J. [AK122667] |
| A_33_P3313250 | 0,04290828 up    | 1,866483 OR10X1        | Homo sapiens olfactory receptor, family 10, subfamily X, member 1 (gene/pseudogene) (OR10X1), mRNA [NM_001004477]             |
| A_23_P59099   | 7,95E-04 down    | -2,4706976 OR11A1      | Homo sapiens olfactory receptor, family 11, subfamily A, member 1 (OR11A1), mRNA [NM_013937]                                  |
| A_23_P169207  | 0,031254042 down | -2,2509897 OR13C4      | Homo sapiens olfactory receptor, family 13, subfamily C, member 4 (OR13C4), mRNA [NM_001001919]                               |
| A_33_P3266484 | 0,012560548 up   | 1,7373185 OR13F1       | Homo sapiens olfactory receptor, family 13, subfamily F, member 1 (OR13F1), mRNA [NM_001004485]                               |
| A_33_P3266489 | 0,004778009 down | -3,0014067 OR13H1      | Homo sapiens olfactory receptor, family 13, subfamily H, member 1 (OR13H1), mRNA [NM_001004486]                               |
| A_33_P3345464 | 0,005645712 up   | 1,5151366 OR14C36      | Homo sapiens olfactory receptor, family 14, subfamily C, member 36 (OR14C36), mRNA [NM_001001918]                             |
| A_23_P130281  | 1,06E-04 down    | -3,1400967 OR1A2       | Homo sapiens olfactory receptor, family 1, subfamily A, member 2 (OR1A2), mRNA [NM_012352]                                    |
| A_23_P382506  | 3,37E-04 down    | -2,6885407 OR1F2P      | Homo sapiens olfactory receptor, family 1, subfamily F, member 2 (OR1F2P), non-coding RNA [NR_002169]                         |
| A_33_P3338382 | 0,005240858 down | -2,4790673 OR1K1       | Homo sapiens olfactory receptor, family 1, subfamily K, member 1 (OR1K1), mRNA [NM_080859]                                    |
| A_33_P3299619 | 0,013759104 up   | 3,1697783 OR1L1        | Homo sapiens olfactory receptor, family 1, subfamily L, member 1 (OR1L1), mRNA [NM_001005236]                                 |
| A_33_P3223739 | 0,001311063 down | -2,2281668 OR1N1       | Homo sapiens olfactory receptor, family 1, subfamily N, member 1 (OR1N1), mRNA [NM_012363]                                    |
| A_24_P506816  | 0,037139498 down | -2,056911 OR2A20P      | Homo sapiens olfactory receptor, family 2, subfamily A, member 20 pseudogene (OR2A20P), non-coding RNA [NR_002158]            |
| A_24_P52293   | 0,005205235 down | -2,048576 OR2A25       | Homo sapiens olfactory receptor, family 2, subfamily A, member 25 (OR2A25), mRNA [NM_001004488]                               |
| A_33_P3423335 | 0,039884757 up   | 1,9075545 OR2AE1       | Homo sapiens olfactory receptor, family 2, subfamily AE, member 1 (OR2AE1), mRNA [NM_001005276]                               |
| A_23_P36439   | 0,001674779 down | -1,9889965 OR2AP1      | Homo sapiens olfactory receptor, family 2, subfamily AP, member 1 (OR2AP1), mRNA [NM_001258285]                               |
| A_33_P3365621 | 0,016764833 up   | 2,057348 OR2AT4        | Homo sapiens olfactory receptor, family 2, subfamily AT, member 4 (OR2AT4), mRNA [NM_001005285]                               |

|               |                  |                    |                                                                                                                       |
|---------------|------------------|--------------------|-----------------------------------------------------------------------------------------------------------------------|
| A_33_P3310377 | 0,04275748 up    | 1,6165267 OR2B11   | Homo sapiens olfactory receptor, family 2, subfamily B, member 11 (OR2B11), mRNA [NM_001004492]                       |
| A_23_P111088  | 7,69E-05 down    | -2,227896 OR2B2    | Homo sapiens olfactory receptor, family 2, subfamily B, member 2 (OR2B2), mRNA [NM_033057]                            |
| A_33_P3264193 | 0,010380799 up   | 2,694678 OR2D2     | Homo sapiens olfactory receptor, family 2, subfamily D, member 2 (OR2D2), mRNA [NM_003700]                            |
| A_23_P8716    | 5,57E-05 down    | -3,4915853 OR2F1   | Homo sapiens olfactory receptor, family 2, subfamily F, member 1 (gene/pseudogene) (OR2F1), mRNA [NM_012369]          |
| A_33_P3267769 | 0,045258008 up   | 2,3939729 OR2G3    | Homo sapiens olfactory receptor, family 2, subfamily G, member 3 (OR2G3), mRNA [NM_001001914]                         |
| A_33_P3365082 | 0,006239188 up   | 1,614535 OR2G6     | Homo sapiens olfactory receptor, family 2, subfamily G, member 6 (OR2G6), mRNA [NM_001013355]                         |
| A_23_P111092  | 0,007200058 down | -1,9487162 OR2H1   | Homo sapiens olfactory receptor, family 2, subfamily H, member 1 (OR2H1), mRNA [NM_030883]                            |
| A_33_P3387781 | 0,009608569 down | -1,6519259 OR2L1P  | Homo sapiens olfactory receptor, family 2, subfamily L, member 1 pseudogene (OR2L1P), non-coding RNA [NR_002145]      |
| A_33_P3369979 | 1,72E-04 down    | -2,8982615 OR2L2   | Homo sapiens olfactory receptor, family 2, subfamily L, member 2 (OR2L2), mRNA [NM_001004686]                         |
| A_33_P3331952 | 0,02389502 down  | -2,0886557 OR2M3   | Homo sapiens olfactory receptor, family 2, subfamily M, member 3 (OR2M3), mRNA [NM_001004689]                         |
| A_33_P3331966 | 0,005469095 up   | 2,8720655 OR2M4    | Homo sapiens olfactory receptor, family 2, subfamily M, member 4 (OR2M4), mRNA [NM_017504]                            |
| A_33_P3311046 | 9,18E-06 down    | -3,580687 OR2M7    | Homo sapiens olfactory receptor, family 2, subfamily M, member 7 (OR2M7), mRNA [NM_001004691]                         |
| A_33_P3230886 | 0,002598262 up   | 1,7961943 OR2T11   | Homo sapiens olfactory receptor, family 2, subfamily T, member 11 (gene/pseudogene) (OR2T11), mRNA [NM_001001964]     |
| A_33_P3350086 | 0,020657936 up   | 2,1281207 OR2T33   | Homo sapiens olfactory receptor, family 2, subfamily T, member 33 (OR2T33), mRNA [NM_001004695]                       |
| A_33_P3260667 | 0,013380126 up   | 2,1196475 OR2T34   | Homo sapiens olfactory receptor, family 2, subfamily T, member 34 (OR2T34), mRNA [NM_001001821]                       |
| A_23_P107483  | 2,83E-04 down    | -5,1384115 OR3A3   | Homo sapiens olfactory receptor, family 3, subfamily A, member 3 (OR3A3), mRNA [NM_012373]                            |
| A_33_P3282693 | 6,99E-04 down    | -1,8982828 OR3A4P  | Homo sapiens olfactory receptor, family 3, subfamily A, member 4 pseudogene (OR3A4P), non-coding RNA [NR_024128]      |
| A_23_P139099  | 2,99E-04 down    | -5,8948903 OR4A15  | Homo sapiens olfactory receptor, family 4, subfamily A, member 15 (OR4A15), mRNA [NM_001005275]                       |
| A_33_P3231715 | 0,017567094 up   | 1,5125734 OR4A47   | Homo sapiens olfactory receptor, family 4, subfamily A, member 47 (OR4A47), mRNA [NM_001005512]                       |
| A_33_P3213144 | 0,048408054 up   | 1,8001727 OR4C11   | Homo sapiens olfactory receptor, family 4, subfamily C, member 11 (OR4C11), mRNA [NM_001004700]                       |
| A_33_P3210637 | 0,04597922 up    | 2,1822824 OR4C16   | Homo sapiens olfactory receptor, family 4, subfamily C, member 16 (gene/pseudogene) (OR4C16), mRNA [NM_001004701]     |
| A_23_P2077    | 0,007677946 down | -2,4164681 OR4C3   | Homo sapiens olfactory receptor, family 4, subfamily C, member 3 (OR4C3), mRNA [NM_001004702]                         |
| A_33_P3239278 | 0,002466427 down | -3,6244109 OR4D10  | Homo sapiens olfactory receptor, family 4, subfamily D, member 10 (OR4D10), mRNA [NM_001004705]                       |
| A_33_P3420635 | 0,002055555 down | -2,0595808 OR4D6   | Homo sapiens olfactory receptor, family 4, subfamily D, member 6 (OR4D6), mRNA [NM_001004708]                         |
| A_33_P3420640 | 0,011772635 up   | 3,005202 OR4D9     | Homo sapiens olfactory receptor, family 4, subfamily D, member 9 (OR4D9), mRNA [NM_001004711]                         |
| A_33_P3308142 | 8,31E-04 down    | -2,1169314 OR4F13P | Homo sapiens olfactory receptor, family 4, subfamily F, member 13 pseudogene (OR4F13P), non-coding RNA [NR_046417]    |
| A_33_P3290874 | 0,009642881 up   | 1,8540063 OR4F15   | Homo sapiens olfactory receptor, family 4, subfamily F, member 15 (OR4F15), mRNA [NM_001001674]                       |
| A_33_P3218659 | 0,002312795 up   | 1,8027846 OR4N2    | Homo sapiens olfactory receptor, family 4, subfamily N, member 2 (OR4N2), mRNA [NM_001004723]                         |
| A_33_P3312529 | 0,003014722 up   | 1,6246563 OR4N3P   | Homo sapiens olfactory receptor, family 4, subfamily N, member 3 pseudogene (OR4N3P), non-coding RNA [NR_028067]      |
| A_33_P3315979 | 4,50E-04 down    | -2,681299 OR4Q3    | Homo sapiens olfactory receptor, family 4, subfamily Q, member 3 (OR4Q3), mRNA [NM_172194]                            |
| A_23_P13479   | 1,88E-04 down    | -2,5835233 OR4S1   | Homo sapiens olfactory receptor, family 4, subfamily S, member 1 (OR4S1), mRNA [NM_001004725]                         |
| A_33_P3210653 | 0,008885331 up   | 1,5214895 OR51A4   | Homo sapiens olfactory receptor, family 51, subfamily A, member 4 (OR51A4), mRNA [NM_001005329]                       |
| A_23_P13455   | 0,003595567 down | -3,2587981 OR51A7  | Homo sapiens olfactory receptor, family 51, subfamily A, member 7 (OR51A7), mRNA [NM_001004749]                       |
| A_24_P58204   | 0,00119164 down  | -2,6878226 OR51B5  | Homo sapiens olfactory receptor, family 51, subfamily B, member 5 (OR51B5), transcript variant 1, mRNA [NM_001005567] |
| A_23_P24898   | 6,97E-06 down    | -2,724301 OR51D1   | Homo sapiens olfactory receptor, family 51, subfamily D, member 1 (OR51D1), mRNA [NM_001004751]                       |
| A_33_P3424507 | 1,02E-04 down    | -3,147332 OR51F1   | Homo sapiens olfactory receptor, family 51, subfamily F, member 1 (gene/pseudogene) (OR51F1), mRNA [NM_001004752]     |
| A_23_P105118  | 2,42E-04 down    | -2,3055463 OR51G1  | Homo sapiens olfactory receptor, family 51, subfamily G, member 1 (gene/pseudogene) (OR51G1), mRNA [NM_001005237]     |
| A_33_P3322769 | 0,025163736 down | -2,3581405 OR51G2  | Homo sapiens olfactory receptor, family 51, subfamily G, member 2 (OR51G2), mRNA [NM_001005238]                       |
| A_33_P3333648 | 7,76E-04 down    | -4,8825912 OR51I2  | Homo sapiens olfactory receptor, family 51, subfamily I, member 2 (OR51I2), mRNA [NM_001004754]                       |
| A_33_P3208951 | 0,017625254 up   | 1,6265873 OR51L1   | Homo sapiens olfactory receptor, family 51, subfamily L, member 1 (OR51L1), mRNA [NM_001004755]                       |
| A_23_P36203   | 0,003401211 down | -2,4920852 OR52B2  | Homo sapiens olfactory receptor, family 52, subfamily B, member 2 (OR52B2), mRNA [NM_001004052]                       |
| A_33_P3423375 | 0,031025419 up   | 2,1908667 OR52B6   | Homo sapiens olfactory receptor, family 52, subfamily B, member 6 (OR52B6), mRNA [NM_001005162]                       |
| A_33_P3303905 | 0,029343242 up   | 2,6550999 OR52E4   | Homo sapiens olfactory receptor, family 52, subfamily E, member 4 (OR52E4), mRNA [NM_001005165]                       |
| A_33_P3281990 | 0,018217295 up   | 2,9310203 OR52E8   | Homo sapiens olfactory receptor, family 52, subfamily E, member 8 (OR52E8), mRNA [NM_001005168]                       |
| A_33_P3289401 | 0,025732711 up   | 2,242614 OR52J3    | Homo sapiens olfactory receptor, family 52, subfamily J, member 3 (OR52J3), mRNA [NM_001001916]                       |
| A_23_P98744   | 0,007172618 down | -1,6615777 OR52K2  | Homo sapiens olfactory receptor, family 52, subfamily K, member 2 (OR52K2), mRNA [NM_001005172]                       |
| A_33_P3229042 | 0,001611285 up   | 1,8852211 OR52N1   | Homo sapiens olfactory receptor, family 52, subfamily N, member 1 (OR52N1), mRNA [NM_001001913]                       |
| A_33_P3303945 | 0,012066483 up   | 1,5312277 OR52N4   | Homo sapiens olfactory receptor, family 52, subfamily N, member 4 (gene/pseudogene) (OR52N4), mRNA [NM_001005175]     |
| A_33_P3306342 | 0,005794936 down | -2,6158733 OR52N5  | Homo sapiens olfactory receptor, family 52, subfamily N, member 5 (OR52N5), mRNA [NM_001001922]                       |
| A_33_P3383246 | 0,001139946 down | -1,9188237 OR52R1  | Homo sapiens olfactory receptor, family 52, subfamily R, member 1 (gene/pseudogene) (OR52R1), mRNA [NM_001005177]     |
| A_33_P3366584 | 6,72E-04 down    | -2,6991994 OR56A4  | Homo sapiens olfactory receptor, family 56, subfamily A, member 4 (OR56A4), mRNA [NM_001005179]                       |
| A_23_P75764   | 1,33E-04 down    | -5,2734756 OR5A1   | Homo sapiens olfactory receptor, family 5, subfamily A, member 1 (OR5A1), mRNA [NM_001004728]                         |
| A_33_P3389673 | 0,03434065 up    | 2,3966675 OR5A2    | Homo sapiens olfactory receptor, family 5, subfamily A, member 2 (OR5A2), mRNA [NM_001001954]                         |
| A_33_P3389713 | 0,009704749 up   | 1,5092523 OR5AR1   | Homo sapiens olfactory receptor, family 5, subfamily AR, member 1 (gene/pseudogene) (OR5AR1), mRNA [NM_001004730]     |
| A_33_P3380452 | 0,018418264 up   | 2,2278075 OR5B12   | Homo sapiens olfactory receptor, family 5, subfamily B, member 12 (OR5B12), mRNA [NM_001004733]                       |
| A_33_P3417985 | 0,007080638 up   | 2,1670299 OR5B17   | Homo sapiens olfactory receptor, family 5, subfamily B, member 17 (OR5B17), mRNA [NM_001005489]                       |
| A_33_P3258602 | 6,69E-04 up      | 2,7529066 OR5B2    | Homo sapiens olfactory receptor, family 5, subfamily B, member 2 (OR5B2), mRNA [NM_001005566]                         |
| A_33_P3313065 | 0,005894904 down | -2,896391 OR5C1    | Homo sapiens olfactory receptor, family 5, subfamily C, member 1 (OR5C1), mRNA [NM_001001923]                         |
| A_33_P3363949 | 0,003275975 up   | 1,5561773 OR5D13   | Homo sapiens olfactory receptor, family 5, subfamily D, member 13 (gene/pseudogene) (OR5D13), mRNA [NM_001001967]     |
| A_33_P3224535 | 0,001004434 up   | 2,5785334 OR5D18   | Homo sapiens olfactory receptor, family 5, subfamily D, member 18 (OR5D18), mRNA [NM_001001952]                       |
| A_33_P3356557 | 0,019931592 up   | 1,792738 OR5D18    | Homo sapiens olfactory receptor, family 5, subfamily D, member 18 (OR5D18), mRNA [NM_001001952]                       |



|                |             |      |            |            |                                                                                                                                          |
|----------------|-------------|------|------------|------------|------------------------------------------------------------------------------------------------------------------------------------------|
| A_23_P127684   | 9,19E-04    | down | -3,293139  | OR5F1      | Homo sapiens olfactory receptor, family 5, subfamily F, member 1 (OR5F1), mRNA [NM_003697]                                               |
| A_33_P3242064  | 0,017754449 | up   | 3,432592   | OR5J2      | Homo sapiens olfactory receptor, family 5, subfamily J, member 2 (OR5J2), mRNA [NM_001005492]                                            |
| A_33_P3419551  | 0,009239809 | up   | 2,369195   | OR5K1      | Homo sapiens olfactory receptor, family 5, subfamily K, member 1 (OR5K1), mRNA [NM_001004736]                                            |
| A_33_P3343526  | 0,014641221 | up   | 2,2335374  | OR5M9      | Homo sapiens olfactory receptor, family 5, subfamily M, member 9 (OR5M9), mRNA [NM_001004743]                                            |
| A_33_P3271221  | 0,03979505  | up   | 1,8698763  | OR5T1      | Homo sapiens olfactory receptor, family 5, subfamily T, member 1 (OR5T1), mRNA [NM_001004745]                                            |
| A_33_P3271226  | 0,004299074 | up   | 1,5457038  | OR5T3      | Homo sapiens olfactory receptor, family 5, subfamily T, member 3 (OR5T3), mRNA [NM_001004747]                                            |
| A_23_P42241    | 0,005591505 | down | -2,303802  | OR5V1      | Homo sapiens olfactory receptor, family 5, subfamily V, member 1 (OR5V1), mRNA [NM_030876]                                               |
| A_33_P3316470  | 0,02196035  | up   | 1,5681694  | OR6B1      | Homo sapiens olfactory receptor, family 6, subfamily B, member 1 (OR6B1), mRNA [NM_001005281]                                            |
| A_33_P3383271  | 0,031749576 | up   | 1,7139796  | OR6C3      | Homo sapiens olfactory receptor, family 6, subfamily C, member 3 (OR6C3), mRNA [NM_054104]                                               |
| A_33_P3400678  | 0,015540849 | up   | 1,5931393  | OR6C4      | Homo sapiens olfactory receptor, family 6, subfamily C, member 4 (OR6C4), mRNA [NM_001005494]                                            |
| A_33_P3271166  | 2,77E-04    | down | -3,511871  | OR6C74     | Homo sapiens olfactory receptor, family 6, subfamily C, member 74 (OR6C74), mRNA [NM_001005490]                                          |
| A_33_P3330881  | 0,03026075  | up   | 1,6353365  | OR6C75     | Homo sapiens olfactory receptor, family 6, subfamily C, member 75 (OR6C75), mRNA [NM_001005497]                                          |
| A_33_P3283320  | 0,011310394 | up   | 1,8658123  | OR6F1      | Homo sapiens olfactory receptor, family 6, subfamily F, member 1 (OR6F1), mRNA [NM_001005286]                                            |
| A_23_P51761    | 0,013125476 | down | -2,3204024 | OR6K2      | Homo sapiens olfactory receptor, family 6, subfamily K, member 2 (OR6K2), mRNA [NM_001005279]                                            |
| A_33_P3255706  | 0,038161643 | up   | 2,404831   | OR6K6      | Homo sapiens olfactory receptor, family 6, subfamily K, member 6 (OR6K6), mRNA [NM_001005184]                                            |
| A_23_P23502    | 0,008681828 | down | -2,1089737 | OR6N1      | Homo sapiens olfactory receptor, family 6, subfamily N, member 1 (OR6N1), mRNA [NM_001005185]                                            |
| A_33_P3258206  | 0,008781507 | up   | 2,601408   | OR6N2      | Homo sapiens olfactory receptor, family 6, subfamily N, member 2 (OR6N2), mRNA [NM_001005278]                                            |
| A_33_P3342469  | 0,001189114 | down | -1,7908281 | OR6T1      | Homo sapiens olfactory receptor, family 6, subfamily T, member 1 (OR6T1), mRNA [NM_001005187]                                            |
| A_33_P3265244  | 0,020334423 | down | -2,293603  | OR6V1      | Homo sapiens olfactory receptor, family 6, subfamily V, member 1 (OR6V1), mRNA [NM_001001667]                                            |
| A_23_P123164   | 0,002433654 | down | -2,3287656 | OR6W1P     | Homo sapiens olfactory receptor, family 6, subfamily W, member 1 pseudogene (OR6W1P), non-coding RNA [NR_002140]                         |
| A_23_P85963    | 1,32E-04    | down | -2,6328394 | OR6Y1      | Homo sapiens olfactory receptor, family 6, subfamily Y, member 1 (OR6Y1), mRNA [NM_001005189]                                            |
| A_23_P28023    | 1,92E-04    | down | -2,8394368 | OR7A17     | Homo sapiens olfactory receptor, family 7, subfamily A, member 17 (OR7A17), mRNA [NM_030901]                                             |
| A_33_P3867391  | 0,011385617 | down | -2,438094  | OR7E19P    | AGENCOURT_6564958 NIH_MGC_119 Homo sapiens cDNA clone IMAGE:5743918 5', mRNA sequence [BM563292]                                         |
| A_21_P0014676  | 1,85E-04    | down | -3,8823173 | OR7E47P    | Homo sapiens olfactory receptor, family 7, subfamily E, member 47 pseudogene (OR7E47P), transcript variant 4, non-coding RNA [NR_120438] |
| A_23_P408930   | 0,020716727 | down | -2,4416728 | OR7E5P     | Homo sapiens olfactory receptor, family 7, subfamily E, member 5 pseudogene (OR7E5P), non-coding RNA [NR_027688]                         |
| A_33_P3300610  | 0,020876633 | down | -2,1259708 | OR7G2      | Homo sapiens olfactory receptor, family 7, subfamily G, member 2 (OR7G2), mRNA [NM_001005193]                                            |
| A_23_P141939   | 0,04465835  | down | -1,8934103 | OR7G3      | Homo sapiens olfactory receptor, family 7, subfamily G, member 3 (OR7G3), mRNA [NM_001001958]                                            |
| A_33_P3345683  | 0,030609543 | up   | 2,415741   | OR8B12     | Homo sapiens olfactory receptor, family 8, subfamily B, member 12 (OR8B12), mRNA [NM_001005195]                                          |
| A_33_P3253574  | 0,04884437  | down | -2,0726106 | OR8B3      | Homo sapiens olfactory receptor, family 8, subfamily B, member 3 (OR8B3), mRNA [NM_001005467]                                            |
| A_23_P127662   | 0,0286937   | down | -1,9781832 | OR8D1      | Homo sapiens olfactory receptor, family 8, subfamily D, member 1 (OR8D1), mRNA [NM_001002917]                                            |
| A_23_P139050   | 8,67E-04    | down | -2,507722  | OR8D2      | Homo sapiens olfactory receptor, family 8, subfamily D, member 2 (gene/pseudogene) (OR8D2), mRNA [NM_001002918]                          |
| A_23_P75707    | 2,73E-04    | down | -2,9737904 | OR8H1      | Homo sapiens olfactory receptor, family 8, subfamily H, member 1 (OR8H1), mRNA [NM_001005199]                                            |
| A_33_P3300864  | 0,038115393 | down | -1,9922559 | OR8H2      | Homo sapiens olfactory receptor, family 8, subfamily H, member 2 (OR8H2), mRNA [NM_001005200]                                            |
| A_33_P3300858  | 0,008135446 | down | -2,3250535 | OR8H3      | Homo sapiens olfactory receptor, family 8, subfamily H, member 3 (OR8H3), mRNA [NM_001005201]                                            |
| A_33_P3305388  | 0,032834895 | up   | 1,7348851  | OR8K5      | Homo sapiens olfactory receptor, family 8, subfamily K, member 5 (OR8K5), mRNA [NM_001004058]                                            |
| A_23_P24676    | 0,034402426 | down | -2,2296932 | OR8U1      | Homo sapiens olfactory receptor, family 8, subfamily U, member 1 (OR8U1), mRNA [NM_001005204]                                            |
| A_33_P3361991  | 3,73E-04    | down | -3,465477  | OR9A2      | Homo sapiens olfactory receptor, family 9, subfamily A, member 2 (OR9A2), mRNA [NM_001001658]                                            |
| A_33_P3348569  | 0,004469313 | up   | 2,8144004  | OR9G4      | Homo sapiens olfactory receptor, family 9, subfamily G, member 4 (OR9G4), mRNA [NM_001005284]                                            |
| A_24_P104091   | 0,004035441 | up   | 1,5304418  | ORA0V1     | Homo sapiens oral cancer overexpressed 1 (ORA0V1), mRNA [NM_153451]                                                                      |
| A_33_P3381410  | 0,001305408 | down | -1,6660612 | ORC2       | Homo sapiens origin recognition complex, subunit 2 (ORC2), transcript variant 1, mRNA [NM_006190]                                        |
| A_23_P39616    | 0,002860244 | up   | 1,5174649  | ORC2       | Homo sapiens origin recognition complex, subunit 2 (ORC2), transcript variant 1, mRNA [NM_006190]                                        |
| A_23_P169494   | 0,012584661 | up   | 1,8092697  | ORM1       | Homo sapiens orosomucoid 1 (ORM1), mRNA [NM_000607]                                                                                      |
| A_23_P129829   | 5,09E-04    | down | -1,7993774 | ORMDL3     | Homo sapiens ORMDL sphingolipid biosynthesis regulator 3 (ORMDL3), mRNA [NM_139280]                                                      |
| A_33_P3394972  | 0,005441499 | up   | 1,8170481  | OSBPL5     | Homo sapiens oxysterol binding protein-like 5 (OSBPL5), transcript variant 1, mRNA [NM_020896]                                           |
| A_23_P53081    | 0,002773081 | up   | 1,6820652  | OSBPL5     | Homo sapiens oxysterol binding protein-like 5 (OSBPL5), transcript variant 1, mRNA [NM_020896]                                           |
| A_33_P3255194  | 4,57E-04    | down | -1,957056  | OSBPL6     | Homo sapiens oxysterol binding protein-like 6 (OSBPL6), transcript variant 5, mRNA [NM_001201482]                                        |
| A_33_P3277373  | 0,001996342 | down | -2,3197296 | OSM        | Homo sapiens oncostatin M (OSM), mRNA [NM_020530]                                                                                        |
| A_24_P55496    | 0,004719114 | down | -1,7628931 | OSR2       | Homo sapiens odd-skipped related transcription factor 2 (OSR2), transcript variant 2, mRNA [NM_053001]                                   |
| A_24_P317450   | 3,44E-04    | down | -2,3754592 | OSTCP1     | Homo sapiens oligosaccharyltransferase complex subunit pseudogene 1 (OSTCP1), non-coding RNA [NR_028496]                                 |
| A_21_P0004602  | 0,023023602 | up   | 1,7287875  | OSTM1-AS1  | OSTM1 antisense RNA 1 [Source:HGNC Symbol;Acc:HGNC:43666] [ENST00000441184]                                                              |
| A_23_P257355   | 0,014776409 | up   | 2,547601   | OTC        | Homo sapiens ornithine carbamoyltransferase (OTC), mRNA [NM_000531]                                                                      |
| A_33_P3364308  | 3,83E-04    | down | -3,4251778 | OTOA       | otancorin [Source:HGNC Symbol;Acc:HGNC:16378] [ENST00000563871]                                                                          |
| A_23_P254852   | 4,14E-04    | down | -1,9700263 | OTOF       | Homo sapiens otoferlin (OTOF), transcript variant 1, mRNA [NM_194248]                                                                    |
| A_33_P3326643  | 2,59E-04    | down | -2,3997157 | OTOG       | Homo sapiens otogelin (OTOG), transcript variant 1, mRNA [NM_001277269]                                                                  |
| A_21_P0011057  | 0,02961104  | down | -2,4803238 | OTOGL      | Homo sapiens otogelin-like (OTOGL), mRNA [NM_173591]                                                                                     |
| A_23_P90997    | 0,001843449 | down | -2,459764  | OTOS       | Homo sapiens otospiralin (OTOS), mRNA [NM_148961]                                                                                        |
| A_24_P402898   | 3,39E-05    | up   | 2,095009   | OTUD4      | Homo sapiens OTU deubiquitinase 4 (OTUD4), transcript variant 3, mRNA [NM_001102653]                                                     |
| A_32_P169574   | 9,17E-04    | up   | 1,7905633  | OTUD5      | Homo sapiens OTU deubiquitinase 5 (OTUD5), transcript variant 1, mRNA [NM_017602]                                                        |
| A_19_P00329048 | 0,041767642 | down | -1,9538356 | OTUD6B-AS1 | Homo sapiens OTUD6B antisense RNA 1 (head to head) (OTUD6B-AS1), transcript variant 1, long non-coding RNA [NR_110438]                   |
| A_21_P0011090  | 0,023074916 | up   | 2,0532122  | OVOS2      |                                                                                                                                          |
| A_33_P3447304  | 0,009017119 | up   | 1,9566851  | OXR1       | Homo sapiens oxidation resistance 1 (OXR1), transcript variant 4, mRNA [NM_001198533]                                                    |

|                |                  |                       |                                                                                                                                            |
|----------------|------------------|-----------------------|--------------------------------------------------------------------------------------------------------------------------------------------|
| A_23_P418413   | 0,010517987 up   | 1,7307795 OXSR1       | Homo sapiens oxidative stress responsive 1 (OXSR1), mRNA [NM_005109]                                                                       |
| A_24_P382579   | 0,004912084 down | -1,5769534 OXT        | Homo sapiens oxytocin/neurophysin I prepropeptide (OXT), mRNA [NM_000915]                                                                  |
| A_23_P372848   | 0,001458099 down | -2,3753898 P2RX1      | Homo sapiens purinergic receptor P2X, ligand gated ion channel, 1 (P2RX1), mRNA [NM_002558]                                                |
| A_23_P124003   | 4,84E-06 down    | -2,092846 P2RX2       | Homo sapiens purinergic receptor P2X, ligand gated ion channel, 2 (P2RX2), transcript variant 4, mRNA [NM_170683]                          |
| A_23_P127721   | 9,14E-04 down    | -1,910056 P2RX3       | Homo sapiens purinergic receptor P2X, ligand gated ion channel, 3 (P2RX3), mRNA [NM_002559]                                                |
| A_23_P346376   | 6,89E-04 down    | -2,7239776 P2RY10     | Homo sapiens purinergic receptor P2Y, G-protein coupled, 10 (P2RY10), transcript variant 1, mRNA [NM_014499]                               |
| A_24_P165864   | 0,002766851 up   | 1,8962711 P2RY14      | Homo sapiens purinergic receptor P2Y, G-protein coupled, 14 (P2RY14), transcript variant 2, mRNA [NM_014879]                               |
| A_23_P114307   | 0,003070912 down | -1,7766659 P2RY4      | Homo sapiens pyrimidinergic receptor P2Y, G-protein coupled, 4 (P2RY4), mRNA [NM_002565]                                                   |
| A_24_P340128   | 0,012922802 up   | 1,6336266 P2RY8       | Homo sapiens purinergic receptor P2Y, G-protein coupled, 8 (P2RY8), mRNA [NM_178129]                                                       |
| A_23_P69179    | 0,033441156 up   | 1,9956447 P3H2        | Homo sapiens prolyl 3-hydroxylase 2 (P3H2), transcript variant 1, mRNA [NM_018192]                                                         |
| A_21_P0003077  | 0,003273956 up   | 2,0127995 P3H2-AS1    | PREDICTED: Homo sapiens uncharacterized LOC101929152 (LOC101929152), ncRNA [XR_241635]                                                     |
| A_24_P290286   | 0,035311103 up   | 2,0112612 P4HA3       | Homo sapiens prolyl 4-hydroxylase, alpha polypeptide III (P4HA3), transcript variant 1, mRNA [NM_182904]                                   |
| A_24_P827491   | 0,005337297 down | -2,3202643 PA2G4      | Homo sapiens proliferation-associated 2G4, 38kDa (PA2G4), mRNA [NM_006191]                                                                 |
| A_33_P3413808  | 0,031272847 down | -1,9377786 PABPC1L    | Homo sapiens poly(A) binding protein, cytoplasmic 1-like (PABPC1L), mRNA [NM_001124756]                                                    |
| A_24_P162454   | 0,004072938 down | -2,3940876 PABPC1L2B  | Homo sapiens poly(A) binding protein, cytoplasmic 1-like 2B (PABPC1L2B), mRNA [NM_001042506]                                               |
| A_23_P48307    | 0,014632347 down | -2,675061 PABPC3      | Homo sapiens poly(A) binding protein, cytoplasmic 3 (PABPC3), mRNA [NM_030979]                                                             |
| A_33_P3838128  | 0,013666823 down | -2,1025033 PABPC5-AS1 | 5000ECD06 Fetal Brain 18 Homo sapiens cDNA 5', mRNA sequence [DR033788]                                                                    |
| A_23_P170901   | 0,00222703 down  | -2,7807186 PACRG      | Homo sapiens PARK2 co-regulated (PACRG), transcript variant 1, mRNA [NM_152410]                                                            |
| A_33_P3778618  | 0,004979041 up   | 1,7290627 PACRG-AS1   | Homo sapiens PACRG antisense RNA 1 (PACRG-AS1), long non-coding RNA [NR_028390]                                                            |
| A_23_P126869   | 3,80E-04 down    | -2,579594 PADI3       | Homo sapiens peptidyl arginine deiminase, type III (PADI3), mRNA [NM_016233]                                                               |
| A_21_P0011841  | 0,01970487 up    | 1,5961697 PAFAH1B1    | Homo sapiens platelet-activating factor acetylhydrolase 1b, regulatory subunit 1 (45kDa) (PAFAH1B1), mRNA [NM_000430]                      |
| A_33_P3216890  | 0,026805284 up   | 1,8420718 PAG1        | Homo sapiens phosphoprotein membrane anchor with glycosphingolipid microdomains 1 (PAG1), mRNA [NM_018440]                                 |
| A_32_P109683   | 0,018066635 up   | 2,259293 PAGE2B       | Homo sapiens P antigen family, member 2B (PAGE2B), mRNA [NM_001015038]                                                                     |
| A_24_P254506   | 0,03886721 up    | 1,9550252 PAGE4       | Homo sapiens P antigen family, member 4 (prostate associated) (PAGE4), mRNA [NM_007003]                                                    |
| A_24_P344666   | 0,002971523 up   | 1,5864477 PAK7        | Homo sapiens p21 protein (Cdc42/Rac)-activated kinase 7 (PAK7), transcript variant 1, mRNA [NM_020341]                                     |
| A_23_P161481   | 6,34E-06 down    | -6,7687163 PALD1      | Homo sapiens phosphatase domain containing, paladin 1 (PALD1), mRNA [NM_014431]                                                            |
| A_33_P3423984  | 0,002264323 down | -2,8922403 PALLD      | palladin, cytoskeletal associated protein [Source:HGNC Symbol;Acc:HGNC:17068] [ENST00000508898]                                            |
| A_33_P3258061  | 0,028902292 down | -1,5411907 PALM3      | Homo sapiens paralemmn 3 (PALM3), mRNA [NM_001145028]                                                                                      |
| A_23_P64689    | 0,015131655 up   | 1,6021582 PAN2        | Homo sapiens PAN2 poly(A) specific ribonuclease subunit (PAN2), transcript variant 3, mRNA [NM_014871]                                     |
| A_23_P385938   | 1,24E-05 up      | 1,9873462 PAN3        | Homo sapiens PAN3 poly(A) specific ribonuclease subunit (PAN3), mRNA [NM_175854]                                                           |
| A_33_P3303380  | 8,17E-04 down    | -1,7011992 PARD3      | par-3 family cell polarity regulator [Source:HGNC Symbol;Acc:HGNC:16051] [ENST00000374768]                                                 |
| A_21_P0014253  | 0,01991493 down  | -2,4691706 PARD3-AS1  | Homo sapiens PARD3 antisense RNA 1 (PARD3-AS1), long non-coding RNA [NR_108043]                                                            |
| A_32_P205637   | 0,003827347 up   | 3,0286245 PARD6B      | Homo sapiens par-6 family cell polarity regulator beta (PARD6B), mRNA [NM_032521]                                                          |
| A_33_P3314974  | 6,12E-05 down    | -2,912085 PARD6G-AS1  | Homo sapiens PARD6G antisense RNA 1 (PARD6G-AS1), transcript variant 1, long non-coding RNA [NR_028339]                                    |
| A_23_P147465   | 0,005256948 down | -1,9135871 PARK2      | Homo sapiens parkin RBR E3 ubiquitin protein ligase (PARK2), transcript variant 1, mRNA [NM_004562]                                        |
| A_24_P191781   | 0,036214277 up   | 2,062362 PARM1        | Homo sapiens prostate androgen-regulated mucin-like protein 1 (PARM1), mRNA [NM_015393]                                                    |
| A_32_P144342   | 0,010089459 down | -2,299694 PARP4       | Homo sapiens poly (ADP-ribose) polymerase family, member 4 (PARP4), mRNA [NM_006437]                                                       |
| A_21_P0004005  | 0,04683815 up    | 1,6630085 PART1       | Homo sapiens prostate androgen-regulated transcript 1 (non-protein coding) (PART1), transcript variant 3, long non-coding RNA [NR_028509]  |
| A_33_P3413404  | 4,61E-05 down    | -4,5607347 PARVB      | parvin, beta [Source:HGNC Symbol;Acc:HGNC:14653] [ENST00000402876]                                                                         |
| A_23_P250413   | 0,022017727 down | -2,0139523 PARVG      | Homo sapiens parvin, gamma (PARVG), transcript variant 1, mRNA [NM_022141]                                                                 |
| A_33_P3223338  | 0,0041816 up     | 1,592895 PARVG        | parvin, gamma [Source:HGNC Symbol;Acc:HGNC:14654] [ENST00000453888]                                                                        |
| A_33_P3420904  | 0,041639313 down | -1,7522591 PATE3      | Homo sapiens prostate and testis expressed 3 (PATE3), mRNA [NM_001129883]                                                                  |
| A_24_P211558   | 0,025770394 down | -1,8822757 PATZ1      | Homo sapiens POZ (BTB) and AT hook containing zinc finger 1 (PATZ1), transcript variant 4, mRNA [NM_032051]                                |
| A_23_P414211   | 0,036456045 down | -1,7500744 PAX4       | Homo sapiens paired box 4 (PAX4), mRNA [NM_006193]                                                                                         |
| A_23_P500985   | 2,95E-05 down    | -4,420688 PAX7        | Homo sapiens paired box 7 (PAX7), transcript variant 2, mRNA [NM_013945]                                                                   |
| A_33_P3291579  | 0,014668189 up   | 1,7677433 PAX7        | Homo sapiens paired box 7 (PAX7), transcript variant 3, mRNA [NM_001135254]                                                                |
| A_33_P3231076  | 0,034398902 down | -1,6347736 PAXIP1-AS2 | Homo sapiens PAXIP1 antisense RNA 2 (PAXIP1-AS2), transcript variant 2, long non-coding RNA [NR_024477]                                    |
| A_24_P312519   | 1,89E-04 down    | -3,0984168 PBLD       | Homo sapiens phenazine biosynthesis-like protein domain containing (PBLD), transcript variant 2, mRNA [NM_001033083]                       |
| A_23_P332260   | 0,005954117 down | -3,610085 PBOV1       | Homo sapiens prostate and breast cancer overexpressed 1 (PBOV1), mRNA [NM_021635]                                                          |
| A_24_P173823   | 0,030713713 down | -1,8760438 PBX1       | Homo sapiens pre-B-cell leukemia homeobox 1 (PBX1), transcript variant 1, mRNA [NM_002585]                                                 |
| A_23_P90419    | 0,029757544 up   | 1,8889253 PBX4        | Homo sapiens pre-B-cell leukemia homeobox 4 (PBX4), transcript variant 1, mRNA [NM_025245]                                                 |
| A_24_P79808    | 0,045399994 up   | 1,6084005 PBXIP1      | Homo sapiens pre-B-cell leukemia homeobox interacting protein 1 (PBXIP1), mRNA [NM_020524]                                                 |
| A_33_P3252381  | 0,002013713 up   | 1,669291 PCA3         | Homo sapiens prostate cancer associated 3 (non-protein coding) (PCA3), long non-coding RNA [NR_015342]                                     |
| A_33_P3219095  | 0,003217471 up   | 1,571677 PCAT18       | Homo sapiens prostate cancer associated transcript 18 (non-protein coding) (PCAT18), long non-coding RNA [NR_024259]                       |
| A_19_P00320718 | 0,021550383 down | -1,6819419 PCAT19     | Homo sapiens prostate cancer associated transcript 19 (non-protein coding) (PCAT19), long non-coding RNA [NR_040109]                       |
| A_19_P00315824 | 0,003078699 down | -2,0715327 PCAT19     | Homo sapiens prostate cancer associated transcript 19 (non-protein coding) (PCAT19), long non-coding RNA [NR_040109]                       |
| A_19_P00317660 | 0,006214581 down | -3,5947058 PCAT19     | Homo sapiens prostate cancer associated transcript 19 (non-protein coding) (PCAT19), long non-coding RNA [NR_040109]                       |
| A_19_P00808044 | 0,005521487 up   | 1,7006618 PCAT19      | Homo sapiens prostate cancer associated transcript 19 (non-protein coding) (PCAT19), long non-coding RNA [NR_040109]                       |
| A_21_P0008650  | 0,012084872 up   | 1,9711802 PCAT29      | Homo sapiens prostate cancer associated transcript 29 (non-protein coding) (PCAT29), transcript variant 2, long non-coding RNA [NR_126438] |
| A_33_P3224362  | 0,008755856 up   | 2,0739584 PCBP3       | Homo sapiens poly(rC) binding protein 3 (PCBP3), transcript variant 1, mRNA [NM_020528]                                                    |
| A_33_P3251647  | 0,014974359 up   | 1,8740684 PCBP3-OT1   | Homo sapiens cDNA FLJ44028 fis, clone TEST14027516. [AK126016]                                                                             |

|               |                  |                       |                                                                                                                          |
|---------------|------------------|-----------------------|--------------------------------------------------------------------------------------------------------------------------|
| A_33_P3403887 | 0,04875271 up    | 1,5811639 PCDH11X     | protocadherin 11 X-linked [Source:HGNC Symbol;Acc:HGNC:8656] [ENST00000361724]                                           |
| A_23_P161331  | 0,031913448 up   | 1,7783332 PCDH15      | Homo sapiens protocadherin-related 15 (PCDH15), transcript variant C, mRNA [NM_033056]                                   |
| A_33_P3258244 | 0,020784264 up   | 1,520716 PCDH15       | Homo sapiens protocadherin-related 15 (PCDH15), transcript variant K, mRNA [NM_001142771]                                |
| A_24_P111147  | 0,028626699 up   | 1,5527307 PCDH15      | protocadherin-related 15 [Source:HGNC Symbol;Acc:HGNC:14674] [ENST00000373955]                                           |
| A_33_P3225760 | 0,004955962 up   | 1,5228286 PCDH18      | Homo sapiens protocadherin 18 (PCDH18), transcript variant 2, mRNA [NM_001300828]                                        |
| A_33_P3250348 | 0,009171628 up   | 1,8104873 PCDH18      | Homo sapiens protocadherin 18 (PCDH18), transcript variant 1, mRNA [NM_019035]                                           |
| A_24_P419039  | 0,004960642 down | -2,0291567 PCDH19     | Homo sapiens protocadherin 19 (PCDH19), transcript variant 2, mRNA [NM_020766]                                           |
| A_23_P204885  | 0,028828025 up   | 1,7656273 PCDH20      | Homo sapiens protocadherin 20 (PCDH20), mRNA [NM_022843]                                                                 |
| A_23_P420236  | 0,00430319 up    | 1,5252738 PCDH9       | Homo sapiens protocadherin 9 (PCDH9), transcript variant 1, mRNA [NM_203487]                                             |
| A_33_P3258546 | 1,88E-05 down    | -3,6776645 PCDHA5     | Homo sapiens protocadherin alpha 5 (PCDHA5), transcript variant 2, mRNA [NM_031501]                                      |
| A_33_P3250695 | 0,012835939 up   | 2,3197448 PCDHA8      | Homo sapiens protocadherin alpha 8 (PCDHA8), transcript variant 2, mRNA [NM_031856]                                      |
| A_32_P932089  | 0,004047099 up   | 1,5281701 PCDHB19P    | Homo sapiens protocadherin beta 19 pseudogene (PCDHB19P), non-coding RNA [NR_001282]                                     |
| A_24_P251962  | 0,005186366 down | -1,8046378 PCDHB2     | Homo sapiens protocadherin beta 2 (PCDHB2), mRNA [NM_018936]                                                             |
| A_23_P81262   | 5,64E-04 down    | -2,4929066 PCDHB4     | Homo sapiens protocadherin beta 4 (PCDHB4), mRNA [NM_018938]                                                             |
| A_23_P41599   | 0,001876269 down | -2,7657032 PCDHB8     | Homo sapiens protocadherin beta 8 (PCDHB8), mRNA [NM_019120]                                                             |
| A_24_P308851  | 0,008575876 down | -1,5936902 PCDHGA7    | Homo sapiens protocadherin gamma subfamily A, 7 (PCDHGA7), transcript variant 2, mRNA [NM_032087]                        |
| A_23_P435444  | 0,001924096 down | -1,5704226 PCDHGA7    | Homo sapiens protocadherin gamma subfamily A, 7 (PCDHGA7), transcript variant 2, mRNA [NM_032087]                        |
| A_33_P3417611 | 4,27E-05 down    | -3,1261234 PCDHGB1    | Homo sapiens protocadherin gamma subfamily B, 1 (PCDHGB1), transcript variant 2, mRNA [NM_032095]                        |
| A_33_P3410981 | 1,46E-04 down    | -1,8189934 PCDHGB7    | Homo sapiens protocadherin gamma subfamily B, 7 (PCDHGB7), transcript variant 2, mRNA [NM_032101]                        |
| A_23_P303101  | 5,35E-04 down    | -3,676147 PCDHGC4     | Homo sapiens protocadherin gamma subfamily C, 4 (PCDHGC4), transcript variant 2, mRNA [NM_032406]                        |
| A_23_P115703  | 0,001392821 up   | 1,6541017 PCGF6       | Homo sapiens polycomb group ring finger 6 (PCGF6), transcript variant 1, mRNA [NM_001011663]                             |
| A_21_P0013977 | 8,71E-04 up      | 1,8891376 PCID2       | PCI domain containing 2 [Source:HGNC Symbol;Acc:HGNC:25653] [ENST00000493650]                                            |
| A_23_P210496  | 0,014724569 down | -1,6505382 PCIF1      | Homo sapiens PDX1 C-terminal inhibiting factor 1 (PCIF1), mRNA [NM_022104]                                               |
| A_24_P247902  | 0,011761056 down | -2,4332666 PCLO       | Homo sapiens piccolo presynaptic cytomatrix protein (PCLO), transcript variant 2, mRNA [NM_014510]                       |
| A_33_P3249529 | 7,27E-04 down    | -2,2273586 PCNX       | Homo sapiens pecanex homolog (Drosophila) (PCNX), mRNA [NM_014982]                                                       |
| A_23_P114585  | 0,023721797 down | -2,0653741 PCNXL2     | pecanex-like 2 (Drosophila) [Source:HGNC Symbol;Acc:HGNC:8736] [ENST00000324142]                                         |
| A_21_P0000835 | 0,043082505 up   | 1,6880795 PCOLCE-AS1  | Homo sapiens PCOLCE antisense RNA 1 (PCOLCE-AS1), long non-coding RNA [NR_038910]                                        |
| A_24_P399500  | 0,014807835 down | -1,5888704 PCP2       | Homo sapiens Purkinje cell protein 2 (PCP2), transcript variant 1, mRNA [NM_174895]                                      |
| A_23_P109322  | 0,013266861 down | -2,1013622 PCP4       | Homo sapiens Purkinje cell protein 4 (PCP4), mRNA [NM_006198]                                                            |
| A_33_P3358735 | 0,002008024 up   | 3,3392859 PCSK5       | Homo sapiens proprotein convertase subtilisin/kexin type 5 (PCSK5), transcript variant 1, mRNA [NM_001190482]            |
| A_21_P0011001 | 3,65E-04 up      | 1,8690726 PCSK7       | Homo sapiens proprotein convertase subtilisin/kexin type 7 (PCSK7), mRNA [NM_004716]                                     |
| A_21_P0013958 | 0,014385906 down | -1,5298827 PDCD6      | programmed cell death 6 [Source:HGNC Symbol;Acc:HGNC:8765] [ENST00000512466]                                             |
| A_21_P0003089 | 0,01776953 up    | 1,5166916 PDCD6       | Homo sapiens programmed cell death 6 (PDCD6), transcript variant 6, non-coding RNA [NR_073609]                           |
| A_33_P3258127 | 0,001475319 down | -2,389518 PDE10A      | phosphodiesterase 10A [Source:HGNC Symbol;Acc:HGNC:8772] [ENST00000616273]                                               |
| A_23_P356677  | 0,012655777 up   | 1,8258493 PDE10A      | Homo sapiens phosphodiesterase 10A (PDE10A), transcript variant 1, mRNA [NM_001130690]                                   |
| A_23_P401106  | 0,010485435 down | -2,174857 PDE2A       | Homo sapiens phosphodiesterase 2A, cGMP-stimulated (PDE2A), transcript variant 1, mRNA [NM_002599]                       |
| A_23_P208334  | 0,00983901 up    | 3,0731218 PDE4A       | Homo sapiens phosphodiesterase 4A, cAMP-specific (PDE4A), transcript variant 4, mRNA [NM_006202]                         |
| A_33_P3389658 | 0,03572454 down  | -1,835731 PDE4D       | Homo sapiens phosphodiesterase 4D, cAMP-specific (PDE4D), transcript variant 3, mRNA [NM_001165899]                      |
| A_33_P3240552 | 0,0343672 up     | 2,0277257 PDE4D       | phosphodiesterase 4D, cAMP-specific [Source:HGNC Symbol;Acc:HGNC:8783] [ENST00000509355]                                 |
| A_33_P3372666 | 0,011251126 down | -1,5109837 PDGFA      | Homo sapiens platelet-derived growth factor alpha polypeptide (PDGFA), transcript variant 2, mRNA [NM_033023]            |
| A_24_P339944  | 0,048677154 up   | 2,206824 PDGFB        | Homo sapiens platelet-derived growth factor beta polypeptide (PDGFB), transcript variant 1, mRNA [NM_002608]             |
| A_23_P250478  | 0,008366736 down | -1,5788321 PDK3       | Homo sapiens pyruvate dehydrogenase kinase, isozyme 3 (PDK3), transcript variant 2, mRNA [NM_005391]                     |
| A_33_P3419383 | 0,008829522 up   | 1,502299 PDLIM3       | Homo sapiens PDZ and LIM domain 3 (PDLIM3), transcript variant 1, mRNA [NM_014476]                                       |
| A_33_P3357964 | 0,013986516 down | -1,7802666 PDPK1      | Homo sapiens PRO0461 mRNA, complete cds. [AF111845]                                                                      |
| A_24_P830690  | 5,89E-04 up      | 1,7382834 PDPK1       | Homo sapiens 3-phosphoinositide dependent protein kinase 1 (PDPK1), transcript variant 1, mRNA [NM_002613]               |
| A_33_P3319113 | 0,014818827 down | -1,6750504 PDPR       | Homo sapiens pyruvate dehydrogenase phosphatase regulatory subunit (PDPR), mRNA [NM_017990]                              |
| A_33_P3311653 | 0,001040948 up   | 1,9118632 PDSSA       | PDSS, regulator of cohesion maintenance, homolog A (S. cerevisiae) [Source:HGNC Symbol;Acc:HGNC:29088] [ENST00000507766] |
| A_23_P161152  | 0,04840581 up    | 1,540339 PDSS1        | Homo sapiens prenyl (decaprenyl) diphosphate synthase, subunit 1 (PDSS1), mRNA [NM_014317]                               |
| A_23_P134167  | 4,32E-04 up      | 1,7929859 PDSS2       | Homo sapiens prenyl (decaprenyl) diphosphate synthase, subunit 2 (PDSS2), mRNA [NM_020381]                               |
| A_23_P393401  | 0,016259504 up   | 1,5272396 PDXDC2P     | Homo sapiens pyridoxal-dependent decarboxylase domain containing 2, pseudogene (PDXDC2P), non-coding RNA [NR_003610]     |
| A_32_P216872  | 0,005942687 up   | 1,6885954 PDXDC2P     | Homo sapiens mRNA; cDNA DKFZp686B0962 (from clone DKFZp686B0962). [BX647358]                                             |
| A_33_P3374035 | 0,030991394 down | -2,1133242 PDXK       | Homo sapiens cDNA FLJ37311 fis, clone BRAMY2016771. [AK094630]                                                           |
| A_24_P279870  | 0,007958705 up   | 1,5233358 PDYN        | Homo sapiens prodynorphin (PDYN), transcript variant 1, mRNA [NM_024411]                                                 |
| A_23_P7402    | 0,006708093 up   | 2,3129182 PDZD2       | Homo sapiens PDZ domain containing 2 (PDZD2), mRNA [NM_178140]                                                           |
| A_33_P3283515 | 0,027514 up      | 1,6639405 PDZD2       | PDZ domain containing 2 [Source:HGNC Symbol;Acc:HGNC:18486] [ENST00000397559]                                            |
| A_24_P265088  | 0,007923596 down | -2,3056407 PDZD4      | PDZ domain containing 4 [Source:HGNC Symbol;Acc:HGNC:21167] [ENST00000393758]                                            |
| A_23_P412508  | 0,009846273 up   | 1,5751697 PDZD9       | Homo sapiens PDZ domain containing 9 (PDZD9), transcript variant 1, mRNA [NM_173806]                                     |
| A_23_P21618   | 0,012031486 up   | 2,1202831 PDZRN3      | Homo sapiens PDZ domain containing ring finger 3 (PDZRN3), transcript variant 1, mRNA [NM_015009]                        |
| A_33_P3364211 | 0,027863368 down | -1,9330724 PDZRN3-AS1 | Homo sapiens cDNA FLJ44459 fis, clone UTERU2024656. [AK126423]                                                           |
| A_23_P252471  | 0,01806243 up    | 1,7748026 PECAM1      | Homo sapiens platelet/endothelial cell adhesion molecule 1 (PECAM1), mRNA [NM_000442]                                    |
| A_23_P82503   | 0,03747029 down  | -1,8863531 PEG10      | Homo sapiens paternally expressed 10 (PEG10), transcript variant 1, mRNA [NM_001040152]                                  |

|               |                  |                       |                                                                                                                                 |
|---------------|------------------|-----------------------|---------------------------------------------------------------------------------------------------------------------------------|
| A_33_P3316928 | 0,034693643 up   | 1,5084666 PEL11       | Homo sapiens pellino E3 ubiquitin protein ligase 1 (PEL11), mRNA [NM_020651]                                                    |
| A_23_P89589   | 3,76E-07 up      | 2,8826103 PER1        | Homo sapiens period circadian clock 1 (PER1), mRNA [NM_002616]                                                                  |
| A_24_P230948  | 0,04239668 down  | -1,7120575 PER3       | Homo sapiens period circadian clock 3 (PER3), transcript variant 4, mRNA [NM_016831]                                            |
| A_23_P501745  | 0,016275462 down | -1,6327611 PEX10      | Homo sapiens peroxisomal biogenesis factor 10 (PEX10), transcript variant 1, mRNA [NM_153818]                                   |
| A_23_P402610  | 4,52E-06 up      | 3,0052128 PFAS        | Homo sapiens phosphoribosylformylglycinamide synthase (PFAS), mRNA [NM_012393]                                                  |
| A_24_P413669  | 0,013960704 up   | 2,3087158 PFKFB2      | Homo sapiens 6-phosphofructo-2-kinase/fructose-2,6-biphosphatase 2 (PFKFB2), transcript variant 2, mRNA [NM_001018053]          |
| A_24_P261259  | 7,48E-05 up      | 2,1152768 PFKFB3      | Homo sapiens 6-phosphofructo-2-kinase/fructose-2,6-biphosphatase 3 (PFKFB3), transcript variant 1, mRNA [NM_004566]             |
| A_23_P29079   | 0,003608244 down | -1,8552675 PFKL       | Homo sapiens phosphofructokinase, liver (PFKL), transcript variant 1, mRNA [NM_001002021]                                       |
| A_33_P3413962 | 5,42E-04 up      | 2,0275688 PFKP        | Homo sapiens phosphofructokinase, platelet (PFKP), transcript variant 2, mRNA [NM_001242339]                                    |
| A_23_P46928   | 0,008706077 up   | 1,5142171 PFKP        | Homo sapiens phosphofructokinase, platelet (PFKP), transcript variant 1, mRNA [NM_002627]                                       |
| A_23_P350059  | 4,36E-05 down    | -2,3271964 PFN1P2     | Homo sapiens profilin 1 pseudogene 2 (PFN1P2), non-coding RNA [NR_003242]                                                       |
| A_33_P3345743 | 6,16E-04 up      | 2,3182824 PFN1P2      | Homo sapiens profilin 1 pseudogene 2 (PFN1P2), non-coding RNA [NR_003242]                                                       |
| A_23_P150549  | 0,007538144 down | -2,4910462 PGA3       | Homo sapiens pepsinogen 3, group I (pepsinogen A) (PGA3), mRNA [NM_001079807]                                                   |
| A_23_P79247   | 0,008119736 down | -1,7394718 PGAP1      | Homo sapiens profilin 1 pseudogene 2 (PFN1P2), non-coding RNA [NR_003242]                                                       |
| A_23_P7965    | 0,002947436 down | -2,1705506 PGC        | Homo sapiens pepsinogen 3, group I (pepsinogen A) (PGA3), mRNA [NM_001079807]                                                   |
| A_23_P208747  | 0,01340853 up    | 2,40533 PGLYRP1       | Homo sapiens peptidoglycan recognition protein 1 (PGLYRP1), mRNA [NM_005091]                                                    |
| A_21_P0012083 | 0,004722489 up   | 1,83574 PGM5P4-AS1    | Homo sapiens PGM5P4 antisense RNA 1 (PGM5P4-AS1), transcript variant 1, long non-coding RNA [NR_121185]                         |
| A_32_P3534    | 0,012823317 down | -2,356194 PGPEP1L     | Homo sapiens pyroglutamyl-peptidase I-like (PGPEP1L), transcript variant 2, mRNA [NM_001167902]                                 |
| A_24_P943566  | 0,027239794 up   | 2,0895507 PHACTR1     | phosphatase and actin regulator 1 [Source:HGNC Symbol;Acc:HGNC:20990] [ENST00000379350]                                         |
| A_23_P28834   | 3,16E-05 up      | 11,316884 PHACTR3     | Homo sapiens phosphatase and actin regulator 3 (PHACTR3), transcript variant 1, mRNA [NM_080672]                                |
| A_33_P3289371 | 0,001038251 up   | 5,7130313 PHACTR3     | phosphatase and actin regulator 3 [Source:HGNC Symbol;Acc:HGNC:15833] [ENST00000492611]                                         |
| A_24_P119577  | 0,006047097 up   | 1,7302179 PHACTR4     | Homo sapiens phosphatase and actin regulator 4 (PHACTR4), transcript variant 1, mRNA [NM_001048183]                             |
| A_23_P323094  | 4,07E-04 up      | 2,176607 PHC1         | Homo sapiens polyhomeotic homolog 1 (Drosophila) (PHC1), mRNA [NM_004426]                                                       |
| A_23_P423864  | 0,004049486 up   | 1,7042192 PHC2        | Homo sapiens polyhomeotic homolog 2 (Drosophila) (PHC2), transcript variant 1, mRNA [NM_198040]                                 |
| A_23_P34510   | 0,041748386 up   | 1,549929 PHC2         | Homo sapiens polyhomeotic homolog 2 (Drosophila) (PHC2), transcript variant 1, mRNA [NM_198040]                                 |
| A_24_P535219  | 0,001341922 up   | 1,7995362 PHF10       | PHD finger protein 10 [Source:HGNC Symbol;Acc:HGNC:18250] [ENST00000612128]                                                     |
| A_33_P3280666 | 0,031207943 down | -1,5409517 PHF21B     | Homo sapiens PHD finger protein 21B (PHF21B), transcript variant 1, mRNA [NM_138415]                                            |
| A_24_P5550    | 0,013216608 up   | 1,6276022 PHF23       | Homo sapiens PHD finger protein 23 (PHF23), transcript variant 1, mRNA [NM_024297]                                              |
| A_33_P3361925 | 0,001185814 down | -1,9337939 PHF8       | Homo sapiens PHD finger protein 8 (PHF8), transcript variant 4, mRNA [NM_001184898]                                             |
| A_23_P85783   | 0,00733883 down  | -2,3864548 PHGDH      | Homo sapiens phosphoglycerate dehydrogenase (PHGDH), mRNA [NM_006623]                                                           |
| A_24_P238543  | 8,28E-04 down    | -1,7213258 PHKA1      | Homo sapiens phosphorylase kinase, alpha 1 (muscle) (PHKA1), transcript variant 1, mRNA [NM_002637]                             |
| A_23_P159671  | 0,00226331 up    | 1,6186702 PHKA2       | Homo sapiens phosphorylase kinase, alpha 2 (liver) (PHKA2), mRNA [NM_000292]                                                    |
| A_24_P296457  | 1,90E-04 up      | 2,1222544 PHKG2       | Homo sapiens phosphorylase kinase, gamma 2 (testis) (PHKG2), transcript variant 1, mRNA [NM_000294]                             |
| A_33_P3311083 | 0,02253417 up    | 1,6500975 PHLDB3      | pleckstrin homology-like domain, family B, member 3 [Source:HGNC Symbol;Acc:HGNC:30499] [ENST00000599242]                       |
| A_23_P89762   | 3,18E-04 up      | 2,2165082 PHLPP1      | Homo sapiens PH domain and leucine rich repeat protein phosphatase 1 (PHLPP1), mRNA [NM_194449]                                 |
| A_23_P418234  | 0,013928336 up   | 1,6650499 PHLPP2      | Homo sapiens PH domain and leucine rich repeat protein phosphatase 2 (PHLPP2), transcript variant 1, mRNA [NM_015020]           |
| A_33_P3353295 | 0,005745086 up   | 1,6120979 PHOX2A      | Homo sapiens paired-like homeobox 2a (PHOX2A), mRNA [NM_005169]                                                                 |
| A_33_P3709173 | 0,005157729 up   | 1,5992016 PHTF2       | Homo sapiens putative homeodomain transcription factor 2 (PHTF2), transcript variant 5, mRNA [NM_001127360]                     |
| A_21_P0012340 | 0,041691776 up   | 1,5147142 PI4KA       | Homo sapiens phosphatidylinositol 4-kinase, catalytic, alpha (PI4KA), mRNA [NM_058004]                                          |
| A_24_P248185  | 9,65E-05 down    | -2,3683958 PIANP      | Homo sapiens PILR alpha associated neural protein (PIANP), transcript variant 1, mRNA [NM_153685]                               |
| A_24_P48627   | 0,017477155 down | -2,518895 PIAS4       | protein inhibitor of activated STAT, 4 [Source:HGNC Symbol;Acc:HGNC:17002] [ENST00000262971]                                    |
| A_33_P3382157 | 0,002631512 up   | 1,7129724 PICALM      | Homo sapiens phosphatidylinositol binding clathrin assembly protein (PICALM), transcript variant 1, mRNA [NM_007166]            |
| A_23_P130376  | 0,001480201 down | -1,7383962 PIEZO2     | Homo sapiens piezo-type mechanosensitive ion channel component 2 (PIEZO2), mRNA [NM_022068]                                     |
| A_21_P0011651 | 0,021153457 up   | 2,3383312 PIEZO2      | Homo sapiens piezo-type mechanosensitive ion channel component 2 (PIEZO2), mRNA [NM_022068]                                     |
| A_33_P3351150 | 0,01559881 up    | 2,7126348 PIEZO2      | Homo sapiens piezo-type mechanosensitive ion channel component 2 (PIEZO2), mRNA [NM_022068]                                     |
| A_23_P424900  | 0,023848668 down | -2,184422 PIFO        | Homo sapiens primary cilia formation (PIFO), transcript variant 1, mRNA [NM_181643]                                             |
| A_23_P77174   | 0,005043936 up   | 1,6191792 PIGB        | Homo sapiens phosphatidylinositol glycan anchor biosynthesis, class B (PIGB), mRNA [NM_004855]                                  |
| A_23_P136547  | 0,011616493 up   | 1,616075 PIGG         | Homo sapiens phosphatidylinositol glycan anchor biosynthesis, class G (PIGG), transcript variant 2, mRNA [NM_017733]            |
| A_33_P3278058 | 0,025202228 down | -2,7829816 PIH1D2     | Homo sapiens PIH1 domain containing 2 (PIH1D2), transcript variant 1, mRNA [NM_138789]                                          |
| A_33_P3419419 | 0,007618399 down | -1,6212959 PIK3C2B    | phosphatidylinositol-4-phosphate 3-kinase, catalytic subunit type 2 beta [Source:HGNC Symbol;Acc:HGNC:8972] [ENST00000367184]   |
| A_33_P3789056 | 0,001307792 down | -1,6110413 PIK3CD-AS1 | Homo sapiens PIK3CD antisense RNA 1 (PIK3CD-AS1), long non-coding RNA [NR_027045]                                               |
| A_24_P29401   | 0,010532326 up   | 1,5958288 PIK3R1      | Homo sapiens phosphoinositide-3-kinase, regulatory subunit 1 (alpha) (PIK3R1), transcript variant 1, mRNA [NM_181523]           |
| A_24_P943957  | 4,65E-05 up      | 1,9155309 PIKIFYVE    | Homo sapiens phosphoinositide kinase, FYVE finger containing (PIKIFYVE), transcript variant 2, mRNA [NM_015040]                 |
| A_23_P345118  | 0,008579648 up   | 1,9835274 PIM1        | Homo sapiens Pim-1 proto-oncogene, serine/threonine kinase (PIM1), transcript variant 1, mRNA [NM_002648]                       |
| A_23_P61398   | 0,010092692 up   | 1,5026766 PIM3        | Homo sapiens Pim-3 proto-oncogene, serine/threonine kinase (PIM3), mRNA [NM_001001852]                                          |
| A_23_P330262  | 0,002615545 up   | 1,8486665 PIP5K1C     | Homo sapiens phosphatidylinositol-4-phosphate 5-kinase, type I, gamma (PIP5K1C), transcript variant 2, mRNA [NM_012398]         |
| A_23_P143662  | 2,76E-04 up      | 2,1444888 PISD        | Homo sapiens phosphatidylserine decarboxylase (PISD), mRNA [NM_014338]                                                          |
| A_21_P0000517 | 0,002071011 up   | 2,0599625 PISRT1      | Homo sapiens polled intersex syndrome regulated transcript 1 (non-protein coding RNA) (PISRT1), long non-coding RNA [NR_027070] |
| A_23_P200073  | 0,036677163 up   | 1,540191 PITHD1       | Homo sapiens PITH (C-terminal proteasome-interacting domain of thioredoxin-like) domain containing 1 (PITHD1), mRNA [NM_020362] |
| A_23_P401361  | 1,83E-04 up      | 1,9786284 PITPNM2     | Homo sapiens phosphatidylinositol transfer protein, membrane-associated 2 (PITPNM2), transcript variant 1, mRNA [NM_020845]     |
| A_33_P3342561 | 1,19E-05 down    | -2,7735965 PTPN3      | Homo sapiens PTPNM family member 3 (PTPNM3), transcript variant 1, mRNA [NM_031220]                                             |

|               |             |      |            |           |                                                                                                                                           |
|---------------|-------------|------|------------|-----------|-------------------------------------------------------------------------------------------------------------------------------------------|
| A_33_P3240318 | 0,002864732 | down | -1,6037807 | PITX3     | Homo sapiens paired-like homeodomain 3 (PITX3), mRNA [NM_005029]                                                                          |
| A_21_P0014687 | 0,007259573 | down | -1,5874139 | PKD1      | Homo sapiens polycystic kidney disease 1 (autosomal dominant) (PKD1), transcript variant 2, mRNA [NM_000296]                              |
| A_33_P3812815 | 6,62E-04    | down | -1,9907733 | PKD1      | Homo sapiens polycystic kidney disease 1 (autosomal dominant) (PKD1), transcript variant 2, mRNA [NM_000296]                              |
| A_21_P0011655 | 8,83E-04    | up   | 1,7210083  | PKD1P6    | Homo sapiens polycystic kidney disease 1 (autosomal dominant) pseudogene 6 (PKD1P6), non-coding RNA [NR_123722]                           |
| A_33_P3247325 | 0,002702415 | up   | 1,7831905  | PKDL2L2   | Homo sapiens polycystic kidney disease 2-like 2 (PKDL2L2), transcript variant 4, mRNA [NM_001300921]                                      |
| A_33_P3387420 | 0,004623193 | up   | 1,5654238  | PKHD1     | Homo sapiens polycystic kidney and hepatic disease 1 (autosomal recessive) (PKHD1), transcript variant 1, mRNA [NM_138694]                |
| A_23_P402187  | 0,008243315 | up   | 1,6691083  | PKHD1     | Homo sapiens polycystic kidney and hepatic disease 1 (autosomal recessive) (PKHD1), transcript variant 1, mRNA [NM_138694]                |
| A_23_P31765   | 0,021783268 | down | -2,1397429 | PKIA      | Homo sapiens protein kinase (cAMP-dependent, catalytic) inhibitor alpha (PKIA), transcript variant 1, mRNA [NM_006823]                    |
| A_33_P3310293 | 0,005859711 | down | -1,5357149 | PKIG      | Homo sapiens protein kinase (cAMP-dependent, catalytic) inhibitor gamma (PKIG), transcript variant 1, mRNA [NM_181805]                    |
| A_24_P387869  | 0,002091981 | up   | 1,5989832  | PKN2      | Homo sapiens protein kinase N2 (PKN2), mRNA [NM_006256]                                                                                   |
| A_33_P3242829 | 2,41E-04    | up   | 2,6164134  | PKN2      | protein kinase N2 [Source:HGNC Symbol;Acc:HGNC:9406] [ENST00000370505]                                                                    |
| A_33_P3220202 | 0,001581906 | up   | 1,8978763  | PKN3      | Homo sapiens protein kinase N3 (PKN3), mRNA [NM_013355]                                                                                   |
| A_33_P3405728 | 0,024912672 | up   | 1,5251138  | PKP2      | Homo sapiens plakophilin 2 (PKP2), transcript variant 2b, mRNA [NM_004572]                                                                |
| A_21_P0011456 | 0,005465929 | down | -1,5533979 | PLA2G10   | Homo sapiens phospholipase A2, group X (PLA2G10), mRNA [NM_003561]                                                                        |
| A_23_P388150  | 0,006930857 | up   | 2,5955443  | PLA2G12B  | Homo sapiens phospholipase A2, group XIIb (PLA2G12B), mRNA [NM_032562]                                                                    |
| A_33_P3350423 | 0,018960243 | up   | 1,6337966  | PLA2G2E   | Homo sapiens phospholipase A2, group IIE (PLA2G2E), mRNA [NM_014589]                                                                      |
| A_33_P3241316 | 0,034178782 | down | -2,097993  | PLA2G4F   | Homo sapiens phospholipase A2, group IVF (PLA2G4F), transcript variant 1, mRNA [NM_213600]                                                |
| A_23_P103465  | 0,008002033 | down | -1,8436462 | PLA2G5    | Homo sapiens phospholipase A2, group V (PLA2G5), mRNA [NM_000929]                                                                         |
| A_24_P78161   | 0,014255478 | up   | 1,5105289  | PLAA      | Homo sapiens phospholipase A2-activating protein (PLAA), mRNA [NM_001031689]                                                              |
| A_33_P3282162 | 0,001037008 | down | -2,8853543 | PLAC4     | Homo sapiens placenta-specific 4 (PLAC4), mRNA [NM_182832]                                                                                |
| A_33_P3241989 | 0,015413621 | up   | 1,7271894  | PLAC8     | Homo sapiens placenta-specific 8 (PLAC8), transcript variant 3, mRNA [NM_001130715]                                                       |
| A_33_P3252785 | 0,03483657  | down | -1,8490459 | PLAC9     | placenta-specific 9 [Source:HGNC Symbol;Acc:HGNC:19255] [ENST00000372263]                                                                 |
| A_33_P3252781 | 0,006999389 | up   | 1,5099521  | PLAC9     | Homo sapiens placenta-specific 9 (PLAC9), mRNA [NM_001012973]                                                                             |
| A_33_P3335825 | 0,006159968 | up   | 3,4049203  | PLCD4     | phospholipase C, delta 4 [Source:HGNC Symbol;Acc:HGNC:9062] [ENST00000483685]                                                             |
| A_23_P35617   | 0,04928663  | up   | 2,0297616  | PLCE1     | Homo sapiens phospholipase C, epsilon 1 (PLCE1), transcript variant 1, mRNA [NM_016341]                                                   |
| A_33_P3327041 | 0,00337179  | up   | 1,643299   | PLCE1-AS1 | Homo sapiens PLCE1 antisense RNA 1 (PLCE1-AS1), long non-coding RNA [NR_033969]                                                           |
| A_23_P254801  | 6,01E-04    | up   | 2,3588884  | PLCG1     | Homo sapiens phospholipase C, gamma 1 (PLCG1), transcript variant 1, mRNA [NM_002660]                                                     |
| A_33_P3334180 | 9,84E-05    | down | -2,8763728 | PLCH2     | phospholipase C, eta 2 [Source:HGNC Symbol;Acc:HGNC:29037] [ENST00000473964]                                                              |
| A_33_P3214339 | 0,001968356 | down | -2,0089598 | PLCXD2    | Homo sapiens phosphatidylinositol-specific phospholipase C, X domain containing 2 (PLCXD2), transcript variant 2, mRNA [NM_153268]        |
| A_23_P88222   | 0,005266823 | down | -2,2301295 | PLD4      | Homo sapiens phospholipase D family, member 4 (PLD4), mRNA [NM_138790]                                                                    |
| A_23_P510     | 6,25E-04    | up   | 3,4387665  | PLD5      | Homo sapiens phospholipase D family, member 5 (PLD5), transcript variant 1, mRNA [NM_152666]                                              |
| A_21_P0010918 | 0,025708783 | up   | 2,9363875  | PLD5      | Homo sapiens phospholipase D family, member 5 (PLD5), transcript variant 1, mRNA [NM_152666]                                              |
| A_33_P3339860 | 0,010629199 | up   | 1,77938    | PLEKHA2   | Homo sapiens pleckstrin homology domain containing, family A (phosphoinositide binding specific) member 2 (PLEKHA2), mRNA [NM_021623]     |
| A_23_P218068  | 1,26E-04    | up   | 1,9405653  | PLEKHA5   | Homo sapiens pleckstrin homology domain containing, family A member 5 (PLEKHA5), transcript variant 1, mRNA [NM_019012]                   |
| A_23_P431268  | 0,011251616 | up   | 2,27729    | PLEKHA6   | Homo sapiens pleckstrin homology domain containing, family A member 6 (PLEKHA6), mRNA [NM_014935]                                         |
| A_23_P28638   | 0,01534733  | up   | 1,548485   | PLEKHB2   | Homo sapiens pleckstrin homology domain containing, family B (evectins) member 2 (PLEKHB2), transcript variant 2, mRNA [NM_017958]        |
| A_33_P3353767 | 0,013383596 | up   | 2,037659   | PLEKHD1   | Homo sapiens pleckstrin homology domain containing, family D (with coiled-coil domains) member 1 (PLEKHD1), mRNA [NM_001161498]           |
| A_33_P3367471 | 0,004000416 | down | -1,748492  | PLEKHG1   | Homo sapiens pleckstrin homology domain containing, family G (with RhoGef domain) member 1 (PLEKHG1), mRNA [NM_001029884]                 |
| A_23_P323563  | 0,002078316 | up   | 1,650355   | PLEKHG2   | Homo sapiens pleckstrin homology domain containing, family G (with RhoGef domain) member 2 (PLEKHG2), mRNA [NM_022835]                    |
| A_33_P3649715 | 0,012625907 | up   | 1,5498322  | PLEKHG4B  | Homo sapiens pleckstrin homology domain containing, family G (with RhoGef domain) member 4B (PLEKHG4B), mRNA [NM_052909]                  |
| A_23_P152727  | 0,009613545 | up   | 1,5345246  | PLEKHM1   | Homo sapiens pleckstrin homology domain containing, family M (with RUN domain) member 1 (PLEKHM1), transcript variant 1, mRNA [NM_014798] |
| A_33_P3317048 | 0,004779528 | down | -1,9493797 | PLEKHM3   | Homo sapiens pleckstrin homology domain containing, family M, member 3 (PLEKHM3), mRNA [NM_001080475]                                     |
| A_21_P0001706 | 0,012000951 | down | -1,6260571 | PLEKHO1   | pleckstrin homology domain containing, family O member 1 [Source:HGNC Symbol;Acc:HGNC:24310] [ENST00000502767]                            |
| A_33_P3412463 | 0,006222635 | down | -2,668515  | PLEKHS1   | Homo sapiens pleckstrin homology domain containing, family S member 1 (PLEKHS1), transcript variant 2, mRNA [NM_001193434]                |
| A_24_P286951  | 0,007781419 | up   | 3,3770964  | PLEKHS1   | Homo sapiens pleckstrin homology domain containing, family S member 1 (PLEKHS1), transcript variant 4, mRNA [NM_024889]                   |
| A_33_P3309832 | 0,032971818 | up   | 1,8836011  | PLEKHS1   | Homo sapiens pleckstrin homology domain containing, family S member 1 (PLEKHS1), transcript variant 1, mRNA [NM_182601]                   |
| A_23_P26154   | 0,013356475 | up   | 2,4942176  | PLIN1     | Homo sapiens perilipin 1 (PLIN1), transcript variant 1, mRNA [NM_002666]                                                                  |
| A_21_P0014779 | 0,012827786 | up   | 2,008604   | PLIN2     | perilipin 2 [Source:HGNC Symbol;Acc:HGNC:248] [ENST00000494753]                                                                           |
| A_33_P3358824 | 0,03382074  | down | -2,5166667 | PLOD1     | Homo sapiens procollagen-lysine, 2-oxoglutarate 5-dioxygenase 1 (PLOD1), mRNA [NM_000302]                                                 |
| A_23_P211909  | 0,03317228  | up   | 1,5309675  | PLS1      | Homo sapiens plastin 1 (PLS1), transcript variant 2, mRNA [NM_002670]                                                                     |
| A_23_P250607  | 0,001490629 | up   | 1,7490336  | PLS3      | Homo sapiens plastin 3 (PLS3), transcript variant 1, mRNA [NM_005032]                                                                     |
| A_33_P3209885 | 0,033561006 | down | -1,6201117 | PLXDC1    | Homo sapiens plexin domain containing 1 (PLXDC1), mRNA [NM_020405]                                                                        |
| A_23_P57667   | 0,0077576   | up   | 1,6387016  | PLXNA1    | Homo sapiens plexin A1 (PLXNA1), mRNA [NM_032242]                                                                                         |
| A_33_P3413048 | 0,028804734 | up   | 1,6144204  | PLXNA3    | Homo sapiens plexin A3 (PLXNA3), mRNA [NM_017514]                                                                                         |
| A_23_P414958  | 0,033463933 | up   | 1,6636959  | PLXNC1    | Homo sapiens plexin C1 (PLXNC1), transcript variant 1, mRNA [NM_005761]                                                                   |
| A_33_P3490572 | 0,003390943 | up   | 1,5627593  | PM20D1    | Homo sapiens peptidase M20 domain containing 1 (PM20D1), mRNA [NM_152491]                                                                 |
| A_23_P86118   | 0,012181427 | up   | 1,5631951  | PM20D2    | Homo sapiens peptidase M20 domain containing 2 (PM20D2), mRNA [NM_001010853]                                                              |
| A_21_P0013389 | 0,01835113  | down | -1,6778427 | PMS2P9    | Homo sapiens postmeiotic segregation increased 2 pseudogene 9 (PMS2P9), non-coding RNA [NR_028058]                                        |
| A_23_P377094  | 0,034863096 | up   | 2,2095087  | PNMA3     | Homo sapiens paraneoplastic Ma antigen 3 (PNMA3), transcript variant 1, mRNA [NM_013364]                                                  |
| A_33_P3377851 | 9,90E-05    | down | -3,5596654 | PNMAL2    | Homo sapiens paraneoplastic Ma antigen family-like 2 (PNMAL2), mRNA [NM_020709]                                                           |
| A_24_P336853  | 0,012564305 | up   | 1,5715804  | PNO1      | Homo sapiens partner of NOB1 homology (S. cerevisiae) (PNO1), mRNA [NM_020143]                                                            |

|                |             |      |            |             |                                                                                                                                                                         |
|----------------|-------------|------|------------|-------------|-------------------------------------------------------------------------------------------------------------------------------------------------------------------------|
| A_33_P3219870  | 0,007822102 | down | -1,6705767 | PNPLA2      | Homo sapiens patatin-like phospholipase domain containing 2 (PNPLA2), mRNA [NM_020376]                                                                                  |
| A_23_P17914    | 0,025899716 | up   | 1,5280464  | PNPLA3      | Homo sapiens patatin-like phospholipase domain containing 3 (PNPLA3), mRNA [NM_025225]                                                                                  |
| A_33_P3559060  | 1,09E-04    | down | -3,2642949 | PNPLA5      | Homo sapiens patatin-like phospholipase domain containing 5 (PNPLA5), transcript variant 1, mRNA [NM_138814]                                                            |
| A_23_P212284   | 0,001113374 | down | -1,7656411 | POC1A       | Homo sapiens POC1 centriolar protein A (POC1A), transcript variant 1, mRNA [NM_015426]                                                                                  |
| A_23_P368154   | 6,86E-04    | up   | 2,2901745  | PODN        | Homo sapiens podocan (PODN), transcript variant 1, mRNA [NM_153703]                                                                                                     |
| A_23_P63219    | 0,001778208 | up   | 1,5792227  | POGZ        | Homo sapiens pogo transposable element with ZNF domain (POGZ), transcript variant 1, mRNA [NM_015100]                                                                   |
| A_23_P500734   | 8,36E-05    | up   | 2,0432944  | POGZ        | Homo sapiens pogo transposable element with ZNF domain (POGZ), transcript variant 1, mRNA [NM_015100]                                                                   |
| A_33_P3229177  | 0,003255644 | down | -1,5505521 | POLE4       | Homo sapiens polymerase (DNA-directed), epsilon 4, accessory subunit (POLE4), mRNA [NM_019896]                                                                          |
| A_23_P26905    | 0,0107726   | up   | 1,5457387  | POLG2       | Homo sapiens polymerase (DNA directed), gamma 2, accessory subunit (POLG2), mRNA [NM_007215]                                                                            |
| A_23_P422718   | 9,05E-04    | down | -1,8322083 | POLH        | Homo sapiens polymerase (DNA directed), eta (POLH), transcript variant 1, mRNA [NM_006502]                                                                              |
| A_23_P306890   | 0,005746534 | up   | 1,6262025  | POLI        | Homo sapiens polymerase (DNA directed) iota (POLI), mRNA [NM_007195]                                                                                                    |
| A_33_P3391097  | 0,005493749 | up   | 2,3739965  | POLM        | Homo sapiens cDNA FLJ35482 fis, clone SMINT2008133. [AK092801]                                                                                                          |
| A_33_P3339109  | 0,003636692 | down | -1,6478926 | POLR1C      | polymerase (RNA) I polypeptide C, 30kDa [Source:HGNC Symbol;Acc:HGNC:20194] [ENST00000512472]                                                                           |
| A_33_P3383561  | 0,009334689 | up   | 3,3181188  | POLR2F      | polymerase (RNA) II (DNA directed) polypeptide F [Source:HGNC Symbol;Acc:HGNC:9193] [ENST00000443002]                                                                   |
| A_33_P3396459  | 3,32E-07    | down | -3,3470168 | POLR2H      | Homo sapiens polymerase (RNA) II (DNA directed) polypeptide H (POLR2H), transcript variant 5, mRNA [NM_001278714]                                                       |
| A_23_P152181   | 9,56E-04    | up   | 1,6266087  | POLR3E      | Homo sapiens polymerase (RNA) III (DNA directed) polypeptide E (80kD) (POLR3E), transcript variant 1, mRNA [NM_018119]                                                  |
| A_33_P3286041  | 4,18E-04    | up   | 1,8272091  | POLR3E      | Homo sapiens polymerase (RNA) III (DNA directed) polypeptide E (80kD) (POLR3E), transcript variant 1, mRNA [NM_018119]                                                  |
| A_33_P3354344  | 2,81E-04    | down | -3,0413911 | POM121L10P  | Homo sapiens POM121 transmembrane nucleoporin-like 10, pseudogene (POM121L10P), non-coding RNA [NR_024593]                                                              |
| A_33_P3345036  | 0,045314338 | up   | 1,9826753  | POMC        | Homo sapiens proopiomelanocortin (POMC), transcript variant 1, mRNA [NM_001035256]                                                                                      |
| A_33_P3412233  | 0,010413661 | down | -1,6972959 | POMZP3      | Homo sapiens POM121 and ZP3 fusion (POMZP3), transcript variant 2, mRNA [NM_152992]                                                                                     |
| A_33_P3410895  | 0,018700404 | up   | 1,595323   | POR         | P450 (cytochrome) oxidoreductase [Source:HGNC Symbol;Acc:HGNC:9208] [ENST00000421059]                                                                                   |
| A_33_P3882624  | 5,26E-04    | down | -5,584958  | POT1        | Homo sapiens protection of telomeres 1 (POT1), transcript variant 1, mRNA [NM_015450]                                                                                   |
| A_24_P237804   | 0,023608912 | up   | 1,6220411  | POTED       | Homo sapiens POTE ankyrin domain family, member D (POTED), mRNA [NM_174981]                                                                                             |
| A_24_P825874   | 0,002766264 | up   | 2,876811   | POTEI       | Homo sapiens POTE ankyrin domain family, member I (POTEI), mRNA [NM_001277406]                                                                                          |
| A_33_P3835524  | 0,027530218 | down | -1,5526793 | POU2F2      | Homo sapiens POU class 2 homeobox 2 (POU2F2), transcript variant 3, mRNA [NM_001207026]                                                                                 |
| A_23_P114210   | 0,008985997 | down | -2,0641937 | POU3F4      | Homo sapiens POU class 3 homeobox 4 (POU3F4), mRNA [NM_000307]                                                                                                          |
| A_24_P238118   | 2,36E-04    | down | -2,50418   | PP12613     | Homo sapiens uncharacterized LOC100192379 (PP12613), long non-coding RNA [NR_024365]                                                                                    |
| A_33_P3271241  | 0,04998883  | up   | 1,5499318  | PPA1        | Homo sapiens pyrophosphatase (inorganic) 1 (PPA1), mRNA [NM_021129]                                                                                                     |
| A_23_P161338   | 0,009250553 | up   | 1,7846388  | PPA1        | Homo sapiens pyrophosphatase (inorganic) 1 (PPA1), mRNA [NM_021129]                                                                                                     |
| A_19_P00807336 | 0,016940538 | up   | 1,8278276  | PPA1        | Homo sapiens pyrophosphatase (inorganic) 1 (PPA1), mRNA [NM_021129]                                                                                                     |
| A_33_P3219010  | 0,02114601  | down | -1,9349713 | PPA2        | pyrophosphatase (inorganic) 2 [Source:HGNC Symbol;Acc:HGNC:28883] [ENST00000505713]                                                                                     |
| A_33_P3239759  | 0,004494549 | up   | 1,5150144  | PPAN-P2RY11 | Homo sapiens PPAN-P2RY11 readthrough (PPAN-P2RY11), transcript variant 2, mRNA [NM_001198690]                                                                           |
| A_33_P3227079  | 0,012806513 | up   | 2,0812268  | PPAPDC3     | phosphatidic acid phosphatase type 2 domain containing 3 [Source:HGNC Symbol;Acc:HGNC:28174] [ENST00000372261]                                                          |
| A_23_P18447    | 0,036270846 | up   | 2,6246493  | PPARGC1A    | Homo sapiens peroxisome proliferator-activated receptor gamma, coactivator 1 alpha (PPARGC1A), mRNA [NM_013261]                                                         |
| A_33_P3337009  | 0,024584478 | down | -1,5385798 | PPCS        | Homo sapiens phosphopantothencycysteine synthetase (PPCS), transcript variant 4, mRNA [NM_001287507]                                                                    |
| A_33_P3218797  | 0,022143884 | down | -1,9223186 | PPDPF       | pancreatic progenitor cell differentiation and proliferation factor [Source:HGNC Symbol;Acc:HGNC:16142] [ENST00000370177]                                               |
| A_23_P75516    | 4,03E-04    | up   | 1,6696042  | PPFIA1      | Homo sapiens protein tyrosine phosphatase, receptor type, f polypeptide (PTPRF), interacting protein (liprin), alpha 1 (PPFIA1), transcript variant 2, mRNA [NM_003626] |
| A_21_P0013956  | 0,002213354 | down | -2,0344625 | PPFIA4      | protein tyrosine phosphatase, receptor type, f polypeptide (PTPRF), interacting protein (liprin), alpha 4 [Source:HGNC Symbol;Acc:HGNC:9248] [ENST00000601609]          |
| A_23_P420692   | 0,028761214 | up   | 1,8647918  | PPFIA4      | protein tyrosine phosphatase, receptor type, f polypeptide (PTPRF), interacting protein (liprin), alpha 4 [Source:HGNC Symbol;Acc:HGNC:9248] [ENST00000295706]          |
| A_33_P3239122  | 0,002340429 | down | -1,80979   | PPIH        | peptidylprolyl isomerase H (cyclophilin H) [Source:HGNC Symbol;Acc:HGNC:14651] [ENST00000372550]                                                                        |
| A_33_P3239123  | 0,017964281 | down | -1,7453872 | PPIH        | peptidylprolyl isomerase H (cyclophilin H) [Source:HGNC Symbol;Acc:HGNC:14651] [ENST00000372550]                                                                        |
| A_23_P409553   | 1,90E-04    | up   | 1,8715402  | PPM1A       | Homo sapiens protein phosphatase, Mg2+/Mn2+ dependent, 1A (PPM1A), transcript variant 2, mRNA [NM_177951]                                                               |
| A_33_P3407746  | 0,001197049 | up   | 1,9412636  | PPM1B       | Homo sapiens protein phosphatase, Mg2+/Mn2+ dependent, 1B (PPM1B), transcript variant 2, mRNA [NM_177968]                                                               |
| A_24_P405298   | 0,004236244 | up   | 1,8039216  | PPP1CB      | Homo sapiens protein phosphatase 1, catalytic subunit, beta isozyme (PPP1CB), transcript variant 1, mRNA [NM_002709]                                                    |
| A_23_P204423   | 2,79E-04    | up   | 1,9984902  | PPP1CC      | Homo sapiens protein phosphatase 1, catalytic subunit, gamma isozyme (PPP1CC), transcript variant 1, mRNA [NM_002710]                                                   |
| A_33_P3257607  | 0,004009144 | down | -1,7324524 | PPP1R12B    | Homo sapiens protein phosphatase 1, regulatory subunit 12B (PPP1R12B), transcript variant 7, mRNA [NM_001197131]                                                        |
| A_33_P3335682  | 1,62E-04    | down | -2,8168273 | PPP1R14A    | Homo sapiens protein phosphatase 1, regulatory (inhibitor) subunit 14A (PPP1R14A), transcript variant 1, mRNA [NM_033256]                                               |
| A_23_P45011    | 0,030808013 | up   | 1,5255541  | PPP1R14C    | Homo sapiens protein phosphatase 1, regulatory (inhibitor) subunit 14C (PPP1R14C), mRNA [NM_030949]                                                                     |
| A_23_P352535   | 0,001242077 | down | -2,8062792 | PPP1R16B    | Homo sapiens protein phosphatase 1, regulatory subunit 16B (PPP1R16B), transcript variant 1, mRNA [NM_015568]                                                           |
| A_23_P331479   | 0,015057822 | up   | 1,7213936  | PPP1R18     | Homo sapiens protein phosphatase 1, regulatory subunit 18 (PPP1R18), transcript variant 1, mRNA [NM_133471]                                                             |
| A_24_P13285    | 0,007212185 | down | -2,9211314 | PPP1R1A     | Homo sapiens protein phosphatase 1, regulatory (inhibitor) subunit 1A (PPP1R1A), mRNA [NM_006741]                                                                       |
| A_33_P3215720  | 0,020530097 | down | -1,8140057 | PPP1R2      | Homo sapiens protein phosphatase 1, regulatory (inhibitor) subunit 2 (PPP1R2), transcript variant 1, mRNA [NM_001291504]                                                |
| A_33_P3306964  | 0,007206157 | down | -1,666151  | PPP1R2      | Homo sapiens protein phosphatase 1, regulatory (inhibitor) subunit 2 (PPP1R2), transcript variant 2, mRNA [NM_006241]                                                   |
| A_24_P68819    | 0,001995967 | up   | 1,8159274  | PPP1R21     | Homo sapiens protein phosphatase 1, regulatory subunit 21 (PPP1R21), transcript variant 2, mRNA [NM_152994]                                                             |
| A_23_P90895    | 0,014892142 | up   | 1,6611626  | PPP1R21     | Homo sapiens protein phosphatase 1, regulatory subunit 21 (PPP1R21), transcript variant 2, mRNA [NM_152994]                                                             |
| A_23_P146497   | 2,73E-04    | up   | 1,6345544  | PPP1R26     | Homo sapiens protein phosphatase 1, regulatory subunit 26 (PPP1R26), mRNA [NM_014811]                                                                                   |
| A_33_P3231771  | 0,005032578 | down | -2,3496358 | PPP1R2P3    | Homo sapiens protein phosphatase 1, regulatory (inhibitor) subunit 2 pseudogene 3 (PPP1R2P3), non-coding RNA [NR_038443]                                                |
| A_33_P3344673  | 0,004274461 | up   | 1,8455278  | PPP1R37     | Homo sapiens protein phosphatase 1, regulatory subunit 37 (PPP1R37), mRNA [NM_019121]                                                                                   |
| A_21_P0005852  | 0,019251255 | down | -1,8068202 | PPP1R42     | protein phosphatase 1, regulatory subunit 42 [Source:HGNC Symbol;Acc:HGNC:33732] [ENST00000521040]                                                                      |
| A_24_P139773   | 0,002977596 | down | -1,5707839 | PPP1R8      | Homo sapiens protein phosphatase 1, regulatory subunit 8 (PPP1R8), transcript variant 2, mRNA [NM_138558]                                                               |
| A_23_P122041   | 0,023907878 | up   | 1,6683453  | PPP2CA      | Homo sapiens protein phosphatase 2, catalytic subunit, alpha isozyme (PPP2CA), mRNA [NM_002715]                                                                         |

|               |             |      |            |             |                                                                                                                                       |
|---------------|-------------|------|------------|-------------|---------------------------------------------------------------------------------------------------------------------------------------|
| A_23_P213620  | 0,013498493 | down | -2,5574756 | PPP2R2B     | Homo sapiens protein phosphatase 2, regulatory subunit B, beta (PPP2R2B), transcript variant 10, mRNA [NM_001271948]                  |
| A_21_P0000166 | 0,00177455  | down | -2,5599337 | PPP5D1      | Homo sapiens PPP5 tetrapeptide repeat domain containing 1 (PPP5D1), mRNA [NM_001205281]                                               |
| A_24_P276628  | 4,84E-04    | down | -1,8983158 | PPT1        | Homo sapiens palmitoyl-protein thioesterase 1 (PPT1), transcript variant 1, mRNA [NM_000310]                                          |
| A_23_P306933  | 0,005549007 | up   | 1,5090388  | PPTC7       | Homo sapiens PTC7 protein phosphatase homolog (S. cerevisiae) (PPTC7), mRNA [NM_139283]                                               |
| A_23_P207336  | 0,002166893 | down | -3,1298516 | PPY         | Homo sapiens pancreatic polypeptide (PPY), mRNA [NM_002722]                                                                           |
| A_33_P3245824 | 0,04817495  | up   | 1,5524832  | PQLC1       | Homo sapiens PQ loop repeat containing 1 (PQLC1), transcript variant 1, mRNA [NM_025078]                                              |
| A_33_P3253440 | 0,002096746 | down | -1,6953993 | PQLC3       | Homo sapiens PQ loop repeat containing 3 (PQLC3), transcript variant 1, mRNA [NM_152391]                                              |
| A_33_P3308456 | 6,86E-06    | down | -4,3014083 | PRAC2       | Homo sapiens prostate cancer susceptibility candidate 2 (PRAC2), transcript variant 2, mRNA [NM_001282275]                            |
| A_33_P3344233 | 0,020328356 | down | -1,8347521 | PRAC2       | Homo sapiens prostate cancer susceptibility candidate 2 (PRAC2), transcript variant 1, mRNA [NM_001282276]                            |
| A_33_P3249349 | 7,76E-04    | down | -4,76397   | PRAME       | preferentially expressed antigen in melanoma [Source:HGNC Symbol;Acc:HGNC:9336] [ENST00000406503]                                     |
| A_33_P3249345 | 0,012997548 | up   | 2,0449436  | PRAME       | Homo sapiens preferentially expressed antigen in melanoma (PRAME), transcript variant 9, mRNA [NM_001291719]                          |
| A_33_P3303594 | 0,042875115 | up   | 1,7719252  | PRAMEF11    | Homo sapiens PRAME family member 11 (PRAMEF11), mRNA [NM_001146344]                                                                   |
| A_33_P3418710 | 0,034267582 | up   | 2,3912597  | PRAMEF12    | Homo sapiens PRAME family member 12 (PRAMEF12), mRNA [NM_001080830]                                                                   |
| A_33_P3418987 | 0,006561586 | up   | 1,6342255  | PRAMEF14    | Homo sapiens PRAME family member 14 (PRAMEF14), mRNA [NM_001024661]                                                                   |
| A_23_P97465   | 0,007289542 | up   | 1,657194   | PRAMEF2     | Homo sapiens PRAME family member 2 (PRAMEF2), mRNA [NM_023014]                                                                        |
| A_33_P3309911 | 3,63E-04    | down | -1,9711676 | PRAMEF5     | Homo sapiens PRAME family member 5 (PRAMEF5), mRNA [NM_001013407]                                                                     |
| A_33_P3249449 | 0,046935804 | up   | 1,5784236  | PRAMEF5     | Homo sapiens PRAME family member 5 (PRAMEF5), mRNA [NM_001013407]                                                                     |
| A_33_P3332625 | 0,04309581  | down | -2,6421247 | PRB1        | Homo sapiens proline-rich protein BstNI subfamily 1 (PRB1), transcript variant 3, mRNA [NM_199354]                                    |
| A_33_P3258593 | 0,024259994 | down | -1,920203  | PRB1        | Homo sapiens proline-rich protein BstNI subfamily 1 (PRB1), transcript variant 1, mRNA [NM_005039]                                    |
| A_23_P116890  | 3,20E-04    | down | -2,2638621 | PRB3        | Homo sapiens proline-rich protein BstNI subfamily 3 (PRB3), mRNA [NM_006249]                                                          |
| A_33_P3342081 | 0,007330516 | up   | 2,7763085  | PRDM1       | Homo sapiens PR domain containing 1, with ZNF domain (PRDM1), transcript variant 1, mRNA [NM_001198]                                  |
| A_32_P228699  | 0,005859808 | up   | 1,5085723  | PRDM10      | Homo sapiens PR domain containing 10 (PRDM10), transcript variant 2, mRNA [NM_199437]                                                 |
| A_24_P9833    | 0,0407953   | down | -2,0071588 | PRDM11      | Homo sapiens PR domain containing 11 (PRDM11), transcript variant 2, mRNA [NM_001256696]                                              |
| A_33_P3214803 | 1,97E-05    | down | -3,2297122 | PRDM13      | Homo sapiens PR domain containing 13 (PRDM13), mRNA [NM_021620]                                                                       |
| A_23_P123488  | 0,004823328 | up   | 1,9725349  | PRDM14      | Homo sapiens PR domain containing 14 (PRDM14), mRNA [NM_024504]                                                                       |
| A_33_P3242548 | 0,032455094 | down | -2,02058   | PRDM5       | Homo sapiens PR domain containing 5 (PRDM5), transcript variant 3, mRNA [NM_001300824]                                                |
| A_32_P222684  | 0,01797048  | down | -1,8577124 | PRDM6       | Homo sapiens PR domain containing 6 (PRDM6), mRNA [NM_001136239]                                                                      |
| A_23_P255328  | 0,010939207 | down | -2,4855416 | PRDM8       | Homo sapiens PR domain containing 8 (PRDM8), transcript variant 1, mRNA [NM_020226]                                                   |
| A_33_P3234882 | 0,005994462 | up   | 1,5991429  | PRELP       | Homo sapiens proline/arginine-rich end leucine-rich repeat protein (PRELP), transcript variant 1, mRNA [NM_002725]                    |
| A_23_P413641  | 0,040179744 | up   | 2,151303   | PREX1       | Homo sapiens phosphatidylinositol-3,4,5-trisphosphate-dependent Rac exchange factor 1 (PREX1), mRNA [NM_020820]                       |
| A_33_P3394993 | 9,22E-08    | down | -11,281841 | PREX2       | Homo sapiens phosphatidylinositol-3,4,5-trisphosphate-dependent Rac exchange factor 2 (PREX2), transcript variant 2, mRNA [NM_025170] |
| A_23_P47466   | 0,004676359 | down | -2,159779  | PRG3        | Homo sapiens proteoglycan 3 (PRG3), mRNA [NM_006093]                                                                                  |
| A_23_P408285  | 0,014864335 | down | -1,7321731 | PRICKLE1    | Homo sapiens prickle homolog 1 (Drosophila) (PRICKLE1), transcript variant 1, mRNA [NM_153026]                                        |
| A_23_P25019   | 0,00174487  | down | -1,7418295 | PRIM1       | Homo sapiens primase, DNA, polypeptide 1 (49kDa) (PRIM1), mRNA [NM_000946]                                                            |
| A_33_P3261982 | 2,54E-04    | up   | 3,126055   | PRIM2       | Homo sapiens primase, DNA, polypeptide 2 (58kDa) (PRIM2), transcript variant 1, mRNA [NM_000947]                                      |
| A_33_P3312212 | 0,002872198 | down | -1,5373639 | PRKAA1      | Homo sapiens protein kinase, AMP-activated, alpha 1 catalytic subunit (PRKAA1), transcript variant 2, mRNA [NM_206907]                |
| A_32_P94160   | 0,013719295 | up   | 1,8844142  | PRKAA2      | Homo sapiens protein kinase, AMP-activated, alpha 2 catalytic subunit (PRKAA2), mRNA [NM_006252]                                      |
| A_23_P204503  | 0,004475147 | up   | 1,7182993  | PRKAB1      | Homo sapiens protein kinase, AMP-activated, beta 1 non-catalytic subunit (PRKAB1), mRNA [NM_006253]                                   |
| A_33_P3215317 | 4,38E-05    | down | -2,667875  | PRKACB      | Homo sapiens protein kinase, cAMP-dependent, catalytic, beta (PRKACB), transcript variant 12, mRNA [NM_001300917]                     |
| A_33_P3772996 | 0,00551668  | down | -1,7463421 | PRKACB      | Homo sapiens protein kinase, cAMP-dependent, catalytic, beta (PRKACB), transcript variant 7, mRNA [NM_001242860]                      |
| A_23_P71926   | 0,001087214 | down | -2,1778398 | PRKACG      | Homo sapiens protein kinase, cAMP-dependent, catalytic, gamma (PRKACG), mRNA [NM_002732]                                              |
| A_21_P0002740 | 0,006370881 | down | -1,7952816 | PRKAR2A-AS1 | Homo sapiens PRKAR2A antisense RNA 1 (PRKAR2A-AS1), transcript variant 1, long non-coding RNA [NR_109996]                             |
| A_23_P16189   | 0,001438308 | down | -1,9232069 | PRKCG       | Homo sapiens protein kinase C, gamma (PRKCG), mRNA [NM_002739]                                                                        |
| A_23_P205567  | 0,0270661   | up   | 1,6504697  | PRKCH       | Homo sapiens protein kinase C, eta (PRKCH), mRNA [NM_006255]                                                                          |
| A_21_P0006826 | 0,043739267 | up   | 2,0073116  | PRKCCQ-AS1  | PRKCCQ antisense RNA 1 [Source:HGNC Symbol;Acc:HGNC:44689] [ENST00000624974]                                                          |
| A_23_P106016  | 0,019406999 | down | -1,8192679 | PRKD1       | Homo sapiens protein kinase D1 (PRKD1), mRNA [NM_002742]                                                                              |
| A_33_P3351087 | 0,010106999 | up   | 1,5115802  | PRKG1       | protein kinase, cGMP-dependent, type I [Source:HGNC Symbol;Acc:HGNC:9414] [ENST00000373976]                                           |
| A_24_P320759  | 0,012412357 | up   | 1,5711564  | PRKRIP1     | Homo sapiens PRKR interacting protein 1 (IL11 inducible) (PRKRIP1), mRNA [NM_024653]                                                  |
| A_33_P3358893 | 2,16E-04    | down | -3,6980028 | PRM2        | Homo sapiens prothymine 2 (PRM2), transcript variant 5, mRNA [NM_001286359]                                                           |
| A_33_P3324137 | 0,017092342 | up   | 1,5691457  | PRO0628     | Homo sapiens, clone IMAGE:4399587, mRNA. [BC015320]                                                                                   |
| A_32_P206735  | 4,49E-04    | down | -2,5086744 | PRO1082     | Homo sapiens PRO1082 mRNA, complete cds. [AF116655]                                                                                   |
| A_33_P3538279 | 0,006534381 | up   | 1,9008074  | PRO2852     | PREDICTED: Homo sapiens uncharacterized protein PRO2852 (PRO2852), misc_RNA [XR_158845]                                               |
| A_33_P3368950 | 0,001732861 | down | -2,687346  | PROB1       | Homo sapiens proline-rich basic protein 1 (PROB1), mRNA [NM_001161546]                                                                |
| A_23_P165201  | 0,035483174 | down | -1,9079994 | PRODH2      | Homo sapiens proline dehydrogenase (oxidase) 2 (PRODH2), mRNA [NM_021232]                                                             |
| A_23_P412603  | 0,005127144 | down | -2,4754798 | PROKR2      | Homo sapiens prokineticin receptor 2 (PROKR2), mRNA [NM_144773]                                                                       |
| A_33_P3394465 | 7,65E-04    | down | -2,2899082 | PROP1       | Homo sapiens PROP paired-like homeobox 1 (PROP1), mRNA [NM_006261]                                                                    |
| A_21_P0012453 | 0,014893443 | down | -1,5107372 | PROS1       | Homo sapiens protein S (alpha) (PROS1), mRNA [NM_000313]                                                                              |
| A_33_P3312182 | 0,007218325 | up   | 1,6894222  | PROSER2     | Homo sapiens proline and serine rich 2 (PROSER2), mRNA [NM_153256]                                                                    |
| A_24_P389608  | 0,003314322 | up   | 1,9640638  | PROSER2     | Homo sapiens proline and serine rich 2 (PROSER2), mRNA [NM_153256]                                                                    |
| A_23_P97573   | 0,006458786 | up   | 1,5172998  | PRPF3       | Homo sapiens pre-mRNA processing factor 3 (PRPF3), mRNA [NM_004698]                                                                   |
| A_24_P97001   | 0,012018967 | up   | 1,5912381  | PRPF38A     | Homo sapiens pre-mRNA processing factor 38A (PRPF38A), mRNA [NM_032864]                                                               |

|               |                  |            |                    |                                                                                                                          |
|---------------|------------------|------------|--------------------|--------------------------------------------------------------------------------------------------------------------------|
| A_23_P163113  | 1,64E-04 up      | 1,777695   | PRPF39             | Homo sapiens pre-mRNA processing factor 39 (PRPF39), mRNA [NM_017922]                                                    |
| A_24_P941787  | 0,002848825 up   | 1,6263878  | PRPF4B             | Homo sapiens pre-mRNA processing factor 4B (PRPF4B), mRNA [NM_003913]                                                    |
| A_24_P349466  | 4,11E-04 down    | -1,8044634 | PRR13              | Homo sapiens proline rich 13 (PRR13), transcript variant 3, mRNA [NM_001005354]                                          |
| A_23_P118894  | 0,030321714 up   | 2,3577964  | PRR15L             | Homo sapiens proline rich 15-like (PRR15L), mRNA [NM_024320]                                                             |
| A_32_P407293  | 0,00794215 up    | 3,1794348  | PRR18              | Homo sapiens proline rich 18 (PRR18), mRNA [NM_175922]                                                                   |
| A_24_P178300  | 3,94E-04 down    | -5,955972  | PRR21              | Homo sapiens proline rich 21 (PRR21), mRNA [NM_001080835]                                                                |
| A_33_P3222769 | 9,60E-04 down    | -2,4473593 | PRR25              | Homo sapiens proline rich 25 (PRR25), mRNA [NM_001013638]                                                                |
| A_33_P3391039 | 0,00563498 down  | -2,4642854 | PRR27              | Homo sapiens proline rich 27 (PRR27), mRNA [NM_214711]                                                                   |
| A_33_P3312642 | 0,019251851 down | -1,9339738 | PRR32              | Homo sapiens proline rich 32 (PRR32), mRNA [NM_001122716]                                                                |
| A_24_P247273  | 0,02191441 down  | -1,5502107 | PRR33              | proline rich 33 [Source:HGNC Symbol;Acc:HGNC:35118] [ENST00000391480]                                                    |
| A_24_P147540  | 0,00196429 down  | -3,4805665 | PRR36              | Homo sapiens proline rich 36 (PRR36), transcript variant 1, mRNA [NM_001190467]                                          |
| A_33_P3265855 | 0,031220503 up   | 1,614503   | PRR5-ARHGAP8       | Homo sapiens PRR5-ARHGAP8 readthrough (PRR5-ARHGAP8), mRNA [NM_181334]                                                   |
| A_23_P412409  | 1,85E-04 up      | 1,8376045  | PRRC2C             | Homo sapiens proline-rich coiled-coil 2C (PRRC2C), mRNA [NM_015172]                                                      |
| A_23_P387537  | 0,004335125 down | -2,3049247 | PRRG3              | Homo sapiens proline rich Gla (G-carboxyglutamic acid) 3 (transmembrane) (PRRG3), transcript variant 1, mRNA [NM_024082] |
| A_23_P192474  | 0,02048609 down  | -1,9156978 | PRRT1              | Homo sapiens proline-rich transmembrane protein 1 (PRRT1), mRNA [NM_030651]                                              |
| A_24_P937405  | 0,009434659 down | -1,6746392 | PRSS23             | Homo sapiens protease, serine, 23 (PRSS23), transcript variant 1, mRNA [NM_007173]                                       |
| A_23_P350719  | 4,25E-04 up      | 3,0924425  | PRSS30P            | Homo sapiens protease, serine, 30, pseudogene (PRSS30P), non-coding RNA [NR_026864]                                      |
| A_24_P412734  | 0,009196385 down | -4,3668303 | PRSS36             | Homo sapiens protease, serine, 36 (PRSS36), transcript variant 1, mRNA [NM_173502]                                       |
| A_33_P3223898 | 0,010880706 up   | 3,306784   | PRSS45             | Homo sapiens protease, serine, 45 (PRSS45), mRNA [NM_199183]                                                             |
| A_33_P3340565 | 0,001512089 up   | 2,098737   | PRSS53             | Homo sapiens protease, serine, 53 (PRSS53), mRNA [NM_001039503]                                                          |
| A_33_P3345309 | 0,038809247 down | -2,256835  | PRSS56             | Homo sapiens protease, serine, 56 (PRSS56), mRNA [NM_001195129]                                                          |
| A_33_P3380523 | 0,006615094 down | -1,6366733 | PRTFDC1            | phosphoribosyl transferase domain containing 1 [Source:HGNC Symbol;Acc:HGNC:23333] [ENST00000376376]                     |
| A_24_P390909  | 0,006163849 up   | 2,0693228  | PRX                | Homo sapiens periaxin (PRX), transcript variant 2, mRNA [NM_181882]                                                      |
| A_23_P11408   | 2,32E-04 down    | -2,6316955 | PRY2               | Homo sapiens PTPN13-like, Y-linked 2 (PRY2), mRNA [NM_001002758]                                                         |
| A_33_P3419108 | 0,008327827 down | -1,7281331 | PRY2               | Homo sapiens PTPN13-like, Y-linked 2 (PRY2), mRNA [NM_001002758]                                                         |
| A_23_P12680   | 0,023089165 up   | 1,5306673  | PSAP               | Homo sapiens prosaposin (PSAP), transcript variant 2, mRNA [NM_001042465]                                                |
| A_33_P3233125 | 0,001158465 down | -1,7514906 | PSD                | Homo sapiens pleckstrin and Sec7 domain containing (PSD), transcript variant 1, mRNA [NM_002779]                         |
| A_33_P3312504 | 1,60E-05 down    | -2,4016175 | PSD4               | Homo sapiens pleckstrin and Sec7 domain containing 4 (PSD4), mRNA [NM_012455]                                            |
| A_24_P22800   | 0,001246744 down | -2,9244032 | PSG11              | Homo sapiens pregnancy specific beta-1-glycoprotein 11 (PSG11), transcript variant 1, mRNA [NM_002785]                   |
| A_23_P39304   | 0,002316486 up   | 1,7989802  | PSG9               | Homo sapiens pregnancy specific beta-1-glycoprotein 9 (PSG9), transcript variant 1, mRNA [NM_002784]                     |
| A_33_P3226610 | 0,026294341 down | -1,7350887 | PSIP1              | Homo sapiens PC4 and SFRS1 interacting protein 1 (PSIP1), transcript variant 1, mRNA [NM_021144]                         |
| A_23_P383601  | 7,86E-04 up      | 1,6240243  | PSMA3-AS1          | Homo sapiens PSMA3 antisense RNA 1 (PSMA3-AS1), transcript variant 1, long non-coding RNA [NR_029434]                    |
| A_23_P111000  | 0,017467428 down | -1,7186496 | PSMB9              | Homo sapiens proteasome (prosome, macropain) subunit, beta type, 9 (PSMB9), mRNA [NM_002800]                             |
| A_33_P3303687 | 0,015110462 down | -1,5128661 | PSMC1              | Homo sapiens proteasome (prosome, macropain) 26S subunit, ATPase, 1 (PSMC1), mRNA [NM_002802]                            |
| A_24_P287941  | 0,005470315 up   | 1,5621456  | PSMC3IP            | Homo sapiens PSMC3 interacting protein (PSMC3IP), transcript variant 1, mRNA [NM_013290]                                 |
| A_33_P3335624 | 0,003581008 down | -1,6806275 | PSMD10             | proteasome (prosome, macropain) 26S subunit, non-ATPase, 10 [Source:HGNC Symbol;Acc:HGNC:9555] [ENST00000338548]         |
| A_33_P3305254 | 6,22E-04 down    | -1,6410416 | PSMD5              | Homo sapiens proteasome (prosome, macropain) 26S subunit, non-ATPase, 5 (PSMD5), transcript variant 1, mRNA [NM_005047]  |
| A_33_P3305243 | 0,020218946 up   | 1,6627157  | PSMD5              | proteasome (prosome, macropain) 26S subunit, non-ATPase, 5 [Source:HGNC Symbol;Acc:HGNC:9563] [ENST00000373903]          |
| A_23_P79628   | 0,015541367 up   | 1,5461434  | PSME4              | Homo sapiens proteasome (prosome, macropain) activator subunit 4 (PSME4), mRNA [NM_014614]                               |
| A_33_P3357653 | 7,40E-04 down    | -2,091413  | PSMG2              | proteasome (prosome, macropain) assembly chaperone 2 [Source:HGNC Symbol;Acc:HGNC:24929] [ENST00000585853]               |
| A_33_P3565787 | 0,00816161 down  | -2,1922495 | PSMG3-AS1          | Homo sapiens PSMG3 antisense RNA 1 (head to head) (PSMG3-AS1), transcript variant 1, long non-coding RNA [NR_027329]     |
| A_33_P3393537 | 0,019650662 down | -1,6607398 | PTAFR              | Homo sapiens platelet-activating factor receptor (PTAFR), transcript variant 2, mRNA [NM_001164722]                      |
| A_33_P3209915 | 0,019001298 up   | 1,6676233  | PTAR1              | Homo sapiens protein prenyltransferase alpha subunit repeat containing 1 (PTAR1), mRNA [NM_001099666]                    |
| A_24_P106910  | 0,03010083 up    | 1,6104153  | PTCH1              | Homo sapiens patched 1 (PTCH1), transcript variant 1a, mRNA [NM_001083602]                                               |
| A_23_P355311  | 1,04E-04 down    | -4,881239  | PTCH2              | Homo sapiens patched 2 (PTCH2), transcript variant 1, mRNA [NM_003738]                                                   |
| A_33_P3348156 | 5,75E-08 down    | -6,1244626 | PTCH2              | patched 2 [Source:HGNC Symbol;Acc:HGNC:9586] [ENST00000438067]                                                           |
| A_32_P232411  | 0,044920914 up   | 1,5179249  | PTCHD2             | Homo sapiens patched domain containing 2 (PTCHD2), mRNA [NM_020780]                                                      |
| A_33_P3219811 | 4,02E-04 down    | -1,8142681 | PTGDS              | prostaglandin D2 synthase 21kDa (brain) [Source:HGNC Symbol;Acc:HGNC:9592] [ENST00000371623]                             |
| A_23_P148047  | 0,010142119 up   | 1,6963592  | PTGER4             | Homo sapiens prostaglandin E receptor 4 (subtype EP4) (PTGER4), mRNA [NM_000958]                                         |
| A_24_P135875  | 0,04670934 down  | -1,7586254 | PTGER4P2-CDK2AP2P2 | Homo sapiens PTGER4P2-CDK2AP2P2 readthrough transcribed pseudogene (PTGER4P2-CDK2AP2P2), non-coding RNA [NR_024496]      |
| A_33_P3325257 | 7,85E-07 down    | -2,799685  | PTGER4P2-CDK2AP2P2 | Homo sapiens PTGER4P2-CDK2AP2P2 readthrough transcribed pseudogene (PTGER4P2-CDK2AP2P2), non-coding RNA [NR_024496]      |
| A_24_P403417  | 0,001391525 up   | 2,639865   | PTGES              | Homo sapiens prostaglandin E synthase (PTGES), mRNA [NM_004878]                                                          |
| A_33_P3358183 | 0,001996976 down | -2,0597095 | PTGFR              | Homo sapiens prostaglandin F receptor (FP) (PTGFR), transcript variant 1, mRNA [NM_000959]                               |
| A_33_P3376551 | 0,003325508 up   | 1,5064692  | PTGFR              | Homo sapiens prostaglandin F receptor (FP) (PTGFR), transcript variant 2, mRNA [NM_001039585]                            |
| A_23_P357374  | 0,023432512 down | -1,6341544 | PTH2               | Homo sapiens parathyroid hormone 2 (PTH2), mRNA [NM_178449]                                                              |
| A_23_P22096   | 1,95E-04 up      | 2,083669   | PTK2               | Homo sapiens protein tyrosine kinase 2 (PTK2), transcript variant 1, mRNA [NM_153831]                                    |
| A_33_P3273000 | 0,019328482 down | -1,63205   | PTK2B              | Homo sapiens cDNA FLJ46514 fis, clone THYMU3032798, highly similar to Focal adhesion kinase 2 (EC 2.7.1.112). [AK128371] |
| A_33_P3351536 | 0,002852898 up   | 2,567587   | PTK2B              | Homo sapiens protein tyrosine kinase 2 beta (PTK2B), transcript variant 1, mRNA [NM_173174]                              |
| A_33_P3333038 | 9,07E-04 down    | -2,529366  | PTMS               | Homo sapiens parathyrosin (PTMS), mRNA [NM_002824]                                                                       |
| A_23_P23114   | 7,41E-06 up      | 2,190312   | PTP4A2             | Homo sapiens protein tyrosine phosphatase type IVA, member 2 (PTP4A2), transcript variant 1, mRNA [NM_080391]            |
| A_21_P0012454 | 0,01580442 down  | -1,7574232 | PTPN11             | Homo sapiens protein tyrosine phosphatase, non-receptor type 11 (PTPN11), transcript variant 2, mRNA [NM_080601]         |



|                |                  |                     |                                                                                                                                                            |
|----------------|------------------|---------------------|------------------------------------------------------------------------------------------------------------------------------------------------------------|
| A_23_P8763     | 0,025346942 up   | 1,6491331 PTPN12    | Homo sapiens protein tyrosine phosphatase, non-receptor type 12 (PTPN12), transcript variant 1, mRNA [NM_002835]                                           |
| A_23_P18493    | 0,009678642 up   | 1,5633535 PTPN13    | Homo sapiens protein tyrosine phosphatase, non-receptor type 13 (APO-1/CD95 (Fas)-associated phosphatase) (PTPN13), transcript variant 4, mRNA [NM_080685] |
| A_24_P2648     | 0,001180038 down | -1,7926356 PTPN14   | Homo sapiens protein tyrosine phosphatase, non-receptor type 14 (PTPN14), mRNA [NM_005401]                                                                 |
| A_33_P3489222  | 0,014999097 down | -2,3128688 PTPN20B  | Homo sapiens protein tyrosine phosphatase, non-receptor type 20B (PTPN20B), transcript variant 1, mRNA [NM_001042357]                                      |
| A_23_P403898   | 4,27E-04 up      | 1,9669343 PTPN3     | Homo sapiens protein tyrosine phosphatase, non-receptor type 3 (PTPN3), transcript variant 1, mRNA [NM_002829]                                             |
| A_24_P409519   | 0,016523872 down | -2,3263204 PTPN5    | Homo sapiens protein tyrosine phosphatase, non-receptor type 5 (striatum-enriched) (PTPN5), transcript variant 1, mRNA [NM_006906]                         |
| A_21_P0005998  | 0,002613107 up   | 1,9997398 PTPRD-AS2 | Homo sapiens PTPRD antisense RNA 2 (head to head) (PTPRD-AS2), long non-coding RNA [NR_110696]                                                             |
| A_33_P3276282  | 0,029978862 up   | 2,0947654 PTPRF     | protein tyrosine phosphatase, receptor type, F [Source:HGNC Symbol;Acc:HGNC:9670] [ENST00000617451]                                                        |
| A_21_P0000749  | 0,032937635 up   | 2,590119 PTPRG-AS1  | Homo sapiens PTPRG antisense RNA 1 (PTPRG-AS1), transcript variant 1, long non-coding RNA [NR_038281]                                                      |
| A_24_P921321   | 1,97E-04 up      | 2,562148 PTPRJ      | Homo sapiens protein tyrosine phosphatase, receptor type, J (PTPRJ), transcript variant 1, mRNA [NM_002843]                                                |
| A_23_P159255   | 0,022873826 up   | 1,5025264 PTPRM     | Homo sapiens protein tyrosine phosphatase, receptor type, M (PTPRM), transcript variant 2, mRNA [NM_002845]                                                |
| A_32_P79434    | 0,029004099 up   | 2,5447445 PTPRN2    | Homo sapiens protein tyrosine phosphatase, receptor type, N polypeptide 2 (PTPRN2), transcript variant 1, mRNA [NM_002847]                                 |
| A_23_P60016    | 0,005232151 down | -1,8027292 PTTG3P   | Homo sapiens pituitary tumor-transforming 3, pseudogene (PTTG3P), non-coding RNA [NR_002734]                                                               |
| A_23_P170820   | 5,69E-04 up      | 1,5989779 PUM1      | Homo sapiens pumilio RNA-binding family member 1 (PUM1), transcript variant 1, mRNA [NM_001020658]                                                         |
| A_23_P10815    | 9,17E-04 up      | 1,5602882 PUM1      | Homo sapiens pumilio RNA-binding family member 1 (PUM1), transcript variant 1, mRNA [NM_001020658]                                                         |
| A_24_P42446    | 0,00506156 up    | 1,747903 PURG       | purine-rich element binding protein G [Source:HGNC Symbol;Acc:HGNC:17930] [ENST00000339382]                                                                |
| A_23_P82478    | 0,004418466 up   | 1,5047832 PUS7      | Homo sapiens pseudouridylylate synthase 7 (putative) (PUS7), mRNA [NM_019042]                                                                              |
| A_23_P208293   | 0,009430461 up   | 1,5246649 PVRL2     | Homo sapiens poliovirus receptor-related 2 (herpesvirus entry mediator B) (PVRL2), transcript variant delta, mRNA [NM_001042724]                           |
| A_19_P00321075 | 0,00463438 up    | 1,5071967 PVT1      | Homo sapiens Pvt1 oncogene (non-protein coding) (PVT1), long non-coding RNA [NR_003367]                                                                    |
| A_33_P3357748  | 0,001441822 up   | 1,6041416 PVT1      | Homo sapiens Pvt1 oncogene (non-protein coding) (PVT1), long non-coding RNA [NR_003367]                                                                    |
| A_21_P0008707  | 0,003441147 down | -2,9433699 PWRN2    | Homo sapiens Prader-Willi region non-protein coding RNA 2 (PWRN2), long non-coding RNA [NR_026647]                                                         |
| A_24_P272290   | 0,001726498 up   | 1,7014121 PXDC1     | Homo sapiens PX domain containing 1 (PXDC1), mRNA [NM_183373]                                                                                              |
| A_33_P3271455  | 0,01759384 up    | 1,9033346 PXDN      | Homo sapiens peroxidasin (PXDN), mRNA [NM_012293]                                                                                                          |
| A_33_P3238166  | 0,049109433 up   | 1,6641766 PXDN      | Homo sapiens peroxidasin (PXDN), mRNA [NM_012293]                                                                                                          |
| A_21_P0000840  | 0,026664685 down | -2,0253441 PXN-AS1  | Homo sapiens PXN antisense RNA 1 (PXN-AS1), long non-coding RNA [NR_038924]                                                                                |
| A_23_P333022   | 0,017214615 up   | 1,7253644 PXT1      | Homo sapiens peroxisomal, testis specific 1 (PXT1), mRNA [NM_152990]                                                                                       |
| A_23_P383278   | 0,00553417 down  | -1,5566671 PYCRL    | Homo sapiens pyrroline-5-carboxylate reductase-like (PYCRL), mRNA [NM_023078]                                                                              |
| A_33_P3417313  | 0,02120772 down  | -1,9135177 PYCRL    | Homo sapiens pyrroline-5-carboxylate reductase-like (PYCRL), mRNA [NM_023078]                                                                              |
| A_23_P405815   | 0,003467581 up   | 2,612355 PYGM       | Homo sapiens phosphorylase, glycogen, muscle (PYGM), transcript variant 1, mRNA [NM_005609]                                                                |
| A_33_P3289352  | 9,84E-04 down    | -1,773691 PYGO2     | Homo sapiens pygopus family PHD finger 2 (PYGO2), mRNA [NM_138300]                                                                                         |
| A_24_P139604   | 0,011016646 up   | 2,5214603 PYHIN1    | Homo sapiens pyrin and HIN domain family, member 1 (PYHIN1), transcript variant 4, mRNA [NM_198930]                                                        |
| A_24_P233078   | 5,93E-04 down    | -2,4294772 PYY2     | Homo sapiens peptide YY, 2 (pseudogene) (PYY2), non-coding RNA [NR_003064]                                                                                 |
| A_24_P71468    | 0,044907473 up   | 1,5333086 QPCT      | Homo sapiens glutaminyl-peptide cyclotransferase (QPCT), mRNA [NM_012413]                                                                                  |
| A_23_P92467    | 0,007399319 up   | 1,5414495 QRFPR     | Homo sapiens pyroglutamylated RFamide peptide receptor (QRFPR), mRNA [NM_198179]                                                                           |
| A_23_P395632   | 2,88E-05 down    | -4,635553 R3HDML    | Homo sapiens R3H domain containing-like (R3HDML), mRNA [NM_178491]                                                                                         |
| A_33_P3391240  | 0,001118115 up   | 2,1059177 RAB19     | Homo sapiens RAB19, member RAS oncogene family (RAB19), mRNA [NM_001008749]                                                                                |
| A_33_P3295803  | 0,006737907 down | -1,6081345 RAB2B    | Homo sapiens RAB2B, member RAS oncogene family (RAB2B), transcript variant 1, mRNA [NM_032846]                                                             |
| A_24_P167338   | 0,016310861 down | -2,0486846 RAB30    | Homo sapiens RAB30, member RAS oncogene family (RAB30), transcript variant 2, mRNA [NM_014488]                                                             |
| A_23_P103011   | 0,001248569 down | -2,1927872 RAB36    | Homo sapiens RAB36, member RAS oncogene family (RAB36), mRNA [NM_004914]                                                                                   |
| A_33_P3314594  | 3,13E-06 down    | -2,4505167 RAB37    | Homo sapiens RAB37, member RAS oncogene family (RAB37), transcript variant 3, mRNA [NM_175738]                                                             |
| A_33_P3665739  | 6,21E-04 down    | -2,974374 RAB43     | AGENCOURT_6606420 NIH_MGC_106 Homo sapiens cDNA clone IMAGE:5483928 5', mRNA sequence [BM917410]                                                           |
| A_21_P0005115  | 4,02E-04 down    | -3,1531613 RAB44    | Homo sapiens RAB44, member RAS oncogene family (RAB44), mRNA [NM_001257357]                                                                                |
| A_23_P410998   | 0,001891117 up   | 1,7293711 RAB5B     | Homo sapiens RAB5B, member RAS oncogene family (RAB5B), transcript variant 1, mRNA [NM_002868]                                                             |
| A_33_P3223378  | 0,001194862 up   | 1,9908838 RAB6C-AS1 | RAB6C antisense RNA 1 [Source:HGNC Symbol;Acc:HGNC:49278] [ENST00000624615]                                                                                |
| A_24_P126139   | 0,032981273 up   | 1,6867243 RAB9B     | Homo sapiens RAB9B, member RAS oncogene family (RAB9B), mRNA [NM_016370]                                                                                   |
| A_33_P3278220  | 0,001509255 down | -5,0602045 RABEPK   | Rab9 effector protein with kelch motifs [Source:HGNC Symbol;Acc:HGNC:16896] [ENST00000373544]                                                              |
| A_33_P3411991  | 0,003470286 down | -1,5427945 RABGAP1  | Homo sapiens RAB GTPase activating protein 1 (RABGAP1), mRNA [NM_012197]                                                                                   |
| A_24_P336705   | 0,011896983 up   | 1,5313325 RABGGTB   | Homo sapiens Rab geranylgeranyltransferase, beta subunit (RABGGTB), transcript variant 1, mRNA [NM_004582]                                                 |
| A_33_P3344009  | 0,001727948 down | -1,5704852 RABL2A   | Homo sapiens RAB, member of RAS oncogene family-like 2A (RABL2A), transcript variant 2, mRNA [NM_007082]                                                   |
| A_33_P3333045  | 0,001593479 down | -1,8495921 RABL2A   | RAB, member of RAS oncogene family-like 2A [Source:HGNC Symbol;Acc:HGNC:9799] [ENST00000467600]                                                            |
| A_33_P3220160  | 0,0441222 down   | -1,6896552 RAC2     | Homo sapiens cDNA FLJ39605 fis, clone SKNSH2005981, weakly similar to RAS-RELATED C3 BOTULINUM TOXIN SUBSTRATE 2. [AK096924]                               |
| A_24_P97836    | 3,43E-04 up      | 2,1621776 RAD17     | Homo sapiens RAD17 homolog (S. pombe) (RAD17), transcript variant 8, mRNA [NM_002873]                                                                      |
| A_21_P0011373  | 0,046105567 up   | 1,5366485 RAD51-AS1 | Homo sapiens RAD51 antisense RNA 1 (head to head) (RAD51-AS1), long non-coding RNA [NR_040058]                                                             |
| A_23_P207014   | 0,034443352 down | -1,5384098 RAD51C   | Homo sapiens RAD51C homolog C (RAD51C), transcript variant 2, mRNA [NM_002876]                                                                             |
| A_23_P94141    | 0,023680137 down | -1,5278962 RAD54B   | Homo sapiens RAD54 homolog B (S. cerevisiae) (RAD54B), transcript variant 2, mRNA [NM_001205262]                                                           |
| A_33_P3361227  | 0,005746037 up   | 1,9154615 RAD9B     | RAD9 homolog B (S. pombe) [Source:HGNC Symbol;Acc:HGNC:21700] [ENST00000409461]                                                                            |
| A_21_P0013163  | 0,002678124 down | -1,6831219 RAET1K   | Homo sapiens retinoic acid early transcript 1K pseudogene (RAET1K), non-coding RNA [NR_024045]                                                             |
| A_23_P64525    | 0,047397956 up   | 1,6659983 RAG2      | Homo sapiens recombination activating gene 2 (RAG2), transcript variant 1, mRNA [NM_000536]                                                                |
| A_23_P417148   | 7,33E-05 up      | 1,7668754 RAI1      | Homo sapiens retinoic acid induced 1 (RAI1), mRNA [NM_030665]                                                                                              |
| A_23_P254165   | 1,71E-04 down    | -2,8871856 RAI2     | Homo sapiens retinoic acid induced 2 (RAI2), transcript variant 2, mRNA [NM_021785]                                                                        |
| A_23_P151565   | 0,002268979 up   | 1,5007187 RALGAP1   | Homo sapiens Ral GTPase activating protein, alpha subunit 1 (catalytic) (RALGAP1), transcript variant 1, mRNA [NM_014990]                                  |

|               |                  |                        |                                                                                                                                                  |
|---------------|------------------|------------------------|--------------------------------------------------------------------------------------------------------------------------------------------------|
| A_33_P3291998 | 0,017874971 up   | 1,6660522 RALGPS2      | Ral GEF with PH domain and SH3 binding motif 2 [Source:HGNC Symbol;Acc:HGNC:30279] [ENST00000495034]                                             |
| A_21_P0014397 | 1,21E-05 down    | -2,3207762 RALY-AS1    | Homo sapiens RALY antisense RNA 1 (RALY-AS1), transcript variant 1, long non-coding RNA [NR_109885]                                              |
| A_23_P50946   | 0,044186957 down | -1,5200957 RAMP1       | Homo sapiens receptor (G protein-coupled) activity modifying protein 1 (RAMP1), mRNA [NM_005855]                                                 |
| A_23_P111737  | 0,022973446 down | -1,9051359 RAMP3       | Homo sapiens receptor (G protein-coupled) activity modifying protein 3 (RAMP3), mRNA [NM_005856]                                                 |
| A_24_P81965   | 0,005475187 up   | 1,7093656 RAP2A        | Homo sapiens RAP2A, member of RAS oncogene family (RAP2A), mRNA [NM_021033]                                                                      |
| A_33_P3414207 | 0,034336425 down | -2,013535 RAP2C-AS1    | Homo sapiens RAP2C antisense RNA 1 (RAP2C-AS1), long non-coding RNA [NR_110410]                                                                  |
| A_23_P304237  | 0,01405064 up    | 1,528514 RAPGEF1       | Homo sapiens Rap guanine nucleotide exchange factor (GEF) 1 (RAPGEF1), transcript variant 2, mRNA [NM_198679]                                    |
| A_23_P133095  | 0,025099913 up   | 1,7896525 RAPGEF2      | Homo sapiens Rap guanine nucleotide exchange factor (GEF) 2 (RAPGEF2), mRNA [NM_014247]                                                          |
| A_23_P151307  | 0,033655073 up   | 2,3663552 RAPGEF3      | Homo sapiens Rap guanine nucleotide exchange factor (GEF) 3 (RAPGEF3), transcript variant 2, mRNA [NM_006105]                                    |
| A_23_P215505  | 1,16E-04 up      | 2,5510957 RAPGEF5      | Homo sapiens Rap guanine nucleotide exchange factor (GEF) 5 (RAPGEF5), mRNA [NM_012294]                                                          |
| A_23_P144999  | 5,14E-05 up      | 2,2620676 RAPGEF6      | Homo sapiens Rap guanine nucleotide exchange factor (GEF) 6 (RAPGEF6), transcript variant 2, mRNA [NM_016340]                                    |
| A_24_P924862  | 0,04157477 up    | 1,5708361 RAPH1        | Homo sapiens Ras association (RalGDS/AF-6) and pleckstrin homology domains 1 (RAPH1), transcript variant 1, mRNA [NM_213589]                     |
| A_23_P134237  | 0,018045304 up   | 2,32104 RARRES2        | Homo sapiens retinoic acid receptor responder (azarotene induced) 2 (RARRES2), mRNA [NM_002889]                                                  |
| A_33_P3287972 | 0,043227836 up   | 1,5534444 RASA2        | RAS p21 protein activator 2 [Source:HGNC Symbol;Acc:HGNC:9872] [ENST00000452898]                                                                 |
| A_23_P502747  | 0,00864787 up    | 1,5678241 RASAL2       | Homo sapiens RAS protein activator like 2 (RASAL2), transcript variant 2, mRNA [NM_170692]                                                       |
| A_33_P3364646 | 0,015305883 up   | 2,6078625 RASGEF1B     | Homo sapiens RasGEF domain family, member 1B (RASGEF1B), transcript variant 1, mRNA [NM_152545]                                                  |
| A_24_P383762  | 0,02570745 down  | -2,046402 RASGEF1C     | Homo sapiens RasGEF domain family, member 1C (RASGEF1C), mRNA [NM_175062]                                                                        |
| A_21_P0004417 | 0,006168042 up   | 1,7392806 RASGRF2-AS1  | Homo sapiens RASGRF2 antisense RNA 1 (RASGRF2-AS1), long non-coding RNA [NR_105015]                                                              |
| A_23_P124642  | 0,04494301 down  | -2,272042 RASGRP1      | Homo sapiens RAS guanyl releasing protein 1 (calcium and DAG-regulated) (RASGRP1), transcript variant 1, mRNA [NM_005739]                        |
| A_33_P3209950 | 5,66E-06 down    | -4,3421087 RASGRP2     | RAS guanyl releasing protein 2 (calcium and DAG-regulated) [Source:HGNC Symbol;Acc:HGNC:9879] [ENST00000377494]                                  |
| A_33_P3365582 | 0,01566235 up    | 1,7554519 RASGRP3      | Homo sapiens RAS guanyl releasing protein 3 (calcium and DAG-regulated) (RASGRP3), transcript variant 1, mRNA [NM_001139488]                     |
| A_23_P165007  | 0,00291106 down  | -2,3761446 RASGRP4     | Homo sapiens RAS guanyl releasing protein 4 (RASGRP4), transcript variant a, mRNA [NM_170604]                                                    |
| A_23_P14124   | 0,007778268 down | -1,8718473 RASL11A     | Homo sapiens RAS-like, family 11, member A (RASL11A), mRNA [NM_206827]                                                                           |
| A_24_P150580  | 0,013452164 up   | 1,6629448 RASL12       | Homo sapiens RAS-like, family 12 (RASL12), mRNA [NM_016563]                                                                                      |
| A_24_P288448  | 3,82E-05 down    | -4,077424 RASSF2       | Ras association (RalGDS/AF-6) domain family member 2 [Source:HGNC Symbol;Acc:HGNC:9883] [ENST00000478553]                                        |
| A_33_P3293381 | 3,24E-04 down    | -4,074582 RASSF4       | Ras association (RalGDS/AF-6) domain family member 4 [Source:HGNC Symbol;Acc:HGNC:20793] [ENST00000428466]                                       |
| A_24_P199251  | 2,14E-04 down    | -1,7630353 RASSF9      | Homo sapiens Ras association (RalGDS/AF-6) domain family (N-terminal) member 9 (RASSF9), mRNA [NM_005447]                                        |
| A_33_P3353622 | 0,030908665 down | -1,5076305 RBAK        | Homo sapiens RB-associated KRAB zinc finger (RBAK), transcript variant 1, mRNA [NM_021163]                                                       |
| A_24_P72394   | 0,026535721 up   | 1,6691414 RBAK         | Homo sapiens RB-associated KRAB zinc finger (RBAK), transcript variant 1, mRNA [NM_021163]                                                       |
| A_33_P3232038 | 8,69E-04 down    | -2,0132763 RBAK-RBAKDN | Homo sapiens RBAK-RBAKDN readthrough (RBAK-RBAKDN), mRNA [NM_001204513]                                                                          |
| A_33_P3365047 | 1,16E-05 down    | -2,7483594 RBBP9       | Homo sapiens retinoblastoma binding protein 9 (RBBP9), mRNA [NM_006606]                                                                          |
| A_23_P166051  | 0,021750031 down | -1,6322806 RBCK1       | Homo sapiens RanBP-type and C3HC4-type zinc finger containing 1 (RBCK1), transcript variant 2, mRNA [NM_031229]                                  |
| A_33_P3238315 | 0,009534211 down | -2,3890512 RBCK1       | Homo sapiens RanBP-type and C3HC4-type zinc finger containing 1 (RBCK1), transcript variant 1, mRNA [NM_006462]                                  |
| A_24_P147242  | 0,008757206 down | -2,6887069 RBFOX1      | Homo sapiens RNA binding protein, fox-1 homolog (C. elegans) 1 (RBFOX1), mRNA [NM_145893]                                                        |
| A_21_P0013952 | 0,006171758 down | -1,7266669 RBFOX3      | Homo sapiens RNA binding protein, fox-1 homolog (C. elegans) 3 (RBFOX3), mRNA [NM_001082575]                                                     |
| A_24_P416159  | 4,85E-04 up      | 1,7074968 RBL2         | Homo sapiens retinoblastoma-like 2 (RBL2), mRNA [NM_005611]                                                                                      |
| A_33_P3499102 | 0,043178346 down | -1,6219267 RBM10       | Homo sapiens cDNA FLJ40796 fis, clone TRACH2007754, highly similar to DXS8237E PROTEIN. [AK098115]                                               |
| A_33_P3378935 | 0,030617002 down | -2,2623653 RBM14       | Homo sapiens mRNA for RNA binding motif protein 14 variant protein. [AB209007]                                                                   |
| A_23_P161644  | 0,026974136 up   | 1,6930001 RBM14        | Homo sapiens RNA binding motif protein 14 (RBM14), transcript variant 1, mRNA [NM_006328]                                                        |
| A_21_P0000020 | 0,007464056 up   | 1,5662596 RBM19        | Homo sapiens RNA binding motif protein 19 (RBM19), transcript variant 1, mRNA [NM_001146699]                                                     |
| A_33_P3307163 | 0,013960026 down | -1,7930838 RBM20       | Homo sapiens RNA binding motif protein 20 (RBM20), mRNA [NM_001134363]                                                                           |
| A_21_P0000141 | 0,00108032 up    | 1,7289416 RBM4         | Homo sapiens RNA binding motif protein 4 (RBM4), transcript variant 3, mRNA [NM_001198844]                                                       |
| A_33_P3301346 | 2,52E-05 down    | -3,2401056 RBM44       | RNA binding motif protein 44 [Source:HGNC Symbol;Acc:HGNC:24756] [ENST00000491996]                                                               |
| A_33_P3301351 | 0,010293387 up   | 1,7917999 RBM44        | Homo sapiens RNA binding motif protein 44 (RBM44), mRNA [NM_001080504]                                                                           |
| A_23_P132910  | 0,015629603 up   | 1,7826651 RBM47        | Homo sapiens RNA binding motif protein 47 (RBM47), transcript variant 2, mRNA [NM_019027]                                                        |
| A_33_P3256532 | 4,40E-06 down    | -2,7307422 RBM48       | Homo sapiens RNA binding motif protein 48 (RBM48), mRNA [NM_032120]                                                                              |
| A_23_P18276   | 0,002310641 up   | 1,5069178 RBM5         | Homo sapiens RNA binding motif protein 5 (RBM5), transcript variant 1, mRNA [NM_005778]                                                          |
| A_33_P3316323 | 0,01302472 up    | 1,5602902 RBMS1        | Homo sapiens RNA binding motif, single stranded interacting protein 1 (RBMS1), transcript variant 1, mRNA [NM_016836]                            |
| A_32_P56392   | 0,012582959 down | -1,6539619 RBMX        | Homo sapiens RNA binding motif protein, X-linked (RBMX), transcript variant 1, mRNA [NM_002139]                                                  |
| A_24_P357406  | 1,61E-04 down    | -3,2828984 RBMY1B      | Homo sapiens RNA binding motif protein, Y-linked, family 1, member B (RBMY1B), mRNA [NM_001006121]                                               |
| A_33_P3389771 | 0,023934536 up   | 1,728947 RBMY1B        | Homo sapiens RNA binding motif protein, Y-linked, family 1, member B (RBMY1B), mRNA [NM_001006121]                                               |
| A_21_P0013892 | 0,016188273 up   | 1,5743178 RBMY1B       | Homo sapiens RNA binding motif protein, Y-linked, family 1, member B (RBMY1B), mRNA [NM_001006121]                                               |
| A_23_P171397  | 0,008144339 up   | 1,6301136 RBMY1B       | Homo sapiens RNA binding motif protein, Y-linked, family 1, member B (RBMY1B), mRNA [NM_001006121]                                               |
| A_23_P257649  | 0,003163375 down | -2,151681 RBP1         | Homo sapiens retinol binding protein 1, cellular (RBP1), transcript variant 1, mRNA [NM_002899]                                                  |
| A_21_P0013567 | 2,83E-04 up      | 1,6198841 RBPJ         | Homo sapiens recombination signal binding protein for immunoglobulin kappa J region (RBPJ), transcript variant 4, mRNA [NM_203284]               |
| A_23_P71316   | 0,007061335 up   | 1,6563023 RBPMS        | Homo sapiens RNA binding protein with multiple splicing (RBPMS), transcript variant 3, mRNA [NM_001008712]                                       |
| A_23_P100056  | 0,010663555 up   | 1,7511945 RBPMS2       | Homo sapiens RNA binding protein with multiple splicing 2 (RBPMS2), mRNA [NM_194272]                                                             |
| A_33_P3263841 | 0,003475038 up   | 1,595424 RCHY1         | Homo sapiens ring finger and CHY zinc finger domain containing 1, E3 ubiquitin protein ligase (RCHY1), transcript variant 9, mRNA [NM_001278539] |
| A_23_P107132  | 0,00531427 up    | 2,1907098 RCVRN        | Homo sapiens recoverin (RCVRN), mRNA [NM_002903]                                                                                                 |
| A_33_P3373955 | 0,009006939 up   | 1,5567517 RD3          | Homo sapiens retinal degeneration 3 (RD3), transcript variant 1, mRNA [NM_183059]                                                                |
| A_32_P25050   | 1,07E-04 up      | 2,3487897 RDH10        | Homo sapiens retinol dehydrogenase 10 (all-trans) (RDH10), mRNA [NM_172037]                                                                      |

|                |             |      |            |           |                                                                                                                              |
|----------------|-------------|------|------------|-----------|------------------------------------------------------------------------------------------------------------------------------|
| A_23_P25684    | 0,001715773 | down | -1,9023782 | RDH11     | Homo sapiens retinol dehydrogenase 11 (all-trans/9-cis/11-cis) (RDH11), transcript variant 1, mRNA [NM_016026]               |
| A_23_P50291    | 0,013639935 | down | -1,8455321 | RDH8      | Homo sapiens retinol dehydrogenase 8 (all-trans) (RDH8), mRNA [NM_015725]                                                    |
| A_23_P203023   | 6,27E-04    | up   | 1,6598053  | RDX       | Homo sapiens radixin (RDX), transcript variant 3, mRNA [NM_002906]                                                           |
| A_33_P3278941  | 4,34E-04    | up   | 2,2279098  | REC8      | Homo sapiens REC8 meiotic recombination protein (REC8), transcript variant 2, mRNA [NM_001048205]                            |
| A_23_P96285    | 0,002100263 | down | -2,82486   | REEP1     | Homo sapiens receptor accessory protein 1 (REEP1), transcript variant 2, mRNA [NM_022912]                                    |
| A_33_P3369834  | 0,002428134 | down | -2,056249  | REEP6     | Homo sapiens receptor accessory protein 6 (REEP6), mRNA [NM_138393]                                                          |
| A_23_P90743    | 0,003791076 | down | -1,8567564 | REG1A     | Homo sapiens regenerating islet-derived 1 alpha (REG1A), mRNA [NM_002909]                                                    |
| A_23_P389500   | 0,012484595 | down | -2,051545  | REG1B     | Homo sapiens regenerating islet-derived 1 beta (REG1B), mRNA [NM_006507]                                                     |
| A_23_P56938    | 0,004576222 | up   | 1,5793661  | REL       | Homo sapiens v-rel avian reticuloendotheliosis viral oncogene homolog (REL), transcript variant 1, mRNA [NM_002908]          |
| A_23_P104689   | 0,009092363 | up   | 1,6518216  | RELA      | Homo sapiens v-rel avian reticuloendotheliosis viral oncogene homolog A (RELA), transcript variant 1, mRNA [NM_021975]       |
| A_24_P309095   | 0,005914027 | up   | 1,6514089  | RELN      | Homo sapiens reelin (RELN), transcript variant 1, mRNA [NM_005045]                                                           |
| A_23_P28948    | 0,04325109  | up   | 1,8310893  | REM1      | Homo sapiens RAS (RAD and GEM)-like GTP-binding 1 (REM1), mRNA [NM_014012]                                                   |
| A_33_P3305487  | 0,00113792  | up   | 1,8648372  | REM2      | Homo sapiens RAS (RAD and GEM)-like GTP binding 2 (REM2), mRNA [NM_173527]                                                   |
| A_23_P137157   | 5,89E-04    | down | -3,9303076 | RENBP     | Homo sapiens renin binding protein (RENBP), mRNA [NM_002910]                                                                 |
| A_24_P342591   | 0,005684442 | up   | 1,5617958  | RERE      | Homo sapiens arginine-glutamic acid dipeptide (RE) repeats (RERE), transcript variant 1, mRNA [NM_012102]                    |
| A_24_P321525   | 0,015343121 | down | -2,7631009 | RERG      | Homo sapiens RAS-like, estrogen-regulated, growth inhibitor (RERG), transcript variant 1, mRNA [NM_032918]                   |
| A_23_P92196    | 1,18E-06    | down | -4,9953637 | RETNLB    | Homo sapiens resistin like beta (RETNLB), mRNA [NM_032579]                                                                   |
| A_33_P3312682  | 0,025760412 | down | -1,5892729 | REXO1     | Homo sapiens REX1, RNA exonuclease 1 homolog (S. cerevisiae) (REXO1), mRNA [NM_020695]                                       |
| A_23_P18465    | 0,002443944 | up   | 1,5012732  | RFC1      | Homo sapiens replication factor C (activator 1) 1, 145kDa (RFC1), transcript variant 1, mRNA [NM_002913]                     |
| A_33_P3375790  | 6,27E-05    | down | -3,029307  | RFPL4AL1  | Homo sapiens ret finger protein-like 4A-like 1 (RFPL4AL1), mRNA [NM_001277397]                                               |
| A_33_P3366127  | 0,020132273 | up   | 1,5307356  | RFPL4AL1  | Homo sapiens ret finger protein-like 4A-like 1 (RFPL4AL1), mRNA [NM_001277397]                                               |
| A_33_P3209356  | 0,002484388 | up   | 1,5063716  | RFWD2     | Homo sapiens ring finger and WD repeat domain 2, E3 ubiquitin protein ligase (RFWD2), transcript variant 1, mRNA [NM_022457] |
| A_33_P3267460  | 5,58E-04    | down | -2,0930707 | RFX3      | Homo sapiens regulatory factor X, 3 (influences HLA class II expression) (RFX3), transcript variant 4, mRNA [NM_001282117]   |
| A_21_P0013689  | 0,0421808   | down | -1,586674  | RFX3-AS1  | Homo sapiens RFX3 antisense RNA 1 (RFX3-AS1), long non-coding RNA [NR_121586]                                                |
| A_23_P76332    | 0,008245667 | up   | 1,5964154  | RFX4      | Homo sapiens regulatory factor X, 4 (influences HLA class II expression) (RFX4), transcript variant 3, mRNA [NM_213594]      |
| A_33_P3281741  | 0,02792349  | down | -2,1476052 | RFX8      | Homo sapiens RFX family member 8, lacking RFX DNA binding domain (RFX8), mRNA [NM_001145664]                                 |
| A_19_P00319745 | 0,037639253 | down | -2,1801445 | RFX8      | Homo sapiens RFX family member 8, lacking RFX DNA binding domain (RFX8), mRNA [NM_001145664]                                 |
| A_19_P00317318 | 0,018827833 | down | -2,5100098 | RFX8      | Homo sapiens RFX family member 8, lacking RFX DNA binding domain (RFX8), mRNA [NM_001145664]                                 |
| A_33_P3240532  | 2,47E-04    | down | -3,523404  | RGL1      | Homo sapiens ral guanine nucleotide dissociation stimulator-like 1 (RGL1), transcript variant 1, mRNA [NM_015149]            |
| A_23_P114423   | 0,003127139 | up   | 2,5771427  | RGN       | Homo sapiens regucalcin (RGN), transcript variant 2, mRNA [NM_152869]                                                        |
| A_33_P3326914  | 0,028714042 | down | -1,6059132 | RGP1      | Homo sapiens RGP1 retrograde golgi transport homolog (S. cerevisiae) (RGP1), mRNA [NM_001080496]                             |
| A_21_P0002089  | 0,02962188  | down | -2,0340915 | RGPD4-AS1 | RGPD4 antisense RNA 1 (head to head) [Source:HGNC Symbol;Acc:HGNC:49273] [ENST00000417284]                                   |
| A_23_P218637   | 0,007867793 | up   | 1,6798602  | RGPD5     | Homo sapiens RANBP2-like and GRIP domain containing 5 (RGPD5), transcript variant 1, mRNA [NM_005054]                        |
| A_24_P289273   | 5,38E-04    | down | -2,7538824 | RGR       | retinal G protein coupled receptor [Source:HGNC Symbol;Acc:HGNC:9990] [ENST00000372092]                                      |
| A_23_P219197   | 8,43E-04    | down | -1,9183941 | RGS3      | Homo sapiens regulator of G-protein signaling 3 (RGS3), transcript variant 4, mRNA [NM_134427]                               |
| A_33_P3212022  | 0,003736527 | up   | 2,1705914  | RGS6      | Homo sapiens regulator of G-protein signaling 6 (RGS6), transcript variant 4, mRNA [NM_001204418]                            |
| A_32_P355943   | 0,008913815 | up   | 1,5919659  | RGSL1     | Homo sapiens regulator of G-protein signaling like 1 (RGSL1), mRNA [NM_001137669]                                            |
| A_33_P3330731  | 0,014096583 | down | -1,5629982 | RHBDD3    | rhomoid domain containing 3 [Source:HGNC Symbol;Acc:HGNC:1308] [ENST00000406335]                                             |
| A_23_P329870   | 0,001003534 | up   | 1,6771039  | RHBDF2    | Homo sapiens rhomboid 5 homolog 2 (Drosophila) (RHBDF2), transcript variant 1, mRNA [NM_024599]                              |
| A_23_P26468    | 0,001100711 | down | -2,1971986 | RHBDL1    | Homo sapiens rhomboid, veinlet-like 1 (Drosophila) (RHBDL1), transcript variant 1, mRNA [NM_001278720]                       |
| A_33_P3364661  | 0,00169643  | down | -1,9726269 | RHOA      | ras homolog family member A [Source:HGNC Symbol;Acc:HGNC:667] [ENST00000265538]                                              |
| A_24_P104119   | 0,005296737 | up   | 1,8769523  | RHOF      | Homo sapiens ras homolog family member F (in filopodia) (RHOF), mRNA [NM_019034]                                             |
| A_23_P58132    | 0,023632947 | down | -2,030157  | RHOH      | Homo sapiens ras homolog family member H (RHOH), transcript variant 6, mRNA [NM_004310]                                      |
| A_32_P49844    | 0,013334809 | down | -1,5265878 | RHOQ      | Homo sapiens ras homolog family member Q (RHOQ), mRNA [NM_012249]                                                            |
| A_33_P3222962  | 0,008586072 | up   | 2,8772078  | RIBC1     | Homo sapiens RIB43A domain with coiled-coils 1 (RIBC1), transcript variant 2, mRNA [NM_144968]                               |
| A_32_P193322   | 1,65E-04    | up   | 1,9907811  | RICTOR    | Homo sapiens RPTOR independent companion of mTOR, complex 2 (RICTOR), transcript variant 1, mRNA [NM_152756]                 |
| A_32_P334325   | 0,015734648 | down | -1,517057  | RIMBP2    | Homo sapiens RIMS binding protein 2 (RIMBP2), mRNA [NM_015347]                                                               |
| A_23_P342585   | 0,013035848 | up   | 1,5378355  | RIMS1     | regulating synaptic membrane exocytosis 1 [Source:HGNC Symbol;Acc:HGNC:17282] [ENST00000370419]                              |
| A_32_P199901   | 0,005005373 | up   | 1,5814513  | RIPPLY1   | Homo sapiens rippy transcriptional repressor 1 (RIPPLY1), transcript variant 1, mRNA [NM_138382]                             |
| A_33_P3416588  | 0,038023844 | down | -1,8489927 | RIT2      | Homo sapiens Ras-like without CAAX 2 (RIT2), transcript variant 1, mRNA [NM_002930]                                          |
| A_23_P163361   | 2,64E-04    | down | -4,6040835 | RLBP1     | Homo sapiens retinaldehyde binding protein 1 (RLBP1), mRNA [NM_000326]                                                       |
| A_33_P3236591  | 0,001729126 | down | -1,6308081 | RLTPR     | Homo sapiens RGD motif, leucine rich repeats, tropomodulin domain and proline-rich containing (RLTPR), mRNA [NM_001013838]   |
| A_33_P3401284  | 0,005443686 | down | -2,4584398 | RMRP      | Homo sapiens RNA component of mitochondrial RNA processing endoribonuclease (RMRP), RNase MRP RNA [NR_003051]                |
| A_33_P3318791  | 0,034196537 | down | -1,7561986 | RMST      | Homo sapiens rhabdomyosarcoma 2 associated transcript (non-protein coding) (RMST), long non-coding RNA [NR_024037]           |
| A_33_P3336632  | 0,002288778 | down | -1,8485851 | RNA28S5   | Homo sapiens RNA, 28S ribosomal 5 (RNA28S5), ribosomal RNA [NR_003287]                                                       |
| A_33_P3261937  | 9,49E-04    | down | -2,8908558 | RNASE13   | Homo sapiens ribonuclease, RNase A family, 13 (non-active) (RNASE13), mRNA [NM_001012264]                                    |
| A_23_P376124   | 0,002467793 | up   | 2,3158414  | RNASE8    | Homo sapiens ribonuclease, RNase A family, 8 (RNASE8), mRNA [NM_138331]                                                      |
| A_33_P3358977  | 1,66E-04    | up   | 1,7965621  | RNASEH2C  | Homo sapiens ribonuclease H2, subunit C (RNASEH2C), mRNA [NM_032193]                                                         |
| A_23_P56709    | 3,12E-05    | up   | 2,1132991  | RNF103    | Homo sapiens ring finger protein 103 (RNF103), transcript variant 1, mRNA [NM_005667]                                        |
| A_23_P107116   | 0,01365763  | up   | 1,6479564  | RNF112    | Homo sapiens ring finger protein 112 (RNF112), mRNA [NM_007148]                                                              |
| A_23_P416112   | 4,87E-04    | down | -1,8545179 | RNF168    | Homo sapiens ring finger protein 168, E3 ubiquitin protein ligase (RNF168), mRNA [NM_152617]                                 |

|                |                  |                           |                                                                                                                                |
|----------------|------------------|---------------------------|--------------------------------------------------------------------------------------------------------------------------------|
| A_23_P350172   | 0,022705125 up   | 1,5182712 RNF169          | Homo sapiens ring finger protein 169 (RNF169), mRNA [NM_001098638]                                                             |
| A_24_P23995    | 0,040603496 down | -1,6703297 RNF187         | Homo sapiens ring finger protein 187 (RNF187), mRNA [NM_001010858]                                                             |
| A_33_P3316978  | 0,02572365 up    | 1,8804259 RNF207          | Homo sapiens ring finger protein 207 (RNF207), mRNA [NM_207396]                                                                |
| A_33_P3304538  | 0,017535655 up   | 2,1021073 RNF207          | Homo sapiens ring finger protein 207 (RNF207), mRNA [NM_207396]                                                                |
| A_33_P3304533  | 0,03296044 up    | 1,93341 RNF207            | ring finger protein 207 [Source:HGNC Symbol;Acc:HGNC:32947] [ENST00000466994]                                                  |
| A_33_P3318444  | 3,03E-04 down    | -2,2894619 RNF222         | Homo sapiens ring finger protein 222 (RNF222), mRNA [NM_001146684]                                                             |
| A_24_P314931   | 0,048437648 up   | 2,2755525 RNF39           | Homo sapiens ring finger protein 39 (RNF39), transcript variant 1, mRNA [NM_025236]                                            |
| A_23_P213592   | 9,91E-05 up      | 1,8533226 RNF44           | Homo sapiens ring finger protein 44 (RNF44), mRNA [NM_014901]                                                                  |
| A_24_P260699   | 0,008258455 up   | 1,6887281 RNF8            | Homo sapiens ring finger protein 8, E3 ubiquitin protein ligase (RNF8), transcript variant 1, mRNA [NM_003958]                 |
| A_33_P3230103  | 0,025288569 down | -1,8244199 RNFT2          | Homo sapiens ring finger protein, transmembrane 2 (RNFT2), transcript variant 2, mRNA [NM_032814]                              |
| A_23_P80503    | 0,01066331 down  | -1,7480675 ROBO1          | Homo sapiens roundabout, axon guidance receptor, homolog 1 (Drosophila) (ROBO1), transcript variant 2, mRNA [NM_133631]        |
| A_33_P3278877  | 0,001325925 down | -3,667594 ROBO2           | Homo sapiens roundabout, axon guidance receptor, homolog 2 (Drosophila) (ROBO2), transcript variant 5, mRNA [NM_001290065]     |
| A_24_P538403   | 0,001914673 up   | 1,5680584 ROCK1           | Homo sapiens Rho-associated, coiled-coil containing protein kinase 1 (ROCK1), mRNA [NM_005406]                                 |
| A_23_P100499   | 0,008835088 down | -1,7705923 ROGDI          | Homo sapiens rogdi homolog (Drosophila) (ROGDI), transcript variant 1, mRNA [NM_024589]                                        |
| A_32_P184464   | 0,001026554 down | -4,394714 ROPN1           | Homo sapiens rhophilin associated tail protein 1 (ROPN1), mRNA [NM_017578]                                                     |
| A_23_P121885   | 4,78E-06 down    | 2,8940463 ROPN1L          | Homo sapiens rhophilin associated tail protein 1-like (ROPN1L), transcript variant 1, mRNA [NM_031916]                         |
| A_19_P00322190 | 0,006460912 down | -1,5520355 RP9P           | Homo sapiens retinitis pigmentosa 9 pseudogene (RP9P), non-coding RNA [NR_003500]                                              |
| A_33_P3214597  | 0,002991322 down | -1,6324142 RP9P           | Homo sapiens retinitis pigmentosa 9 pseudogene (RP9P), non-coding RNA [NR_003500]                                              |
| A_33_P3312802  | 5,42E-04 down    | -1,7872787 RPL13AP17      | Homo sapiens ribosomal protein L13a pseudogene 17 (RPL13AP17), non-coding RNA [NR_003680]                                      |
| A_24_P849801   | 0,008497959 up   | 1,5489717 RPL22           | Homo sapiens ribosomal protein L22 (RPL22), mRNA [NM_000983]                                                                   |
| A_33_P3257943  | 0,027525201 down | -1,5476283 RPL26          | Homo sapiens ribosomal protein L26 (RPL26), mRNA [NM_000987]                                                                   |
| A_21_P0011094  | 0,012183568 down | -2,2106445 RPL31          | Homo sapiens ribosomal protein L31 (RPL31), transcript variant 1, mRNA [NM_000993]                                             |
| A_33_P3278137  | 0,045787133 up   | 2,1648536 RPL31P11        | Homo sapiens ribosomal protein L31 pseudogene 11 (RPL31P11), non-coding RNA [NR_002595]                                        |
| A_21_P0012460  | 0,008111614 up   | 1,6069053 RPL32P3         | Homo sapiens ribosomal protein L32 pseudogene 3 (RPL32P3), non-coding RNA [NR_003111]                                          |
| A_24_P7629     | 0,001120603 up   | 2,6260662 RPL32P3         | Homo sapiens ribosomal protein L32 pseudogene 3 (RPL32P3), non-coding RNA [NR_003111]                                          |
| A_33_P3255647  | 0,004308448 down | -1,8121257 RPL36A-HNRNPH2 | Homo sapiens RPL36A-HNRNPH2 readthrough (RPL36A-HNRNPH2), transcript variant 1, mRNA [NM_001199973]                            |
| A_33_P3587611  | 1,38E-04 up      | 2,4769306 RPL36AP33       | Homo sapiens cDNA clone MGC:23914 IMAGE:4769647, complete cds. [BC020828]                                                      |
| A_23_P118095   | 0,032312077 down | -1,883266 RPL3L           | Homo sapiens ribosomal protein L3-like (RPL3L), mRNA [NM_005061]                                                               |
| A_33_P3291349  | 0,015244132 up   | 1,6385138 RPRD1A          | Homo sapiens regulation of nuclear pre-mRNA domain containing 1A (RPRD1A), transcript variant 4, mRNA [NM_001303413]           |
| A_24_P250499   | 8,23E-05 up      | 1,9890655 RPRD1B          | Homo sapiens regulation of nuclear pre-mRNA domain containing 1B (RPRD1B), mRNA [NM_021215]                                    |
| A_32_P203013   | 0,005437937 down | -2,5153086 RPS10P7        | Homo sapiens ribosomal protein S10 pseudogene 7 (RPS10P7), non-coding RNA [NR_026667]                                          |
| A_23_P82128    | 0,009298298 down | -1,5059098 RPS12          | Homo sapiens ribosomal protein S12 (RPS12), mRNA [NM_001016]                                                                   |
| A_33_P3357049  | 4,27E-04 up      | 2,3815944 RPS15AP10       | Homo sapiens ribosomal protein S15a pseudogene 10 (RPS15AP10), non-coding RNA [NR_026768]                                      |
| A_21_P0010964  | 0,004251708 down | -1,53368 RPS2             | Homo sapiens ribosomal protein S2 (RPS2), mRNA [NM_002952]                                                                     |
| A_33_P3345414  | 0,009726422 up   | 1,9653456 RPS4X           | ribosomal protein S4, X-linked [Source:HGNC Symbol;Acc:HGNC:10424] [ENST00000373626]                                           |
| A_24_P497226   | 0,007107258 up   | 1,5296128 RPS6KB1         | Homo sapiens ribosomal protein S6 kinase, 70kDa, polypeptide 1 (RPS6KB1), transcript variant 1, mRNA [NM_003161]               |
| A_24_P349743   | 0,007047434 down | -1,7184106 RPSAP58        | Homo sapiens ribosomal protein SA pseudogene 58 (RPSAP58), non-coding RNA [NR_003662]                                          |
| A_33_P3220728  | 6,65E-04 up      | 1,7966636 RREB1           | Homo sapiens ras responsive element binding protein 1 (RREB1), transcript variant 1, mRNA [NM_001003699]                       |
| A_24_P382017   | 4,46E-04 up      | 1,8120234 RRN3            | Homo sapiens RRN3 RNA polymerase I transcription factor homolog (S. cerevisiae) (RRN3), transcript variant 1, mRNA [NM_018427] |
| A_21_P0006626  | 0,03365857 up    | 1,8245717 RRP12           | ribosomal RNA processing 12 homolog (S. cerevisiae) [Source:HGNC Symbol;Acc:HGNC:29100] [ENST00000621606]                      |
| A_32_P221822   | 0,029378207 up   | 1,6278316 RRP15           | Homo sapiens ribosomal RNA processing 15 homolog (S. cerevisiae) (RRP15), mRNA [NM_016052]                                     |
| A_24_P242036   | 2,90E-04 down    | -1,742992 RRP7B           | Homo sapiens ribosomal RNA processing 7 homolog B (S. cerevisiae) (RRP7B), non-coding RNA [NR_002184]                          |
| A_24_P365679   | 0,02222675 up    | 1,7975917 RRP7B           | ribosomal RNA processing 7 homolog B (S. cerevisiae) [Source:HGNC Symbol;Acc:HGNC:30454] [ENST00000357802]                     |
| A_33_P3888365  | 0,001217174 up   | 1,5070258 RSBN1           | Homo sapiens round spermatid basic protein 1 (RSBN1), mRNA [NM_018364]                                                         |
| A_23_P139388   | 0,006957973 up   | 1,509701 RSF1             | Homo sapiens remodeling and spacing factor 1 (RSF1), mRNA [NM_016578]                                                          |
| A_33_P3294654  | 0,0444919 down   | -1,7498479 RSG1           | Homo sapiens REM2 and RAB-like small GTPase 1 (RSG1), mRNA [NM_030907]                                                         |
| A_23_P362736   | 0,025669498 up   | 2,3711314 RSPH10B         | Homo sapiens radial spoke head 10 homolog B (Chlamydomonas) (RSPH10B), mRNA [NM_173565]                                        |
| A_23_P67414    | 0,003329935 up   | 2,6319323 RSPH6A          | Homo sapiens radial spoke head 6 homolog A (Chlamydomonas) (RSPH6A), mRNA [NM_030785]                                          |
| A_33_P3248749  | 0,002641808 down | -1,927675 RSPH9           | radial spoke head 9 homolog (Chlamydomonas) [Source:HGNC Symbol;Acc:HGNC:21057] [ENST00000372165]                              |
| A_24_P106542   | 1,71E-06 down    | -4,568058 RSPO3           | Homo sapiens R-spondin 3 (RSPO3), mRNA [NM_032784]                                                                             |
| A_23_P53267    | 0,003116291 up   | 1,5050066 RSRC2           | Homo sapiens arginine/serine-rich coiled-coil 2 (RSRC2), transcript variant 1, mRNA [NM_023012]                                |
| A_24_P390403   | 2,35E-04 up      | 1,7353557 RTF1            | Homo sapiens Rtf1, Paf1/RNA polymerase II complex component, homolog (S. cerevisiae) (RTF1), mRNA [NM_015138]                  |
| A_33_P3362371  | 0,011861797 down | -1,6759728 RTN3           | Homo sapiens reticulon 3 (RTN3), transcript variant 7, mRNA [NM_001265591]                                                     |
| A_23_P432056   | 0,017068157 down | -2,6403542 RTN4RL1        | Homo sapiens reticulon 4 receptor-like 1 (RTN4RL1), mRNA [NM_178568]                                                           |
| A_32_P528967   | 0,010179764 down | -2,4457114 RTP1           | Homo sapiens receptor (chemosensory) transporter protein 1 (RTP1), mRNA [NM_153708]                                            |
| A_33_P3341841  | 2,04E-04 up      | 3,191923 RTP2             | Homo sapiens receptor (chemosensory) transporter protein 2 (RTP2), mRNA [NM_001004312]                                         |
| A_24_P197284   | 0,02976383 down  | -2,0681543 RTP5           | Homo sapiens receptor (chemosensory) transporter protein 5 (putative) (RTP5), mRNA [NM_173821]                                 |
| A_24_P941708   | 0,00716175 up    | 1,650449 RUFY2            | Homo sapiens RUN and FYVE domain containing 2 (RUFY2), transcript variant 2, mRNA [NM_001042417]                               |
| A_24_P221575   | 8,47E-04 down    | -2,3704712 RUFY3          | Homo sapiens RUN and FYVE domain containing 3 (RUFY3), transcript variant 1, mRNA [NM_001037442]                               |
| A_24_P91094    | 0,02140403 down  | -2,134461 RUND3A          | Homo sapiens RUN domain containing 3A (RUND3A), transcript variant 2, mRNA [NM_006695]                                         |
| A_33_P3418917  | 2,28E-04 up      | 1,7168255 RUSC1-AS1       | Homo sapiens RUSC1 antisense RNA 1 (RUSC1-AS1), mRNA [NM_001039517]                                                            |

|               |             |      |            |          |                                                                                                                     |
|---------------|-------------|------|------------|----------|---------------------------------------------------------------------------------------------------------------------|
| A_23_P363365  | 0,019214367 | down | -2,404756  | RXFP3    | Homo sapiens relaxin/insulin-like family peptide receptor 3 (RXFP3), mRNA [NM_016568]                               |
| A_24_P154142  | 0,004279739 | down | -2,6214268 | RXFP4    | Homo sapiens relaxin/insulin-like family peptide receptor 4 (RXFP4), mRNA [NM_181885]                               |
| A_23_P423197  | 0,00364023  | up   | 1,6919554  | RXRA     | Homo sapiens retinoid X receptor, alpha (RXRA), transcript variant 1, mRNA [NM_002957]                              |
| A_23_P201711  | 0,020470437 | down | -1,5268294 | S100A6   | Homo sapiens S100 calcium binding protein A6 (S100A6), mRNA [NM_014624]                                             |
| A_24_P335092  | 0,001784169 | up   | 3,75498    | SAA1     | Homo sapiens serum amyloid A1 (SAA1), transcript variant 1, mRNA [NM_000331]                                        |
| A_33_P3408913 | 0,015974768 | up   | 2,7418876  | SAA2     | Homo sapiens serum amyloid A2 (SAA2), transcript variant 2, mRNA [NM_001127380]                                     |
| A_33_P3408918 | 0,020361034 | up   | 2,394654   | SAA2     | Homo sapiens serum amyloid A2 (SAA2), transcript variant 1, mRNA [NM_030754]                                        |
| A_23_P87238   | 0,018635644 | up   | 2,870104   | SAA4     | Homo sapiens serum amyloid A4, constitutive (SAA4), mRNA [NM_006512]                                                |
| A_21_P0014499 | 1,32E-04    | down | -5,415231  | SACS-AS1 | Homo sapiens SACS antisense RNA 1 (SACS-AS1), long non-coding RNA [NR_103450]                                       |
| A_32_P130788  | 0,016074648 | up   | 2,0872233  | SAMD13   | Homo sapiens sterile alpha motif domain containing 13 (SAMD13), transcript variant 1, mRNA [NM_001010971]           |
| A_24_P175187  | 0,007095725 | up   | 1,8445222  | SAMD9    | Homo sapiens sterile alpha motif domain containing 9 (SAMD9), transcript variant 1, mRNA [NM_017654]                |
| A_33_P3406281 | 0,001567317 | down | -1,5747497 | SAMHD1   | Homo sapiens SAM domain and HD domain 1 (SAMHD1), mRNA [NM_015474]                                                  |
| A_24_P191971  | 0,002663335 | up   | 1,9733967  | SAP30L   | Homo sapiens SAP30-like (SAP30L), transcript variant 1, mRNA [NM_024632]                                            |
| A_24_P115507  | 7,57E-04    | down | -2,0262835 | SARDH    | Homo sapiens sarcosine dehydrogenase (SARDH), transcript variant 1, mRNA [NM_007101]                                |
| A_24_P35400   | 0,012271836 | up   | 1,6563976  | SARDH    | Homo sapiens sarcosine dehydrogenase (SARDH), transcript variant 1, mRNA [NM_007101]                                |
| A_24_P658584  | 0,002428395 | up   | 2,5485418  | SASH1    | Homo sapiens SAM and SH3 domain containing 1 (SASH1), mRNA [NM_015278]                                              |
| A_33_P3209279 | 0,010276693 | up   | 1,5724483  | SASH1    | Homo sapiens SAM and SH3 domain containing 1 (SASH1), mRNA [NM_015278]                                              |
| A_33_P3209283 | 0,01222463  | up   | 2,4702744  | SASH1    | SAM and SH3 domain containing 1 [Source:HGNC Symbol;Acc:HGNC:19182] [ENST00000367469]                               |
| A_24_P349151  | 0,026360476 | up   | 1,5263638  | SASS6    | Homo sapiens spindle assembly 6 homolog (C. elegans) (SASS6), mRNA [NM_194292]                                      |
| A_33_P3223602 | 0,004975528 | up   | 1,509354   | SATL1    | Homo sapiens spermidine/spermine N1-acetyl transferase-like 1 (SATL1), mRNA [NM_001012980]                          |
| A_23_P142031  | 9,08E-04    | down | -1,5599358 | SBK2     | Homo sapiens SH3 domain binding kinase family, member 2 (SBK2), mRNA [NM_001101401]                                 |
| A_33_P3237744 | 0,012145695 | down | -2,1139839 | SBK3     | Homo sapiens SH3 domain binding kinase family, member 3 (SBK3), mRNA [NM_001199824]                                 |
| A_33_P3298577 | 0,010685275 | down | -1,6371659 | SBNO1    | Homo sapiens strawberry notch homolog 1 (Drosophila) (SBNO1), transcript variant 1, mRNA [NM_001167856]             |
| A_24_P79153   | 0,008856625 | up   | 1,5400203  | SCAMP4   | Homo sapiens secretory carrier membrane protein 4 (SCAMP4), mRNA [NM_079834]                                        |
| A_33_P3259587 | 0,012732944 | down | -2,0280046 | SCAND2P  | Homo sapiens SCAN domain containing 2 pseudogene (SCAND2P), transcript variant 2, non-coding RNA [NR_003654]        |
| A_23_P205875  | 0,011283192 | down | -1,5718697 | SCAND2P  | Homo sapiens SCAN domain containing 2 pseudogene (SCAND2P), transcript variant 1, non-coding RNA [NR_004859]        |
| A_24_P162244  | 0,0343151   | up   | 1,5483806  | SCAPER   | S-phase cyclin A-associated protein in the ER [Source:HGNC Symbol;Acc:HGNC:13081] [ENST00000303521]                 |
| A_23_P163408  | 0,004678111 | up   | 1,5491894  | SCAPER   | Homo sapiens S-phase cyclin A-associated protein in the ER (SCAPER), transcript variant 1, mRNA [NM_020843]         |
| A_23_P15414   | 0,003371753 | down | -1,7558266 | SCARF1   | Homo sapiens scavenger receptor class F, member 1 (SCARF1), transcript variant 1, mRNA [NM_003693]                  |
| A_33_P3832341 | 0,002615244 | up   | 1,6130958  | SCARNA22 | AGENCOURT_10609207 NIH_MGC_126 Homo sapiens cDNA clone IMAGE:6727460 5', mRNA sequence [BU955376]                   |
| A_21_P0000349 | 0,003380718 | up   | 1,7191432  | SCARNA3  | Homo sapiens small Cajal body-specific RNA 3 (SCARNA3), guide RNA [NR_002998]                                       |
| A_33_P3460485 | 0,001448317 | up   | 2,7967365  | SCARNA4  | MR2-C10186-291100-008-f04 C10186 Homo sapiens cDNA, mRNA sequence [BF814437]                                        |
| A_33_P3274691 | 0,020779708 | down | -2,263404  | SCART1   | scavenger receptor protein family member [Source:EntrezGene;Acc:619207] [ENST00000482993]                           |
| A_33_P3247204 | 0,002139085 | down | -2,3030558 | SCART1   | scavenger receptor protein family member [Source:EntrezGene;Acc:619207] [ENST00000475114]                           |
| A_24_P385134  | 0,010877753 | up   | 1,6940075  | SCD5     | Homo sapiens stearyl-CoA desaturase 5 (SCD5), transcript variant 1, mRNA [NM_001037582]                             |
| A_24_P88696   | 0,004804327 | up   | 1,8996855  | SCG2     | Homo sapiens secretogranin II (SCG2), mRNA [NM_003469]                                                              |
| A_33_P3340869 | 8,05E-04    | down | -2,3077233 | SCGB1B2P | Homo sapiens secretoglobulin, family 1B, member 2, pseudogene (SCGB1B2P), non-coding RNA [NR_027620]                |
| A_33_P3228014 | 0,004605068 | up   | 1,5544705  | SCGB1D4  | Homo sapiens secretoglobulin, family 1D, member 4 (SCGB1D4), mRNA [NM_206998]                                       |
| A_32_P191860  | 0,001704654 | down | -2,0999014 | SCGB2B2  | Homo sapiens secretoglobulin, family 2B, member 2 (SCGB2B2), mRNA [NM_001025591]                                    |
| A_33_P3210379 | 0,030095743 | down | -1,5758264 | SCGB3A1  | Homo sapiens secretoglobulin, family 3A, member 1 (SCGB3A1), mRNA [NM_052863]                                       |
| A_23_P145006  | 0,008274924 | down | -1,7500328 | SCGB3A2  | Homo sapiens secretoglobulin, family 3A, member 2 (SCGB3A2), mRNA [NM_054023]                                       |
| A_23_P251412  | 1,22E-04    | down | -3,1759095 | SCGN     | Homo sapiens secretagogin, EF-hand calcium binding protein (SCGN), mRNA [NM_006998]                                 |
| A_33_P3332126 | 7,31E-04    | down | -1,6246885 | SCLY     | selenocysteine lyase [Source:HGNC Symbol;Acc:HGNC:18161] [ENST00000409736]                                          |
| A_33_P3319987 | 0,003056902 | up   | 1,6238405  | SCML4    | Homo sapiens sex comb on midleg-like 4 (Drosophila) (SCML4), transcript variant 1, mRNA [NM_198081]                 |
| A_32_P187571  | 0,001238136 | down | -3,9577546 | SCN2B    | Homo sapiens sodium channel, voltage gated, type II beta subunit (SCN2B), mRNA [NM_004588]                          |
| A_23_P67896   | 0,022746904 | down | -1,7484857 | SCN3A    | Homo sapiens sodium channel, voltage gated, type III alpha subunit (SCN3A), transcript variant 1, mRNA [NM_006922]  |
| A_24_P270999  | 5,35E-06    | down | -3,1011395 | SCN4A    | Homo sapiens sodium channel, voltage gated, type IV alpha subunit (SCN4A), mRNA [NM_000334]                         |
| A_33_P3391455 | 0,028006103 | down | -1,6212206 | SCN5A    | Homo sapiens sodium channel, voltage gated, type V alpha subunit (SCN5A), transcript variant 6, mRNA [NM_001160161] |
| A_33_P3408962 | 0,017416304 | down | -1,6627618 | SCN8A    | Homo sapiens sodium channel, voltage gated, type VIII alpha subunit (SCN8A), transcript variant 1, mRNA [NM_014191] |
| A_24_P3005    | 0,014355835 | down | -3,53593   | SCN9A    | Homo sapiens sodium channel, voltage gated, type IX alpha subunit (SCN9A), mRNA [NM_002977]                         |
| A_23_P128323  | 0,003147691 | up   | 2,2939777  | SCNN1A   | Homo sapiens sodium channel, non voltage gated 1 alpha subunit (SCNN1A), transcript variant 1, mRNA [NM_001038]     |
| A_23_P46412   | 0,027054822 | down | -1,6049262 | SCNN1D   | Homo sapiens sodium channel, non voltage gated 1 delta subunit (SCNN1D), transcript variant 1, mRNA [NM_001130413]  |
| A_23_P206626  | 1,36E-05    | up   | 4,2348213  | SCNN1G   | Homo sapiens sodium channel, non voltage gated 1 gamma subunit (SCNN1G), mRNA [NM_001039]                           |
| A_24_P46334   | 8,45E-04    | down | -1,7333561 | SCOC     | Homo sapiens short coiled-coil protein (SCOC), transcript variant 4, mRNA [NM_032547]                               |
| A_33_P3285893 | 0,04730037  | down | -1,5847619 | SCRN1    | Homo sapiens secernin 1 (SCRN1), transcript variant 1, mRNA [NM_001145513]                                          |
| A_33_P3235137 | 0,003217722 | up   | 1,5633991  | SCRT1    | Homo sapiens scratch family zinc finger 1 (SCRT1), mRNA [NM_031309]                                                 |
| A_33_P3252974 | 0,008450981 | up   | 1,5897673  | SCRT2    | Homo sapiens scratch family zinc finger 2 (SCRT2), mRNA [NM_033129]                                                 |
| A_33_P3417487 | 0,007327869 | down | -2,2266247 | SCUBE1   | signal peptide, CUB domain, EGF-like 1 [Source:HGNC Symbol;Acc:HGNC:13441] [ENST00000290460]                        |
| A_24_P943894  | 0,042127144 | down | -3,035487  | SCUBE3   | Homo sapiens signal peptide, CUB domain, EGF-like 3 (SCUBE3), transcript variant 1, mRNA [NM_152753]                |
| A_33_P3333712 | 0,006511398 | up   | 1,7037336  | SCYL2    | Homo sapiens SCY1-like 2 (S. cerevisiae) (SCYL2), mRNA [NM_017988]                                                  |
| A_33_P3241884 | 0,001296546 | down | -2,3102038 | SDC3     | Homo sapiens syndecan 3 (SDC3), mRNA [NM_014654]                                                                    |

|                |             |      |            |            |                                                                                                                                                                                  |
|----------------|-------------|------|------------|------------|----------------------------------------------------------------------------------------------------------------------------------------------------------------------------------|
| A_21_P0000891  | 0,003087163 | down | -2,2557697 | SDCBP2-AS1 | Homo sapiens SDCBP2 antisense RNA 1 (SDCBP2-AS1), transcript variant 1, long non-coding RNA [NR_040047]                                                                          |
| A_23_P6344     | 0,008901294 | down | -2,300249  | SDF2L1     | Homo sapiens stromal cell-derived factor 2-like 1 (SDF2L1), mRNA [NM_022044]                                                                                                     |
| A_32_P67259    | 4,66E-04    | up   | 1,5742977  | SDHA       | Homo sapiens succinate dehydrogenase complex, subunit A, flavoprotein (Fp) (SDHA), transcript variant 1, mRNA [NM_004168]                                                        |
| A_23_P2645     | 0,024030855 | down | -1,6327813 | SDS        | Homo sapiens serine dehydratase (SDS), mRNA [NM_006843]                                                                                                                          |
| A_33_P3227472  | 9,74E-04    | down | -2,3618214 | SDSL       | Homo sapiens serine dehydratase-like (SDSL), mRNA [NM_138432]                                                                                                                    |
| A_33_P3309506  | 6,68E-04    | down | -2,922057  | SEBOX      | Homo sapiens SEBOX homeobox (SEBOX), mRNA [NM_001080837]                                                                                                                         |
| A_19_P00320158 | 0,005382252 | down | -1,7128203 | SEC14L1    | Homo sapiens SEC14-like 1 (S. cerevisiae) (SEC14L1), transcript variant 6, mRNA [NM_001204408]                                                                                   |
| A_33_P3275751  | 0,006275934 | up   | 1,6549608  | SEC14L1    | Homo sapiens SEC14-like 1 (S. cerevisiae) (SEC14L1), transcript variant 7, mRNA [NM_001204410]                                                                                   |
| A_33_P3286754  | 0,014752342 | up   | 2,2516189  | SEC14L2    | Homo sapiens SEC14-like 2 (S. cerevisiae) (SEC14L2), transcript variant 2, mRNA [NM_033382]                                                                                      |
| A_33_P3418218  | 0,007625056 | up   | 2,827233   | SEC16B     | Homo sapiens SEC16 homolog B (S. cerevisiae) (SEC16B), mRNA [NM_033127]                                                                                                          |
| A_33_P3548860  | 0,015324292 | up   | 2,795894   | SEC1P      | Homo sapiens secretory blood group 1, pseudogene (SEC1P), non-coding RNA [NR_004401]                                                                                             |
| A_23_P394605   | 0,001062674 | up   | 1,7801322  | SEC24A     | Homo sapiens SEC24 family member A (SEC24A), transcript variant 1, mRNA [NM_021982]                                                                                              |
| A_33_P3331085  | 0,0090387   | up   | 1,521197   | SEC24A     | Homo sapiens SEC24 family member A (SEC24A), transcript variant 1, mRNA [NM_021982]                                                                                              |
| A_33_P3331080  | 0,04827163  | up   | 1,5309978  | SEC24A     | Homo sapiens SEC24 family member A (SEC24A), transcript variant 2, mRNA [NM_001252231]                                                                                           |
| A_23_P69683    | 6,01E-05    | up   | 1,9504158  | SEC24B     | Homo sapiens SEC24 family member B (SEC24B), transcript variant 1, mRNA [NM_006323]                                                                                              |
| A_24_P82135    | 0,036719617 | up   | 1,6079967  | SECISBP2L  | Homo sapiens SECIS binding protein 2-like (SECISBP2L), transcript variant 2, mRNA [NM_014701]                                                                                    |
| A_24_P48204    | 0,004966251 | up   | 2,7164092  | SECTM1     | Homo sapiens secreted and transmembrane 1 (SECTM1), mRNA [NM_003004]                                                                                                             |
| A_33_P3275968  | 0,049908124 | down | -1,9121857 | SEL1L      | Homo sapiens sel-1 suppressor of lin-12-like (C. elegans) (SEL1L), transcript variant 1, mRNA [NM_005065]                                                                        |
| A_33_P3341796  | 0,011339321 | up   | 1,56853    | SEL1L2     | Homo sapiens sel-1 suppressor of lin-12-like 2 (C. elegans) (SEL1L2), transcript variant 2, non-coding RNA [NR_073206]                                                           |
| A_23_P6413     | 0,007122965 | down | -1,6397164 | SELM       | Homo sapiens selenoprotein M (SELM), mRNA [NM_080430]                                                                                                                            |
| A_33_P3339100  | 0,007566612 | down | -1,8293401 | SELP       | Homo sapiens selectin P (granule membrane protein 140kDa, antigen CD62) (SELP), mRNA [NM_003005]                                                                                 |
| A_33_P3290667  | 0,003617296 | up   | 1,9427953  | SELT       | Homo sapiens selenoprotein T (SELT), mRNA [NM_016275]                                                                                                                            |
| A_33_P3212500  | 0,023072535 | down | -2,7920227 | SEMA3F-AS1 | Homo sapiens cDNA FLJ46043 fis, clone SPLEN2042051. [AK127934]                                                                                                                   |
| A_24_P261169   | 0,016342336 | up   | 2,7707102  | SEMA4D     | Homo sapiens sema domain, immunoglobulin domain (Ig), transmembrane domain (TM) and short cytoplasmic domain, (semaphorin) 4D (SEMA4D), transcript variant 1, mRNA [NM_00637]    |
| A_33_P3697530  | 0,004191086 | up   | 2,1787066  | SEMA4D     | Homo sapiens sema domain, immunoglobulin domain (Ig), transmembrane domain (TM) and short cytoplasmic domain, (semaphorin) 4D (SEMA4D), transcript variant 2, mRNA [NM_00114]    |
| A_23_P121374   | 0,04044178  | up   | 1,8364282  | SEMA5B     | Homo sapiens sema domain, seven thrombospondin repeats (type 1 and type 1-like), transmembrane domain (TM) and short cytoplasmic domain, (semaphorin) 5B (SEMA5B), transcript va |
| A_24_P213478   | 0,04866794  | up   | 3,3118303  | SEMA6A     | Homo sapiens sema domain, transmembrane domain (TM), and cytoplasmic domain, (semaphorin) 6A (SEMA6A), transcript variant 2, mRNA [NM_020796]                                    |
| A_33_P3263651  | 4,41E-04    | down | -2,652971  | SEMA6B     | Homo sapiens sema domain, transmembrane domain (TM), and cytoplasmic domain, (semaphorin) 6B (SEMA6B), mRNA [NM_032108]                                                          |
| A_33_P3258265  | 0,009179452 | up   | 1,5066835  | SEMA6C     | Homo sapiens sema domain, transmembrane domain (TM), and cytoplasmic domain, (semaphorin) 6C (SEMA6C), transcript variant 2, mRNA [NM_030913]                                    |
| A_23_P164000   | 0,011679118 | up   | 1,5801141  | SENP3      | Homo sapiens SUMO1/sentrin/SMT3 specific peptidase 3 (SENP3), mRNA [NM_015670]                                                                                                   |
| A_23_P211572   | 0,0383062   | up   | 2,549837   | SENP3      | Homo sapiens septin 3 (SEPT3), transcript variant A, mRNA [NM_145733]                                                                                                            |
| A_33_P3371425  | 6,67E-04    | down | -1,9801669 | SEPN1      | Homo sapiens selenoprotein N, 1 (SEPN1), transcript variant 1, mRNA [NM_020451]                                                                                                  |
| A_23_P121926   | 0,044758007 | up   | 1,6688346  | SEPP1      | Homo sapiens selenoprotein P, plasma, 1 (SEPP1), transcript variant 1, mRNA [NM_005410]                                                                                          |
| A_19_P00801735 | 1,61E-04    | down | -2,2395895 | SEPT7-AS1  | SEPT7 antisense RNA 1 (head to head) [Source:HGNC Symbol;Acc:HGNC:51153] [ENST00000437235]                                                                                       |
| A_19_P00318803 | 0,006127265 | down | -1,811515  | SEPT7-AS1  | Homo sapiens SEPT7 antisense RNA 1 (head to head) (SEPT7-AS1), transcript variant 2, long non-coding RNA [NR_120512]                                                             |
| A_33_P3418576  | 0,022532647 | up   | 1,5294709  | SERAC1     | Homo sapiens serine active site containing 1 (SERAC1), transcript variant 2, non-coding RNA [NR_073096]                                                                          |
| A_23_P120953   | 0,002958499 | down | -1,5509462 | SERHL2     | Homo sapiens serine hydrolase-like 2 (SERHL2), transcript variant 1, mRNA [NM_014509]                                                                                            |
| A_24_P340696   | 0,012519699 | down | -1,8857526 | SERHL2     | Homo sapiens serine hydrolase-like 2 (SERHL2), transcript variant 1, mRNA [NM_014509]                                                                                            |
| A_33_P3403936  | 0,012878682 | down | -1,9594    | SERINC4    | Homo sapiens serine incorporator 4 (SERINC4), transcript variant 1, mRNA [NM_001258031]                                                                                          |
| A_23_P423457   | 0,004363694 | up   | -1,6536953 | SERINC5    | Homo sapiens serine incorporator 5 (SERINC5), transcript variant 2, mRNA [NM_178276]                                                                                             |
| A_33_P3262470  | 3,49E-04    | down | -1,9260278 | SERP2      | stress-associated endoplasmic reticulum protein family member 2 [Source:HGNC Symbol;Acc:HGNC:20607] [ENST00000493476]                                                            |
| A_33_P3262475  | 0,027158674 | up   | 2,238935   | SERP2      | stress-associated endoplasmic reticulum protein family member 2 [Source:HGNC Symbol;Acc:HGNC:20607] [ENST00000474333]                                                            |
| A_23_P128759   | 0,002204092 | up   | 3,199516   | SERPINA10  | Homo sapiens serpin peptidase inhibitor, clade A (alpha-1 antiproteinase, antitrypsin), member 10 (SERPINA10), transcript variant 1, mRNA [NM_016186]                            |
| A_33_P3399788  | 0,005280896 | up   | 2,8176792  | SERPINA3   | Homo sapiens serpin peptidase inhibitor, clade A (alpha-1 antiproteinase, antitrypsin), member 3 (SERPINA3), mRNA [NM_001085]                                                    |
| A_23_P2920     | 0,00475104  | up   | 3,35018    | SERPINA3   | Homo sapiens serpin peptidase inhibitor, clade A (alpha-1 antiproteinase, antitrypsin), member 3 (SERPINA3), mRNA [NM_001085]                                                    |
| A_23_P162918   | 0,009459312 | up   | 2,555194   | SERPINA3   | Homo sapiens serpin peptidase inhibitor, clade A (alpha-1 antiproteinase, antitrypsin), member 3 (SERPINA3), mRNA [NM_001085]                                                    |
| A_24_P321766   | 0,007945741 | up   | 1,561504   | SERPINA5   | Homo sapiens serpin peptidase inhibitor, clade A (alpha-1 antiproteinase, antitrypsin), member 5 (SERPINA5), mRNA [NM_000624]                                                    |
| A_23_P162861   | 0,001057892 | up   | 1,8747435  | SERPINE3   | Homo sapiens serpin peptidase inhibitor, clade E (nexin, plasminogen activator inhibitor type 1), member 3 (SERPINE3), mRNA [NM_001101320]                                       |
| A_33_P3413993  | 0,032133173 | down | -1,6603845 | SERPING1   | serpin peptidase inhibitor, clade G (C1 inhibitor), member 1 [Source:HGNC Symbol;Acc:HGNC:1228] [ENST00000405496]                                                                |
| A_23_P141960   | 0,001749096 | up   | 1,5310022  | SERTAD3    | Homo sapiens SERTA domain containing 3 (SERTAD3), transcript variant 2, mRNA [NM_203344]                                                                                         |
| A_23_P318904   | 4,77E-04    | up   | 2,1115363  | SERTAD4    | Homo sapiens SERTA domain containing 4 (SERTAD4), mRNA [NM_019605]                                                                                                               |
| A_23_P361448   | 0,018529283 | down | -1,7979342 | SESN3      | Homo sapiens sestrin 3 (SESN3), transcript variant 1, mRNA [NM_144665]                                                                                                           |
| A_33_P3378047  | 0,009061265 | up   | 1,5662044  | SESTD1     | Homo sapiens SEC14 and spectrin domains 1 (SESTD1), mRNA [NM_178123]                                                                                                             |
| A_24_P917866   | 0,030245619 | down | -2,6354187 | SET        | Homo sapiens SET nuclear proto-oncogene (SET), transcript variant 2, mRNA [NM_003011]                                                                                            |
| A_23_P319895   | 2,07E-04    | up   | 2,3630521  | SETD1B     | Homo sapiens SET domain containing 1B (SETD1B), mRNA [NM_015048]                                                                                                                 |
| A_23_P44760    | 2,03E-04    | up   | 1,8022878  | SETD2      | Homo sapiens SET domain containing 2 (SETD2), mRNA [NM_014159]                                                                                                                   |
| A_33_P3315355  | 0,011300369 | up   | 1,6037974  | SETD6      | Homo sapiens SET domain containing 6 (SETD6), transcript variant 1, mRNA [NM_001160305]                                                                                          |
| A_32_P191527   | 0,002224782 | up   | 1,5663991  | SETD8      | Homo sapiens SET domain containing (lysine methyltransferase) 8 (SETD8), mRNA [NM_020382]                                                                                        |
| A_32_P191859   | 2,74E-05    | up   | 2,059747   | SETD8      | Homo sapiens SET domain containing (lysine methyltransferase) 8 (SETD8), mRNA [NM_020382]                                                                                        |
| A_33_P3353916  | 0,015137932 | down | -1,6837811 | SETMAR     | Homo sapiens SET domain and mariner transposase fusion gene (SETMAR), transcript variant 4, mRNA [NM_001276325]                                                                  |
| A_24_P235783   | 0,001490867 | up   | 1,6836509  | SF1        | splicing factor 1 [Source:HGNC Symbol;Acc:HGNC:12950] [ENST00000463343]                                                                                                          |

|               |                  |                      |                                                                                                                                    |
|---------------|------------------|----------------------|------------------------------------------------------------------------------------------------------------------------------------|
| A_23_P135914  | 0,001693261 up   | 1,5202764 SF3B3      | Homo sapiens splicing factor 3b, subunit 3, 130kDa (SF3B3), mRNA [NM_012426]                                                       |
| A_33_P3474175 | 5,07E-04 down    | -3,1075985 SFTA1P    | AGENCOURT_10018270 NIH_MGC_142 Homo sapiens cDNA clone IMAGE:6495000 5', mRNA sequence [BU601128]                                  |
| A_33_P3344574 | 2,55E-04 down    | -2,2237048 SFTPA2    | Homo sapiens surfactant protein A2 (SFTPA2), mRNA [NM_001098668]                                                                   |
| A_33_P3268919 | 0,008836153 up   | 1,6171151 SFTPA2     | Homo sapiens surfactant protein A2 (SFTPA2), mRNA [NM_001098668]                                                                   |
| A_33_P3275873 | 0,001297309 up   | 2,5635893 SFTPB      | Homo sapiens surfactant protein B (SFTPB), transcript variant 1, mRNA [NM_000542]                                                  |
| A_33_P3292896 | 0,004012996 down | -1,7495035 SFXN5     | Homo sapiens sideroflexin 5 (SFXN5), mRNA [NM_144579]                                                                              |
| A_23_P62881   | 0,005706027 down | -2,4018383 SGIP1     | Homo sapiens SH3-domain GRB2-like (endophilin) interacting protein 1 (SGIP1), mRNA [NM_032291]                                     |
| A_23_P19673   | 0,010832625 up   | 1,7149177 SGK1       | Homo sapiens serum/glucocorticoid regulated kinase 1 (SGK1), transcript variant 1, mRNA [NM_005627]                                |
| A_23_P415633  | 0,040135864 up   | 1,5395622 SGK494     | Homo sapiens uncharacterized serine/threonine-protein kinase Sgk494 (SGK494), mRNA [NM_001174103]                                  |
| A_21_P0010830 | 0,003583453 down | -2,195242 SGMS1-AS1  | Homo sapiens SGMS1 antisense RNA 1 (SGMS1-AS1), long non-coding RNA [NR_126411]                                                    |
| A_33_P3283619 | 0,029520031 up   | 1,618403 SH2D1A      | Homo sapiens SH2 domain containing 1A (SH2D1A), transcript variant 2, mRNA [NM_001114937]                                          |
| A_33_P3283616 | 0,014358903 up   | 1,5350711 SH2D1A     | Homo sapiens SH2 domain containing 1A (SH2D1A), transcript variant 1, mRNA [NM_002351]                                             |
| A_33_P3254320 | 0,012193667 up   | 1,6209673 SH2D3A     | Homo sapiens SH2 domain containing 3A (SH2D3A), mRNA [NM_005490]                                                                   |
| A_33_P3357199 | 0,022010054 down | -1,7025766 SH2D6     | Homo sapiens SH2 domain containing 6 (SH2D6), mRNA [NM_198482]                                                                     |
| A_33_P3313730 | 4,40E-05 up      | 2,2420454 SH3BP2     | Homo sapiens SH3-domain binding protein 2 (SH3BP2), transcript variant 4, mRNA [NM_001145855]                                      |
| A_32_P24585   | 0,00704676 up    | 1,5628643 SH3PXD2B   | Homo sapiens SH3 and PX domains 2B (SH3PXD2B), mRNA [NM_001017995]                                                                 |
| A_21_P0000575 | 0,023590425 up   | 1,5994538 SH3RF3-AS1 | Homo sapiens SH3RF3 antisense RNA 1 (SH3RF3-AS1), long non-coding RNA [NR_029193]                                                  |
| A_33_P3399443 | 0,019579383 down | -2,7115078 SH3TC1    | SH3 domain and tetratricopeptide repeats 1 [Source:HGNC Symbol;Acc:HGNC:26009] [ENST00000502350]                                   |
| A_23_P41390   | 6,43E-04 up      | 1,8494447 SH3TC1     | Homo sapiens SH3 domain and tetratricopeptide repeats 1 (SH3TC1), mRNA [NM_018986]                                                 |
| A_33_P3399448 | 1,05E-04 up      | 3,1648664 SH3TC1     | Homo sapiens SH3 domain and tetratricopeptide repeats 1, mRNA (cDNA clone IMAGE:6291103), complete cds. [BC068094]                 |
| A_32_P305888  | 1,34E-04 up      | 2,155385 SH3TC2      | Homo sapiens SH3 domain and tetratricopeptide repeats 2 (SH3TC2), mRNA [NM_024577]                                                 |
| A_33_P3244249 | 0,011738223 up   | 2,5555139 SH3TC2     | SH3 domain and tetratricopeptide repeats 2 [Source:HGNC Symbol;Acc:HGNC:29427] [ENST00000513604]                                   |
| A_23_P208636  | 4,76E-05 down    | -3,1542659 SHANK1    | Homo sapiens SH3 and multiple ankyrin repeat domains 1 (SHANK1), mRNA [NM_016148]                                                  |
| A_23_P424727  | 9,57E-04 down    | -2,3812509 SHANK2    | SH3 and multiple ankyrin repeat domains 2 [Source:HGNC Symbol;Acc:HGNC:14295] [ENST00000409530]                                    |
| A_21_P0000018 | 6,18E-04 down    | -3,828885 SHBG       | Homo sapiens sex hormone-binding globulin (SHBG), transcript variant 4, mRNA [NM_001146281]                                        |
| A_23_P142255  | 0,001616521 down | -1,7924905 SHD       | Homo sapiens Src homology 2 domain containing transforming protein D (SHD), mRNA [NM_020209]                                       |
| A_23_P111657  | 0,001662006 down | -2,3912683 SHH       | Homo sapiens sonic hedgehog (SHH), mRNA [NM_000193]                                                                                |
| A_23_P115573  | 4,24E-06 down    | -2,5952423 SHISA4    | Homo sapiens shisa family member 4 (SHISA4), transcript variant 1, mRNA [NM_198149]                                                |
| A_24_P161581  | 2,80E-05 down    | -2,5467992 SHISA7    | Homo sapiens shisa family member 7 (SHISA7), mRNA [NM_001145176]                                                                   |
| A_23_P390443  | 0,0108852 down   | -2,3838296 SHISA7    | Homo sapiens shisa family member 7 (SHISA7), mRNA [NM_001145176]                                                                   |
| A_33_P3222932 | 5,12E-05 down    | -3,0041356 SHISA8    | Homo sapiens shisa family member 8 (SHISA8), mRNA [NM_001207020]                                                                   |
| A_23_P22761   | 1,62E-06 down    | -6,516969 SHOX       | Homo sapiens short stature homeobox (SHOX), transcript variant 2, mRNA [NM_006883]                                                 |
| A_23_P337790  | 9,63E-04 up      | 1,5484964 SHPRH      | Homo sapiens SNF2 histone linker PHD RING helicase, E3 ubiquitin protein ligase (SHPRH), transcript variant 1, mRNA [NM_001042683] |
| A_33_P3236133 | 0,003592285 down | -2,11902 SHQ1        | Homo sapiens SHQ1, H/ACA ribonucleoprotein assembly factor (SHQ1), mRNA [NM_018130]                                                |
| A_23_P217755  | 0,001245775 up   | 1,6016028 SHROOM2    | Homo sapiens shroom family member 2 (SHROOM2), mRNA [NM_001649]                                                                    |
| A_33_P3417339 | 0,026200853 up   | 1,585902 SHROOM3     | Homo sapiens shroom family member 3 (SHROOM3), mRNA [NM_020859]                                                                    |
| A_33_P3336700 | 0,004918368 up   | 1,7366697 SHROOM3    | Homo sapiens shroom family member 3 (SHROOM3), mRNA [NM_020859]                                                                    |
| A_33_P3382493 | 0,006574431 down | -2,0962715 SIGLEC14  | Homo sapiens sialic acid binding Ig-like lectin 14 (SIGLEC14), mRNA [NM_001098612]                                                 |
| A_23_P50146   | 0,002656308 down | -2,0516112 SIGLEC15  | Homo sapiens sialic acid binding Ig-like lectin 15 (SIGLEC15), mRNA [NM_213602]                                                    |
| A_23_P4592    | 0,001608975 down | -2,6801093 SIGLEC6   | Homo sapiens sialic acid binding Ig-like lectin 6 (SIGLEC6), transcript variant 1, mRNA [NM_001245]                                |
| A_23_P132121  | 0,022151582 up   | 1,8144488 SIK1       | Homo sapiens salt-inducible kinase 1 (SIK1), mRNA [NM_173354]                                                                      |
| A_24_P329924  | 0,006482645 up   | 1,5371883 SIK3       | Homo sapiens SIK family kinase 3 (SIK3), transcript variant 1, mRNA [NM_025164]                                                    |
| A_33_P3341586 | 0,014554692 down | -1,7293783 SIL1      | Homo sapiens SIL1 nucleotide exchange factor (SIL1), transcript variant 1, mRNA [NM_001037633]                                     |
| A_23_P214743  | 0,002351229 down | -3,2233477 SIM1      | Homo sapiens single-minded family bHLH transcription factor 1 (SIM1), mRNA [NM_005068]                                             |
| A_33_P3225230 | 0,00424071 up    | 1,5198897 SIN3B      | Homo sapiens SIN3 transcription regulator family member B (SIN3B), transcript variant 1, mRNA [NM_015260]                          |
| A_23_P17456   | 1,52E-04 down    | -3,4818482 SIRPB1    | Homo sapiens signal-regulatory protein beta 1 (SIRPB1), transcript variant 1, mRNA [NM_006065]                                     |
| A_33_P3356577 | 0,002880717 down | -2,9005287 SIRPB1    | signal-regulatory protein beta 1 [Source:HGNC Symbol;Acc:HGNC:15928] [ENST00000381596]                                             |
| A_33_P3248072 | 0,010667515 down | -1,5954688 SIRPB1    | Homo sapiens signal-regulatory protein beta 1 (SIRPB1), transcript variant 3, mRNA [NM_001135844]                                  |
| A_33_P3272260 | 8,88E-04 up      | 1,6981682 SIRPB2     | Homo sapiens signal-regulatory protein beta 2 (SIRPB2), transcript variant 1, mRNA [NM_001122962]                                  |
| A_23_P307955  | 0,02712265 up    | 1,7401056 SIRT5      | Homo sapiens sirtuin 5 (SIRT5), transcript variant 2, mRNA [NM_031244]                                                             |
| A_24_P34611   | 3,03E-04 down    | -1,9670649 SIX3      | Homo sapiens SIX homeobox 3 (SIX3), mRNA [NM_005413]                                                                               |
| A_23_P106117  | 0,040168803 down | -1,8610141 SIX6      | Homo sapiens SIX homeobox 6 (SIX6), mRNA [NM_007374]                                                                               |
| A_24_P322354  | 0,021019215 up   | 1,7241764 SKA1       | Homo sapiens spindle and kinetochore associated complex subunit 1 (SKA1), transcript variant 1, mRNA [NM_001039535]                |
| A_33_P3421331 | 0,0017447 up     | 3,0815234 SKOR2      | Homo sapiens SKI family transcriptional corepressor 2 (SKOR2), transcript variant 1, mRNA [NM_001278063]                           |
| A_23_P156310  | 0,012596509 down | -1,632657 SKP2       | Homo sapiens S-phase kinase-associated protein 2, E3 ubiquitin protein ligase (SKP2), transcript variant 2, mRNA [NM_032637]       |
| A_23_P62647   | 0,026625637 down | -1,5110255 SLAMF1    | Homo sapiens signaling lymphocytic activation molecule family member 1 (SLAMF1), transcript variant 1, mRNA [NM_003037]            |
| A_24_P45451   | 0,006203731 up   | 1,8502245 SLAMF6     | Homo sapiens SLAM family member 6 (SLAMF6), transcript variant 2, mRNA [NM_052931]                                                 |
| A_24_P353638  | 0,036979973 down | -1,6753854 SLAMF7    | Homo sapiens SLAM family member 7 (SLAMF7), transcript variant 1, mRNA [NM_021181]                                                 |
| A_23_P200138  | 0,040580712 down | -1,9198127 SLAMF8    | Homo sapiens SLAM family member 8 (SLAMF8), mRNA [NM_020125]                                                                       |
| A_33_P3323048 | 0,013185269 down | -1,7119234 SLC10A7   | Homo sapiens solute carrier family 10, member 7 (SLC10A7), transcript variant 2, mRNA [NM_001029998]                               |
| A_33_P3357516 | 0,001148378 down | -2,4897714 SLC10A7   | Homo sapiens solute carrier family 10, member 7 (SLC10A7), transcript variant 3, mRNA [NM_032128]                                  |

|               |             |      |            |              |                                                                                                                                                        |
|---------------|-------------|------|------------|--------------|--------------------------------------------------------------------------------------------------------------------------------------------------------|
| A_33_P3702055 | 0,001109539 | down | -1,8588471 | SLC11A1      | Homo sapiens solute carrier family 11 (proton-coupled divalent metal ion transporter), member 1 (SLC11A1), mRNA [NM_000578]                            |
| A_33_P3212112 | 0,003545    | up   | 1,6816386  | SLC12A6      | Homo sapiens solute carrier family 12 (potassium/chloride transporter), member 6 (SLC12A6), transcript variant 5, mRNA [NM_001042496]                  |
| A_33_P3357530 | 0,02232672  | up   | 1,6010079  | SLC12A7      | Homo sapiens solute carrier family 12 (potassium/chloride transporter), member 7 (SLC12A7), mRNA [NM_006598]                                           |
| A_33_P3298861 | 0,002366021 | up   | 1,7623019  | SLC12A8      | Homo sapiens solute carrier family 12, member 8 (SLC12A8), transcript variant 1, mRNA [NM_024628]                                                      |
| A_33_P3210399 | 0,015078853 | down | -1,7171017 | SLC14A1      | Homo sapiens solute carrier family 14 (urea transporter), member 1 (Kidd blood group) (SLC14A1), transcript variant 4, mRNA [NM_001146037]             |
| A_24_P926507  | 0,006828318 | up   | 2,66991    | SLC14A1      | Homo sapiens solute carrier family 14 (urea transporter), member 1 (Kidd blood group) (SLC14A1), transcript variant 4, mRNA [NM_001146037]             |
| A_23_P27353   | 0,001830024 | down | -3,9389603 | SLC14A2      | Homo sapiens solute carrier family 14 (urea transporter), member 2 (SLC14A2), transcript variant 1, mRNA [NM_007163]                                   |
| A_24_P13311   | 0,008073097 | up   | 1,5530165  | SLC15A4      | Homo sapiens solute carrier family 15 (oligopeptide transporter), member 4 (SLC15A4), mRNA [NM_145648]                                                 |
| A_21_P0001002 | 0,04539248  | up   | 1,6861295  | SLC16A1-AS1  | Homo sapiens SLC16A1 antisense RNA 1 (SLC16A1-AS1), transcript variant 2, long non-coding RNA [NR_103744]                                              |
| A_23_P363313  | 0,021144677 | down | -1,701725  | SLC16A11     | Homo sapiens solute carrier family 16, member 11 (SLC16A11), mRNA [NM_153357]                                                                          |
| A_33_P3227920 | 0,004983796 | down | -2,0600548 | SLC16A4      | Homo sapiens solute carrier family 16, member 4 (SLC16A4), transcript variant 1, mRNA [NM_004696]                                                      |
| A_32_P130630  | 0,04545641  | up   | 2,1444921  | SLC16A7      | Homo sapiens solute carrier family 16 (monocarboxylate transporter), member 7 (SLC16A7), transcript variant 3, mRNA [NM_004731]                        |
| A_33_P3353365 | 1,31E-05    | down | -5,0477033 | SLC17A4      | solute carrier family 17, member 4 [Source:HGNC Symbol;Acc:HGNC:10932] [ENST00000397076]                                                               |
| A_33_P3379926 | 0,012111228 | up   | 1,6135839  | SLC17A4      | Homo sapiens solute carrier family 17, member 4 (SLC17A4), transcript variant 1, mRNA [NM_005495]                                                      |
| A_33_P3403162 | 0,008806555 | down | -1,7370644 | SLC18A1      | Homo sapiens solute carrier family 18 (vesicular monoamine transporter), member 1 (SLC18A1), transcript variant 4, mRNA [NM_001142325]                 |
| A_23_P160466  | 0,002230071 | up   | 1,6464821  | SLC19A2      | Homo sapiens solute carrier family 19 (thiamine transporter), member 2 (SLC19A2), mRNA [NM_006996]                                                     |
| A_23_P325562  | 0,015175088 | down | -1,5034018 | SLC1A7       | Homo sapiens solute carrier family 1 (glutamate transporter), member 7 (SLC1A7), transcript variant 4, mRNA [NM_006671]                                |
| A_33_P3386835 | 0,00521884  | up   | 1,653389   | SLC20A2      | solute carrier family 20 (phosphate transporter), member 2 [Source:HGNC Symbol;Acc:HGNC:10947] [ENST00000523340]                                       |
| A_23_P161968  | 0,006746225 | down | -2,3777614 | SLC22A10     | Homo sapiens solute carrier family 22, member 10 (SLC22A10), mRNA [NM_001039725]                                                                       |
| A_23_P47199   | 0,0079073   | down | -2,857017  | SLC22A11     | Homo sapiens solute carrier family 22 (organic anion/urate transporter), member 11 (SLC22A11), mRNA [NM_018484]                                        |
| A_23_P144123  | 0,01600522  | up   | 1,8993189  | SLC22A13     | Homo sapiens solute carrier family 22 (organic anion/urate transporter), member 13 (SLC22A13), mRNA [NM_004256]                                        |
| A_33_P3361412 | 0,001091631 | down | -1,6954598 | SLC22A15     | Homo sapiens solute carrier family 22, member 15 (SLC22A15), mRNA [NM_018420]                                                                          |
| A_23_P42004   | 0,02553769  | up   | 2,0650787  | SLC22A16     | Homo sapiens solute carrier family 22 (organic cation/carnitine transporter), member 16 (SLC22A16), mRNA [NM_033125]                                   |
| A_23_P111395  | 6,49E-07    | down | -4,483563  | SLC22A2      | Homo sapiens solute carrier family 22 (organic cation transporter), member 2 (SLC22A2), mRNA [NM_003058]                                               |
| A_24_P350228  | 0,015793215 | down | -1,5329905 | SLC22A23     | Homo sapiens solute carrier family 22, member 23 (SLC22A23), transcript variant 2, mRNA [NM_021945]                                                    |
| A_21_P0011492 | 0,01663163  | down | -1,6219758 | SLC22A31     | PREDICTED: Homo sapiens solute carrier family 22, member 31 (SLC22A31), transcript variant X3, mRNA [XM_006721147]                                     |
| A_33_P3294603 | 0,001134546 | down | -1,8143308 | SLC22A31     | Homo sapiens solute carrier family 22, member 31 (SLC22A31), mRNA [NM_001242757]                                                                       |
| A_24_P174755  | 0,045434557 | up   | 1,6351558  | SLC22A5      | Homo sapiens solute carrier family 22 (organic cation/carnitine transporter), member 5 (SLC22A5), mRNA [NM_003060]                                     |
| A_33_P3367171 | 0,015672782 | down | -2,239598  | SLC22A8      | solute carrier family 22 (organic anion transporter), member 8 [Source:HGNC Symbol;Acc:HGNC:10972] [ENST00000451262]                                   |
| A_24_P254278  | 2,32E-04    | up   | 1,7519188  | SLC23A2      | Homo sapiens solute carrier family 23 (ascorbic acid transporter), member 2 (SLC23A2), transcript variant 2, mRNA [NM_203327]                          |
| A_23_P28246   | 0,006720792 | up   | 1,6342474  | SLC23A3      | Homo sapiens solute carrier family 23, member 3 (SLC23A3), transcript variant 1, mRNA [NM_144712]                                                      |
| A_23_P503010  | 0,008530051 | down | -2,180445  | SLC24A4      | Homo sapiens solute carrier family 24 (sodium/potassium/calcium exchanger), member 4 (SLC24A4), transcript variant 1, mRNA [NM_153646]                 |
| A_33_P3387901 | 0,001848083 | down | -1,9712765 | SLC25A19     | Homo sapiens solute carrier family 25 (mitochondrial thiamine pyrophosphate carrier), member 19 (SLC25A19), transcript variant 1, mRNA [NM_001126121]  |
| A_21_P0000084 | 0,021580437 | up   | 1,7123264  | SLC25A21     | Homo sapiens solute carrier family 25 (mitochondrial oxoacidate carrier), member 21 (SLC25A21), transcript variant 1, mRNA [NM_030631]                 |
| A_21_P0006396 | 4,86E-05    | down | -2,3872218 | SLC25A25-AS1 | Homo sapiens SLC25A25 antisense RNA 1 (SLC25A25-AS1), long non-coding RNA [NR_033374]                                                                  |
| A_24_P246841  | 3,46E-05    | down | -3,9072227 | SLC25A27     | Homo sapiens solute carrier family 25, member 27 (SLC25A27), transcript variant 1, mRNA [NM_004277]                                                    |
| A_23_P77048   | 0,040437292 | down | -1,5081564 | SLC25A29     | Homo sapiens solute carrier family 25 (mitochondrial carnitine/acylcarnitine carrier), member 29 (SLC25A29), transcript variant 1, mRNA [NM_001039355] |
| A_24_P64100   | 0,02769919  | up   | 1,8741988  | SLC25A37     | solute carrier family 25 (mitochondrial iron transporter), member 37 [Source:HGNC Symbol;Acc:HGNC:29786] [ENST00000519973]                             |
| A_33_P3343210 | 0,027331894 | up   | 1,5988423  | SLC25A37     | Homo sapiens solute carrier family 25 (mitochondrial iron transporter), member 37 (SLC25A37), mRNA [NM_016612]                                         |
| A_33_P3309365 | 0,005677377 | down | -2,2763224 | SLC25A3P1    | Homo sapiens solute carrier family 25 (mitochondrial carrier; phosphate carrier), member 3 pseudogene 1 (SLC25A3P1), non-coding RNA [NR_002314]        |
| A_23_P64070   | 0,02942348  | down | -1,8379774 | SLC25A45     | Homo sapiens solute carrier family 25, member 45 (SLC25A45), transcript variant 1, mRNA [NM_182556]                                                    |
| A_23_P424051  | 0,031716976 | up   | 2,054992   | SLC25A48     | Homo sapiens solute carrier family 25, member 48 (SLC25A48), mRNA [NM_145282]                                                                          |
| A_33_P3218178 | 0,00113732  | down | -3,5651734 | SLC25A53     | Homo sapiens solute carrier family 25, member 53 (SLC25A53), mRNA [NM_0010102755]                                                                      |
| A_23_P80954   | 0,013982988 | down | -1,7716699 | SLC26A1      | Homo sapiens solute carrier family 26 (anion exchanger), member 1 (SLC26A1), transcript variant 1, mRNA [NM_022042]                                    |
| A_23_P123228  | 0,002864762 | down | -1,8581364 | SLC26A3      | Homo sapiens solute carrier family 26 (anion exchanger), member 3 (SLC26A3), mRNA [NM_000111]                                                          |
| A_23_P30950   | 0,007154253 | up   | 1,8764818  | SLC26A8      | Homo sapiens solute carrier family 26 (anion exchanger), member 8 (SLC26A8), transcript variant 1, mRNA [NM_052961]                                    |
| A_24_P179816  | 0,004392616 | down | -1,8160311 | SLC27A3      | Homo sapiens solute carrier family 27 (fatty acid transporter), member 3 (SLC27A3), mRNA [NM_024330]                                                   |
| A_23_P168551  | 0,003313331 | down | -1,8532997 | SLC29A4      | Homo sapiens solute carrier family 29 (equilibrative nucleoside transporter), member 4 (SLC29A4), transcript variant 1, mRNA [NM_001040661]            |
| A_33_P3224190 | 0,009510842 | down | -2,141082  | SLC29A4      | Homo sapiens solute carrier family 29 (equilibrative nucleoside transporter), member 4 (SLC29A4), transcript variant 1, mRNA [NM_001040661]            |
| A_33_P3694746 | 0,03243735  | down | -2,3276434 | SLC2A1-AS1   | SLC2A1 antisense RNA 1 [Source:HGNC Symbol;Acc:HGNC:44187] [ENST00000416689]                                                                           |
| A_33_P3354514 | 0,007108916 | up   | 1,8194699  | SLC2A13      | Homo sapiens solute carrier family 2 (facilitated glucose transporter), member 13, mRNA (cDNA clone MGC:48624 IMAGE:5272386), complete cds. [BC047507] |
| A_24_P1111054 | 8,56E-04    | down | -3,444315  | SLC2A5       | solute carrier family 2 (facilitated glucose/fructose transporter), member 5 [Source:HGNC Symbol;Acc:HGNC:11010] [ENST00000377414]                     |
| A_23_P160159  | 0,017002795 | up   | 1,6233834  | SLC2A5       | Homo sapiens solute carrier family 2 (facilitated glucose/fructose transporter), member 5 (SLC2A5), transcript variant 1, mRNA [NM_003039]             |
| A_33_P3238425 | 0,021308208 | up   | 2,2451806  | SLC2A7       | Homo sapiens solute carrier family 2 (facilitated glucose transporter), member 7 (SLC2A7), mRNA [NM_207420]                                            |
| A_23_P213014  | 0,010669073 | down | -1,5450764 | SLC2A9       | Homo sapiens solute carrier family 2 (facilitated glucose transporter), member 9 (SLC2A9), transcript variant 2, mRNA [NM_001001290]                   |
| A_23_P302568  | 0,027633887 | down | -2,7462046 | SLC30A3      | Homo sapiens solute carrier family 30 (zinc transporter), member 3 (SLC30A3), mRNA [NM_003459]                                                         |
| A_24_P342807  | 0,042129297 | down | -2,2207477 | SLC30A6      | Homo sapiens solute carrier family 30 (zinc transporter), member 6 (SLC30A6), transcript variant 2, mRNA [NM_017964]                                   |
| A_23_P22915   | 0,04883822  | down | -1,5949436 | SLC30A7      | Homo sapiens solute carrier family 30 (zinc transporter), member 7 (SLC30A7), transcript variant 1, mRNA [NM_133496]                                   |
| A_24_P563545  | 0,01612536  | up   | 1,5294812  | SLC30A7      | Homo sapiens solute carrier family 30 (zinc transporter), member 7 (SLC30A7), transcript variant 1, mRNA [NM_133496]                                   |
| A_33_P3283813 | 2,21E-06    | down | -3,4574656 | SLC30A8      | Homo sapiens solute carrier family 30 (zinc transporter), member 8 (SLC30A8), transcript variant 4, mRNA [NM_001172813]                                |
| A_23_P217109  | 0,048782542 | up   | 1,5038419  | SLC31A2      | Homo sapiens solute carrier family 31 (copper transporter), member 2 (SLC31A2), mRNA [NM_001860]                                                       |



|               |             |      |            |             |                                                                                                                                                                  |
|---------------|-------------|------|------------|-------------|------------------------------------------------------------------------------------------------------------------------------------------------------------------|
| A_23_P307382  | 8,71E-04    | down | -2,5674372 | SLC32A1     | Homo sapiens solute carrier family 32 (GABA vesicular transporter), member 1 (SLC32A1), mRNA [NM_080552]                                                         |
| A_23_P58729   | 0,02645983  | down | -1,6256578 | SLC34A1     | Homo sapiens solute carrier family 34 (type II sodium/phosphate cotransporter), member 1 (SLC34A1), transcript variant 1, mRNA [NM_003052]                       |
| A_33_P3297468 | 0,002485762 | down | -2,1130145 | SLC34A3     | Homo sapiens solute carrier family 34 (type II sodium/phosphate cotransporter), member 3 (SLC34A3), transcript variant 2, mRNA [NM_001177317]                    |
| A_23_P255057  | 1,01E-04    | down | -1,980482  | SLC35A5     | Homo sapiens solute carrier family 35, member A5 (SLC35A5), mRNA [NM_017945]                                                                                     |
| A_33_P3358799 | 0,003189898 | down | -1,6214565 | SLC35C2     | Homo sapiens solute carrier family 35 (GDP-fucose transporter), member C2 (SLC35C2), transcript variant 7, mRNA [NM_001281460]                                   |
| A_21_P0007577 | 0,002038199 | up   | 2,1795626  | SLC35E3     | solute carrier family 35, member E3 [Source:HGNC Symbol;Acc:HGNC:20864] [ENST00000399333]                                                                        |
| A_33_P3368506 | 0,010172435 | down | -2,1061807 | SLC38A8     | Homo sapiens solute carrier family 38, member 8 (SLC38A8), mRNA [NM_001080442]                                                                                   |
| A_24_P383356  | 0,02345179  | down | -2,0739799 | SLC39A14    | Homo sapiens solute carrier family 39 (zinc transporter), member 14 (SLC39A14), transcript variant 2, mRNA [NM_015359]                                           |
| A_33_P3418421 | 0,004413955 | up   | 2,6601036  | SLC3A1      | Homo sapiens SLC3A1 variant F (SLC3A1) mRNA, complete cds, alternatively spliced. [DQ023516]                                                                     |
| A_33_P3418417 | 0,003290925 | up   | 1,515435   | SLC3A1      | Homo sapiens SLC3A1 variant C (SLC3A1) mRNA, complete cds, alternatively spliced. [DQ023513]                                                                     |
| A_23_P86195   | 0,034199588 | up   | 1,9195367  | SLC44A3     | Homo sapiens solute carrier family 44, member 3 (SLC44A3), transcript variant 2, mRNA [NM_152369]                                                                |
| A_32_P223059  | 0,011301065 | up   | 1,5945722  | SLC45A1     | Homo sapiens solute carrier family 45, member 1 (SLC45A1), mRNA [NM_001080397]                                                                                   |
| A_33_P3224819 | 0,028564773 | up   | 1,6512384  | SLC45A4     | Homo sapiens solute carrier family 45, member 4 (SLC45A4), transcript variant 1, mRNA [NM_001286646]                                                             |
| A_24_P142503  | 0,005354099 | down | -2,0312164 | SLC47A1     | Homo sapiens solute carrier family 47 (multidrug and toxin extrusion), member 1 (SLC47A1), mRNA [NM_018242]                                                      |
| A_33_P3403399 | 0,02070439  | up   | 1,8269117  | SLC47A1     | Homo sapiens solute carrier family 47 (multidrug and toxin extrusion), member 1 (SLC47A1), mRNA [NM_018242]                                                      |
| A_23_P77980   | 0,044439267 | down | -1,510532  | SLC4A1      | Homo sapiens solute carrier family 4 (anion exchanger), member 1 (Diego blood group) (SLC4A1), mRNA [NM_000342]                                                  |
| A_24_P314786  | 0,041899208 | up   | 2,5290847  | SLC4A10     | Homo sapiens solute carrier family 4, sodium bicarbonate transporter, member 10 (SLC4A10), transcript variant 2, mRNA [NM_022058]                                |
| A_24_P75680   | 7,20E-06    | down | -2,9817424 | SLC4A8      | Homo sapiens solute carrier family 4, sodium bicarbonate cotransporter, member 8 (SLC4A8), transcript variant 4, mRNA [NM_001258402]                             |
| A_23_P15692   | 0,013870902 | down | -1,9000815 | SLC52A1     | Homo sapiens solute carrier family 52 (riboflavin transporter), member 1 (SLC52A1), transcript variant 2, mRNA [NM_017986]                                       |
| A_24_P934387  | 8,07E-04    | up   | 1,8745338  | SLC5A12     | Homo sapiens solute carrier family 5 (sodium/monocarboxylate cotransporter), member 12 (SLC5A12), mRNA [NM_178498]                                               |
| A_33_P3299399 | 0,005541632 | down | -1,8071553 | SLC5A7      | Homo sapiens solute carrier family 5 (sodium/choline cotransporter), member 7 (SLC5A7), mRNA [NM_021815]                                                         |
| A_24_P365721  | 0,031639114 | up   | 1,9860376  | SLC6A14     | Homo sapiens solute carrier family 6 (amino acid transporter), member 14 (SLC6A14), mRNA [NM_007231]                                                             |
| A_24_P820037  | 0,011228663 | down | -3,8411095 | SLC6A17     | Homo sapiens solute carrier family 6 (neutral amino acid transporter), member 17 (SLC6A17), mRNA [NM_001010898]                                                  |
| A_33_P3259022 | 0,002609086 | down | -2,0634558 | SLC6A2      | Homo sapiens solute carrier family 6 (neurotransmitter transporter), member 2 (SLC6A2), transcript variant 1, mRNA [NM_001172504]                                |
| A_23_P152995  | 0,002661013 | down | -2,4936614 | SLC6A4      | Homo sapiens solute carrier family 6 (neurotransmitter transporter), member 4 (SLC6A4), mRNA [NM_001045]                                                         |
| A_23_P116624  | 1,98E-05    | down | -2,5294485 | SLC6A5      | Homo sapiens solute carrier family 6 (neurotransmitter transporter), member 5 (SLC6A5), mRNA [NM_004211]                                                         |
| A_24_P359191  | 2,14E-05    | down | -2,7234173 | SLC6A6      | Homo sapiens solute carrier family 6 (neurotransmitter transporter), member 6 (SLC6A6), transcript variant 1, mRNA [NM_003043]                                   |
| A_33_P3316539 | 0,027641656 | up   | 3,948647   | SLC7A2      | Homo sapiens solute carrier family 7 (cationic amino acid transporter, +/- system), member 2 (SLC7A2), transcript variant 2, mRNA [NM_001008539]                 |
| A_33_P3310301 | 0,001342012 | down | -2,880075  | SLC7A8      | Homo sapiens solute carrier family 7 (amino acid transporter light chain, L system), member 8 (SLC7A8), transcript variant 1, mRNA [NM_012244]                   |
| A_33_P3262156 | 0,004728272 | down | -2,237327  | SLC8A1      | Homo sapiens solute carrier family 8 (sodium/calcium exchanger), member 1 (SLC8A1), transcript variant A, mRNA [NM_021097]                                       |
| A_33_P3267059 | 0,04659394  | up   | 1,8846856  | SLC9A1      | solute carrier family 9, subfamily A (NHE1, cation proton antiporter 1), member 1 [Source:HGNC Symbol;Acc:HGNC:11071] [ENST00000374084]                          |
| A_21_P0011428 | 0,007678522 | down | -3,0934849 | SLC9B1      | Homo sapiens solute carrier family 9, subfamily B (NHA1, cation proton antiporter 1), member 1 (SLC9B1), transcript variant 2, mRNA [NM_001100874]               |
| A_32_P69802   | 0,004670263 | up   | 1,856972   | SLCO1A2     | Homo sapiens solute carrier organic anion transporter family, member 1A2 (SLCO1A2), transcript variant 1, mRNA [NM_134431]                                       |
| A_23_P116868  | 0,009805758 | up   | 1,9067334  | SLCO1C1     | Homo sapiens solute carrier organic anion transporter family, member 1C1 (SLCO1C1), transcript variant 2, mRNA [NM_017435]                                       |
| A_23_P150768  | 0,022071289 | up   | 1,5862137  | SLCO2B1     | Homo sapiens solute carrier organic anion transporter family, member 2B1 (SLCO2B1), transcript variant 1, mRNA [NM_007256]                                       |
| A_23_P5903    | 0,030531606 | up   | 2,5411322  | SLCO4A1     | Homo sapiens solute carrier organic anion transporter family, member 4A1 (SLCO4A1), mRNA [NM_016354]                                                             |
| A_33_P3381235 | 0,03067456  | down | -1,7796967 | SLCO4A1-AS1 | Homo sapiens SLCO4A1 antisense RNA 1 (SLCO4A1-AS1), long non-coding RNA [NR_024470]                                                                              |
| A_23_P81484   | 0,001768669 | down | -2,3279634 | SLCO4C1     | Homo sapiens PRO2176 mRNA, complete cds. [AF119865]                                                                                                              |
| A_23_P135669  | 0,006638752 | down | -2,314436  | SLCO5A1     | Homo sapiens solute carrier organic anion transporter family, member 5A1 (SLCO5A1), transcript variant 1, mRNA [NM_030958]                                       |
| A_33_P3209522 | 0,009198317 | down | -1,5086755 | SLFN5       | Homo sapiens schlafen family member 5 (SLFN5), mRNA [NM_144975]                                                                                                  |
| A_21_P0008099 | 3,32E-04    | down | -3,884536  | SLITRK5     | SLIT and NTRK-like family, member 5 [Source:HGNC Symbol;Acc:HGNC:20295] [ENST00000325089]                                                                        |
| A_33_P3230189 | 4,91E-06    | down | -4,519842  | SLITRK6     | Homo sapiens SLIT and NTRK-like family, member 6 (SLITRK6), mRNA [NM_032229]                                                                                     |
| A_24_P146670  | 0,018891655 | up   | 1,7328757  | SLK         | Homo sapiens STE20-like kinase (SLK), mRNA [NM_014720]                                                                                                           |
| A_33_P3243399 | 4,64E-04    | up   | 1,8441696  | SLMAP       | sarcolemma associated protein [Source:HGNC Symbol;Acc:HGNC:16643] [ENST00000467901]                                                                              |
| A_33_P3243394 | 0,0323867   | up   | 1,5183936  | SLMAP       | sarcolemma associated protein [Source:HGNC Symbol;Acc:HGNC:16643] [ENST00000383718]                                                                              |
| A_24_P288424  | 0,034604963 | up   | 1,5011522  | SLMO2       | Homo sapiens slowmo homolog 2 (Drosophila) (SLMO2), transcript variant 1, mRNA [NM_016045]                                                                       |
| A_33_P3287892 | 5,62E-04    | up   | 2,7001781  | SLTM        | SAFB-like, transcription modulator [Source:HGNC Symbol;Acc:HGNC:20709] [ENST00000480144]                                                                         |
| A_24_P174824  | 0,010369504 | up   | 1,5047495  | SLU7        | Homo sapiens SLU7 splicing factor homolog (S. cerevisiae) (SLU7), mRNA [NM_006425]                                                                               |
| A_33_P3382281 | 0,017420491 | down | -1,9741542 | SLX4IP      | SLX4 interacting protein [Source:HGNC Symbol;Acc:HGNC:16225] [ENST00000488816]                                                                                   |
| A_23_P48936   | 0,010684421 | up   | 2,0509565  | SMAD3       | Homo sapiens SMAD family member 3 (SMAD3), transcript variant 1, mRNA [NM_005902]                                                                                |
| A_23_P55518   | 0,03445947  | up   | 1,5518922  | SMAD7       | Homo sapiens SMAD family member 7 (SMAD7), transcript variant 1, mRNA [NM_005904]                                                                                |
| A_23_P406330  | 9,49E-04    | up   | 2,0307677  | SMAP2       | Homo sapiens small ArfGAP2 (SMAP2), transcript variant 1, mRNA [NM_022733]                                                                                       |
| A_23_P252764  | 0,009426246 | down | -1,5202755 | SMARCA2     | Homo sapiens SWI/SNF related, matrix associated, actin dependent regulator of chromatin, subfamily a, member 2 (SMARCA2), transcript variant 2, mRNA [NM_139045] |
| A_21_P0014445 | 0,001637447 | down | -1,9633157 | SMARCA5-AS1 | Homo sapiens SMARCA5 antisense RNA 1 (SMARCA5-AS1), long non-coding RNA [NR_104027]                                                                              |
| A_23_P66487   | 0,006530827 | up   | 1,5353471  | SMARCD2     | Homo sapiens SWI/SNF related, matrix associated, actin dependent regulator of chromatin, subfamily d, member 2 (SMARCD2), mRNA [NM_001098426]                    |
| A_32_P126609  | 0,001883346 | up   | 1,779294   | SMC5        | Homo sapiens structural maintenance of chromosomes 5 (SMC5), mRNA [NM_015110]                                                                                    |
| A_33_P3877739 | 0,01878333  | down | -2,0573351 | SMCR2       | ag52h12.x5 Gessler Wilms tumor Homo sapiens cDNA clone IMAGE:1126631 3', mRNA sequence [AI821758]                                                                |
| A_33_P3294679 | 0,002908388 | up   | 2,527971   | SMCR5       | Homo sapiens Smith-Magenis syndrome chromosome region, candidate 5 (non-protein coding) (SMCR5), long non-coding RNA [NR_024007]                                 |
| A_33_P3877728 | 0,013347329 | up   | 1,6442406  | SMCR6       | Homo sapiens mRNA; cDNA DKFP686J19223 (from clone DKFP686J19223). [BX647090]                                                                                     |
| A_23_P300124  | 0,001975502 | down | -1,6241792 | SMCR8       | Homo sapiens Smith-Magenis syndrome chromosome region, candidate 8 (SMCR8), mRNA [NM_144775]                                                                     |
| A_23_P218158  | 5,27E-04    | up   | 1,56849    | SMEK1       | Homo sapiens SMEK homolog 1, suppressor of mek1 (Dictyostelium) (SMEK1), transcript variant 3, mRNA [NM_001284280]                                               |

|                |                  |                      |                                                                                                                                                    |
|----------------|------------------|----------------------|----------------------------------------------------------------------------------------------------------------------------------------------------|
| A_33_P3391905  | 0,012787901 up   | 1,5408386 SMEK3P     | Homo sapiens cDNA FLJ16643 fis, clone TEST14029528. [AK131475]                                                                                     |
| A_24_P244952   | 7,07E-06 up      | 2,121456 SMG1        | Homo sapiens SMG1 phosphatidylinositol 3-kinase-related kinase (SMG1), mRNA [NM_015092]                                                            |
| A_33_P3326349  | 0,00239346 down  | -1,6047401 SMG5      | Homo sapiens SMG5 nonsense mediated mRNA decay factor (SMG5), mRNA [NM_015327]                                                                     |
| A_33_P3356031  | 0,016013835 up   | 1,6145606 SMG7       | SMG7 nonsense mediated mRNA decay factor [Source:HGNC Symbol;Acc:HGNC:16792] [ENST00000367538]                                                     |
| A_21_P0000896  | 0,007021104 up   | 2,0751615 SMG7-AS1   | Homo sapiens SMG7 antisense RNA 1 (SMG7-AS1), long non-coding RNA [NR_040063]                                                                      |
| A_21_P0011718  | 0,021553854 up   | 1,6233528 SMIM17     | Homo sapiens small integral membrane protein 17 (SMIM17), mRNA [NM_001193628]                                                                      |
| A_21_P0000170  | 0,042239547 up   | 1,5834745 SMIM18     | Homo sapiens small integral membrane protein 18 (SMIM18), mRNA [NM_001206847]                                                                      |
| A_23_P151361   | 0,02445642 down  | -2,1034245 SMIM2     | Homo sapiens small integral membrane protein 2 (SMIM2), mRNA [NM_024058]                                                                           |
| A_19_P00810806 | 1,37E-04 down    | -2,4049666 SMIM2-AS1 | Homo sapiens SMIM2 antisense RNA 1 (SMIM2-AS1), transcript variant 1, long non-coding RNA [NR_104064]                                              |
| A_19_P00319971 | 0,019625295 down | -1,5658339 SMIM2-AS1 | Homo sapiens SMIM2 antisense RNA 1 (SMIM2-AS1), transcript variant 1, long non-coding RNA [NR_104064]                                              |
| A_21_P0000125  | 0,004087763 up   | 1,7251751 SMKR1      | Homo sapiens small lysine-rich protein 1 (SMKR1), mRNA [NM_001195243]                                                                              |
| A_24_P463929   | 0,014470084 up   | 1,5228747 SMLR1      | Homo sapiens small leucine-rich protein 1 (SMLR1), mRNA [NM_001195597]                                                                             |
| A_19_P00319854 | 0,028193438 down | -1,5991454 SNAI3-AS1 | Homo sapiens SNAI3 antisense RNA 1 (SNAI3-AS1), transcript variant 2, long non-coding RNA [NR_024399]                                              |
| A_33_P3338693  | 0,003532762 down | -2,9789348 SNAP25    | Homo sapiens synaptosomal-associated protein, 25kDa (SNAP25), transcript variant 1, mRNA [NM_003081]                                               |
| A_33_P3316118  | 8,18E-04 down    | -2,6062465 SNAP91    | Homo sapiens synaptosomal-associated protein, 91kDa (SNAP91), transcript variant 6, mRNA [NM_001256717]                                            |
| A_33_P3335746  | 0,047957446 up   | 2,0194252 SNAPC5     | Homo sapiens small nuclear RNA activating complex, polypeptide 5, 19kDa (SNAPC5), mRNA [NM_006049]                                                 |
| A_33_P3786807  | 0,003366749 down | -3,0502307 SNAR-E    | UI-H-DF1-auh-i-18-0-UI.s1 NCI_CGAP_DF1 Homo sapiens cDNA clone UI-H-DF1-auh-i-18-0-UI 3', mRNA sequence [CA436475]                                 |
| A_33_P3542886  | 0,026648767 up   | 1,6260659 SNAR-G1    | AGENCOURT_10224340 NIH_MGC_141 Homo sapiens cDNA clone IMAGE:6565454 5', mRNA sequence [BU536871]                                                  |
| A_21_P0000512  | 0,002967795 down | -2,19212 SNAR-I      | Homo sapiens small ILF3/NF90-associated RNA I (SNAR-I), small nuclear RNA [NR_024343]                                                              |
| A_23_P29939    | 0,012662336 down | -1,7152753 SNCA      | Homo sapiens synuclein, alpha (non A4 component of amyloid precursor) (SNCA), transcript variant 4, mRNA [NM_007308]                               |
| A_24_P389285   | 0,03252091 down  | -1,8939469 SND1-IT1  | Homo sapiens SND1 intronic transcript 1 (non-protein coding) (SND1-IT1), long non-coding RNA [NR_027330]                                           |
| A_33_P3507562  | 0,048725072 down | -1,9155712 SNHG1     | AGENCOURT_6573317 NIH_MGC_124 Homo sapiens cDNA clone IMAGE:5732165 5', mRNA sequence [BM548627]                                                   |
| A_23_P74581    | 0,003234041 up   | 1,530148 SNHG12      | Homo sapiens small nucleolar RNA host gene 12 (non-protein coding) (SNHG12), long non-coding RNA [NR_024127]                                       |
| A_19_P00807665 | 0,021916734 up   | 1,6464124 SNHG18     | Homo sapiens small nucleolar RNA host gene 18 (non-protein coding) (SNHG18), long non-coding RNA [NR_045196]                                       |
| A_32_P8529     | 9,41E-04 up      | 2,0456448 SNHG20     | Homo sapiens small nucleolar RNA host gene 20 (non-protein coding) (SNHG20), long non-coding RNA [NR_027058]                                       |
| A_19_P00810899 | 9,17E-04 up      | 2,0027947 SNHG20     | Homo sapiens small nucleolar RNA host gene 20 (non-protein coding) (SNHG20), long non-coding RNA [NR_027058]                                       |
| A_19_P00320090 | 0,001525283 up   | 1,8496276 SNHG20     | Homo sapiens small nucleolar RNA host gene 20 (non-protein coding) (SNHG20), long non-coding RNA [NR_027058]                                       |
| A_19_P00316919 | 0,002560078 up   | 1,7003634 SNHG20     | Homo sapiens small nucleolar RNA host gene 20 (non-protein coding) (SNHG20), long non-coding RNA [NR_027058]                                       |
| A_21_P0014623  | 0,036497187 up   | 1,5703735 SNHG21     | Homo sapiens small nucleolar RNA host gene 21 (non-protein coding) (SNHG21), transcript variant 1, long non-coding RNA [NR_110096]                 |
| A_33_P3280945  | 0,013466674 up   | 1,8244015 SNHG3      | Homo sapiens small nucleolar RNA host gene 3 (non-protein coding) (SNHG3), transcript variant 1, long non-coding RNA [NR_036473]                   |
| A_24_P276531   | 0,001915744 up   | 1,6597381 SNIP1      | Homo sapiens Smad nuclear interacting protein 1 (SNIP1), mRNA [NM_024700]                                                                          |
| A_33_P3563369  | 0,010538275 up   | 1,744467 SNORA10     | CM1-HT1146-090101-713-g10 HT1146 Homo sapiens cDNA, mRNA sequence [BG987537]                                                                       |
| A_21_P0000309  | 0,010939649 down | -1,7752984 SNORA11   | Homo sapiens small nucleolar RNA, H/ACA box 11 (SNORA11), small nucleolar RNA [NR_002953]                                                          |
| A_21_P0000313  | 0,002539149 down | -2,2453315 SNORA15   | Homo sapiens small nucleolar RNA, H/ACA box 15 (SNORA15), small nucleolar RNA [NR_002957]                                                          |
| A_21_P0000494  | 0,044834394 down | -2,3159316 SNORA16B  | Homo sapiens small nucleolar RNA, H/ACA box 16B (SNORA16B), small nucleolar RNA [NR_004389]                                                        |
| A_33_P3892710  | 0,024733124 down | -1,7523577 SNORA22   | DKFZp686E1139_r1 686 (synonym: hlcc3) Homo sapiens cDNA clone DKFZp686E1139 5', mRNA sequence [AL706006]                                           |
| A_21_P0000321  | 0,020935867 up   | 1,5061066 SNORA31    | Homo sapiens small nucleolar RNA, H/ACA box 31 (SNORA31), small nucleolar RNA [NR_002967]                                                          |
| A_33_P3650353  | 0,002011514 up   | 2,5030046 SNORA33    | wm38b12.x1 NCI_CGAP_Ut4 Homo sapiens cDNA clone IMAGE:2438207 3' similar to gb:X53505 40S RIBOSOMAL PROTEIN S12 (HUMAN);, mRNA sequence [A1887274] |
| A_21_P0000322  | 0,048445106 down | -1,6067711 SNORA34   | Homo sapiens small nucleolar RNA, H/ACA box 34 (SNORA34), small nucleolar RNA [NR_002968]                                                          |
| A_21_P0000273  | 0,036137193 up   | 1,5086809 SNORA41    | Homo sapiens small nucleolar RNA, H/ACA box 41 (SNORA41), small nucleolar RNA [NR_002590]                                                          |
| A_21_P0000331  | 0,012142163 up   | 1,5566672 SNORA44    | Homo sapiens small nucleolar RNA, H/ACA box 44 (SNORA44), small nucleolar RNA [NR_002976]                                                          |
| A_21_P0000357  | 9,16E-04 down    | -1,7703443 SNORA47   | Homo sapiens small nucleolar RNA, H/ACA box 47 (SNORA47), small nucleolar RNA [NR_003014]                                                          |
| A_21_P0000334  | 0,016384328 down | -1,6220205 SNORA49   | Homo sapiens small nucleolar RNA, H/ACA box 49 (SNORA49), small nucleolar RNA [NR_002979]                                                          |
| A_21_P0000269  | 0,016314311 up   | 1,5530452 SNORA52    | Homo sapiens small nucleolar RNA, H/ACA box 52 (SNORA52), small nucleolar RNA [NR_002585]                                                          |
| A_33_P3462692  | 0,031632207 up   | 2,3233082 SNORA58    | hz67c08.x1 NCI_CGAP_Lu24 Homo sapiens cDNA clone IMAGE:3213038 3', mRNA sequence [BE467637]                                                        |
| A_33_P3419458  | 0,001175921 up   | 1,7382413 SNORA59B   | Homo sapiens small nucleolar RNA, H/ACA box 59B (SNORA59B), small nucleolar RNA [NR_003022]                                                        |
| A_21_P0000342  | 0,039600268 down | -1,7485112 SNORA5B   | Homo sapiens small nucleolar RNA, H/ACA box 5B (SNORA5B), small nucleolar RNA [NR_002990]                                                          |
| A_33_P3465703  | 4,80E-04 down    | -4,2223706 SNORA60   | 601888042F1 NIH_MGC_17 Homo sapiens cDNA clone IMAGE:4121819 5', mRNA sequence [BF304636]                                                          |
| A_21_P0000340  | 0,005858892 down | -2,1300526 SNORA60   | Homo sapiens small nucleolar RNA, H/ACA box 60 (SNORA60), small nucleolar RNA [NR_002986]                                                          |
| A_21_P0000341  | 0,006828111 up   | 1,7214358 SNORA61    | Homo sapiens small nucleolar RNA, H/ACA box 61 (SNORA61), small nucleolar RNA [NR_002987]                                                          |
| A_21_P0000270  | 0,008712771 down | -1,7762682 SNORA63   | Homo sapiens small nucleolar RNA, H/ACA box 63 (SNORA63), small nucleolar RNA [NR_002586]                                                          |
| A_21_P0000236  | 0,006464346 up   | 1,6503971 SNORA64    | Homo sapiens small nucleolar RNA, H/ACA box 64 (SNORA64), small nucleolar RNA [NR_002326]                                                          |
| A_21_P0000251  | 0,015205678 up   | 1,5664947 SNORA65    | Homo sapiens small nucleolar RNA, H/ACA box 65 (SNORA65), small nucleolar RNA [NR_002449]                                                          |
| A_21_P0000295  | 0,006032473 up   | 1,5848244 SNORA67    | Homo sapiens small nucleolar RNA, H/ACA box 67 (SNORA67), small nucleolar RNA [NR_002912]                                                          |
| A_21_P0000212  | 5,82E-04 up      | 1,8266126 SNORA68    | Homo sapiens small nucleolar RNA, H/ACA box 68 (SNORA68), small nucleolar RNA [NR_000012]                                                          |
| A_21_P0000475  | 0,043606266 up   | 1,5940142 SNORA70B   | Homo sapiens small nucleolar RNA, H/ACA box 70B (SNORA70B), small nucleolar RNA [NR_003707]                                                        |
| A_21_P0000593  | 0,015089021 up   | 1,6602123 SNORA70D   | Homo sapiens small nucleolar RNA, H/ACA box 70D (SNORA70D), small nucleolar RNA [NR_033337]                                                        |
| A_21_P0000591  | 0,011378228 up   | 1,5358397 SNORA70F   | Homo sapiens small nucleolar RNA, H/ACA box 70F (SNORA70F), small nucleolar RNA [NR_033309]                                                        |
| A_21_P0000592  | 0,039196156 up   | 1,5337374 SNORA70G   | Homo sapiens small nucleolar RNA, H/ACA box 70G (SNORA70G), small nucleolar RNA [NR_033335]                                                        |
| A_33_P3495962  | 0,009419474 down | -2,0101612 SNORA71A  | AGENCOURT_6611325 NIH_MGC_106 Homo sapiens cDNA clone IMAGE:5485440 5', mRNA sequence [BM918074]                                                   |
| A_21_P0000327  | 0,003137789 down | -2,5250878 SNORA71E  | Homo sapiens small nucleolar RNA, H/ACA box 71E (SNORA71E), small nucleolar RNA [NR_002972]                                                        |

|                |             |      |            |             |                                                                                                                                  |
|----------------|-------------|------|------------|-------------|----------------------------------------------------------------------------------------------------------------------------------|
| A_33_P3327519  | 0,013498295 | down | -1,8012974 | SNORA74A    | Homo sapiens small nucleolar RNA, H/ACA box 74A (SNORA74A), small nucleolar RNA [NR_002915]                                      |
| A_33_P3876591  | 0,04042346  | down | -1,8173707 | SNORA76C    | AGENCOURT_13972169 NIH_MGC_173 Homo sapiens cDNA 5', mRNA sequence [CD050382]                                                    |
| A_33_P3579391  | 0,024037624 | up   | 1,7647849  | SNORA77     | DB361496 MAMMA1 Homo sapiens cDNA clone MAMMA1001810 3', mRNA sequence [DB361496]                                                |
| A_21_P0000308  | 0,005737074 | down | -1,6070489 | SNORA9      | Homo sapiens small nucleolar RNA, H/ACA box 9 (SNORA9), small nucleolar RNA [NR_002952]                                          |
| A_21_P0000463  | 0,001129832 | down | -2,49153   | SNORD105B   | Homo sapiens small nucleolar RNA, C/D box 105B (SNORD105B), small nucleolar RNA [NR_003688]                                      |
| A_21_P0000366  | 0,012617496 | up   | 1,5168216  | SNORD11     | Homo sapiens small nucleolar RNA, C/D box 11 (SNORD11), small nucleolar RNA [NR_003031]                                          |
| A_21_P0000415  | 0,009631189 | up   | 1,5934927  | SNORD114-18 | Homo sapiens small nucleolar RNA, C/D box 114-18 (SNORD114-18), small nucleolar RNA [NR_003211]                                  |
| A_21_P0000456  | 0,001632496 | up   | 1,8205398  | SNORD115-48 | Homo sapiens small nucleolar RNA, C/D box 115-48 (SNORD115-48), small nucleolar RNA [NR_003362]                                  |
| A_21_P0000447  | 0,003665484 | down | -3,2352173 | SNORD116-11 | Homo sapiens small nucleolar RNA, C/D box 116-11 (SNORD116-11), small nucleolar RNA [NR_003326]                                  |
| A_21_P0000448  | 0,018371584 | down | -2,4427204 | SNORD116-12 | Homo sapiens small nucleolar RNA, C/D box 116-12 (SNORD116-12), small nucleolar RNA [NR_003327]                                  |
| A_21_P0000445  | 0,043550096 | down | -1,7331018 | SNORD116-6  | Homo sapiens small nucleolar RNA, C/D box 116-6 (SNORD116-6), small nucleolar RNA [NR_003321]                                    |
| A_21_P0000398  | 0,007444821 | down | -1,9945382 | SNORD117    | Homo sapiens small nucleolar RNA, C/D box 117 (SNORD117), small nucleolar RNA [NR_003140]                                        |
| A_21_P0000459  | 0,014022734 | up   | 1,6801827  | SNORD119    | Homo sapiens small nucleolar RNA, C/D box 119 (SNORD119), small nucleolar RNA [NR_003684]                                        |
| A_21_P0000460  | 0,003709252 | down | -1,9065627 | SNORD121A   | Homo sapiens small nucleolar RNA, C/D box 121A (SNORD121A), small nucleolar RNA [NR_003685]                                      |
| A_33_P3578325  | 0,009560458 | down | -1,9017425 | SNORD15A    | Homo sapiens small nucleolar RNA, C/D box 15A (SNORD15A), small nucleolar RNA [NR_000005]                                        |
| A_21_P0000247  | 0,03509152  | up   | 1,5110737  | SNORD18C    | Homo sapiens small nucleolar RNA, C/D box 18C (SNORD18C), small nucleolar RNA [NR_002443]                                        |
| A_21_P0000496  | 0,02720046  | up   | 1,6064279  | SNORD1A     | Homo sapiens small nucleolar RNA, C/D box 1A (SNORD1A), small nucleolar RNA [NR_004395]                                          |
| A_21_P0000208  | 0,017108412 | up   | 1,5037471  | SNORD22     | Homo sapiens small nucleolar RNA, C/D box 22 (SNORD22), small nucleolar RNA [NR_000008]                                          |
| A_21_P0000217  | 8,66E-04    | up   | 2,4410224  | SNORD36B    | Homo sapiens small nucleolar RNA, C/D box 36B (SNORD36B), small nucleolar RNA [NR_000017]                                        |
| A_21_P0000216  | 0,001096856 | up   | 1,8858453  | SNORD36C    | Homo sapiens small nucleolar RNA, C/D box 36C (SNORD36C), small nucleolar RNA [NR_000016]                                        |
| A_21_P0000277  | 0,042853054 | down | -1,6330094 | SNORD37     | Homo sapiens small nucleolar RNA, C/D box 37 (SNORD37), small nucleolar RNA [NR_002602]                                          |
| A_21_P0000213  | 0,013207308 | up   | 1,6422514  | SNORD42B    | Homo sapiens small nucleolar RNA, C/D box 42B (SNORD42B), small nucleolar RNA [NR_000013]                                        |
| A_21_P0000287  | 0,00260944  | up   | 1,5744709  | SNORD47     | Homo sapiens small nucleolar RNA, C/D box 47 (SNORD47), small nucleolar RNA [NR_002746]                                          |
| A_21_P0000210  | 0,015711462 | up   | 1,6161708  | SNORD4A     | Homo sapiens small nucleolar RNA, C/D box 4A (SNORD4A), small nucleolar RNA [NR_000010]                                          |
| A_21_P0000282  | 0,034710076 | up   | 1,5615475  | SNORD56     | Homo sapiens small nucleolar RNA, C/D box 56 (SNORD56), small nucleolar RNA [NR_002739]                                          |
| A_21_P0000297  | 2,87E-05    | down | -3,424353  | SNORD62A    | Homo sapiens small nucleolar RNA, C/D box 62A (SNORD62A), small nucleolar RNA [NR_002914]                                        |
| A_21_P0000378  | 0,012299744 | down | -1,5496659 | SNORD66     | Homo sapiens small nucleolar RNA, C/D box 66 (SNORD66), small nucleolar RNA [NR_003055]                                          |
| A_21_P0000371  | 0,01607081  | up   | 1,7449336  | SNORD7      | Homo sapiens small nucleolar RNA, C/D box 7 (SNORD7), small nucleolar RNA [NR_003037]                                            |
| A_33_P3843358  | 0,012032601 | up   | 1,7385544  | SNORD8      | ax47d11.x1 Proliferating Human Erythroid Cells (LCB.ax library) Homo sapiens cDNA clone ax47d11 random, mRNA sequence [BG944179] |
| A_21_P0000384  | 0,016472233 | down | -2,0231233 | SNORD85     | Homo sapiens small nucleolar RNA, C/D box 85 (SNORD85), small nucleolar RNA [NR_003066]                                          |
| A_21_P0000500  | 0,012820842 | up   | 1,5940045  | SNORD86     | Homo sapiens small nucleolar RNA, C/D box 86 (SNORD86), small nucleolar RNA [NR_004399]                                          |
| A_21_P0000501  | 0,015770653 | down | -1,5651679 | SNORD97     | Homo sapiens small nucleolar RNA, C/D box 97 (SNORD97), small nucleolar RNA [NR_004403]                                          |
| A_21_P0000392  | 0,020515464 | down | -1,502568  | SNORD98     | Homo sapiens small nucleolar RNA, C/D box 98 (SNORD98), small nucleolar RNA [NR_003076]                                          |
| A_21_P0000393  | 0,03309451  | up   | 1,5095688  | SNORD99     | Homo sapiens small nucleolar RNA, C/D box 99 (SNORD99), small nucleolar RNA [NR_003077]                                          |
| A_23_P211985   | 6,86E-04    | up   | 1,9152808  | SNRK        | Homo sapiens SNF related kinase (SNRK), transcript variant 1, mRNA [NM_017719]                                                   |
| A_23_P159101   | 0,001891439 | up   | 1,5801884  | SNRNP35     | Homo sapiens small nuclear ribonucleoprotein 35kDa (U11/U12) (SNRNP35), transcript variant 2, mRNA [NM_022717]                   |
| A_33_P3384900  | 2,50E-05    | down | -2,457822  | SNRPD2P2    | Homo sapiens small nuclear ribonucleoprotein D2 pseudogene 2 (SNRPD2P2), non-coding RNA [NR_033826]                              |
| A_33_P3314511  | 0,006940991 | down | -2,4550972 | SNRPD3      | small nuclear ribonucleoprotein D3 polypeptide 18kDa [Source:HGNC Symbol;Acc:HGNC:11160] [ENST00000402849]                       |
| A_24_P27412    | 0,03834043  | up   | 1,5068727  | SNUPN       | Homo sapiens snurportin 1 (SNUPN), transcript variant 1, mRNA [NM_005701]                                                        |
| A_33_P3268716  | 0,009444252 | up   | 1,5913441  | SNX1        | Homo sapiens sorting nexin 1 (SNX1), transcript variant 1, mRNA [NM_003099]                                                      |
| A_33_P3289536  | 0,017850125 | up   | 1,917376   | SNX10       | Homo sapiens sorting nexin 10 (SNX10), transcript variant 1, mRNA [NM_001199835]                                                 |
| A_33_P3250128  | 1,45E-04    | down | -2,1514487 | SNX18       | Homo sapiens sorting nexin 18 (SNX18), transcript variant 2, mRNA [NM_052870]                                                    |
| A_24_P117177   | 0,01659635  | down | -1,6674821 | SNX21       | Homo sapiens sorting nexin family member 21 (SNX21), transcript variant 2, mRNA [NM_152897]                                      |
| A_23_P154585   | 0,00464523  | down | -1,5175135 | SNX21       | Homo sapiens sorting nexin family member 21 (SNX21), transcript variant 4, mRNA [NM_001042633]                                   |
| A_33_P3212172  | 0,020338247 | up   | 2,3909264  | SNX22       | Homo sapiens sorting nexin 22 (SNX22), transcript variant 1, mRNA [NM_024798]                                                    |
| A_32_P107002   | 5,98E-05    | up   | 2,1039908  | SNX29       | Homo sapiens sorting nexin 29 (SNX29), mRNA [NM_032167]                                                                          |
| A_33_P3292679  | 0,002123101 | up   | 1,5200515  | SNX6        | Homo sapiens sorting nexin 6 (SNX6), transcript variant 1, mRNA [NM_021249]                                                      |
| A_19_P00807670 | 0,0154589   | down | -1,6005719 | SOCS2-AS1   | Homo sapiens SOCS2 antisense RNA 1 (SOCS2-AS1), long non-coding RNA [NR_038263]                                                  |
| A_19_P00802794 | 0,025202228 | down | -1,9329783 | SOCS2-AS1   | Homo sapiens SOCS2 antisense RNA 1 (SOCS2-AS1), long non-coding RNA [NR_038263]                                                  |
| A_23_P207058   | 0,009831551 | up   | 1,8462876  | SOCS3       | Homo sapiens suppressor of cytokine signaling 3 (SOCS3), mRNA [NM_003955]                                                        |
| A_24_P367211   | 1,72E-04    | down | -1,9877064 | SOCS7       | Homo sapiens suppressor of cytokine signaling 7 (SOCS7), mRNA [NM_014598]                                                        |
| A_24_P307964   | 0,017352385 | up   | 2,838105   | SOHLH1      | Homo sapiens spermatogenesis and oogenesis specific basic helix-loop-helix 1 (SOHLH1), transcript variant 2, mRNA [NM_001012415] |
| A_24_P67142    | 0,037885543 | down | -1,5337447 | SON         | Homo sapiens SON DNA binding protein (SON), transcript variant b, mRNA [NM_032195]                                               |
| A_23_P402733   | 0,001443486 | up   | 1,5882757  | SON         | Homo sapiens SON DNA binding protein (SON), transcript variant b, mRNA [NM_032195]                                               |
| A_33_P3313314  | 0,00406494  | down | -2,8300092 | SORBS1      | Homo sapiens sorbin and SH3 domain containing 1 (SORBS1), transcript variant 3, mRNA [NM_001034954]                              |
| A_33_P3409625  | 0,005571186 | down | -1,5338488 | SORBS3      | Homo sapiens sorbin and SH3 domain containing 3 (SORBS3), transcript variant 1, mRNA [NM_005775]                                 |
| A_33_P3420889  | 0,026719104 | down | -1,7619413 | SORCS3      | Homo sapiens sortilin-related VPS10 domain containing receptor 3 (SORCS3), mRNA [NM_014978]                                      |
| A_33_P3407549  | 0,013960474 | down | -2,0702763 | SOWAHA      | Homo sapiens sosonodwah ankyrin repeat domain family member A (SOWAHA), mRNA [NM_175873]                                         |
| A_23_P304110   | 0,015957905 | up   | 2,4265115  | SOWAHA      | Homo sapiens sosonodwah ankyrin repeat domain family member A (SOWAHA), mRNA [NM_175873]                                         |
| A_23_P143694   | 0,010440017 | down | -2,090848  | SOX10       | Homo sapiens SRY (sex determining region Y)-box 10 (SOX10), mRNA [NM_006941]                                                     |
| A_33_P3325110  | 0,001252482 | down | -2,411466  | SOX13       | Homo sapiens SRY (sex determining region Y)-box 13 (SOX13), mRNA [NM_005686]                                                     |

|                |                  |                       |                                                                                                                                         |
|----------------|------------------|-----------------------|-----------------------------------------------------------------------------------------------------------------------------------------|
| A_23_P80662    | 0,001957604 up   | 3,1804535 SOX14       | Homo sapiens SRY (sex determining region Y)-box 14 (SOX14), mRNA [NM_004189]                                                            |
| A_23_P85218    | 0,00244925 down  | -8,071605 SOX3        | Homo sapiens SRY (sex determining region Y)-box 3 (SOX3), mRNA [NM_005634]                                                              |
| A_33_P3233916  | 0,008451398 down | -2,183581 SOX6        | Homo sapiens SRY (sex determining region Y)-box 6 (SOX6), transcript variant 1, mRNA [NM_017508]                                        |
| A_33_P3228325  | 0,009539026 up   | 1,5451137 SP100       | Homo sapiens SP100 nuclear antigen (SP100), transcript variant 1, mRNA [NM_001080391]                                                   |
| A_23_P381449   | 0,002673548 up   | 1,7262025 SP2         | Homo sapiens SP2 transcription factor (SP2), mRNA [NM_003110]                                                                           |
| A_33_P3352664  | 0,001032771 down | -2,2815936 SP7        | Homo sapiens Sp7 transcription factor (SP7), transcript variant 3, mRNA [NM_001300837]                                                  |
| A_33_P3250148  | 0,039825235 down | -1,5433004 SP8        | Homo sapiens Sp8 transcription factor (SP8), transcript variant 2, mRNA [NM_198956]                                                     |
| A_23_P30649    | 0,002535965 down | -2,330642 SPACA1      | Homo sapiens sperm acrosome associated 1 (SPACA1), mRNA [NM_030960]                                                                     |
| A_21_P0000880  | 0,022133902 down | -2,1848845 SPAG5-AS1  | Homo sapiens SPAG5 antisense RNA 1 (SPAG5-AS1), long non-coding RNA [NR_040012]                                                         |
| A_24_P365025   | 0,002424178 up   | 1,713438 SPAG9        | Homo sapiens sperm associated antigen 9 (SPAG9), transcript variant 3, mRNA [NM_003971]                                                 |
| A_33_P3377609  | 0,033370137 down | -1,9062088 SPAM1      | Homo sapiens sperm adhesion molecule 1 (PH-20 hyaluronidase, zona pellucida binding) (SPAM1), transcript variant 3, mRNA [NM_001174044] |
| A_24_P305784   | 0,014370482 up   | 2,531941 SPANXB1      | Homo sapiens SPANX family, member B1 (SPANXB1), mRNA [NM_032461]                                                                        |
| A_33_P3276653  | 0,003191604 up   | 1,7886204 SPANXN1     | Homo sapiens SPANX family, member N1 (SPANXN1), mRNA [NM_001009614]                                                                     |
| A_24_P91830    | 0,04599167 up    | 1,9761709 SPANXN3     | Homo sapiens SPANX family, member N3 (SPANXN3), mRNA [NM_001009609]                                                                     |
| A_23_P103897   | 0,01474256 down  | -1,6414444 SPATA1     | spermatogenesis associated 1 [Source:HGNC Symbol;Acc:HGNC:14682] [ENST00000431031]                                                      |
| A_33_P3298111  | 0,03585235 up    | 2,3773272 SPATA13     | spermatogenesis associated 13 [Source:HGNC Symbol;Acc:HGNC:23222] [ENST00000466831]                                                     |
| A_23_P210554   | 0,001347662 up   | 1,7344328 SPATA2      | Homo sapiens spermatogenesis associated 2 (SPATA2), transcript variant 1, mRNA [NM_006038]                                              |
| A_33_P3216438  | 0,017247561 down | -2,4187534 SPATA21    | Homo sapiens spermatogenesis associated 21 (SPATA21), mRNA [NM_198546]                                                                  |
| A_21_P0000078  | 0,03500633 up    | 2,075116 SPATA22      | Homo sapiens spermatogenesis associated 22 (SPATA22), transcript variant 1, mRNA [NM_001170699]                                         |
| A_21_P0002142  | 0,002831261 down | -2,7909002 SPATA3-AS1 | SPATA3 antisense RNA 1 (head to head) [Source:HGNC Symbol;Acc:HGNC:28013] [ENST00000426904]                                             |
| A_21_P0013668  | 0,011819395 down | -1,6053566 SPATA31C2  | Homo sapiens SPATA31 subfamily C, member 2 (SPATA31C2), mRNA [NM_001166137]                                                             |
| A_32_P70056    | 0,017306114 up   | 1,6965684 SPATA42     | Homo sapiens spermatogenesis associated 42 (non-protein coding) (SPATA42), transcript variant 2, long non-coding RNA [NR_049777]        |
| A_33_P3321919  | 8,86E-05 up      | 2,7889643 SPATA45     | Homo sapiens spermatogenesis associated 45 (SPATA45), mRNA [NM_001024601]                                                               |
| A_33_P3268224  | 0,035701726 up   | 2,0021043 SPATA5      | Homo sapiens spermatogenesis associated 5 (SPATA5), mRNA [NM_145207]                                                                    |
| A_24_P922252   | 0,007018658 up   | 2,316299 SPATA5L1     | Homo sapiens cDNA FLJ12286 fis, clone MAMMA1001768, weakly similar to CELL DIVISION CYCLE PROTEIN 48 HOMOLOG MJ1156. [AK022348]         |
| A_33_P3254073  | 0,042611912 down | -1,9304503 SPATA6L    | spermatogenesis associated 6-like [Source:HGNC Symbol;Acc:HGNC:25472] [ENST00000471669]                                                 |
| A_32_P102935   | 0,037747014 up   | 1,6198094 SPDYA       | Homo sapiens speedy/RINGO cell cycle regulator family member A (SPDYA), transcript variant 2, mRNA [NM_001008779]                       |
| A_33_P3322945  | 0,010294055 down | -1,5167365 SPDYC      | Homo sapiens speedy/RINGO cell cycle regulator family member C (SPDYC), mRNA [NM_001008778]                                             |
| A_23_P425967   | 0,01187239 down  | -2,5839787 SPDYE1     | Homo sapiens speedy/RINGO cell cycle regulator family member E1 (SPDYE1), mRNA [NM_175064]                                              |
| A_24_P255986   | 0,009197988 down | -2,3075967 SPDYE4     | Homo sapiens speedy/RINGO cell cycle regulator family member E4 (SPDYE4), mRNA [NM_001128076]                                           |
| A_32_P202182   | 0,03537796 up    | 1,782816 SPDYE8P      | Homo sapiens speedy/RINGO cell cycle regulator family member E8, pseudogene (SPDYE8P), non-coding RNA [NR_003664]                       |
| A_23_P12053    | 1,11E-05 up      | 2,0489528 SPEN        | Homo sapiens spen family transcriptional repressor (SPEN), mRNA [NM_015001]                                                             |
| A_19_P00806499 | 1,19E-05 down    | -4,1503005 SPG20-AS1  | Homo sapiens SPG20 antisense RNA 1 (SPG20-AS1), transcript variant 1, long non-coding RNA [NR_045180]                                   |
| A_21_P0008998  | 0,04221182 up    | 1,5715525 SPG7        | spastic paraplegia 7 (pure and complicated autosomal recessive) [Source:HGNC Symbol;Acc:HGNC:11237] [ENST00000568509]                   |
| A_21_P0009117  | 0,008526453 up   | 1,7833046 SPG7        | spastic paraplegia 7 (pure and complicated autosomal recessive) [Source:HGNC Symbol;Acc:HGNC:11237] [ENST00000568509]                   |
| A_24_P5305     | 0,019773852 up   | 1,5983998 SPG7        | Homo sapiens spastic paraplegia 7 (pure and complicated autosomal recessive) (SPG7), transcript variant 1, mRNA [NM_003119]             |
| A_23_P433990   | 0,026564928 up   | 1,6278061 SPG7        | Homo sapiens spastic paraplegia 7 (pure and complicated autosomal recessive) (SPG7), transcript variant 1, mRNA [NM_003119]             |
| A_33_P3489646  | 0,03594257 down  | -1,6157703 SPI1       | Homo sapiens Spi-1 proto-oncogene (SPI1), transcript variant 1, mRNA [NM_001080547]                                                     |
| A_33_P3388006  | 0,030238435 up   | 1,5969714 SPICE1      | Homo sapiens spindle and centriole associated protein 1 (SPICE1), mRNA [NM_144718]                                                      |
| A_21_P0014029  | 0,026568804 down | -1,6992115 SPIDR      | scaffolding protein involved in DNA repair [Source:HGNC Symbol;Acc:HGNC:28971] [ENST00000521798]                                        |
| A_24_P143686   | 0,001476954 up   | 1,5441651 SPIDR       | Homo sapiens scaffolding protein involved in DNA repair (SPIDR), transcript variant 1, mRNA [NM_001080394]                              |
| A_24_P494454   | 0,011750751 up   | 1,6786367 SPIN3       | Homo sapiens spindlin family, member 3 (SPIN3), transcript variant 1, mRNA [NM_001010862]                                               |
| A_33_P3381836  | 0,006196491 down | -2,4531546 SPINK14    | Homo sapiens serine peptidase inhibitor, Kazal type 14 (putative) (SPINK14), mRNA [NM_001001325]                                        |
| A_23_P155688   | 0,012787063 up   | 1,5551062 SPINK2      | Homo sapiens serine peptidase inhibitor, Kazal type 2 (acrosin-trypsin inhibitor) (SPINK2), transcript variant 2, mRNA [NM_021114]      |
| A_33_P3424302  | 0,045472402 up   | 1,5086557 SPINT4      | Homo sapiens serine peptidase inhibitor, Kunitz type 4 (SPINT4), mRNA [NM_178455]                                                       |
| A_33_P3300172  | 1,13E-04 down    | -2,9129062 SPON2      | Homo sapiens cDNA FLJ42615 fis, clone BRACE3014231. [AK124606]                                                                          |
| A_24_P107859   | 0,010338904 up   | 1,7688456 SPRED1      | Homo sapiens sprouty-related, EVH1 domain containing 1 (SPRED1), mRNA [NM_152594]                                                       |
| A_32_P225854   | 0,001193612 up   | 1,5619863 SPRED2      | Homo sapiens sprouty-related, EVH1 domain containing 2 (SPRED2), transcript variant 1, mRNA [NM_181784]                                 |
| A_33_P3401981  | 0,001867043 up   | 2,9933386 SPRED3      | Homo sapiens sprouty-related, EVH1 domain containing 3 (SPRED3), transcript variant 1, mRNA [NM_001042522]                              |
| A_24_P576506   | 0,004625077 down | -2,2741063 SPRN       | Homo sapiens shadow of prion protein homolog (zebrafish) (SPRN), mRNA [NM_001012508]                                                    |
| A_23_P144476   | 0,010696892 up   | 1,925552 SPRY1        | Homo sapiens sprouty homolog 1, antagonist of FGF signaling (Drosophila) (SPRY1), transcript variant 2, mRNA [NM_199327]                |
| A_24_P204819   | 0,025078906 down | -1,796512 SPRY3       | Homo sapiens sprouty homolog 3 (Drosophila) (SPRY3), mRNA [NM_005840]                                                                   |
| A_33_P3338423  | 0,026434213 down | -1,721988 SPRY4       | Homo sapiens sprouty homolog 4 (Drosophila) (SPRY4), transcript variant 3, mRNA [NM_001293289]                                          |
| A_23_P368718   | 0,014416411 up   | 1,5694852 SPRYD7      | SPRY domain containing 7 [Source:HGNC Symbol;Acc:HGNC:14297] [ENST00000613924]                                                          |
| A_24_P96961    | 0,01789821 up    | 1,5177591 SPSB1       | Homo sapiens splA/ryanodine receptor domain and SOCS box containing 1 (SPSB1), mRNA [NM_025106]                                         |
| A_23_P258381   | 0,01269423 down  | -2,1155863 SPSB4      | splA/ryanodine receptor domain and SOCS box containing 4 [Source:HGNC Symbol;Acc:HGNC:30630] [ENST00000508126]                          |
| A_23_P20832    | 0,014934784 up   | 1,6108845 SPTAN1      | Homo sapiens spectrin, alpha, erythrocytic 1 (SPTAN1), transcript variant 2, mRNA [NM_003127]                                           |
| A_23_P65506    | 0,044793073 down | -1,6646454 SPTB       | Homo sapiens spectrin, beta, erythrocytic (SPTB), transcript variant 2, mRNA [NM_000347]                                                |
| A_24_P293114   | 0,020756127 down | -1,735082 SPTBN4      | Homo sapiens spectrin, beta, non-erythrocytic 4 (SPTBN4), transcript variant sigma1, mRNA [NM_020971]                                   |
| A_22_P150486   | 4,15E-04 up      | 1,756872 SPTLC2       | Homo sapiens serine palmitoyltransferase, long chain base subunit 2 (SPTLC2), mRNA [NM_004863]                                          |
| A_33_P3305617  | 0,001885898 down | -2,1076288 SPTSSB     | serine palmitoyltransferase, small subunit B [Source:HGNC Symbol;Acc:HGNC:24045] [ENST00000617024]                                      |

|                |                  |                       |                                                                                                                                                                                |
|----------------|------------------|-----------------------|--------------------------------------------------------------------------------------------------------------------------------------------------------------------------------|
| A_23_P308603   | 4,99E-04 up      | 2,3055863 SRC         | Homo sapiens SRC proto-oncogene, non-receptor tyrosine kinase (SRC), transcript variant 1, mRNA [NM_005417]                                                                    |
| A_24_P944991   | 0,012150929 down | -1,52653 SREK1IP1     | Homo sapiens SREK1-interacting protein 1 (SREK1IP1), mRNA [NM_173829]                                                                                                          |
| A_24_P337657   | 0,017482813 up   | 2,1334105 SRF         | Homo sapiens serum response factor (c-fos serum response element-binding transcription factor) (SRF), transcript variant 1, mRNA [NM_003131]                                   |
| A_33_P3213772  | 0,016628768 up   | 1,553939 SRGAP2       | Homo sapiens SLIT-ROBO Rho GTPase activating protein 2 (SRGAP2), transcript variant 4, mRNA [NM_001300952]                                                                     |
| A_33_P3368540  | 4,37E-05 down    | -2,333685 SRGAP3      | SLIT-ROBO Rho GTPase activating protein 3 [Source:HGNC Symbol;Acc:HGNC:19744] [ENST00000490889]                                                                                |
| A_23_P358410   | 0,005668055 up   | 2,4407232 SRGAP3      | Homo sapiens SLIT-ROBO Rho GTPase activating protein 3 (SRGAP3), transcript variant 1, mRNA [NM_014850]                                                                        |
| A_33_P3236798  | 0,037908956 down | -2,0868375 SRMS       | Homo sapiens src-related kinase lacking C-terminal regulatory tyrosine and N-terminal myristylation sites (SRMS), mRNA [NM_080823]                                             |
| A_21_P0000895  | 0,020874841 up   | 1,5700223 SRP14-AS1   | Homo sapiens SRP14 antisense RNA1 (head to head) (SRP14-AS1), transcript variant 4, long non-coding RNA [NR_040062]                                                            |
| A_23_P162945   | 0,019539094 up   | 1,5316727 SRP54       | Homo sapiens signal recognition particle 54kDa (SRP54), transcript variant 1, mRNA [NM_003136]                                                                                 |
| A_24_P111131   | 7,43E-05 up      | 1,8887756 SRRM1       | Homo sapiens serine/arginine repetitive matrix 1 (SRRM1), transcript variant 2, mRNA [NM_005839]                                                                               |
| A_33_P3324755  | 2,47E-04 down    | -2,760445 SRRM2-AS1   | Homo sapiens SRRM2 antisense RNA 1 (SRRM2-AS1), transcript variant 1, long non-coding RNA [NR_027274]                                                                          |
| A_23_P42768    | 0,013918295 down | -1,765268 SRRM3       | Homo sapiens serine/arginine repetitive matrix 3 (SRRM3), transcript variant 2, mRNA [NM_001110199]                                                                            |
| A_23_P331700   | 0,008796485 up   | 2,2135015 SRRM3       | Homo sapiens serine/arginine repetitive matrix 3 (SRRM3), transcript variant 1, mRNA [NM_001291831]                                                                            |
| A_23_P111481   | 0,001834746 up   | 1,6834066 SRRT        | Homo sapiens serrate, RNA effector molecule (SRRT), transcript variant 1, mRNA [NM_015908]                                                                                     |
| A_23_P111487   | 0,003303443 up   | 1,6821806 SRRT        | Homo sapiens serrate, RNA effector molecule (SRRT), transcript variant 4, mRNA [NM_00128853]                                                                                   |
| A_23_P352291   | 0,017436704 up   | 1,5974357 SRSF10      | Homo sapiens serine/arginine-rich splicing factor 10 (SRSF10), transcript variant 2, mRNA [NM_054016]                                                                          |
| A_23_P77776    | 9,89E-05 up      | 1,989498 SRSF2        | Homo sapiens serine/arginine-rich splicing factor 2 (SRSF2), transcript variant 1, mRNA [NM_003016]                                                                            |
| A_23_P423926   | 0,001521755 up   | 1,9072506 SS18L1      | Homo sapiens synovial sarcoma translocation gene on chromosome 18-like 1 (SS18L1), transcript variant 1, mRNA [NM_198935]                                                      |
| A_33_P3393931  | 0,02454142 down  | -2,4707692 SSBP3-AS1  | Homo sapiens SSBP3 antisense RNA 1 (SSBP3-AS1), long non-coding RNA [NR_103541]                                                                                                |
| A_21_P0000127  | 0,027079117 up   | 2,2916749 SSC5D       | Homo sapiens scavenger receptor cysteine rich family, 5 domains (SSC5D), transcript variant 2, mRNA [NM_001195267]                                                             |
| A_23_P102060   | 0,041046876 up   | 1,5175989 SSFA2       | Homo sapiens sperm specific antigen 2 (SSFA2), transcript variant 2, mRNA [NM_006751]                                                                                          |
| A_24_P332647   | 0,009371382 up   | 1,7682351 SSH1        | Homo sapiens slingshot protein phosphatase 1 (SSH1), transcript variant 3, mRNA [NM_001161331]                                                                                 |
| A_33_P3367917  | 0,004884202 up   | 1,7391522 SSH2        | Homo sapiens slingshot protein phosphatase 2 (SSH2), transcript variant 3, mRNA [NM_001282130]                                                                                 |
| A_33_P3363168  | 0,005870757 up   | 1,5802524 SSH2        | Homo sapiens slingshot protein phosphatase 2 (SSH2), transcript variant 1, mRNA [NM_001282129]                                                                                 |
| A_33_P3277183  | 0,035661407 up   | 2,0261858 SSPO        | SCO-spondin [Source:HGNC Symbol;Acc:HGNC:21998] [ENST00000475488]                                                                                                              |
| A_33_P3352467  | 0,009910471 up   | 2,726636 SSTR2        | Homo sapiens somatostatin receptor 2 (SSTR2), mRNA [NM_001050]                                                                                                                 |
| A_23_P68910    | 0,04933239 down  | -1,5359924 SSTR3      | Homo sapiens somatostatin receptor 3 (SSTR3), transcript variant 1, mRNA [NM_001051]                                                                                           |
| A_33_P3414267  | 1,78E-04 down    | -3,9464931 SSTR4      | Homo sapiens somatostatin receptor 4 (SSTR4), mRNA [NM_001052]                                                                                                                 |
| A_23_P77545    | 0,018193105 down | -1,9678162 SSTR5      | Homo sapiens somatostatin receptor 5 (SSTR5), transcript variant 1, mRNA [NM_001053]                                                                                           |
| A_24_P256243   | 0,00131506 down  | -1,9598496 SSX2       | Homo sapiens synovial sarcoma, X breakpoint 2 (SSX2), transcript variant 2, mRNA [NM_175698]                                                                                   |
| A_23_P252023   | 4,87E-04 up      | 3,698383 SSX2         | Homo sapiens synovial sarcoma, X breakpoint 2 (SSX2), transcript variant 2, mRNA [NM_175698]                                                                                   |
| A_23_P31858    | 0,013593148 down | -2,1409123 ST18       | Homo sapiens suppression of tumorigenicity 18, zinc finger (ST18), mRNA [NM_014682]                                                                                            |
| A_24_P268123   | 0,009517816 up   | 1,6738088 ST3GAL3     | Homo sapiens ST3 beta-galactoside alpha-2,3-sialyltransferase 3 (ST3GAL3), transcript variant 1, mRNA [NM_174963]                                                              |
| A_33_P3405966  | 1,20E-04 up      | 2,5471005 ST3GAL3     | Homo sapiens ST3 beta-galactoside alpha-2,3-sialyltransferase 3 (ST3GAL3), transcript variant 1, mRNA [NM_174963]                                                              |
| A_23_P250800   | 0,037591886 up   | 1,5630652 ST3GAL6     | Homo sapiens ST3 beta-galactoside alpha-2,3-sialyltransferase 6 (ST3GAL6), transcript variant 1, mRNA [NM_006100]                                                              |
| A_24_P388528   | 0,001458094 up   | 1,7945207 ST6GAL1     | Homo sapiens ST6 beta-galactosamide alpha-2,6-sialyltransferase 1 (ST6GAL1), transcript variant 1, mRNA [NM_173216]                                                            |
| A_23_P94736    | 0,003538807 down | -1,5662678 ST6GALNAC4 | Homo sapiens ST6 (alpha-N-acetylneuraminyl-2,3-beta-galactosyl-1,3)-N-acetylgalactosaminide alpha-2,6-sialyltransferase 4 (ST6GALNAC4), transcript variant 1, mRNA [NM_175039] |
| A_23_P33093    | 0,04625036 down  | -1,8184602 ST6GALNAC5 | Homo sapiens ST6 (alpha-N-acetylneuraminyl-2,3-beta-galactosyl-1,3)-N-acetylgalactosaminide alpha-2,6-sialyltransferase 5 (ST6GALNAC5), mRNA [NM_030965]                       |
| A_33_P3380751  | 0,001412595 down | -1,6573055 ST8SIA1    | Homo sapiens ST8 alpha-N-acetylneuraminide alpha-2,8-sialyltransferase 1 (ST8SIA1), mRNA [NM_003034]                                                                           |
| A_33_P3291484  | 0,044667147 up   | 1,5696695 ST8SIA4     | Homo sapiens ST8 alpha-N-acetylneuraminide alpha-2,8-sialyltransferase 4 (ST8SIA4), transcript variant 1, mRNA [NM_005668]                                                     |
| A_23_P162607   | 0,004162413 down | -2,983613 STAB2       | Homo sapiens stabilin 2 (STAB2), mRNA [NM_017564]                                                                                                                              |
| A_32_P152195   | 0,016831234 down | -1,7888857 STAC2      | Homo sapiens SH3 and cysteine rich domain 2 (STAC2), mRNA [NM_198993]                                                                                                          |
| A_33_P3220663  | 0,002778671 up   | 1,6144528 STAC3       | Homo sapiens SH3 and cysteine rich domain 3 (STAC3), transcript variant 1, mRNA [NM_145064]                                                                                    |
| A_33_P3304304  | 3,21E-04 up      | 2,5917065 STAG2       | stromal antigen 2 [Source:HGNC Symbol;Acc:HGNC:11355] [ENST00000394478]                                                                                                        |
| A_24_P374962   | 0,00277838 up    | 1,5480841 STAG3L2     | Homo sapiens stromal antigen 3-like 2 (pseudogene) (STAG3L2), non-coding RNA [NR_040584]                                                                                       |
| A_21_P0011319  | 0,008284524 down | -2,4625785 STARD9     | Homo sapiens SIAR-related lipid transfer (START) domain containing 9 (STARD9), mRNA [NM_020759]                                                                                |
| A_21_P0011322  | 0,03867572 up    | 1,9692532 STARD9      | Homo sapiens SIAR-related lipid transfer (START) domain containing 9 (STARD9), mRNA [NM_020759]                                                                                |
| A_23_P100795   | 0,003314072 up   | 1,6543717 STAT3       | Homo sapiens signal transducer and activator of transcription 3 (acute-phase response factor) (STAT3), transcript variant 3, mRNA [NM_213662]                                  |
| A_24_P1116805  | 0,019763608 up   | 1,5172842 STAT3       | Homo sapiens signal transducer and activator of transcription 3 (acute-phase response factor) (STAT3), transcript variant 3, mRNA [NM_213662]                                  |
| A_23_P207367   | 0,022036076 up   | 1,5080404 STAT5A      | Homo sapiens signal transducer and activator of transcription 5A (STAT5A), transcript variant 2, mRNA [NM_003152]                                                              |
| A_33_P3380867  | 7,87E-04 up      | 1,6934508 STAT5B      | Homo sapiens signal transducer and activator of transcription 5B (STAT5B), mRNA [NM_012448]                                                                                    |
| A_33_P3265783  | 0,009251297 up   | 2,3780766 STATH       | Homo sapiens statherin (STATH), transcript variant 1, mRNA [NM_003154]                                                                                                         |
| A_33_P3371650  | 0,001019261 up   | 2,8847733 STK17B      | Homo sapiens serine/threonine kinase 17b (apoptosis-inducing), mRNA (cDNA clone IMAGE:6280720), partial cds. [BC052561]                                                        |
| A_23_P253177   | 0,0302884 up     | 1,692294 STK24        | Homo sapiens serine/threonine kinase 24 (STK24), transcript variant 2, mRNA [NM_001032296]                                                                                     |
| A_21_P0000774  | 0,003525023 down | -2,1243298 STK4-AS1   | Homo sapiens STK4 antisense RNA 1 (head to head) (STK4-AS1), long non-coding RNA [NR_038341]                                                                                   |
| A_33_P3632866  | 0,024707682 down | -1,7073007 STKLD1     | Homo sapiens serine/threonine kinase-like domain containing 1 (STKLD1), transcript variant 1, mRNA [NM_153710]                                                                 |
| A_19_P00320974 | 0,008538269 down | -2,3183875 STMN1      | Homo sapiens stathmin 1 (STMN1), transcript variant 4, mRNA [NM_001145454]                                                                                                     |
| A_21_P0013125  | 0,04575318 up    | 1,8549829 STMND1      | Homo sapiens stathmin domain containing 1 (STMND1), mRNA [NM_001190766]                                                                                                        |
| A_23_P302005   | 0,03479545 up    | 1,9865717 STON1       | Homo sapiens stonin 1 (STON1), transcript variant 2, mRNA [NM_006873]                                                                                                          |
| A_33_P3307495  | 0,010076329 up   | 4,406939 STRA6        | Homo sapiens stimulated by retinoic acid 6 (STRA6), transcript variant 8, mRNA [NM_001199042]                                                                                  |
| A_21_P0011374  | 0,01429278 down  | -1,5925373 STRC       | Homo sapiens stereocilin (STRC), mRNA [NM_153700]                                                                                                                              |

|                |             |      |            |           |                                                                                                                                    |
|----------------|-------------|------|------------|-----------|------------------------------------------------------------------------------------------------------------------------------------|
| A_33_P3270519  | 0,024414364 | down | -1,5304848 | STRIP1    | Homo sapiens striatin interacting protein 1 (STRIP1), transcript variant 1, mRNA [NM_033088]                                       |
| A_19_P00316199 | 0,001771349 | up   | 1,7783793  | STRN      | Homo sapiens striatin, calmodulin binding protein (STRN), mRNA [NM_003162]                                                         |
| A_19_P00316200 | 0,001438353 | up   | 1,6647763  | STRN      | Homo sapiens striatin, calmodulin binding protein (STRN), mRNA [NM_003162]                                                         |
| A_23_P392076   | 0,003681422 | up   | 1,5448192  | STRN3     | Homo sapiens striatin, calmodulin binding protein 3 (STRN3), transcript variant 2, mRNA [NM_014574]                                |
| A_23_P168556   | 0,017168421 | up   | 1,9830005  | STX1A     | Homo sapiens syntaxin 1A (brain) (STX1A), transcript variant 1, mRNA [NM_004603]                                                   |
| A_33_P3326382  | 0,003554973 | down | -2,5165343 | STX1B     | syntaxin 1B [Source:HGNC Symbol;Acc:HGNC:18539] [ENST00000215095]                                                                  |
| A_23_P256375   | 0,00254102  | up   | 1,5247668  | STX4      | Homo sapiens syntaxin 4 (STX4), transcript variant 3, mRNA [NM_004604]                                                             |
| A_23_P375566   | 0,006420092 | down | -1,6829679 | STXBP4    | Homo sapiens syntaxin binding protein 4 (STXBP4), mRNA [NM_178509]                                                                 |
| A_32_P95462    | 0,002737095 | down | -2,1880145 | STXBP5L   | Homo sapiens syntaxin binding protein 5-like (STXBP5L), mRNA [NM_014980]                                                           |
| A_23_P205713   | 6,08E-04    | down | -2,1435587 | STXBP6    | Homo sapiens syntaxin binding protein 6 (amisyn) (STXBP6), mRNA [NM_014178]                                                        |
| A_24_P10214    | 0,020628765 | up   | 1,7991759  | STXBP6    | Homo sapiens syntaxin binding protein 6 (amisyn) (STXBP6), mRNA [NM_014178]                                                        |
| A_21_P0000093  | 0,04029708  | down | -1,5888788 | SUCLG2    | Homo sapiens succinate-CoA ligase, GDP-forming, beta subunit (SUCLG2), transcript variant 1, mRNA [NM_001177599]                   |
| A_24_P149902   | 0,02631148  | down | -1,702542  | SUFU      | Homo sapiens suppressor of fused homolog (Drosophila) (SUFU), transcript variant 1, mRNA [NM_016169]                               |
| A_23_P425304   | 0,01276979  | up   | 1,5624954  | SUFU      | Homo sapiens suppressor of fused homolog (Drosophila) (SUFU), transcript variant 1, mRNA [NM_016169]                               |
| A_23_P145711   | 0,03995122  | down | -2,1568646 | SUGCT     | Homo sapiens succinyl-CoA:glutarate-CoA transferase (SUGCT), transcript variant 4, mRNA [NM_024728]                                |
| A_23_P16562    | 0,004525502 | up   | 1,9305263  | SUGP2     | Homo sapiens SURP and G patch domain containing 2 (SUGP2), transcript variant 1, mRNA [NM_001017392]                               |
| A_23_P106773   | 0,039838556 | down | -1,576894  | SULT1A2   | Homo sapiens sulfotransferase family, cytosolic, 1A, phenol-preferring, member 2 (SULT1A2), transcript variant 2, mRNA [NM_177528] |
| A_23_P51002    | 0,007016542 | up   | 2,4616885  | SULT1C2   | Homo sapiens sulfotransferase family, cytosolic, 1C, member 2 (SULT1C2), transcript variant 2, mRNA [NM_176825]                    |
| A_33_P3391220  | 0,016811999 | down | -2,0781744 | SULT1C2P1 | Homo sapiens sulfotransferase family, cytosolic, 1C, member 2 pseudogene 1 (SULT1C2P1), non-coding RNA [NR_037191]                 |
| A_33_P3315564  | 0,004130895 | up   | 3,4209287  | SULT1C3   | Homo sapiens sulfotransferase family, cytosolic, 1C, member 3 (SULT1C3), mRNA [NM_001008743]                                       |
| A_23_P147070   | 0,006057499 | up   | 1,9089094  | SUN1      | Sad1 and UNC84 domain containing 1 [Source:HGNC Symbol;Acc:HGNC:18587] [ENST00000340926]                                           |
| A_23_P109229   | 0,032642856 | down | -2,6387162 | SUN5      | Homo sapiens Sad1 and UNC84 domain containing 5 (SUN5), mRNA [NM_080675]                                                           |
| A_23_P140050   | 5,35E-04    | down | -2,064423  | SUPT20H   | Homo sapiens suppressor of Ty 20 homolog (S. cerevisiae) (SUPT20H), transcript variant 2, mRNA [NM_017569]                         |
| A_33_P3384284  | 2,26E-04    | down | -2,7224739 | SUPT20HL1 | Homo sapiens suppressor of Ty 20 homolog (S. cerevisiae)-like 1 (SUPT20HL1), mRNA [NM_001136234]                                   |
| A_33_P3347152  | 0,002022004 | down | -1,9127482 | SUPT3H    | suppressor of Ty 3 homolog (S. cerevisiae) [Source:HGNC Symbol;Acc:HGNC:11466] [ENST00000371458]                                   |
| A_23_P210091   | 2,51E-04    | up   | 1,6553069  | SUPT7L    | Homo sapiens suppressor of Ty 7 (S. cerevisiae)-like (SUPT7L), transcript variant 1, mRNA [NM_014860]                              |
| A_33_P3394793  | 0,019623002 | up   | 2,6560774  | SUSD2     | Homo sapiens sushi domain containing 2 (SUSD2), mRNA [NM_019601]                                                                   |
| A_33_P3327663  | 2,38E-05    | down | -3,057104  | SUSD4     | sushi domain containing 4 [Source:HGNC Symbol;Acc:HGNC:25470] [ENST00000342943]                                                    |
| A_33_P3327657  | 0,001848582 | up   | 2,1881092  | SUSD4     | sushi domain containing 4 [Source:HGNC Symbol;Acc:HGNC:25470] [ENST00000342943]                                                    |
| A_24_P259607   | 0,030329175 | up   | 1,7629316  | SUSD4     | Homo sapiens sushi domain containing 4 (SUSD4), transcript variant 1, mRNA [NM_017982]                                             |
| A_24_P238131   | 0,009549734 | up   | 1,8852487  | SUSD5     | Homo sapiens sushi domain containing 5 (SUSD5), mRNA [NM_015551]                                                                   |
| A_23_P371787   | 0,002571608 | up   | 1,7613299  | SUSD6     | Homo sapiens sushi domain containing 6 (SUSD6), mRNA [NM_014734]                                                                   |
| A_23_P23728    | 0,023567552 | down | -1,5253055 | SV2A      | Homo sapiens synaptic vesicle glycoprotein 2A (SV2A), transcript variant 1, mRNA [NM_014849]                                       |
| A_23_P35349    | 6,29E-05    | up   | 2,0897424  | SVIL      | Homo sapiens supervillin (SVIL), transcript variant 2, mRNA [NM_021738]                                                            |
| A_33_P3303464  | 0,004717279 | down | -1,7188963 | SWSAP1    | Homo sapiens SWIM-type zinc finger 7 associated protein 1 (SWSAP1), mRNA [NM_175871]                                               |
| A_23_P115805   | 0,017703062 | up   | 2,1787155  | SYCE1     | Homo sapiens synaptonemal complex central element protein 1 (SYCE1), transcript variant 4, mRNA [NM_001143764]                     |
| A_33_P3314673  | 0,009080916 | down | -2,198776  | SYCE1L    | Homo sapiens synaptonemal complex central element protein 1-like (SYCE1L), mRNA [NM_001129979]                                     |
| A_23_P210675   | 5,19E-04    | up   | 2,709709   | SYCP2     | Homo sapiens synaptonemal complex protein 2 (SYCP2), mRNA [NM_014258]                                                              |
| A_23_P33847    | 2,17E-05    | down | -4,2669168 | SYN1      | Homo sapiens synapsin I (SYN1), transcript variant Ia, mRNA [NM_006950]                                                            |
| A_33_P3317613  | 0,049271774 | down | -1,8612275 | SYN2      | Homo sapiens synapsin II (SYN2), transcript variant IIa, mRNA [NM_133625]                                                          |
| A_23_P500861   | 0,021121373 | down | -2,161066  | SYNE1     | Homo sapiens spectrin repeat containing, nuclear envelope 1 (SYNE1), transcript variant 1, mRNA [NM_182961]                        |
| A_33_P3335920  | 2,87E-05    | down | -3,542771  | SYNE1     | Homo sapiens spectrin repeat containing, nuclear envelope 1 (SYNE1), transcript variant 1, mRNA [NM_182961]                        |
| A_21_P0014520  | 6,70E-06    | down | -4,0381513 | SYNE1-AS1 | Homo sapiens SYNE1 antisense RNA 1 (SYNE1-AS1), long non-coding RNA [NR_120501]                                                    |
| A_33_P3210278  | 0,007956684 | up   | 1,5031699  | SYNE2     | Homo sapiens spectrin repeat containing, nuclear envelope 2 (SYNE2), transcript variant 5, mRNA [NM_182914]                        |
| A_33_P3324839  | 0,019012272 | down | -1,5145072 | SYNGAP1   | Homo sapiens synaptic Ras GTPase activating protein 1 (SYNGAP1), mRNA [NM_006772]                                                  |
| A_23_P164927   | 2,03E-05    | down | -3,6661375 | SYNGR4    | Homo sapiens synaptogyrin 4 (SYNGR4), mRNA [NM_012451]                                                                             |
| A_33_P3354990  | 0,007211428 | down | -1,5309813 | SYNJ2     | synaptotagmin 2 [Source:HGNC Symbol;Acc:HGNC:11504] [ENST00000449320]                                                              |
| A_23_P80718    | 0,002882583 | up   | 1,5769912  | SYNPR     | Homo sapiens synaptoporin (SYNPR), transcript variant 2, mRNA [NM_144642]                                                          |
| A_33_P3307486  | 0,00723893  | down | -1,5220464 | SYNRG     | Homo sapiens synergin, gamma (SYNRG), transcript variant 7, mRNA [NM_001163547]                                                    |
| A_21_P0000004  | 0,011233006 | up   | 1,5811169  | SYS1      | Homo sapiens Sys1 golgi trafficking protein (SYS1), transcript variant 2, mRNA [NM_001099791]                                      |
| A_33_P3340525  | 0,008706681 | up   | 1,5677933  | SYT10     | Homo sapiens synaptotagmin X (SYT10), mRNA [NM_198992]                                                                             |
| A_33_P3353979  | 0,001603556 | down | -2,3321605 | SYT15     | Homo sapiens synaptotagmin XV (SYT15), transcript variant b, mRNA [NM_181519]                                                      |
| A_23_P163697   | 0,027520424 | up   | 1,7787806  | SYT17     | Homo sapiens synaptotagmin XVII (SYT17), mRNA [NM_016524]                                                                          |
| A_23_P55917    | 1,05E-05    | down | -5,1080933 | SYT3      | Homo sapiens synaptotagmin III (SYT3), transcript variant 1, mRNA [NM_032298]                                                      |
| A_33_P3235322  | 0,001129445 | down | -1,776362  | SYTL1     | Homo sapiens synaptotagmin-like 1 (SYTL1), transcript variant 2, mRNA [NM_032872]                                                  |
| A_23_P53193    | 0,03945926  | up   | 1,7809179  | SYTL2     | Homo sapiens synaptotagmin-like 2 (SYTL2), transcript variant a, mRNA [NM_032943]                                                  |
| A_33_P3266730  | 0,047673915 | down | -1,8205093 | SYTL4     | Homo sapiens synaptotagmin-like 4 (SYTL4), transcript variant 1, mRNA [NM_080737]                                                  |
| A_33_P3373134  | 0,039410558 | down | -1,6901146 | SZT2      | Homo sapiens seizure threshold 2 homolog (mouse) (SZT2), mRNA [NM_015284]                                                          |
| A_33_P3373139  | 0,01874433  | up   | 1,5288887  | SZT2      | seizure threshold 2 homolog (mouse) [Source:HGNC Symbol;Acc:HGNC:29040] [ENST00000470139]                                          |
| A_23_P70733    | 0,0179462   | down | -3,5213706 | TAAR2     | Homo sapiens trace amine associated receptor 2 (TAAR2), transcript variant 1, mRNA [NM_001033080]                                  |
| A_23_P255968   | 2,39E-04    | down | -3,118682  | TAAR5     | Homo sapiens trace amine associated receptor 5 (TAAR5), mRNA [NM_003967]                                                           |

|               |                  |                            |                                                                                                                                                         |
|---------------|------------------|----------------------------|---------------------------------------------------------------------------------------------------------------------------------------------------------|
| A_23_P168266  | 0,003970861 up   | 2,0324726 TAAR9            | Homo sapiens trace amine associated receptor 9 (gene/pseudogene) (TAAR9), mRNA [NM_175057]                                                              |
| A_32_P162150  | 0,021909224 up   | 1,575039 TAB3              | Homo sapiens TGF-beta activated kinase 1/MAP3K7 binding protein 3 (TAB3), mRNA [NM_152787]                                                              |
| A_33_P3258046 | 0,009542847 down | -2,2829373 TAC4            | Homo sapiens tachykinin 4 (hemokinin) (TAC4), transcript variant alpha, mRNA [NM_170685]                                                                |
| A_33_P3253877 | 0,03504794 up    | 1,7756906 TACC1            | transforming, acidic coiled-coil containing protein 1 [Source:HGNC Symbol;Acc:HGNC:11522] [ENST00000518415]                                             |
| A_24_P98249   | 0,00174088 up    | 1,5538617 TACC1            | Homo sapiens transforming, acidic coiled-coil containing protein 1 (TACC1), transcript variant 1, mRNA [NM_006283]                                      |
| A_23_P35148   | 0,004193523 down | -1,6253346 TAF13           | Homo sapiens TAF13 RNA polymerase II, TATA box binding protein (TBP)-associated factor, 18kDa (TAF13), mRNA [NM_005645]                                 |
| A_33_P3257457 | 0,016303074 down | -1,616389 TAF1L            | Homo sapiens TAF1 RNA polymerase II, TATA box binding protein (TBP)-associated factor, 210kDa-like (TAF1L), mRNA [NM_153809]                            |
| A_23_P80062   | 7,72E-05 up      | 2,0873044 TAF4             | Homo sapiens TAF4 RNA polymerase II, TATA box binding protein (TBP)-associated factor, 135kDa (TAF4), mRNA [NM_003185]                                  |
| A_33_P3242323 | 0,038226143 down | -1,8742262 TAF5L           | TAF5-like RNA polymerase II, p300/CBP-associated factor (PCAF)-associated factor, 65kDa [Source:HGNC Symbol;Acc:HGNC:17304] [ENST00000366674]           |
| A_24_P376441  | 0,004624005 up   | 1,756564 TAF5L             | Homo sapiens TAF5-like RNA polymerase II, p300/CBP-associated factor (PCAF)-associated factor, 65kDa (TAF5L), transcript variant 2, mRNA [NM_001025247] |
| A_23_P35309   | 0,002954134 up   | 1,7182579 TAF5L            | Homo sapiens TAF5-like RNA polymerase II, p300/CBP-associated factor (PCAF)-associated factor, 65kDa (TAF5L), transcript variant 1, mRNA [NM_014409]    |
| A_23_P217621  | 0,01646985 down  | -2,1333218 TAF7L           | Homo sapiens TAF7-like RNA polymerase II, TATA box binding protein (TBP)-associated factor, 50kDa (TAF7L), transcript variant 1, mRNA [NM_024885]       |
| A_24_P354724  | 0,014145938 up   | 1,6629279 TAGAP            | Homo sapiens T-cell activation RhoGTPase activating protein (TAGAP), transcript variant 2, mRNA [NM_054114]                                             |
| A_23_P63371   | 0,001195285 up   | 2,6366453 TAL1             | Homo sapiens T-cell acute lymphocytic leukemia 1 (TAL1), transcript variant 1, mRNA [NM_003189]                                                         |
| A_24_P942068  | 0,005337815 up   | 1,8964957 TANC2            | Homo sapiens tetratricopeptide repeat, ankyrin repeat and coiled-coil containing 2 (TANC2), mRNA [NM_025185]                                            |
| A_33_P3369452 | 0,001677061 up   | 1,5293593 TANGO2           | Homo sapiens transport and golgi organization 2 homolog (Drosophila) (TANGO2), transcript variant 1, mRNA [NM_001283106]                                |
| A_23_P52058   | 0,009608224 up   | 1,5336201 TARBP1           | Homo sapiens TAR (HIV-1) RNA binding protein 1 (TARBP1), mRNA [NM_005646]                                                                               |
| A_21_P0011146 | 0,001075666 up   | 1,7323678 TARDBP           | Homo sapiens TAR DNA binding protein (TARDBP), mRNA [NM_007375]                                                                                         |
| A_23_P403955  | 0,004627589 up   | 2,1084597 TARDBP           | Homo sapiens TAR DNA binding protein (TARDBP), mRNA [NM_007375]                                                                                         |
| A_33_P3286973 | 2,13E-05 down    | -2,5789876 TAS1R3          | taste receptor, type 1, member 3 [Source:HGNC Symbol;Acc:HGNC:15661] [ENST00000339381]                                                                  |
| A_33_P3260989 | 0,04753429 up    | 1,7404476 TAS1R3           | Homo sapiens taste receptor, type 1, member 3 (TAS1R3), mRNA [NM_152228]                                                                                |
| A_23_P99080   | 0,001353492 down | -2,7908025 TAS2R13         | Homo sapiens taste receptor, type 2, member 13 (TAS2R13), mRNA [NM_023920]                                                                              |
| A_23_P59825   | 0,003809263 up   | 1,507686 TAS2R16           | Homo sapiens taste receptor, type 2, member 16 (TAS2R16), mRNA [NM_016945]                                                                              |
| A_23_P340308  | 0,045174688 down | -1,6742015 TAS2R19         | Homo sapiens taste receptor, type 2, member 19 (TAS2R19), mRNA [NM_176888]                                                                              |
| A_23_P416191  | 0,037701726 down | -1,7293552 TAS2R31         | Homo sapiens taste receptor, type 2, member 31 (TAS2R31), mRNA [NM_176885]                                                                              |
| A_32_P309662  | 0,048940383 down | -1,884459 TAS2R39          | Homo sapiens taste receptor, type 2, member 39 (TAS2R39), mRNA [NM_176881]                                                                              |
| A_24_P14902   | 0,002780172 up   | 1,6159124 TAS2R42          | Homo sapiens taste receptor, type 2, member 42 (TAS2R42), mRNA [NM_181429]                                                                              |
| A_23_P367013  | 1,56E-04 down    | -4,764367 TAS2R60          | Homo sapiens taste receptor, type 2, member 60 (TAS2R60), mRNA [NM_177437]                                                                              |
| A_23_P336506  | 5,16E-04 down    | -5,0180306 TAS2R9          | Homo sapiens taste receptor, type 2, member 9 (TAS2R9), mRNA [NM_023917]                                                                                |
| A_24_P330633  | 0,039774437 down | -1,5567812 TAT             | Homo sapiens tyrosine aminotransferase (TAT), mRNA [NM_000353]                                                                                          |
| A_23_P12858   | 0,005354411 down | -2,0258272 TBATA           | Homo sapiens thymus, brain and testes associated (TBATA), mRNA [NM_152710]                                                                              |
| A_33_P3370812 | 0,024417816 down | -1,5537984 TBC1D1          | Homo sapiens TBC1 (tre-2/USP6, BUB2, cdc16) domain family, member 1, mRNA (cDNA clone IMAGE:5211948), with apparent retained intron. [BC028196]         |
| A_23_P24215   | 8,95E-04 up      | 1,6316078 TBC1D12          | Homo sapiens TBC1 domain family, member 12 (TBC1D12), mRNA [NM_015188]                                                                                  |
| A_23_P58983   | 0,004236145 up   | 1,5933094 TBC1D22B         | Homo sapiens TBC1 domain family, member 22B (TBC1D22B), transcript variant 1, mRNA [NM_017772]                                                          |
| A_23_P391637  | 0,010068996 up   | 1,5152237 TBC1D24          | Homo sapiens TBC1 domain family, member 24 (TBC1D24), transcript variant 2, mRNA [NM_020705]                                                            |
| A_33_P3267230 | 0,001090529 up   | 2,024126 TBC1D3B           | Homo sapiens TBC1 domain family, member 3B (TBC1D3B), mRNA [NM_001001417]                                                                               |
| A_33_P3344991 | 7,45E-07 down    | -2,7088768 TBC1D3L         | Homo sapiens cDNA FLJ16441 fis, clone BRAMY3003205, highly similar to TBC1 domain family member 3. [AK122833]                                           |
| A_21_P0014921 | 5,53E-05 up      | 2,2779322 TBC1D3P1-DHX40P1 | Homo sapiens TBC1D3P1-DHX40P1 readthrough transcribed pseudogene (TBC1D3P1-DHX40P1), non-coding RNA [NR_002924]                                         |
| A_21_P0011619 | 0,005528416 up   | 1,6338001 TBC1D3P5         | Homo sapiens TBC1 domain family, member 3 pseudogene 5 (TBC1D3P5), non-coding RNA [NR_033892]                                                           |
| A_23_P111273  | 0,007258558 down | -1,5076747 TBC1D7          | Homo sapiens TBC1 domain family, member 7 (TBC1D7), transcript variant 1, mRNA [NM_016495]                                                              |
| A_33_P3312194 | 0,024062831 up   | 1,5189587 TBCB             | tubulin folding cofactor B [Source:HGNC Symbol;Acc:HGNC:1989] [ENST00000392178]                                                                         |
| A_23_P121345  | 4,68E-04 up      | 1,6565269 TBCCD1           | Homo sapiens TBCC domain containing 1 (TBCCD1), transcript variant 2, mRNA [NM_018138]                                                                  |
| A_23_P212552  | 7,51E-05 up      | 1,9847479 TBL1XR1          | Homo sapiens transducin (beta)-like 1 X-linked receptor 1 (TBL1XR1), mRNA [NM_024665]                                                                   |
| A_23_P5685    | 0,003378721 up   | 1,5668216 TBR1             | Homo sapiens T-box, brain, 1 (TBR1), mRNA [NM_006593]                                                                                                   |
| A_23_P40527   | 0,008303398 up   | 1,5918165 TBX1             | Homo sapiens T-box 1 (TBX1), transcript variant a, mRNA [NM_080646]                                                                                     |
| A_32_P538017  | 0,03121254 down  | -1,5202376 TBX10           | Homo sapiens T-box 10 (TBX10), mRNA [NM_005995]                                                                                                         |
| A_23_P137705  | 0,003956246 up   | 1,6109941 TBX19            | Homo sapiens T-box 19 (TBX19), mRNA [NM_005149]                                                                                                         |
| A_33_P3307886 | 0,03623908 down  | -1,5560447 TBXA2R          | Homo sapiens thromboxane A2 receptor (TBXA2R), transcript variant a, mRNA [NM_001060]                                                                   |
| A_24_P274814  | 0,001707639 down | -2,4079053 TBXAS1          | Homo sapiens thromboxane A synthase 1 (platelet) (TBXAS1), transcript variant 2, mRNA [NM_030984]                                                       |
| A_32_P214925  | 0,013152985 down | -2,7147574 TCAF2           | Homo sapiens family with sequence similarity 115, member C (FAM115C), transcript variant 2, mRNA [NM_173678]                                            |
| A_24_P237912  | 0,010329962 up   | 2,4790177 TCAF2            | Homo sapiens family with sequence similarity 115, member C (FAM115C), transcript variant 3, mRNA [NM_001130026]                                         |
| A_23_P107051  | 0,008358733 up   | 1,5887583 TCAP             | Homo sapiens titin-cap (TCAP), mRNA [NM_003673]                                                                                                         |
| A_24_P126651  | 0,006246409 down | -2,0935302 TCEA1           | Homo sapiens transcription elongation factor A (SII), 1 (TCEA1), transcript variant 1, mRNA [NM_006756]                                                 |
| A_33_P3400057 | 4,21E-04 down    | -2,321735 TCEANC           | Homo sapiens transcription elongation factor A (SII) N-terminal and central domain containing (TCEANC), transcript variant 2, mRNA [NM_001297563]       |
| A_23_P74097   | 0,001666558 up   | 1,6200799 TCEB3            | Homo sapiens transcription elongation factor B (SIII), polypeptide 3 (110kDa, elongin A) (TCEB3), mRNA [NM_003198]                                      |
| A_24_P122403  | 0,002662758 up   | 1,5388453 TCEB3            | Homo sapiens transcription elongation factor B (SIII), polypeptide 3 (110kDa, elongin A) (TCEB3), mRNA [NM_003198]                                      |
| A_23_P133365  | 0,005858981 up   | 1,5510819 TCERG1           | Homo sapiens transcription elongation regulator 1 (TCERG1), transcript variant 1, mRNA [NM_006706]                                                      |
| A_23_P357717  | 0,012369526 down | -2,0700738 TCL1A           | Homo sapiens T-cell leukemia/lymphoma 1A (TCL1A), transcript variant 1, mRNA [NM_021966]                                                                |
| A_23_P70598   | 0,001152422 up   | 2,0072594 TCP11            | Homo sapiens t-complex 11, testis-specific (TCP11), transcript variant 2, mRNA [NM_018679]                                                              |
| A_33_P3375185 | 0,001623307 down | -1,8151797 TCTEX1D4        | Homo sapiens Tctex1 domain containing 4 (TCTEX1D4), mRNA [NM_001013632]                                                                                 |
| A_23_P80974   | 0,006150122 up   | 1,5368067 TDO2             | Homo sapiens tryptophan 2,3-dioxygenase (TDO2), mRNA [NM_005651]                                                                                        |

|                |             |      |            |           |                                                                                                                                                |
|----------------|-------------|------|------------|-----------|------------------------------------------------------------------------------------------------------------------------------------------------|
| A_33_P3373329  | 0,015174741 | down | -1,6731936 | TDRD1     | Homo sapiens tudor domain containing 1 (TDRD1), mRNA [NM_198795]                                                                               |
| A_33_P3267248  | 0,00712747  | up   | 1,6702461  | TDRD10    | Homo sapiens tudor domain containing 10 (TDRD10), transcript variant 2, mRNA [NM_182499]                                                       |
| A_33_P3232960  | 0,003624465 | up   | 1,5095251  | TDRD6     | Homo sapiens tudor domain containing 6 (TDRD6), transcript variant 1, mRNA [NM_001010870]                                                      |
| A_19_P00316714 | 0,02462068  | down | -2,1763072 | TDRG1     | Homo sapiens testis development related 1 (non-protein coding) (TDRG1), long non-coding RNA [NR_024015]                                        |
| A_23_P82000    | 8,40E-04    | up   | 1,7618442  | TEAD3     | Homo sapiens TEA domain family member 3 (TEAD3), mRNA [NM_003214]                                                                              |
| A_33_P3305958  | 7,41E-04    | down | -1,8166286 | TECPR2    | Homo sapiens tectonin beta-propeller repeat containing 2 (TECPR2), transcript variant 2, mRNA [NM_001172631]                                   |
| A_23_P207245   | 0,011572216 | up   | 2,2441416  | TEKT3     | Homo sapiens tektin 3 (TEKT3), mRNA [NM_031898]                                                                                                |
| A_33_P3283863  | 0,002991174 | down | -2,1305807 | TENM1     | Homo sapiens teneurin transmembrane protein 1 (TENM1), transcript variant 1, mRNA [NM_001163278]                                               |
| A_23_P76538    | 3,16E-04    | down | -3,702577  | TESC      | Homo sapiens tescalcin (TESC), transcript variant 1, mRNA [NM_017899]                                                                          |
| A_33_P3327265  | 2,32E-04    | down | -4,9827123 | TESPA1    | Homo sapiens thymocyte expressed, positive selection associated 1 (TESPA1), transcript variant 1, mRNA [NM_001136030]                          |
| A_19_P00806490 | 0,005431165 | down | -2,1822546 | TET1      | Homo sapiens tet methylcytosine dioxygenase 1 (TET1), mRNA [NM_030625]                                                                         |
| A_33_P3331335  | 0,001307932 | up   | 2,3462172  | TET3      | Homo sapiens tet methylcytosine dioxygenase 3 (TET3), mRNA [NM_001287491]                                                                      |
| A_23_P73637    | 0,013376932 | down | -1,5638967 | TEX13B    | Homo sapiens testis expressed 13B (TEX13B), mRNA [NM_031273]                                                                                   |
| A_33_P3261695  | 0,027087625 | up   | 1,9602823  | TEX22     | Homo sapiens testis expressed 22 (TEX22), mRNA [NM_001195082]                                                                                  |
| A_21_P0000752  | 0,03841041  | up   | 2,740108   | TEX26-AS1 | Homo sapiens TEX26 antisense RNA 1 (TEX26-AS1), transcript variant 2, long non-coding RNA [NR_038288]                                          |
| A_24_P56330    | 0,003868824 | up   | 1,5797911  | TEX29     | Homo sapiens testis expressed 29 (TEX29), transcript variant 2, mRNA [NM_152324]                                                               |
| A_32_P97862    | 0,033858668 | up   | 2,161101   | TEX38     | Homo sapiens testis expressed 38 (TEX38), transcript variant 1, mRNA [NM_001145474]                                                            |
| A_21_P0012026  | 0,001491311 | down | -2,5579803 | TEX41     | testis expressed 41 (non-protein coding) [Source:HGNC Symbol;Acc:HGNC:48667] [ENST00000432608]                                                 |
| A_33_P3361546  | 0,03297328  | up   | 1,5392259  | TFAP2A    | Homo sapiens transcription factor AP-2 alpha (activating enhancer binding protein 2 alpha) (TFAP2A), transcript variant 2, mRNA [NM_001032280] |
| A_23_P386973   | 0,002409866 | up   | 1,7987922  | TFAP2D    | Homo sapiens transcription factor AP-2 delta (activating enhancer binding protein 2 delta) (TFAP2D), mRNA [NM_172238]                          |
| A_23_P141092   | 0,002279019 | down | -1,9685519 | TFAP4     | Homo sapiens transcription factor AP-4 (activating enhancer binding protein 4) (TFAP4), mRNA [NM_003223]                                       |
| A_23_P5301     | 0,001109305 | up   | 2,775645   | TFCP2L1   | Homo sapiens transcription factor CP2-like 1 (TFCP2L1), mRNA [NM_014553]                                                                       |
| A_33_P3224710  | 0,036867216 | down | -1,8219358 | TFEC      | Homo sapiens transcription factor EC (TFEC), transcript variant 1, mRNA [NM_012252]                                                            |
| A_32_P184394   | 0,049562704 | up   | 1,5260336  | TFEC      | Homo sapiens transcription factor EC (TFEC), transcript variant 1, mRNA [NM_012252]                                                            |
| A_23_P57364    | 0,004548416 | down | -1,9760828 | TFF2      | Homo sapiens trefoil factor 2 (TFF2), mRNA [NM_005423]                                                                                         |
| A_33_P3334305  | 0,011367063 | down | -2,5334983 | TFF3      | Homo sapiens trefoil factor 3 (intestinal) (TFF3), mRNA [NM_003226]                                                                            |
| A_23_P377291   | 0,002573235 | up   | 2,3051026  | TGFA      | Homo sapiens transforming growth factor, alpha (TGFA), transcript variant 1, mRNA [NM_003236]                                                  |
| A_33_P3313825  | 0,02549217  | up   | 1,7617736  | TGFBR2    | PREDICTED: Homo sapiens transforming growth factor, beta receptor II (70/80kDa) (TGFBR2), transcript variant X1, mRNA [XM_006713316]           |
| A_23_P211957   | 0,00181537  | up   | 2,3267586  | TGFBR2    | Homo sapiens transforming growth factor, beta receptor II (70/80kDa) (TGFBR2), transcript variant 1, mRNA [NM_001024847]                       |
| A_33_P3311717  | 1,02E-05    | down | -2,9635978 | TGIF1     | Homo sapiens TGFB-induced factor homeobox 1 (TGIF1), transcript variant 5, mRNA [NM_173209]                                                    |
| A_23_P153197   | 8,17E-04    | up   | 1,7488767  | TGIF1     | Homo sapiens TGFB-induced factor homeobox 1 (TGIF1), transcript variant 1, mRNA [NM_170695]                                                    |
| A_23_P41241    | 0,003828574 | up   | 1,5058489  | TGM4      | Homo sapiens transglutaminase 4 (TGM4), mRNA [NM_003241]                                                                                       |
| A_33_P3210463  | 1,90E-08    | down | -3,9146557 | TGM6      | Homo sapiens transglutaminase 6 (TGM6), transcript variant 1, mRNA [NM_198994]                                                                 |
| A_24_P413988   | 0,00339076  | up   | 1,5886073  | TGOLN2    | Homo sapiens trans-golgi network protein 2 (TGOLN2), transcript variant 1, mRNA [NM_006464]                                                    |
| A_24_P101786   | 0,004257472 | down | -1,8038639 | THADA     | Homo sapiens thyroid adenoma associated (THADA), transcript variant 5, mRNA [NM_001271644]                                                     |
| A_24_P928510   | 0,04481491  | down | -1,7938004 | THEM4     | Homo sapiens thioesterase superfamily member 4 (THEM4), mRNA [NM_053055]                                                                       |
| A_24_P85775    | 0,025469813 | up   | 1,6504298  | THEMIS2   | Homo sapiens thymocyte selection associated family member 2 (THEMIS2), transcript variant 2, mRNA [NM_001039477]                               |
| A_24_P377124   | 0,009573123 | down | -2,5390458 | THPO      | Homo sapiens thrombopoietin (THPO), transcript variant 1, mRNA [NM_000460]                                                                     |
| A_33_P3409974  | 0,002099822 | up   | 2,5549796  | THRB      | Homo sapiens thyroid hormone receptor, beta (THRB), transcript variant 4, mRNA [NM_001252634]                                                  |
| A_23_P363954   | 0,029226936 | up   | 1,7492441  | THRSP     | Homo sapiens thyroid hormone responsive (THRSP), mRNA [NM_003251]                                                                              |
| A_24_P405430   | 0,013205801 | up   | 1,5328708  | TIA1      | Homo sapiens TIA1 cytotoxic granule-associated RNA binding protein (TIA1), transcript variant 2, mRNA [NM_022173]                              |
| A_23_P90311    | 0,019222543 | up   | 1,604598   | TICAM1    | Homo sapiens toll-like receptor adaptor molecule 1 (TICAM1), mRNA [NM_182919]                                                                  |
| A_23_P129577   | 0,014836741 | up   | 1,8727757  | TIGD7     | Homo sapiens tigger transposable element derived 7 (TIGD7), mRNA [NM_033208]                                                                   |
| A_33_P3235213  | 0,0298507   | down | -1,948343  | TIGIT     | Homo sapiens T cell immunoreceptor with Ig and ITIM domains (TIGIT), mRNA [NM_173799]                                                          |
| A_21_P0000013  | 6,13E-04    | down | -1,6694846 | TIMM8A    | Homo sapiens translocase of inner mitochondrial membrane 8 homolog A (yeast) (TIMM8A), transcript variant 2, mRNA [NM_001145951]               |
| A_33_P3421656  | 0,006840956 | up   | 1,8606685  | TINAG     | Homo sapiens tubulointerstitial nephritis antigen (TINAG), mRNA [NM_014464]                                                                    |
| A_23_P397856   | 0,007624481 | down | -1,6988524 | TIRAP     | Homo sapiens toll-interleukin 1 receptor (TIR) domain containing adaptor protein (TIRAP), transcript variant 3, mRNA [NM_001039661]            |
| A_23_P202905   | 0,018236134 | up   | 1,5477827  | TIRAP     | Homo sapiens toll-interleukin 1 receptor (TIR) domain containing adaptor protein (TIRAP), transcript variant 2, mRNA [NM_148910]               |
| A_23_P81811    | 0,006519184 | up   | 1,694667   | TJAP1     | Homo sapiens tight junction associated protein 1 (peripheral) (TJAP1), transcript variant 4, mRNA [NM_080604]                                  |
| A_24_P193435   | 0,003998066 | up   | 1,6972336  | TJP1      | Homo sapiens tight junction protein 1 (TJP1), transcript variant 1, mRNA [NM_003257]                                                           |
| A_33_P3215529  | 6,39E-04    | down | -2,193177  | TJP2      | tight junction protein 2 [Source:HGNC Symbol;Acc:HGNC:11828] [ENST00000413932]                                                                 |
| A_23_P9293     | 0,001013818 | up   | 2,1244488  | TJP2      | Homo sapiens tight junction protein 2 (TJP2), transcript variant 1, mRNA [NM_004817]                                                           |
| A_24_P201153   | 0,027023602 | up   | 1,7102287  | TJP2      | Homo sapiens tight junction protein 2 (TJP2), transcript variant 2, mRNA [NM_201629]                                                           |
| A_23_P259901   | 0,004215826 | down | -2,026023  | TKTL1     | Homo sapiens transketolase-like 1 (TKTL1), transcript variant 1, mRNA [NM_012253]                                                              |
| A_33_P3345210  | 0,01487583  | down | -1,7977148 | TLCD2     | Homo sapiens TLC domain containing 2 (TLCD2), mRNA [NM_001164407]                                                                              |
| A_33_P3217731  | 0,001285348 | up   | 1,8934226  | TLE1      | transducin-like enhancer of split 1 (E(sp1) homolog, Drosophila) [Source:HGNC Symbol;Acc:HGNC:11837] [ENST00000376484]                         |
| A_23_P342934   | 7,65E-05    | up   | 2,0191696  | TLE3      | Homo sapiens transducin-like enhancer of split 3 (TLE3), transcript variant 1, mRNA [NM_005078]                                                |
| A_21_P0000156  | 0,010980592 | down | -2,4066725 | TLL1      | Homo sapiens tolloid-like 1 (TLL1), transcript variant 2, mRNA [NM_001204760]                                                                  |
| A_33_P3264815  | 8,16E-04    | down | -1,676049  | TLN2      | Homo sapiens talin 2 (TLN2), mRNA [NM_015059]                                                                                                  |
| A_23_P92499    | 3,17E-04    | up   | 6,9574194  | TLR2      | Homo sapiens toll-like receptor 2 (TLR2), mRNA [NM_003264]                                                                                     |
| A_24_P69538    | 0,041333888 | up   | 1,9853272  | TLR4      | Homo sapiens toll-like receptor 4 (TLR4), transcript variant 1, mRNA [NM_138554]                                                               |



|               |             |      |            |              |                                                                                                                           |
|---------------|-------------|------|------------|--------------|---------------------------------------------------------------------------------------------------------------------------|
| A_33_P3263423 | 0,002148818 | down | -1,6689425 | TLR5         | Homo sapiens toll-like receptor 5 (TLR5), mRNA [NM_003268]                                                                |
| A_23_P73837   | 0,008896939 | up   | 1,7144734  | TLR8         | Homo sapiens toll-like receptor 8 (TLR8), transcript variant 1, mRNA [NM_016610]                                          |
| A_33_P3380807 | 0,03491465  | down | -2,0183103 | TLR9         | Homo sapiens toll-like receptor 9 (TLR9), mRNA [NM_017442]                                                                |
| A_23_P77117   | 0,04764301  | down | -1,6495701 | TM6SF1       | Homo sapiens transmembrane 6 superfamily member 1 (TM6SF1), transcript variant 1, mRNA [NM_023003]                        |
| A_23_P142403  | 8,10E-04    | down | -2,7095315 | TM6SF2       | Homo sapiens transmembrane 6 superfamily member 2 (TM6SF2), mRNA [NM_001001524]                                           |
| A_33_P3308307 | 0,001983899 | up   | 2,0538886  | TMC1         | Homo sapiens transmembrane channel-like 1 (TMC1), mRNA [NM_138691]                                                        |
| A_24_P305933  | 0,048089523 | up   | 1,5275813  | TMCC3        | Homo sapiens transmembrane and coiled-coil domain family 3 (TMCC3), transcript variant 1, mRNA [NM_020698]                |
| A_23_P355067  | 0,023844171 | up   | 1,5109117  | TMCO1        | Homo sapiens transmembrane and coiled-coil domains 1 (TMCO1), transcript variant 1, mRNA [NM_019026]                      |
| A_32_P87649   | 0,045854766 | down | -1,9546345 | TMCO2        | Homo sapiens transmembrane and coiled-coil domains 2 (TMCO2), mRNA [NM_001008740]                                         |
| A_23_P158277  | 0,023869367 | up   | 1,6801027  | TMCO4        | Homo sapiens transmembrane and coiled-coil domains 4 (TMCO4), mRNA [NM_181719]                                            |
| A_33_P3350858 | 0,013168083 | up   | 1,8672395  | TMCO5B       | Homo sapiens transmembrane and coiled-coil domains 5B, pseudogene (TMCO5B), non-coding RNA [NR_046005]                    |
| A_21_P0012765 | 7,78E-04    | up   | 1,869087   | TMED11P      | Homo sapiens transmembrane emp24 protein transport domain containing 11, pseudogene (TMED11P), non-coding RNA [NR_033768] |
| A_33_P3327270 | 0,004760842 | down | -2,3287694 | TMED7-TICAM2 | Homo sapiens TMED7-TICAM2 readthrough (TMED7-TICAM2), transcript variant 2, mRNA [NM_001164469]                           |
| A_23_P125383  | 0,025502855 | up   | 2,4258204  | TMEFF2       | Homo sapiens transmembrane protein with EGF-like and two follistatin-like domains 2 (TMEFF2), mRNA [NM_016192]            |
| A_23_P349966  | 0,00828659  | up   | 1,5732754  | TMEM130      | Homo sapiens transmembrane protein 130 (TMEM130), transcript variant 2, mRNA [NM_152913]                                  |
| A_32_P153812  | 0,007699005 | up   | 2,5732741  | TMEM132B     | Homo sapiens transmembrane protein 132B (TMEM132B), transcript variant 1, mRNA [NM_052907]                                |
| A_24_P6626    | 0,019462455 | up   | 1,8850728  | TMEM132B     | Homo sapiens transmembrane protein 132B (TMEM132B), transcript variant 1, mRNA [NM_052907]                                |
| A_24_P127075  | 4,43E-04    | down | -1,8790023 | TMEM135      | Homo sapiens transmembrane protein 135 (TMEM135), transcript variant 1, mRNA [NM_022918]                                  |
| A_24_P372134  | 0,00169985  | down | -2,6296895 | TMEM140      | Homo sapiens transmembrane protein 140 (TMEM140), mRNA [NM_018295]                                                        |
| A_33_P3257279 | 0,003539773 | down | -1,848721  | TMEM145      | Homo sapiens transmembrane protein 145 (TMEM145), mRNA [NM_173633]                                                        |
| A_21_P0000784 | 0,027640052 | up   | 1,5818982  | TMEM147-AS1  | Homo sapiens TMEM147 antisense RNA 1 (TMEM147-AS1), long non-coding RNA [NR_038396]                                       |
| A_23_P354217  | 0,002540597 | down | -2,0574203 | TMEM151A     | Homo sapiens transmembrane protein 151A (TMEM151A), mRNA [NM_153266]                                                      |
| A_23_P369899  | 0,025525356 | up   | 2,1845257  | TMEM158      | Homo sapiens transmembrane protein 158 (gene/pseudogene) (TMEM158), mRNA [NM_015444]                                      |
| A_23_P344594  | 0,008980894 | down | -2,6200573 | TMEM174      | Homo sapiens transmembrane protein 174 (TMEM174), mRNA [NM_153217]                                                        |
| A_33_P3249716 | 0,006870549 | down | -1,5627234 | TMEM178A     | transmembrane protein 178A [Source:HGNC Symbol;Acc:HGNC:28517] [ENST00000437068]                                          |
| A_24_P93206   | 0,030346766 | down | -2,3288531 | TMEM179      | Homo sapiens transmembrane protein 179 (TMEM179), transcript variant 2, mRNA [NM_001286390]                               |
| A_23_P331943  | 2,36E-04    | up   | 1,7875054  | TMEM181      | Homo sapiens transmembrane protein 181 (TMEM181), mRNA [NM_020823]                                                        |
| A_23_P18739   | 3,87E-05    | up   | 2,4748974  | TMEM184C     | Homo sapiens transmembrane protein 184C (TMEM184C), mRNA [NM_018241]                                                      |
| A_33_P3259801 | 0,003059276 | up   | 1,6699651  | TMEM189      | Homo sapiens transmembrane protein 189 (TMEM189), transcript variant 1, mRNA [NM_199129]                                  |
| A_24_P126628  | 2,54E-04    | up   | 2,0323074  | TMEM194A     | Homo sapiens transmembrane protein 194A (TMEM194A), transcript variant 2, mRNA [NM_015257]                                |
| A_33_P3389261 | 0,013637642 | down | -1,9081903 | TMEM194B     | Homo sapiens transmembrane protein 194B (TMEM194B), mRNA [NM_001142645]                                                   |
| A_23_P94552   | 0,00720488  | up   | 1,5140795  | TMEM2        | Homo sapiens transmembrane protein 2 (TMEM2), transcript variant 1, mRNA [NM_013390]                                      |
| A_24_P933011  | 1,52E-04    | down | -2,0849667 | TMEM200C     | Homo sapiens transmembrane protein 200C (TMEM200C), mRNA [NM_001080209]                                                   |
| A_33_P3239417 | 0,03114558  | up   | 2,1724145  | TMEM200C     | Homo sapiens transmembrane protein 200C (TMEM200C), mRNA [NM_001080209]                                                   |
| A_24_P522631  | 0,04556544  | down | -1,8878886 | TMEM201      | Homo sapiens transmembrane protein 201 (TMEM201), transcript variant 1, mRNA [NM_001130924]                               |
| A_23_P26062   | 0,038354557 | up   | 2,1736763  | TMEM202      | Homo sapiens transmembrane protein 202 (TMEM202), mRNA [NM_001080462]                                                     |
| A_33_P3270996 | 0,005080934 | up   | 1,5025216  | TMEM207      | Homo sapiens transmembrane protein 207 (TMEM207), mRNA [NM_207316]                                                        |
| A_33_P3233784 | 0,016025638 | down | -3,2363856 | TMEM211      | Homo sapiens transmembrane protein 211 (TMEM211), mRNA [NM_001001663]                                                     |
| A_24_P706953  | 0,004520026 | up   | 1,5907991  | TMEM213      | Homo sapiens transmembrane protein 213 (TMEM213), mRNA [NM_001085429]                                                     |
| A_33_P3266639 | 0,011555171 | up   | 1,545429   | TMEM220      | Homo sapiens transmembrane protein 220 (TMEM220), mRNA [NM_001004313]                                                     |
| A_33_P3411612 | 0,008939663 | down | -3,4461539 | TMEM221      | Homo sapiens transmembrane protein 221 (TMEM221), mRNA [NM_001190844]                                                     |
| A_24_P381975  | 6,25E-04    | down | -2,2215624 | TMEM231      | Homo sapiens transmembrane protein 231 (TMEM231), transcript variant 1, mRNA [NM_001077416]                               |
| A_32_P489986  | 0,004345575 | down | -2,3774643 | TMEM232      | Homo sapiens transmembrane protein 232 (TMEM232), mRNA [NM_001039763]                                                     |
| A_33_P3236558 | 0,004936373 | down | -1,5385344 | TMEM234      | Homo sapiens transmembrane protein 234 (TMEM234), mRNA [NM_019118]                                                        |
| A_33_P3362153 | 0,035983607 | down | -1,659743  | TMEM238      | Homo sapiens transmembrane protein 238 (TMEM238), mRNA [NM_001190764]                                                     |
| A_33_P3219459 | 0,001092172 | down | -1,9866561 | TMEM240      | Homo sapiens transmembrane protein 240 (TMEM240), mRNA [NM_001114748]                                                     |
| A_33_P3282597 | 0,016761415 | up   | 1,6388777  | TMEM241      | transmembrane protein 241 [Source:HGNC Symbol;Acc:HGNC:31723] [ENST00000580025]                                           |
| A_24_P132633  | 4,68E-04    | down | -2,5473466 | TMEM252      | Homo sapiens transmembrane protein 252 (TMEM252), mRNA [NM_153237]                                                        |
| A_33_P3211327 | 0,001855039 | down | -2,7316775 | TMEM262      | transmembrane protein 262 [Source:HGNC Symbol;Acc:HGNC:49389] [ENST00000334821]                                           |
| A_21_P0000560 | 0,040213693 | down | -1,5650579 | TMEM30C      | Homo sapiens transmembrane protein 30C (TMEM30C), transcript variant 2, non-coding RNA [NR_028358]                        |
| A_33_P3225357 | 0,004249297 | up   | 1,578592   | TMEM30C      | Homo sapiens transmembrane protein 30C (TMEM30C), transcript variant 1, non-coding RNA [NR_028357]                        |
| A_33_P3423270 | 0,011475662 | up   | 1,5278215  | TMEM40       | Homo sapiens transmembrane protein 40 (TMEM40), transcript variant 1, mRNA [NM_001284406]                                 |
| A_33_P3327567 | 0,031175122 | up   | 1,5246078  | TMEM41A      | transmembrane protein 41A [Source:HGNC Symbol;Acc:HGNC:30544] [ENST00000467061]                                           |
| A_21_P0014585 | 0,002921852 | down | -2,284614  | TMEM44-AS1   | Homo sapiens TMEM44 antisense RNA 1 (TMEM44-AS1), transcript variant 1, long non-coding RNA [NR_047573]                   |
| A_24_P305623  | 0,004671027 | down | -1,6904352 | TMEM50B      | Homo sapiens transmembrane protein 50B (TMEM50B), transcript variant 1, mRNA [NM_006134]                                  |
| A_23_P318938  | 2,13E-04    | down | -2,6094017 | TMEM52B      | Homo sapiens transmembrane protein 52B (TMEM52B), transcript variant 1, mRNA [NM_153022]                                  |
| A_33_P3332393 | 0,003235944 | down | -1,7774554 | TMEM53       | transmembrane protein 53 [Source:HGNC Symbol;Acc:HGNC:26186] [ENST00000372244]                                            |
| A_23_P422083  | 0,001214894 | down | -1,9114054 | TMEM55A      | Homo sapiens transmembrane protein 55A (TMEM55A), mRNA [NM_018710]                                                        |
| A_33_P3332284 | 0,00651513  | up   | 1,6417179  | TMEM59       | transmembrane protein 59 [Source:HGNC Symbol;Acc:HGNC:1239] [ENST00000371337]                                             |
| A_23_P167856  | 0,044093177 | down | -1,6331154 | TMEM63B      | Homo sapiens transmembrane protein 63B (TMEM63B), mRNA [NM_018426]                                                        |
| A_33_P3406661 | 0,022777172 | up   | 2,0687163  | TMEM63C      | Homo sapiens transmembrane protein 63C (TMEM63C), mRNA [NM_020431]                                                        |

|               |                  |            |             |                                                                                                                       |
|---------------|------------------|------------|-------------|-----------------------------------------------------------------------------------------------------------------------|
| A_24_P171058  | 0,006507585 up   | 1,5541812  | TMEM64      | Homo sapiens transmembrane protein 64 (TMEM64), transcript variant 1, mRNA [NM_001008495]                             |
| A_24_P704446  | 0,010996197 down | -1,9674433 | TMEM72      | Homo sapiens transmembrane protein 72 (TMEM72), mRNA [NM_001123376]                                                   |
| A_33_P3722782 | 0,004140231 up   | 2,1367366  | TMEM72-AS1  | Homo sapiens TMEM72 antisense RNA 1 (TMEM72-AS1), long non-coding RNA [NR_033842]                                     |
| A_24_P341344  | 0,004393045 down | -2,2883487 | TMEM75      | Homo sapiens transmembrane protein 75 (TMEM75), long non-coding RNA [NR_103558]                                       |
| A_23_P46690   | 0,029625282 up   | 1,5715126  | TMEM81      | Homo sapiens transmembrane protein 81 (TMEM81), mRNA [NM_203376]                                                      |
| A_33_P3326553 | 0,006993435 down | -1,7355269 | TMEM82      | transmembrane protein 82 [Source:HGNC Symbol;Acc:HGNC:32350] [ENST00000375782]                                        |
| A_24_P65098   | 0,019066507 up   | 1,7904749  | TMEM87A     | Homo sapiens transmembrane protein 87A (TMEM87A), transcript variant 2, mRNA [NM_0011110503]                          |
| A_24_P317827  | 0,006681121 down | -1,6428399 | TMEM8B      | Homo sapiens transmembrane protein 8B (TMEM8B), transcript variant 1, mRNA [NM_001042590]                             |
| A_33_P3277611 | 4,34E-04 down    | -3,7270422 | TMEM8C      | Homo sapiens transmembrane protein 8C (TMEM8C), mRNA [NM_001080483]                                                   |
| A_24_P307289  | 0,002629065 down | -2,6153393 | TMEM95      | Homo sapiens transmembrane protein 95 (TMEM95), mRNA [NM_198154]                                                      |
| A_33_P3346267 | 0,018056259 up   | 1,7210217  | TMIGD1      | Homo sapiens transmembrane and immunoglobulin domain containing 1 (TMIGD1), mRNA [NM_206832]                          |
| A_33_P3412613 | 4,39E-05 down    | -2,155985  | TMPO        | Homo sapiens thymopoietin (TMPO), transcript variant 2, mRNA [NM_001032283]                                           |
| A_21_P0012777 | 0,033450183 up   | 2,2758837  | TMPRSS11BNL | Homo sapiens TMPRSS11B N-terminal like, pseudogene (TMPRSS11BNL), non-coding RNA [NR_104048]                          |
| A_21_P0000760 | 3,83E-04 down    | -2,4461968 | TMPRSS4-AS1 | Homo sapiens TMPRSS4 antisense RNA 1 (TMPRSS4-AS1), long non-coding RNA [NR_038318]                                   |
| A_23_P211493  | 0,001073249 down | -2,1346393 | TMPRSS6     | Homo sapiens transmembrane protease, serine 6 (TMPRSS6), transcript variant 2, mRNA [NM_153609]                       |
| A_33_P3814473 | 0,003317247 up   | 2,0750904  | TMSB4XP1    | 601859229F1 NIH_MGC_58 Homo sapiens cDNA clone IMAGE:4069735 5', mRNA sequence [BF248073]                             |
| A_23_P171388  | 0,002191657 down | -2,1227064 | TMSB4Y      | Homo sapiens thymosin beta 4, Y-linked (TMSB4Y), mRNA [NM_004202]                                                     |
| A_33_P3249364 | 0,035291966 down | -1,6209273 | TMTC1       | transmembrane and tetratricopeptide repeat containing 1 [Source:HGNC Symbol;Acc:HGNC:24099] [ENST00000553189]         |
| A_32_P2452    | 0,006993477 up   | 2,3308442  | TMTC1       | Homo sapiens transmembrane and tetratricopeptide repeat containing 1 (TMTC1), transcript variant 2, mRNA [NM_175861]  |
| A_23_P203957  | 0,00553861 up    | 2,5570455  | TMTC1       | Homo sapiens transmembrane and tetratricopeptide repeat containing 1 (TMTC1), transcript variant 2, mRNA [NM_175861]  |
| A_24_P944222  | 0,029569123 down | -1,6858131 | TMTC3       | Homo sapiens transmembrane and tetratricopeptide repeat containing 3 (TMTC3), mRNA [NM_181783]                        |
| A_33_P3304688 | 0,007362048 down | -2,0754933 | TNAP        | Homo sapiens NIK-associated protein mRNA, complete cds. [AF463496]                                                    |
| A_23_P421423  | 0,027894204 up   | 1,5095543  | TNFAIP2     | Homo sapiens tumor necrosis factor, alpha-induced protein 2 (TNFAIP2), mRNA [NM_006291]                               |
| A_24_P157926  | 0,002374796 up   | 2,8410902  | TNFAIP3     | Homo sapiens tumor necrosis factor, alpha-induced protein 3 (TNFAIP3), transcript variant 3, mRNA [NM_006290]         |
| A_23_P46356   | 0,008898825 up   | 1,8801632  | TNFAIP8L2   | Homo sapiens tumor necrosis factor, alpha-induced protein 8-like 2 (TNFAIP8L2), mRNA [NM_024575]                      |
| A_23_P255653  | 5,09E-04 up      | 1,7924916  | TNFRSF10A   | Homo sapiens tumor necrosis factor receptor superfamily, member 10a (TNFRSF10A), mRNA [NM_003844]                     |
| A_23_P91764   | 0,001150632 down | -2,0252533 | TNFRSF13C   | Homo sapiens tumor necrosis factor receptor superfamily, member 13C (TNFRSF13C), mRNA [NM_052945]                     |
| A_33_P3286302 | 0,009436668 down | -1,5180855 | TNFRSF14    | tumor necrosis factor receptor superfamily, member 14 [Source:HGNC Symbol;Acc:HGNC:11912] [ENST00000463835]           |
| A_33_P3248962 | 0,021524772 up   | 2,4108338  | TNFRSF14    | Homo sapiens tumor necrosis factor receptor superfamily, member 14 (TNFRSF14), transcript variant 1, mRNA [NM_003820] |
| A_24_P411121  | 0,037561987 down | -1,9422615 | TNFRSF18    | Homo sapiens tumor necrosis factor receptor superfamily, member 18 (TNFRSF18), transcript variant 2, mRNA [NM_148901] |
| A_23_P126844  | 0,02995942 up    | 1,5412451  | TNFRSF25    | Homo sapiens tumor necrosis factor receptor superfamily, member 25 (TNFRSF25), transcript variant 1, mRNA [NM_148965] |
| A_33_P3286157 | 0,004830378 down | -2,1540418 | TNFRSF4     | Homo sapiens tumor necrosis factor receptor superfamily, member 4 (TNFRSF4), mRNA [NM_003327]                         |
| A_23_P218646  | 0,018698787 up   | 1,9780052  | TNFRSF6B    | Homo sapiens tumor necrosis factor receptor superfamily, member 6b, decoy (TNFRSF6B), mRNA [NM_003823]                |
| A_23_P115444  | 0,004894888 up   | 1,6306903  | TNFSF18     | Homo sapiens tumor necrosis factor (ligand) superfamily, member 18 (TNFSF18), mRNA [NM_005092]                        |
| A_23_P386478  | 0,025265278 up   | 1,9329857  | TNIP3       | Homo sapiens TNFAIP3 interacting protein 3 (TNIP3), transcript variant 1, mRNA [NM_024873]                            |
| A_33_P3365732 | 0,005786107 down | -1,573599  | TNKS1BP1    | Homo sapiens tankyrase 1 binding protein 1, 182kDa (TNKS1BP1), mRNA [NM_033396]                                       |
| A_23_P125588  | 0,0490513 up     | 1,54665    | TNMD        | Homo sapiens tenomodulin (TNMD), mRNA [NM_022144]                                                                     |
| A_23_P24784   | 0,029587021 up   | 2,1108358  | TNNI2       | Homo sapiens troponin I type 2 (skeletal, fast) (TNNI2), transcript variant 1, mRNA [NM_003282]                       |
| A_23_P67453   | 0,023669345 down | -1,8173149 | TNNI3       | Homo sapiens troponin I type 3 (cardiac) (TNNI3), mRNA [NM_000363]                                                    |
| A_23_P165504  | 0,039379798 up   | 2,2714815  | TNP1        | Homo sapiens transition protein 1 (during histone to protamine replacement) (TNP1), mRNA [NM_003284]                  |
| A_24_P260440  | 5,60E-05 up      | 2,180152   | TNPO1       | Homo sapiens transportin 1 (TNPO1), transcript variant 1, mRNA [NM_002270]                                            |
| A_23_P377434  | 0,021940421 up   | 1,530816   | TNRC18      | Homo sapiens trinucleotide repeat containing 18 (TNRC18), mRNA [NM_001080495]                                         |
| A_33_P3570228 | 9,14E-04 down    | -1,8805723 | TNRC18P1    | Homo sapiens TNRC18P1 (TNRC18P1), non-coding RNA [NR_077215]                                                          |
| A_23_P349310  | 1,15E-04 up      | 1,7653097  | TNRC6A      | Homo sapiens trinucleotide repeat containing 6A (TNRC6A), mRNA [NM_014494]                                            |
| A_33_P3302423 | 0,044048876 up   | 1,766496   | TNRC6C      | Homo sapiens trinucleotide repeat containing 6C (TNRC6C), transcript variant 1, mRNA [NM_001142640]                   |
| A_23_P207850  | 0,007030803 up   | 1,9151545  | TNS4        | Homo sapiens tensin 4 (TNS4), mRNA [NM_032865]                                                                        |
| A_24_P307135  | 1,96E-04 down    | -2,0157833 | TNXB        | Homo sapiens tenascin XB (TNXB), transcript variant XB, mRNA [NM_019105]                                              |
| A_23_P164179  | 3,94E-04 up      | 1,9493697  | TOB1        | Homo sapiens transducer of ERBB2, 1 (TOB1), transcript variant 1, mRNA [NM_005749]                                    |
| A_32_P179676  | 8,87E-04 up      | 1,7608206  | TOB2        | Homo sapiens transducer of ERBB2, 2 (TOB2), mRNA [NM_016272]                                                          |
| A_33_P3348011 | 0,003174414 down | -2,6672611 | TOB2P1      | Homo sapiens transducer of ERBB2, 2 pseudogene 1 (TOB2P1), non-coding RNA [NR_002936]                                 |
| A_23_P337155  | 0,012419402 down | -1,567834  | TOM1L2      | Homo sapiens target of myb1-like 2 (chicken) (TOM1L2), transcript variant 3, mRNA [NM_001082968]                      |
| A_23_P141180  | 0,008375721 up   | 1,5733606  | TOM1L2      | Homo sapiens target of myb1-like 2 (chicken) (TOM1L2), transcript variant 3, mRNA [NM_001082968]                      |
| A_24_P393838  | 0,004678244 up   | 1,5692942  | TOMM20      | Homo sapiens translocase of outer mitochondrial membrane 20 homolog (yeast) (TOMM20), mRNA [NM_014765]                |
| A_24_P117942  | 4,98E-06 down    | -4,4766316 | TOMM20L     | Homo sapiens translocase of outer mitochondrial membrane 20 homolog (yeast)-like (TOMM20L), mRNA [NM_207377]          |
| A_24_P1054    | 0,002303528 down | -1,7970877 | TONSL       | Homo sapiens tonsoku-like, DNA repair protein (TONSL), mRNA [NM_013432]                                               |
| A_24_P374382  | 0,005223304 up   | 2,0220137  | TOP1P2      | Homo sapiens topoisomerase (DNA) I pseudogene 2 (TOP1P2), non-coding RNA [NR_001283]                                  |
| A_33_P3312366 | 0,014641984 up   | 1,5618618  | TOP3B       | Homo sapiens topoisomerase (DNA) III beta (TOP3B), transcript variant 1, mRNA [NM_003935]                             |
| A_33_P3275835 | 0,042101268 down | -1,5249183 | TOR2A       | Homo sapiens torsin family 2, member A (TOR2A), transcript variant 3, mRNA [NM_001134430]                             |
| A_33_P3247403 | 8,56E-06 down    | -4,1901817 | TOR3A       | Homo sapiens torsin family 3, member A (TOR3A), mRNA [NM_022371]                                                      |
| A_23_P147109  | 0,004592277 up   | 1,9116986  | TOR4A       | Homo sapiens torsin family 4, member A (TOR4A), mRNA [NM_017723]                                                      |
| A_23_P12526   | 6,79E-04 up      | 1,8588327  | TP53BP2     | Homo sapiens tumor protein p53 binding protein 2 (TP53BP2), transcript variant 2, mRNA [NM_005426]                    |

|                |             |      |            |              |                                                                                                                                 |
|----------------|-------------|------|------------|--------------|---------------------------------------------------------------------------------------------------------------------------------|
| A_33_P3286846  | 0,001826862 | down | -3,2133377 | TP53TG3C     | Homo sapiens TP53 target 3C (TP53TG3C), transcript variant 1, mRNA [NM_001205259]                                               |
| A_24_P273756   | 0,001521351 | down | -1,6682527 | TP63         | Homo sapiens tumor protein p63 (TP63), transcript variant 1, mRNA [NM_003722]                                                   |
| A_24_P413470   | 0,004955743 | down | -2,1662354 | TP73         | Homo sapiens tumor protein p73 (TP73), transcript variant 1, mRNA [NM_005427]                                                   |
| A_33_P3296831  | 0,005377436 | down | -1,6416179 | TP73         | Homo sapiens tumor protein p73 (TP73), transcript variant 10, mRNA [NM_001204186]                                               |
| A_23_P131771   | 0,006516386 | up   | 1,6746222  | TPD52L2      | Homo sapiens tumor protein D52-like 2 (TPD52L2), transcript variant 1, mRNA [NM_199360]                                         |
| A_23_P150595   | 0,017153978 | up   | 1,7113118  | TPH1         | Homo sapiens tryptophan hydroxylase 1 (TPH1), mRNA [NM_004179]                                                                  |
| A_33_P3346193  | 1,45E-04    | down | -2,5340145 | TPM3         | Homo sapiens tropomyosin 3 (TPM3), transcript variant Tpm3.2, mRNA [NM_001043351]                                               |
| A_33_P3405848  | 0,03717553  | down | -1,7990907 | TPO          | Homo sapiens thyroid peroxidase (TPO), transcript variant 2, mRNA [NM_175719]                                                   |
| A_33_P3405839  | 0,025762493 | down | -2,0435247 | TPO          | Homo sapiens thyroid peroxidase (TPO), transcript variant 5, mRNA [NM_175722]                                                   |
| A_33_P3324454  | 0,003751222 | down | -1,8295172 | TPP1         | Homo sapiens tripeptidyl peptidase I (TPP1), mRNA [NM_000391]                                                                   |
| A_23_P26294    | 4,71E-05    | down | -3,6269126 | TPSG1        | Homo sapiens tryptase gamma 1 (TPSG1), mRNA [NM_012467]                                                                         |
| A_33_P3247392  | 0,005679519 | up   | 1,6498615  | TPTE         | Homo sapiens transmembrane phosphatase with tensin homology (TPTE), transcript variant 1, mRNA [NM_199261]                      |
| A_21_P0011133  | 0,001047304 | down | -2,943495  | TPTE2        | Homo sapiens transmembrane phosphoinositide 3-phosphatase and tensin homolog 2 (TPTE2), transcript variant 3, mRNA [NM_199254]  |
| A_24_P118052   | 0,02178078  | up   | 2,2166007  | TPTE2        | Homo sapiens transmembrane phosphoinositide 3-phosphatase and tensin homolog 2 (TPTE2), transcript variant 3, mRNA [NM_199254]  |
| A_21_P0012240  | 0,017024474 | up   | 1,5177863  | TPTEP1       | Homo sapiens transmembrane phosphatase with tensin homology pseudogene 1 (TPTEP1), non-coding RNA [NR_001591]                   |
| A_21_P0000637  | 4,37E-04    | down | -1,8235024 | TRAF3IP2-AS1 | Homo sapiens TRAF3IP2 antisense RNA 1 (TRAF3IP2-AS1), transcript variant 4, long non-coding RNA [NR_034111]                     |
| A_23_P75921    | 0,011485987 | up   | 1,5575202  | TRAF6        | Homo sapiens TNF receptor-associated factor 6, E3 ubiquitin protein ligase (TRAF6), transcript variant 1, mRNA [NM_145803]      |
| A_24_P221960   | 0,004241401 | up   | 1,5536567  | TRAM1        | Homo sapiens clone FLB4941 PRO1292 mRNA, complete cds. [AF130055]                                                               |
| A_23_P18518    | 0,020910984 | down | -1,7587408 | TRAM1L1      | Homo sapiens translocation associated membrane protein 1-like 1 (TRAM1L1), mRNA [NM_152402]                                     |
| A_21_P0012437  | 0,014673613 | down | -2,0315356 | TRANK1       | Homo sapiens tetratricopeptide repeat and ankyrin repeat containing 1 (TRANK1), mRNA [NM_014831]                                |
| A_21_P0012439  | 0,030678118 | down | -2,3466284 | TRANK1       | Homo sapiens tetratricopeptide repeat and ankyrin repeat containing 1 (TRANK1), mRNA [NM_014831]                                |
| A_33_P3312534  | 0,004241541 | up   | 1,7213973  | TRAPPC10     | trafficking protein particle complex 10 [Source:HGNC Symbol;Acc:HGNC:11868] [ENST00000459741]                                   |
| A_23_P317683   | 0,001508911 | up   | 1,6215832  | TRAPPC10     | Homo sapiens trafficking protein particle complex 10 (TRAPPC10), mRNA [NM_003274]                                               |
| A_24_P390928   | 8,41E-04    | down | -1,7741452 | TRAPPC6A     | Homo sapiens trafficking protein particle complex 6A (TRAPPC6A), transcript variant 1, mRNA [NM_024108]                         |
| A_33_P3248799  | 0,005196196 | up   | 1,5957714  | TRDN         | Homo sapiens triadin (TRDN), transcript variant 5, mRNA [NM_001256022]                                                          |
| A_24_P214858   | 0,023271663 | down | -2,015562  | TREML2       | Homo sapiens triggering receptor expressed on myeloid cells-like 2 (TREML2), mRNA [NM_024807]                                   |
| A_23_P366983   | 0,015014595 | up   | 1,6568924  | TRHDE        | Homo sapiens thyrotropin-releasing hormone degrading enzyme (TRHDE), mRNA [NM_013381]                                           |
| A_21_P0007724  | 6,75E-04    | down | -3,1847854 | TRHDE-AS1    | Homo sapiens TRHDE antisense RNA 1 (TRHDE-AS1), transcript variant 1, long non-coding RNA [NR_026837]                           |
| A_23_P322008   | 4,00E-06    | down | -5,4685993 | TRHR         | Homo sapiens thyrotropin-releasing hormone receptor (TRHR), mRNA [NM_003301]                                                    |
| A_24_P396753   | 0,033382367 | up   | 1,723587   | TRIB2        | Homo sapiens tribbles pseudokinase 2 (TRIB2), transcript variant 1, mRNA [NM_021643]                                            |
| A_24_P183664   | 0,045273438 | down | -1,6765625 | TRIL         | Homo sapiens TLR4 interactor with leucine-rich repeats (TRIL), mRNA [NM_014817]                                                 |
| A_23_P420831   | 0,01003106  | down | -2,133173  | TRIM10       | Homo sapiens tripartite motif containing 10 (TRIM10), transcript variant 2, mRNA [NM_052828]                                    |
| A_33_P3220182  | 0,030000616 | up   | 2,1528053  | TRIM15       | Homo sapiens tripartite motif containing 15 (TRIM15), mRNA [NM_033229]                                                          |
| A_33_P3416687  | 8,76E-04    | down | -1,6415433 | TRIM16       | tripartite motif containing 16 [Source:HGNC Symbol;Acc:HGNC:17241] [ENST00000582708]                                            |
| A_23_P129903   | 0,043309964 | up   | 1,8024665  | TRIM16L      | Homo sapiens tripartite motif containing 16-like (TRIM16L), mRNA [NM_001037330]                                                 |
| A_24_P208998   | 0,015597605 | down | -2,2018561 | TRIM23       | Homo sapiens tripartite motif containing 23 (TRIM23), transcript variant alpha, mRNA [NM_001656]                                |
| A_33_P3554318  | 0,015171251 | down | -1,7237769 | TRIM3        | Homo sapiens tripartite motif containing 3 (TRIM3), transcript variant 1, mRNA [NM_006458]                                      |
| A_23_P21230    | 0,014120425 | up   | 1,5009241  | TRIM37       | Homo sapiens tripartite motif containing 37 (TRIM37), transcript variant 1, mRNA [NM_015294]                                    |
| A_23_P402778   | 0,047338862 | up   | 2,4589398  | TRIM40       | Homo sapiens tripartite motif containing 40 (TRIM40), transcript variant 2, mRNA [NM_138700]                                    |
| A_33_P3474250  | 0,036595564 | down | -1,875239  | TRIM44       | tripartite motif containing 44 [Source:HGNC Symbol;Acc:HGNC:19016] [ENST00000299413]                                            |
| A_21_P0011007  | 0,0492507   | up   | 2,0068953  | TRIM49B      | Homo sapiens tripartite motif containing 49B (TRIM49B), mRNA [NM_001206626]                                                     |
| A_33_P3374970  | 0,007084501 | up   | 1,590926   | TRIM49D1     | Homo sapiens tripartite motif containing 49D1 (TRIM49D1), mRNA [NM_001206627]                                                   |
| A_23_P150483   | 0,027224904 | up   | 1,675102   | TRIM51       | Homo sapiens tripartite motif-containing 51 (TRIM51), mRNA [NM_032681]                                                          |
| A_33_P3374971  | 0,003119896 | down | -2,6283765 | TRIM53AP     | Homo sapiens tripartite motif containing 53A, pseudogene (TRIM53AP), non-coding RNA [NR_028346]                                 |
| A_33_P3271594  | 0,001579506 | down | -2,9134753 | TRIM54       | Homo sapiens tripartite motif containing 54 (TRIM54), transcript variant 1, mRNA [NM_032546]                                    |
| A_23_P123402   | 0,031334672 | up   | 2,1835043  | TRIM55       | Homo sapiens tripartite motif containing 55 (TRIM55), transcript variant 3, mRNA [NM_184086]                                    |
| A_33_P3249414  | 0,004316633 | down | -2,6341598 | TRIM58       | Homo sapiens tripartite motif containing 58 (TRIM58), mRNA [NM_015431]                                                          |
| A_33_P3220247  | 3,73E-06    | down | -6,03542   | TRIM6        | Homo sapiens tripartite motif containing 6 (TRIM6), transcript variant 1, mRNA [NM_001003818]                                   |
| A_24_P213120   | 0,01070547  | up   | 1,6140071  | TRIM64       | Homo sapiens tripartite motif containing 64 (TRIM64), mRNA [NM_001136486]                                                       |
| A_19_P00804979 | 0,001159481 | down | -2,5883381 | TRIM66       | PREDICTED: Homo sapiens tripartite motif containing 66 (TRIM66), transcript variant X1, mRNA [XM_006718397]                     |
| A_33_P3383994  | 0,001695942 | down | -2,4246817 | TRIM67       | Homo sapiens tripartite motif containing 67 (TRIM67), transcript variant 1, mRNA [NM_001004342]                                 |
| A_23_P48826    | 0,001364796 | down | -1,9031575 | TRIM69       | Homo sapiens tripartite motif containing 69 (TRIM69), transcript variant a, mRNA [NM_182985]                                    |
| A_24_P369656   | 0,013315111 | up   | 1,5092518  | TRIM9        | Homo sapiens tripartite motif containing 9 (TRIM9), transcript variant 2, mRNA [NM_052978]                                      |
| A_33_P3415500  | 0,004081265 | up   | 1,9143429  | TRIO         | trio Rho guanine nucleotide exchange factor [Source:HGNC Symbol;Acc:HGNC:12303] [ENST00000620511]                               |
| A_33_P3325753  | 0,002644982 | up   | 1,8699697  | TRIOBP       | Homo sapiens TRIO and F-actin binding protein (TRIOBP), transcript variant 6, mRNA [NM_001039141]                               |
| A_23_P50349    | 0,006728314 | up   | 1,6539199  | TRIP10       | Homo sapiens thyroid hormone receptor interactor 10 (TRIP10), transcript variant 2, mRNA [NM_004240]                            |
| A_33_P3281363  | 0,001101003 | up   | 1,7036574  | TRIP12       | Homo sapiens thyroid hormone receptor interactor 12, mRNA (cDNA clone IMAGE:5742743), with apparent retained intron. [BC037956] |
| A_23_P147984   | 0,001986707 | up   | 1,5636333  | TRIP12       | Homo sapiens thyroid hormone receptor interactor 12 (TRIP12), transcript variant 3, mRNA [NM_004238]                            |
| A_33_P3370310  | 0,003721422 | down | -1,7966144 | TRIQK        | Homo sapiens triple QxxK/R motif containing (TRIQK), transcript variant 1, mRNA [NM_001171796]                                  |
| A_33_P3214204  | 0,004737932 | up   | 2,3468478  | TRIQK        | Homo sapiens clone FLB3344 PRO0845 mRNA, complete cds. [AF130048]                                                               |
| A_23_P16683    | 0,017194174 | up   | 1,5172882  | TRMT1        | Homo sapiens tRNA methyltransferase 1 homolog (S. cerevisiae) (TRMT1), transcript variant 1, mRNA [NM_017722]                   |

|               |                  |                    |                                                                                                                                      |
|---------------|------------------|--------------------|--------------------------------------------------------------------------------------------------------------------------------------|
| A_23_P400459  | 0,016816825 up   | 1,6044319 TRMT10B  | Homo sapiens tRNA methyltransferase 10 homolog B (S. cerevisiae) (TRMT10B), transcript variant 1, mRNA [NM_144964]                   |
| A_33_P3225567 | 6,27E-04 down    | -2,1963825 TRMT2B  | Homo sapiens tRNA methyltransferase 2 homolog B (S. cerevisiae) (TRMT2B), transcript variant 1, mRNA [NM_024917]                     |
| A_33_P3238976 | 8,97E-04 down    | -1,5664033 TRMT5   | Homo sapiens tRNA methyltransferase 5 (TRMT5), mRNA [NM_020810]                                                                      |
| A_24_P373126  | 1,05E-04 down    | -2,2577674 TRMT61A | Homo sapiens tRNA methyltransferase 61A (TRMT61A), mRNA [NM_152307]                                                                  |
| A_24_P734953  | 9,11E-06 up      | 3,6274762 TRNP1    | Homo sapiens TMF1-regulated nuclear protein 1 (TRNP1), mRNA [NM_001013642]                                                           |
| A_33_P3237874 | 0,037012126 down | -1,7043241 TROAP   | Homo sapiens trophinin associated protein (TROAP), transcript variant 2, mRNA [NM_001100620]                                         |
| A_33_P3250394 | 0,001867106 down | -1,7140377 TRPC2   | transient receptor potential cation channel, subfamily C, member 2, pseudogene [Source:HGNC Symbol;Acc:HGNC:12334] [ENST00000451043] |
| A_23_P105873  | 0,046042353 up   | 1,5677065 TRPC4    | Homo sapiens transient receptor potential cation channel, subfamily C, member 4 (TRPC4), transcript variant alpha, mRNA [NM_016179]  |
| A_33_P3337627 | 0,004666292 down | -2,5219722 TRPC6   | Homo sapiens transient receptor potential cation channel, subfamily C, member 6 (TRPC6), mRNA [NM_004621]                            |
| A_33_P3337632 | 0,001983322 up   | 2,7272894 TRPC7    | Homo sapiens transient receptor potential cation channel, subfamily C, member 7 (TRPC7), transcript variant 1, mRNA [NM_020389]      |
| A_23_P114061  | 0,047582816 down | -1,5848554 TRPM3   | Homo sapiens transient receptor potential cation channel, subfamily M, member 3 (TRPM3), transcript variant 9, mRNA [NM_001007471]   |
| A_23_P87279   | 0,001039487 down | 4,6887093 TRPM5    | Homo sapiens transient receptor potential cation channel, subfamily M, member 5 (TRPM5), mRNA [NM_014555]                            |
| A_24_P32692   | 0,017477417 up   | 2,5492985 TRPM6    | Homo sapiens transient receptor potential cation channel, subfamily M, member 6 (TRPM6), transcript variant a, mRNA [NM_017662]      |
| A_33_P3317327 | 0,016293019 up   | 2,8130136 TRPM8    | transient receptor potential cation channel, subfamily M, member 8 [Source:HGNC Symbol;Acc:HGNC:17961] [ENST00000355722]             |
| A_23_P94053   | 0,004264571 up   | 1,5132822 TRRAP    | Homo sapiens transformation/transcription domain-associated protein (TRRAP), transcript variant 2, mRNA [NM_003496]                  |
| A_32_P41553   | 0,011646858 down | -1,5654534 TSACC   | Homo sapiens TSSK6 activating co-chaperone (TSACC), mRNA [NM_144627]                                                                 |
| A_33_P3281686 | 0,005496321 down | -1,6911077 TSC2    | Homo sapiens tuberous sclerosis 2 (TSC2), transcript variant 4, mRNA [NM_001077183]                                                  |
| A_23_P92230   | 0,002020946 up   | 2,097018 TSC22D2   | Homo sapiens TSC22 domain family, member 2 (TSC22D2), transcript variant 1, mRNA [NM_014779]                                         |
| A_21_P0003042 | 0,01859077 up    | 2,0143878 TSC22D2  | TSC22 domain family, member 2 [Source:HGNC Symbol;Acc:HGNC:29095] [ENST00000361875]                                                  |
| A_23_P12128   | 0,007648613 down | -1,759504 TSHB     | Homo sapiens thyroid stimulating hormone, beta (TSHB), transcript variant 1, mRNA [NM_000549]                                        |
| A_33_P3247753 | 0,014831217 down | -1,5778465 TSIX    | Homo sapiens TSIX transcript, XIST antisense RNA (TSIX), antisense RNA [NR_003255]                                                   |
| A_33_P3297126 | 0,008393668 down | -2,0750074 TSNARE1 | Homo sapiens t-SNARE domain containing 1 (TSNARE1), transcript variant 1, mRNA [NM_145003]                                           |
| A_33_P3291567 | 0,001669911 down | -2,6131365 TSNARE1 | Homo sapiens t-SNARE domain containing 1 (TSNARE1), transcript variant 1, mRNA [NM_145003]                                           |
| A_24_P213643  | 3,04E-04 down    | -2,9417005 TSPAN10 | Homo sapiens tetraspanin 10 (TSPAN10), transcript variant 2, mRNA [NM_031945]                                                        |
| A_24_P135483  | 0,004494168 up   | 1,7898215 TSPAN14  | Homo sapiens tetraspanin 14 (TSPAN14), transcript variant 1, mRNA [NM_030927]                                                        |
| A_24_P98613   | 0,001118244 up   | 1,6642308 TSPAN14  | Homo sapiens tetraspanin 14 (TSPAN14), transcript variant 1, mRNA [NM_030927]                                                        |
| A_23_P142070  | 0,042859383 up   | 2,1588383 TSPAN16  | Homo sapiens tetraspanin 16 (TSPAN16), transcript variant 1, mRNA [NM_012466]                                                        |
| A_24_P13083   | 0,008062377 up   | 2,6586716 TSPAN18  | Homo sapiens tetraspanin 18 (TSPAN18), mRNA [NM_130783]                                                                              |
| A_23_P316741  | 0,02459322 up    | 1,6268053 TSPAN4   | Homo sapiens tetraspanin 4 (TSPAN4), transcript variant 1, mRNA [NM_001025237]                                                       |
| A_33_P3234222 | 0,001329873 down | -1,7440497 TSPO2   | Homo sapiens translocator protein 2 (TSPO2), transcript variant 1, mRNA [NM_001010873]                                               |
| A_33_P3353846 | 0,014104866 down | -2,2450576 TSPO2   | Homo sapiens translocator protein 2 (TSPO2), transcript variant 1, mRNA [NM_001010873]                                               |
| A_23_P110882  | 0,005459722 up   | 1,5258228 TSPYL4   | Homo sapiens TSPY-like 4 (TSPYL4), mRNA [NM_021648]                                                                                  |
| A_23_P91035   | 0,038442124 up   | 1,8312553 TSPYL6   | Homo sapiens TSPY-like 6 (TSPYL6), mRNA [NM_001003937]                                                                               |
| A_21_P0014764 | 0,039688963 up   | 2,8415434 TSRM     | Homo sapiens zinc finger domain-related protein TSRM (TSRM) mRNA, partial cds. [AY742823]                                            |
| A_23_P108221  | 0,035734188 down | -1,537267 TSSK6    | Homo sapiens testis-specific serine kinase 6 (TSSK6), mRNA [NM_032037]                                                               |
| A_33_P3392374 | 0,010447417 up   | 2,6641047 TTBK1    | Homo sapiens tau tubulin kinase 1 (TTBK1), mRNA [NM_032538]                                                                          |
| A_23_P103864  | 6,26E-04 up      | 1,7566435 TTC13    | Homo sapiens tetratricopeptide repeat domain 13 (TTC13), transcript variant 1, mRNA [NM_024525]                                      |
| A_24_P11436   | 0,042666562 down | -1,5908494 TTC22   | Homo sapiens tetratricopeptide repeat domain 22 (TTC22), transcript variant 2, mRNA [NM_017904]                                      |
| A_23_P390726  | 0,010854059 down | -1,716021 TTC23L   | Homo sapiens tetratricopeptide repeat domain 23-like (TTC23L), mRNA [NM_144725]                                                      |
| A_33_P3297345 | 0,016989125 down | -2,236209 TTC24    | Homo sapiens tetratricopeptide repeat domain 24 (TTC24), mRNA [NM_001105669]                                                         |
| A_24_P17453   | 0,002689734 down | -3,0651875 TTC30A  | Homo sapiens tetratricopeptide repeat domain 30A (TTC30A), mRNA [NM_152275]                                                          |
| A_21_P0000586 | 0,002894922 down | -2,3651474 TTC3P1  | Homo sapiens tetratricopeptide repeat domain 3 pseudogene 1 (TTC3P1), non-coding RNA [NR_030737]                                     |
| A_24_P337000  | 0,003932091 up   | 1,6846331 TTC7A    | Homo sapiens tetratricopeptide repeat domain 7A (TTC7A), transcript variant 2, mRNA [NM_020458]                                      |
| A_24_P273742  | 0,028610297 up   | 2,2197688 TTC9     | Homo sapiens tetratricopeptide repeat domain 9 (TTC9), mRNA [NM_015351]                                                              |
| A_33_P3293593 | 0,021189176 down | -2,2098453 TTC9B   | Homo sapiens tetratricopeptide repeat domain 9B (TTC9B), mRNA [NM_152479]                                                            |
| A_33_P3324655 | 0,021874966 up   | 1,5428953 TTL2     | Homo sapiens TELO2 interacting protein 2 (TTL2), transcript variant 2, mRNA [NM_025115]                                              |
| A_24_P165545  | 0,012925072 up   | 2,635343 TTL10     | Homo sapiens tubulin tyrosine ligase-like family member 10 (TLL10), transcript variant 2, mRNA [NM_153254]                           |
| A_33_P3237250 | 6,41E-04 down    | -2,1258204 TTL13P  | Homo sapiens tubulin tyrosine ligase-like family member 13, pseudogene (TLL13P), non-coding RNA [NR_104604]                          |
| A_23_P7901    | 0,002748334 up   | 1,7775527 TTL2     | Homo sapiens tubulin tyrosine ligase-like family member 2 (TLL2), mRNA [NM_031949]                                                   |
| A_33_P3263387 | 0,00381175 down  | -1,5321544 TTL4    | Homo sapiens tubulin tyrosine ligase-like family member 4 (TLL4), mRNA [NM_014640]                                                   |
| A_33_P3410060 | 0,003339526 up   | 1,5238185 TTL6     | tubulin tyrosine ligase-like family, member 6 [Source:HGNC Symbol;Acc:HGNC:26664] [ENST00000376681]                                  |
| A_21_P0014021 | 4,84E-04 down    | -3,3383427 TTL8    | PREDICTED: Homo sapiens tubulin tyrosine ligase-like family, member 8 (TLL8), mRNA [XM_003403494]                                    |
| A_33_P3398000 | 0,001147532 down | -1,7442329 TTN-AS1 | Homo sapiens TTN antisense RNA 1 (TTN-AS1), transcript variant 1, long non-coding RNA [NR_038272]                                    |
| A_24_P323131  | 0,008290255 up   | 1,7419257 TTTY1    | Homo sapiens testis-specific transcript, Y-linked 1 (non-protein coding) (TTY1), long non-coding RNA [NR_001538]                     |
| A_23_P160017  | 0,00703573 up    | 3,260865 TTTY11    | Homo sapiens testis-specific transcript, Y-linked 11 (non-protein coding) (TTY11), long non-coding RNA [NR_001548]                   |
| A_23_P111397  | 0,001886736 down | -2,099413 TTTY13   | Homo sapiens testis-specific transcript, Y-linked 13 (non-protein coding) (TTY13), long non-coding RNA [NR_001537]                   |
| A_21_P0013906 | 0,005851587 up   | 1,6556604 TTTY14   | testis-specific transcript, Y-linked 14 (non-protein coding) [Source:HGNC Symbol;Acc:HGNC:18495] [ENST00000447937]                   |
| A_33_P3349495 | 0,017719604 down | -2,217408 TTTY16   | Homo sapiens testis-specific transcript, Y-linked 16 (non-protein coding) (TTY16), long non-coding RNA [NR_001552]                   |
| A_24_P186114  | 0,005110478 up   | 1,9961617 TTTY21   | Homo sapiens testis-specific transcript, Y-linked 21 (non-protein coding) (TTY21), long non-coding RNA [NR_001535]                   |
| A_23_P34209   | 0,034288146 up   | 1,9781096 TTTY5    | Homo sapiens testis-specific transcript, Y-linked 5 (non-protein coding) (TTY5), long non-coding RNA [NR_001541]                     |
| A_32_P737629  | 0,007357933 up   | 1,5271895 TTTY7    | Homo sapiens testis-specific transcript, Y-linked 7 (non-protein coding) (TTY7), long non-coding RNA [NR_001534]                     |

|                |                  |            |              |                                                                                                                                             |
|----------------|------------------|------------|--------------|---------------------------------------------------------------------------------------------------------------------------------------------|
| A_23_P45592    | 0,012408071 up   | 1,7974554  | TTY8         | Homo sapiens testis-specific transcript, Y-linked 8 (non-protein coding) (TTY8), long non-coding RNA [NR_001533]                            |
| A_23_P500892   | 0,03667949 up    | 1,5189434  | TUB          | Homo sapiens tubby bipartite transcription factor (TUB), transcript variant 1, mRNA [NM_003320]                                             |
| A_23_P128598   | 0,013723782 down | -1,6272969 | TUBA3C       | Homo sapiens tubulin, alpha 3c (TUBA3C), mRNA [NM_006001]                                                                                   |
| A_23_P56736    | 0,002231384 down | -2,3615854 | TUBA3D       | Homo sapiens tubulin, alpha 3d (TUBA3D), mRNA [NM_080386]                                                                                   |
| A_24_P228550   | 0,014226709 up   | 2,1233552  | TUBB1        | Homo sapiens tubulin, beta 1 class VI (TUBB1), mRNA [NM_030773]                                                                             |
| A_23_P113665   | 0,007158907 down | -3,7590454 | TUBB4A       | Homo sapiens tubulin, beta 4A class IVa (TUBB4A), transcript variant 3, mRNA [NM_006087]                                                    |
| A_23_P26895    | 0,040667567 up   | 1,527745   | TUBD1        | Homo sapiens tubulin, delta 1 (TUBD1), transcript variant 1, mRNA [NM_016261]                                                               |
| A_23_P382045   | 0,009456533 up   | 1,6167277  | TULP4        | Homo sapiens tubby like protein 4 (TULP4), transcript variant 1, mRNA [NM_020245]                                                           |
| A_33_P3416171  | 0,010030719 down | -1,9001739 | TUNAR        | TCL1 upstream neural differentiation-associated RNA [Source:HGNC Symbol;Acc:HGNC:44088] [ENST00000554321]                                   |
| A_32_P133884   | 0,011149406 up   | 1,5486851  | TUSC1        | Homo sapiens tumor suppressor candidate 1 (TUSC1), mRNA [NM_001004125]                                                                      |
| A_33_P3354574  | 0,002576389 down | -1,6873969 | TUSC8        | tumor suppressor candidate 8 (non-protein coding) [Source:HGNC Symbol;Acc:HGNC:49111] [ENST00000607312]                                     |
| A_24_P262321   | 0,006148286 down | -2,1817665 | TVP23C-CDRT4 | Homo sapiens TVP23C-CDRT4 readthrough (TVP23C-CDRT4), transcript variant 1, mRNA [NM_001204478]                                             |
| A_19_P00322910 | 0,003467158 down | -3,3201532 | TWIST2       | Homo sapiens twist family bHLH transcription factor 2 (TWIST2), transcript variant 2, mRNA [NM_057179]                                      |
| A_24_P202497   | 0,005055445 down | -2,0545456 | TWSG1        | Homo sapiens twisted gastrulation BMP signaling modulator 1 (TWSG1), mRNA [NM_020648]                                                       |
| A_33_P3270451  | 0,007465159 down | -1,6159441 | TXNDC5       | Homo sapiens thioredoxin domain containing 5 (endoplasmic reticulum) (TXNDC5), transcript variant 1, mRNA [NM_030810]                       |
| A_33_P3278275  | 0,004950892 up   | 1,882938   | TXNDC8       | thioredoxin domain containing 8 (spermatozoa) [Source:HGNC Symbol;Acc:HGNC:31454] [ENST00000374511]                                         |
| A_23_P97700    | 0,004463571 up   | 2,597031   | TXNIP        | Homo sapiens thioredoxin interacting protein (TXNIP), mRNA [NM_006472]                                                                      |
| A_33_P3344956  | 0,013020637 down | -4,954335  | TXNL1        | thioredoxin-like 1 [Source:HGNC Symbol;Acc:HGNC:12436] [ENST00000587807]                                                                    |
| A_33_P3351120  | 0,014809366 down | -1,555605  | TXNRD1       | Homo sapiens thioredoxin reductase 1 (TXNRD1), transcript variant 6, mRNA [NM_001261445]                                                    |
| A_33_P3374504  | 0,017620482 down | -1,5618143 | TXNRD2       | Homo sapiens thioredoxin reductase 2 (TXNRD2), transcript variant 2, mRNA [NM_001282512]                                                    |
| A_33_P3255949  | 3,06E-05 down    | -3,012885  | TYMP         | Homo sapiens thymidine phosphorylase (TYMP), transcript variant 3, mRNA [NM_001113756]                                                      |
| A_33_P3409062  | 0,011818289 down | -1,846496  | TYROBP       | Homo sapiens TYRO protein tyrosine kinase binding protein (TYROBP), transcript variant 1, mRNA [NM_003332]                                  |
| A_23_P94403    | 0,006477221 up   | 1,5475277  | TYRP1        | Homo sapiens tyrosinase-related protein 1 (TYRP1), mRNA [NM_000550]                                                                         |
| A_24_P943106   | 0,003582841 up   | 1,601863   | U2SURP       | Homo sapiens U2 snRNP-associated SURP domain containing (U2SURP), mRNA [NM_001080415]                                                       |
| A_23_P160460   | 1,91E-04 up      | 1,6751441  | UAP1         | Homo sapiens UDP-N-acetylglucosamine pyrophosphorylase 1 (UAP1), mRNA [NM_003115]                                                           |
| A_19_P00319376 | 7,56E-04 down    | -1,8988212 | UBA6-AS1     | Homo sapiens UBA6 antisense RNA 1 (head to head) (UBA6-AS1), long non-coding RNA [NR_015439]                                                |
| A_19_P00321263 | 0,042639904 down | -1,5306804 | UBA6-AS1     | Homo sapiens UBA6 antisense RNA 1 (head to head) (UBA6-AS1), long non-coding RNA [NR_015439]                                                |
| A_21_P0000659  | 0,026447304 down | -1,7114892 | UBAC2-AS1    | Homo sapiens UBAC2 antisense RNA 1 (UBAC2-AS1), transcript variant 1, long non-coding RNA [NR_036531]                                       |
| A_23_P123866   | 0,004610841 up   | 1,5552936  | UBAP1        | Homo sapiens ubiquitin associated protein 1 (UBAP1), transcript variant 1, mRNA [NM_016525]                                                 |
| A_23_P60472    | 0,001226355 up   | 1,6082758  | UBAP2        | Homo sapiens ubiquitin associated protein 2 (UBAP2), transcript variant 1, mRNA [NM_018449]                                                 |
| A_33_P3385909  | 0,017131442 up   | 2,1340492  | UBASH3A      | Homo sapiens ubiquitin associated and SH3 domain containing A (UBASH3A), transcript variant 3, mRNA [NM_001243467]                          |
| A_23_P58293    | 0,007146007 up   | 2,0103192  | UBE2D3       | Homo sapiens ubiquitin-conjugating enzyme E2D 3 (UBE2D3), transcript variant 2, mRNA [NM_181886]                                            |
| A_23_P367071   | 3,09E-07 down    | -6,9892755 | UBE2DNL      | Homo sapiens ubiquitin-conjugating enzyme E2D N-terminal like (pseudogene) (UBE2DNL), non-coding RNA [NR_024062]                            |
| A_19_P00323103 | 0,007473184 up   | 1,5065261  | UBE2E3       | ubiquitin-conjugating enzyme E2E 3 [Source:HGNC Symbol;Acc:HGNC:12479] [ENST00000602837]                                                    |
| A_23_P145584   | 0,02731575 up    | 1,7043353  | UBE2H        | Homo sapiens ubiquitin-conjugating enzyme E2H (UBE2H), transcript variant 1, mRNA [NM_003344]                                               |
| A_33_P3341234  | 0,001433521 up   | 1,936827   | UBE2H        | Homo sapiens ubiquitin-conjugating enzyme E2H (UBE2H), transcript variant 1, mRNA [NM_003344]                                               |
| A_23_P141847   | 0,005339312 up   | 1,5948155  | UBE2M        | Homo sapiens ubiquitin-conjugating enzyme E2M (UBE2M), mRNA [NM_003969]                                                                     |
| A_23_P116829   | 0,007356992 up   | 1,8320801  | UBE2N        | Homo sapiens ubiquitin-conjugating enzyme E2N (UBE2N), mRNA [NM_003348]                                                                     |
| A_33_P3342992  | 0,031191131 up   | 1,6651679  | UBE2Q2P2     | Homo sapiens ubiquitin-conjugating enzyme E2Q family member 2 pseudogene 2 (UBE2Q2P2), non-coding RNA [NR_004847]                           |
| A_24_P479551   | 0,022137523 up   | 1,6183347  | UBE2QL1      | Homo sapiens ubiquitin-conjugating enzyme E2Q family-like 1 (UBE2QL1), mRNA [NM_001145161]                                                  |
| A_33_P3333820  | 0,005024214 up   | 1,6990418  | UBE2R2       | Homo sapiens ubiquitin-conjugating enzyme E2R 2 (UBE2R2), mRNA [NM_017811]                                                                  |
| A_24_P207150   | 0,001401988 up   | 1,5912294  | UBE3A        | Homo sapiens ubiquitin protein ligase E3A (UBE3A), transcript variant 3, mRNA [NM_130839]                                                   |
| A_33_P3379581  | 0,017841863 up   | 2,337463   | UBR2         | Homo sapiens ubiquitin protein ligase E3 component n-recognin 2 (UBR2), transcript variant 2, mRNA [NM_001184801]                           |
| A_32_P159400   | 0,012663381 down | -1,5615935 | UBR5         | Homo sapiens ubiquitin protein ligase E3 component n-recognin 5 (UBR5), transcript variant 1, mRNA [NM_015902]                              |
| A_33_P3220565  | 0,014146178 up   | 1,5286041  | UBTD2        | Homo sapiens ubiquitin domain containing 2 (UBTD2), mRNA [NM_152277]                                                                        |
| A_33_P3292588  | 0,007643314 up   | 2,1416574  | UBTFL1       | Homo sapiens upstream binding transcription factor, RNA polymerase I-like 1 (UBTFL1), mRNA [NM_001143975]                                   |
| A_33_P3303982  | 0,001065236 up   | 2,4934702  | UBTFL1       | Homo sapiens upstream binding transcription factor, RNA polymerase I-like 1 (UBTFL1), mRNA [NM_001143975]                                   |
| A_33_P3394031  | 8,45E-04 down    | -2,6057696 | UBXN11       | Homo sapiens UBX domain protein 11 (UBXN11), transcript variant 2, mRNA [NM_183008]                                                         |
| A_33_P3248272  | 0,003770055 up   | 1,5690677  | UBXN8        | Homo sapiens UBX domain protein 8 (UBXN8), transcript variant 1, mRNA [NM_005671]                                                           |
| A_24_P292470   | 5,48E-05 down    | -2,8343463 | UCP3         | Homo sapiens uncoupling protein 3 (mitochondrial, proton carrier) (UCP3), transcript variant short, mRNA [NM_022803]                        |
| A_23_P313389   | 0,023244418 up   | 1,6035728  | UGCG         | Homo sapiens UDP-glucose ceramide glucosyltransferase (UGCG), mRNA [NM_003358]                                                              |
| A_33_P3396607  | 0,011649787 down | -1,6122608 | UGDH         | Homo sapiens UDP-glucose 6-dehydrogenase (UGDH), transcript variant 1, mRNA [NM_003359]                                                     |
| A_24_P44341    | 0,04534711 down  | -1,5584372 | UGGT2        | Homo sapiens UDP-glucose glycoprotein glucosyltransferase 2 (UGGT2), mRNA [NM_020121]                                                       |
| A_24_P334378   | 0,009087764 up   | 1,7854121  | UGT2A3       | Homo sapiens UDP glucuronosyltransferase 2 family, polypeptide A3 (UGT2A3), transcript variant 1, mRNA [NM_024743]                          |
| A_21_P0012591  | 0,003437565 down | -3,3251035 | UGT2B11      | Homo sapiens UDP glucuronosyltransferase 2 family, polypeptide B11 (UGT2B11), mRNA [NM_001073]                                              |
| A_33_P3424872  | 7,99E-04 up      | 2,9847493  | UGT2B28      | UDP glucuronosyltransferase 2 family, polypeptide B28 [Source:HGNC Symbol;Acc:HGNC:13479] [ENST00000612433]                                 |
| A_23_P122144   | 1,86E-05 down    | -2,5317526 | UGT3A1       | Homo sapiens UDP glucosyltransferase 3 family, polypeptide A1 (UGT3A1), transcript variant 1, mRNA [NM_152404]                              |
| A_23_P208880   | 0,005669687 up   | 1,7820604  | UHRF1        | Homo sapiens ubiquitin-like with PHD and ring finger domains 1 (UHRF1), transcript variant 2, mRNA [NM_013282]                              |
| A_24_P303815   | 0,0045696 up     | 1,8270242  | UHRF2        | Homo sapiens ubiquitin-like with PHD and ring finger domains 2, E3 ubiquitin protein ligase (UHRF2), transcript variant 1, mRNA [NM_152896] |
| A_33_P3422802  | 0,024498425 down | -2,1890485 | ULBP1        | Homo sapiens UL16 binding protein 1 (ULBP1), mRNA [NM_025218]                                                                               |
| A_23_P134100   | 3,60E-04 down    | -2,2354958 | ULBP3        | Homo sapiens UL16 binding protein 3 (ULBP3), mRNA [NM_024518]                                                                               |

|               |                  |                       |                                                                                                                              |
|---------------|------------------|-----------------------|------------------------------------------------------------------------------------------------------------------------------|
| A_24_P932594  | 0,017401619 up   | 2,071302 ULK2         | Homo sapiens unc-51 like autophagy activating kinase 2 (ULK2), transcript variant 1, mRNA [NM_014683]                        |
| A_23_P70998   | 0,002805721 down | -2,147136 UMAD1       | Homo sapiens UBAP1-MVB12-associated (UMA) domain containing 1 (UMAD1), transcript variant 3, mRNA [NM_001302350]             |
| A_33_P3271065 | 0,045505 down    | -2,179497 UMODL1      | Homo sapiens uromodulin-like 1 (UMODL1), transcript variant 3, mRNA [NM_001199527]                                           |
| A_33_P3355732 | 0,007455724 down | -2,297192 UMODL1      | uromodulin-like 1 [Source:HGNC Symbol;Acc:HGNC:12560] [ENST00000491559]                                                      |
| A_33_P3274478 | 5,76E-04 down    | -1,7238563 UNC119B    | Homo sapiens unc-119 homolog B (C. elegans) (UNC119B), mRNA [NM_001080533]                                                   |
| A_24_P472007  | 0,048384152 down | -1,9870551 UNC13A     | Homo sapiens unc-13 homolog A (C. elegans) (UNC13A), mRNA [NM_001080421]                                                     |
| A_33_P3318926 | 1,26E-04 down    | -2,0021248 UNC13B     | Homo sapiens unc-13 homolog B (C. elegans) (UNC13B), mRNA [NM_006377]                                                        |
| A_33_P3379001 | 0,002796473 down | -2,3254333 UNC5A      | Homo sapiens unc-5 homolog A (C. elegans) (UNC5A), mRNA [NM_133369]                                                          |
| A_33_P3374299 | 0,003661971 up   | 1,7649646 UNC5CL      | Homo sapiens unc-5 homolog C (C. elegans)-like (UNC5CL), mRNA [NM_173561]                                                    |
| A_23_P350808  | 0,019746076 up   | 1,6176647 UNC80       | unc-80 homolog (C. elegans) [Source:HGNC Symbol;Acc:HGNC:26582] [ENST00000489023]                                            |
| A_33_P3411388 | 2,14E-05 up      | 3,1173885 UNCX        | Homo sapiens UNC homeobox (UNCX), mRNA [NM_001080461]                                                                        |
| A_23_P100141  | 0,003387842 up   | 1,6115358 UNKL        | Homo sapiens unkempt family zinc finger-like (UNKL), transcript variant 1, mRNA [NM_001193388]                               |
| A_24_P194154  | 1,94E-04 up      | 1,6923257 UPF1        | Homo sapiens UPF1 regulator of nonsense transcripts homolog (yeast) (UPF1), transcript variant 2, mRNA [NM_002911]           |
| A_24_P65910   | 0,002141687 up   | 1,9697706 UQCC1       | Homo sapiens ubiquinol-cytochrome c reductase complex assembly factor 1 (UQCC1), transcript variant 1, mRNA [NM_018244]      |
| A_24_P66001   | 0,017661117 down | -1,7027557 UQCR10     | Homo sapiens ubiquinol-cytochrome c reductase, complex III subunit X (UQCR10), transcript variant 2, mRNA [NM_001003684]     |
| A_23_P118002  | 0,004981527 up   | 1,5581342 UQCRC2      | Homo sapiens ubiquinol-cytochrome c reductase core protein II (UQCRC2), mRNA [NM_003366]                                     |
| A_23_P74914   | 7,17E-04 up      | 1,9650215 URB2        | Homo sapiens URB2 ribosome biogenesis 2 homolog (S. cerevisiae) (URB2), mRNA [NM_014777]                                     |
| A_33_P3387666 | 0,018465134 up   | 1,865817 URM1         | Homo sapiens ubiquitin related modifier 1 (URM1), transcript variant 3, mRNA [NM_001265582]                                  |
| A_24_P366859  | 1,41E-05 down    | -6,901264 USHBP1      | Homo sapiens Usher syndrome 1C binding protein 1 (USHBP1), transcript variant 1, mRNA [NM_031941]                            |
| A_33_P3286980 | 0,015309117 up   | 1,9258333 USP17L1     | Homo sapiens ubiquitin specific peptidase 17-like family member 1 (USP17L1), mRNA [NM_001256873]                             |
| A_24_P272917  | 0,003182658 down | -1,7360724 USP17L25   | Homo sapiens ubiquitin specific peptidase 17-like family member 25 (USP17L25), mRNA [NM_001242326]                           |
| A_33_P3336242 | 6,47E-04 down    | -2,2228823 USP17L7    | Homo sapiens ubiquitin specific peptidase 17-like family member 7 (USP17L7), mRNA [NM_001256869]                             |
| A_33_P3342153 | 0,027630147 up   | 2,6452026 USP17L8     | Homo sapiens ubiquitin specific peptidase 17-like family member 8 (USP17L8), mRNA [NM_001256872]                             |
| A_23_P126689  | 0,004632648 up   | 1,5014036 USP21       | Homo sapiens ubiquitin specific peptidase 21 (USP21), transcript variant 3, mRNA [NM_001014443]                              |
| A_23_P422540  | 0,001872336 up   | 1,7214036 USP22       | Homo sapiens ubiquitin specific peptidase 22 (USP22), mRNA [NM_015276]                                                       |
| A_24_P58122   | 1,69E-04 up      | 1,9033366 USP24       | Homo sapiens ubiquitin specific peptidase 24 (USP24), mRNA [NM_015306]                                                       |
| A_32_P155826  | 0,001346855 down | -2,3668566 USP27X-AS1 | Homo sapiens USP27X antisense RNA 1 (head to head) (USP27X-AS1), long non-coding RNA [NR_026742]                             |
| A_21_P0000632 | 0,00421454 down  | -2,1433976 USP3-AS1   | Homo sapiens USP3 antisense RNA 1 (USP3-AS1), long non-coding RNA [NR_034080]                                                |
| A_24_P390583  | 0,03107343 up    | 1,6285976 USP31       | Homo sapiens ubiquitin specific peptidase 31 (USP31), mRNA [NM_020718]                                                       |
| A_24_P126417  | 4,70E-05 up      | 1,8979473 USP34       | Homo sapiens ubiquitin specific peptidase 34 (USP34), mRNA [NM_014709]                                                       |
| A_23_P116602  | 0,016516466 up   | 1,5119859 USP35       | Homo sapiens ubiquitin specific peptidase 35 (USP35), mRNA [NM_020798]                                                       |
| A_24_P310009  | 0,008582053 up   | 1,6179249 USP43       | Homo sapiens ubiquitin specific peptidase 43 (USP43), transcript variant 1, mRNA [NM_153210]                                 |
| A_33_P3862375 | 0,003922578 up   | 1,6951578 USP45       | Homo sapiens ubiquitin specific peptidase 45 (USP45), mRNA [NM_001080481]                                                    |
| A_24_P377225  | 0,001081587 up   | 1,7870636 USP46       | Homo sapiens ubiquitin specific peptidase 46 (USP46), transcript variant 1, mRNA [NM_022832]                                 |
| A_33_P3612740 | 0,008332185 up   | 1,5452555 USP48       | Homo sapiens ubiquitin specific peptidase 48 (USP48), transcript variant 2, mRNA [NM_001032730]                              |
| A_23_P331770  | 0,002900086 up   | 1,9706173 USP49       | Homo sapiens ubiquitin specific peptidase 49 (USP49), transcript variant 2, mRNA [NM_018561]                                 |
| A_33_P3301915 | 0,017260931 up   | 2,8908288 USP51       | Homo sapiens ubiquitin specific peptidase 51 (USP51), mRNA [NM_201286]                                                       |
| A_24_P137522  | 0,026947761 up   | 1,6993978 USP53       | Homo sapiens ubiquitin specific peptidase 53 (USP53), mRNA [NM_019050]                                                       |
| A_32_P128701  | 0,007937664 up   | 1,6993574 USP53       | Homo sapiens ubiquitin specific peptidase 53 (USP53), mRNA [NM_019050]                                                       |
| A_23_P129058  | 6,21E-04 up      | 1,650029 USP8         | Homo sapiens ubiquitin specific peptidase 8 (USP8), transcript variant 1, mRNA [NM_005154]                                   |
| A_33_P3294217 | 0,001803332 down | -1,842335 UTF1        | Homo sapiens undifferentiated embryonic cell transcription factor 1 (UTF1), mRNA [NM_003577]                                 |
| A_23_P205216  | 0,009640954 up   | 1,5163854 UTP14A      | Homo sapiens UTP14, U3 small nucleolar ribonucleoprotein, homolog A (yeast) (UTP14A), transcript variant 1, mRNA [NM_006649] |
| A_33_P3234864 | 0,04249241 down  | -1,7918518 UTRN       | Homo sapiens utrophin (UTRN), mRNA [NM_007124]                                                                               |
| A_33_P3234855 | 0,0287781 down   | -1,8489207 UTRN       | Homo sapiens utrophin (UTRN), mRNA [NM_007124]                                                                               |
| A_32_P225659  | 0,022013497 up   | 1,682456 UTS2B        | Homo sapiens urotensin 2B (UTS2B), mRNA [NM_198152]                                                                          |
| A_23_P146885  | 0,016075369 down | -2,2969403 UTS2R      | Homo sapiens urotensin 2 receptor (UTS2R), mRNA [NM_018949]                                                                  |
| A_33_P3287113 | 5,30E-04 down    | -1,916318 UVSSA       | UV-stimulated scaffold protein A [Source:HGNC Symbol;Acc:HGNC:29304] [ENST00000503548]                                       |
| A_23_P164341  | 0,006234164 down | -2,099671 VAMP2       | Homo sapiens vesicle-associated membrane protein 2 (synaptobrevin 2) (VAMP2), mRNA [NM_014232]                               |
| A_23_P129695  | 0,016147824 up   | 2,0484507 VASN        | Homo sapiens vasorin (VASN), mRNA [NM_138440]                                                                                |
| A_33_P3267562 | 0,002788119 down | -2,4548776 VAX2       | Homo sapiens ventral anterior homeobox 2 (VAX2), mRNA [NM_012476]                                                            |
| A_24_P47182   | 9,72E-04 up      | 1,8780044 VCL         | Homo sapiens vinculin (VCL), transcript variant 1, mRNA [NM_014000]                                                          |
| A_23_P70398   | 0,02748651 down  | -1,9479349 VEGFA      | Homo sapiens vascular endothelial growth factor A (VEGFA), transcript variant 6, mRNA [NM_001025370]                         |
| A_23_P380208  | 0,015180294 up   | 2,3050184 VEPH1       | Homo sapiens ventricular zone expressed PH domain-containing 1 (VEPH1), transcript variant 1, mRNA [NM_024621]               |
| A_23_P132763  | 0,031459384 up   | 2,2169728 VGLL3       | Homo sapiens vestigial-like family member 3 (VGLL3), mRNA [NM_016206]                                                        |
| A_23_P63096   | 0,001576257 down | -2,0122786 VHLL       | Homo sapiens von Hippel-Lindau tumor suppressor-like (VHLL), mRNA [NM_001004319]                                             |
| A_21_P0014785 | 0,009254421 down | -1,8108398 VIM-AS1    | Homo sapiens VIM antisense RNA 1 (VIM-AS1), transcript variant 1, long non-coding RNA [NR_108061]                            |
| A_23_P145978  | 0,001884015 down | -2,4131382 VIPR2      | Homo sapiens vasoactive intestinal peptide receptor 2 (VIPR2), mRNA [NM_003382]                                              |
| A_32_P153071  | 9,84E-04 down    | -3,0681288 VIPR2      | Homo sapiens vasoactive intestinal peptide receptor 2 (VIPR2), mRNA [NM_003382]                                              |
| A_33_P3284925 | 0,009023916 down | -1,6119398 VLDLR      | Homo sapiens very low density lipoprotein receptor (VLDLR), transcript variant 2, mRNA [NM_001018056]                        |
| A_23_P303238  | 0,028645065 down | -1,5161362 VN1R5      | Homo sapiens vomeronasal 1 receptor 5 (gene/pseudogene) (VN1R5), mRNA [NM_173858]                                            |
| A_23_P212595  | 0,008827776 up   | 1,5807784 VPRBP       | Homo sapiens Vpr (HIV-1) binding protein (VPRBP), transcript variant 1, mRNA [NM_014703]                                     |

|               |             |      |            |            |                                                                                                                       |
|---------------|-------------|------|------------|------------|-----------------------------------------------------------------------------------------------------------------------|
| A_33_P3401990 | 0,021329291 | down | -1,6188238 | VPREB3     | Homo sapiens pre-B lymphocyte 3 (VPREB3), mRNA [NM_013378]                                                            |
| A_23_P206228  | 0,009200818 | up   | 1,641588   | VPS13C     | Homo sapiens vacuolar protein sorting 13 homolog C (S. cerevisiae) (VPS13C), transcript variant 2A, mRNA [NM_020821]  |
| A_23_P23719   | 0,00786595  | up   | 1,5701491  | VPS45      | Homo sapiens vacuolar protein sorting 45 homolog (S. cerevisiae) (VPS45), transcript variant 1, mRNA [NM_007259]      |
| A_33_P3394352 | 0,004167734 | down | -1,8696234 | VPS53      | vacuolar protein sorting 53 homolog (S. cerevisiae) [Source:HGNC Symbol;Acc:HGNC:25608] [ENST00000541903]             |
| A_24_P147398  | 0,016786974 | down | -2,3346572 | VPS53      | Homo sapiens vacuolar protein sorting 53 homolog (S. cerevisiae) (VPS53), transcript variant 2, mRNA [NM_018289]      |
| A_24_P279489  | 0,009092806 | up   | 1,9188685  | VPS53      | Homo sapiens vacuolar protein sorting 53 homolog (S. cerevisiae) (VPS53), transcript variant 1, mRNA [NM_001128159]   |
| A_21_P0007894 | 3,74E-04    | down | -2,6905212 | VSIG10     | V-set and immunoglobulin domain containing 10 [Source:HGNC Symbol;Acc:HGNC:26078] [ENST00000321694]                   |
| A_21_P0007770 | 0,006290621 | down | -2,3764155 | VSIG10     | V-set and immunoglobulin domain containing 10 [Source:HGNC Symbol;Acc:HGNC:26078] [ENST00000321694]                   |
| A_33_P3250133 | 0,003801405 | up   | 1,8579229  | VSIG10     | Homo sapiens V-set and immunoglobulin domain containing 10 (VSIG10), mRNA [NM_019086]                                 |
| A_23_P72059   | 0,001493154 | up   | 2,0955324  | VSIG10     | Homo sapiens V-set and immunoglobulin domain containing 10 (VSIG10), mRNA [NM_019086]                                 |
| A_23_P217269  | 0,003074621 | down | -2,2050657 | VSIG4      | Homo sapiens V-set and immunoglobulin domain containing 4 (VSIG4), transcript variant 1, mRNA [NM_007268]             |
| A_23_P209978  | 0,035109587 | down | -1,7741818 | VSNL1      | Homo sapiens visinin-like 1 (VSNL1), mRNA [NM_003385]                                                                 |
| A_33_P3564487 | 0,025611885 | up   | 1,877773   | VSTM2A-OT1 | Homo sapiens VSTM2A overlapping transcript 1 (VSTM2A-OT1), long non-coding RNA [NR_038994]                            |
| A_23_P79803   | 0,002155611 | up   | 4,9266686  | VSTM2L     | Homo sapiens V-set and transmembrane domain containing 2 like (VSTM2L), mRNA [NM_080607]                              |
| A_24_P941038  | 0,004013105 | up   | 1,5043513  | VSTM4      | Homo sapiens V-set and transmembrane domain containing 4 (VSTM4), transcript variant 1, mRNA [NM_001031746]           |
| A_33_P3233189 | 0,045907967 | up   | 2,0857804  | VSTM5      | Homo sapiens V-set and transmembrane domain containing 5 (VSTM5), mRNA [NM_001144871]                                 |
| A_33_P3342295 | 2,34E-04    | down | -2,1988962 | VSX1       | Homo sapiens visual system homeobox 1 (VSX1), transcript variant 2, mRNA [NM_199425]                                  |
| A_33_P3305105 | 7,74E-04    | down | -1,99174   | VWA5A      | Homo sapiens von Willebrand factor A domain containing 5A (VWA5A), transcript variant 2, mRNA [NM_198315]             |
| A_33_P3405434 | 0,006484724 | down | -2,2374501 | VWA5B1     | von Willebrand factor A domain containing 5B1 [Source:HGNC Symbol;Acc:HGNC:26538] [ENST00000467486]                   |
| A_23_P42288   | 0,001980035 | down | -2,5435429 | VWA7       | Homo sapiens von Willebrand factor A domain containing 7 (VWA7), mRNA [NM_025258]                                     |
| A_33_P3211238 | 2,76E-05    | down | -2,057008  | VWCE       | Homo sapiens von Willebrand factor C and EGF domains (VWCE), mRNA [NM_152718]                                         |
| A_21_P0012280 | 0,005522945 | down | -1,8464898 | VWF        | Homo sapiens von Willebrand factor (VWF), mRNA [NM_000552]                                                            |
| A_23_P342185  | 7,64E-04    | up   | 1,6386156  | WAPAL      | Homo sapiens wings apart-like homolog (Drosophila) (WAPAL), mRNA [NM_015045]                                          |
| A_23_P65651   | 0,031222614 | down | -1,8876302 | WARS       | Homo sapiens tryptophanyl-tRNA synthetase (WARS), transcript variant 1, mRNA [NM_004184]                              |
| A_23_P96331   | 3,82E-05    | down | -5,3056407 | WAS        | Homo sapiens Wiskott-Aldrich syndrome (WAS), mRNA [NM_000377]                                                         |
| A_33_P3243812 | 2,72E-04    | down | -1,7595102 | WASF1      | Homo sapiens WAS protein family, member 1 (WASF1), transcript variant 1, mRNA [NM_003931]                             |
| A_33_P3337259 | 0,00258696  | down | -1,708374  | WASH5P     | Homo sapiens WAS protein family homolog 5 pseudogene (WASH5P), non-coding RNA [NR_033266]                             |
| A_23_P410128  | 3,70E-04    | up   | 2,2463613  | WBP2NL     | Homo sapiens WBP2 N-terminal like (WBP2NL), mRNA [NM_152613]                                                          |
| A_33_P3304878 | 0,018216906 | down | -2,722079  | WDFY4      | Homo sapiens WDFY family member 4 (WDFY4), mRNA [NM_020945]                                                           |
| A_32_P30905   | 0,048917517 | down | -1,7277943 | WDFY4      | Homo sapiens WDFY family member 4 (WDFY4), mRNA [NM_020945]                                                           |
| A_23_P90565   | 0,006377874 | down | -1,8791764 | WDPCP      | Homo sapiens WD repeat containing planar cell polarity effector (WDPCP), transcript variant 2, mRNA [NM_015910]       |
| A_21_P0011923 | 0,004116711 | down | -2,6893632 | WDPCP      | WD repeat containing planar cell polarity effector [Source:HGNC Symbol;Acc:HGNC:28027] [ENST00000467687]              |
| A_33_P3376404 | 0,011735487 | up   | 1,5299648  | WDR13      | Homo sapiens WD repeat domain 13 (WDR13), transcript variant 1, mRNA [NM_017883]                                      |
| A_33_P3375736 | 0,00537794  | up   | 1,9962615  | WDR17      | Homo sapiens WD repeat domain 17 (WDR17), transcript variant 1, mRNA [NM_170710]                                      |
| A_24_P184769  | 0,001114525 | up   | 1,6736794  | WDR20      | Homo sapiens WD repeat domain 20 (WDR20), transcript variant 1, mRNA [NM_181291]                                      |
| A_23_P84202   | 4,50E-05    | down | -3,5230105 | WDR25      | Homo sapiens WD repeat domain 25 (WDR25), transcript variant 1, mRNA [NM_024515]                                      |
| A_24_P36868   | 0,004081666 | up   | 1,7304237  | WDR26      | Homo sapiens WD repeat domain 26 (WDR26), transcript variant 1, mRNA [NM_025160]                                      |
| A_32_P449380  | 0,039086983 | down | -1,5353272 | WDR38      | Homo sapiens WD repeat domain 38 (WDR38), transcript variant 2, mRNA [NM_001045476]                                   |
| A_21_P0011593 | 0,002610374 | up   | 1,7681557  | WDR55      | WD repeat domain 55 [Source:HGNC Symbol;Acc:HGNC:25971] [ENST00000358337]                                             |
| A_23_P206856  | 9,04E-04    | up   | 1,5938821  | WDR59      | Homo sapiens WD repeat domain 59 (WDR59), mRNA [NM_030581]                                                            |
| A_23_P157361  | 0,013334332 | up   | 1,7446786  | WDR60      | Homo sapiens WD repeat domain 60 (WDR60), mRNA [NM_018051]                                                            |
| A_23_P422732  | 0,03216381  | down | -2,0809667 | WDR63      | Homo sapiens WD repeat domain 63 (WDR63), transcript variant 1, mRNA [NM_145172]                                      |
| A_33_P3388357 | 0,041100085 | down | -1,7873135 | WDR87      | Homo sapiens WD repeat domain 87 (WDR87), transcript variant 1, mRNA [NM_001291088]                                   |
| A_23_P374216  | 0,013736706 | up   | 1,5012302  | WFDC11     | Homo sapiens WAP four-disulfide core domain 11 (WFDC11), mRNA [NM_147197]                                             |
| A_24_P250507  | 0,032359894 | up   | 1,5343962  | WFDC13     | Homo sapiens WAP four-disulfide core domain 13 (WFDC13), mRNA [NM_172005]                                             |
| A_24_P307827  | 0,002068951 | up   | 1,6337994  | WHAMM      | Homo sapiens WAS protein homolog associated with actin, golgi membranes and microtubules (WHAMM), mRNA [NM_001080435] |
| A_33_P3423631 | 5,13E-04    | down | -1,8145674 | WHSC1      | Homo sapiens Wolf-Hirschhorn syndrome candidate 1 (WHSC1), transcript variant 8, mRNA [NM_007331]                     |
| A_23_P389919  | 0,001407249 | up   | 1,9050585  | WHSC1      | Homo sapiens Wolf-Hirschhorn syndrome candidate 1 (WHSC1), transcript variant 1, mRNA [NM_133330]                     |
| A_23_P136325  | 0,0024706   | up   | 1,5892291  | WIPF2      | Homo sapiens WAS/WASL interacting protein family, member 2 (WIPF2), mRNA [NM_133264]                                  |
| A_33_P3274299 | 0,046321683 | up   | 1,5223137  | WIPF3      | WAS/WASL interacting protein family, member 3 [Source:HGNC Symbol;Acc:HGNC:22004] [ENST00000409123]                   |
| A_24_P769359  | 5,43E-05    | up   | 1,9007136  | WNK1       | Homo sapiens WNK lysine deficient protein kinase 1 (WNK1), transcript variant 4, mRNA [NM_001184985]                  |
| A_23_P102117  | 0,04318896  | down | -1,8718952 | WNT10A     | Homo sapiens wingless-type MMTV integration site family, member 10A (WNT10A), mRNA [NM_025216]                        |
| A_23_P162322  | 0,001280028 | down | -3,2741096 | WNT10B     | Homo sapiens wingless-type MMTV integration site family, member 10B (WNT10B), mRNA [NM_003394]                        |
| A_33_P3417502 | 8,24E-04    | down | -2,4141884 | WNT3A      | Homo sapiens wingless-type MMTV integration site family, member 3A (WNT3A), mRNA [NM_033131]                          |
| A_33_P3321070 | 0,025135316 | down | -1,9900742 | WNT4       | wingless-type MMTV integration site family, member 4 [Source:HGNC Symbol;Acc:HGNC:12783] [ENST00000415567]            |
| A_33_P3384058 | 0,03934742  | up   | 2,2758944  | WNT9A      | Homo sapiens wingless-type MMTV integration site family, member 9A (WNT9A), mRNA [NM_003395]                          |
| A_23_P55064   | 0,002793468 | up   | 1,9664865  | WRAP53     | Homo sapiens WD repeat containing, antisense to TP53 (WRAP53), transcript variant 1, mRNA [NM_018081]                 |
| A_24_P192197  | 0,001866956 | up   | 1,5407037  | WRNIP1     | Homo sapiens Werner helicase interacting protein 1 (WRNIP1), transcript variant 2, mRNA [NM_130395]                   |
| A_23_P4353    | 0,04696486  | up   | 1,8487909  | WSB1       | Homo sapiens WD repeat and SOCS box containing 1 (WSB1), transcript variant 1, mRNA [NM_015626]                       |
| A_23_P81392   | 0,00825232  | up   | 1,6719011  | WWC1       | Homo sapiens WW and C2 domain containing 1 (WWC1), transcript variant 3, mRNA [NM_015238]                             |
| A_23_P71972   | 3,68E-04    | down | -2,2378073 | WWOX       | Homo sapiens WW domain containing oxidoreductase (WWOX), transcript variant 1, mRNA [NM_016373]                       |

|               |             |      |            |            |                                                                                                                                                              |
|---------------|-------------|------|------------|------------|--------------------------------------------------------------------------------------------------------------------------------------------------------------|
| A_23_P142013  | 0,001076677 | down | -1,7188562 | XAB2       | Homo sapiens XPA binding protein 2 (XAB2), mRNA [NM_020196]                                                                                                  |
| A_33_P3352304 | 0,006724028 | up   | 2,8593209  | XAGE-4     | PREDICTED: Homo sapiens XAGE-4 protein (XAGE-4), misc_RNA [XR_430517]                                                                                        |
| A_24_P315014  | 0,034123838 | up   | 2,3662803  | XAGE-4     | PREDICTED: Homo sapiens XAGE-4 protein (XAGE-4), misc_RNA [XR_430517]                                                                                        |
| A_24_P288779  | 0,042096756 | up   | 1,8885725  | XAGE5      | Homo sapiens X antigen family, member 5 (XAGE5), mRNA [NM_130775]                                                                                            |
| A_33_P3270863 | 7,03E-04    | up   | 2,5602431  | XDH        | Homo sapiens xanthine dehydrogenase (XDH), mRNA [NM_000379]                                                                                                  |
| A_33_P3304948 | 0,007767445 | up   | 1,5400206  | XKR7       | Homo sapiens XK, Kell blood group complex subunit-related family, member 7 (XKR7), mRNA [NM_001011718]                                                       |
| A_33_P3225298 | 1,30E-04    | down | -2,3436878 | XKR9       | Homo sapiens XK, Kell blood group complex subunit-related family, member 9 (XKR9), transcript variant 2, mRNA [NM_001287258]                                 |
| A_23_P331253  | 0,001044964 | up   | 1,6269107  | XPNPEP1    | Homo sapiens X-prolyl aminopeptidase (aminopeptidase P) 1, soluble (XPNPEP1), transcript variant 1, mRNA [NM_020383]                                         |
| A_24_P333716  | 4,16E-04    | up   | 1,6834756  | XPO4       | Homo sapiens exportin 4 (XPO4), mRNA [NM_022459]                                                                                                             |
| A_33_P3363515 | 4,29E-04    | down | -1,6408669 | XRCC3      | X-ray repair complementing defective repair in Chinese hamster cells 3 [Source:HGNC Symbol;Acc:HGNC:12830] [ENST00000557439]                                 |
| A_33_P3377549 | 0,004247702 | up   | 1,5251852  | XRCC5      | X-ray repair complementing defective repair in Chinese hamster cells 5 (double-strand-break rejoining) [Source:HGNC Symbol;Acc:HGNC:12833] [ENST00000392133] |
| A_23_P319792  | 0,002936522 | up   | 1,5863557  | XRN1       | Homo sapiens 5'-3' exoribonuclease 1 (XRN1), transcript variant 1, mRNA [NM_019001]                                                                          |
| A_33_P3422701 | 0,003154572 | down | -1,5329261 | YEATS2     | Homo sapiens cDNA FLJ33401 fis, clone BRACE2009886. [AK090720]                                                                                               |
| A_32_P178945  | 0,006584567 | up   | 2,200248   | YOD1       | Homo sapiens YOD1 deubiquitinase (YOD1), transcript variant 1, mRNA [NM_018566]                                                                              |
| A_24_P787947  | 0,04532634  | up   | 1,5965841  | YPEL2      | Homo sapiens yippee-like 2 (Drosophila) (YPEL2), mRNA [NM_001005404]                                                                                         |
| A_23_P15108   | 9,51E-05    | up   | 2,123709   | YPEL3      | Homo sapiens yippee-like 3 (Drosophila) (YPEL3), transcript variant 1, mRNA [NM_031477]                                                                      |
| A_24_P21770   | 2,33E-05    | down | -4,654021  | YPEL4      | Homo sapiens yippee-like 4 (Drosophila) (YPEL4), mRNA [NM_145008]                                                                                            |
| A_33_P3407105 | 5,68E-04    | down | -1,7463429 | YTHDF1     | Homo sapiens YTH N(6)-methyladenosine RNA binding protein 1 (YTHDF1), mRNA [NM_017798]                                                                       |
| A_33_P3283237 | 0,021721639 | down | -1,6232886 | YY2        | Homo sapiens YY2 transcription factor (YY2), mRNA [NM_206923]                                                                                                |
| A_23_P316064  | 0,001397128 | up   | 1,5935904  | ZACN       | Homo sapiens zinc activated ligand-gated ion channel (ZACN), mRNA [NM_180990]                                                                                |
| A_24_P22746   | 0,002058693 | up   | 1,5090033  | ZADH2      | Homo sapiens zinc binding alcohol dehydrogenase domain containing 2 (ZADH2), mRNA [NM_175907]                                                                |
| A_23_P366394  | 0,02046339  | up   | 1,6083752  | ZAK        | Homo sapiens sterile alpha motif and leucine zipper containing kinase AZK (ZAK), transcript variant 1, mRNA [NM_016653]                                      |
| A_23_P82286   | 1,64E-04    | down | -2,5443673 | ZAN        | Homo sapiens zonadhesin (gene/pseudogene) (ZAN), transcript variant 6, mRNA [NM_173059]                                                                      |
| A_33_P3313476 | 6,19E-04    | down | -3,6854281 | ZAR1L      | Homo sapiens zygote arrest 1-like (ZAR1L), mRNA [NM_001136571]                                                                                               |
| A_23_P217507  | 0,031632617 | up   | 1,5407128  | ZBED1      | Homo sapiens zinc finger, BED-type containing 1 (ZBED1), transcript variant 2, mRNA [NM_004729]                                                              |
| A_23_P93032   | 0,04962405  | down | -2,3807964 | ZBED3      | Homo sapiens zinc finger, BED-type containing 3 (ZBED3), mRNA [NM_032367]                                                                                    |
| A_23_P155147  | 2,10E-05    | up   | 2,1566644  | ZBED4      | Homo sapiens zinc finger, BED-type containing 4 (ZBED4), mRNA [NM_014838]                                                                                    |
| A_33_P3357609 | 0,007723198 | up   | 1,6784288  | ZBP1       | Homo sapiens Z-DNA binding protein 1 (ZBP1), transcript variant 4, mRNA [NM_001160419]                                                                       |
| A_23_P40866   | 0,001713608 | up   | 1,8603411  | ZBTB20     | Homo sapiens zinc finger and BTB domain containing 20 (ZBTB20), transcript variant 2, mRNA [NM_015642]                                                       |
| A_21_P0000867 | 0,020338764 | down | -2,1337094 | ZBTB20-AS1 | Homo sapiens ZBTB20 antisense RNA 1 (ZBTB20-AS1), long non-coding RNA [NR_038993]                                                                            |
| A_33_P3295415 | 0,002001245 | down | -1,8396639 | ZBTB3      | Homo sapiens zinc finger and BTB domain containing 3 (ZBTB3), mRNA [NM_024784]                                                                               |
| A_33_P3289167 | 0,018526398 | down | -1,6228967 | ZBTB32     | Homo sapiens zinc finger and BTB domain containing 32 (ZBTB32), mRNA [NM_014383]                                                                             |
| A_23_P131024  | 0,031047247 | up   | 3,0692859  | ZBTB32     | Homo sapiens zinc finger and BTB domain containing 32 (ZBTB32), mRNA [NM_014383]                                                                             |
| A_24_P314351  | 4,96E-05    | up   | 1,7976699  | ZBTB33     | Homo sapiens zinc finger and BTB domain containing 33 (ZBTB33), transcript variant 2, mRNA [NM_006777]                                                       |
| A_32_P194779  | 4,52E-04    | up   | 1,9964631  | ZBTB34     | Homo sapiens zinc finger and BTB domain containing 34 (ZBTB34), mRNA [NM_001099270]                                                                          |
| A_23_P100654  | 1,67E-04    | up   | 1,7856913  | ZBTB4      | Homo sapiens zinc finger and BTB domain containing 4 (ZBTB4), transcript variant 1, mRNA [NM_020899]                                                         |
| A_33_P3349414 | 0,001235643 | up   | 1,7212595  | ZBTB43     | Homo sapiens zinc finger and BTB domain containing 43 (ZBTB43), transcript variant 1, mRNA [NM_014007]                                                       |
| A_24_P592012  | 0,016507382 | up   | 1,8579785  | ZBTB46     | Homo sapiens zinc finger and BTB domain containing 46 (ZBTB46), mRNA [NM_025224]                                                                             |
| A_33_P3266674 | 0,027253147 | up   | 1,5977225  | ZBTB46     | Homo sapiens zinc finger and BTB domain containing 46 (ZBTB46), mRNA [NM_025224]                                                                             |
| A_33_P3217307 | 0,047928065 | down | -1,6813438 | ZBTB8OS    | Homo sapiens archease-like protein isoform ABAC (ARCH) mRNA, complete cds; alternatively spliced. [AY158005]                                                 |
| A_24_P397903  | 0,005106407 | down | -2,2855434 | ZC2HC1A    | Homo sapiens zinc finger, C2HC-type containing 1A (ZC2HC1A), mRNA [NM_016010]                                                                                |
| A_33_P3307820 | 0,001592618 | down | -3,079182  | ZC2HC1B    | Homo sapiens zinc finger, C2HC-type containing 1B (ZC2HC1B), mRNA [NM_001013623]                                                                             |
| A_32_P130265  | 0,002936289 | up   | 1,5164685  | ZC3H11A    | Homo sapiens zinc finger CCCH-type containing 11A (ZC3H11A), mRNA [NM_014827]                                                                                |
| A_23_P58967   | 0,001101257 | up   | 1,5498068  | ZC3H11A    | Homo sapiens zinc finger CCCH-type containing 11A (ZC3H11A), mRNA [NM_014827]                                                                                |
| A_33_P3214720 | 0,025693426 | up   | 1,5713482  | ZC3H12A    | Homo sapiens zinc finger CCCH-type containing 12A (ZC3H12A), mRNA [NM_025079]                                                                                |
| A_33_P3419399 | 1,17E-04    | down | -2,4607363 | ZC3H12D    | Homo sapiens zinc finger CCCH-type containing 12D (ZC3H12D), mRNA [NM_207360]                                                                                |
| A_24_P241330  | 6,58E-04    | up   | 1,5652162  | ZC3H14     | Homo sapiens zinc finger CCCH-type containing 14 (ZC3H14), transcript variant 1, mRNA [NM_024824]                                                            |
| A_24_P220618  | 0,00206191  | up   | 1,522662   | ZC3H4      | Homo sapiens zinc finger CCCH-type containing 4 (ZC3H4), mRNA [NM_015168]                                                                                    |
| A_23_P218807  | 0,022151593 | up   | 1,959699   | ZC3H7B     | Homo sapiens zinc finger CCCH-type containing 7B (ZC3H7B), mRNA [NM_017590]                                                                                  |
| A_23_P31532   | 4,96E-05    | down | -3,0038102 | ZC3HAV1L   | Homo sapiens zinc finger CCCH-type, antiviral 1-like (ZC3HAV1L), mRNA [NM_080660]                                                                            |
| A_33_P3214432 | 0,009547078 | down | -1,5655495 | ZC3HAV1L   | Homo sapiens zinc finger CCCH-type, antiviral 1-like (ZC3HAV1L), mRNA [NM_080660]                                                                            |
| A_23_P34433   | 0,006382509 | up   | 1,7350188  | ZCCHC11    | Homo sapiens zinc finger, CCHC domain containing 11 (ZCCHC11), transcript variant 1, mRNA [NM_001009881]                                                     |
| A_32_P134290  | 8,95E-05    | up   | 1,9441653  | ZCCHC2     | Homo sapiens zinc finger, CCHC domain containing 2 (ZCCHC2), transcript variant 1, mRNA [NM_017742]                                                          |
| A_33_P3210228 | 2,33E-04    | up   | 3,362748   | ZCCHC6     | Homo sapiens zinc finger, CCHC domain containing 6 [Source:HGNC Symbol;Acc:HGNC:25817] [ENST00000375947]                                                     |
| A_21_P0013817 | 0,002456426 | down | -1,7210193 | ZCRB1      | Homo sapiens zinc finger CCHC-type and RNA binding motif 1 (ZCRB1), mRNA [NM_033114]                                                                         |
| A_33_P3404531 | 0,014665444 | down | -1,7070621 | ZCWPW1     | Homo sapiens zinc finger, CW type with PWPP domain 1 (ZCWPW1), transcript variant 2, mRNA [NM_001258008]                                                     |
| A_21_P0012878 | 0,018345289 | up   | 2,0727983  | ZDHHHC11   | Homo sapiens zinc finger, DHHC-type containing 11 (ZDHHHC11), mRNA [NM_024786]                                                                               |
| A_23_P319633  | 0,004432304 | up   | 1,5475016  | ZDHHHC15   | Homo sapiens zinc finger, DHHC-type containing 15 (ZDHHHC15), transcript variant 1, mRNA [NM_144969]                                                         |
| A_23_P314789  | 5,16E-04    | down | -3,3098562 | ZDHHHC19   | Homo sapiens zinc finger, DHHC-type containing 19 (ZDHHHC19), mRNA [NM_001039617]                                                                            |
| A_23_P355447  | 0,012964112 | up   | 1,6627517  | ZDHHHC22   | Homo sapiens zinc finger, DHHC-type containing 22 (ZDHHHC22), mRNA [NM_174976]                                                                               |
| A_23_P161183  | 5,27E-04    | up   | 1,8322465  | ZDHHHC6    | Homo sapiens zinc finger, DHHC-type containing 6 (ZDHHHC6), transcript variant 1, mRNA [NM_022494]                                                           |



|               |                  |                    |                                                                                                         |
|---------------|------------------|--------------------|---------------------------------------------------------------------------------------------------------|
| A_23_P148057  | 7,73E-04 up      | 1,6142142 ZDHHC9   | Homo sapiens zinc finger, DHHC-type containing 9 (ZDHHC9), transcript variant 1, mRNA [NM_016032]       |
| A_33_P3301782 | 0,002815629 up   | 1,956444 ZEB1-AS1  | Homo sapiens ZEB1 antisense RNA 1 (ZEB1-AS1), long non-coding RNA [NR_024284]                           |
| A_23_P1170    | 0,013115049 down | -1,8267266 ZFAND4  | Homo sapiens zinc finger, AN1-type domain 4 (ZFAND4), transcript variant 1, mRNA [NM_174890]            |
| A_33_P3301316 | 0,017113252 down | -1,7618134 ZFAND4  | Homo sapiens zinc finger, AN1-type domain 4 (ZFAND4), transcript variant 3, mRNA [NM_001282905]         |
| A_23_P150950  | 2,95E-04 up      | 1,8891126 ZFC3H1   | Homo sapiens zinc finger, C3H1-type containing (ZFC3H1), mRNA [NM_144982]                               |
| A_23_P3856    | 0,005283977 up   | 1,6469296 ZFP1     | Homo sapiens ZFP1 zinc finger protein (ZFP1), mRNA [NM_153688]                                          |
| A_24_P151106  | 0,040223103 up   | 2,0224743 ZFP28    | Homo sapiens ZFP28 zinc finger protein (ZFP28), mRNA [NM_020828]                                        |
| A_23_P39237   | 0,012622566 up   | 2,032421 ZFP36     | Homo sapiens ZFP36 ring finger protein (ZFP36), mRNA [NM_003407]                                        |
| A_23_P101960  | 1,32E-04 up      | 2,2432005 ZFP36L2  | Homo sapiens ZFP36 ring finger protein-like 2 (ZFP36L2), mRNA [NM_006887]                               |
| A_23_P203344  | 0,004655898 up   | 1,5532017 ZFP91    | Homo sapiens ZFP91 zinc finger protein (ZFP91), transcript variant 1, mRNA [NM_053023]                  |
| A_33_P3329664 | 1,17E-05 down    | -5,4850106 ZFP92   | Homo sapiens ZFP92 zinc finger protein (ZFP92), mRNA [NM_001136273]                                     |
| A_24_P32118   | 0,001080765 up   | 1,6431007 ZFYVE26  | Homo sapiens zinc finger, FYVE domain containing 26 (ZFYVE26), mRNA [NM_015346]                         |
| A_33_P3278560 | 3,11E-04 down    | -1,6644646 ZIK1    | Homo sapiens zinc finger protein interacting with K protein 1 (ZIK1), mRNA [NM_001010879]               |
| A_23_P78479   | 0,00115439 down  | -2,7361388 ZIM2    | Homo sapiens zinc finger, imprinted 2 (ZIM2), transcript variant 1, mRNA [NM_015363]                    |
| A_23_P259663  | 0,047861103 up   | 1,5446947 ZKSCAN5  | Homo sapiens zinc finger with KRAB and SCAN domains 5 (ZKSCAN5), transcript variant 1, mRNA [NM_014569] |
| A_23_P125748  | 0,002345292 down | -2,362673 ZMAT1    | Homo sapiens zinc finger, matrin-type 1 (ZMAT1), transcript variant 2, mRNA [NM_001282400]              |
| A_33_P3216133 | 0,029354028 down | -3,2312822 ZMAT4   | Homo sapiens zinc finger, matrin-type 4 (ZMAT4), transcript variant 1, mRNA [NM_024645]                 |
| A_23_P138435  | 0,031255275 up   | 1,6037539 ZMIZ1    | Homo sapiens zinc finger, MIZ-type containing 1 (ZMIZ1), mRNA [NM_020338]                               |
| A_24_P29686   | 7,50E-04 up      | 1,8061341 ZMIZ2    | Homo sapiens zinc finger, MIZ-type containing 2 (ZMIZ2), transcript variant 1, mRNA [NM_031449]         |
| A_23_P161091  | 0,006157749 up   | 1,692592 ZMYM1     | Homo sapiens zinc finger, MYM-type 1 (ZMYM1), transcript variant 5, mRNA [NM_024772]                    |
| A_23_P99405   | 6,66E-05 up      | 2,0128722 ZMYM2    | Homo sapiens zinc finger, MYM-type 2 (ZMYM2), transcript variant 1, mRNA [NM_003453]                    |
| A_24_P237757  | 3,18E-04 up      | 1,902595 ZMYM2     | zinc finger, MYM-type 2 [Source:HGNC Symbol;Acc:HGNC:12989] [ENST00000382881]                           |
| A_24_P25326   | 0,00150186 up    | 1,6642265 ZMYM6    | Homo sapiens zinc finger, MYM-type 6 (ZMYM6), mRNA [NM_007167]                                          |
| A_23_P75083   | 5,56E-04 down    | -1,8222739 ZMYND11 | Homo sapiens zinc finger, MYND-type containing 11 (ZMYND11), transcript variant 2, mRNA [NM_212479]     |
| A_23_P369666  | 1,19E-04 up      | 2,2849078 ZMYND8   | zinc finger, MYND-type containing 8 [Source:HGNC Symbol;Acc:HGNC:9397] [ENST00000468376]                |
| A_23_P45087   | 0,03183994 up    | 1,5495541 ZNF107   | Homo sapiens zinc finger protein 107 (ZNF107), transcript variant 1, mRNA [NM_016220]                   |
| A_23_P101811  | 0,001648302 up   | 1,5837448 ZNF14    | Homo sapiens zinc finger protein 14 (ZNF14), mRNA [NM_021030]                                           |
| A_24_P241792  | 0,009821941 up   | 1,5391015 ZNF160   | Homo sapiens zinc finger protein 160 (ZNF160), transcript variant 2, mRNA [NM_198893]                   |
| A_33_P3421363 | 0,00155421 down  | -1,5181446 ZNF169  | Homo sapiens zinc finger protein 169 (ZNF169), transcript variant 2, mRNA [NM_194320]                   |
| A_23_P156620  | 0,002759121 up   | 1,554876 ZNF184    | Homo sapiens zinc finger protein 184 (ZNF184), mRNA [NM_007149]                                         |
| A_23_P415558  | 0,008701056 up   | 1,6448098 ZNF212   | Homo sapiens zinc finger protein 212 (ZNF212), mRNA [NM_012256]                                         |
| A_23_P210608  | 9,27E-04 up      | 1,6610337 ZNF217   | Homo sapiens zinc finger protein 217 (ZNF217), mRNA [NM_006526]                                         |
| A_24_P113287  | 0,007657573 up   | 1,6220276 ZNF229   | Homo sapiens zinc finger protein 229 (ZNF229), transcript variant 1, mRNA [NM_014518]                   |
| A_23_P153286  | 0,008246581 up   | 1,595224 ZNF234    | Homo sapiens zinc finger protein 234 (ZNF234), transcript variant 1, mRNA [NM_006630]                   |
| A_33_P3360912 | 8,01E-04 down    | -2,222186 ZNF236   | zinc finger protein 236 [Source:HGNC Symbol;Acc:HGNC:13028] [ENST00000543926]                           |
| A_23_P35343   | 0,040166385 up   | 1,5952938 ZNF248   | Homo sapiens zinc finger protein 248 (ZNF248), transcript variant 1, mRNA [NM_021045]                   |
| A_24_P49517   | 0,005189719 up   | 1,6091839 ZNF251   | Homo sapiens zinc finger protein 251 (ZNF251), mRNA [NM_138367]                                         |
| A_33_P3412349 | 0,008703049 down | -1,990491 ZNF268   | Homo sapiens zinc finger protein 268 (ZNF268), transcript variant 3, mRNA [NM_152943]                   |
| A_33_P3340682 | 0,010270871 up   | 1,5638185 ZNF276   | Homo sapiens zinc finger protein 276 (ZNF276), transcript variant a, mRNA [NM_001113525]                |
| A_24_P282043  | 0,005437287 up   | 2,49193 ZNF28      | Homo sapiens zinc finger protein 28 (ZNF28), transcript variant 1, mRNA [NM_006969]                     |
| A_23_P154972  | 0,013814126 down | -2,225794 ZNF280A  | Homo sapiens zinc finger protein 280A (ZNF280A), mRNA [NM_080740]                                       |
| A_23_P311087  | 0,0020305 up     | 1,7534053 ZNF281   | Homo sapiens zinc finger protein 281 (ZNF281), transcript variant 1, mRNA [NM_012482]                   |
| A_23_P311358  | 0,01359433 up    | 1,5087961 ZNF282   | zinc finger protein 282 [Source:HGNC Symbol;Acc:HGNC:13076] [ENST00000610704]                           |
| A_33_P3221432 | 0,004107908 up   | 1,9055258 ZNF284   | Homo sapiens zinc finger protein 284 (ZNF284), mRNA [NM_001037813]                                      |
| A_32_P129968  | 3,43E-04 up      | 2,0094275 ZNF284   | zinc finger protein 284 [Source:HGNC Symbol;Acc:HGNC:13078] [ENST00000421176]                           |
| A_33_P3237517 | 0,007953232 up   | 1,7553753 ZNF292   | zinc finger protein 292 [Source:HGNC Symbol;Acc:HGNC:18410] [ENST00000369578]                           |
| A_23_P208288  | 0,001252858 up   | 1,5484003 ZNF304   | Homo sapiens zinc finger protein 304 (ZNF304), transcript variant 2, mRNA [NM_020657]                   |
| A_33_P3343442 | 9,23E-04 down    | -1,8831791 ZNF316  | Homo sapiens zinc finger protein 316 (ZNF316), mRNA [NM_001278559]                                      |
| A_33_P3353185 | 0,015497495 up   | 1,6351055 ZNF316   | Homo sapiens zinc finger protein 316 (ZNF316), mRNA [NM_001278559]                                      |
| A_33_P3292060 | 0,010719216 up   | 1,879416 ZNF331    | Homo sapiens zinc finger protein 331 (ZNF331), transcript variant 1, mRNA [NM_018555]                   |
| A_33_P3379512 | 3,14E-05 down    | -2,2249603 ZNF333  | Homo sapiens zinc finger protein 333 (ZNF333), transcript variant 2, mRNA [NM_001300912]                |
| A_33_P3333805 | 0,003363235 up   | 1,8525565 ZNF337   | Homo sapiens zinc finger protein 337 (ZNF337), transcript variant 1, mRNA [NM_001290261]                |
| A_24_P318939  | 0,010021959 up   | 1,7125903 ZNF337   | Homo sapiens zinc finger protein 337 (ZNF337), transcript variant 2, mRNA [NM_015655]                   |
| A_21_P0010866 | 0,028965062 up   | 1,5151695 ZNF37A   | zinc finger protein 37A [Source:HGNC Symbol;Acc:HGNC:13102] [ENST00000361085]                           |
| A_33_P3331031 | 0,014681691 down | -1,9134878 ZNF385C | zinc finger protein 385C [Source:HGNC Symbol;Acc:HGNC:33722] [ENST00000453355]                          |
| A_21_P0011589 | 0,002191905 down | -2,5513875 ZNF385C | Homo sapiens zinc finger protein 385C (ZNF385C), mRNA [NM_001242704]                                    |
| A_21_P0011588 | 0,019014973 up   | 2,1412284 ZNF385C  | Homo sapiens zinc finger protein 385C (ZNF385C), mRNA [NM_001242704]                                    |
| A_21_P0013971 | 0,037075818 down | -1,8197136 ZNF385D | zinc finger protein 385D [Source:HGNC Symbol;Acc:HGNC:26191] [ENST00000497570]                          |
| A_24_P393565  | 9,62E-06 down    | -2,911078 ZNF396   | zinc finger protein 396 [Source:HGNC Symbol;Acc:HGNC:18824] [ENST00000589332]                           |
| A_32_P151875  | 0,012517402 up   | 1,5198244 ZNF398   | Homo sapiens zinc finger protein 398 (ZNF398), transcript variant 2, mRNA [NM_020781]                   |
| A_21_P0009769 | 7,61E-04 down    | -2,394029 ZNF404   | zinc finger protein 404 [Source:HGNC Symbol;Acc:HGNC:19417] [ENST00000588094]                           |

|               |                  |                      |                                                                                                      |
|---------------|------------------|----------------------|------------------------------------------------------------------------------------------------------|
| A_33_P3340385 | 0,006008596 up   | 1,5007534 ZNF43      | Homo sapiens zinc finger protein 43 (ZNF43), transcript variant 1, mRNA [NM_001256648]               |
| A_23_P56298   | 0,001550232 up   | 1,6654925 ZNF430     | Homo sapiens zinc finger protein 430 (ZNF430), transcript variant 1, mRNA [NM_025189]                |
| A_33_P3327842 | 0,012248652 down | -1,7173463 ZNF436    | Homo sapiens zinc finger protein 436 (ZNF436), transcript variant 1, mRNA [NM_001077195]             |
| A_21_P0006983 | 0,004283102 up   | 1,6180395 ZNF438     | zinc finger protein 438 [Source:HGNC Symbol;Acc:HGNC:21029] [ENST00000609683]                        |
| A_33_P3278774 | 0,031069675 up   | 1,5957682 ZNF44      | zinc finger protein 44 [Source:HGNC Symbol;Acc:HGNC:13110] [ENST00000483826]                         |
| A_23_P316582  | 0,003018955 up   | 2,192878 ZNF441      | Homo sapiens zinc finger protein 441 (ZNF441), mRNA [NM_152355]                                      |
| A_24_P218074  | 8,19E-06 down    | -3,6372604 ZNF467    | Homo sapiens zinc finger protein 467 (ZNF467), mRNA [NM_207336]                                      |
| A_24_P16249   | 0,02886016 down  | -1,9525875 ZNF479    | Homo sapiens zinc finger protein 479 (ZNF479), mRNA [NM_033273]                                      |
| A_23_P319050  | 0,010992566 up   | 1,8985858 ZNF493     | Homo sapiens zinc finger protein 493 (ZNF493), transcript variant 2, mRNA [NM_145326]                |
| A_24_P376787  | 0,039462384 down | -1,5595059 ZNF496    | Homo sapiens zinc finger protein 496 (ZNF496), mRNA [NM_032752]                                      |
| A_33_P3239143 | 9,78E-05 down    | -3,0111766 ZNF497    | Homo sapiens zinc finger protein 497 (ZNF497), transcript variant 1, mRNA [NM_198458]                |
| A_33_P3262495 | 0,003131289 up   | 1,5575842 ZNF503     | Homo sapiens zinc finger protein 503 (ZNF503), transcript variant 1, mRNA [NM_032772]                |
| A_23_P391164  | 0,020304194 up   | 1,5296849 ZNF512     | Homo sapiens zinc finger protein 512 (ZNF512), transcript variant 1, mRNA [NM_032434]                |
| A_24_P88775   | 0,002578368 up   | 1,7500819 ZNF514     | Homo sapiens zinc finger protein 514 (ZNF514), mRNA [NM_032788]                                      |
| A_21_P0014669 | 0,036021646 up   | 1,7896283 ZNF518A    | zinc finger protein 518A [Source:HGNC Symbol;Acc:HGNC:29009] [ENST00000563195]                       |
| A_21_P0010834 | 0,005084815 down | -1,5858958 ZNF532    | Homo sapiens zinc finger protein 532 (ZNF532), mRNA [NM_018181]                                      |
| A_23_P399146  | 0,007310599 up   | 1,5409237 ZNF549     | Homo sapiens zinc finger protein 549 (ZNF549), transcript variant 2, mRNA [NM_153263]                |
| A_24_P68019   | 0,001318917 up   | 1,8666247 ZNF551     | Homo sapiens zinc finger protein 551 (ZNF551), transcript variant 1, mRNA [NM_138347]                |
| A_23_P39454   | 0,033834122 up   | 2,079873 ZNF556      | Homo sapiens zinc finger protein 556 (ZNF556), transcript variant 1, mRNA [NM_024967]                |
| A_24_P284584  | 0,024975754 up   | 1,6601096 ZNF559     | Homo sapiens zinc finger protein 559 (ZNF559), transcript variant 2, mRNA [NM_032497]                |
| A_23_P306956  | 0,04125525 down  | -1,6411555 ZNF566    | Homo sapiens zinc finger protein 566 (ZNF566), transcript variant 3, mRNA [NM_032838]                |
| A_33_P3345126 | 0,004057325 down | -1,9128958 ZNF568    | Homo sapiens zinc finger protein 568 (ZNF568), transcript variant 1, mRNA [NM_198539]                |
| A_23_P339079  | 0,001056467 up   | 1,5447397 ZNF573     | Homo sapiens zinc finger protein 573 (ZNF573), transcript variant 1, mRNA [NM_152360]                |
| A_33_P3248035 | 0,04345271 up    | 1,6893604 ZNF577     | zinc finger protein 577 [Source:HGNC Symbol;Acc:HGNC:28673] [ENST00000588129]                        |
| A_33_P3345132 | 0,007508155 up   | 2,1124203 ZNF578     | Homo sapiens zinc finger protein 578 (ZNF578), mRNA [NM_001099694]                                   |
| A_23_P101281  | 0,002846152 up   | 1,9390533 ZNF587     | Homo sapiens zinc finger protein 587 (ZNF587), transcript variant 1, mRNA [NM_032828]                |
| A_21_P0000157 | 0,013018698 up   | 1,5504974 ZNF587B    | Homo sapiens zinc finger protein 587B (ZNF587B), mRNA [NM_001204818]                                 |
| A_33_P3396120 | 0,005869282 down | -1,6969029 ZNF594    | Homo sapiens zinc finger protein 594 (ZNF594), mRNA [NM_032530]                                      |
| A_32_P187663  | 0,009927182 down | -1,6942936 ZNF596    | Homo sapiens zinc finger protein 596 (ZNF596), transcript variant 1, mRNA [NM_001042416]             |
| A_24_P378402  | 0,00285356 down  | -1,9799507 ZNF597    | Homo sapiens zinc finger protein 597 (ZNF597), mRNA [NM_152457]                                      |
| A_21_P0014663 | 0,008045577 down | -1,6548572 ZNF605    | Homo sapiens zinc finger protein 605 (ZNF605), transcript variant 1, mRNA [NM_183238]                |
| A_23_P355993  | 2,42E-05 down    | -1,936438 ZNF614     | Homo sapiens zinc finger protein 614 (ZNF614), mRNA [NM_025040]                                      |
| A_33_P3245784 | 0,039974395 down | -1,5100654 ZNF620    | Homo sapiens zinc finger protein 620 (ZNF620), transcript variant 1, mRNA [NM_175888]                |
| A_33_P3209030 | 0,0172236 up     | 1,5053298 ZNF623     | Homo sapiens zinc finger protein 623 (ZNF623), transcript variant 2, mRNA [NM_001082480]             |
| A_24_P419177  | 0,00198491 down  | -1,6727167 ZNF638    | Homo sapiens zinc finger protein 638 (ZNF638), transcript variant 1, mRNA [NM_014497]                |
| A_33_P3239790 | 0,02109691 down  | -1,6541026 ZNF646    | Homo sapiens zinc finger protein 646 (ZNF646), mRNA [NM_014699]                                      |
| A_21_P0014372 | 0,024754934 down | -1,956557 ZNF649-AS1 | Homo sapiens ZNF649 antisense RNA 1 (ZNF649-AS1), long non-coding RNA [NR_110733]                    |
| A_32_P79591   | 0,011475936 down | -2,3474417 ZNF665    | Homo sapiens zinc finger protein 665 (ZNF665), mRNA [NM_024733]                                      |
| A_23_P101623  | 0,006858968 up   | 1,6665347 ZNF667     | Homo sapiens zinc finger protein 667 (ZNF667), transcript variant 1, mRNA [NM_022103]                |
| A_23_P86386   | 0,005405157 up   | 1,7329061 ZNF669     | Homo sapiens zinc finger protein 669 (ZNF669), transcript variant 1, mRNA [NM_024804]                |
| A_23_P74981   | 0,001611604 down | -1,7609196 ZNF670    | Homo sapiens zinc finger protein 670 (ZNF670), transcript variant 1, mRNA [NM_033213]                |
| A_24_P256654  | 0,003882135 up   | 1,8364304 ZNF674-AS1 | Homo sapiens ZNF674 antisense RNA 1 (head to head) (ZNF674-AS1), long non-coding RNA [NR_015378]     |
| A_33_P3231700 | 0,011005186 up   | 1,9938086 ZNF677     | Homo sapiens mRNA; cDNA DKFZp686M13108 (from clone DKFZp686M13108). [BX648243]                       |
| A_24_P944588  | 0,006556612 up   | 1,5473949 ZNF682     | Homo sapiens zinc finger protein 682 (ZNF682), transcript variant 1, mRNA [NM_033196]                |
| A_33_P3208970 | 0,041954774 down | -1,8834369 ZNF683    | Homo sapiens zinc finger protein 683 (ZNF683), transcript variant 1, mRNA [NM_001114759]             |
| A_23_P35316   | 0,007658263 down | -1,819974 ZNF695     | Homo sapiens zinc finger protein 695 (ZNF695), transcript variant 1, mRNA [NM_020394]                |
| A_23_P130444  | 0,009580362 up   | 1,5431291 ZNF701     | Homo sapiens zinc finger protein 701 (ZNF701), transcript variant 2, mRNA [NM_018260]                |
| A_33_P3316169 | 0,035464313 up   | 1,7066997 ZNF705E    | Homo sapiens zinc finger protein 705E (ZNF705E), mRNA [NM_001278713]                                 |
| A_33_P3275174 | 0,022207825 down | -1,8868585 ZNF705G   | Homo sapiens zinc finger protein 705G (ZNF705G), mRNA [NM_001164457]                                 |
| A_23_P345674  | 0,003397771 up   | 1,6243421 ZNF71      | Homo sapiens zinc finger protein 71 (ZNF71), mRNA [NM_021216]                                        |
| A_33_P3408117 | 0,007869578 down | -2,3195586 ZNF717    | Homo sapiens zinc finger protein 717 (ZNF717), transcript variant 1, mRNA [NM_001128223]             |
| A_21_P0011427 | 0,004032261 up   | 1,8847568 ZNF720     | PREDICTED: Homo sapiens zinc finger protein 720 (ZNF720), transcript variant X1, mRNA [XM_005255122] |
| A_21_P0011683 | 0,025183277 up   | 2,3293517 ZNF729     | Homo sapiens zinc finger protein 729 (ZNF729), mRNA [NM_001242680]                                   |
| A_33_P3388067 | 0,048150588 down | -1,7784135 ZNF735    | Homo sapiens zinc finger protein 735 (ZNF735), mRNA [NM_001159524]                                   |
| A_23_P28042   | 0,036272682 down | -1,7023242 ZNF737    | Homo sapiens zinc finger protein 737 (ZNF737), mRNA [NM_001159293]                                   |
| A_19_P0081828 | 0,006277138 up   | 2,215944 ZNF737      | Homo sapiens zinc finger protein 737 (ZNF737), mRNA [NM_001159293]                                   |
| A_24_P206344  | 1,16E-04 down    | -1,7848634 ZNF746    | Homo sapiens zinc finger protein 746 (ZNF746), transcript variant 2, mRNA [NM_152557]                |
| A_24_P941487  | 0,004028323 up   | 1,5936552 ZNF761     | Homo sapiens zinc finger protein 761 (ZNF761), transcript variant 1, mRNA [NM_001008401]             |
| A_33_P3289422 | 5,38E-04 up      | 1,7090048 ZNF765     | Homo sapiens zinc finger protein 765 (ZNF765), mRNA [NM_001040185]                                   |
| A_33_P3267081 | 0,010437447 down | -1,6109357 ZNF771    | Homo sapiens zinc finger protein 771 (ZNF771), transcript variant 1, mRNA [NM_016643]                |
| A_23_P170581  | 0,008682855 up   | 1,5195721 ZNF778     | zinc finger protein 778 [Source:HGNC Symbol;Acc:HGNC:26479] [ENST00000620195]                        |

|                |                  |                          |                                                                                                                    |
|----------------|------------------|--------------------------|--------------------------------------------------------------------------------------------------------------------|
| A_23_P365418   | 0,002797879 up   | 1,760648 ZNF783          | Homo sapiens zinc finger family member 783 (ZNF783), mRNA [NM_001195220]                                           |
| A_23_P157022   | 1,22E-04 up      | 2,0179043 ZNF786         | Homo sapiens zinc finger protein 786 (ZNF786), mRNA [NM_152411]                                                    |
| A_33_P3261927  | 0,017966352 up   | 1,6794516 ZNF789         | Homo sapiens zinc finger protein 789 (ZNF789), transcript variant 1, mRNA [NM_213603]                              |
| A_33_P3311770  | 0,003019964 up   | 1,94538 ZNF789           | Homo sapiens zinc finger protein 789 (ZNF789), transcript variant 1, mRNA [NM_213603]                              |
| A_21_P0000184  | 0,037386067 down | -1,6586441 ZNF790        | Homo sapiens zinc finger protein 790 (ZNF790), transcript variant 4, mRNA [NM_001242802]                           |
| A_23_P50418    | 5,99E-04 up      | 1,6197184 ZNF791         | Homo sapiens zinc finger protein 791 (ZNF791), mRNA [NM_153358]                                                    |
| A_33_P3399864  | 0,011074869 down | -2,3927116 ZNF792        | Homo sapiens zinc finger protein 792 (ZNF792), mRNA [NM_175872]                                                    |
| A_23_P256526   | 0,024133723 down | -2,051116 ZNF80          | Homo sapiens zinc finger protein 80 (ZNF80), mRNA [NM_007136]                                                      |
| A_19_P00812349 | 0,004448604 up   | 1,6791031 ZNF805         | Homo sapiens zinc finger protein 805 (ZNF805), transcript variant 1, mRNA [NM_001023563]                           |
| A_19_P00315963 | 0,007330078 up   | 1,7074558 ZNF805         | Homo sapiens zinc finger protein 805 (ZNF805), transcript variant 1, mRNA [NM_001023563]                           |
| A_21_P0011739  | 5,39E-05 down    | -1,7915095 ZNF807        | zinc finger protein 807 [Source:HGNC Symbol;Acc:HGNC:33229] [ENST00000328088]                                      |
| A_33_P3210860  | 0,013527683 down | -2,073493 ZNF808         | Homo sapiens zinc finger protein 808 (ZNF808), mRNA [NM_001039886]                                                 |
| A_33_P3273298  | 0,001567165 down | -1,5696726 ZNF813        | Homo sapiens zinc finger protein 813 (ZNF813), mRNA [NM_001004301]                                                 |
| A_33_P3247848  | 0,001648722 up   | 1,6462917 ZNF814         | Homo sapiens zinc finger protein 814 (ZNF814), mRNA [NM_001144989]                                                 |
| A_33_P3220113  | 1,48E-04 up      | 2,0116518 ZNF816-ZNF321P | Homo sapiens ZNF816-ZNF321P readthrough (ZNF816-ZNF321P), mRNA [NM_001202473]                                      |
| A_23_P105276   | 0,003575847 up   | 1,5394777 ZNF84          | Homo sapiens zinc finger protein 84 (ZNF84), transcript variant 1, mRNA [NM_003428]                                |
| A_24_P161144   | 1,15E-04 down    | -2,337286 ZNF843         | Homo sapiens zinc finger protein 843 (ZNF843), mRNA [NM_001136509]                                                 |
| A_21_P0012116  | 0,004108244 down | -1,6700088 ZNF850        | Homo sapiens zinc finger protein 850 (ZNF850), transcript variant 1, mRNA [NM_001193552]                           |
| A_24_P333421   | 0,002214947 up   | 1,6563462 ZNF862         | Homo sapiens zinc finger protein 862 (ZNF862), mRNA [NM_001099220]                                                 |
| A_24_P323967   | 0,006877268 down | -1,8901371 ZNF880        | Homo sapiens zinc finger protein 880 (ZNF880), mRNA [NM_001145434]                                                 |
| A_21_P0011108  | 0,012927027 down | -2,0651278 ZNF891        | Homo sapiens zinc finger protein 891 (ZNF891), mRNA [NM_001277291]                                                 |
| A_19_P00801042 | 2,23E-04 down    | -2,4501977 ZNF90         | zinc finger protein 90 [Source:HGNC Symbol;Acc:HGNC:13165] [ENST00000469078]                                       |
| A_24_P358619   | 0,016196823 down | -1,5503647 ZNF99         | Homo sapiens zinc finger protein 99 (ZNF99), mRNA [NM_001080409]                                                   |
| A_33_P3243248  | 0,005519266 down | -3,1779187 ZNFX1         | zinc finger, NFX1-type containing 1 [Source:HGNC Symbol;Acc:HGNC:29271] [ENST00000469991]                          |
| A_33_P3304516  | 0,017013807 up   | 1,5092747 ZNFX1          | Homo sapiens zinc finger, NFX1-type containing 1 (ZNFX1), mRNA [NM_021035]                                         |
| A_33_P3343976  | 0,006749864 down | -1,952113 ZNRD1-AS1      | Homo sapiens ZNRD1 antisense RNA 1 (ZNRD1-AS1), long non-coding RNA [NR_026751]                                    |
| A_21_P0000536  | 0,007522089 down | -1,7395022 ZNRF2         | Homo sapiens zinc and ring finger 2, E3 ubiquitin protein ligase (ZNRF2), mRNA [NM_147128]                         |
| A_23_P427502   | 0,008958895 up   | 1,561115 ZNRF3           | Homo sapiens zinc and ring finger 3 (ZNRF3), transcript variant 1, mRNA [NM_001206998]                             |
| A_23_P1912     | 0,027355542 up   | 1,8704859 ZP1            | Homo sapiens zona pellucida glycoprotein 1 (sperm receptor) (ZP1), mRNA [NM_207341]                                |
| A_33_P3398096  | 0,034812048 down | -1,7620234 ZPLD1         | Homo sapiens zona pellucida-like domain containing 1 (ZPLD1), mRNA [NM_175056]                                     |
| A_33_P3261565  | 0,00196021 up    | 1,7436241 ZRANB1         | Homo sapiens zinc finger, RAN-binding domain containing 1 (ZRANB1), mRNA [NM_017580]                               |
| A_23_P322395   | 0,003192166 down | -3,8170924 ZSCAN1        | Homo sapiens zinc finger and SCAN domain containing 1 (ZSCAN1), mRNA [NM_182572]                                   |
| A_21_P0000526  | 6,58E-04 down    | -2,253439 ZSCAN18        | Homo sapiens zinc finger and SCAN domain containing 18 (ZSCAN18), transcript variant 5, non-coding RNA [NR_027135] |
| A_23_P23102    | 0,023017745 up   | 1,5080118 ZSCAN20        | Homo sapiens zinc finger and SCAN domain containing 20 (ZSCAN20), mRNA [NM_145238]                                 |
| A_32_P196115   | 0,029359324 up   | 1,5416459 ZSCAN25        | Homo sapiens zinc finger and SCAN domain containing 25 (ZSCAN25), mRNA [NM_145115]                                 |
| A_33_P3302741  | 0,002714026 down | -1,7438822 ZSCAN30       | zinc finger and SCAN domain containing 30 [Source:HGNC Symbol;Acc:HGNC:33517] [ENST00000589178]                    |
| A_23_P383118   | 0,007561164 down | -1,8940718 ZSWIM5        | Homo sapiens zinc finger, SWIM-type containing 5 (ZSWIM5), mRNA [NM_020883]                                        |
| A_19_P00322299 | 0,039448485 down | -1,5543164 ZSWIM6        | Homo sapiens zinc finger, SWIM-type containing 6 (ZSWIM6), mRNA [NM_020928]                                        |
| A_21_P0000778  | 0,01967905 up    | 1,668465 ZSWIM8-AS1      | Homo sapiens ZSWIM8 antisense RNA 1 (ZSWIM8-AS1), long non-coding RNA [NR_038357]                                  |
| A_23_P63789    | 0,012706506 up   | 1,5533699 ZWINT          | Homo sapiens ZW10 interacting kinetochore protein (ZWINT), transcript variant 2, mRNA [NM_032997]                  |
| A_24_P282108   | 0,001146444 up   | 1,5750476 ZZEF1          | Homo sapiens zinc finger, ZZ-type with EF-hand domain 1 (ZZEF1), mRNA [NM_015113]                                  |
| A_33_P3319026  | 4,57E-04 up      | 1,5878677 ZZZ3           | Homo sapiens zinc finger, ZZ-type containing 3 (ZZZ3), mRNA [NM_015534]                                            |
