# Supplementary material for: Early Reduction of SARS-CoV-2 Replication in Bronchial Epithelium by Kinin B2 Receptor Antagonism
Source: bioRxiv or medRxiv preprint supplement (doi:10.1101/2021.08.13.21262037), 2021-08-18
Supplement: Supplementary file [file media-8.pdf]

**Supplemental Table S6.** DEGs of antiviral epithelial response comparing SARS-CoV-2 versus medium

| ProbeName     | p           | (SARS-CoV-Regulatic | FC         | (SARS-C  | GeneSymbol                                                                                                                          | Description |
|---------------|-------------|---------------------|------------|----------|-------------------------------------------------------------------------------------------------------------------------------------|-------------|
| A_32_P9543    | 3,84E-05    | up                  | 9,134873   | APOBEC3A | Homo sapiens apolipoprotein B mRNA editing enzyme, catalytic polypeptide-like 3A (APOBEC3A), transcript variant 1, mRNA [NM_145699] |             |
| A_23_P409438  | 3,40E-04    | up                  | 3,081694   | IFNL2    | Homo sapiens interferon, lambda 2 (IFNL2), mRNA [NM_172138]                                                                         |             |
| A_23_P373619  | 0,001634764 | up                  | 4,4576945  | IFNL3    | Homo sapiens interferon, lambda 3 (IFNL3), mRNA [NM_172139]                                                                         |             |
| A_23_P71774   | 3,45E-06    | up                  | 5,655095   | IFNB1    | Homo sapiens interferon, beta 1, fibroblast (IFNB1), mRNA [NM_002176]                                                               |             |
| A_23_P120931  | 0,045707267 | down                | -1,5221866 | APOBEC3C | Homo sapiens apolipoprotein B mRNA editing enzyme, catalytic polypeptide-like 3C (APOBEC3C), mRNA [NM_014508]                       |             |
| A_23_P357101  | 0,043491352 | down                | -1,5244867 | APOBEC3F | Homo sapiens apolipoprotein B mRNA editing enzyme, catalytic polypeptide-like 3F (APOBEC3F), transcript variant 1, mRNA [NM_145298] |             |
| A_33_P3345086 | 0,030169737 | up                  | 1,61869    | IFNA7    | Homo sapiens interferon, alpha 7 (IFNA7), mRNA [NM_021057]                                                                          |             |
| A_23_P302060  | 0,01776837  | up                  | 1,8613136  | IFNE     | Homo sapiens interferon, epsilon (IFNE), mRNA [NM_176891]                                                                           |             |
| A_23_P337800  | 0,001176448 | up                  | 2,691211   | IFNL1    | Homo sapiens interferon, lambda 1 (IFNL1), mRNA [NM_172140]                                                                         |             |
| A_23_P139786  | 8,80E-04    | up                  | 3,6718917  | OASL     | Homo sapiens 2'-5'-oligoadenylate synthetase-like (OASL), transcript variant 1, mRNA [NM_003733]                                    |             |
| A_24_P66027   | 0,00480432  | up                  | 1,6422455  | APOBEC3B | Homo sapiens apolipoprotein B mRNA editing enzyme, catalytic polypeptide-like 3B (APOBEC3B), transcript variant 1, mRNA [NM_004900] |             |
| A_23_P68155   | 0,019437067 | up                  | 1,6737528  | IFIH1    | Homo sapiens interferon induced with helicase C domain 1 (IFIH1), mRNA [NM_022168]                                                  |             |
| A_33_P3418170 | 0,020984236 | up                  | 1,7916337  | DDX58    | Homo sapiens DEAD (Asp-Glu-Ala-Asp) box polypeptide 58 (DDX58), mRNA [NM_014314]                                                    |             |
