# Supplementary material for: Early Reduction of SARS-CoV-2 Replication in Bronchial Epithelium by Kinin B2 Receptor Antagonism
Source: bioRxiv or medRxiv preprint supplement (doi:10.1101/2021.08.13.21262037), 2021-08-18
Supplement: Supplementary file [file media-9.pdf]

**Supplemental Table S7. DEGs of antiviral epithelial response comparing SARS-CoV-2 versus medium**

| ProbeName     | p           | ([SARS-Cov-2:Regulatic FC | ([SARS-C   | GeneSymbol | Description                                                                                                                               |
|---------------|-------------|---------------------------|------------|------------|-------------------------------------------------------------------------------------------------------------------------------------------|
| A_23_P121533  | 2,38E-05    | down                      | -2,8165832 | SPON2      | Homo sapiens spondin 2, extracellular matrix protein (SPON2), transcript variant 1, mRNA [NM_012445]                                      |
| A_23_P150053  | 0,001929764 | down                      | -2,1835153 | ACTA2      | Homo sapiens actin, alpha 2, smooth muscle, aorta (ACTA2), transcript variant 2, mRNA [NM_001613]                                         |
| A_23_P165840  | 0,030665506 | down                      | -2,0057435 | ODC1       | Homo sapiens ornithine decarboxylase 1 (ODC1), transcript variant 1, mRNA [NM_002539]                                                     |
| A_32_P108474  | 0,008637361 | down                      | -1,5648061 | ABCE1      | Homo sapiens ATP-binding cassette, sub-family E (OABP), member 1 (ABCE1), transcript variant 1, mRNA [NM_002940]                          |
| A_24_P211151  | 0,003254394 | down                      | -1,92949   | EXOSC5     | Homo sapiens exosome component 5 (EXOSC5), mRNA [NM_020158]                                                                               |
| A_24_P225961  | 0,003420366 | down                      | -1,6345493 | DAG1       | Homo sapiens dystroglycan 1 (dystrophin-associated glycoprotein 1) (DAG1), transcript variant 2, mRNA [NM_004393]                         |
| A_23_P55998   | 0,041465864 | down                      | -1,8013846 | SLC1A5     | Homo sapiens solute carrier family 1 (neutral amino acid transporter), member 5 (SLC1A5), transcript variant 1, mRNA [NM_005628]          |
| A_23_P120931  | 0,045707267 | down                      | -1,5221866 | APOBEC3C   | Homo sapiens apolipoprotein B mRNA editing enzyme, catalytic polypeptide-like 3C (APOBEC3C), mRNA [NM_014508]                             |
| A_23_P357101  | 0,043491352 | down                      | -1,5244867 | APOBEC3F   | Homo sapiens apolipoprotein B mRNA editing enzyme, catalytic polypeptide-like 3F (APOBEC3F), transcript variant 1, mRNA [NM_145298]       |
| A_23_P211207  | 0,005282774 | down                      | -1,6142308 | ADARB1     | Homo sapiens adenosine deaminase, RNA-specific, B1 (ADARB1), transcript variant 1, mRNA [NM_001112]                                       |
| A_23_P91019   | 0,010147429 | down                      | -1,5265458 | PRKRA      | Homo sapiens protein kinase, interferon-inducible double stranded RNA dependent activator (PRKRA), transcript variant 1, mRNA [NM_003690] |
| A_33_P3317523 | 0,04932188  | down                      | -1,6132929 | STMN1      | Homo sapiens stathmin 1 (STMN1), transcript variant 1, mRNA [NM_203401]                                                                   |
| A_32_P9543    | 3,84E-05    | up                        | 9,134873   | APOBEC3A   | Homo sapiens apolipoprotein B mRNA editing enzyme, catalytic polypeptide-like 3A (APOBEC3A), transcript variant 1, mRNA [NM_145699]       |
| A_23_P409438  | 3,40E-04    | up                        | 3,081694   | IFNL2      | Homo sapiens interferon, lambda 2 (IFNL2), mRNA [NM_172138]                                                                               |
| A_23_P373619  | 0,001634764 | up                        | 4,4576945  | IFNL3      | Homo sapiens interferon, lambda 3 (IFNL3), mRNA [NM_172139]                                                                               |
| A_23_P71774   | 3,45E-06    | up                        | 5,655095   | IFNB1      | Homo sapiens interferon, beta 1, fibroblast (IFNB1), mRNA [NM_002176]                                                                     |
| A_33_P3351298 | 0,032510124 | up                        | 1,6358182  | CHRM2      | cholinergic receptor, muscarinic 2 [Source:HGNC Symbol;Acc:HGNC:1951] [ENST00000480591]                                                   |
| A_33_P3226420 | 0,021980299 | up                        | 1,9967993  | RSAD2      | radical S-adenosyl methionine domain containing 2 [Source:HGNC Symbol;Acc:HGNC:30908] [ENST00000474872]                                   |
| A_33_P3345086 | 0,030169737 | up                        | 1,61869    | IFNA7      | Homo sapiens interferon, alpha 7 (IFNA7), mRNA [NM_021057]                                                                                |
| A_23_P302060  | 0,01776837  | up                        | 1,8613136  | IFNE       | Homo sapiens interferon, epsilon (IFNE), mRNA [NM_176891]                                                                                 |
| A_33_P3340639 | 0,008225714 | up                        | 1,7341815  | GPAM       | glycerol-3-phosphate acyltransferase, mitochondrial [Source:HGNC Symbol;Acc:HGNC:24865] [ENST00000369425]                                 |
| A_23_P69109   | 0,001251698 | up                        | 1,6378775  | PLSCR1     | Homo sapiens phospholipid scramblase 1 (PLSCR1), mRNA [NM_021105]                                                                         |
| A_33_P3418170 | 0,020984236 | up                        | 1,7916337  | DDX58      | Homo sapiens DEAD (Asp-Glu-Ala-Asp) box polypeptide 58 (DDX58), mRNA [NM_014314]                                                          |
| A_23_P68155   | 0,019437067 | up                        | 1,6737528  | IFIH1      | Homo sapiens interferon induced with helicase C domain 1 (IFIH1), mRNA [NM_022168]                                                        |
| A_23_P500433  | 0,012565249 | up                        | 1,6471444  | CARD9      | Homo sapiens caspase recruitment domain family, member 9 (CARD9), transcript variant 1, mRNA [NM_052813]                                  |
| A_23_P69329   | 0,03443829  | up                        | 2,0992048  | HYAL1      | Homo sapiens hyaluronoglucosaminidase 1 (HYAL1), transcript variant 8, mRNA [NM_153281]                                                   |
| A_24_P66027   | 0,00480432  | up                        | 1,6422455  | APOBEC3B   | Homo sapiens apolipoprotein B mRNA editing enzyme, catalytic polypeptide-like 3B (APOBEC3B), transcript variant 1, mRNA [NM_004900]       |
| A_24_P178503  | 0,04903726  | up                        | 3,058975   | ABCC9      | Homo sapiens ATP-binding cassette, sub-family C (CFTR/MRP), member 9 (ABCC9), transcript variant SUR2A, mRNA [NM_005691]                  |
| A_23_P76078   | 0,045698304 | up                        | 1,8592229  | IL23A      | Homo sapiens interleukin 23, alpha subunit p19 (IL23A), mRNA [NM_016584]                                                                  |
| A_23_P61371   | 0,039991934 | up                        | 1,7341859  | TMEM173    | Homo sapiens transmembrane protein 173 (TMEM173), transcript variant 1, mRNA [NM_198282]                                                  |
| A_24_P53215   | 0,049799215 | up                        | 1,6423753  | UNC13D     | Homo sapiens unc-13 homolog D (C. elegans) (UNC13D), mRNA [NM_199242]                                                                     |
| A_33_P3462960 | 0,015330092 | up                        | 1,6635326  | DNAJC3     | Homo sapiens DnaJ (Hsp40) homolog, subfamily C, member 3 (DNAJC3), mRNA [NM_006260]                                                       |
| A_23_P4662    | 0,009302298 | up                        | 1,5956694  | BCL3       | Homo sapiens B-cell CLL/lymphoma 3 (BCL3), mRNA [NM_005178]                                                                               |
| A_24_P126060  | 0,03264237  | up                        | 1,5573117  | DDX3X      | Homo sapiens DEAD (Asp-Glu-Ala-Asp) box helicase 3, X-linked (DDX3X), transcript variant 1, mRNA [NM_001356]                              |
| A_23_P32404   | 0,003435594 | up                        | 1,610271   | ISG20      | Homo sapiens interferon stimulated exonuclease gene 20kDa (ISG20), transcript variant 1, mRNA [NM_002201]                                 |
| A_24_P139191  | 6,40E-04    | up                        | 1,7508626  | ITCH       | Homo sapiens itchy E3 ubiquitin protein ligase (ITCH), transcript variant 2, mRNA [NM_031483]                                             |
| A_23_P153320  | 0,007720421 | up                        | 2,796725   | ICAM1      | Homo sapiens intercellular adhesion molecule 1 (ICAM1), mRNA [NM_000201]                                                                  |
| A_23_P376488  | 0,002987986 | up                        | 4,1591763  | TNF        | Homo sapiens tumor necrosis factor (TNF), mRNA [NM_000594]                                                                                |
| A_23_P139786  | 8,80E-04    | up                        | 3,6718917  | OASL       | Homo sapiens 2'-5'-oligoadenylate synthetase-like (OASL), transcript variant 1, mRNA [NM_003733]                                          |
| A_23_P169437  | 0,004435565 | up                        | 2,1921763  | LCN2       | Homo sapiens lipocalin 2 (LCN2), mRNA [NM_005564]                                                                                         |
| A_23_P162300  | 0,019243024 | up                        | 2,4734468  | IRAK3      | Homo sapiens interleukin-1 receptor-associated kinase 3 (IRAK3), transcript variant 1, mRNA [NM_007199]                                   |

|              |                |                    |                                                                                                     |
|--------------|----------------|--------------------|-----------------------------------------------------------------------------------------------------|
| A_23_P337800 | 0,001176448 up | 2,691211 IFNL1     | Homo sapiens interferon, lambda 1 (IFNL1), mRNA [NM_172140]                                         |
| A_23_P55632  | 0,003332381 up | 3,7865973 SERPINB3 | Homo sapiens serpin peptidase inhibitor, clade B (ovalbumin), member 3 (SERPINB3), mRNA [NM_006919] |
