# Supplementary material for: Early Reduction of SARS-CoV-2 Replication in Bronchial Epithelium by Kinin B2 Receptor Antagonism
Source: bioRxiv or medRxiv preprint supplement (doi:10.1101/2021.08.13.21262037), 2021-08-18
Supplement: Supplementary file [file media-10.pdf]

**Supplemental Table S8.** Gene expression of members of the acute-phase response comparing SARS-CoV-2 versus medium

| ProbeName     | p ([SARS-Cov-: Regulatic FC ([SARS-C GeneSymbol Description |           |        |                                                                                                              |
|---------------|-------------------------------------------------------------|-----------|--------|--------------------------------------------------------------------------------------------------------------|
| A_32_P87013   | 2,51E-07 up                                                 | 11,469553 | CXCL8  | Homo sapiens chemokine (C-X-C motif) ligand 8 (CXCL8), mRNA [NM_000584]                                      |
| A_23_P71037   | 0,101391874 up                                              | 2,4503098 | IL6    | Homo sapiens interleukin 6 (IL6), mRNA [NM_000600]                                                           |
| A_23_P133408  | 0,26144698 up                                               | 2,5167227 | CSF2   | Homo sapiens colony stimulating factor 2 (granulocyte-macrophage) (CSF2), mRNA [NM_000758]                   |
| A_23_P376488  | 0,002987986 up                                              | 4,1591763 | TNF    | Homo sapiens tumor necrosis factor (TNF), mRNA [NM_000594]                                                   |
| A_33_P3316273 | 0,14624505 up                                               | 1,8288513 | CCL3   | Homo sapiens chemokine (C-C motif) ligand 3 (CCL3), mRNA [NM_002983]                                         |
| A_23_P72096   | 0,07817248 up                                               | 1,391977  | IL1A   | Homo sapiens interleukin 1, alpha (IL1A), mRNA [NM_000575]                                                   |
| A_23_P126735  | 0,18970466 up                                               | 1,4730885 | IL10   | Homo sapiens interleukin 10 (IL10), mRNA [NM_000572]                                                         |
| A_23_P89431   | 0,29730952 up                                               | 1,366798  | CCL2   | Homo sapiens chemokine (C-C motif) ligand 2 (CCL2), mRNA [NM_002982]                                         |
| A_33_P3407013 | 0,38391533 up                                               | 1,3638464 | IL6    | PREDICTED: Homo sapiens interleukin 6 (interferon, beta 2) (IL6), transcript variant X1, mRNA [XM_005249745] |
| A_24_P303091  | 0,3348003 up                                                | 1,6963456 | CXCL10 | Homo sapiens chemokine (C-X-C motif) ligand 10 (CXCL10), mRNA [NM_001565]                                    |
| A_23_P152838  | 0,4901788 up                                                | 1,369833  | CCL5   | Homo sapiens chemokine (C-C motif) ligand 5 (CCL5), transcript variant 1, mRNA [NM_002985]                   |
| A_33_P3343175 | 0,64367074 up                                               | 1,3233948 | CXCL10 | Homo sapiens chemokine (C-X-C motif) ligand 10 (CXCL10), mRNA [NM_001565]                                    |
