# Supplementary material for: Early Reduction of SARS-CoV-2 Replication in Bronchial Epithelium by Kinin B2 Receptor Antagonism
Source: bioRxiv or medRxiv preprint supplement (doi:10.1101/2021.08.13.21262037), 2021-08-18
Supplement: Supplementary file [file media-11.pdf]

**Supplemental Table S9.** Gene expression of members of RAS and KKS comparing SARS-CoV-2 versus medium

| ProbeName     | p ([SARS-CoV-2] Regulation) | (FC) ([SARS-CoV-2] vs Medium) | GeneSymbol | Description |                                                                                                                              |
|---------------|-----------------------------|-------------------------------|------------|-------------|------------------------------------------------------------------------------------------------------------------------------|
| A_24_P416645  | 0,15024692                  | up                            | 2,9355443  | KLK13       | Homo sapiens kallikrein-related peptidase 13 (KLK13), mRNA [NM_015596]                                                       |
| A_24_P333697  | 0,12090711                  | up                            | 2,249657   | KLK13       | Homo sapiens kallikrein-related peptidase 13 (KLK13), mRNA [NM_015596]                                                       |
| A_24_P236935  | 0,00131997                  | up                            | 2,2306533  | KLK6        | Homo sapiens kallikrein-related peptidase 6 (KLK6), transcript variant B, mRNA [NM_001012964]                                |
| A_33_P3235940 | 2,14E-04                    | up                            | 2,5737338  | KLK6        | Homo sapiens kallikrein-related peptidase 6 (KLK6), transcript variant B, mRNA [NM_001012964]                                |
| A_23_P101131  | 0,6882029                   | up                            | 1,0837805  | GRP         | Homo sapiens gastrin-releasing peptide (GRP), transcript variant 1, mRNA [NM_002091]                                         |
| A_33_P3259708 | 0,73542434                  | up                            | 1,1080414  | CMA1        | Homo sapiens chymase 1, mast cell (CMA1), mRNA [NM_001836]                                                                   |
| A_23_P4808    | 0,02388008                  | up                            | 1,7446251  | PTGER1      | Homo sapiens prostaglandin E receptor 1 (subtype EP1), 42kDa (PTGER1), mRNA [NM_000955]                                      |
| A_23_P34637   | 0,14624354                  | up                            | 1,4134759  | REN         | Homo sapiens renin (REN), mRNA [NM_000537]                                                                                   |
| A_23_P304897  | 0,04153157                  | up                            | 1,4415972  | BDKRB2      | Homo sapiens bradykinin receptor B2 (BDKRB2), mRNA [NM_000623]                                                               |
| A_23_P128744  | 0,27854535                  | up                            | 1,213907   | BDKRB1      | Homo sapiens bradykinin receptor B1 (BDKRB1), mRNA [NM_000710]                                                               |
| A_23_P16252   | 0,5514491                   | up                            | 1,2131916  | KLK1        | Homo sapiens kallikrein 1 (KLK1), mRNA [NM_002257]                                                                           |
| A_33_P3245183 | 0,07927634                  | up                            | 1,3502693  | HRH1        | Homo sapiens histamine receptor H1 (HRH1), transcript variant 1, mRNA [NM_001098213]                                         |
| A_33_P3413989 | 0,5090957                   | up                            | 1,2881964  | SERPING1    | Homo sapiens serpin peptidase inhibitor, clade G (C1 inhibitor), member 1 (SERPING1), transcript variant 1, mRNA [NM_000062] |
| A_33_P3296479 | 0,74465394                  | down                          | -1,0623248 | APP         | Homo sapiens amyloid beta (A4) precursor protein (APP), transcript variant 10, mRNA [NM_001204303]                           |
| A_23_P11353   | 0,5416322                   | down                          | -1,0638071 | ATP6AP2     | Homo sapiens ATPase, H+ transporting, lysosomal accessory protein 2 (ATP6AP2), mRNA [NM_005765]                              |
| A_33_P3290707 | 0,7751802                   | up                            | 1,0692633  | MME         | Homo sapiens membrane metallo-endopeptidase (MME), transcript variant 2b, mRNA [NM_007289]                                   |
| A_23_P252981  | 0,16595131                  | up                            | 1,5016031  | ACE2        | Homo sapiens angiotensin I converting enzyme 2 (ACE2), mRNA [NM_021804]                                                      |
| A_21_P0000025 | 0,5958493                   | up                            | 1,1578906  | NOS3        | Homo sapiens nitric oxide synthase 3 (endothelial cell) (NOS3), transcript variant 2, mRNA [NM_001160109]                    |
| A_33_P3305790 | 0,6480025                   | up                            | 1,0676521  | NOS3        | Homo sapiens nitric oxide synthase 3 (endothelial cell) (NOS3), transcript variant 1, mRNA [NM_000603]                       |
| A_33_P3413987 | 0,43816745                  | up                            | 1,2068092  | SERPING1    | Homo sapiens serpin peptidase inhibitor, clade G (C1 inhibitor), member 1 (SERPING1), transcript variant 1, mRNA [NM_000062] |
| A_33_P3229288 | 0,6186387                   | up                            | 1,0869983  | ACE         | Homo sapiens angiotensin I converting enzyme (ACE), transcript variant 1, mRNA [NM_000789]                                   |
| A_33_P3215838 | 0,5450845                   | down                          | -1,1113249 | KLK3        | kallikrein-related peptidase 3 [Source:HGNC Symbol;Acc:HGNC:6364] [ENST00000595151]                                          |
| A_23_P98147   | 0,765945                    | up                            | 1,0595655  | CPN1        | Homo sapiens carboxypeptidase N, polypeptide 1 (CPN1), mRNA [NM_001308]                                                      |
| A_23_P252236  | 0,16494894                  | up                            | 1,4089898  | KLKB1       | Homo sapiens kallikrein B, plasma (Fletcher factor) 1 (KLKB1), mRNA [NM_000892]                                              |
| A_23_P139123  | 0,2989573                   | down                          | -1,6766678 | SERPING1    | Homo sapiens serpin peptidase inhibitor, clade G (C1 inhibitor), member 1 (SERPING1), transcript variant 1, mRNA [NM_000062] |
| A_23_P115261  | 0,46579316                  | down                          | -1,2198637 | AGT         | Homo sapiens angiotensinogen (serpin peptidase inhibitor, clade A, member 8) (AGT), mRNA [NM_000029]                         |
| A_23_P148047  | 1                           | down                          | -1,7319175 | PTGER4      | Homo sapiens prostaglandin E receptor 4 (subtype EP4) (PTGER4), mRNA [NM_000958]                                             |
| A_33_P3233871 | 5,25E-04                    | down                          | -1,863506  | F12         | Homo sapiens coagulation factor XII (Hageman factor) (F12), mRNA [NM_000505]                                                 |
| A_23_P127964  | 0,10364446                  | down                          | -1,3418982 | PRCP        | Homo sapiens prolylcarboxypeptidase (angiotensinase C) (PRCP), transcript variant 2, mRNA [NM_199418]                        |
| A_23_P37910   | 0,4741085                   | up                            | 1,1568551  | MAPK3       | Homo sapiens mitogen-activated protein kinase 3 (MAPK3), transcript variant 1, mRNA [NM_002746]                              |
| A_24_P260101  | 1                           | down                          | -1,1484418 | MME         | Homo sapiens membrane metallo-endopeptidase (MME), transcript variant 2b, mRNA [NM_007289]                                   |
| A_33_P3370094 | 0,9790554                   | up                            | 1,0063342  | MME         | Homo sapiens membrane metallo-endopeptidase (MME), transcript variant 2b, mRNA [NM_007289]                                   |
| A_33_P3508822 | 0,786705                    | down                          | -1,0665829 | APP         | Homo sapiens amyloid beta (A4) precursor protein (APP), transcript variant 1, mRNA [NM_000484]                               |
| A_23_P214821  | 0,2440996                   | up                            | 1,4510032  | EDN1        | Homo sapiens endothelin 1 (EDN1), transcript variant 1, mRNA [NM_001955]                                                     |
| A_33_P3258392 | 0,40472084                  | up                            | 1,2779604  | EDN1        | Homo sapiens endothelin 1 (EDN1), transcript variant 1, mRNA [NM_001955]                                                     |
| A_33_P3265749 | 0,83497095                  | up                            | 1,0902357  | PTGER3      | Homo sapiens prostaglandin E receptor 3 (subtype EP3) (PTGER3), transcript variant 7, mRNA [NM_198717]                       |
| A_23_P151778  | 0,27874944                  | up                            | 1,5235522  | CMA1        | Homo sapiens chymase 1, mast cell (CMA1), mRNA [NM_001836]                                                                   |
| A_33_P3413993 | 0,30919817                  | up                            | 1,228207   | SERPING1    | serpin peptidase inhibitor, clade G (C1 inhibitor), member 1 [Source:HGNC Symbol;Acc:HGNC:1228] [ENST00000405496]            |
| A_33_P3265744 | 0,44538012                  | up                            | 1,14883    | PTGER3      | Homo sapiens prostaglandin E receptor 3 (subtype EP3) (PTGER3), transcript variant 5, mRNA [NM_198715]                       |
| A_23_P151710  | 0,7410629                   | down                          | -1,0890169 | PTGER2      | Homo sapiens prostaglandin E receptor 2 (subtype EP2), 53kDa (PTGER2), mRNA [NM_000956]                                      |
| A_23_P212258  | 0,5087776                   | up                            | 1,2136151  | KNG1        | Homo sapiens kininogen 1 (KNG1), transcript variant 2, mRNA [NM_000893]                                                      |

|               |               |                    |                                                                                                                                         |
|---------------|---------------|--------------------|-----------------------------------------------------------------------------------------------------------------------------------------|
| A_23_P25720   | 0,46624374 up | 1,2555822 SERPINA4 | Homo sapiens serpin peptidase inhibitor, clade A (alpha-1 antiproteinase, antitrypsin), member 4 (SERPINA4), transcript variant 3, mRNA |
| A_33_P3376493 | 0,16948764 up | 1,5416175 AGTR2    | Homo sapiens angiotensin II receptor, type 2 (AGTR2), mRNA [NM_000686]                                                                  |
| A_23_P166616  | 0,13536854 up | 1,3171386 AGTR1    | Homo sapiens angiotensin II receptor, type 1 (AGTR1), transcript variant 4, mRNA [NM_031850]                                            |
| A_33_P3411338 | 0,03315813 up | 1,5271437 ENPEP    | Homo sapiens glutamyl aminopeptidase (aminopeptidase A) (ENPEP), mRNA [NM_001977]                                                       |
| A_23_P62309   | 0,12392495 up | 1,378373 AGTR2     | Homo sapiens angiotensin II receptor, type 2 (AGTR2), mRNA [NM_000686]                                                                  |
| A_33_P3215843 | 0,20070823 up | 1,2512552 KLK3     | Homo sapiens kallikrein-related peptidase 3 (KLK3), transcript variant 3, mRNA [NM_001030047]                                           |
| A_33_P3265739 | 0,368766 up   | 1,2127178 PTGER3   | Homo sapiens prostaglandin E receptor 3 (subtype EP3) (PTGER3), transcript variant 9, mRNA [NM_198719]                                  |
| A_23_P103328  | 0,15274443 up | 1,2889884 PTGER3   | Homo sapiens prostaglandin E receptor 3 (subtype EP3) (PTGER3), transcript variant 4, mRNA [NM_198714]                                  |
| A_24_P38290   | 0,05213348 up | 1,4935644 TAC1     | Homo sapiens tachykinin, precursor 1 (TAC1), transcript variant beta, mRNA [NM_003182]                                                  |
| A_33_P3251065 | 0,56487787 up | 1,1569742 KLK13    | kallikrein-related peptidase 13 [Source:HGNC Symbol;Acc:HGNC:6361] [ENST00000602090]                                                    |
