# Supplementary material for: Early Reduction of SARS-CoV-2 Replication in Bronchial Epithelium by Kinin B2 Receptor Antagonism
Source: bioRxiv or medRxiv preprint supplement (doi:10.1101/2021.08.13.21262037), 2021-08-18
Supplement: Supplementary file [file media-12.pdf]

**Supplemental Table S10.** Differentially expressed interleukins comparing SARS-CoV-2 versus medium

| ProbeName     | p           | ([SARS-CoV- Reg | atic FC    | ([SARS-C | GeneSymbol                                                                                              | Description |
|---------------|-------------|-----------------|------------|----------|---------------------------------------------------------------------------------------------------------|-------------|
| A_33_P3211608 | 3,97E-02    | up              | 2,974933   | IL1RL1   | Homo sapiens interleukin 1 receptor-like 1 (IL1RL1), transcript variant 4, non-coding RNA [NR_104167]   |             |
| A_23_P17053   | 6,39262E-05 | up              | 6,132556   | IL36G    | Homo sapiens interleukin 36, gamma (IL36G), transcript variant 1, mRNA [NM_019618]                      |             |
| A_33_P3339625 | 1,17303E-05 | up              | 16,473091  | IL17C    | Homo sapiens interleukin 17C (IL17C), mRNA [NM_013278]                                                  |             |
| A_33_P3243230 | 1,76904E-07 | up              | 16,647413  |          | HSINTLK8M interleukin 8 {Homo sapiens} (exp=-1; wgp=0; cg=0), partial (97%) [THC2544321]                |             |
| A_32_P223777  | 0,00139653  | up              | 1,9878159  | IL6ST    | Homo sapiens interleukin 6 signal transducer (IL6ST), transcript variant 1, mRNA [NM_002184]            |             |
| A_23_P76078   | 0,045698304 | up              | 1,8592229  | IL23A    | Homo sapiens interleukin 23, alpha subunit p19 (IL23A), mRNA [NM_016584]                                |             |
| A_23_P336554  | 0,00221631  | up              | 1,7976834  | IL1RAP   | Homo sapiens interleukin 1 receptor accessory protein (IL1RAP), transcript variant 2, mRNA [NM_134470]  |             |
| A_33_P3251876 | 0,03411692  | up              | 1,5917065  | IL18R1   | Homo sapiens interleukin 18 receptor 1 (IL18R1), transcript variant 1, mRNA [NM_003855]                 |             |
| A_33_P3211666 | 0,026903022 | up              | 1,5705488  | IL18R1   | Homo sapiens interleukin 18 receptor 1 (IL18R1), transcript variant 1, mRNA [NM_003855]                 |             |
| A_23_P90925   | 0,004416244 | up              | 2,695789   | IL36B    | Homo sapiens interleukin 36, beta (IL36B), transcript variant 2, mRNA [NM_173178]                       |             |
| A_24_P68783   | 0,000239245 | up              | 2,834167   | IL36RN   | Homo sapiens interleukin 36 receptor antagonist (IL36RN), transcript variant 1, mRNA [NM_012275]        |             |
| A_23_P162300  | 0,019243024 | up              | 2,4734468  | IRAK3    | Homo sapiens interleukin-1 receptor-associated kinase 3 (IRAK3), transcript variant 1, mRNA [NM_007199] |             |
| A_33_P3352970 | 7,91E-05    | up              | 2,3658743  | IRAK2    | Homo sapiens interleukin-1 receptor-associated kinase 2 (IRAK2), mRNA [NM_001570]                       |             |
| A_33_P3396389 | 1,43E-03    | up              | 2,20656    | IL1R1    | Homo sapiens interleukin 1 receptor, type I (IL1R1), transcript variant 1, mRNA [NM_000877]             |             |
| A_33_P3246833 | 0,000372491 | up              | 2,0205843  | IL1RN    | Homo sapiens interleukin 1 receptor antagonist (IL1RN), transcript variant 4, mRNA [NM_173843]          |             |
| A_33_P3246829 | 3,02E-04    | up              | 2,0667813  | IL1RN    | Homo sapiens interleukin 1 receptor antagonist (IL1RN), transcript variant 4, mRNA [NM_173843]          |             |
| A_33_P3395947 | 0,049509153 | down            | -1,6004809 | IL4R     | Homo sapiens interleukin 4 receptor (IL4R), transcript variant 4, mRNA [NM_001257407]                   |             |
| A_33_P3243887 | 0,041839596 | down            | -1,7166973 | IL11     | Homo sapiens interleukin 11 (IL11), transcript variant 1, mRNA [NM_000641]                              |             |
| A_24_P203000  | 0,016171468 | down            | -2,173952  | IL2RB    | Homo sapiens interleukin 2 receptor, beta (IL2RB), mRNA [NM_000878]                                     |             |
| A_23_P345692  | 0,001358746 | down            | -3,1651986 | IL17D    | Homo sapiens interleukin 17D (IL17D), mRNA [NM_138284]                                                  |             |
| A_33_P3219745 | 0,03622351  | down            | -1,9250232 | ILF2     | interleukin enhancer binding factor 2 [Source:HGNC Symbol;Acc:HGNC:6037] [ENST00000368681]              |             |
| A_23_P61057   | 0,044333362 | down            | -1,8543203 | IL16     | Homo sapiens interleukin 16 (IL16), transcript variant 1, mRNA [NM_004513]                              |             |
| A_23_P35092   | 0,011103406 | up              | 1,8246565  | IL19     | Homo sapiens interleukin 19 (IL19), transcript variant 1, mRNA [NM_153758]                              |             |
| A_23_P46482   | 0,007016526 | down            | -2,929152  | IL20     | Homo sapiens interleukin 20 (IL20), mRNA [NM_018724]                                                    |             |
| A_23_P104798  | 0,013057214 | down            | -1,5936793 | IL18     | Homo sapiens interleukin 18 (IL18), transcript variant 1, mRNA [NM_001562]                              |             |
| A_33_P3288844 | 0,035492603 | down            | -1,7655479 | IL6R     | Homo sapiens interleukin 6 receptor (IL6R), transcript variant 1, mRNA [NM_000565]                      |             |
| A_21_P0000171 | 0,004423897 | down            | -1,7600982 | IL6R     | Homo sapiens interleukin 6 receptor (IL6R), transcript variant 3, mRNA [NM_001206866]                   |             |
| A_23_P32253   | 0,007869842 | down            | -1,5080216 | NFIL3    | Homo sapiens nuclear factor, interleukin 3 regulated (NFIL3), transcript variant 3, mRNA [NM_005384]    |             |
| A_33_P3399267 | 0,0328938   | down            | -1,7424508 | IL15RA   | Homo sapiens interleukin 15 receptor, alpha (IL15RA), transcript variant 2, mRNA [NM_172200]            |             |
