# Supplementary material for: Early Reduction of SARS-CoV-2 Replication in Bronchial Epithelium by Kinin B2 Receptor Antagonism
Source: bioRxiv or medRxiv preprint supplement (doi:10.1101/2021.08.13.21262037), 2021-08-18
Supplement: Supplementary file [file media-13.pdf]

**Supplemental Table S11.** Potential viral entry receptor DEGs comparing SARS-CoV-2 versus medium

| ProbeName     | p ([SARS-CoV-2] vs [Regulatic FC ([SARS-CoV-2] vs [medium])]) | FC        | GeneSymbol | Description                                                                                         |
|---------------|---------------------------------------------------------------|-----------|------------|-----------------------------------------------------------------------------------------------------|
| A_24_P186539  | 0,04956434 up                                                 | 1,6313815 | CD209      | Homo sapiens CD209 molecule (CD209), transcript variant 1, mRNA [NM_021155]                         |
| A_33_P3374678 | 9,62E-03 up                                                   | 2,0423372 | TMPRSS11D  | Homo sapiens transmembrane protease, serine 11D (TMPRSS11D), mRNA [NM_004262]                       |
| A_33_P3217845 | 4,27E-03 up                                                   | 3,431767  | TMPRSS11A  | Homo sapiens transmembrane protease, serine 11A (TMPRSS11A), transcript variant 1, mRNA [NM_182606] |
| A_24_P109101  | 3,59E-02 up                                                   | 3,0592778 | TMPRSS11A  | Homo sapiens transmembrane protease, serine 11A (TMPRSS11A), transcript variant 1, mRNA [NM_182606] |
