# Supplementary material for: Early Reduction of SARS-CoV-2 Replication in Bronchial Epithelium by Kinin B2 Receptor Antagonism
Source: bioRxiv or medRxiv preprint supplement (doi:10.1101/2021.08.13.21262037), 2021-08-18
Supplement: Supplementary file [file media-14.pdf]

**Supplemental Table S12.** Toll-like receptor (TLR) DEGs comparing SARS-CoV-2 versus medium

| ProbeName    | p ([SARS-CoV-2] vs [Regulatory]) | FC ([SARS-CoV-2] vs [Regulatory]) | Gene | Description                                                |
|--------------|----------------------------------|-----------------------------------|------|------------------------------------------------------------|
| A_23_P92499  | 0,022723636 up                   | 3,1690073                         | TLR2 | Homo sapiens toll-like receptor 2 (TLR2), mRNA [NM_003264] |
| A_23_P10873  | 0,02445174 up                    | 1,9784745                         | TLR1 | Homo sapiens toll-like receptor 1 (TLR1), mRNA [NM_003263] |
| A_33_P326342 | 0,005945041 up                   | 1,5899574                         | TLR5 | Homo sapiens toll-like receptor 5 (TLR5), mRNA [NM_003268] |
