# Supplementary material for: Early Reduction of SARS-CoV-2 Replication in Bronchial Epithelium by Kinin B2 Receptor Antagonism
Source: bioRxiv or medRxiv preprint supplement (doi:10.1101/2021.08.13.21262037), 2021-08-18
Supplement: Supplementary file [file media-15.pdf]

**Supplemental Table S13.** Chemokine DEGs comparing SARS-CoV-2 versus medium

| ProbeName     | p ([Cov2] Vs [M Regulatic | FC ([Cov2] V | GeneSynr | Description                                                                                                                                                                                                                     |
|---------------|---------------------------|--------------|----------|---------------------------------------------------------------------------------------------------------------------------------------------------------------------------------------------------------------------------------|
| A_23_P121596  | 0,002959288 up            | 2,6544087    | PPBP     | Homo sapiens pro-platelet basic protein (chemokine (C-X-C motif) ligand 7) (PPBP), mRNA [NM_002704]                                                                                                                             |
| A_23_P50269   | 0,018069379 up            | 2,2989175    | CXCL17   | Homo sapiens chemokine (C-X-C motif) ligand 17 (CXCL17), mRNA [NM_198477]                                                                                                                                                       |
| A_24_P183150  | 0,00165627 up             | 2,7300987    | CXCL3    | Homo sapiens chemokine (C-X-C motif) ligand 3 (CXCL3), mRNA [NM_002090]                                                                                                                                                         |
| A_24_P257416  | 1,25E-04 up               | 2,7464068    | CXCL2    | Homo sapiens chemokine (C-X-C motif) ligand 2 (CXCL2), mRNA [NM_002089]                                                                                                                                                         |
| A_23_P315364  | 0,006391583 up            | 2,3417945    | CXCL2    | Homo sapiens chemokine (C-X-C motif) ligand 2 (CXCL2), mRNA [NM_002089]                                                                                                                                                         |
| A_23_P69012   | 0,012230188 up            | 2,2441964    | CCR8     | Homo sapiens chemokine (C-C motif) receptor 8 (CCR8), mRNA [NM_005201]                                                                                                                                                          |
| A_23_P67932   | 0,03768801 up             | 1,577224     | CXCR1    | Homo sapiens chemokine (C-X-C motif) receptor 1 (CXCR1), mRNA [NM_000634]                                                                                                                                                       |
| A_23_P211699  | 0,006295188 up            | 2,1925251    |          | CCR8_HUMAN (P51685) C-C chemokine receptor type 8 (C-C CKR-8) (CC-CKR-8) (CCR-8) (GPR-CY6) (GPCY6) (Chemokine receptor-like 1) (CKR-L1) (TER1) (CMKBRL2) (CC-chemokine receptor CHEMR1) (CDw198 antigen), complete [THC2477815] |
| A_33_P3354607 | 0,001333996 up            | 2,4903448    | CCL4L2   | Homo sapiens chemokine (C-C motif) ligand 4-like 2 (CCL4L2), transcript variant CCL4L2b2, mRNA [NM_001291470]                                                                                                                   |
| A_23_P17065   | 2,48E-05 up               | 7,191096     | CCL20    | Homo sapiens chemokine (C-C motif) ligand 20 (CCL20), transcript variant 1, mRNA [NM_004591]                                                                                                                                    |
| A_32_P87013   | 2,51E-07 up               | 11,469553    | CXCL8    | Homo sapiens chemokine (C-X-C motif) ligand 8 (CXCL8), mRNA [NM_000584]                                                                                                                                                         |
| A_33_P3330264 | 5,94E-05 up               | 4,943028     | CXCL1    | Homo sapiens chemokine (C-X-C motif) ligand 1 (melanoma growth stimulating activity, alpha) (CXCL1), transcript variant 1, mRNA [NM_001511]                                                                                     |
| A_23_P7144    | 1,86E-05 up               | 6,293819     | CXCL1    | Homo sapiens chemokine (C-X-C motif) ligand 1 (melanoma growth stimulating activity, alpha) (CXCL1), transcript variant 1, mRNA [NM_001511]                                                                                     |
