# Supplementary material for: Early Reduction of SARS-CoV-2 Replication in Bronchial Epithelium by Kinin B2 Receptor Antagonism
Source: bioRxiv or medRxiv preprint supplement (doi:10.1101/2021.08.13.21262037), 2021-08-18
Supplement: Supplementary file [file media-16.pdf]

**Supplemental Table S14.** Gene expression of potential viral entry receptors comparing SARS-CoV-2 versus medium

| ProbeName     | p ([SARS-CoV-2] Regulatic FC ([SARS-CoV-2] vs medium) | FC ([SARS-CoV-2] vs medium) | GeneSymbol | Description                                                                                            |
|---------------|-------------------------------------------------------|-----------------------------|------------|--------------------------------------------------------------------------------------------------------|
| A_33_P3272493 | 0,41989717 up                                         | 13.300.666                  | CD209      | Homo sapiens CD209 molecule (CD209), transcript variant 4, mRNA [NM_001144897]                         |
| A_24_P246196  | 0,16616632 up                                         | 14.499.686                  | CLEC4M     | Homo sapiens C-type lectin domain family 4, member M (CLEC4M), transcript variant 3, mRNA [NM_0011449] |
| A_23_P29067   | 0,1234412 up                                          | 13.455.415                  | TMPRSS2    | Homo sapiens transmembrane protease, serine 2 (TMPRSS2), transcript variant 2, mRNA [NM_005656]        |
| A_33_P3287223 | 0,5507992 up                                          | 14.774.978                  | DPP4       | Homo sapiens dipeptidyl-peptidase 4 (DPP4), mRNA [NM_001935]                                           |
| A_24_P186539  | 0,04956434 up                                         | 16.313.815                  | CD209      | Homo sapiens CD209 molecule (CD209), transcript variant 1, mRNA [NM_021155]                            |
| A_23_P143120  | 0,03504883 up                                         | 12.945.154                  | ADAM17     | Homo sapiens ADAM metalloproteinase domain 17 (ADAM17), mRNA [NM_003183]                               |
| A_33_P3243857 | 0,22771475 up                                         | 11.777.034                  | ADAM10     | Homo sapiens ADAM metalloproteinase domain 10 (ADAM10), mRNA [NM_001110]                               |
| A_23_P48886   | 0,17386465 up                                         | 12.107.117                  | ADAM10     | Homo sapiens ADAM metalloproteinase domain 10 (ADAM10), mRNA [NM_001110]                               |
| A_24_P305345  | 0,60484207 up                                         | 10.998.168                  | CD209      | Homo sapiens CD209 molecule (CD209), transcript variant 1, mRNA [NM_021155]                            |
| A_23_P252981  | 0,16595131 up                                         | 15.016.031                  | ACE2       | Homo sapiens angiotensin I converting enzyme 2 (ACE2), mRNA [NM_021804]                                |
| A_23_P208482  | 0,14751089 up                                         | 14.619.298                  | CLEC4M     | Homo sapiens C-type lectin domain family 4, member M (CLEC4M), transcript variant 2, mRNA [NM_0011449] |
| A_33_P3318097 | 0,37764555 up                                         | 17.235.893                  | TMPRSS11B  | Homo sapiens transmembrane protease, serine 11B (TMPRSS11B), mRNA [NM_182502]                          |
| A_23_P18751   | 0,2665045 up                                          | 1.731.451                   | TMPRSS11E  | Homo sapiens transmembrane protease, serine 11E (TMPRSS11E), mRNA [NM_014058]                          |
| A_33_P3374678 | 0,009622896 up                                        | 20.423.372                  | TMPRSS11D  | Homo sapiens transmembrane protease, serine 11D (TMPRSS11D), mRNA [NM_004262]                          |
| A_33_P3217845 | 0,004265649 up                                        | 3.431.767                   | TMPRSS11A  | Homo sapiens transmembrane protease, serine 11A (TMPRSS11A), transcript variant 1, mRNA [NM_182606]    |
| A_24_P109101  | 0,035911784 up                                        | 30.592.778                  | TMPRSS11A  | Homo sapiens transmembrane protease, serine 11A (TMPRSS11A), transcript variant 1, mRNA [NM_182606]    |
