# Supplementary material for: Early Reduction of SARS-CoV-2 Replication in Bronchial Epithelium by Kinin B2 Receptor Antagonism
Source: bioRxiv or medRxiv preprint supplement (doi:10.1101/2021.08.13.21262037), 2021-08-18
Supplement: Supplementary file [file media-18.pdf]

**Supplemental Table S16.** Membrane-bound receptor DEGs comparing SARS-CoV-2 + B2R antagonist versus SARS-CoV-2 (P <= 0.05; FC >=2.5)

| ProbeName  | p ([SARS-CoV-2 Regulation]) | (FC) | (SARS-CoV-2 GeneSymbol) | Description |                                                                                                                                                |
|------------|-----------------------------|------|-------------------------|-------------|------------------------------------------------------------------------------------------------------------------------------------------------|
| A_33_P3259 | 0,00707328                  | down | -4,365351               | OR6P1       | Homo sapiens olfactory receptor, family 6, subfamily P, member 1 (OR6P1), mRNA [NM_001160325]                                                  |
| A_23_P3159 | 2,55E-04                    | down | -4,965023               | OR10A5      | Homo sapiens olfactory receptor, family 10, subfamily A, member 5 (OR10A5), mRNA [NM_178168]                                                   |
| A_23_P3194 | 0,00103116                  | down | -3,493477               | KCNK5       | Homo sapiens potassium channel, two pore domain subfamily K, member 5 (KCNK5), mRNA [NM_003740]                                                |
| A_23_P1583 | 2,04E-04                    | down | -3,2454913              | OR1D5       | Homo sapiens olfactory receptor, family 1, subfamily D, member 5 (OR1D5), mRNA [NM_014566]                                                     |
| A_23_P1689 | 0,003327                    | down | -3,0895123              | ADRB3       | Homo sapiens adrenoceptor beta 3 (ADRB3), mRNA [NM_000025]                                                                                     |
| A_33_P3262 | 0,00572064                  | down | -2,7597675              | OR2AG2      | Homo sapiens olfactory receptor, family 2, subfamily AG, member 2 (OR2AG2), mRNA [NM_001004490]                                                |
| A_24_P7965 | 0,01767049                  | down | -3,0306885              | ESRRG       | Homo sapiens estrogen-related receptor gamma (ESRRG), transcript variant 2, mRNA [NM_206594]                                                   |
| A_23_P1568 | 8,35E-06                    | down | -3,658279               | HTR1B       | Homo sapiens 5-hydroxytryptamine (serotonin) receptor 1B, G protein-coupled (HTR1B), mRNA [NM_000863]                                          |
| A_23_P2467 | 0,01071806                  | down | -2,850212               | OR8U1       | Homo sapiens olfactory receptor, family 8, subfamily U, member 1 (OR8U1), mRNA [NM_001005204]                                                  |
| A_23_P1626 | 6,94E-04                    | down | -3,8409832              | STAB2       | Homo sapiens stabilin 2 (STAB2), mRNA [NM_017564]                                                                                              |
| A_23_P5176 | 0,00821699                  | down | -5,356401               | OR6K2       | Homo sapiens olfactory receptor, family 6, subfamily K, member 2 (OR6K2), mRNA [NM_001005279]                                                  |
| A_23_P2710 | 0,00357729                  | down | -3,6172636              | TM4SF5      | Homo sapiens transmembrane 4 L six family member 5 (TM4SF5), mRNA [NM_003963]                                                                  |
| A_33_P3314 | 5,65E-04                    | down | -2,5952857              | CRACR2A     | Homo sapiens calcium release activated channel regulator 2A (CRACR2A), transcript variant 1, mRNA [NM_001144958]                               |
| A_33_P3345 | 0,00400523                  | down | -2,5235734              | HTR6        | Homo sapiens 5-hydroxytryptamine (serotonin) receptor 6, G protein-coupled (HTR6), mRNA [NM_000871]                                            |
| A_24_P3506 | 0,02168956                  | down | -2,5401216              | KIR2DL4     | Homo sapiens killer cell immunoglobulin-like receptor, two domains, long cytoplasmic tail, 4 (KIR2DL4), transcript variant 1, mRNA [NM_002255] |
| A_24_P7921 | 0,00670627                  | down | -2,949434               | SCN9A       | Homo sapiens sodium channel, voltage gated, type IX alpha subunit (SCN9A), mRNA [NM_002977]                                                    |
| A_33_P3280 | 0,03306894                  | down | -3,169259               | CACNA1B     | Homo sapiens calcium channel, voltage-dependent, N type, alpha 1B subunit (CACNA1B), transcript variant 2, mRNA [NM_001243812]                 |
| A_33_P3243 | 0,00379402                  | down | -2,5622954              | KCNU1       | Homo sapiens potassium channel, subfamily U, member 1 (KCNU1), mRNA [NM_001031836]                                                             |
| A_33_P3405 | 6,09E-04                    | down | -2,5182621              | TARM1       | Homo sapiens T cell-interacting, activating receptor on myeloid cells 1 (TARM1), mRNA [NM_001135686]                                           |
| A_23_P5872 | 0,00943444                  | down | -2,8295608              | SLC34A1     | Homo sapiens solute carrier family 34 (type II sodium/phosphate cotransporter), member 1 (SLC34A1), transcript variant 1, mRNA [NM_003052]     |
| A_33_P3295 | 2,88E-04                    | down | -3,3100839              | MS4A2       | Homo sapiens membrane-spanning 4-domains, subfamily A, member 2 (MS4A2), transcript variant 1, mRNA [NM_000139]                                |
| A_23_P8596 | 0,00784953                  | down | -2,8825476              | OR6Y1       | Homo sapiens olfactory receptor, family 6, subfamily Y, member 1 (OR6Y1), mRNA [NM_001005189]                                                  |
| A_33_P3342 | 0,00291116                  | down | -2,5372047              | TIGIT       | Homo sapiens T cell immunoreceptor with Ig and ITIM domains (TIGIT), mRNA [NM_173799]                                                          |
| A_33_P3235 | 0,0153642                   | down | -2,5404625              | TIGIT       | Homo sapiens T cell immunoreceptor with Ig and ITIM domains (TIGIT), mRNA [NM_173799]                                                          |
| A_23_P1274 | 0,01751062                  | down | -2,5118883              | MRC1        | Homo sapiens mannose receptor, C type 1 (MRC1), mRNA [NM_002438]                                                                               |
| A_23_P8168 | 0,00596197                  | down | -2,900122               | GPRC6A      | Homo sapiens G protein-coupled receptor, class C, group 6, member A (GPRC6A), transcript variant 1, mRNA [NM_148963]                           |
| A_33_P3417 | 0,01487972                  | down | -2,569186               | NPSR1       | Homo sapiens neuropeptide S receptor 1 (NPSR1), transcript variant 4, mRNA [NM_001300934]                                                      |
| A_33_P3234 | 0,00211696                  | down | -2,629176               | IGDCC3      | Homo sapiens immunoglobulin superfamily, DCC subclass, member 3 (IGDCC3), mRNA [NM_004884]                                                     |
| A_24_P5229 | 0,0104476                   | down | -2,7451172              | OR2A25      | Homo sapiens olfactory receptor, family 2, subfamily A, member 25 (OR2A25), mRNA [NM_001004488]                                                |
| A_33_P3225 | 0,03421618                  | down | -2,5512295              | CD34        | Homo sapiens CD34 molecule (CD34), transcript variant 1, mRNA [NM_001025109]                                                                   |
| A_23_P1276 | 0,00735194                  | down | -2,6807091              | OR8D1       | Homo sapiens olfactory receptor, family 8, subfamily D, member 1 (OR8D1), mRNA [NM_001002917]                                                  |
| A_23_P4335 | 0,01820944                  | down | -2,549153               | MLANA       | Homo sapiens melan-A (MLANA), mRNA [NM_005511]                                                                                                 |
| A_23_P3918 | 1,56E-04                    | down | -3,0335839              | ESRRB       | Homo sapiens estrogen-related receptor beta (ESRRB), mRNA [NM_004452]                                                                          |
| A_24_P9768 | 0,01981213                  | down | -2,5974538              | HTR1A       | Homo sapiens 5-hydroxytryptamine (serotonin) receptor 1A, G protein-coupled (HTR1A), mRNA [NM_000524]                                          |
| A_23_P7586 | 0,02042555                  | down | -2,7280943              | OR10A4      | Homo sapiens olfactory receptor, family 10, subfamily A, member 4 (OR10A4), mRNA [NM_207186]                                                   |
| A_24_P2896 | 0,01360577                  | down | -2,7294364              | HFE         | Homo sapiens hemochromatosis (HFE), transcript variant 11, mRNA [NM_139011]                                                                    |
| A_23_P3442 | 0,01256995                  | down | -3,5274222              | KCNQ4       | Homo sapiens potassium channel, voltage gated KQT-like subfamily Q, member 4 (KCNQ4), transcript variant 1, mRNA [NM_004700]                   |
| A_24_P1171 | 0,005055                    | down | -2,8706326              | KIR3DL1     | Homo sapiens killer cell immunoglobulin-like receptor, three domains, long cytoplasmic tail, 1 (KIR3DL1), mRNA [NM_013289]                     |
| A_33_P3258 | 0,00421202                  | down | -2,5884864              | PCDHA5      | Homo sapiens protocadherin alpha 5 (PCDHA5), transcript variant 2, mRNA [NM_031501]                                                            |
| A_23_P3475 | 0,00443829                  | down | -2,5857582              | GRIN3A      | Homo sapiens glutamate receptor, ionotropic, N-methyl-D-aspartate 3A (GRIN3A), mRNA [NM_133445]                                                |
| A_33_P3263 | 0,00737022                  | down | -2,925967               | SEMA6B      | Homo sapiens sema domain, transmembrane domain (TM), and cytoplasmic domain, (semaphorin) 6B (SEMA6B), mRNA [NM_032108]                        |
| A_23_P3875 | 0,00370691                  | down | -2,592161               | PRRG3       | Homo sapiens proline rich Gla (G-carboxyglutamic acid) 3 (transmembrane) (PRRG3), transcript variant 1, mRNA [NM_024082]                       |
| A_23_P1119 | 0,02651563                  | down | -2,6335762              | KCNK9       | Homo sapiens potassium channel, two pore domain subfamily K, member 9 (KCNK9), transcript variant 1, mRNA [NM_001282534]                       |
| A_23_P1466 | 0,02109362                  | down | -2,6855488              | SLC28A1     | Homo sapiens solute carrier family 28 (concentrative nucleoside transporter), member 1 (SLC28A1), transcript variant 1, mRNA [NM_004213]       |
| A_23_P1352 | 6,52E-04                    | down | -2,69251                | OR1N2       | Homo sapiens olfactory receptor, family 1, subfamily N, member 2 (OR1N2), mRNA [NM_001004457]                                                  |
| A_23_P8545 | 0,00486417                  | down | -3,3950548              | CD244       | Homo sapiens CD244 molecule, natural killer cell receptor 2B4 (CD244), transcript variant 1, mRNA [NM_016382]                                  |
