# Supplementary material for: Early Reduction of SARS-CoV-2 Replication in Bronchial Epithelium by Kinin B2 Receptor Antagonism
Source: bioRxiv or medRxiv preprint supplement (doi:10.1101/2021.08.13.21262037), 2021-08-18
Supplement: Supplementary file [file media-19.pdf]

**Supplemental Table S17.** Interactions output of String network analysis of membrane-bound receptor DEGs comparing SARS-CoV-2 + B2R antagonist versus SARS-CoV-2

| #node1  | node2   | node1_string_id      | node2_string_id      | neight | gene_ | phylog | homolc | coexpr | experime | data | autom | combined_score |       |
|---------|---------|----------------------|----------------------|--------|-------|--------|--------|--------|----------|------|-------|----------------|-------|
| ADRB3   | RAMP2   | 9606.ENSP00000343782 | 9606.ENSP00000253796 | 0      | 0     | 0      | 0      | 0      | 0        | 0    | 0,9   | 0,055          | 0,901 |
| ADRB3   | GPR15   | 9606.ENSP00000343782 | 9606.ENSP00000284311 | 0      | 0     | 0      | 0,579  | 0      | 0        | 0    | 0,9   | 0,05           | 0,9   |
| ADRB3   | HTR6    | 9606.ENSP00000343782 | 9606.ENSP00000289753 | 0      | 0     | 0      | 0,774  | 0      | 0        | 0    | 0,9   | 0,146          | 0,902 |
| ADRB3   | LHCGR   | 9606.ENSP00000343782 | 9606.ENSP00000294954 | 0      | 0     | 0      | 0      | 0,044  | 0        | 0    | 0,9   | 0,153          | 0,911 |
| ADRB3   | MC5R    | 9606.ENSP00000343782 | 9606.ENSP00000318077 | 0      | 0     | 0      | 0,602  | 0      | 0        | 0    | 0,9   | 0,167          | 0,905 |
| ADRB3   | GHRHR   | 9606.ENSP00000343782 | 9606.ENSP00000320180 | 0      | 0     | 0      | 0      | 0      | 0        | 0    | 0,9   | 0,111          | 0,907 |
| ADRB3   | NPSR1   | 9606.ENSP00000343782 | 9606.ENSP00000370950 | 0      | 0     | 0      | 0,584  | 0      | 0        | 0    | 0,9   | 0,117          | 0,903 |
| ADRB3   | CALCRL  | 9606.ENSP00000343782 | 9606.ENSP00000386972 | 0      | 0     | 0      | 0      | 0      | 0        | 0    | 0,9   | 0,171          | 0,913 |
| AGTR2   | HTR2C   | 9606.ENSP00000360973 | 9606.ENSP00000276198 | 0      | 0     | 0      | 0,572  | 0      | 0        | 0    | 0,9   | 0,158          | 0,905 |
| AGTR2   | MCHR2   | 9606.ENSP00000360973 | 9606.ENSP00000281806 | 0      | 0     | 0      | 0,657  | 0      | 0        | 0    | 0,9   | 0,073          | 0,901 |
| AGTR2   | F2RL2   | 9606.ENSP00000360973 | 9606.ENSP00000296641 | 0      | 0     | 0      | 0,635  | 0      | 0        | 0    | 0,9   | 0,08           | 0,901 |
| AGTR2   | GALR1   | 9606.ENSP00000360973 | 9606.ENSP00000299727 | 0      | 0     | 0      | 0,685  | 0      | 0        | 0    | 0,9   | 0,094          | 0,901 |
| AGTR2   | C3AR1   | 9606.ENSP00000360973 | 9606.ENSP00000302079 | 0      | 0     | 0      | 0,595  | 0      | 0        | 0    | 0,9   | 0              | 0,9   |
| AGTR2   | EDNRA   | 9606.ENSP00000360973 | 9606.ENSP00000315011 | 0      | 0     | 0      | 0,577  | 0,061  | 0        | 0    | 0,9   | 0,378          | 0,916 |
| AGTR2   | HTR1A   | 9606.ENSP00000360973 | 9606.ENSP00000316244 | 0      | 0     | 0      | 0,572  | 0      | 0        | 0    | 0,9   | 0,09           | 0,902 |
| AGTR2   | HTR1F   | 9606.ENSP00000360973 | 9606.ENSP00000322924 | 0      | 0     | 0      | 0,589  | 0      | 0        | 0    | 0,9   | 0,162          | 0,905 |
| AGTR2   | TAS2R60 | 9606.ENSP00000360973 | 9606.ENSP00000327724 | 0      | 0     | 0      | 0      | 0      | 0        | 0    | 0,9   | 0              | 0,9   |
| AGTR2   | NPY2R   | 9606.ENSP00000360973 | 9606.ENSP00000332591 | 0      | 0     | 0      | 0,632  | 0,06   | 0        | 0    | 0,9   | 0,141          | 0,905 |
| AGTR2   | OPRL1   | 9606.ENSP00000360973 | 9606.ENSP00000336764 | 0      | 0     | 0      | 0,697  | 0      | 0        | 0    | 0,9   | 0,211          | 0,905 |
| AGTR2   | PTGER3  | 9606.ENSP00000360973 | 9606.ENSP00000349003 | 0      | 0     | 0      | 0      | 0      | 0        | 0    | 0,9   | 0,064          | 0,902 |
| AGTR2   | HTR1B   | 9606.ENSP00000360973 | 9606.ENSP00000358963 | 0      | 0     | 0      | 0,587  | 0      | 0        | 0    | 0,9   | 0,113          | 0,903 |
| AGTR2   | OXER1   | 9606.ENSP00000360973 | 9606.ENSP00000367930 | 0      | 0     | 0      | 0,625  | 0      | 0        | 0    | 0,9   | 0              | 0,9   |
| AGTR2   | TAS2R31 | 9606.ENSP00000360973 | 9606.ENSP00000375093 | 0      | 0     | 0      | 0      | 0      | 0        | 0    | 0,9   | 0              | 0,9   |
| AGTR2   | TAS2R41 | 9606.ENSP00000360973 | 9606.ENSP00000386201 | 0      | 0     | 0      | 0      | 0      | 0        | 0    | 0,9   | 0              | 0,9   |
| AGTR2   | TAS2R38 | 9606.ENSP00000360973 | 9606.ENSP00000448219 | 0      | 0     | 0      | 0      | 0      | 0        | 0    | 0,9   | 0              | 0,9   |
| AGTR2   | CXCR6   | 9606.ENSP00000360973 | 9606.ENSP00000395704 | 0      | 0     | 0      | 0,689  | 0      | 0        | 0    | 0,9   | 0              | 0,9   |
| AGTR2   | GRM2    | 9606.ENSP00000360973 | 9606.ENSP00000378492 | 0      | 0     | 0      | 0      | 0      | 0        | 0    | 0,9   | 0,052          | 0,901 |
| AGTR2   | GABBR1  | 9606.ENSP00000360973 | 9606.ENSP00000366233 | 0      | 0     | 0      | 0      | 0      | 0        | 0    | 0,9   | 0,073          | 0,903 |
| AGTR2   | NPSR1   | 9606.ENSP00000360973 | 9606.ENSP00000370950 | 0      | 0     | 0      | 0,6    | 0      | 0        | 0    | 0,9   | 0,137          | 0,904 |
| AGTR2   | CASR    | 9606.ENSP00000360973 | 9606.ENSP00000420194 | 0      | 0     | 0      | 0      | 0      | 0        | 0    | 0,9   | 0,151          | 0,911 |
| AGTR2   | CNR2    | 9606.ENSP00000360973 | 9606.ENSP00000363596 | 0      | 0     | 0      | 0      | 0      | 0        | 0    | 0,9   | 0,162          | 0,912 |
| C3AR1   | MCHR2   | 9606.ENSP00000302079 | 9606.ENSP00000281806 | 0      | 0     | 0      | 0,611  | 0      | 0        | 0    | 0,9   | 0,314          | 0,911 |
| C3AR1   | GALR1   | 9606.ENSP00000302079 | 9606.ENSP00000299727 | 0      | 0     | 0      | 0,591  | 0,061  | 0        | 0    | 0,9   | 0,227          | 0,909 |
| C3AR1   | HTR1A   | 9606.ENSP00000302079 | 9606.ENSP00000316244 | 0      | 0     | 0      | 0,561  | 0      | 0        | 0    | 0,9   | 0              | 0,9   |
| C3AR1   | TARM1   | 9606.ENSP00000302079 | 9606.ENSP00000439454 | 0      | 0     | 0      | 0      | 0      | 0        | 0    | 0,9   | 0              | 0,9   |
| C3AR1   | TAS2R31 | 9606.ENSP00000302079 | 9606.ENSP00000375093 | 0      | 0     | 0      | 0      | 0      | 0        | 0    | 0,9   | 0,049          | 0,9   |
| C3AR1   | GABBR1  | 9606.ENSP00000302079 | 9606.ENSP00000366233 | 0      | 0     | 0      | 0      | 0      | 0        | 0    | 0,9   | 0              | 0,9   |
| C3AR1   | CASR    | 9606.ENSP00000302079 | 9606.ENSP00000420194 | 0      | 0     | 0      | 0      | 0      | 0        | 0    | 0,9   | 0              | 0,9   |
| C3AR1   | HTR1B   | 9606.ENSP00000302079 | 9606.ENSP00000358963 | 0      | 0     | 0      | 0      | 0      | 0        | 0    | 0,9   | 0              | 0,9   |
| C3AR1   | TAS2R41 | 9606.ENSP00000302079 | 9606.ENSP00000386201 | 0      | 0     | 0      | 0      | 0      | 0        | 0    | 0,9   | 0              | 0,9   |
| C3AR1   | TAS2R38 | 9606.ENSP00000302079 | 9606.ENSP00000448219 | 0      | 0     | 0      | 0      | 0      | 0        | 0    | 0,9   | 0              | 0,9   |
| C3AR1   | NPY2R   | 9606.ENSP00000302079 | 9606.ENSP00000332591 | 0      | 0     | 0      | 0,582  | 0      | 0        | 0    | 0,9   | 0              | 0,9   |
| C3AR1   | TAS2R60 | 9606.ENSP00000302079 | 9606.ENSP00000327724 | 0      | 0     | 0      | 0      | 0      | 0        | 0    | 0,9   | 0              | 0,9   |
| C3AR1   | GRM2    | 9606.ENSP00000302079 | 9606.ENSP00000378492 | 0      | 0     | 0      | 0      | 0      | 0        | 0    | 0,9   | 0,05           | 0,9   |
| C3AR1   | CNR2    | 9606.ENSP00000302079 | 9606.ENSP00000363596 | 0      | 0     | 0      | 0      | 0,061  | 0        | 0    | 0,9   | 0              | 0,902 |
| C3AR1   | OPRL1   | 9606.ENSP00000302079 | 9606.ENSP00000336764 | 0      | 0     | 0      | 0,623  | 0,076  | 0        | 0    | 0,9   | 0,045          | 0,903 |
| C3AR1   | OXER1   | 9606.ENSP00000302079 | 9606.ENSP00000367930 | 0      | 0     | 0      | 0,582  | 0,096  | 0        | 0    | 0,9   | 0              | 0,905 |
| C3AR1   | PLAUR   | 9606.ENSP00000302079 | 9606.ENSP00000339328 | 0      | 0     | 0      | 0      | 0,088  | 0        | 0    | 0,9   | 0,047          | 0,905 |
| C3AR1   | HTR1F   | 9606.ENSP00000302079 | 9606.ENSP00000322924 | 0      | 0     | 0      | 0      | 0      | 0        | 0    | 0,9   | 0,118          | 0,908 |
| C3AR1   | PTGER3  | 9606.ENSP00000302079 | 9606.ENSP00000349003 | 0      | 0     | 0      | 0      | 0      | 0        | 0    | 0,9   | 0,126          | 0,908 |
| C3AR1   | CXCR6   | 9606.ENSP00000302079 | 9606.ENSP00000395704 | 0      | 0     | 0      | 0,596  | 0,082  | 0        | 0    | 0,9   | 0,177          | 0,909 |
| C3AR1   | LAIR1   | 9606.ENSP00000302079 | 9606.ENSP00000375622 | 0      | 0     | 0      | 0      | 0,16   | 0        | 0    | 0,9   | 0,062          | 0,914 |
| CACNA1C | CACNB2  | 9606.ENSP00000266376 | 9606.ENSP00000320025 | 0      | 0     | 0      | 0      | 0,086  | 0        | 0    | 0,9   | 0,807          | 0,98  |
| CALCRL  | RAMP2   | 9606.ENSP00000386972 | 9606.ENSP00000253796 | 0      | 0     | 0      | 0      | 0,063  | 0        | 0    | 0,9   | 0,955          | 0,995 |
| CALCRL  | GPR15   | 9606.ENSP00000386972 | 9606.ENSP00000284311 | 0      | 0     | 0      | 0      | 0      | 0        | 0    | 0,9   | 0,041          | 0,9   |
| CALCRL  | HTR6    | 9606.ENSP00000386972 | 9606.ENSP00000289753 | 0      | 0     | 0      | 0      | 0      | 0        | 0    | 0,9   | 0              | 0,9   |
| CALCRL  | LHCGR   | 9606.ENSP00000386972 | 9606.ENSP00000294954 | 0      | 0     | 0      | 0      | 0,064  | 0        | 0    | 0,9   | 0,174          | 0,916 |
| CALCRL  | MC5R    | 9606.ENSP00000386972 | 9606.ENSP00000318077 | 0      | 0     | 0      | 0      | 0      | 0        | 0    | 0,9   | 0,166          | 0,913 |
| CALCRL  | GHRHR   | 9606.ENSP00000386972 | 9606.ENSP00000320180 | 0      | 0     | 0      | 0,695  | 0      | 0        | 0    | 0,9   | 0,368          | 0,91  |
| CALCRL  | NPSR1   | 9606.ENSP00000386972 | 9606.ENSP00000370950 | 0      | 0     | 0      | 0      | 0      | 0        | 0    | 0,9   | 0,333          | 0,93  |
| CASR    | CHRM3   | 9606.ENSP00000420194 | 9606.ENSP00000255380 | 0      | 0     | 0      | 0      | 0      | 0        | 0    | 0,9   | 0,125          | 0,908 |
| CASR    | HTR2C   | 9606.ENSP00000420194 | 9606.ENSP00000276198 | 0      | 0     | 0      | 0      | 0,059  | 0        | 0    | 0,9   | 0,099          | 0,907 |
| CASR    | MCHR2   | 9606.ENSP00000420194 | 9606.ENSP00000281806 | 0      | 0     | 0      | 0      | 0,055  | 0        | 0    | 0,9   | 0,049          | 0,902 |
| CASR    | F2RL2   | 9606.ENSP00000420194 | 9606.ENSP00000296641 | 0      | 0     | 0      | 0      | 0      | 0        | 0    | 0,9   | 0              | 0,9   |
| CASR    | GALR1   | 9606.ENSP00000420194 | 9606.ENSP00000299727 | 0      | 0     | 0      | 0      | 0,061  | 0        | 0    | 0,9   | 0,094          | 0,907 |
| CASR    | GPRC6A  | 9606.ENSP00000420194 | 9606.ENSP00000309493 | 0      | 0     | 0      | 0,83   | 0      | 0        | 0    | 0,9   | 0,861          | 0,914 |
| CASR    | EDNRA   | 9606.ENSP00000420194 | 9606.ENSP00000315011 | 0      | 0     | 0      | 0      | 0      | 0        | 0    | 0,9   | 0,127          | 0,908 |
| CASR    | HTR1A   | 9606.ENSP00000420194 | 9606.ENSP00000316244 | 0      | 0     | 0      | 0      | 0      | 0        | 0    | 0,9   | 0,123          | 0,908 |
| CASR    | HTR1F   | 9606.ENSP00000420194 | 9606.ENSP00000322924 | 0      | 0     | 0      | 0      | 0      | 0        | 0    | 0,9   | 0,043          | 0,9   |
| CASR    | TAS2R60 | 9606.ENSP00000420194 | 9606.ENSP00000327724 | 0      | 0     | 0      | 0      | 0      | 0        | 0    | 0,9   | 0,324          | 0,929 |
| CASR    | NPY2R   | 9606.ENSP00000420194 | 9606.ENSP00000332591 | 0      | 0     | 0      | 0      | 0,049  | 0        | 0    | 0,9   | 0,162          | 0,913 |
| CASR    | OPRL1   | 9606.ENSP00000420194 | 9606.ENSP00000336764 | 0      | 0     | 0      | 0      | 0,055  | 0        | 0    | 0,9   | 0,121          | 0,909 |
| CASR    | PTGER3  | 9606.ENSP00000420194 | 9606.ENSP00000349003 | 0      | 0     | 0      | 0      | 0      | 0        | 0    | 0,9   | 0,063          | 0,902 |
| CASR    | HTR1B   | 9606.ENSP00000420194 | 9606.ENSP00000358963 | 0      | 0     | 0      | 0      | 0      | 0        | 0    | 0,9   | 0,093          | 0,905 |
| CASR    | CNR2    | 9606.ENSP00000420194 | 9606.ENSP00000363596 | 0      | 0     | 0      | 0      | 0      | 0        | 0    | 0,9   | 0,175          | 0,913 |

|        |         |                      |                      |   |   |   |       |       |   |     |       |       |
|--------|---------|----------------------|----------------------|---|---|---|-------|-------|---|-----|-------|-------|
| CASR   | GABBR1  | 9606.ENSPO0000420194 | 9606.ENSPO0000366233 | 0 | 0 | 0 | 0     | 0,049 | 0 | 0,9 | 0,473 | 0,945 |
| CASR   | OXER1   | 9606.ENSPO0000420194 | 9606.ENSPO0000367930 | 0 | 0 | 0 | 0     | 0     | 0 | 0,9 | 0,067 | 0,902 |
| CASR   | NPSR1   | 9606.ENSPO0000420194 | 9606.ENSPO0000370950 | 0 | 0 | 0 | 0     | 0     | 0 | 0,9 | 0,68  | 0,966 |
| CASR   | TAS2R31 | 9606.ENSPO0000420194 | 9606.ENSPO0000375093 | 0 | 0 | 0 | 0     | 0     | 0 | 0,9 | 0,337 | 0,93  |
| CASR   | GRM2    | 9606.ENSPO0000420194 | 9606.ENSPO0000378492 | 0 | 0 | 0 | 0,801 | 0     | 0 | 0,9 | 0,297 | 0,905 |
| CASR   | TAS2R41 | 9606.ENSPO0000420194 | 9606.ENSPO0000386201 | 0 | 0 | 0 | 0     | 0     | 0 | 0,9 | 0,309 | 0,928 |
| CASR   | CXCR6   | 9606.ENSPO0000420194 | 9606.ENSPO0000395704 | 0 | 0 | 0 | 0     | 0     | 0 | 0,9 | 0     | 0,9   |
| CASR   | TAS2R38 | 9606.ENSPO0000420194 | 9606.ENSPO0000448219 | 0 | 0 | 0 | 0     | 0     | 0 | 0,9 | 0,501 | 0,948 |
| CD2    | FCGR3A  | 9606.ENSPO0000358490 | 9606.ENSPO0000356946 | 0 | 0 | 0 | 0     | 0,337 | 0 | 0,9 | 0,352 | 0,953 |
| CD22   | PTPRC   | 9606.ENSPO0000085219 | 9606.ENSPO0000411355 | 0 | 0 | 0 | 0     | 0,182 | 0 | 0,8 | 0,816 | 0,967 |
| CD34   | PTPRC   | 9606.ENSPO0000310036 | 9606.ENSPO0000411355 | 0 | 0 | 0 | 0     | 0     | 0 | 0   | 0,925 | 0,925 |
| CD3D   | PTPRC   | 9606.ENSPO0000300692 | 9606.ENSPO0000411355 | 0 | 0 | 0 | 0     | 0,302 | 0 | 0,9 | 0,33  | 0,949 |
| CD3D   | CD8A    | 9606.ENSPO0000300692 | 9606.ENSPO0000386559 | 0 | 0 | 0 | 0     | 0,383 | 0 | 0,9 | 0,389 | 0,959 |
| CHRM3  | NPSR1   | 9606.ENSPO0000255380 | 9606.ENSPO0000370950 | 0 | 0 | 0 | 0,575 | 0     | 0 | 0,9 | 0     | 0,9   |
| CHRM3  | F2RL2   | 9606.ENSPO0000255380 | 9606.ENSPO0000296641 | 0 | 0 | 0 | 0     | 0     | 0 | 0,9 | 0,056 | 0,901 |
| CHRM3  | GPRC6A  | 9606.ENSPO0000255380 | 9606.ENSPO0000309493 | 0 | 0 | 0 | 0     | 0     | 0 | 0,9 | 0,062 | 0,902 |
| CHRM3  | MCHR2   | 9606.ENSPO0000255380 | 9606.ENSPO0000281806 | 0 | 0 | 0 | 0,577 | 0,063 | 0 | 0,9 | 0,063 | 0,903 |
| CHRM3  | EDNRA   | 9606.ENSPO0000255380 | 9606.ENSPO0000315011 | 0 | 0 | 0 | 0     | 0     | 0 | 0,9 | 0,111 | 0,907 |
| CHRM3  | HTR2C   | 9606.ENSPO0000255380 | 9606.ENSPO0000276198 | 0 | 0 | 0 | 0,625 | 0,098 | 0 | 0,9 | 0,318 | 0,916 |
| CHRN2  | CHRN3   | 9606.ENSPO0000357461 | 9606.ENSPO0000289957 | 0 | 0 | 0 | 0,914 | 0,085 | 0 | 0,9 | 0,801 | 0,911 |
| CNR2   | MCHR2   | 9606.ENSPO0000363596 | 9606.ENSPO0000281806 | 0 | 0 | 0 | 0     | 0     | 0 | 0,9 | 0,065 | 0,902 |
| CNR2   | GALR1   | 9606.ENSPO0000363596 | 9606.ENSPO0000299727 | 0 | 0 | 0 | 0     | 0,089 | 0 | 0,9 | 0,188 | 0,919 |
| CNR2   | HTR1A   | 9606.ENSPO0000363596 | 9606.ENSPO0000316244 | 0 | 0 | 0 | 0     | 0     | 0 | 0,9 | 0,429 | 0,94  |
| CNR2   | HTR1F   | 9606.ENSPO0000363596 | 9606.ENSPO0000322924 | 0 | 0 | 0 | 0     | 0,062 | 0 | 0,9 | 0,108 | 0,909 |
| CNR2   | TAS2R60 | 9606.ENSPO0000363596 | 9606.ENSPO0000327724 | 0 | 0 | 0 | 0     | 0     | 0 | 0,9 | 0,046 | 0,9   |
| CNR2   | NPY2R   | 9606.ENSPO0000363596 | 9606.ENSPO0000332591 | 0 | 0 | 0 | 0     | 0     | 0 | 0,9 | 0,116 | 0,907 |
| CNR2   | OPRL1   | 9606.ENSPO0000363596 | 9606.ENSPO0000336764 | 0 | 0 | 0 | 0     | 0     | 0 | 0,9 | 0,652 | 0,963 |
| CNR2   | PTGER3  | 9606.ENSPO0000363596 | 9606.ENSPO0000349003 | 0 | 0 | 0 | 0     | 0     | 0 | 0,9 | 0,14  | 0,91  |
| CNR2   | HTR1B   | 9606.ENSPO0000363596 | 9606.ENSPO0000358963 | 0 | 0 | 0 | 0,582 | 0     | 0 | 0,9 | 0,167 | 0,905 |
| CNR2   | TAS2R31 | 9606.ENSPO0000363596 | 9606.ENSPO0000375093 | 0 | 0 | 0 | 0     | 0     | 0 | 0,9 | 0     | 0,9   |
| CNR2   | TAS2R41 | 9606.ENSPO0000363596 | 9606.ENSPO0000386201 | 0 | 0 | 0 | 0     | 0     | 0 | 0,9 | 0,047 | 0,9   |
| CNR2   | TAS2R38 | 9606.ENSPO0000363596 | 9606.ENSPO0000448219 | 0 | 0 | 0 | 0     | 0     | 0 | 0,9 | 0     | 0,9   |
| CNR2   | OXER1   | 9606.ENSPO0000363596 | 9606.ENSPO0000367930 | 0 | 0 | 0 | 0     | 0     | 0 | 0,9 | 0,056 | 0,901 |
| CNR2   | CXCR6   | 9606.ENSPO0000363596 | 9606.ENSPO0000395704 | 0 | 0 | 0 | 0     | 0,061 | 0 | 0,9 | 0,091 | 0,907 |
| CNR2   | GRM2    | 9606.ENSPO0000363596 | 9606.ENSPO0000378492 | 0 | 0 | 0 | 0     | 0     | 0 | 0,9 | 0,229 | 0,919 |
| CNR2   | GABBR1  | 9606.ENSPO0000363596 | 9606.ENSPO0000366233 | 0 | 0 | 0 | 0     | 0     | 0 | 0,9 | 0,358 | 0,933 |
| CXCR6  | MCHR2   | 9606.ENSPO0000395704 | 9606.ENSPO0000281806 | 0 | 0 | 0 | 0,648 | 0     | 0 | 0,9 | 0     | 0,9   |
| CXCR6  | GALR1   | 9606.ENSPO0000395704 | 9606.ENSPO0000299727 | 0 | 0 | 0 | 0,647 | 0     | 0 | 0,9 | 0     | 0,9   |
| CXCR6  | HTR1A   | 9606.ENSPO0000395704 | 9606.ENSPO0000316244 | 0 | 0 | 0 | 0,582 | 0     | 0 | 0,9 | 0     | 0,9   |
| CXCR6  | HTR1F   | 9606.ENSPO0000395704 | 9606.ENSPO0000322924 | 0 | 0 | 0 | 0,578 | 0     | 0 | 0,9 | 0     | 0,9   |
| CXCR6  | TAS2R60 | 9606.ENSPO0000395704 | 9606.ENSPO0000327724 | 0 | 0 | 0 | 0     | 0     | 0 | 0,9 | 0     | 0,9   |
| CXCR6  | NPY2R   | 9606.ENSPO0000395704 | 9606.ENSPO0000332591 | 0 | 0 | 0 | 0,606 | 0,062 | 0 | 0,9 | 0     | 0,902 |
| CXCR6  | OPRL1   | 9606.ENSPO0000395704 | 9606.ENSPO0000336764 | 0 | 0 | 0 | 0,702 | 0     | 0 | 0,9 | 0     | 0,9   |
| CXCR6  | PTGER3  | 9606.ENSPO0000395704 | 9606.ENSPO0000349003 | 0 | 0 | 0 | 0     | 0     | 0 | 0,9 | 0,07  | 0,903 |
| CXCR6  | HTR1B   | 9606.ENSPO0000395704 | 9606.ENSPO0000358963 | 0 | 0 | 0 | 0     | 0     | 0 | 0,9 | 0     | 0,9   |
| CXCR6  | GABBR1  | 9606.ENSPO0000395704 | 9606.ENSPO0000366233 | 0 | 0 | 0 | 0     | 0     | 0 | 0,9 | 0     | 0,9   |
| CXCR6  | OXER1   | 9606.ENSPO0000395704 | 9606.ENSPO0000367930 | 0 | 0 | 0 | 0,612 | 0     | 0 | 0,9 | 0     | 0,9   |
| CXCR6  | TAS2R31 | 9606.ENSPO0000395704 | 9606.ENSPO0000375093 | 0 | 0 | 0 | 0     | 0     | 0 | 0,9 | 0     | 0,9   |
| CXCR6  | GRM2    | 9606.ENSPO0000395704 | 9606.ENSPO0000378492 | 0 | 0 | 0 | 0     | 0     | 0 | 0,9 | 0     | 0,9   |
| CXCR6  | TAS2R41 | 9606.ENSPO0000395704 | 9606.ENSPO0000386201 | 0 | 0 | 0 | 0     | 0     | 0 | 0,9 | 0     | 0,9   |
| CXCR6  | TAS2R38 | 9606.ENSPO0000395704 | 9606.ENSPO0000448219 | 0 | 0 | 0 | 0     | 0     | 0 | 0,9 | 0     | 0,9   |
| EDNRA  | HTR2C   | 9606.ENSPO0000315011 | 9606.ENSPO0000276198 | 0 | 0 | 0 | 0     | 0     | 0 | 0,9 | 0,108 | 0,906 |
| EDNRA  | MCHR2   | 9606.ENSPO0000315011 | 9606.ENSPO0000281806 | 0 | 0 | 0 | 0,58  | 0     | 0 | 0,9 | 0,082 | 0,901 |
| EDNRA  | F2RL2   | 9606.ENSPO0000315011 | 9606.ENSPO0000296641 | 0 | 0 | 0 | 0     | 0,061 | 0 | 0,9 | 0,086 | 0,906 |
| EDNRA  | GPRC6A  | 9606.ENSPO0000315011 | 9606.ENSPO0000309493 | 0 | 0 | 0 | 0     | 0     | 0 | 0,9 | 0,082 | 0,904 |
| EDNRA  | NPSR1   | 9606.ENSPO0000315011 | 9606.ENSPO0000370950 | 0 | 0 | 0 | 0     | 0     | 0 | 0,9 | 0,125 | 0,908 |
| EPHA10 | EPHA6   | 9606.ENSPO0000362139 | 9606.ENSPO0000374323 | 0 | 0 | 0 | 0,929 | 0,08  | 0 | 0,9 | 0,313 | 0,905 |
| ERBB4  | PRLR    | 9606.ENSPO0000342235 | 9606.ENSPO0000482954 | 0 | 0 | 0 | 0     | 0     | 0 | 0,9 | 0,304 | 0,927 |
| ERBB4  | GRIN2B  | 9606.ENSPO0000342235 | 9606.ENSPO0000477455 | 0 | 0 | 0 | 0     | 0,121 | 0 | 0,9 | 0,398 | 0,942 |
| F2RL2  | HTR2C   | 9606.ENSPO0000296641 | 9606.ENSPO0000276198 | 0 | 0 | 0 | 0     | 0     | 0 | 0,9 | 0,35  | 0,932 |
| F2RL2  | MCHR2   | 9606.ENSPO0000296641 | 9606.ENSPO0000281806 | 0 | 0 | 0 | 0,648 | 0     | 0 | 0,9 | 0,06  | 0,9   |
| F2RL2  | GPRC6A  | 9606.ENSPO0000296641 | 9606.ENSPO0000309493 | 0 | 0 | 0 | 0     | 0     | 0 | 0,9 | 0     | 0,9   |
| F2RL2  | NPSR1   | 9606.ENSPO0000296641 | 9606.ENSPO0000370950 | 0 | 0 | 0 | 0,601 | 0     | 0 | 0,9 | 0     | 0,9   |
| FCGR1B | MRC1    | 9606.ENSPO0000358391 | 9606.ENSPO0000455897 | 0 | 0 | 0 | 0     | 0,124 | 0 | 0,9 | 0,115 | 0,915 |
| GABBR1 | MCHR2   | 9606.ENSPO0000366233 | 9606.ENSPO0000281806 | 0 | 0 | 0 | 0     | 0,063 | 0 | 0,9 | 0,103 | 0,908 |
| GABBR1 | GALR1   | 9606.ENSPO0000366233 | 9606.ENSPO0000299727 | 0 | 0 | 0 | 0     | 0,061 | 0 | 0,9 | 0,118 | 0,91  |
| GABBR1 | HTR1A   | 9606.ENSPO0000366233 | 9606.ENSPO0000316244 | 0 | 0 | 0 | 0     | 0,108 | 0 | 0,9 | 0,638 | 0,964 |
| GABBR1 | HTR1F   | 9606.ENSPO0000366233 | 9606.ENSPO0000322924 | 0 | 0 | 0 | 0     | 0,062 | 0 | 0,9 | 0,185 | 0,916 |
| GABBR1 | TAS2R60 | 9606.ENSPO0000366233 | 9606.ENSPO0000327724 | 0 | 0 | 0 | 0     | 0     | 0 | 0,9 | 0     | 0,9   |
| GABBR1 | NPY2R   | 9606.ENSPO0000366233 | 9606.ENSPO0000332591 | 0 | 0 | 0 | 0     | 0,088 | 0 | 0,9 | 0,267 | 0,927 |
| GABBR1 | OPRL1   | 9606.ENSPO0000366233 | 9606.ENSPO0000336764 | 0 | 0 | 0 | 0     | 0,098 | 0 | 0,9 | 0,583 | 0,959 |
| GABBR1 | PTGER3  | 9606.ENSPO0000366233 | 9606.ENSPO0000349003 | 0 | 0 | 0 | 0     | 0     | 0 | 0,9 | 0,131 | 0,909 |
| GABBR1 | HTR1B   | 9606.ENSPO0000366233 | 9606.ENSPO0000358963 | 0 | 0 | 0 | 0     | 0,082 | 0 | 0,9 | 0,297 | 0,929 |
| GABBR1 | TAS2R31 | 9606.ENSPO0000366233 | 9606.ENSPO0000375093 | 0 | 0 | 0 | 0     | 0     | 0 | 0,9 | 0     | 0,9   |
| GABBR1 | TAS2R41 | 9606.ENSPO0000366233 | 9606.ENSPO0000386201 | 0 | 0 | 0 | 0     | 0     | 0 | 0,9 | 0     | 0,9   |
| GABBR1 | TAS2R38 | 9606.ENSPO0000366233 | 9606.ENSPO0000448219 | 0 | 0 | 0 | 0     | 0     | 0 | 0,9 | 0,041 | 0,9   |
| GABBR1 | OXER1   | 9606.ENSPO0000366233 | 9606.ENSPO0000367930 | 0 | 0 | 0 | 0     | 0     | 0 | 0,9 | 0,056 | 0,901 |
| GABBR1 | KCNJ16  | 9606.ENSPO0000366233 | 9606.ENSPO0000465295 | 0 | 0 | 0 | 0     | 0,051 | 0 | 0,9 | 0     | 0,901 |
| GABBR1 | GRM2    | 9606.ENSPO0000366233 | 9606.ENSPO0000378492 | 0 | 0 | 0 | 0,545 | 0,108 | 0 | 0,9 | 0,574 | 0,93  |

|        |         |                      |                      |   |   |   |       |       |   |     |       |       |
|--------|---------|----------------------|----------------------|---|---|---|-------|-------|---|-----|-------|-------|
| GABRA2 | GABRA6  | 9606.ENSPO0000421828 | 9606.ENSPO0000274545 | 0 | 0 | 0 | 0,954 | 0,158 | 0 | 0,9 | 0,702 | 0,915 |
| GABRA2 | GABRB2  | 9606.ENSPO0000421828 | 9606.ENSPO0000274547 | 0 | 0 | 0 | 0,847 | 0,176 | 0 | 0,9 | 0,72  | 0,923 |
| GABRA6 | GABRB2  | 9606.ENSPO0000274545 | 9606.ENSPO0000274547 | 0 | 0 | 0 | 0,832 | 0,458 | 0 | 0,9 | 0,783 | 0,95  |
| GALR1  | MCHR2   | 9606.ENSPO0000299727 | 9606.ENSPO0000281806 | 0 | 0 | 0 | 0,672 | 0     | 0 | 0,9 | 0,508 | 0,916 |
| GALR1  | TAS2R31 | 9606.ENSPO0000299727 | 9606.ENSPO0000375093 | 0 | 0 | 0 | 0     | 0     | 0 | 0,9 | 0     | 0,9   |
| GALR1  | PTGER3  | 9606.ENSPO0000299727 | 9606.ENSPO0000349003 | 0 | 0 | 0 | 0     | 0     | 0 | 0,9 | 0,041 | 0,9   |
| GALR1  | TAS2R41 | 9606.ENSPO0000299727 | 9606.ENSPO0000386201 | 0 | 0 | 0 | 0     | 0     | 0 | 0,9 | 0     | 0,9   |
| GALR1  | TAS2R38 | 9606.ENSPO0000299727 | 9606.ENSPO0000448219 | 0 | 0 | 0 | 0     | 0     | 0 | 0,9 | 0     | 0,9   |
| GALR1  | TAS2R60 | 9606.ENSPO0000299727 | 9606.ENSPO0000327724 | 0 | 0 | 0 | 0     | 0     | 0 | 0,9 | 0     | 0,9   |
| GALR1  | OXER1   | 9606.ENSPO0000299727 | 9606.ENSPO0000367930 | 0 | 0 | 0 | 0,59  | 0     | 0 | 0,9 | 0,167 | 0,905 |
| GALR1  | HTR1F   | 9606.ENSPO0000299727 | 9606.ENSPO0000322924 | 0 | 0 | 0 | 0,586 | 0,062 | 0 | 0,9 | 0,145 | 0,906 |
| GALR1  | HTR1B   | 9606.ENSPO0000299727 | 9606.ENSPO0000358963 | 0 | 0 | 0 | 0,596 | 0,061 | 0 | 0,9 | 0,143 | 0,906 |
| GALR1  | OPRL1   | 9606.ENSPO0000299727 | 9606.ENSPO0000336764 | 0 | 0 | 0 | 0,777 | 0,063 | 0 | 0,9 | 0,399 | 0,91  |
| GALR1  | NPY2R   | 9606.ENSPO0000299727 | 9606.ENSPO0000332591 | 0 | 0 | 0 | 0,751 | 0,063 | 0 | 0,9 | 0,442 | 0,912 |
| GALR1  | GRM2    | 9606.ENSPO0000299727 | 9606.ENSPO0000378492 | 0 | 0 | 0 | 0     | 0,061 | 0 | 0,9 | 0,165 | 0,914 |
| GALR1  | HTR1A   | 9606.ENSPO0000299727 | 9606.ENSPO0000316244 | 0 | 0 | 0 | 0,587 | 0,062 | 0 | 0,9 | 0,473 | 0,92  |
| GHRHR  | RAMP2   | 9606.ENSPO0000320180 | 9606.ENSPO0000253796 | 0 | 0 | 0 | 0     | 0     | 0 | 0,9 | 0,108 | 0,907 |
| GHRHR  | GPR15   | 9606.ENSPO0000320180 | 9606.ENSPO0000284311 | 0 | 0 | 0 | 0     | 0     | 0 | 0,9 | 0,05  | 0,9   |
| GHRHR  | HTR6    | 9606.ENSPO0000320180 | 9606.ENSPO0000289753 | 0 | 0 | 0 | 0     | 0     | 0 | 0,9 | 0     | 0,9   |
| GHRHR  | LHCGR   | 9606.ENSPO0000320180 | 9606.ENSPO0000294954 | 0 | 0 | 0 | 0     | 0,061 | 0 | 0,9 | 0,166 | 0,914 |
| GHRHR  | MC5R    | 9606.ENSPO0000320180 | 9606.ENSPO0000318077 | 0 | 0 | 0 | 0     | 0     | 0 | 0,9 | 0,058 | 0,901 |
| GHRHR  | NPSR1   | 9606.ENSPO0000320180 | 9606.ENSPO0000370950 | 0 | 0 | 0 | 0     | 0     | 0 | 0,9 | 0,137 | 0,91  |
| GPR15  | RAMP2   | 9606.ENSPO0000284311 | 9606.ENSPO0000253796 | 0 | 0 | 0 | 0     | 0     | 0 | 0,9 | 0     | 0,9   |
| GPR15  | HTR6    | 9606.ENSPO0000284311 | 9606.ENSPO0000289753 | 0 | 0 | 0 | 0     | 0     | 0 | 0,9 | 0     | 0,9   |
| GPR15  | NPSR1   | 9606.ENSPO0000284311 | 9606.ENSPO0000370950 | 0 | 0 | 0 | 0,594 | 0     | 0 | 0,9 | 0,041 | 0,9   |
| GPR15  | MC5R    | 9606.ENSPO0000284311 | 9606.ENSPO0000318077 | 0 | 0 | 0 | 0     | 0     | 0 | 0,9 | 0     | 0,9   |
| GPR15  | LHCGR   | 9606.ENSPO0000284311 | 9606.ENSPO0000294954 | 0 | 0 | 0 | 0     | 0     | 0 | 0,9 | 0,067 | 0,902 |
| GPRC6A | HTR2C   | 9606.ENSPO0000309493 | 9606.ENSPO0000276198 | 0 | 0 | 0 | 0     | 0     | 0 | 0,9 | 0,098 | 0,905 |
| GPRC6A | MCHR2   | 9606.ENSPO0000309493 | 9606.ENSPO0000281806 | 0 | 0 | 0 | 0     | 0     | 0 | 0,9 | 0,074 | 0,903 |
| GPRC6A | GRM2    | 9606.ENSPO0000309493 | 9606.ENSPO0000378492 | 0 | 0 | 0 | 0,706 | 0,062 | 0 | 0,9 | 0,195 | 0,906 |
| GPRC6A | NPSR1   | 9606.ENSPO0000309493 | 9606.ENSPO0000370950 | 0 | 0 | 0 | 0     | 0     | 0 | 0,9 | 0,307 | 0,927 |
| GRIA3  | GRIN1   | 9606.ENSPO0000481554 | 9606.ENSPO0000360608 | 0 | 0 | 0 | 0,639 | 0,159 | 0 | 0,9 | 0,77  | 0,936 |
| GRIA3  | GRIN2A  | 9606.ENSPO0000481554 | 9606.ENSPO0000379818 | 0 | 0 | 0 | 0,603 | 0,164 | 0 | 0,9 | 0,712 | 0,937 |
| GRIA3  | GRIN2B  | 9606.ENSPO0000481554 | 9606.ENSPO0000477455 | 0 | 0 | 0 | 0,605 | 0,151 | 0 | 0,9 | 0,712 | 0,935 |
| GRIA3  | GRIP2   | 9606.ENSPO0000481554 | 9606.ENSPO0000480660 | 0 | 0 | 0 | 0     | 0,064 | 0 | 0,9 | 0,346 | 0,933 |
| GRIN1  | GRIN3A  | 9606.ENSPO0000360608 | 9606.ENSPO0000355155 | 0 | 0 | 0 | 0,662 | 0,098 | 0 | 0,9 | 0,815 | 0,931 |
| GRIN1  | GRIN2A  | 9606.ENSPO0000360608 | 9606.ENSPO0000379818 | 0 | 0 | 0 | 0,687 | 0,266 | 0 | 0,9 | 0,96  | 0,946 |
| GRIN1  | GRIN2B  | 9606.ENSPO0000360608 | 9606.ENSPO0000477455 | 0 | 0 | 0 | 0,697 | 0,267 | 0 | 0,9 | 0,935 | 0,945 |
| GRIN2A | GRIN3A  | 9606.ENSPO0000379818 | 9606.ENSPO0000355155 | 0 | 0 | 0 | 0,658 | 0,063 | 0 | 0,9 | 0,861 | 0,93  |
| GRIN2A | GRIN2B  | 9606.ENSPO0000379818 | 9606.ENSPO0000477455 | 0 | 0 | 0 | 0,945 | 0,175 | 0 | 0,9 | 0,961 | 0,918 |
| GRIN2B | GRIN3A  | 9606.ENSPO0000477455 | 9606.ENSPO0000355155 | 0 | 0 | 0 | 0,661 | 0,063 | 0 | 0,9 | 0,876 | 0,931 |
| GRM2   | MCHR2   | 9606.ENSPO0000378492 | 9606.ENSPO0000281806 | 0 | 0 | 0 | 0     | 0,085 | 0 | 0,9 | 0,079 | 0,908 |
| GRM2   | HTR1A   | 9606.ENSPO0000378492 | 9606.ENSPO0000316244 | 0 | 0 | 0 | 0     | 0,117 | 0 | 0,9 | 0,577 | 0,959 |
| GRM2   | HTR1F   | 9606.ENSPO0000378492 | 9606.ENSPO0000322924 | 0 | 0 | 0 | 0     | 0,061 | 0 | 0,9 | 0,164 | 0,914 |
| GRM2   | TAS2R60 | 9606.ENSPO0000378492 | 9606.ENSPO0000327724 | 0 | 0 | 0 | 0     | 0     | 0 | 0,9 | 0,061 | 0,902 |
| GRM2   | NPY2R   | 9606.ENSPO0000378492 | 9606.ENSPO0000332591 | 0 | 0 | 0 | 0     | 0,072 | 0 | 0,9 | 0,214 | 0,92  |
| GRM2   | OPRL1   | 9606.ENSPO0000378492 | 9606.ENSPO0000336764 | 0 | 0 | 0 | 0     | 0,086 | 0 | 0,9 | 0,44  | 0,944 |
| GRM2   | PTGER3  | 9606.ENSPO0000378492 | 9606.ENSPO0000349003 | 0 | 0 | 0 | 0     | 0     | 0 | 0,9 | 0,093 | 0,905 |
| GRM2   | HTR1B   | 9606.ENSPO0000378492 | 9606.ENSPO0000358963 | 0 | 0 | 0 | 0     | 0,062 | 0 | 0,9 | 0,313 | 0,929 |
| GRM2   | OXER1   | 9606.ENSPO0000378492 | 9606.ENSPO0000367930 | 0 | 0 | 0 | 0     | 0     | 0 | 0,9 | 0,059 | 0,901 |
| GRM2   | TAS2R31 | 9606.ENSPO0000378492 | 9606.ENSPO0000375093 | 0 | 0 | 0 | 0     | 0     | 0 | 0,9 | 0,042 | 0,9   |
| GRM2   | TAS2R41 | 9606.ENSPO0000378492 | 9606.ENSPO0000386201 | 0 | 0 | 0 | 0     | 0     | 0 | 0,9 | 0,058 | 0,901 |
| GRM2   | TAS2R38 | 9606.ENSPO0000378492 | 9606.ENSPO0000448219 | 0 | 0 | 0 | 0     | 0     | 0 | 0,9 | 0,095 | 0,905 |
| HTR1A  | MCHR2   | 9606.ENSPO0000316244 | 9606.ENSPO0000281806 | 0 | 0 | 0 | 0,572 | 0,111 | 0 | 0,9 | 0,164 | 0,912 |
| HTR1A  | OXER1   | 9606.ENSPO0000316244 | 9606.ENSPO0000367930 | 0 | 0 | 0 | 0     | 0     | 0 | 0,9 | 0     | 0,9   |
| HTR1A  | TAS2R31 | 9606.ENSPO0000316244 | 9606.ENSPO0000375093 | 0 | 0 | 0 | 0     | 0     | 0 | 0,9 | 0     | 0,9   |
| HTR1A  | TAS2R38 | 9606.ENSPO0000316244 | 9606.ENSPO0000448219 | 0 | 0 | 0 | 0     | 0     | 0 | 0,9 | 0     | 0,9   |
| HTR1A  | TAS2R60 | 9606.ENSPO0000316244 | 9606.ENSPO0000327724 | 0 | 0 | 0 | 0     | 0     | 0 | 0,9 | 0     | 0,9   |
| HTR1A  | TAS2R41 | 9606.ENSPO0000316244 | 9606.ENSPO0000386201 | 0 | 0 | 0 | 0     | 0     | 0 | 0,9 | 0,086 | 0,904 |
| HTR1A  | PTGER3  | 9606.ENSPO0000316244 | 9606.ENSPO0000349003 | 0 | 0 | 0 | 0     | 0     | 0 | 0,9 | 0,118 | 0,908 |
| HTR1A  | HTR1F   | 9606.ENSPO0000316244 | 9606.ENSPO0000322924 | 0 | 0 | 0 | 0,896 | 0,062 | 0 | 0,9 | 0,748 | 0,909 |
| HTR1A  | NPY2R   | 9606.ENSPO0000316244 | 9606.ENSPO0000332591 | 0 | 0 | 0 | 0,597 | 0,171 | 0 | 0,9 | 0,348 | 0,924 |
| HTR1A  | OPRL1   | 9606.ENSPO0000316244 | 9606.ENSPO0000336764 | 0 | 0 | 0 | 0,589 | 0,087 | 0 | 0,9 | 0,588 | 0,927 |
| HTR1A  | HTR1B   | 9606.ENSPO0000316244 | 9606.ENSPO0000358963 | 0 | 0 | 0 | 0,904 | 0,097 | 0 | 0,9 | 0,938 | 0,914 |
| HTR1B  | MCHR2   | 9606.ENSPO0000358963 | 9606.ENSPO0000281806 | 0 | 0 | 0 | 0,594 | 0,062 | 0 | 0,9 | 0     | 0,902 |
| HTR1B  | HTR1F   | 9606.ENSPO0000358963 | 9606.ENSPO0000322924 | 0 | 0 | 0 | 0,932 | 0,061 | 0 | 0,9 | 0,842 | 0,907 |
| HTR1B  | TAS2R60 | 9606.ENSPO0000358963 | 9606.ENSPO0000327724 | 0 | 0 | 0 | 0     | 0     | 0 | 0,9 | 0     | 0,9   |
| HTR1B  | NPY2R   | 9606.ENSPO0000358963 | 9606.ENSPO0000332591 | 0 | 0 | 0 | 0,616 | 0,095 | 0 | 0,9 | 0,144 | 0,909 |
| HTR1B  | OPRL1   | 9606.ENSPO0000358963 | 9606.ENSPO0000336764 | 0 | 0 | 0 | 0,622 | 0,062 | 0 | 0,9 | 0,472 | 0,918 |
| HTR1B  | PTGER3  | 9606.ENSPO0000358963 | 9606.ENSPO0000349003 | 0 | 0 | 0 | 0     | 0     | 0 | 0,9 | 0,064 | 0,902 |
| HTR1B  | OXER1   | 9606.ENSPO0000358963 | 9606.ENSPO0000367930 | 0 | 0 | 0 | 0     | 0     | 0 | 0,9 | 0     | 0,9   |
| HTR1B  | TAS2R31 | 9606.ENSPO0000358963 | 9606.ENSPO0000375093 | 0 | 0 | 0 | 0     | 0     | 0 | 0,9 | 0     | 0,9   |
| HTR1B  | TAS2R38 | 9606.ENSPO0000358963 | 9606.ENSPO0000448219 | 0 | 0 | 0 | 0     | 0     | 0 | 0,9 | 0     | 0,9   |
| HTR1B  | TAS2R41 | 9606.ENSPO0000358963 | 9606.ENSPO0000386201 | 0 | 0 | 0 | 0     | 0     | 0 | 0,9 | 0,09  | 0,905 |
| HTR1F  | MCHR2   | 9606.ENSPO0000322924 | 9606.ENSPO0000281806 | 0 | 0 | 0 | 0,598 | 0     | 0 | 0,9 | 0,221 | 0,907 |
| HTR1F  | TAS2R41 | 9606.ENSPO0000322924 | 9606.ENSPO0000386201 | 0 | 0 | 0 | 0     | 0     | 0 | 0,9 | 0     | 0,9   |
| HTR1F  | TAS2R38 | 9606.ENSPO0000322924 | 9606.ENSPO0000448219 | 0 | 0 | 0 | 0     | 0     | 0 | 0,9 | 0     | 0,9   |
| HTR1F  | TAS2R31 | 9606.ENSPO0000322924 | 9606.ENSPO0000375093 | 0 | 0 | 0 | 0     | 0     | 0 | 0,9 | 0     | 0,9   |
| HTR1F  | TAS2R60 | 9606.ENSPO0000322924 | 9606.ENSPO0000327724 | 0 | 0 | 0 | 0     | 0     | 0 | 0,9 | 0     | 0,9   |

|         |         |                      |                      |   |   |   |       |       |   |      |       |       |
|---------|---------|----------------------|----------------------|---|---|---|-------|-------|---|------|-------|-------|
| HTR1F   | PTGER3  | 9606.ENSPO0000322924 | 9606.ENSPO0000349003 | 0 | 0 | 0 | 0     | 0     | 0 | 0,9  | 0,058 | 0,901 |
| HTR1F   | NPY2R   | 9606.ENSPO0000322924 | 9606.ENSPO0000332591 | 0 | 0 | 0 | 0,6   | 0,062 | 0 | 0,9  | 0     | 0,902 |
| HTR1F   | OPRL1   | 9606.ENSPO0000322924 | 9606.ENSPO0000336764 | 0 | 0 | 0 | 0,588 | 0,062 | 0 | 0,9  | 0,169 | 0,907 |
| HTR1F   | OXER1   | 9606.ENSPO0000322924 | 9606.ENSPO0000367930 | 0 | 0 | 0 | 0     | 0     | 0 | 0,9  | 0,164 | 0,912 |
| HTR2C   | NPSR1   | 9606.ENSPO0000276198 | 9606.ENSPO0000370950 | 0 | 0 | 0 | 0,577 | 0,062 | 0 | 0,9  | 0,164 | 0,907 |
| HTR2C   | MCHR2   | 9606.ENSPO0000276198 | 9606.ENSPO0000281806 | 0 | 0 | 0 | 0,582 | 0,085 | 0 | 0,9  | 0,192 | 0,91  |
| HTR6    | RAMP2   | 9606.ENSPO0000289753 | 9606.ENSPO0000253796 | 0 | 0 | 0 | 0     | 0     | 0 | 0,9  | 0     | 0,9   |
| HTR6    | NPSR1   | 9606.ENSPO0000289753 | 9606.ENSPO0000370950 | 0 | 0 | 0 | 0     | 0,061 | 0 | 0,9  | 0     | 0,902 |
| HTR6    | MC5R    | 9606.ENSPO0000289753 | 9606.ENSPO0000318077 | 0 | 0 | 0 | 0,597 | 0     | 0 | 0,9  | 0,138 | 0,904 |
| HTR6    | LHCGR   | 9606.ENSPO0000289753 | 9606.ENSPO0000294954 | 0 | 0 | 0 | 0     | 0,044 | 0 | 0,9  | 0,1   | 0,906 |
| KCNE1L  | KCNH2   | 9606.ENSPO0000361173 | 9606.ENSPO0000262186 | 0 | 0 | 0 | 0     | 0,061 | 0 | 0,9  | 0,625 | 0,961 |
| KCNE3   | KCNH2   | 9606.ENSPO0000310557 | 9606.ENSPO0000262186 | 0 | 0 | 0 | 0     | 0     | 0 | 0,9  | 0,685 | 0,967 |
| KIR3DL1 | KLRC1   | 9606.ENSPO0000375608 | 9606.ENSPO0000438038 | 0 | 0 | 0 | 0     | 0,072 | 0 | 0,8  | 0,843 | 0,968 |
| KLRC1   | KLRC4   | 9606.ENSPO0000438038 | 9606.ENSPO0000310216 | 0 | 0 | 0 | 0,956 | 0,137 | 0 | 0,9  | 0,745 | 0,912 |
| LAIR1   | PLAUR   | 9606.ENSPO0000375622 | 9606.ENSPO0000339328 | 0 | 0 | 0 | 0     | 0     | 0 | 0,9  | 0,049 | 0,9   |
| LAIR1   | TARM1   | 9606.ENSPO0000375622 | 9606.ENSPO0000439454 | 0 | 0 | 0 | 0,616 | 0,061 | 0 | 0,9  | 0     | 0,902 |
| LHCGR   | RAMP2   | 9606.ENSPO0000294954 | 9606.ENSPO0000253796 | 0 | 0 | 0 | 0     | 0     | 0 | 0,9  | 0,047 | 0,9   |
| LHCGR   | MC5R    | 9606.ENSPO0000294954 | 9606.ENSPO0000318077 | 0 | 0 | 0 | 0     | 0,044 | 0 | 0,9  | 0,071 | 0,903 |
| LHCGR   | NPSR1   | 9606.ENSPO0000294954 | 9606.ENSPO0000370950 | 0 | 0 | 0 | 0     | 0,044 | 0 | 0,9  | 0,178 | 0,914 |
| LRRTM2  | NRXN1   | 9606.ENSPO0000274711 | 9606.ENSPO0000385142 | 0 | 0 | 0 | 0     | 0,16  | 0 | 0,9  | 0,84  | 0,985 |
| LRRTM3  | NRXN1   | 9606.ENSPO0000355187 | 9606.ENSPO0000385142 | 0 | 0 | 0 | 0     | 0,3   | 0 | 0,9  | 0,673 | 0,975 |
| MC5R    | RAMP2   | 9606.ENSPO0000318077 | 9606.ENSPO0000253796 | 0 | 0 | 0 | 0     | 0     | 0 | 0,9  | 0,056 | 0,901 |
| MC5R    | NPSR1   | 9606.ENSPO0000318077 | 9606.ENSPO0000370950 | 0 | 0 | 0 | 0     | 0     | 0 | 0,9  | 0,256 | 0,922 |
| MCHR2   | TAS2R31 | 9606.ENSPO0000281806 | 9606.ENSPO0000375093 | 0 | 0 | 0 | 0     | 0     | 0 | 0,9  | 0     | 0,9   |
| MCHR2   | PTGER3  | 9606.ENSPO0000281806 | 9606.ENSPO0000349003 | 0 | 0 | 0 | 0     | 0     | 0 | 0,9  | 0     | 0,9   |
| MCHR2   | TAS2R41 | 9606.ENSPO0000281806 | 9606.ENSPO0000386201 | 0 | 0 | 0 | 0     | 0     | 0 | 0,9  | 0     | 0,9   |
| MCHR2   | TAS2R60 | 9606.ENSPO0000281806 | 9606.ENSPO0000327724 | 0 | 0 | 0 | 0     | 0     | 0 | 0,9  | 0     | 0,9   |
| MCHR2   | TAS2R38 | 9606.ENSPO0000281806 | 9606.ENSPO0000448219 | 0 | 0 | 0 | 0     | 0     | 0 | 0,9  | 0,056 | 0,901 |
| MCHR2   | OPRL1   | 9606.ENSPO0000281806 | 9606.ENSPO0000367930 | 0 | 0 | 0 | 0,723 | 0     | 0 | 0,9  | 0,161 | 0,903 |
| MCHR2   | NPSR1   | 9606.ENSPO0000281806 | 9606.ENSPO0000370950 | 0 | 0 | 0 | 0,608 | 0     | 0 | 0,9  | 0,17  | 0,905 |
| MCHR2   | NPY2R   | 9606.ENSPO0000281806 | 9606.ENSPO0000332591 | 0 | 0 | 0 | 0,628 | 0,07  | 0 | 0,9  | 0,198 | 0,908 |
| MCHR2   | OXER1   | 9606.ENSPO0000281806 | 9606.ENSPO0000367930 | 0 | 0 | 0 | 0,601 | 0     | 0 | 0,9  | 0,368 | 0,913 |
| MUC17   | MUC3A   | 9606.ENSPO0000302716 | 9606.ENSPO0000368771 | 0 | 0 | 0 | 0,552 | 0,139 | 0 | 0,9  | 0,789 | 0,941 |
| NPSR1   | RAMP2   | 9606.ENSPO0000370950 | 9606.ENSPO0000253796 | 0 | 0 | 0 | 0     | 0     | 0 | 0,9  | 0,041 | 0,9   |
| NPY2R   | TAS2R60 | 9606.ENSPO0000332591 | 9606.ENSPO0000327724 | 0 | 0 | 0 | 0     | 0     | 0 | 0,9  | 0     | 0,9   |
| NPY2R   | TAS2R31 | 9606.ENSPO0000332591 | 9606.ENSPO0000375093 | 0 | 0 | 0 | 0     | 0     | 0 | 0,9  | 0     | 0,9   |
| NPY2R   | PTGER3  | 9606.ENSPO0000332591 | 9606.ENSPO0000349003 | 0 | 0 | 0 | 0     | 0     | 0 | 0,9  | 0     | 0,9   |
| NPY2R   | OXER1   | 9606.ENSPO0000332591 | 9606.ENSPO0000367930 | 0 | 0 | 0 | 0,576 | 0     | 0 | 0,9  | 0,126 | 0,903 |
| NPY2R   | TAS2R41 | 9606.ENSPO0000332591 | 9606.ENSPO0000386201 | 0 | 0 | 0 | 0     | 0     | 0 | 0,9  | 0,103 | 0,906 |
| NPY2R   | TAS2R38 | 9606.ENSPO0000332591 | 9606.ENSPO0000448219 | 0 | 0 | 0 | 0     | 0     | 0 | 0,9  | 0,103 | 0,906 |
| NPY2R   | OPRL1   | 9606.ENSPO0000332591 | 9606.ENSPO0000336764 | 0 | 0 | 0 | 0,673 | 0,077 | 0 | 0,9  | 0,421 | 0,916 |
| OPRL1   | TAS2R60 | 9606.ENSPO0000336764 | 9606.ENSPO0000327724 | 0 | 0 | 0 | 0     | 0     | 0 | 0,9  | 0     | 0,9   |
| OPRL1   | TAS2R31 | 9606.ENSPO0000336764 | 9606.ENSPO0000375093 | 0 | 0 | 0 | 0     | 0     | 0 | 0,9  | 0     | 0,9   |
| OPRL1   | TAS2R41 | 9606.ENSPO0000336764 | 9606.ENSPO0000386201 | 0 | 0 | 0 | 0     | 0     | 0 | 0,9  | 0     | 0,9   |
| OPRL1   | TAS2R38 | 9606.ENSPO0000336764 | 9606.ENSPO0000448219 | 0 | 0 | 0 | 0     | 0     | 0 | 0,9  | 0     | 0,9   |
| OPRL1   | OXER1   | 9606.ENSPO0000336764 | 9606.ENSPO0000367930 | 0 | 0 | 0 | 0,604 | 0,076 | 0 | 0,9  | 0,069 | 0,904 |
| OPRL1   | PTGER3  | 9606.ENSPO0000336764 | 9606.ENSPO0000349003 | 0 | 0 | 0 | 0     | 0     | 0 | 0,9  | 0,232 | 0,919 |
| OXER1   | TAS2R60 | 9606.ENSPO0000367930 | 9606.ENSPO0000327724 | 0 | 0 | 0 | 0     | 0     | 0 | 0,9  | 0     | 0,9   |
| OXER1   | PTGER3  | 9606.ENSPO0000367930 | 9606.ENSPO0000349003 | 0 | 0 | 0 | 0     | 0     | 0 | 0,9  | 0,065 | 0,902 |
| OXER1   | TAS2R31 | 9606.ENSPO0000367930 | 9606.ENSPO0000375093 | 0 | 0 | 0 | 0     | 0     | 0 | 0,9  | 0     | 0,9   |
| OXER1   | TAS2R41 | 9606.ENSPO0000367930 | 9606.ENSPO0000386201 | 0 | 0 | 0 | 0     | 0     | 0 | 0,9  | 0     | 0,9   |
| OXER1   | TAS2R38 | 9606.ENSPO0000367930 | 9606.ENSPO0000448219 | 0 | 0 | 0 | 0     | 0     | 0 | 0,9  | 0     | 0,9   |
| P2RX5   | P2RX7   | 9606.ENSPO0000225328 | 9606.ENSPO0000330696 | 0 | 0 | 0 | 0,815 | 0,063 | 0 | 0,9  | 0,819 | 0,916 |
| PLAUR   | TARM1   | 9606.ENSPO0000339328 | 9606.ENSPO0000439454 | 0 | 0 | 0 | 0     | 0     | 0 | 0,9  | 0     | 0,9   |
| PTGER3  | TAS2R60 | 9606.ENSPO0000349003 | 9606.ENSPO0000327724 | 0 | 0 | 0 | 0     | 0     | 0 | 0,9  | 0,049 | 0,9   |
| PTGER3  | TAS2R31 | 9606.ENSPO0000349003 | 9606.ENSPO0000375093 | 0 | 0 | 0 | 0     | 0     | 0 | 0,9  | 0     | 0,9   |
| PTGER3  | TAS2R38 | 9606.ENSPO0000349003 | 9606.ENSPO0000448219 | 0 | 0 | 0 | 0     | 0     | 0 | 0,9  | 0,042 | 0,9   |
| PTGER3  | TAS2R41 | 9606.ENSPO0000349003 | 9606.ENSPO0000386201 | 0 | 0 | 0 | 0     | 0     | 0 | 0,9  | 0,145 | 0,91  |
| SCN11A  | SCN2B   | 9606.ENSPO0000307599 | 9606.ENSPO0000278947 | 0 | 0 | 0 | 0     | 0     | 0 | 0,9  | 0,428 | 0,94  |
| SCN11A  | SCN1B   | 9606.ENSPO0000307599 | 9606.ENSPO0000396915 | 0 | 0 | 0 | 0     | 0     | 0 | 0,9  | 0,558 | 0,953 |
| SCN1B   | SCN2B   | 9606.ENSPO0000396915 | 9606.ENSPO0000278947 | 0 | 0 | 0 | 0     | 0,14  | 0 | 0,72 | 0,887 | 0,97  |
| SCN1B   | SCN9A   | 9606.ENSPO0000396915 | 9606.ENSPO0000386306 | 0 | 0 | 0 | 0     | 0     | 0 | 0,9  | 0,757 | 0,974 |
| SCN2B   | SCN9A   | 9606.ENSPO0000278947 | 9606.ENSPO0000386306 | 0 | 0 | 0 | 0     | 0,062 | 0 | 0,9  | 0,59  | 0,958 |
| TAS2R31 | TAS2R60 | 9606.ENSPO0000375093 | 9606.ENSPO0000327724 | 0 | 0 | 0 | 0,653 | 0     | 0 | 0,9  | 0,6   | 0,92  |
| TAS2R31 | TAS2R41 | 9606.ENSPO0000375093 | 9606.ENSPO0000386201 | 0 | 0 | 0 | 0,739 | 0     | 0 | 0,9  | 0,587 | 0,914 |
| TAS2R31 | TAS2R38 | 9606.ENSPO0000375093 | 9606.ENSPO0000448219 | 0 | 0 | 0 | 0,688 | 0,061 | 0 | 0,9  | 0,8   | 0,926 |
| TAS2R38 | TAS2R60 | 9606.ENSPO0000448219 | 9606.ENSPO0000327724 | 0 | 0 | 0 | 0,619 | 0,049 | 0 | 0,9  | 0,656 | 0,925 |
| TAS2R38 | TAS2R41 | 9606.ENSPO0000448219 | 9606.ENSPO0000386201 | 0 | 0 | 0 | 0,693 | 0,061 | 0 | 0,9  | 0,601 | 0,919 |
| TAS2R41 | TAS2R60 | 9606.ENSPO0000386201 | 9606.ENSPO0000327724 | 0 | 0 | 0 | 0,892 | 0,141 | 0 | 0,9  | 0,736 | 0,917 |
