# Supplementary material for: Early Reduction of SARS-CoV-2 Replication in Bronchial Epithelium by Kinin B2 Receptor Antagonism
Source: bioRxiv or medRxiv preprint supplement (doi:10.1101/2021.08.13.21262037), 2021-08-18
Supplement: Supplementary file [file media-20.pdf]

**Supplemental Table S18.** Cellular process enrichment analysis output of String network analysis of membrane-bound receptor DEGs comparing SARS-CoV-2 + B2R antagonist versus SARS-CoV-2

| #term ID   | term description    | observed | background | strength | false discovery | matching proteins in your network (labels)                                                                                                                                                                                                                                                                                                                                                                                                                                                                                                                                                                                                                                                                                                                                                                                                                                                                                                                                                                                                                                                                                                                                                                                                                                                                                |
|------------|---------------------|----------|------------|----------|-----------------|---------------------------------------------------------------------------------------------------------------------------------------------------------------------------------------------------------------------------------------------------------------------------------------------------------------------------------------------------------------------------------------------------------------------------------------------------------------------------------------------------------------------------------------------------------------------------------------------------------------------------------------------------------------------------------------------------------------------------------------------------------------------------------------------------------------------------------------------------------------------------------------------------------------------------------------------------------------------------------------------------------------------------------------------------------------------------------------------------------------------------------------------------------------------------------------------------------------------------------------------------------------------------------------------------------------------------|
| GO:0007186 | G protein-coupled r | 111      | 1247       | 0,76     | 6,77E-49        | GPR63,OR7C1,RAMP2,CHRM3,GPR133,SORCS1,GABRA6,GABRB2,HTR2C,MCHR2,GPR15,HTR6,LHCG R,F2RL2,OR4K2,OR10A5,GALR1,OR51B5,C3AR1,OR10V1,OR52K1,OR9I1,OR1B1,OR7G2,OR8U1,OR6 Y1,GPR151,GPRC6A,OR10H5,OR2Y1,EDNRA,HTR1A,OR7A5,MCSR,GPR62,OR4K13,OR4K5,GHFRHR,OR 4S1,OR6B3,OR5AK2,OR52N5,HTR1F,OR8H1,OR8K5,OR10G4,OR52D1,TAS2R60,OR2T10,OR1G1,NPY2 R,OR6P1,GRK1,OR5D18,OPRL1,OR13H1,OR2AG2,ADRB3,OR6N2,OR5H2,OR2T6,OR52R1,PTGER3,CC RL2,OR8D1,OR5AC2,OR6K2,OR2M2,OR5B21,OR2T5,OR2T1,OR6K3,OR10R2,HTR1B,AGTR2,OR1N2,CN R2,OR13C5,OR10G9,OR4D1,GABBR1,OR5V1,OR2J2,OXER1,OR6C65,OR6C75,OR10A4,OR51B4,NPSR 1,OR5K1,TAS2R31,OR6C4,GRM2,OR2A14,OR1C1,OR2A25,TAS2R41,CALCRL,OR5K2,CXCR6,OR5H14, ESR1,CASR,GABRA2,TRPM1,OR13C2,GPR19,TAS2R38,OR1D5,OR8G1,GPR1                                                                                                                                                                                                                                                                                                                                                                                                                                                                                                                                                                                  |
| GO:0003008 | system process      | 126      | 1827       | 0,65     | 1,05E-45        | CLIC5,AQP9,P2RX5,KCNJ8,OR7C1,KCNA5,RAMP2,CHRM3,KCNH2,HPN,KCNQ4,CACNA1C,GABRB2,SC N2B,CHRN3,LHCGR,OR4K2,OR10A5,OR51B5,C3AR1,OR10V1,OR52K1,OR9I1,OR1B1,OR7G2,OR8U1, SLC26A5,OR6Y1,SCN11A,CD34,OR10H5,OR2Y1,KCNK10,EDNRA,HTR1A,OR7A5,OR4K13,KCNMB3,OR 4K5,CACNB2,OR4S1,OR6B3,OR5AK2,OR52N5,SLC2A2,OR8H1,OR8K5,OR10G4,OR52D1,TAS2R60,CN GA2,OR2T10,CALHM1,GRID1,P2RX7,OR1G1,IJGDC3,OR6P1,GRK1,OR5D18,OPRL1,CLCN1,OR13H1,O R2AG2,ADRB3,OR6N2,OR5H2,OR2T6,OR52R1,PTGER3,OR8D1,OR5AC2,KCNK5,OR6K2,OR2M2,OR5B2 1,GRIN3A,OR2T5,OR2T1,OR6K3,OR10R2,CHRN2,HTR1B,CACNA1B,GRIN1,AGTR2,KCNE1L,OR1N2,M USK,CNR2,OR13C5,OR10G9,OR4D1,OR5V1,OR2J2,SLC22A6,SCNN1D,OR6C65,OR6C75,OR10A4,OR51 B4,OR5K1,ACVRL1,TAS2R31,OR6C4,GRIN2A,SLITRK6,CACNA1I,NRXN1,OR2A14,OR1C1,OR2A25,TAS 2R41,SCN9A,SLC12A5,OR5K2,SCN1B,OR5H14,CASR,TRPM1,OR13C2,TAS2R38,OR1D5,OR8G1,GRIN2 B,GRIA3                                                                                                                                                                                                                                                                                                                                                                                                                                                                    |
| GO:0023052 | signaling           | 201      | 5108       | 0,41     | 5,23E-45        | RIPK3,P2RX5,CD69,GPR63,PCDH6,TREM1,OR7C1,KCNA5,RAMP2,CHRM3,DCLK1,SIT1,GPR133,KCNH 2,HPN,SORCS1,IL1RL2,CACNA1C,GABRA6,GABRB2,HTR2C,SLC1A2,MS4A2,SCN2B,CD226,MCHR2,GP R15,HTR6,CHRN3,LILRA4,FGFR4,LHCGR,F2RL2,CLEC1B,OR4K2,OR10A5,GALR1,CD30,OR51B5,C3A R1,OR10V1,OR52K1,OR9I1,MUC17,OR1B1,OR7G2,OR8U1,OR6Y1,SLAMF1,SCN11A,GPR151,GPRC6A, CD34,KCNB3,OR10H5,OR2Y1,CSPG4,KCNK10,EDNRA,HTR1A,OR7A5,MCSR,GPR62,OR4K13,KCNMB3, OR4K5,CACNB2,GHRHR,OR4S1,OR6B3,OR5AK2,OR52N5,HTR1F,OR8H1,OR8K5,OR10G4,OR52D1,TAS 2R60,OR2T10,GRID1,RTN4RL1,P2RX7,OR1G1,NPY2R,OR6P1,GRK1,OR5D18,OPRL1,PLAUR,KIR2DL4, CLCN1,OR13H1,NEO1,NCR3,ERBB4,OR2AG2,ADRB3,OR6N2,OR5H2,RET,TFNRSF14,OR2T6,OR52R1,PT GER3,CCRL2,OR8D1,OR5AC2,OR6K2,OR2M2,FXRG,OR5B21,NTRK3,GRIN3A,LRRTM3,OR2T5,OR2T1, ESRRG,SLC22A2,GPA33,DDR2,FCGR3A,CD244,OR6K3,OR10R2,CHRN2,ROS1,FCGR1B,CD2,HTR1B,L PPR4,CACNA1B,GRIN1,KCNB1,AGTR2,KCNE1L,IRS4,EPHA10,OR1N2,MUSK,CNR2,OR13C5,OR10G9,O R4D1,GABBR1,OR5V1,OR2J2,OXER1,TFNRSF4,MUC3A,OR6C65,OR6C75,OR10A4,OR51B4,NPSR1,SIR PB1,OR5K1,ACVRL1,EPHA6,TAS2R31,KIR3DL1,OR6C4,GRM2,GRIN2A,CSF2RB,CACNA1I,NRXN1,OR2A 14,OR1C1,OR2A25,TAS2R41,SCN9A,CD8A,CALCRL,SLC12A5,OR5K2,CXCR6,SCN1B,OR5H14,ESR1,PT PRC,HFE,CASR,GABRA2,ESRRB,MPZ,PCDH5,TRPM1,KLRC1,OR13C2,GPR19,TAS2R38,KCN2,MRC1, OR1D5,ZP2,OR8G1,GRIN2B,GPR1,ANTXR1,GRIA3,PRLR |
| GO:0007154 | cell communication  | 200      | 5219       | 0,39     | 6,64E-43        | RIPK3,P2RX5,CD69,GPR63,PCDH6,TREM1,OR7C1,KCNA5,RAMP2,CHRM3,DCLK1,SIT1,GPR133,KCNH 2,HPN,SORCS1,IL1RL2,CACNA1C,GABRA6,GABRB2,HTR2C,SLC1A2,MS4A2,SCN2B,CD226,MCHR2,GP R15,HTR6,CHRN3,LILRA4,FGFR4,LHCGR,F2RL2,CLEC1B,OR4K2,OR10A5,GALR1,CD30,OR51B5,C3A R1,OR10V1,OR52K1,OR9I1,MUC17,OR1B1,OR7G2,OR8U1,OR6Y1,SLAMF1,SCN11A,GPR151,GPRC6A, CD34,OR10H5,OR2Y1,CSPG4,KCNK10,EDNRA,HTR1A,OR7A5,MCSR,GPR62,OR4K13,KCNMB3,OR4K5, CACNB2,GHRHR,OR4S1,OR6B3,OR5AK2,OR52N5,HTR1F,OR8H1,OR8K5,OR10G4,OR52D1,TAS2R60,O R2T10,GRID1,RTN4RL1,P2RX7,OR1G1,NPY2R,OR6P1,GRK1,OR5D18,OPRL1,PLAUR,KIR2DL4,CLCN1, OR13H1,NEO1,NCR3,ERBB4,OR2AG2,ADRB3,OR6N2,OR5H2,RET,TFNRSF14,OR2T6,OR52R1,PTGER3, CCRL2,OR8D1,OR5AC2,OR6K2,OR2M2,FXRG,OR5B21,NTRK3,GRIN3A,LRRTM3,OR2T5,OR2T1,ESRRG, SLC22A2,GPA33,DDR2,FCGR3A,CD244,OR6K3,OR10R2,CHRN2,ROS1,FCGR1B,CD2,HTR1B,LPPR4,C ACNA1B,GRIN1,KCNB1,AGTR2,KCNE1L,IRS4,EPHA10,OR1N2,MUSK,CNR2,OR13C5,OR10G9,OR4D1,GA BBR1,OR5V1,OR2J2,OXER1,TFNRSF4,MUC3A,OR6C65,OR6C75,OR10A4,OR51B4,NPSR1,SIRPB1,OR 5K1,ACVRL1,EPHA6,TAS2R31,KIR3DL1,OR6C4,GRM2,GRIN2A,CSF2RB,CACNA1I,NRXN1,OR2A14,OR 1C1,OR2A25,TAS2R41,SCN9A,CD8A,CALCRL,SLC12A5,OR5K2,CXCR6,SCN1B,OR5H14,ESR1,PTPRC, HFE,CASR,GABRA2,ESRRB,MPZ,PCDH5,TRPM1,KLRC1,OR13C2,GPR19,TAS2R38,KCN2,MRC1,OR1D 5,ZP2,OR8G1,GRIN2B,GPR1,ANTXR1,GRIA3,PRLR       |
| GO:0050877 | nervous system pro  | 104      | 1271       | 0,72     | 1,01E-42        | CLIC5,P2RX5,OR7C1,HPN,KCNQ4,GABRB2,CHRN3,LHCGR,OR4K2,OR10A5,OR51B5,OR10V1,OR52K 1,OR9I1,OR1B1,OR7G2,OR8U1,SLC26A5,OR6Y1,SCN11A,OR10H5,OR2Y1,KCNK10,EDNRA,HTR1A,OR 7A5,OR4K13,KCNMB3,OR4K5,CACNB2,OR4S1,OR6B3,OR5AK2,OR52N5,OR8H1,OR8K5,OR10G4,OR52D1,TAS2R60,CN GA2,OR2T10,CALHM1,GRID1,P2RX7,OR1G1,IJGDC3,OR6P1,GRK1,OR5D18,OPRL1,CLCN1,OR13H1,O R2AG2,OR6N2,OR5H2,OR2T6,OR52R1,OR8D1,OR5AC2,OR6K2,OR2M2,OR5B21,GRIN3A,OR2T5,OR2J 2,OR6K3,OR10R2,CHRN2,GRIN1,AGTR2,OR1N2,MUSK,CNR2,OR13C5,OR10G9,OR4D1,OR5V1,OR2J 2,SCNN1D,OR6C65,OR6C75,OR10A4,OR51B4,OR5K1,TAS2R31,OR6C4,GRIN2A,SLITRK6,CACNA1I,NR XN1,OR2A14,OR1C1,OR2A25,TAS2R41,SCN9A,SLC12A5,OR5K2,SCN1B,OR5H14,TRPM1,OR13C2,TAS 2R38,OR1D5,OR8G1,GRIN2B,GRIA3                                                                                                                                                                                                                                                                                                                                                                                                                                                                                                                                                                                                     |
| GO:0007606 | sensory perception  | 70       | 487        | 0,97     | 2,54E-41        | OR7C1,OR4K2,OR10A5,OR51B5,OR10V1,OR52K1,OR9I1,OR1B1,OR7G2,OR8U1,OR6Y1,OR10H5,OR2 Y1,OR7A5,OR4K13,OR4K5,OR4S1,OR6B3,OR5AK2,OR52N5,OR8H1,OR8K5,OR10G4,OR52D1,TAS2R6 0,CNGA2,OR2T10,CALHM1,OR1G1,OR6P1,OR5D18,OR13H1,OR2AG2,OR6N2,OR5H2,OR2T6,OR52R1, OR8D1,OR5AC2,OR6K2,OR2M2,OR5B21,OR2T5,OR2T1,OR6K3,OR10R2,OR1N2,OR13C5,OR10G9,OR4 D1,OR5V1,OR2J2,SCNN1D,OR6C65,OR6C75,OR10A4,OR51B4,OR5K1,TAS2R31,OR6C4,OR2A14,OR1C 1,OR2A25,TAS2R41,OR5K2,OR5H14,OR13C2,TAS2R38,OR1D5,OR8G1                                                                                                                                                                                                                                                                                                                                                                                                                                                                                                                                                                                                                                                                                                                                                                                                                                            |
| GO:0050911 | detection of chemic | 63       | 385        | 1,03     | 7,18E-40        | OR7C1,OR4K2,OR10A5,OR51B5,OR10V1,OR52K1,OR9I1,OR1B1,OR7G2,OR8U1,OR6Y1,OR10H5,OR2 Y1,OR7A5,OR4K13,OR4K5,OR4S1,OR6B3,OR5AK2,OR52N5,OR8H1,OR8K5,OR10G4,OR52D1,OR2T10, OR1G1,OR6P1,OR5D18,OR13H1,OR2AG2,OR6N2,OR5H2,OR2T6,OR52R1,OR8D1,OR5AC2,OR6K2,OR2 M2,OR5B21,OR2T5,OR2T1,OR6K3,OR10R2,OR1N2,OR13C5,OR10G9,OR4D1,OR5V1,OR2J2,OR6C65,O R6C75,OR10A4,OR51B4,OR5K1,OR6C4,OR2A14,OR1C1,OR2A25,OR5K2,OR5H14,OR13C2,OR1D5,OR 8G1                                                                                                                                                                                                                                                                                                                                                                                                                                                                                                                                                                                                                                                                                                                                                                                                                                                                                                |
| GO:0007608 | sensory perception  | 64       | 413        | 1        | 2,36E-39        | OR7C1,OR4K2,OR10A5,OR51B5,OR10V1,OR52K1,OR9I1,OR1B1,OR7G2,OR8U1,OR6Y1,OR10H5,OR2 Y1,OR7A5,OR4K13,OR4K5,OR4S1,OR6B3,OR5AK2,OR52N5,OR8H1,OR8K5,OR10G4,OR52D1,CNGA2, OR2T10,OR1G1,OR6P1,OR5D18,OR13H1,OR2AG2,OR6N2,OR5H2,OR2T6,OR52R1,OR8D1,OR5AC2,OR 6K2,OR2M2,OR5B21,OR2T5,OR2T1,OR6K3,OR10R2,OR1N2,OR13C5,OR10G9,OR4D1,OR5V1,OR2J2,O R6C65,OR6C75,OR10A4,OR51B4,OR5K1,OR6C4,OR2A14,OR1C1,OR2A25,OR5K2,OR5H14,OR13C2,OR 1D5,OR8G1                                                                                                                                                                                                                                                                                                                                                                                                                                                                                                                                                                                                                                                                                                                                                                                                                                                                                          |
| GO:0009593 | detection of chemic | 67       | 469        | 0,97     | 2,36E-39        | OR7C1,OR4K2,OR10A5,OR51B5,OR10V1,OR52K1,OR9I1,OR1B1,OR7G2,OR8U1,OR6Y1,OR10H5,OR2 Y1,OR7A5,OR4K13,KCNMB3,OR4K5,OR4S1,OR6B3,OR5AK2,OR52N5,OR8H1,OR8K5,OR10G4,OR52D1, OR2T10,OR1G1,OR6P1,OR5D18,OR13H1,OR2AG2,OR6N2,OR5H2,OR2T6,OR52R1,OR8D1,OR5AC2,OR 6K2,OR2M2,OR5B21,OR2T5,OR2T1,OR6K3,OR10R2,OR1N2,OR13C5,OR10G9,OR4D1,OR5V1,OR2J2, OR6C65,OR6C75,OR10A4,OR51B4,OR5K1,TAS2R31,OR6C4,OR2A14,OR1C1,OR2A25,OR5K2,OR5H14, CASR,OR13C2,TAS2R38,OR1D5,OR8G1                                                                                                                                                                                                                                                                                                                                                                                                                                                                                                                                                                                                                                                                                                                                                                                                                                                                    |
| GO:0050907 | detection of chemic | 65       | 431        | 0,99     | 2,36E-39        | OR7C1,OR4K2,OR10A5,OR51B5,OR10V1,OR52K1,OR9I1,OR1B1,OR7G2,OR8U1,OR6Y1,OR10H5,OR2 Y1,OR7A5,OR4K13,OR4K5,OR4S1,OR6B3,OR5AK2,OR52N5,OR8H1,OR8K5,OR10G4,OR52D1,OR2T10, OR1G1,OR6P1,OR5D18,OR13H1,OR2AG2,OR6N2,OR5H2,OR2T6,OR52R1,OR8D1,OR5AC2,OR6K2,OR2 M2,OR5B21,OR2T5,OR2T1,OR6K3,OR10R2,OR1N2,OR13C5,OR10G9,OR4D1,OR5V1,OR2J2,OR6C65,O R6C75,OR10A4,OR51B4,OR5K1,TAS2R31,OR6C4,OR2A14,OR1C1,OR2A25,OR5K2,OR5H14,OR13C2,T AS2R38,OR1D5,OR8G1                                                                                                                                                                                                                                                                                                                                                                                                                                                                                                                                                                                                                                                                                                                                                                                                                                                                                |

|            |                       |     |      |      |          |                                                                                                                                                                                                                                                                                                                                                                                                                                                                                                                                                                                                                                                                                                                                                                                                                                                                                                                                                                                                                                                                                                                                                                                                                                                                                                                                                                                                                                                                                   |
|------------|-----------------------|-----|------|------|----------|-----------------------------------------------------------------------------------------------------------------------------------------------------------------------------------------------------------------------------------------------------------------------------------------------------------------------------------------------------------------------------------------------------------------------------------------------------------------------------------------------------------------------------------------------------------------------------------------------------------------------------------------------------------------------------------------------------------------------------------------------------------------------------------------------------------------------------------------------------------------------------------------------------------------------------------------------------------------------------------------------------------------------------------------------------------------------------------------------------------------------------------------------------------------------------------------------------------------------------------------------------------------------------------------------------------------------------------------------------------------------------------------------------------------------------------------------------------------------------------|
| GO:0007165 | signal transduction   | 185 | 4738 | 0,4  | 2,93E-39 | RIPK3,P2RX5,CD69,GPR63,TREM1,OR7C1,KCNA5,RAMP2,CHRM3,DCLK1,SIT1,GPR133,KCNH2,HPN,SORCS1,IL1RL2,CACNA1C,GABRA6,GABRB2,HTR2C,MS4A2,CD226,MCHR2,GPR15,HTF6,CHRN3,LILRA4,FGFR4,LHCGR,F2RL2,CLEC1B,OR4K2,OR10A5,GALR1,CD3D,OR51B5,C3AR1,OR10V1,OR52K1,OR911,MUC17,OR1B1,OR7G2,OR8U1,OR6Y1,SLAMF1,GPR151,GPRC6A,CD34,OR10H5,OR2Y1,CSPG4,KCNK10,EDNRA,HTF1A,OR7A5,MC5R,GPR62,OR4K13,OR4K5,GHRHR,OR4S1,OR6B3,OR5AK2,OR52N5,HTF1F,OR8H1,OR8K5,OR10G4,OR52D1,TAS2R60,OR2T10,GRID1,RTN4RL1,P2RX7,OR1G1,NPY2R,OR6P1,GRK1,OR5D18,OPRL1,PLAUR,KIR2DL4,OR13H1,NEO1,NCR3,ERBB4,OR2AG2,ADRB3,OR6N2,OR5H2,RET,TNFRSF14,OR2T6,OR52R1,PTGER3,CCRL2,OR8D1,OR5AC2,OR6K2,ORXRG,OR5B21,NTRK3,GRIN3A,LRRTM3,OR2T5,OR2T1,ESRRG,GA33,DDR2,FCGR3A,CD244,OR6K3,OR10R2,CHRN2B,ROS1,FCGR1B,CD2,HTR1B,LPPR4,GRIN1,KCNB1,AGTR2,IRS4,EPHA10,OR1N2,MUSK,CNR2,OR13C5,OR10G9,OR4D1,GABBR1,OR5V1,OR2J2,OXER1,TNFRSF4,MUC3A,OR6C65,OR6C75,OR10A4,OR51B4,NPSR1,SIRPB1,OR5K1,ACVRL1,EPHA6,TAS2R31,KIR3DL1,OR6C4,GRM2,GRIN2A,CSF2RB,CACNA11,NRXN1,OR2A14,OR1C1,OR2A25,TAS2R41,CD8A,CALCRL,OR5K2,CXCR6,OR5H14,ESR1,PTPRC,HFE,CASR,GABRA2,ESRRB,TRPM1,KLRK1,OR13C2,GPR19,TAS2R38,KCN2C,MRC1,OR1D5,ZP2,OR8G1,GRIN2B,GPR1,ANTXR1,GRIA3,PRLR                                                                                                                                                                                                                                                                                     |
| GO:0007600 | sensory perception    | 86  | 901  | 0,79 | 2,93E-39 | CLIC5,OR7C1,HPN,KCNQ4,GABRB2,OR4K2,OR10A5,OR51B5,OR10V1,OR52K1,OR911,OR1B1,OR7G2,OR8U1,SLC26A5,OR6Y1,OR10H5,OR2Y1,OR7A5,OR4K13,OR4K5,CACNB2,OR4S1,OR52N5,OR8H1,OR8K5,OR10G4,OR52D1,TAS2R60,CNGA2,OR2T10,CALHM1,P2RX7,OR1G1,OR6P1,GRK1,OR5D18,OPRL1,OR13H1,OR2AG2,OR6N2,OR5H2,OR2T6,OR52R1,OR8D1,OR5AC2,OR6K2,OR2M2,OR5B21,OR2T5,OR2T1,OR6K3,OR10R2,CHRN2B,GRIN1,OR1N2,CNR2,OR13C5,OR10G9,OR4D1,OR5V1,OR2J2,SCNN1D,OR6C65,OR6C75,OR10A4,OR51B4,OR5K1,TAS2R31,OR6C4,GRIN2A,SLITRK6,OR2A14,OR1C1,OR2A25,TAS2R41,SCN9A,OR5K2,OR5H14,TRPM1,OR13C2,TAS2R38,OR1D5,OR8G1                                                                                                                                                                                                                                                                                                                                                                                                                                                                                                                                                                                                                                                                                                                                                                                                                                                                                                                  |
| GO:0050906 | detection of stimulus | 66  | 484  | 0,95 | 8,90E-38 | OR7C1,HPN,OR4K2,OR10A5,OR51B5,OR10V1,OR52K1,OR911,OR1B1,OR7G2,OR8U1,OR6Y1,OR10H5,OR2Y1,OR7A5,OR4K13,OR4K5,OR4S1,OR6B3,OR5AK2,OR52N5,OR8H1,OR8K5,OR10G4,OR52D1,OR2T10,OR1G1,OR6P1,OR5D18,OR13H1,OR2AG2,OR6N2,OR5H2,OR2T6,OR52R1,OR8D1,OR5AC2,OR6K2,OR2M2,OR5B21,OR2T5,OR2T1,OR6K3,OR10R2,OR1N2,OR13C5,OR10G9,OR4D1,OR5V1,OR2J2,OR6C65,OR6C75,OR10A4,OR51B4,OR5K1,TAS2R31,OR6C4,OR2A14,OR1C1,OR2A25,OR5K2,OR5H14,OR13C2,TAS2R38,OR1D5,OR8G1                                                                                                                                                                                                                                                                                                                                                                                                                                                                                                                                                                                                                                                                                                                                                                                                                                                                                                                                                                                                                                         |
| GO:0051606 | detection of stimulus | 69  | 638  | 0,85 | 7,81E-34 | OR7C1,HPN,OR4K2,OR10A5,OR51B5,OR10V1,OR52K1,OR911,OR1B1,OR7G2,OR8U1,OR6Y1,OR10H5,OR2Y1,OR7A5,OR4K13,KCNMB3,OR4K5,OR4S1,OR6B3,OR5AK2,OR52N5,OR8H1,OR8K5,OR10G4,OR52D1,OR2T10,OR1G1,OR6P1,GRK1,OR5D18,OR13H1,OR2AG2,OR6N2,OR5H2,OR2T6,OR52R1,OR8D1,OR5AC2,OR6K2,OR2M2,OR5B21,OR2T5,OR2T1,OR6K3,OR10R2,OR1N2,OR13C5,OR10G9,OR4D1,OR5V1,OR2J2,OR6C65,OR6C75,OR10A4,OR51B4,OR5K1,TAS2R31,OR6C4,OR2A14,OR1C1,OR2A25,OR5K2,OR5H14,CASR,OR13C2,TAS2R38,OR1D5,OR8G1                                                                                                                                                                                                                                                                                                                                                                                                                                                                                                                                                                                                                                                                                                                                                                                                                                                                                                                                                                                                                        |
| GO:0050896 | response to stimulus  | 227 | 7824 | 0,27 | 1,55E-32 | RIPK3,AQP8,AQP9,P2RX5,CD69,GPR63,SLC25A2,KCNJ8,TREM1,OR7C1,KCNA5,RAMP2,CHRM3,DCLK1,SIT1,GPR133,KCNH2,HPN,SORCS1,SLC17A6,IL1RL2,CACNA1C,SLC47A1,FCRL4,GABRA6,GABRB2,HTR2C,SLC1A2,MS4A2,SCN2B,CD226,MCHR2,GPR15,HTF6,CHRN3,LILRA4,FGFR4,LHCGR,F2RL2,CLEC1B,OR4K2,OR10A5,GALR1,CD3D,OR51B5,C3AR1,OR10V1,OR52K1,OR911,MUC17,OR1B1,OR7G2,OR8U1,SLC26A5,OR6Y1,SLAMF1,SCN1A,GPR151,GPRC6A,CD34,OR10H5,OR2Y1,CSPG4,KCNK10,EDNRA,HTF1A,OR7A5,MC5R,GPR62,OR4K13,KCNMB3,OR4K5,GHRHR,SLC34A1,OR4S1,OR6B3,OR5AK2,OR52N5,HTF1F,OR8H1,OR8K5,TMEM108,OR10G4,OR52D1,TAS2R60,OR2T10,CALHM1,GRID1,RTN4RL1,P2RX7,OR1G1,NPY2R,OR6P1,GRK1,OR5D18,OPRL1,SLC22A8,PLAUR,KIR2DL4,OR13H1,NEO1,NCR3,ERBB4,TREML4,OR2AG2,ADRB3,OR6N2,SCARA5,OR5H2,RET,TNFRSF14,OR2T6,OR52R1,PTGER3,CCRL2,OR8D1,OR5AC2,OR6K2,OR2M2,RXRG,OR5B21,NTRK3,GRIN3A,LRRTM3,OR2T5,OR2T1,ESRRG,SLC22A2,GA33,DDR2,FCGR3A,CD244,OR6K3,OR10R2,CD1E,CHRN2B,ROS1,FCGR1B,CD2,HTR1B,LPPR4,ENTPD1,CACNA1B,GRIN1,KCNB1,AGTR2,IRS4,EPHA10,OR1N2,MUSK,CNR2,OR13C5,OR10G9,OR4D1,SYNDIG1,GABBR1,OR5V1,OR2J2,SLC22A6,OXER1,SCNN1D,TNFRSF4,MUC3A,OR6C65,OR6C75,OR10A4,OR51B4,NPSR1,SIRPB1,OR5K1,STAB2,ACVRL1,EPHA6,TAS2R31,KIR3DL1,LAIR1,OR6C4,GRM2,LILRA6,GRIN2A,SLC17A3,SLITRK6,GP5,CSF2RB,VSTM2A,CACNA11,NRXN1,OR2A14,OR1C1,OR2A25,TAS2R41,SCN9A,CD8A,CALCRL,SLC12A5,SLC4A10,OR5K2,CXCR6,SCN1B,OR5H14,ESR1,CRACR2A,PTPRC,HFE,TMEM8C,CASR,GABRA2,ESRRB,TRPM1,KLRK1,OR13C2,TARM1,GPR19,TAS2R38,KCN2C,MRC1,OR1D5,ZP2,OR8G1,GRIN2B,GPR1,ANTXR1,GRIA3,PRLR |
| GO:0034220 | ion transmembrane     | 76  | 995  | 0,69 | 2,97E-28 | CLIC5,AQP8,AQP9,P2RX5,SLC5A9,SLC25A2,KCNJ8,SLC17A1,KCNA5,KCNH2,SLC4A1,HPN,KCNQ4,SLC17A6,CACNA1C,SLC47A1,GABRA6,GABRB2,HTR2C,SLC1A2,SON2B,KCNA6,CHRN3,SLC23A1,SLC26A5,SLC9C1,SCN1A,SLC16A11,KCNK3,KCNK10,KCNMB3,CACNB2,SLC34A1,SLC6A18,SLC22A2,SLC2A10,CNGA2,CALHM1,GRID1,P2RX7,SLC22A8,CLCN1,SCARA5,KCNK5,GRIN3A,SLC22A2,SLC9C2,CHRN2,KCNA10,CACNA1B,GRIN1,KCNB1,KCNE1L,SLC22A6,SCNN1D,SLC28A1,GRIN2A,SLC17A3,KCNJ1,CACNA11,FAM26D,SCN9A,SLC12A5,KCNK16,SLC4A10,SCN1B,PTPRC,HFE,GABRA2,KCNK9,TRPM1,SLC34A3,KCN2C,KCNJ16,GRIN2B,GRIA3                                                                                                                                                                                                                                                                                                                                                                                                                                                                                                                                                                                                                                                                                                                                                                                                                                                                                                                                              |
| GO:0051716 | cellular response to  | 192 | 6212 | 0,3  | 4,44E-27 | RIPK3,AQP8,AQP9,P2RX5,CD69,GPR63,TREM1,OR7C1,KCNA5,RAMP2,CHRM3,DCLK1,SIT1,GPR133,KCNH2,HPN,SORCS1,IL1RL2,CACNA1C,GABRA6,GABRB2,HTR2C,SLC1A2,MS4A2,CD226,MCHR2,GPR15,HTF6,CHRN3,LILRA4,FGFR4,LHCGR,F2RL2,CLEC1B,OR4K2,OR10A5,GALR1,CD3D,OR51B5,C3AR1,OR10V1,OR52K1,OR911,MUC17,OR1B1,OR7G2,OR8U1,OR6Y1,SLAMF1,GPR151,GPRC6A,CD34,OR10H5,OR2Y1,CSPG4,KCNK10,EDNRA,HTF1A,OR7A5,MC5R,GPR62,OR4K13,OR4K5,GHRHR,SLC34A1,OR4S1,OR6B3,OR5AK2,OR52N5,HTF1F,OR8H1,OR8K5,TMEM108,OR10G4,OR52D1,TAS2R60,OR2T10,GRID1,RTN4RL1,P2RX7,OR1G1,NPY2R,OR6P1,GRK1,OR5D18,OPRL1,PLAUR,KIR2DL4,OR13H1,NEO1,NCR3,ERBB4,OR2AG2,ADRB3,OR6N2,SCARA5,OR5H2,RET,TNFRSF14,OR2T6,OR52R1,PTGER3,CCRL2,OR8D1,OR5AC2,OR6K2,OR2M2,RXRG,OR5B21,NTRK3,GRIN3A,LRRTM3,OR2T5,OR2T1,ESRRG,GA33,DDR2,FCGR3A,CD244,OR6K3,OR10R2,CHRN2B,ROS1,FCGR1B,CD2,HTR1B,LPPR4,GRIN1,KCNB1,AGTR2,IRS4,EPHA10,OR1N2,MUSK,CNR2,OR13C5,OR10G9,OR4D1,GABBR1,OR5V1,OR2J2,OXER1,TNFRSF4,MUC3A,OR6C65,OR6C75,OR10A4,OR51B4,NPSR1,SIRPB1,OR5K1,ACVRL1,EPHA6,TAS2R31,KIR3DL1,OR6C4,GRM2,GRIN2A,CSF2RB,VSTM2A,CACNA11,NRXN1,OR2A14,OR1C1,OR2A25,TAS2R41,CD8A,CALCRL,OR5K2,CXCR6,SCN1B,OR5H14,ESR1,CRACR2A,PTPRC,HFE,TMEM8C,CASR,GABRA2,ESRRB,TRPM1,KLRK1,OR13C2,TARM1,GPR19,TAS2R38,KCN2C,MRC1,OR1D5,ZP2,OR8G1,GRIN2B,GPR1,ANTXR1,GRIA3,PRLR                                                                                                                                                                                                      |
| GO:0055085 | transmembrane trar    | 81  | 1235 | 0,63 | 3,75E-26 | CLIC5,AQP8,AQP9,P2RX5,SLC5A9,SLC25A2,KCNJ8,SLC17A1,KCNA5,KCNH2,SLC4A1,HPN,KCNQ4,SLC17A6,CACNA1C,SLC47A1,GABRA6,GABRB2,HTR2C,SLC1A2,SON2B,KCNA6,CHRN3,SLC23A1,SLC26A5,SLC9C1,SCN1A,SLC16A11,KCNK3,KCNK10,EDNRA,KCNMB3,CACNB2,SLC34A1,SLC6A18,SLC2A10,CNGA2,CALHM1,GRID1,P2RX7,SLC22A8,CLCN1,SCARA5,KCNK5,GRIN3A,SLC22A2,SLC9C2,CHRN2,KCNA10,CACNA1B,GRIN1,KCNB1,KCNE1L,SLC46A2,SLC22A6,SCNN1D,SLC28A1,GRIN2A,SLC17A3,KCNJ1,CACNA11,FAM26D,SCN9A,SLC12A5,SLC14A1,KCNK16,SLC4A10,SCN1B,SLC23A3,PTPRC,SLC25A48,HFE,GABRA2,KCNK9,TRPM1,SLC34A3,KCN2C,KCNJ16,GRIN2B,GRIA3                                                                                                                                                                                                                                                                                                                                                                                                                                                                                                                                                                                                                                                                                                                                                                                                                                                                                                               |
| GO:0098655 | cation transmembra    | 63  | 720  | 0,75 | 6,15E-26 | P2RX5,SLC5A9,SLC25A2,KCNJ8,SLC17A1,KCNA5,KCNH2,SLC4A1,HPN,KCNQ4,CACNA1C,SLC47A1,HTR2C,SLC1A2,SON2B,KCNA6,CHRN3,SLC23A1,SLC9C1,SCN1A,KCNK3,KCNK10,KCNMB3,CACNB2,SLC34A1,SLC6A18,SLC22A10,CNGA2,CALHM1,P2RX7,SCARA5,KCNK5,GRIN3A,SLC22A2,SLC9C2,CHRN2,KCNA10,CACNA1B,GRIN1,KCNB1,KCNE1L,SLC22A6,SCNN1D,SLC28A1,GRIN2A,SLC17A3,KCNJ1,CACNA11,FAM26D,SCN9A,SLC12A5,SLC4A10,SCN1B,PTPRC,HFE,KCNK9,TRPM1,SLC34A3,KCN2C,KCNJ16,GRIN2B,GRIA3                                                                                                                                                                                                                                                                                                                                                                                                                                                                                                                                                                                                                                                                                                                                                                                                                                                                                                                                                                                                                                              |
| GO:0006812 | cation transport      | 68  | 866  | 0,71 | 1,16E-25 | P2RX5,SLC5A9,SLC25A2,KCNJ8,SLC17A1,KCNA5,RAMP2,KCNH2,SLC4A1,HPN,KCNQ4,SLC17A6,CACNA1C,SLC47A1,HTR2C,SLC1A2,SON2B,KCNA6,CHRN3,SLC23A1,SLC9C1,SCN1A,KCNK3,KCNK10,KCNMB3,CACNB2,SLC34A1,SLC6A18,SLC22A10,CNGA2,CALHM1,P2RX7,SCARA5,KCNK5,GRIN3A,SLC22A2,SLC9C2,CHRN2,KCNA10,CACNA1B,GRIN1,KCNB1,KCNE1L,SLC22A6,SCNN1D,SLC28A1,GRIN2A,SLC17A3,KCNJ1,CACNA11,FAM26D,SCN9A,CALCRL,SLC12A5,KCNK16,SLC4A10,SCN1B,CRACR2A,PTPRC,HFE,CASR,KCNK9,TRPM1,SLC34A3,KCN2C,KCNJ16,GRIN2B,GRIA3                                                                                                                                                                                                                                                                                                                                                                                                                                                                                                                                                                                                                                                                                                                                                                                                                                                                                                                                                                                                     |
| GO:0006811 | ion transport         | 81  | 1292 | 0,61 | 5,66E-25 | CLIC5,AQP8,AQP9,P2RX5,SLC5A9,SLC25A2,KCNJ8,SLC17A1,KCNA5,RAMP2,KCNH2,SLC4A1,HPN,KCNQ4,SLC17A6,CACNA1C,SLC47A1,GABRA6,GABRB2,HTR2C,SLC1A2,SON2B,KCNA6,CHRN3,SLC23A1,SLC26A5,SLC9C1,SCN1A,SLC16A11,KCNK3,KCNK10,KCNMB3,CACNB2,SLC34A1,SLC6A18,SLC2A10,CNGA2,CALHM1,GRID1,P2RX7,SLC22A8,CLCN1,SCARA5,KCNK5,GRIN3A,SLC22A2,SLC9C2,CHRN2,KCNA10,CACNA1B,GRIN1,KCNB1,KCNE1L,SLC22A6,SCNN1D,SLC28A1,GRM2,GRIN2A,SLC17A3,KCNJ1,CACNA11,FAM26D,SCN9A,CALCRL,SLC12A5,KCNK16,SLC4A10,SCN1B,CRACR2A,PTPRC,HFE,CASR,GABRA2,KCNK9,TRPM1,SLC34A3,KCN2C,KCNJ16,GRIN2B,GRIA3                                                                                                                                                                                                                                                                                                                                                                                                                                                                                                                                                                                                                                                                                                                                                                                                                                                                                                                       |

|            |                       |     |       |      |          |                                                                                                                                                                                                                                                                                                                                                                                                                                                                                                                                                                                                                                                                                                                                                                                                                                                                                                                                                                                                                                                                                                                                                                                                                                                                                                                                                                                                                                                                                                                                                                                                |
|------------|-----------------------|-----|-------|------|----------|------------------------------------------------------------------------------------------------------------------------------------------------------------------------------------------------------------------------------------------------------------------------------------------------------------------------------------------------------------------------------------------------------------------------------------------------------------------------------------------------------------------------------------------------------------------------------------------------------------------------------------------------------------------------------------------------------------------------------------------------------------------------------------------------------------------------------------------------------------------------------------------------------------------------------------------------------------------------------------------------------------------------------------------------------------------------------------------------------------------------------------------------------------------------------------------------------------------------------------------------------------------------------------------------------------------------------------------------------------------------------------------------------------------------------------------------------------------------------------------------------------------------------------------------------------------------------------------------|
| GO:0030001 | metal ion transport   | 59  | 664   | 0,76 | 1,67E-24 | SLC5A9,KCNJ8,SLC17A1,KCNA5,RAMP2,KCNH2,SLC4A1,HPN,KCNQ4,SLC17A6,CACNA1C,HTR2C,SLC1A2,SCN2B,KCNA6,SLC23A1,SLC9C1,SCN11A,KCNE3,KCNK10,KCNMB3,CACNB2,SLC34A1,SLC6A18,CNGA2,CALHM1,P2RX7,SCARA5,KCNK5,GRIN3A,SLC9C2,CHRN2,KCNA10,CACNA1B,GRIN1,KCNB1,KCNE1L,SCNN1D,SLC28A1,GRIN2A,SLC17A3,KCNU1,CACNA11,SCN9A,CALCRL,SLC12A5,KCNK16,SLC4A10,SCN1B,CACR2A,PTPRC,HFE,CASR,KCNK9,TRPM1,SLC34A3,KCNC2,KCNJ16,GRIN2B                                                                                                                                                                                                                                                                                                                                                                                                                                                                                                                                                                                                                                                                                                                                                                                                                                                                                                                                                                                                                                                                                                                                                                                    |
| GO:0098660 | inorganic ion transp  | 60  | 707   | 0,74 | 5,24E-24 | CLIC5,SLC5A9,KCNJ8,SLC17A1,KCNA5,KCNH2,SLC4A1,HPN,KCNQ4,CACNA1C,SLC47A1,GABRA6,GABRB2,HTR2C,SLC1A2,SCN2B,KCNA6,SLC23A1,SLC26A5,SLC9C1,SCN11A,KCNE3,KCNK10,KCNMB3,CACNB2,SLC34A1,SLC6A18,CNGA2,CALHM1,P2RX7,CLCN1,SCARA5,KCNK5,GRIN3A,SLC9C2,KCNA10,CACNA1B,GRIN1,KCNB1,KCNE1L,SCNN1D,SLC28A1,GRIN2A,SLC17A3,KCNU1,CACNA11,SCN9A,SLC12A5,KCNK16,SLC4A10,SCN1B,PTPRC,HFE,GABRA2,KCNK9,TRPM1,SLC34A3,KCNC2,KCNJ16,GRIN2B                                                                                                                                                                                                                                                                                                                                                                                                                                                                                                                                                                                                                                                                                                                                                                                                                                                                                                                                                                                                                                                                                                                                                                          |
| GO:0098662 | inorganic cation tra  | 54  | 618   | 0,75 | 5,97E-22 | SLC5A9,KCNJ8,SLC17A1,KCNA5,KCNH2,SLC4A1,HPN,KCNQ4,CACNA1C,SLC47A1,HTR2C,SLC1A2,SCN2B,KCNA6,SLC23A1,SLC9C1,SCN11A,KCNE3,KCNK10,KCNMB3,CACNB2,SLC34A1,SLC6A18,CNGA2,CALHM1,P2RX7,SCARA5,KCNK5,GRIN3A,SLC9C2,KCNA10,CACNA1B,GRIN1,KCNB1,KCNE1L,SCNN1D,SLC28A1,GRIN2A,SLC17A3,KCNU1,CACNA11,SCN9A,SLC12A5,KCNK16,SLC4A10,SCN1B,PTPRC,HFE,KCNK9,TRPM1,SLC34A3,KCNC2,KCNJ16,GRIN2B                                                                                                                                                                                                                                                                                                                                                                                                                                                                                                                                                                                                                                                                                                                                                                                                                                                                                                                                                                                                                                                                                                                                                                                                                   |
| GO:0042221 | response to chemi     | 142 | 4153  | 0,35 | 6,79E-21 | AQP8,AQP9,P2RX5,CD69,SLC25A2,KCNJ8,OR7C1,KCNA5,RAMP2,CHRM3,KCNH2,HPN,SLC17A6,IL1RL2,SLC47A1,GABRB2,HTR2C,SLC1A2,SCN2B,CHRN3,FGFR4,LHCGR,OR4K2,OR10A5,OR51B5,C3AR1,OR10V1,OR52K1,OR9I1,SLC23A1,OR1B1,OR7G2,OR8U1,SLC26A5,OR6Y1,SCN11A,GPRC6A,OR10H5,OR2Y1,OR7A5,OR4K13,KCNMB3,OR4K5,GHRHR,SLC34A1,OR4S1,OR6B3,OR5AK2,OR52N5,OR8H1,OR8K5,TMEM108,OR10G4,OR52D1,OR2T10,CALHM1,RTN4RL1,P2RX7,OR1G1,OR6P1,OR5D18,OPRL1,SLC22A8,PLAUR,OR13H1,NEO1,ERBB4,OR2AG2,ADRB3,OR6N2,OR5H2,RET,TFNRSF14,OR2T6,OR52R1,CORL2,OR8D1,OR5AC2,OR6K2,OR2M2,RXRG,OR5B21,NTRK3,GRIN3A,LRRTM3,OR2T5,OR2T1,ESRRG,SLC22A2,OR6K3,OR10R2,CHRN2,FCGR1B,HTR1B,GRIN1,KCNB1,AGTR2,IRS4,OR1N2,CNR2,OR13C5,OR10G9,OR4D1,OR5V1,OR2J2,SLC22A6,TFNRSF4,OR6C65,OR6C75,OR10A4,OR51B4,OR5K1,ACVRL1,TAS2R31,OR6C4,GRIN2A,SLC17A3,CSF2RB,VSTM2A,NRXN1,OR2A14,OR1C1,OR2A25,SCN9A,CALCRL,SLC12A5,OR5K2,CXCR6,SCN1B,OR5H14,ESR1,HFE,CASR,ESRRB,OR13C2,TAS2R38,KCNC2,MRC1,OR1D5,OR8G1,GRIN2B,PRLR                                                                                                                                                                                                                                                                                                                                                                                                                                                                                                                                                                                                                                              |
| GO:0015672 | monovalent inorga     | 41  | 437   | 0,78 | 2,57E-17 | SLC5A9,KCNJ8,SLC17A1,KCNA5,KCNH2,SLC4A1,HPN,KCNQ4,SLC17A6,SLC47A1,SLC1A2,SCN2B,KCNA6,SLC23A1,SLC9C1,SCN11A,KCNE3,KCNK10,KCNMB3,SLC34A1,SLC6A18,CNGA2,KCNK5,SLC9C2,KCNA10,KCNB1,KCNE1L,SCNN1D,SLC28A1,SLC17A3,KCNU1,CACNA11,SCN9A,SLC12A5,KCNK16,SLC4A10,SCN1B,KCNK9,SLC34A3,KCNC2,KCNJ16                                                                                                                                                                                                                                                                                                                                                                                                                                                                                                                                                                                                                                                                                                                                                                                                                                                                                                                                                                                                                                                                                                                                                                                                                                                                                                       |
| GO:0032501 | multicellular organis | 175 | 6507  | 0,24 | 3,01E-16 | TRO,CLIC5,RIPK3,AQP9,P2RX5,PCDH6,KCNJ8,OR7C1,KCNA5,RAMP2,CHRM3,DCLK1,KCNH2,HPN,KCNO4,CACNA1C,GABRB2,HTR2C,SLC1A2,SCN2B,CD226,HTR6,CHRN3,LHCGR,F2RL2,CLEC1B,OR4K2,OR10A5,CD3D,OR51B5,C3AR1,OR10V1,OR52K1,OR9I1,SLC23A1,OR1B1,OR7G2,OR8U1,SLC26A5,OR6Y1,SLC9C1,SCN11A,CD34,KCNE3,OR10H5,OR2Y1,CSPG4,KCNK10,EDNRA,HTR1A,OR7A5,OR4K13,KCNMB3,OR4K5,CACNB2,GHRHR,SLC34A1,OR4S1,OR6B3,OR5AK2,OR52N5,SLC22A2,OR8H1,OR8K5,TMEM108,OR10G4,OR52D1,TAS2R60,CNGA2,OR2T10,CALHM1,GRID1,RTN4RL1,P2RX7,OR1G1,NPY2R,IGDCC3,OR6P1,GRK1,OR5D18,OPRL1,PLAUR,CLCN1,OR13H1,NEO1,ERBB4,OR2AG2,ADRB3,OR6N2,OR5H2,RET,TFNRSF14,OR2T6,OR52R1,PTGER3,OR8D1,OR5AC2,KCNK5,OR6K2,OR2M2,OR5B21,NTRK3,GRIN3A,OR2T5,OR2T1,DDR2,OR6K3,OR10R2,CHRN2,ROS1,HTR1B,LPPR4,ENTPD1,CACNA1B,GRIN1,AGTR2,KCNE1L,OR1N2,SLC46A2,MUSK,CNR2,OR13C5,OR10G9,OR4D1,OR5V1,OR2J2,SLC22A6,SCN1D,TFNRSF4,OR6C65,OR6C75,OR10A4,OR51B4,OR5K1,STAB2,ACVRL1,TAS2R31,OR6C4,GRIN2A,SLC17A3,CSF2RB,CACNA11,NRXN1,OR2A14,OR1C1,OR2A25,TAS2R41,SCN9A,CD8A,CALCRL,SLC12A5,SLC4A10,OR5K2,SCN1B,OR5H14,ESR1,PTPRC,HFE,TMEM8C,CASR,ESRRB,MPZ,PCDH5,TRPM1,OR13C2,TAS2R38,KCNC2,OR1D5,SEMA6B,OR8G1,GRIN2B,GRIA3,PRLR,ADAM29                                                                                                                                                                                                                                                                                                                                                                                                                                         |
| GO:0042391 | regulation of membr   | 37  | 408   | 0,77 | 4,34E-15 | P2RX5,KCNJ8,KCNA5,KCNH2,CACNA1C,SCN2B,CHRN3,SLC26A5,SCN11A,KCNE3,KCNK10,KCNMB3,CACNB2,SLC34A1,TMEM108,CNGA2,GRID1,P2RX7,NPY2R,CLCN1,KCNK5,GRIN3A,CHRN2,CACNA1B,GRIN1,KCNB1,KCNE1L,CNR2,GRIN2A,CACNA11,NRXN1,SCN9A,KCNK16,SCN1B,KCNK9,GRIN2B,GRIA3                                                                                                                                                                                                                                                                                                                                                                                                                                                                                                                                                                                                                                                                                                                                                                                                                                                                                                                                                                                                                                                                                                                                                                                                                                                                                                                                              |
| GO:0043269 | regulation of ion tra | 43  | 618   | 0,65 | 7,91E-14 | CLIC5,P2RX5,KCNJ8,KCNA5,KCNH2,KCNO4,CACNA1C,SCN2B,KCNA6,SLC26A5,SCN11A,KCNE3,KCNK10,HTR1A,CACNB2,SLC34A1,CALHM1,P2RX7,NPY2R,OPRL1,CLCN1,KCNK5,CHRN2,ROS1,KCNA10,HTR1B,CACNA1B,GRIN1,KCNB1,AGTR2,KCNE1L,NPSR1,KCNU1,CACNA11,NRXN1,SCN9A,KCNK16,SCN1B,CACR2A,HFE,CASR,KCNC2,KCNJ16                                                                                                                                                                                                                                                                                                                                                                                                                                                                                                                                                                                                                                                                                                                                                                                                                                                                                                                                                                                                                                                                                                                                                                                                                                                                                                               |
| GO:0065007 | biological regulator  | 243 | 11740 | 0,13 | 3,52E-12 | CLIC5,RIPK3,AQP9,P2RX5,CD69,GPR63,KCNJ8,TREM1,OR7C1,KCNA5,RAMP2,CHRM3,DCLK1,SIT1,GP133,KCNH2,SLC4A1,HPN,KCNQ4,SORCS1,IL1RL2,CACNA1C,GABRA6,GABRB2,LRRTM2,HTR2C,SLC1A2,MS4A2,SCN2B,CD226,KCNA6,MCHR2,GPR15,HTR6,CHRN3,LILRA4,FGFR4,LHCGR,F2RL2,CLEC1B,OR4K2,OR10A5,GALR1,CD3D,OR51B5,C3AR1,OR10V1,OR52K1,OR9I1,MUC17,TM4SF20,OR1B1,OR7G2,OR8U1,SLC26A5,OR6Y1,SLAMF1,SLC9C1,SCN11A,GPR151,GPRC6A,CD34,KCNE3,OR10H5,OR2Y1,CSPG4,KCNK10,EDNRA,HTR1A,OR7A5,MCSR,GPR62,OR4K13,KCNMB3,OR4K5,CACNB2,GHRHR,SLC34A1,OR4S1,OR6B3,OR5AK2,OR52N5,HTR1F,SLC22A2,OR8H1,OR8K5,TMEM108,OR10G4,OR52D1,TAS2R60,CNGA2,OR2T10,CALHM1,GRID1,RTN4RL1,P2RX7,OR1G1,TMIGD1,NPY2R,OR6P1,GRK1,OR5D18,OPRL1,PLAUR,KIR2DL4,CLCN1,OR13H1,NEO1,NCR3,ERBB4,TREM4,OR2AG2,ADRB3,OR6N2,SCARA5,OR5H2,RET,TFNRSF14,OR2T6,OR52R1,PTGER3,CORL2,OR8D1,OR5AC2,KCNK5,OR6K2,RXRG,KCTD8,OR5B21,NTRK3,GRIN3A,LRRTM3,OR2T5,OR2T1,ESRRG,SLC22A2,SLC9C2,GPA33,DDR2,FCGR3A,CD244,OR6K3,OR10R2,CHRN2,ROS1,FCGR1B,CD2,KCNA10,HTR1B,LPPR4,ENTPD1,CACNA1B,GRIN1,KCNB1,AGTR2,KCNE1L,IRS4,EPHA10,OR1N2,SLC46A2,MUSK,CNR2,OR13C5,OR10G9,OR4D1,SYNDIG1,GABBR1,OR5V1,OR2J2,OXER1,TFNRSF4,MUC3A,OR6C65,OR6C75,OR10A4,NPSR1,SIRPB1,OR5K1,ACVRL1,EPHA6,TAS2R31,KIR3DL1,LAIR1,OR6C4,GRM2,GRIN2A,KCNU1,SLITRK6,JAM2,GP5,CSF2RB,VSTM2A,CACNA11,NRXN1,OR2A14,OR1C1,OR2A25,TAS2R41,SCN9A,CD8A,CALCRL,SLC12A5,KCNK16,SLC4A10,OR5K2,CXCR6,SCN1B,OR5H14,ESR1,TMEM132D,CACR2A,PTPRC,MALRD1,HFE,TMEM176A,TIGIT,CASR,CD200,GABRA2,ESRRB,KCNK9,MPZ,TRPM1,KLRC1,OR13C2,TARMI1,GPR19,SLC34A3,TAS2R38,KCNC2,MRC1,OR1D5,ZP2,KCNJ16,OR8G1,GRIN2B,GPR1,ANTXR1,GRIA3,PTPRQ,PRLR |
| GO:0007268 | chemical synaptic tr  | 32  | 402   | 0,71 | 1,71E-11 | P2RX5,PCDH6,CHRM3,GABRB2,HTR2C,SLC1A2,SCN2B,HTR6,CHRN3,KCNMB3,CACNB2,HTR1F,GRID1,P2RX7,NPY2R,OPRL1,GRIN3A,SLC22A2,CHRN2,HTR1B,CACNA1B,GRIN1,GRM2,GRIN2A,NRXN1,SLC12A5,SCN1B,MPZ,GPR19,GRIN2B,GPR1,GRIA3                                                                                                                                                                                                                                                                                                                                                                                                                                                                                                                                                                                                                                                                                                                                                                                                                                                                                                                                                                                                                                                                                                                                                                                                                                                                                                                                                                                        |
| GO:0071805 | potassium ion trans   | 22  | 169   | 0,93 | 1,71E-11 | KCNJ8,KCNA5,KCNH2,HPN,KCNQ4,KCNA6,SLC9C1,KCNE3,KCNK10,KCNMB3,CNGA2,KCNK5,SLC9C2,KCNA10,KCNB1,KCNE1L,KCNU1,SLC12A5,KCNK16,KCNK9,KCNC2,KCNJ16                                                                                                                                                                                                                                                                                                                                                                                                                                                                                                                                                                                                                                                                                                                                                                                                                                                                                                                                                                                                                                                                                                                                                                                                                                                                                                                                                                                                                                                    |
| GO:0034765 | regulation of ion tra | 33  | 434   | 0,69 | 2,09E-11 | CLIC5,KCNJ8,KCNA5,KCNH2,KCNO4,CACNA1C,SCN2B,KCNA6,SLC26A5,SCN11A,KCNE3,KCNK10,CACNB2,SLC34A1,CALHM1,P2RX7,OPRL1,CLCN1,KCNK5,KCNA10,CACNA1B,KCNB1,KCNE1L,NPSR1,KCNU1,CACNA11,NRXN1,SCN9A,KCNK16,SCN1B,CACR2A,KCNC2,KCNJ16                                                                                                                                                                                                                                                                                                                                                                                                                                                                                                                                                                                                                                                                                                                                                                                                                                                                                                                                                                                                                                                                                                                                                                                                                                                                                                                                                                       |
| GO:0007187 | G protein-coupled r   | 23  | 206   | 0,86 | 7,66E-11 | RAMP2,CHRM3,GPR133,HTR6,LHCGR,GALR1,EDNRA,HTR1A,MCSR,GHRHR,HTR1F,NPY2R,OPRL1,ADRB3,HTR1B,AGTR2,CNR2,GABBR1,OXER1,GRM2,CALCRL,CASR,GPR1                                                                                                                                                                                                                                                                                                                                                                                                                                                                                                                                                                                                                                                                                                                                                                                                                                                                                                                                                                                                                                                                                                                                                                                                                                                                                                                                                                                                                                                         |
| GO:0034762 | regulation of transm  | 35  | 524   | 0,64 | 1,10E-10 | CLIC5,KCNJ8,KCNA5,KCNH2,KCNO4,CACNA1C,SLC1A2,SCN2B,KCNA6,SLC26A5,SCN11A,KCNE3,KCNK10,EDNRA,CACNB2,SLC34A1,CALHM1,P2RX7,OPRL1,CLCN1,KCNK5,KCNA10,CACNA1B,KCNB1,KCNE1L,NPSR1,KCNU1,CACNA11,NRXN1,SCN9A,KCNK16,SCN1B,CACR2A,KCNC2,KCNJ16                                                                                                                                                                                                                                                                                                                                                                                                                                                                                                                                                                                                                                                                                                                                                                                                                                                                                                                                                                                                                                                                                                                                                                                                                                                                                                                                                          |
| GO:0050789 | regulation of biologi | 229 | 11116 | 0,13 | 4,92E-10 | CLIC5,RIPK3,P2RX5,CD69,GPR63,KCNJ8,TREM1,OR7C1,KCNA5,RAMP2,CHRM3,DCLK1,SIT1,GPR133,KCNH2,HPN,KCNQ4,SORCS1,IL1RL2,CACNA1C,GABRA6,GABRB2,LRRTM2,HTR2C,SLC1A2,MS4A2,SCN2B,CD226,KCNA6,MCHR2,GPR15,HTR6,CHRN3,LILRA4,FGFR4,LHCGR,F2RL2,CLEC1B,OR4K2,OR10A5,GALR1,CD3D,OR51B5,C3AR1,OR10V1,OR52K1,OR9I1,MUC17,TM4SF20,OR1B1,OR7G2,OR8U1,SLC26A5,OR6Y1,SLAMF1,SCN11A,GPR151,GPRC6A,CD34,KCNE3,OR10H5,OR2Y1,CSPG4,KCNK10,EDNRA,HTR1A,OR7A5,MCSR,GPR62,OR4K13,OR4K5,CACNB2,GHRHR,SLC34A1,OR4S1,OR6B3,OR5AK2,OR52N5,HTR1F,SLC22A2,OR8H1,OR8K5,TMEM108,OR10G4,OR52D1,TAS2R60,OR2T10,CALHM1,GRID1,RTN4RL1,P2RX7,OR1G1,TMIGD1,NPY2R,OR6P1,GRK1,OR5D18,OPRL1,PLAUR,KIR2DL4,CLCN1,OR13H1,NEO1,NCR3,ERBB4,TREM4,OR2AG2,ADRB3,OR6N2,OR5H2,RET,TFNRSF14,OR2T6,OR52R1,PTGER3,CORL2,OR8D1,OR5AC2,KCNK5,OR6K2,RXRG,KCTD8,OR5B21,NTRK3,GRIN3A,LRRTM3,OR2T5,OR2T1,ESRRG,GPA33,DDR2,FCGR3A,CD244,OR6K3,OR10R2,CHRN2,ROS1,FCGR1B,CD2,KCNA10,HTR1B,LPPR4,CACNA1B,GRIN1,KCNB1,AGTR2,KCNE1L,IRS4,EPHA10,OR1N2,SLC46A2,MUSK,CNR2,OR13C5,OR10G9,OR4D1,SYNDIG1,GABBR1,OR5V1,OR2J2,OXER1,TFNRSF4,MUC3A,OR6C65,OR6C75,OR10A4,NPSR1,SIRPB1,OR5K1,ACVRL1,EPHA6,TAS2R31,KIR3DL1,LAIR1,OR6C4,GRM2,GRIN2A,KCNU1,SLITRK6,JAM2,GP5,CSF2RB,VSTM2A,CACNA11,NRXN1,OR2A14,OR1C1,OR2A25,TAS2R41,SCN9A,CD8A,CALCRL,SLC12A5,KCNK16,SLC4A10,OR5K2,CXCR6,SCN1B,OR5H14,ESR1,TMEM132D,CACR2A,PTPRC,MALRD1,HFE,TMEM176A,TIGIT,CASR,CD200,GABRA2,ESRRB,KCNK9,MPZ,TRPM1,KLRC1,OR13C2,TARMI1,GPR19,SLC34A3,TAS2R38,KCNC2,MRC1,OR1D5,ZP2,KCNJ16,OR8G1,GRIN2B,GPR1,ANTXR1,GRIA3,PTPRQ,PRLR                                                             |

|            |                        |     |       |      |          |                                                                                                                                                                                                                                                                                                                                                                                                                                                                                                                                                                                                                                                                                                                                                                                                                                                                                                                                                                                                                                                                                                                                                                                                                                                                                                                                                                                 |
|------------|------------------------|-----|-------|------|----------|---------------------------------------------------------------------------------------------------------------------------------------------------------------------------------------------------------------------------------------------------------------------------------------------------------------------------------------------------------------------------------------------------------------------------------------------------------------------------------------------------------------------------------------------------------------------------------------------------------------------------------------------------------------------------------------------------------------------------------------------------------------------------------------------------------------------------------------------------------------------------------------------------------------------------------------------------------------------------------------------------------------------------------------------------------------------------------------------------------------------------------------------------------------------------------------------------------------------------------------------------------------------------------------------------------------------------------------------------------------------------------|
| GO:0035725 | sodium ion transme     | 19  | 160   | 0,89 | 2,72E-09 | SLC5A9,SLC17A1,SLC4A1,SLC1A2,SCN2B,SLC23A1,SLC9C1,SCN11A,SLC34A1,SLC6A18,SLC9C2,SCN10,SLC28A1,SLC17A3,CACNA11,SCN9A,SLC4A10,SCN1B,SLC34A3                                                                                                                                                                                                                                                                                                                                                                                                                                                                                                                                                                                                                                                                                                                                                                                                                                                                                                                                                                                                                                                                                                                                                                                                                                       |
| GO:0001508 | action potential       | 16  | 104   | 1    | 3,07E-09 | KCNJ8,KCNA5,KCNH2,CACNA1C,SCN2B,SCN11A,KCNMB3,CACNB2,CLCN1,CHRN2B,CACNA1B,KCNB1,KCNE1L,CACNA11,SCN9A,SCN1B                                                                                                                                                                                                                                                                                                                                                                                                                                                                                                                                                                                                                                                                                                                                                                                                                                                                                                                                                                                                                                                                                                                                                                                                                                                                      |
| GO:0006814 | sodium ion transpor    | 20  | 189   | 0,84 | 5,20E-09 | SLC5A9,SLC17A1,SLC4A1,SLC17A6,SLC1A2,SCN2B,SLC23A1,SLC9C1,SCN11A,SLC34A1,SLC6A18,SLC9C2,SCN10,SLC28A1,SLC17A3,CACNA11,SCN9A,SLC4A10,SCN1B,SLC34A3                                                                                                                                                                                                                                                                                                                                                                                                                                                                                                                                                                                                                                                                                                                                                                                                                                                                                                                                                                                                                                                                                                                                                                                                                               |
| GO:0007188 | adenylate cyclase-n    | 19  | 183   | 0,83 | 2,06E-08 | RAMP2,CHRM3,GPR133,LHCGR,GALR1,EDNRA,HTR1A,MCSR,GHRRH,HTR1F,NPY2R,OPRL1,ADRB3,HTR1B,GABBR1,OXER1,GRM2,CALCRL,CASR                                                                                                                                                                                                                                                                                                                                                                                                                                                                                                                                                                                                                                                                                                                                                                                                                                                                                                                                                                                                                                                                                                                                                                                                                                                               |
| GO:0098656 | anion transmembra      | 25  | 353   | 0,66 | 5,85E-08 | CLIC5,AQP9,SLC25A2,SLC17A1,SLC4A1,SLC17A6,GABRA6,GABRB2,SLC1A2,SLC23A1,SLC26A5,SLC16A11,SLC34A1,SLC6A18,SLC2A2,SLC22A10,SLC22A8,CLCN1,SLC22A2,SLC22A6,SLC17A3,SLC12A5,SLC4A10,GABRA2,SLC34A3                                                                                                                                                                                                                                                                                                                                                                                                                                                                                                                                                                                                                                                                                                                                                                                                                                                                                                                                                                                                                                                                                                                                                                                    |
| GO:0006810 | transport              | 110 | 4130  | 0,24 | 7,22E-08 | CLIC5,AQP9,AQP9,CEACAM4,P2RX5,SLC5A9,SLC25A2,KCNJ8,SLC17A1,KCNA5,RAMP2,CHRM3,DCLK1,KCNH2,SLC4A1,HPN,KCNQ4,SLC17A6,CACNA1C,SLC47A1,GABRA6,GABRB2,HTR2C,SLC1A2,SCN2B,KCNA6,CHRN3B,TMPRSS5,C3AR1,SLC23A1,SLC26A5,SLAMF1,SLC9C1,SCN11A,SLC16A11,KCNE3,KCNK10,EDNRA,KCNMB3,CACNB2,GHRRH,SLC34A1,SLC6A18,SLC2A2,TMEM108,SLC22A10,CNGA2,CALHM1,GRID1,P2RX7,NPY2R,SLC22A8,PLAUR,CLCN1,ERBB4,SCARA5,KCNK5,GRIN3A,SLC22A2,SLC9C2,FCGR3A,CHRN2B,FCGR1B,KCNA10,HTR1B,CACNA1B,GRIN1,KCNB1,AGTR2,KCNE1L,SLC46A2,SYNDIG1,SLC22A6,SCN11D,SIRPB1,STAB2,ESYT3,LAIR1,SLC28A1,GRM2,GRIN2A,SLC17A3,KCNU1,CACNA11,NRXN1,FAM26D,SCN9A,CALCRL,SLC12A5,SLC14A1,KCNK16,SLC4A10,SCN1B,SLC23A3,CRACR2A,PTPRC,SLC25A48,HFE,CASR,GABRA2,KCNK9,TRPM1,TARM1,SLC34A3,KCNC2,MRC1,KCNJ16,GRIN2B,GRIA3,PRLR                                                                                                                                                                                                                                                                                                                                                                                                                                                                                                                                                                                                         |
| GO:0050801 | ion homeostasis        | 35  | 708   | 0,51 | 2,12E-07 | P2RX5,KCNA5,KCNH2,SLC4A1,CACNA1C,HTR2C,SCN2B,FGFR4,F2RL2,GALR1,C3AR1,SLC26A5,SLC9C1,EDNRA,SLC34A1,P2RX7,NPY2R,OPRL1,NEO1,SCARA5,SLC9C2,GRIN1,AGTR2,NPSR1,GRIN2A,SLC12A5,SLC4A10,SCN1B,ESR1,PTPRC,HFE,CASR,TRPM1,SLC34A3,GRIN2B                                                                                                                                                                                                                                                                                                                                                                                                                                                                                                                                                                                                                                                                                                                                                                                                                                                                                                                                                                                                                                                                                                                                                  |
| GO:0098771 | inorganic ion home     | 33  | 643   | 0,52 | 2,53E-07 | P2RX5,KCNA5,KCNH2,SLC4A1,CACNA1C,HTR2C,FGFR4,F2RL2,GALR1,C3AR1,SLC26A5,SLC9C1,EDNRA,SLC34A1,P2RX7,NPY2R,OPRL1,NEO1,SCARA5,SLC9C2,GRIN1,AGTR2,NPSR1,GRIN2A,SLC12A5,SLC4A10,ESR1,PTPRC,HFE,CASR,TRPM1,SLC34A3,GRIN2B                                                                                                                                                                                                                                                                                                                                                                                                                                                                                                                                                                                                                                                                                                                                                                                                                                                                                                                                                                                                                                                                                                                                                              |
| GO:0065008 | regulation of biologi  | 96  | 3559  | 0,24 | 7,62E-07 | RIPK3,AQP9,P2RX5,KCNJ8,KCNA5,RAMP2,CHRM3,SIT1,KCNH2,SLC4A1,HPN,CACNA1C,LRRTM2,HTR2C,SLC1A2,SCN2B,CHRN3B,FGFR4,F2RL2,OLEC1B,GALR1,C3AR1,MUC17,SLC26A5,SLC9C1,SCN11A,C,D34,KCNE3,KCNK10,EDNRA,HTR1A,KCNMB3,CACNB2,GHRRH,SLC34A1,SLC2A2,TMEM108,CNGA2,GRID1,P2RX7,TMIGD1,NPY2R,OPRL1,PLAUR,CLCN1,NEO1,ERBB4,ADRB3,SCARA5,RET,PTGER3,KCNK5,NTRK3,GRIN3A,LRRTM3,SLC22A2,SLC9C2,CHRN2B,HTR1B,ENTPD1,CACNA1B,GRIN1,KCNB1,AGTR2,KCNE1L,SLC46A2,MUSK,CNR2,SYNDIG1,NPSR1,ACVRL1,GRIN2A,SLITRK6,GPS,VSTM2A,CACNA11,NRXN1,SCN9A,SLC12A5,KCNK16,SLC4A10,SCN1B,ESR1,PTPRC,MALRD1,HFE,CASR,GABRA2,ESRRB,KCNK9,TRPM1,SLC34A3,KCNC2,GRIN2B,GRIA3,PRLR                                                                                                                                                                                                                                                                                                                                                                                                                                                                                                                                                                                                                                                                                                                                            |
| GO:0050794 | regulation of cellula  | 210 | 10484 | 0,11 | 8,87E-07 | RIPK3,P2RX5,CD69,GPR63,TREM1,OR7C1,KCNA5,RAMP2,CHRM3,DCLK1,SIT1,GPR133,KCNH2,HPN,SORCS1,IL1RL2,CACNA1C,GABRA6,GABRB2,LRRTM2,HTR2C,MS4A2,SCN2B,CD226,MCHR2,GPR115,HTR6,CHRN3B,LILRA4,FGFR4,LHCGR,F2RL2,OLEC1B,OR4K2,OR10A5,GALR1,CD3D,OR51B5,C3AR1,OR10V1,OR52K1,OR9I1,MUC17,TM4SF20,OR1B1,OR7G2,OR8U1,SLC26A5,OR6Y1,SLAMF1,GPR151,GPR4C6,CD34,KCNE3,OR10H5,OR2Y1,CSPG4,KCNK10,EDNRA,HTR1A,OR7A5,MCSR,GPR62,OR4K13,OPRAC5,GHHRH,OR4S1,OR6B3,OR5AK2,OR52N5,HTR1F,SLC2A2,OR8H1,OR8K5,TMEM108,OR10G4,OR52D1,TAS2R60,ORT10,GRID1,RTN4RL1,P2RX7,OR1G1,TMIGD1,NPY2R,OR6P1,GRK1,OR5D1,OPRL1,PLAUR,KIR2DL4,OR13H1,NEO1,NCR3,ERBB4,TREML4,OR2AG2,ADRB3,OR6N2,OR5H2,RET,TNFRSF14,OR2T6,OR52R1,PTGER3,CCL2,OR8D1,OR5AC2,OR6K2,OR2M2,RXRG,KCTD8,OR5B21,NTRK3,GRIN3A,LRRTM3,OR2T5,OR2T1,ESRRG,GPA33,DDR2,FCGR3A,CD244,OR6K3,OR10R2,CHRN2B,ROS1,FCGR1B,CD2,HTR1B,LPPRA,GRIN1,KCNB1,AGTR2,KCNE1L,IRS4,EPHA10,OR1N2,SLC46A2,MUSK,CNR2,OR13C5,OR10G9,OR4D1,SYNDIG1,GABBR1,OR5V1,OR2J2,OXER1,TNFRSF4,MUC3A,OR6C65,OR6C75,OR10A4,OR51B4,NPSR1,SIRPB1,OR5K1,ACVRL1,EPHA6,TAS2R31,KIR3DL1,OR6C4,GRM2,GRIN2A,SLITRK6,JAM2,CSF2RB,VSTM2A,CACNA11,NRXN1,OR2A14,OR1C1,OR2A25,TAS2R41,CD8A,CALCRL,OR5K2,CXCR6,SCN1B,OR5H14,ESR1,TMEM132D,PTPRC,MALRD1,HFE,TMEM176A,TIGIT,CASR,CD200,GABRA2,ESRRB,MPZ,TRPM1,KLRC1,OR13C2,TARM1,GPR19,TAS2R38,KCNC2,MRC1,OR1D5,ZP2,OR8G1,GRIN2B,GPR1,ANTXR1,GRIA3,PTPRQ,PRLR |
| GO:0051899 | membrane depolari      | 11  | 64    | 1,05 | 1,04E-06 | KCNH2,CACNA1C,SCN2B,SCN11A,CACNB2,P2RX7,CHRN2B,CACNA1B,CACNA11,SCN9A,SCN1B                                                                                                                                                                                                                                                                                                                                                                                                                                                                                                                                                                                                                                                                                                                                                                                                                                                                                                                                                                                                                                                                                                                                                                                                                                                                                                      |
| GO:0006873 | cellular ion homeos    | 30  | 584   | 0,52 | 1,20E-06 | P2RX5,KCNA5,SLC4A1,CACNA1C,HTR2C,F2RL2,GALR1,C3AR1,SLC26A5,SLC9C1,EDNRA,SLC34A1,P2RX7,NPY2R,OPRL1,SCARA5,SLC9C2,GRIN1,AGTR2,NPSR1,GRIN2A,SLC12A5,SLC4A10,ESR1,PTPRC,HFE,CASR,TRPM1,SLC34A3,GRIN2B                                                                                                                                                                                                                                                                                                                                                                                                                                                                                                                                                                                                                                                                                                                                                                                                                                                                                                                                                                                                                                                                                                                                                                               |
| GO:0015698 | inorganic anion tran   | 16  | 167   | 0,79 | 1,25E-06 | CLIC5,SLC17A1,SLC4A1,GABRA6,GABRB2,SLC26A5,SLC34A1,SLC22A10,SLC22A8,CLCN1,SLC22A6,SLC17A3,SLC12A5,SLC4A10,GABRA2,SLC34A3                                                                                                                                                                                                                                                                                                                                                                                                                                                                                                                                                                                                                                                                                                                                                                                                                                                                                                                                                                                                                                                                                                                                                                                                                                                        |
| GO:0006820 | anion transport        | 28  | 524   | 0,54 | 1,61E-06 | CLIC5,AQP9,SLC25A2,SLC17A1,SLC4A1,SLC17A6,GABRA6,GABRB2,SLC1A2,SLC23A1,SLC26A5,SLC16A11,SLC34A1,SLC6A18,SLC2A2,SLC22A10,CALHM1,P2RX7,SLC22A8,CLCN1,SLC22A2,SLC22A6,GRM2,SLC17A3,SLC12A5,SLC4A10,GABRA2,SLC34A3                                                                                                                                                                                                                                                                                                                                                                                                                                                                                                                                                                                                                                                                                                                                                                                                                                                                                                                                                                                                                                                                                                                                                                  |
| GO:0055082 | cellular chemical ho   | 32  | 665   | 0,49 | 1,62E-06 | P2RX5,KCNA5,SLC4A1,CACNA1C,HTR2C,F2RL2,GALR1,C3AR1,SLC26A5,SLC9C1,EDNRA,GHRRH,SLC34A1,P2RX7,NPY2R,OPRL1,SCARA5,SLC9C2,GRIN1,KCNB1,AGTR2,NPSR1,GRIN2A,SLC12A5,SLC4A10,ESR1,PTPRC,HFE,CASR,TRPM1,SLC34A3,GRIN2B                                                                                                                                                                                                                                                                                                                                                                                                                                                                                                                                                                                                                                                                                                                                                                                                                                                                                                                                                                                                                                                                                                                                                                   |
| GO:0051179 | localization           | 125 | 5233  | 0,19 | 1,86E-06 | CLIC5,AQP9,AQP9,CEACAM4,P2RX5,SLC5A9,SLC25A2,KCNJ8,SLC17A1,TREM1,KCNA5,RAMP2,CHRM3,DCLK1,KCNH2,SLC4A1,HPN,KCNQ4,SLC17A6,CACNA1C,SLC47A1,GABRA6,GABRB2,HTR2C,SLC1A2,SCN2B,KCNA6,GPR15,HTF6,CHRN3B,FGFR4,TMPRSS5,C3AR1,SLC23A1,SLC26A5,SLAMF1,SLC9C1,SCN11A,CD34,SLC16A11,KCNE3,CSPG4,KCNK10,EDNRA,KCNMB3,CACNB2,GHRRH,SLC34A1,SLC6A18,SLC2A2,TMEM108,SLC22A10,CNGA2,CALHM1,GRID1,P2RX7,NPY2R,SLC22A8,PLAUR,CLCN1,ERBB4,SCARA5,RET,KCNK5,NTRK3,GRIN3A,SLC22A2,SLC9C2,FCGR3A,CD244,CHRN2B,FCGR1B,CD2,KCNA10,HTR1B,CACNA1B,GRIN1,KCNB1,AGTR2,KCNE1L,SLC46A2,MUSK,CNR2,SYNDIG1,SLC22A6,SCN11D,SIRPB1,STAB2,ACVRL1,ESYT3,LAIR1,SLC28A1,GRM2,GRIN2A,SLC17A3,KCNU1,JAM2,CACNA11,NRXN1,FAM26D,SCN9A,CALCRL,SLC12A5,SLC14A1,KCNK16,SLC4A10,SCN1B,ESR1,SLC23A3,CRACR2A,PTPRC,SLC25A48,HFE,CASR,GABRA2,KCNK9,TRPM1,TARM1,SLC34A3,KCNC2,MRC1,KCNJ16,GRIN2B,GRIA3,PRLR                                                                                                                                                                                                                                                                                                                                                                                                                                                                                                                        |
| GO:0035637 | multicellular organis  | 13  | 110   | 0,88 | 2,67E-06 | KCNA5,KCNH2,CACNA1C,SCN2B,SCN11A,KCNE3,KCNMB3,CACNB2,CLCN1,KCNE1L,CACNA11,SCN9A,SCN1B                                                                                                                                                                                                                                                                                                                                                                                                                                                                                                                                                                                                                                                                                                                                                                                                                                                                                                                                                                                                                                                                                                                                                                                                                                                                                           |
| GO:0086010 | membrane depolari      | 9   | 42    | 1,14 | 3,57E-06 | KCNH2,CACNA1C,SCN2B,SCN11A,CACNB2,CACNA1B,CACNA11,SCN9A,SCN1B                                                                                                                                                                                                                                                                                                                                                                                                                                                                                                                                                                                                                                                                                                                                                                                                                                                                                                                                                                                                                                                                                                                                                                                                                                                                                                                   |
| GO:0007215 | glutamate receptor     | 9   | 43    | 1,13 | 4,18E-06 | GRID1,GRIN3A,GRIN1,KCNB1,GRM2,GRIN2A,TRPM1,GRIN2B,GRIA3                                                                                                                                                                                                                                                                                                                                                                                                                                                                                                                                                                                                                                                                                                                                                                                                                                                                                                                                                                                                                                                                                                                                                                                                                                                                                                                         |
| GO:0006816 | calcium ion transpo    | 18  | 242   | 0,68 | 5,39E-06 | RAMP2,CACNA1C,HTR2C,CACNB2,CALHM1,P2RX7,GRIN3A,CHRN2B,CACNA1B,GRIN1,GRIN2A,CACNA11,CALCRL,CRACR2A,PTPRC,CASR,TRPM1,GRIN2B                                                                                                                                                                                                                                                                                                                                                                                                                                                                                                                                                                                                                                                                                                                                                                                                                                                                                                                                                                                                                                                                                                                                                                                                                                                       |
| GO:0048878 | chemical homeosta:     | 39  | 995   | 0,4  | 8,06E-06 | AQP9,P2RX5,KCNA5,KCNH2,SLC4A1,CACNA1C,HTR2C,SCN2B,FGFR4,F2RL2,GALR1,C3AR1,SLC26A5,SLC9C1,EDNRA,GHRRH,SLC34A1,P2RX7,NPY2R,OPRL1,NEO1,SCARA5,SLC9C2,GRIN1,KCNB1,AGTR2,NPSR1,GRIN2A,SLC12A5,SLC4A10,SCN1B,ESR1,PTPRC,MALRD1,HFE,CASR,TRPM1,SLC34A3,GRIN2B                                                                                                                                                                                                                                                                                                                                                                                                                                                                                                                                                                                                                                                                                                                                                                                                                                                                                                                                                                                                                                                                                                                          |
| GO:0007193 | adenylate cyclase-ir   | 11  | 85    | 0,92 | 1,17E-05 | CHRM3,EDNRA,HTR1A,HTR1F,NPY2R,OPRL1,HTR1B,GABBR1,OXER1,GRM2,CASR                                                                                                                                                                                                                                                                                                                                                                                                                                                                                                                                                                                                                                                                                                                                                                                                                                                                                                                                                                                                                                                                                                                                                                                                                                                                                                                |
| GO:0086002 | cardiac muscle cell    | 8   | 36    | 1,16 | 1,41E-05 | KCNJ8,KCNA5,KCNH2,CACNA1C,SCN2B,CACNB2,KCNE1L,SCN1B                                                                                                                                                                                                                                                                                                                                                                                                                                                                                                                                                                                                                                                                                                                                                                                                                                                                                                                                                                                                                                                                                                                                                                                                                                                                                                                             |
| GO:0055080 | cation homeostasis     | 29  | 629   | 0,48 | 1,52E-05 | P2RX5,KCNA5,KCNH2,SLC4A1,CACNA1C,HTR2C,F2RL2,GALR1,C3AR1,SLC26A5,SLC9C1,EDNRA,P2RX7,NPY2R,OPRL1,NEO1,SCARA5,SLC9C2,GRIN1,AGTR2,NPSR1,GRIN2A,SLC4A10,ESR1,PTPRC,HFE,CASR,TRPM1,GRIN2B                                                                                                                                                                                                                                                                                                                                                                                                                                                                                                                                                                                                                                                                                                                                                                                                                                                                                                                                                                                                                                                                                                                                                                                            |
| GO:0051049 | regulation of transp   | 55  | 1732  | 0,31 | 1,57E-05 | CLIC5,P2RX5,KCNJ8,KCNA5,KCNH2,KCNQ4,CACNA1C,LRRTM2,HTR2C,SLC1A2,SCN2B,KCNA6,GALR1,SLC26A5,SCN11A,CD34,KCNE3,KCNK10,EDNRA,HTR1A,CACNB2,GHRRH,SLC34A1,SLC2A2,CALHM1,P2RX7,NPY2R,OPRL1,CLCN1,PTGER3,KCNK5,CD244,CHRN2B,ROS1,CD2,KCNA10,HTR1B,CACNA1B,GRIN1,KCNB1,AGTR2,KCNE1L,TNFRSF4,NPSR1,KCNU1,CACNA11,NRXN1,SCN9A,KCNK16,SCN1B,CRACR2A,HFE,CASR,KCNC2,KCNJ16                                                                                                                                                                                                                                                                                                                                                                                                                                                                                                                                                                                                                                                                                                                                                                                                                                                                                                                                                                                                                   |
| GO:0086091 | regulation of heart r: | 8   | 37    | 1,15 | 1,61E-05 | KCNA5,KCNH2,CACNA1C,SCN2B,KCNE3,CACNB2,KCNE1L,SCN1B                                                                                                                                                                                                                                                                                                                                                                                                                                                                                                                                                                                                                                                                                                                                                                                                                                                                                                                                                                                                                                                                                                                                                                                                                                                                                                                             |
| GO:0007267 | cell-cell signaling    | 40  | 1073  | 0,38 | 1,76E-05 | P2RX5,PCDH8,KCNA5,CHRM3,CACNA1C,GABRB2,HTR2C,SLC1A2,SCN2B,HTF6,CHRN3B,CD34,KCNMB3,CACNB2,GHRRH,HTR1F,GRID1,P2RX7,NPY2R,OPRL1,ADRB3,GRIN3A,SLC22A2,CHRN2B,HTR1B,CACNA1B,GRIN1,AGTR2,KCNE1L,GRM2,GRIN2A,NRXN1,SLC12A5,SCN1B,MPZ,PCDH45,GPR19,GRIN2B,GPR1,GRIA3                                                                                                                                                                                                                                                                                                                                                                                                                                                                                                                                                                                                                                                                                                                                                                                                                                                                                                                                                                                                                                                                                                                    |
| GO:0019932 | second-messenger-      | 18  | 266   | 0,64 | 1,77E-05 | RAMP2,GPR133,CACNA1C,LHCGR,GALR1,GPRC6A,MCSR,GPR62,GHRRH,P2RX7,NPY2R,ADRB3,GRIN1,AGTR2,GRIN2A,CALCRL,KCNC2,GRIN2B                                                                                                                                                                                                                                                                                                                                                                                                                                                                                                                                                                                                                                                                                                                                                                                                                                                                                                                                                                                                                                                                                                                                                                                                                                                               |
| GO:0030003 | cellular cation home   | 27  | 570   | 0,49 | 2,20E-05 | P2RX5,KCNA5,SLC4A1,CACNA1C,HTR2C,F2RL2,GALR1,C3AR1,SLC26A5,SLC9C1,EDNRA,P2RX7,NPY2R,OPRL1,SCARA5,SLC9C2,GRIN1,AGTR2,NPSR1,GRIN2A,SLC4A10,ESR1,PTPRC,HFE,CASR,TRPM1,GRIN2B                                                                                                                                                                                                                                                                                                                                                                                                                                                                                                                                                                                                                                                                                                                                                                                                                                                                                                                                                                                                                                                                                                                                                                                                       |
| GO:0019725 | cellular homeostasi:   | 33  | 806   | 0,42 | 2,69E-05 | P2RX5,KCNA5,SLC4A1,CACNA1C,HTR2C,F2RL2,GALR1,C3AR1,MUC17,SLC26A5,SLC9C1,EDNRA,GHRRH,SLC34A1,P2RX7,NPY2R,OPRL1,SCARA5,SLC9C2,GRIN1,KCNB1,AGTR2,NPSR1,GRIN2A,SLC12A5,SLC4A10,ESR1,PTPRC,HFE,CASR,TRPM1,SLC34A3,GRIN2B                                                                                                                                                                                                                                                                                                                                                                                                                                                                                                                                                                                                                                                                                                                                                                                                                                                                                                                                                                                                                                                                                                                                                             |

|            |                                                              |      |      |      |          |                                                                                                                                                                                                                                                                                                                                                                                                                                                                                                |
|------------|--------------------------------------------------------------|------|------|------|----------|------------------------------------------------------------------------------------------------------------------------------------------------------------------------------------------------------------------------------------------------------------------------------------------------------------------------------------------------------------------------------------------------------------------------------------------------------------------------------------------------|
| GO:0008015 | blood circulation                                            | 21   | 373  | 0,56 | 3,13E-05 | KCNJ8, KCNA5, RAMP2, CHRM3, KCNH2, CACNA1C, SCN2B, C3AR1, CD34, EDNRA, HTR1A, CACNB2, OPR1L, ADRB3, HTR1B, CACNA1B, AGTR2, KCNE1L, ACVRL1, SCN1B, CASR                                                                                                                                                                                                                                                                                                                                         |
| GO:0060079 | excitatory postsynaptic positive regulation                  | 10   | 251  | 0,93 | 3,13E-05 | P2RX5, CHRN3, GRID1, P2RX7, GRIN3A, CHRN2, GRIN1, GRIN2A, GRIN2B, GRIA3                                                                                                                                                                                                                                                                                                                                                                                                                        |
| GO:007204  | positive regulation                                          | c17  | 251  | 0,64 | 3,41E-05 | P2RX5, CACNA1C, HTR2C, F2RL2, GALR1, C3AR1, EDNRA, P2RX7, NPY2R, OPR1L, GRIN1, NPSR1, GRIN2A, ESRR1, PTPRC, TRPM1, GRIN2B                                                                                                                                                                                                                                                                                                                                                                      |
| GO:0051480 | regulation of cytosol                                        | 18   | 289  | 0,61 | 4,85E-05 | P2RX5, KCNA5, CACNA1C, HTR2C, F2RL2, GALR1, C3AR1, EDNRA, P2RX7, NPY2R, OPR1L, GRIN1, NPSR1, GRIN2A, ESRR1, PTPRC, TRPM1, GRIN2B                                                                                                                                                                                                                                                                                                                                                               |
| GO:0098661 | inorganic anion transport                                    | 11   | 111  | 0,81 | 9,95E-05 | CLIC5, SLC17A1, SLC4A1, GABRA6, GABRB2, SLC26A5, SLC34A1, CLCN1, SLC12A5, GABRA2, SLC34A3                                                                                                                                                                                                                                                                                                                                                                                                      |
| GO:0098664 | G protein-coupled serotonin receptor activity                | 6    | 22   | 1,25 | 0,00013  | HTR2C, HTR6, OR10H5, HTR1A, HTR1F, HTR1B                                                                                                                                                                                                                                                                                                                                                                                                                                                       |
| GO:0035235 | ionotropic glutamate receptor activity                       | 6    | 25   | 1,19 | 0,00023  | GRID1, GRIN3A, GRIN1, GRIN2A, GRIN2B, GRIA3                                                                                                                                                                                                                                                                                                                                                                                                                                                    |
| GO:0042592 | homeostatic process                                          | 46   | 1491 | 0,3  | 0,00027  | RIPK3, AQP9, P2RX5, KCNA5, SIRT1, KCNH2, SLC4A1, CACNA1C, HTR2C, SCN2B, FGFR4, F2RL2, GALR1, C3AR1, MUC17, SLC26A5, SLC9C1, CD34, EDNRA, GHRHR, SLC34A1, P2RX7, NPY2R, OPR1L, NEO1, ADRB3, SCAR5, SLC9C2, GRIN1, KCNB1, AGTR2, SLC46A2, NPSR1, GRIN2A, SLC12A5, SLC4A10, SCN1B, ESRR1, PTPRC, MALRD1, HFE, CASR, ESRRB, TRPM1, SLC34A3, GRIN2B                                                                                                                                                 |
| GO:0044057 | regulation of system                                         | 23   | 516  | 0,46 | 0,00034  | KCNA5, CHRM3, KCNH2, CACNA1C, HTR2C, SCN2B, GALR1, SCN11A, KCNE3, CACNB2, TMEM108, NPY2R, OPR1L, PTGER3, CACNA1B, GRIN1, AGTR2, KCNE1L, GRIN2A, NRXN1, CALCRL, SCN1B, CASR                                                                                                                                                                                                                                                                                                                     |
| GO:0055065 | metal ion homeostasis                                        | 24   | 555  | 0,45 | 0,00034  | P2RX5, KCNA5, KCNH2, CACNA1C, HTR2C, F2RL2, GALR1, C3AR1, EDNRA, P2RX7, NPY2R, OPR1L, NEO1, SCAR5, GRIN1, AGTR2, NPSR1, GRIN2A, ESRR1, PTPRC, HFE, CASR, TRPM1, GRIN2B                                                                                                                                                                                                                                                                                                                         |
| GO:0015711 | organic anion transport                                      | 20   | 414  | 0,5  | 0,00042  | AQP9, SLC25A2, SLC17A1, SLC4A1, SLC17A6, SLC1A2, SLC23A1, SLC26A5, SLC16A11, SLC6A18, SLC2A2, SLC22A10, CALHM1, P2RX7, SLC22A9, SLC22A2, SLC22A6, GRM2, SLC17A3, SLC4A10                                                                                                                                                                                                                                                                                                                       |
| GO:0007200 | phospholipase C-actin regulation of localization             | 66   | 109  | 0,77 | 0,00047  | CHRM3, HTR2C, MCHR2, LHCGR, F2RL2, C3AR1, OPR1L, PTGER3, ESRR1, CASR                                                                                                                                                                                                                                                                                                                                                                                                                           |
| GO:0032879 | regulation of localization                                   | 66   | 2524 | 0,23 | 0,00047  | CLIC5, RIPK3, P2RX5, KCNJ8, KCNA5, DCL1, KCNH2, KCNQ4, CACNA1C, LRRTM2, HTR2C, SLC1A2, SCN2B, KCNA6, GALR1, C3AR1, SLC26A5, SCN11A, CD34, KCNE3, KCNK10, EDNRA, HTR1A, CACNB2, GHRHR, SLC34A1, SLC2A2, CALHM1, P2RX7, TMIGD1, NPY2R, OPR1L, CLCN1, ERBB4, RET, PTGER3, KCNK5, NTRK3, DDR2, CD244, CHRN2, ROS1, CD2, KCNA10, HTR1B, CACNA1B, GRIN1, KCNB1, AGTR2, KCNE1L, TNFRSF4, NPSR1, ACVRL1, KCNU1, VSTM2A, CACNA11, NRXN1, SCN9A, KCNK16, SCN1B, CRACR2A, PTPRC, HFE, CASR, KCNC2, KCNJ16 |
| GO:0070588 | calcium ion transport                                        | 13   | 189  | 0,65 | 0,00047  | CACNA1C, HTR2C, CACNB2, CALHM1, P2RX7, GRIN3A, CACNA1B, GRIN1, GRIN2A, CACNA11, PTPRC, TRPM1, GRIN2B                                                                                                                                                                                                                                                                                                                                                                                           |
| GO:0051963 | regulation of synaptic transmission                          | 9    | 86   | 0,83 | 0,00048  | LRRTM2, NTRK3, LRRTM3, CHRN2, GRIN1, MUSK, SYNDIG1, SLITRK6, NRXN1                                                                                                                                                                                                                                                                                                                                                                                                                             |
| GO:0060402 | calcium ion transport                                        | 8    | 65   | 0,9  | 0,00049  | CACNA1C, HTR2C, P2RX7, GRIN1, GRIN2A, PTPRC, TRPM1, GRIN2B                                                                                                                                                                                                                                                                                                                                                                                                                                     |
| GO:0042493 | response to drug                                             | 32   | 900  | 0,36 | 0,0005   | P2RX5, CD99, SLC25A2, KCNA5, RAMP2, CHRM3, KCNH2, SLC17A6, SLC47A1, HTR2C, SLC1A2, CHRN3, SLC26A5, SCN11A, SLC34A1, CALHM1, P2RX7, RET, NTRK3, GRIN3A, SLC22A2, CHRN2, HTR1B, GRIN1, AGTR2, CNR2, SLC22A6, GRIN2A, SLC17A3, SLC12A5, KCNC2, GRIN2B                                                                                                                                                                                                                                             |
| GO:0043270 | positive regulation                                          | c15  | 252  | 0,59 | 0,0005   | P2RX5, KCNH2, KCNE3, CACNB2, SLC34A1, P2RX7, NPY2R, CHRN2, GRIN1, KCNE1L, NPSR1, SCN1B, CRACR2A, CASR, KCNC2                                                                                                                                                                                                                                                                                                                                                                                   |
| GO:0006874 | cellular calcium ion                                         | 19   | 388  | 0,5  | 0,00053  | P2RX5, KCNA5, CACNA1C, HTR2C, F2RL2, GALR1, C3AR1, EDNRA, P2RX7, NPY2R, OPR1L, GRIN1, NPSR1, GRIN2A, ESRR1, PTPRC, CASR, TRPM1, GRIN2B                                                                                                                                                                                                                                                                                                                                                         |
| GO:0006875 | cellular metal ion                                           | hc22 | 499  | 0,46 | 0,00054  | P2RX5, KCNA5, CACNA1C, HTR2C, F2RL2, GALR1, C3AR1, EDNRA, P2RX7, NPY2R, OPR1L, SCAR5, GRIN1, AGTR2, NPSR1, GRIN2A, ESRR1, PTPRC, HFE, CASR, TRPM1, GRIN2B                                                                                                                                                                                                                                                                                                                                      |
| GO:0007610 | behavior                                                     | 23   | 541  | 0,44 | 0,0006   | HTR2C, SLC1A2, KCNK10, HTR1A, GRID1, NPY2R, OPR1L, ADRB3, CHRN2, HTR1B, CACNA1B, GRIN1, AGTR2, MUSK, GRIN2A, SLITRK6, NRXN1, SCN9A, SLC12A5, SLC4A10, CASR, GPR19, GRIN2B                                                                                                                                                                                                                                                                                                                      |
| GO:0010959 | regulation of metal ion                                      | 18   | 360  | 0,51 | 0,00066  | P2RX5, KCNA5, KCNH2, CACNA1C, SCN2B, KCNE3, CACNB2, P2RX7, OPR1L, CACNA1B, GRIN1, KCNE1L, NPSR1, SCN1B, CRACR2A, HFE, CASR, KCNC2                                                                                                                                                                                                                                                                                                                                                              |
| GO:0002027 | regulation of heart rate                                     | 9    | 95   | 0,79 | 0,0009   | KCNA5, KCNH2, CACNA1C, SCN2B, KCNE3, CACNB2, AGTR2, KCNE1L, SCN1B                                                                                                                                                                                                                                                                                                                                                                                                                              |
| GO:0006821 | chloride transport                                           | 9    | 101  | 0,76 | 0,0014   | CLIC5, SLC4A1, GABRA6, GABRB2, SLC26A5, CLCN1, SLC12A5, SLC4A10, GABRA2                                                                                                                                                                                                                                                                                                                                                                                                                        |
| GO:0015747 | urate transport                                              | 4    | 11   | 1,37 | 0,0018   | SLC17A1, SLC22A10, SLC22A6, SLC17A3                                                                                                                                                                                                                                                                                                                                                                                                                                                            |
| GO:0099623 | regulation of cardiac cell surface receptor activity         | 57   | 24   | 1,13 | 0,0019   | KCNA5, KCNH2, KCNE3, KCNE1L, SCN1B                                                                                                                                                                                                                                                                                                                                                                                                                                                             |
| GO:0007166 | cell surface receptor activity                               | 57   | 2198 | 0,23 | 0,0021   | P2RX5, KCNA5, GPR133, HPL1, RL2, MS4A2, CHRN3, LILRA4, FGFR4, CLEC1B, CD3D, C3AR1, MUC17, CS PG4, GHRHR, GRID1, RTN4R1, P2RX7, PLAUR, NCR3, ERBB4, RET, TNFRSF14, CCRL2, NTRK3, GRIN3A, LRRTM3, DDR2, FCGR3A, CHRN2, ROS1, FCGR1B, CD2, GRIN1, KCNB1, AGTR2, IRS4, EPHA10, MUSK, TNFRSF4, MUC3A, SIRPB1, ACVRL1, EPHA6, GRM2, GRIN2A, CSF2RB, CD8A, CALCRL, CXCR6, PTPRC, HFE, TRPM1, KLRC1, GRIN2B, GRIA3, PRLR                                                                               |
| GO:0007189 | adenylate cyclase activity                                   | 8    | 88   | 0,77 | 0,003    | RAMP2, GPR133, LHCGR, GALR1, MC5R, GHRHR, ADRB3, CALCRL                                                                                                                                                                                                                                                                                                                                                                                                                                        |
| GO:0001964 | startle response                                             | 5    | 27   | 1,08 | 0,0031   | GRIN3A, GRIN1, GRIN2A, SLITRK6, NRXN1                                                                                                                                                                                                                                                                                                                                                                                                                                                          |
| GO:0086019 | cell-cell signaling                                          | 5    | 27   | 1,08 | 0,0031   | KCNA5, CACNA1C, CACNB2, KCNE1L, SCN1B                                                                                                                                                                                                                                                                                                                                                                                                                                                          |
| GO:0019935 | cyclic-nucleotide-mediated atrial cardiac muscle contraction | 9    | 115  | 0,71 | 0,0032   | RAMP2, GPR133, LHCGR, GALR1, MC5R, GHRHR, ADRB3, CALCRL, KCNC2                                                                                                                                                                                                                                                                                                                                                                                                                                 |
| GO:0086014 | atrial cardiac muscle contraction                            | 4    | 14   | 1,27 | 0,0036   | KCNA5, CACNA1C, CACNB2, KCNE1L                                                                                                                                                                                                                                                                                                                                                                                                                                                                 |
| GO:0050795 | regulation of behavior                                       | 7    | 68   | 0,82 | 0,0037   | HTR1A, GHRHR, NPY2R, OPR1L, CHRN2, HTR1B, NRXN1                                                                                                                                                                                                                                                                                                                                                                                                                                                |
| GO:0006936 | muscle contraction                                           | 13   | 244  | 0,54 | 0,0042   | KCNJ8, KCNA5, CHRM3, KCNH2, CACNA1C, SCN2B, EDNRA, CACNB2, CLCN1, PTGER3, CHRN2, KCNE1L, SCN1B                                                                                                                                                                                                                                                                                                                                                                                                 |
| GO:0007631 | feeding behavior                                             | 8    | 94   | 0,74 | 0,0042   | HTR2C, NPY2R, OPR1L, ADRB3, CHRN2, HTR1B, GRIN1, GPR19                                                                                                                                                                                                                                                                                                                                                                                                                                         |
| GO:1902476 | chloride transmembrane transport                             | 8    | 94   | 0,74 | 0,0042   | CLIC5, SLC4A1, GABRA6, GABRB2, SLC26A5, CLCN1, SLC12A5, GABRA2                                                                                                                                                                                                                                                                                                                                                                                                                                 |
| GO:0034219 | carbohydrate transmembrane transport                         | 6    | 50   | 0,89 | 0,005    | AQP9, SLC5A9, SLC23A1, SLC26A5, EDNRA, SLC2A2                                                                                                                                                                                                                                                                                                                                                                                                                                                  |
| GO:0051259 | protein complex oligomerization                              | 20   | 512  | 0,4  | 0,005    | RIPK3, KCNA5, SLC1A2, KCNA6, CD3D, SLC26A5, SLC34A1, CALHM1, P2RX7, SCAR5, RXRG, KCTD8, CHRN2, KCNA10, GRIN1, KCNB1, SLC22A6, TRPM1, KCNC2, GRIN2B                                                                                                                                                                                                                                                                                                                                             |
| GO:0030322 | stabilization of membrane potential                          | 4    | 16   | 1,21 | 0,0051   | KCNK10, KCNK5, KCNK16, KCNK9                                                                                                                                                                                                                                                                                                                                                                                                                                                                   |
| GO:0086013 | membrane repolarization                                      | 4    | 16   | 1,21 | 0,0051   | KCNJ8, KCNA5, KCNH2, KCNE1L                                                                                                                                                                                                                                                                                                                                                                                                                                                                    |
| GO:0019233 | sensory perception                                           | 7    | 75   | 0,78 | 0,0059   | P2RX7, OPR1L, CHRN2, GRIN1, CNR2, GRIN2A, SCN9A                                                                                                                                                                                                                                                                                                                                                                                                                                                |
| GO:0003012 | muscle system process                                        | 14   | 291  | 0,49 | 0,006    | KCNJ8, KCNA5, CHRM3, KCNH2, CACNA1C, SCN2B, EDNRA, CACNB2, CLCN1, PTGER3, CHRN2, AGTR2, KCNE1L, SCN1B                                                                                                                                                                                                                                                                                                                                                                                          |
| GO:0006817 | phosphate ion transport                                      | 4    | 17   | 1,18 | 0,006    | SLC17A1, SLC34A1, SLC17A3, SLC34A3                                                                                                                                                                                                                                                                                                                                                                                                                                                             |
| GO:0086012 | membrane depolarization                                      | 4    | 17   | 1,18 | 0,006    | CACNA1C, SCN2B, CACNB2, SCN1B                                                                                                                                                                                                                                                                                                                                                                                                                                                                  |
| GO:0019226 | transmission of nerve impulse                                | 6    | 53   | 0,87 | 0,0061   | SCN11A, KCNMB3, CLCN1, CACNA11, SCN9A, SCN1B                                                                                                                                                                                                                                                                                                                                                                                                                                                   |
| GO:0050807 | regulation of synaptic transmission                          | 10   | 161  | 0,6  | 0,0067   | LRRTM2, NTRK3, LRRTM3, CHRN2, GRIN1, MUSK, SYNDIG1, SLITRK6, NRXN1, GRIN2B                                                                                                                                                                                                                                                                                                                                                                                                                     |
| GO:0046883 | regulation of hormone secretion                              | 13   | 261  | 0,51 | 0,0069   | KCNA5, CACNA1C, HTR2C, GALR1, HTR1A, GHRHR, SLC2A2, KCNB1, AGTR2, NRXN1, HFE, CASR, KCNC2                                                                                                                                                                                                                                                                                                                                                                                                      |
| GO:0018108 | peptidyl-tyrosine phosphorylation                            | 11   | 195  | 0,56 | 0,0073   | FGFR4, ERBB4, RET, NTRK3, DDR2, ROS1, EPHA10, MUSK, EPHA6, CSF2RB, PRLR                                                                                                                                                                                                                                                                                                                                                                                                                        |
| GO:0055083 | monovalent inorganic ion transport                           | 4    | 19   | 1,13 | 0,0081   | FGFR4, SLC34A1, SLC12A5, SLC34A3                                                                                                                                                                                                                                                                                                                                                                                                                                                               |
| GO:0044341 | sodium-dependent transport                                   | 3    | 7    | 1,44 | 0,0082   | SLC17A1, SLC34A1, SLC34A3                                                                                                                                                                                                                                                                                                                                                                                                                                                                      |
| GO:0045188 | regulation of circadian rhythm                               | 3    | 7    | 1,44 | 0,0082   | GHRHR, NPY2R, CHRN2                                                                                                                                                                                                                                                                                                                                                                                                                                                                            |
| GO:0098739 | import across plasma membrane                                | 7    | 82   | 0,74 | 0,0087   | KCNJ8, SLC1A2, SLC9C1, SLC34A1, SLC9C2, HFE, KCNJ16                                                                                                                                                                                                                                                                                                                                                                                                                                            |
| GO:0097553 | calcium ion transport                                        | 6    | 58   | 0,83 | 0,0088   | HTR2C, P2RX7, GRIN1, GRIN2A, PTPRC, GRIN2B                                                                                                                                                                                                                                                                                                                                                                                                                                                     |
| GO:0060307 | regulation of ventricular contraction                        | 4    | 20   | 1,11 | 0,0091   | KCNH2, KCNE3, KCNE1L, SCN1B                                                                                                                                                                                                                                                                                                                                                                                                                                                                    |
| GO:0007218 | neuropeptide signaling                                       | 8    | 110  | 0,67 | 0,0092   | SORCS1, MCHR2, GALR1, NPY2R, OPR1L, NPSR1, GPR19, GPR1                                                                                                                                                                                                                                                                                                                                                                                                                                         |
| GO:0031644 | regulation of neuroleptic response                           | 8    | 112  | 0,67 | 0,0101   | HTR2C, SCN11A, TMEM108, NPY2R, OPR1L, GRIN1, GRIN2A, NRXN1                                                                                                                                                                                                                                                                                                                                                                                                                                     |
| GO:0051260 | protein homooligomerization                                  | 14   | 312  | 0,46 | 0,0101   | RIPK3, KCNA5, SLC1A2, KCNA6, CD3D, SLC34A1, CALHM1, SCAR5, RXRG, KCTD8, KCNA10, KCNB1, SLC22A6, KCNC2                                                                                                                                                                                                                                                                                                                                                                                          |
| GO:0034767 | positive regulation                                          | c9   | 142  | 0,61 | 0,0103   | KCNH2, KCNE3, CACNB2, SLC34A1, P2RX7, KCNE1L, NPSR1, CRACR2A, KCNC2                                                                                                                                                                                                                                                                                                                                                                                                                            |
| GO:0015749 | monosaccharide transport                                     | 5    | 39   | 0,92 | 0,0104   | SLC5A9, SLC23A1, SLC26A5, EDNRA, SLC2A2                                                                                                                                                                                                                                                                                                                                                                                                                                                        |
| GO:0045759 | negative regulation                                          | 3    | 8    | 1,39 | 0,0104   | KCNE3, CHRN2, CNR2                                                                                                                                                                                                                                                                                                                                                                                                                                                                             |
| GO:0098976 | excitatory chemical transmission                             | 3    | 8    | 1,39 | 0,0104   | GRIN1, GRIN2A, GRIN2B                                                                                                                                                                                                                                                                                                                                                                                                                                                                          |
| GO:0051046 | regulation of secretion                                      | 24   | 728  | 0,33 | 0,0105   | KCNA5, CACNA1C, HTR2C, GALR1, CD34, HTR1A, GHRHR, SLC2A2, P2RX7, NPY2R, OPR1L, PTGER3, CD244, CHRN2, CD2, HTR1B, KCNB1, AGTR2, TNFRSF4, CACNA11, NRXN1, HFE, CASR, KCNC2                                                                                                                                                                                                                                                                                                                       |
| GO:0051928 | positive regulation                                          | c8   | 115  | 0,65 | 0,0115   | P2RX5, KCNE3, CACNB2, P2RX7, GRIN1, NPSR1, CRACR2A, CASR                                                                                                                                                                                                                                                                                                                                                                                                                                       |
| GO:0015851 | nucleobase transport                                         | 3    | 9    | 1,33 | 0,0133   | AQP9, SLC23A1, SLC28A1                                                                                                                                                                                                                                                                                                                                                                                                                                                                         |
| GO:0097623 | potassium ion export                                         | 3    | 9    | 1,33 | 0,0133   | KCNA5, KCNH2, KCNE1L                                                                                                                                                                                                                                                                                                                                                                                                                                                                           |
| GO:1903522 | regulation of blood flow                                     | c12  | 249  | 0,49 | 0,0133   | KCNA5, CHRM3, KCNH2, CACNA1C, SCN2B, KCNE3, CACNB2, CACNA1B, AGTR2, KCNE1L, SCN1B, CASR                                                                                                                                                                                                                                                                                                                                                                                                        |
| GO:0051965 | positive regulation                                          | c6   | 65   | 0,78 | 0,0138   | LRRTM2, NTRK3, LRRTM3, SYNDIG1, SLITRK6, NRXN1                                                                                                                                                                                                                                                                                                                                                                                                                                                 |
| GO:0055067 | monovalent inorganic ion transport                           | 8    | 119  | 0,64 | 0,0138   | KCNA5, KCNH2, SLC4A1, SLC26A5, SLC9C1, SLC9C2, AGTR2, SLC4A10                                                                                                                                                                                                                                                                                                                                                                                                                                  |
| GO:0007214 | gamma-aminobutyric acid receptor activity                    | 4    | 24   | 1,03 | 0,0147   | GABRA6, GABRB2, GABBR1, GABRA2                                                                                                                                                                                                                                                                                                                                                                                                                                                                 |
| GO:0050909 | sensory perception                                           | 6    | 66   | 0,77 | 0,0147   | TAS2R60, CALHM1, SCN1D, TAS2R31, TAS2R41, TAS2R38                                                                                                                                                                                                                                                                                                                                                                                                                                              |

|            |                         |     |       |        |                                                                                                                                                                        |                                                                                                                                                                                                                                                                            |
|------------|-------------------------|-----|-------|--------|------------------------------------------------------------------------------------------------------------------------------------------------------------------------|----------------------------------------------------------------------------------------------------------------------------------------------------------------------------------------------------------------------------------------------------------------------------|
| GO:0098659 | inorganic cation imp    | 66  | 0,77  | 0,0147 | KCNJ8,SLC9C1,SLC34A1,SLC9C2,HFE,KCNJ16                                                                                                                                 |                                                                                                                                                                                                                                                                            |
| GO:0033555 | multicellular organis   | 67  | 0,76  | 0,0155 | HTR2C,HTR1A,NPY2R,RET,CACNA1B,SCN9A                                                                                                                                    |                                                                                                                                                                                                                                                                            |
| GO:0051050 | positive regulation c   | 27  | 0,29  | 0,0155 | P2RX5,KCNH2,SLC1A2,GALR1,CD34,KCNE3,CACNB2,GHRHR,SLC34A1,P2RX7,NPY2R,OPRL1,CD244,CHRN2,CD2,GRIN1,KCNB1,AGTR2,KCNE1L,TNFRSF4,NPSR1,CACNA11,SCN1B,CRACR2A,HFE,CASR,KCNC2 |                                                                                                                                                                                                                                                                            |
| GO:0002791 | regulation of peptid    | 17  | 0,39  | 0,0161 | KCNA5,CACNA1C,HTR2C,CD34,GHRHR,SLC2A2,P2RX7,NPY2R,CD244,CD2,KCNB1,AGTR2,TNFRSF4,NRXN1,HFE,CASR,KCNC2                                                                   |                                                                                                                                                                                                                                                                            |
| GO:0001914 | regulation of T cell    | 4   | 1,02  | 0,0165 | RIPK3,P2RX7,NCR3,PTPRC                                                                                                                                                 |                                                                                                                                                                                                                                                                            |
| GO:0007190 | activation of adenyl    | 25  | 1,02  | 0,0165 | LHCGR,EDNRA,GHRHR,ADRB3                                                                                                                                                |                                                                                                                                                                                                                                                                            |
| GO:0090102 | cochlea developme       | 5   | 0,86  | 0,0168 | HPN,GABRB2,SLC26A5,NTRK3,SLITRK6                                                                                                                                       |                                                                                                                                                                                                                                                                            |
| GO:1903530 | regulation of secreti   | 22  | 0,33  | 0,0174 | KCNA5,CACNA1C,HTR2C,GALR1,CD34,HTR1A,GHRHR,SLC2A2,P2RX7,NPY2R,CD244,CHRN2,CD2,HTR1B,KCNB1,AGTR2,TNFRSF4,CACNA11,NRXN1,HFE,CASR,KCNC2                                   |                                                                                                                                                                                                                                                                            |
| GO:0002682 | regulation of immun     | 37  | 1,391 | 0,24   | 0,0181                                                                                                                                                                 | RIPK3,TREM1,SIT1,IL1RL2,MS4A2,CD226,LILRA4,LHCGR,CD3D,C3AR1,MUC17,CD34,P2RX7,KIR2DL4,NCR3,TREML4,TNFRSF14,FCGR3A,CD244,CHRN2,FCGR1B,CD2,SLC46A2,CNR2,TNFRSF4,MUC3A,KIR3DL1,LAIR1,CD8A,ESR1,PTPRC,HFE,TMEM176A,TIGIT,CD200,KLRC1,TARM1                                      |
| GO:0009987 | cellular process        | 249 | 14652 | 0,04   | 0,0202                                                                                                                                                                 | CLIC5,RIPK3,AQP9,AQP9,P2RX5,CD69,GPR83,PCDH6,SLC25A2,KCNJ8,SLC17A1,TREM1,OR7C1,KCNA5,RAMP2,CHRM3,DCLK1,SIT1,GPR133,KCNH2,SLC4A1,HPN,KCND4,SORCS1,IL1RL2,CACNA1C,GABRA6,GABRB2,LHR2,HTR2C,SLC1A2,MS4A2,SCN2B,KCNE3,CACNB2,CACNA1B,AGTR2,CASR,CACNA1C,KCNE3,CHRN2,KCNB1,CNR2 |
| GO:0034764 | positive regulation c   | 10  | 194   | 0,52   | 0,0203                                                                                                                                                                 | KCNH2,SLC1A2,KCNE3,CACNB2,SLC34A1,P2RX7,KCNE1L,NPSR1,CRACR2A,KCNC2                                                                                                                                                                                                         |
| GO:0035296 | regulation of tube di   | 8   | 129   | 0,6    | 0,0205                                                                                                                                                                 | KCNA5,CHRM3,EDNRA,HTR1A,ADRB3,HTR1B,AGTR2,CASR                                                                                                                                                                                                                             |
| GO:0098900 | regulation of action    | 5   | 48    | 0,83   | 0,0211                                                                                                                                                                 | CACNA1C,KCNE3,CHRN2,KCNB1,CNR2                                                                                                                                                                                                                                             |
| GO:0003018 | vascular process in     | 9   | 162   | 0,56   | 0,0212                                                                                                                                                                 | KCNA5,RAMP2,CHRM3,EDNRA,HTR1A,ADRB3,HTR1B,AGTR2,CASR                                                                                                                                                                                                                       |
| GO:0050433 | regulation of catech    | 5   | 49    | 0,82   | 0,0227                                                                                                                                                                 | NPY2R,CHRN2,HTR1B,KCNB1,AGTR2                                                                                                                                                                                                                                              |
| GO:1903765 | negative regulation     | 2   | 2     | 1,81   | 0,0227                                                                                                                                                                 | KCNH2,KCNE3                                                                                                                                                                                                                                                                |
| GO:0033605 | positive regulation     | 3   | 12    | 1,21   | 0,023                                                                                                                                                                  | NPY2R,CHRN2,KCNB1                                                                                                                                                                                                                                                          |
| GO:0051924 | regulation of calciu    | 11  | 236   | 0,48   | 0,0243                                                                                                                                                                 | P2RX5,CACNA1C,KCNE3,CACNB2,P2RX7,OPRL1,CACNA1B,GRIN1,NPSR1,CRACR2A,CASR                                                                                                                                                                                                    |
| GO:0008016 | regulation of heart     | 10  | 201   | 0,51   | 0,0248                                                                                                                                                                 | KCNA5,KCNH2,CACNA1C,SCN2B,KCNE3,CACNB2,CACNA1B,AGTR2,KCNE1L,SCN1B                                                                                                                                                                                                          |
| GO:0045471 | response to ethanol     | 8   | 134   | 0,59   | 0,0248                                                                                                                                                                 | NTRK3,GRIN3A,CHRN2,HTR1B,GRIN1,GRIN2A,KCNC2,GRIN2B                                                                                                                                                                                                                         |
| GO:0051047 | positive regulation     | 15  | 393   | 0,39   | 0,0251                                                                                                                                                                 | GALR1,CD34,GHRHR,P2RX7,NPY2R,OPRL1,CD244,CHRN2,CD2,KCNB1,AGTR2,TNFRSF4,CACNA11,HFE,CASR                                                                                                                                                                                    |
| GO:0098657 | import into cell        | 20  | 609   | 0,33   | 0,0261                                                                                                                                                                 | CEACAM4,KCNJ8,RAMP2,SLC1A2,TMPRSS5,SLAMF1,SLC9C1,SLC34A1,TMEM108,P2RX7,SCAR5,SLC9C2,FCGR3A,FCGR1B,HTR1B,STAB2,CALCRL,HFE,MRC1,KCNJ16                                                                                                                                       |
| GO:1901700 | response to oxygen      | 37  | 1427  | 0,23   | 0,0261                                                                                                                                                                 | KCNA5,CHRM3,EDNRA,HTR1A,ADRB3,HTR1B,AGTR2,CASR,CACNA1C,KCNE3,CHRN2,KCNB1,CNR2                                                                                                                                                                                              |
| GO:0030320 | cellular monovalent     | 3   | 13    | 1,17   | 0,0269                                                                                                                                                                 | KCNA5,KCNH2,KCNE3,KCNE1L                                                                                                                                                                                                                                                   |
| GO:0043267 | negative regulation     | 4   | 30    | 0,94   | 0,0269                                                                                                                                                                 | KCNA5,CACNA1C,HTR2C,GHRHR,SLC2A2,KCNB1,NRXN1,HFE,CASR,KCNC2                                                                                                                                                                                                                |
| GO:0090276 | regulation of peptid    | 10  | 204   | 0,5    | 0,0269                                                                                                                                                                 | KCNA5,CACNA1C,HTR2C,GHRHR,SLC2A2,KCNB1,NRXN1,HFE,CASR,KCNC2                                                                                                                                                                                                                |
| GO:0097746 | regulation of blood     | 8   | 137   | 0,58   | 0,027                                                                                                                                                                  | KCNA5,CHRM3,EDNRA,HTR1A,ADRB3,HTR1B,AGTR2,CASR                                                                                                                                                                                                                             |
| GO:0002250 | adaptive immune r       | 12  | 280   | 0,44   | 0,0281                                                                                                                                                                 | SIT1,FCRL4,CD3D,SLAMF1,CD244,CD1E,FCGR1B,LAIR1,LILRA6,CD8A,CRACR2A,TARM1                                                                                                                                                                                                   |
| GO:0019228 | neuronal action pot     | 4   | 31    | 0,92   | 0,0293                                                                                                                                                                 | SCN11A,KCNMB3,CACNA11,SCN9A                                                                                                                                                                                                                                                |
| GO:0007157 | heterophilic cell-cell  | 5   | 54    | 0,78   | 0,031                                                                                                                                                                  | CD226,NCR3,NRXN1,TIGIT,CD200                                                                                                                                                                                                                                               |
| GO:0055062 | phosphate ion hom       | 3   | 14    | 1,14   | 0,031                                                                                                                                                                  | FGFR4,SLC34A1,SLC34A3                                                                                                                                                                                                                                                      |
| GO:0060134 | prepulse inhibition     | 3   | 14    | 1,14   | 0,031                                                                                                                                                                  | GRIN3A,GRIN1,NRXN1                                                                                                                                                                                                                                                         |
| GO:1903532 | positive regulation     | 14  | 364   | 0,4    | 0,031                                                                                                                                                                  | GALR1,CD34,GHRHR,P2RX7,NPY2R,CD244,CHRN2,CD2,KCNB1,AGTR2,TNFRSF4,CACNA11,HFE,CASR                                                                                                                                                                                          |
| GO:0051482 | positive regulation     | 4   | 32    | 0,91   | 0,0315                                                                                                                                                                 | HTR2C,F2RL2,C3AR1,OPRL1                                                                                                                                                                                                                                                    |
| GO:0043271 | negative regulation     | 8   | 143   | 0,56   | 0,033                                                                                                                                                                  | KCNA5,KCNH2,SLC26A5,KCNE3,OPRL1,HTR1B,AGTR2,KCNE1L                                                                                                                                                                                                                         |
| GO:0015855 | pyrimidine nucleob      | 2   | 3     | 1,64   | 0,0332                                                                                                                                                                 | AQP9,SLC28A1                                                                                                                                                                                                                                                               |
| GO:0034155 | regulation of toll-like | 2   | 3     | 1,64   | 0,0332                                                                                                                                                                 | LILRA4,TREML4                                                                                                                                                                                                                                                              |
| GO:0046010 | positive regulation     | 2   | 3     | 1,64   | 0,0332                                                                                                                                                                 | GHRHR,NPY2R                                                                                                                                                                                                                                                                |
| GO:0051952 | regulation of amine     | 6   | 82    | 0,68   | 0,0332                                                                                                                                                                 | P2RX7,NPY2R,CHRN2,HTR1B,KCNB1,AGTR2                                                                                                                                                                                                                                        |
| GO:0098912 | membrane depolari       | 2   | 3     | 1,64   | 0,0332                                                                                                                                                                 | CACNA1C,CACNB2                                                                                                                                                                                                                                                             |
| GO:0043029 | T cell homeostasis      | 4   | 33    | 0,9    | 0,0338                                                                                                                                                                 | RIPK3,SIT1,P2RX7,SLC46A2                                                                                                                                                                                                                                                   |
| GO:0035435 | phosphate ion trans     | 3   | 15    | 1,11   | 0,0346                                                                                                                                                                 | SLC17A1,SLC34A1,SLC34A3                                                                                                                                                                                                                                                    |
| GO:0098719 | sodium ion import       | 3   | 15    | 1,11   | 0,0346                                                                                                                                                                 | SLC9C1,SLC34A1,SLC9C2                                                                                                                                                                                                                                                      |
| GO:1904062 | regulation of cation    | 12  | 294   | 0,42   | 0,0377                                                                                                                                                                 | KCNH2,CACNA1C,SCN2B,KCNE3,CACNB2,OPRL1,KCNE1L,NPSR1,NRXN1,SCN1B,CRACR2A,KCNC2                                                                                                                                                                                              |
| GO:0002709 | regulation of T cell    | 5   | 58    | 0,75   | 0,0383                                                                                                                                                                 | RIPK3,P2RX7,NCR3,PTPRC,HFE                                                                                                                                                                                                                                                 |
| GO:0051954 | positive regulation     | 4   | 35    | 0,87   | 0,0401                                                                                                                                                                 | P2RX7,NPY2R,CHRN2,KCNB1                                                                                                                                                                                                                                                    |
| GO:0001910 | regulation of leukoc    | 5   | 60    | 0,73   | 0,0435                                                                                                                                                                 | RIPK3,CD226,P2RX7,NCR3,PTPRC                                                                                                                                                                                                                                               |
| GO:0006835 | dicarboxylic acid tra   | 5   | 60    | 0,73   | 0,0435                                                                                                                                                                 | SLC17A6,SLC1A2,SLC26A5,SLC22A6,GRM2                                                                                                                                                                                                                                        |
| GO:0045761 | regulation of adenyl    | 4   | 36    | 0,86   | 0,0435                                                                                                                                                                 | LHCGR,GALR1,GABBR1,GRM2                                                                                                                                                                                                                                                    |
| GO:0071242 | cellular response to    | 5   | 60    | 0,73   | 0,0435                                                                                                                                                                 | CHRM3,GABRB2,SLC34A1,CHRN2,KCNC2                                                                                                                                                                                                                                           |
| GO:0009636 | response to toxic su    | 16  | 468   | 0,35   | 0,0438                                                                                                                                                                 | KCNA5,SCN2B,CHRN3,SLC23A1,SLC22A8,NTRK3,GRIN3A,CHRN2,HTR1B,GRIN1,CNR2,GRIN2A,SCN9A,SCN1B,KCNC2,GRIN2B                                                                                                                                                                      |
| GO:0006952 | defense response        | 32  | 1234  | 0,23   | 0,0458                                                                                                                                                                 | KCNJ8,TREM1,IL1RL2,HTR2C,MS4A2,LILRA4,CLEC1B,C3AR1,SLAMF1,KLRC4,HTR1A,P2RX7,NPY2R,KIR2DL4,NCR3,TREML4,TNFRSF14,CD244,FCGR1B,AGTR2,CNR2,TNFRSF4,SIRPB1,STAB2,KIR3DL1,SCN9A,CXCR6,PTPRC,HFE,TARM1,MRC1                                                                       |
| GO:0007198 | adenylate cyclase-ir    | 2   | 4     | 1,51   | 0,0458                                                                                                                                                                 | HTR1A,HTR1B                                                                                                                                                                                                                                                                |
| GO:0008645 | hexose transmembr       | 4   | 37    | 0,85   | 0,0458                                                                                                                                                                 | SLC5A9,SLC26A5,EDNRA,SLC2A2                                                                                                                                                                                                                                                |
| GO:0035585 | calcium-mediated si     | 2   | 4     | 1,51   | 0,0458                                                                                                                                                                 | CACNA1C,P2RX7                                                                                                                                                                                                                                                              |
| GO:0046684 | response to pyrethr     | 2   | 4     | 1,51   | 0,0458                                                                                                                                                                 | SCN2B,SCN1B                                                                                                                                                                                                                                                                |
| GO:0070837 | dehydroascorbic ac      | 2   | 4     | 1,51   | 0,0458                                                                                                                                                                 | SLC23A1,SLC2A2                                                                                                                                                                                                                                                             |
| GO:0071918 | urea transmembran       | 2   | 4     | 1,51   | 0,0458                                                                                                                                                                 | AQP9,SLC14A1                                                                                                                                                                                                                                                               |
| GO:0097091 | synaptic vesicle clu    | 2   | 4     | 1,51   | 0,0458                                                                                                                                                                 | SYNDIG1,NRXN1                                                                                                                                                                                                                                                              |
| GO:0098815 | modulation of excita    | 4   | 37    | 0,85   | 0,0458                                                                                                                                                                 | TMEM108,NPY2R,GRIN1,NRXN1                                                                                                                                                                                                                                                  |
| GO:1990410 | adrenomedullin rec      | 2   | 4     | 1,51   | 0,0458                                                                                                                                                                 | RAMP2,CALCRL                                                                                                                                                                                                                                                               |
| GO:0006359 | response to ammon       | 7   | 122   | 0,57   | 0,0478                                                                                                                                                                 | CHRM3,GABRB2,SLC34A1,CHRN2,HTR1B,GRIN1,KCNC2                                                                                                                                                                                                                               |
| GO:0051930 | regulation of sensor    | 4   | 38    | 0,83   | 0,049                                                                                                                                                                  | SCN11A,NPY2R,OPRL1,GRIN2A                                                                                                                                                                                                                                                  |
| GO:0006833 | water transport         | 3   | 18    | 1,03   | 0,0495                                                                                                                                                                 | AQP9,AQP9,SLC14A1                                                                                                                                                                                                                                                          |
