# Supplementary material for: Early Reduction of SARS-CoV-2 Replication in Bronchial Epithelium by Kinin B2 Receptor Antagonism
Source: bioRxiv or medRxiv preprint supplement (doi:10.1101/2021.08.13.21262037), 2021-08-18
Supplement: Supplementary file [file media-21.pdf]

**Supplemental Table S19. Membrane-bound cell surface receptor DEGs, upregulated in SARS-CoV-2 versus medium**

| ProbeName     | p ([SARS-Cov-2]Regulatic FC ([SARS-C GeneSymbo | Description                                                                                                                                   |
|---------------|------------------------------------------------|-----------------------------------------------------------------------------------------------------------------------------------------------|
| A_23_P95536   | 0,032593332 up                                 | 2,0564296 ADAM29 Homo sapiens ADAM metalloproteinase domain 29 (ADAM29), transcript variant 1, mRNA [NM_014269]                               |
| A_33_P3360296 | 0,04713104 up                                  | 2,1182783 ANTXRL Homo sapiens anthrax toxin receptor-like (ANTXRL), mRNA [NM_001278688]                                                       |
| A_33_P3415012 | 0,003580882 up                                 | 2,2150555 KCNA6 Homo sapiens potassium channel, voltage gated shaker related subfamily A, member 6 (KCNA6), mRNA [NM_002235]                  |
| A_33_P3270104 | 0,036002126 up                                 | 1,6818469 FAM26D Homo sapiens family with sequence similarity 26, member D (FAM26D), transcript variant 1, mRNA [NM_001256887]                |
| A_23_P38634   | 0,034794565 up                                 | 1,6641743 OR1G1 Homo sapiens olfactory receptor, family 1, subfamily G, member 1 (OR1G1), mRNA [NM_003555]                                    |
| A_33_P3406836 | 0,011732406 up                                 | 1,7898222 HTR1F Homo sapiens 5-hydroxytryptamine (serotonin) receptor 1F, G protein-coupled (HTR1F), mRNA [NM_000866]                         |
| A_33_P3416757 | 0,047634322 up                                 | 1,5079808 PRLR Homo sapiens prolactin receptor (PRLR), transcript variant 2, mRNA [NM_001204315]                                              |
| A_24_P945096  | 0,03653614 up                                  | 1,7702624 CACNA1I Homo sapiens calcium channel, voltage-dependent, T type, alpha 1I subunit (CACNA1I), transcript variant 1, mRNA [NM_021096] |
| A_33_P3396244 | 0,035009935 up                                 | 1,990737 NPY2R Homo sapiens neuropeptide Y receptor Y2 (NPY2R), mRNA [NM_000910]                                                              |
| A_33_P3340014 | 0,010722341 up                                 | 2,0883427 TRO Homo sapiens trophinin (TRO), transcript variant 3, mRNA [NM_016157]                                                            |
| A_21_P0010873 | 0,043899916 up                                 | 1,5941203 ANTXRLP1 Homo sapiens anthrax toxin receptor-like pseudogene 1 (ANTXRLP1), transcript variant 2, non-coding RNA [NR_103828]         |
| A_24_P170439  | 0,015414147 up                                 | 1,8931247 TREML3P Homo sapiens triggering receptor expressed on myeloid cells-like 3, pseudogene (TREML3P), non-coding RNA [NR_027256]        |
| A_33_P3355856 | 0,026495013 up                                 | 1,7257988 olfactory receptor, family 51, subfamily J, member 1 (gene/pseudogene) [Source:HGNC Symbol;Acc:HGNC:14856] [ENST00000332043]        |
| A_33_P3413558 | 0,008619091 up                                 | 2,6380665 CD226 CD226 molecule [Source:HGNC Symbol;Acc:HGNC:16961] [ENST00000280200]                                                          |
| A_33_P3241021 | 0,02955563 up                                  | 2,0316834 CD69 CD69 molecule [Source:HGNC Symbol;Acc:HGNC:1694] [ENST00000416624]                                                             |
| A_33_P3326271 | 0,011921781 up                                 | 1,9606916 OR13C2 Homo sapiens olfactory receptor, family 13, subfamily C, member 2 (OR13C2), mRNA [NM_001004481]                              |
| A_33_P3280646 | 0,048862424 up                                 | 1,7165905 CASR Homo sapiens calcium-sensing receptor (CASR), transcript variant 1, mRNA [NM_001178065]                                        |
| A_23_P337867  | 0,041624285 up                                 | 1,6760936 TAS2R41 Homo sapiens taste receptor, type 2, member 41 (TAS2R41), mRNA [NM_176883]                                                  |
| A_24_P319113  | 0,031806596 up                                 | 1,6776376 P2RX7 Homo sapiens purinergic receptor P2X, ligand-gated ion channel, 7 (P2RX7), transcript variant 1, mRNA [NM_002562]             |
| A_23_P43369   | 0,022677582 up                                 | 1,7351198 SIT1 Homo sapiens signaling threshold regulating transmembrane adaptor 1 (SIT1), mRNA [NM_014450]                                   |
| A_33_P3400239 | 0,025245482 up                                 | 1,9221019 SYNDIG1 PREDICTED: Homo sapiens synapse differentiation inducing 1 (SYNDIG1), transcript variant X1, mRNA [XM_006723626]            |
| A_33_P3363725 | 0,03290714 up                                  | 1,9861467 OR52N5 Homo sapiens olfactory receptor, family 52, subfamily N, member 5 (OR52N5), mRNA [NM_001001922]                              |
| A_33_P3211488 | 0,048390158 up                                 | 1,5444185 OR6K3 Homo sapiens olfactory receptor, family 6, subfamily K, member 3 (OR6K3), mRNA [NM_001005327]                                 |
| A_24_P941896  | 0,04121485 up                                  | 1,5743759 GRID1 Homo sapiens glutamate receptor, ionotropic, delta 1 (GRID1), mRNA [NM_017551]                                                |
| A_33_P3218980 | 0,028221466 up                                 | 1,6104319 ENTPD1 Homo sapiens ectonucleoside triphosphate diphosphohydrolase 1 (ENTPD1), transcript variant 1, mRNA [NM_001776]               |
| A_23_P92650   | 1,35E-04 up                                    | 3,6780155 SLC25A2 Homo sapiens solute carrier family 25 (mitochondrial carrier; ornithine transporter) member 2 (SLC25A2), mRNA [NM_031947]   |
| A_33_P3230189 | 0,009609546 up                                 | 1,6858562 SLITRK6 Homo sapiens SLIT and NTRK-like family, member 6 (SLITRK6), mRNA [NM_032229]                                                |
| A_32_P183765  | 0,02203102 up                                  | 2,06349 ERBB4 Homo sapiens erb-b2 receptor tyrosine kinase 4 (ERBB4), transcript variant JM-a/CVT-1, mRNA [NM_005235]                         |

|               |                |           |         |                                                                                                                                            |
|---------------|----------------|-----------|---------|--------------------------------------------------------------------------------------------------------------------------------------------|
| A_33_P3400217 | 0,018383147 up | 1,6902646 | SLC4A1  | Homo sapiens solute carrier family 4 (anion exchanger), member 1 (Diego blood group) (SLC4A1), mRNA [NM_000342]                            |
| A_33_P3210399 | 0,036284268 up | 1,846673  | SLC14A1 | Homo sapiens solute carrier family 14 (urea transporter), member 1 (Kidd blood group) (SLC14A1), transcript variant 4, mRNA [NM_001146037] |
| A_23_P318938  | 0,002957786 up | 2,2908568 | TMEM52B | Homo sapiens transmembrane protein 52B (TMEM52B), transcript variant 1, mRNA [NM_153022]                                                   |
| A_33_P3335511 | 0,008867103 up | 1,8473281 | FCRL5   | Homo sapiens Fc receptor-like 5 (FCRL5), transcript variant 2, mRNA [NM_001195388]                                                         |
| A_23_P319423  | 0,040168095 up | 1,9868454 | KCNK5   | Homo sapiens potassium channel, two pore domain subfamily K, member 5 (KCNK5), mRNA [NM_003740]                                            |
| A_32_P489986  | 0,032472506 up | 1,8414146 | TMEM232 | Homo sapiens transmembrane protein 232 (TMEM232), mRNA [NM_001039763]                                                                      |
| A_33_P3261957 | 0,011492129 up | 2,4471688 | CALCRL  | Homo sapiens calcitonin receptor-like (CALCRL), transcript variant 1, mRNA [NM_005795]                                                     |
