# Supplementary material for: Early Reduction of SARS-CoV-2 Replication in Bronchial Epithelium by Kinin B2 Receptor Antagonism
Source: bioRxiv or medRxiv preprint supplement (doi:10.1101/2021.08.13.21262037), 2021-08-18
Supplement: Supplementary file [file media-22.pdf]

**Supplemental Table S20.** Cut set: Membrane-bound cell surface receptor DEGs, upregulated in SARS-CoV-2 versus medium and downregulated in SARS-CoV-2 + B2R antagonist versus SARS-CoV-2

| ProbeName  | p (SARS-Co) Regulation | (f)FC (SARS-C | GeneSymbol | Description                                                                                                                                |
|------------|------------------------|---------------|------------|--------------------------------------------------------------------------------------------------------------------------------------------|
| A_23_P3553 | 0.01830276             | down          | ADAM29     | Homo sapiens ADAM metalloproteinase domain 29 (ADAM29), transcript variant 1, mRNA [NM_014289]                                             |
| A_33_P3360 | 0.03580659             | down          | ANTXR1     | Homo sapiens anthrax toxin receptor-like (ANTXR1), mRNA [NM_001278688]                                                                     |
| A_33_P3415 | 0.01891622             | down          | KCNAB6     | Homo sapiens potassium channel, voltage gated shaker related subfamily A, member 6 (KCNAB6), mRNA [NM_002235]                              |
| A_33_P3270 | 0.02106279             | down          | FAM26D     | Homo sapiens family with sequence similarity 26, member D (FAM26D), transcript variant 1, mRNA [NM_001256887]                              |
| A_23_P3863 | 0.04309718             | down          | OR1G1      | Homo sapiens olfactory receptor, family 1, subfamily G, member 1 (OR1G1), mRNA [NM_003555]                                                 |
| A_33_P3406 | 0.00964598             | down          | HTR1F      | Homo sapiens 5-hydroxytryptamine (serotonin) receptor 1F, G protein-coupled (HTR1F), mRNA [NM_000866]                                      |
| A_33_P3416 | 0.03221973             | down          | PRLR       | Homo sapiens prolactin receptor (PRLR), transcript variant 2, mRNA [NM_001204315]                                                          |
| A_24_P3450 | 0.04818654             | down          | CACNA1I    | Homo sapiens calcium channel, voltage-dependent, T type, alpha 1I subunit (CACNA1I), transcript variant 1, mRNA [NM_021096]                |
| A_33_P3396 | 0.03147338             | down          | NPY2R      | Homo sapiens neuropeptide Y receptor Y2 (NPY2R), mRNA [NM_000910]                                                                          |
| A_33_P3340 | 0.00952162             | down          | TRO        | Homo sapiens trophinin (TRO), transcript variant 3, mRNA [NM_016157]                                                                       |
| A_21_P0010 | 0.01194135             | down          | ANTXR1P1   | Homo sapiens anthrax toxin receptor-like pseudogene 1 (ANTXR1P1), transcript variant 2, non-coding RNA [NR_103828]                         |
| A_24_P1704 | 0.02440206             | down          | TREM13P    | Homo sapiens triggering receptor, expressed on myeloid cells-like 3, pseudogene (TREM13P), non-coding RNA [NR_027256]                      |
| A_33_P3355 | 0.00441775             | down          | CD226      | Homo sapiens CD226 (Source:HGNC Symbol;Acc:HGNC:16961) [ENST00000280200]                                                                   |
| A_33_P3413 | 0.03426481             | down          | CD69       | Homo sapiens CD69 (Source:HGNC Symbol;Acc:HGNC:16961) [ENST00000280200]                                                                    |
| A_33_P3241 | 0.01925859             | down          | OR13C2     | Homo sapiens olfactory receptor, family 13, subfamily C, member 2 (OR13C2), mRNA [NM_001004481]                                            |
| A_33_P3326 | 0.01507                | down          | CASR       | Homo sapiens calcium-sensing receptor (CASR), transcript variant 1, mRNA [NM_001178065]                                                    |
| A_33_P3280 | 0.00661566             | down          | TAS2R41    | Homo sapiens taste receptor, type 2, member 41 (TAS2R41), mRNA [NM_176883]                                                                 |
| A_23_P3378 | 0.01912973             | down          | P2RX7      | Homo sapiens purinergic receptor P2X, ligand-gated ion channel, 7 (P2RX7), transcript variant 1, mRNA [NM_002562]                          |
| A_24_P3191 | 0.01615628             | down          | SIT1       | Homo sapiens signaling threshold regulating transmembrane adaptor 1 (SIT1), mRNA [NM_014450]                                               |
| A_23_P4336 | 0.00974178             | down          | SYNDIG1    | PREDICTED: Homo sapiens synapse differentiation inducing 1 (SYNDIG1), transcript variant X1, mRNA [XM_006723626]                           |
| A_33_P3400 | 0.01600916             | down          | OR52N5     | Homo sapiens olfactory receptor, family 52, subfamily N, member 5 (OR52N5), mRNA [NM_001001922]                                            |
| A_33_P3211 | 0.02943458             | down          | OR6K3      | Homo sapiens olfactory receptor, family 6, subfamily K, member 3 (OR6K3), mRNA [NM_001005327]                                              |
| A_24_P3418 | 0.01164032             | down          | GRID1      | Homo sapiens glutamate receptor, ionotropic, delta 1 (GRID1), mRNA [NM_017551]                                                             |
| A_33_P3218 | 0.00842023             | down          | ENTPD1     | Homo sapiens ectonucleoside triphosphate diphosphohydrolase 1 (ENTPD1), transcript variant 1, mRNA [NM_001776]                             |
| A_23_P3265 | 0.00807711             | down          | SLC25A2    | Homo sapiens solute carrier family 25 (mitochondrial carrier, ornithine transporter) member 2 (SLC25A2), mRNA [NM_031947]                  |
| A_33_P3230 | 0.0163531              | down          | SLTRK6     | Homo sapiens SLIT and NTRK-like family, member 6 (SLTRK6), mRNA [NM_032229]                                                                |
| A_32_P1837 | 0.04826975             | down          | ERBB4      | Homo sapiens erb-b2 receptor tyrosine kinase 4 (ERBB4), transcript variant JM-a/CVT-1, mRNA [NM_005235]                                    |
| A_33_P3400 | 0.02282866             | down          | SLC4A1     | Homo sapiens solute carrier family 4 (anion exchanger), member 1 (Diego blood group) (SLC4A1), mRNA [NM_000342]                            |
| A_33_P3210 | 0.03803759             | down          | TMEM52B    | Homo sapiens solute carrier family 14 (urea transporter), member 1 (Kidd blood group) (SLC14A1), transcript variant 4, mRNA [NM_001146037] |
| A_23_P3189 | 0.02817906             | down          | FCRL5      | Homo sapiens transmembrane protein 52B (TMEM52B), transcript variant 1, mRNA [NM_153022]                                                   |
| A_33_P3335 | 0.02132568             | down          | KCNK5      | Homo sapiens Kc channel, two pore domain subfamily K, member 5 (KCNK5), mRNA [NM_003740]                                                   |
| A_23_P3194 | 0.00103116             | down          | TMEM232    | Homo sapiens transmembrane protein 232 (TMEM232), mRNA [NM_001039763]                                                                      |
| A_32_P3499 | 0.02345983             | down          | CALCL      | Homo sapiens calcitonin receptor-like (CALCL), transcript variant 1, mRNA [NM_005795]                                                      |
| A_33_P3261 | 0.04173563             | down          | CALCL      | Homo sapiens calcitonin receptor-like (CALCL), transcript variant 1, mRNA [NM_005795]                                                      |
