# Supplementary material for: Early Reduction of SARS-CoV-2 Replication in Bronchial Epithelium by Kinin B2 Receptor Antagonism
Source: bioRxiv or medRxiv preprint supplement (doi:10.1101/2021.08.13.21262037), 2021-08-18
Supplement: Supplementary file [file media-23.pdf]

### Supplemental Table S21. Reagents

| Method             | Reagent / Resource                                    | Company           | Identifier    |
|--------------------|-------------------------------------------------------|-------------------|---------------|
| Cell culture       | BEGM Bullet kit Medium                                | Lonza             | CC-3170       |
| Cell culture       | NHBE-Bronchial Epi Cells                              | LONZA             | CC-2540       |
| Cell culture       | Hexa-Peptide von Adam (Tyr-Leu-Tyr....)               | Thermo            | PEP98UNMOD    |
| Cell culture       | HOE 140 (B2R antagonist)                              | SigmaAldrich      | H157-250ug    |
| Cell culture       | 100mg Hydrocortison                                   | sigma aldrich     | H0396-100mg   |
| Cell culture       | antibiotic antimycotic                                | Thermo            | 15240062      |
| ELISA              | human ACE2 ELISA Kit                                  | abcam             | ab23564g      |
| ELISA              | Coomassie Plus Bradford Assay Kit                     | thermo fisher     | 23236         |
| RNA extraction     | Rneasy Micro Kit (50)                                 | Qiagen            | 74004         |
| RNA extraction     | QIAshredder (250)                                     | Qiagen            | 79656         |
| RNA extraction     | Rnase-Free Dnase Set                                  | Qiagen            | 79256         |
| Bioanalyzer        | agilent rna 6000 nano reagent                         | agilent           | 5067-1512     |
| Microarray         | Gene Expression Hybridisierungskit                    | Agilent           | 5188-5242     |
| Microarray         | Genexpression Wasch-Paket                             | Agilent           | 5188-5327     |
| Microarray         | Sure Print G3 Human GE V2 8x60K Kit                   | Agilent           | G4851 B       |
| Microarray         | LowInput QuickAmp Labeling Kit One-Color              | Agilent           | 5190-2305     |
| Microarray         | RNA Spike In Kit-One Color                            | Agilent           | 5188-5282     |
| Microarray         | Gasketslides                                          | Agilent           | G2534-60015   |
| Microarray         | Ethanol for molecular biology                         | vwr/Merck         | 1.085.430.250 |
| cDNA Transcription | high capacity cDNA kit                                | life technologies | 4368814       |
| PCR                | FS universal SYBR Green Master Mix                    | Sigma             | 4913850001    |
| PCR                | <i>Human TMPRSS2</i> fwd AGAGTGCGACTCCTCAGGTA         | Metabion          |               |
| PCR                | <i>Human TMPRSS2</i> rev AGGCGAACACACCGATTCTC         | Metabion          |               |
| PCR                | <i>Human ACE2</i> fwd ATGAAGGCCCTCTGCACAAA            | Metabion          |               |
| PCR                | <i>Human ACE2</i> rev CCAAGCCTCAGCATATTGAACAG         | Metabion          |               |
| PCR                | <i>Human ACTIN</i> fwd ATTGCCGACAGGATGCAGAA           | Metabion          |               |
| PCR                | <i>Human ACTIN</i> rev TCTTCATTGTGCTGGGTGCC           | Metabion          |               |
| PCR                | <i>Human HPRT</i> fwd TGACACTGGCAAACAATGCA            | Metabion          |               |
| PCR                | <i>Human HPRT</i> rev GGTCCTTTTCCACCAGCAAGCT          | Metabion          |               |
| PCR                | <i>Human 18S</i> fwd                                  | Qiagen            | 249900        |
|                    | Hs_RRN18S_1_SG QuantiTect Primer Assay                |                   | QT00199367    |
| PCR                | <i>Human 18S</i> rev                                  | Qiagen            | 249900        |
|                    | Hs_RRN18S_1_SG QuantiTect Primer Assay                |                   | QT00199367    |
| PCR                | <i>SARS-CoV-2 RdRP</i> fwd                            | Metabion          |               |
|                    | CGTCTGCGGTATGTGAAAG                                   |                   |               |
| PCR                | <i>SARS-CoV-2 RdRP</i> rev                            | Metabion          |               |
|                    | TAAGACGGGCTGCACTTACA                                  |                   |               |
| PCR                | <i>SARS-CoV-2 N1</i> fwd: GACCCAAAATCAGCGAAAT         | Metabion          |               |
| PCR                | <i>SARS-CoV-2 N1</i> rev: TCTGGTACTGCCAGTTGAATCTC     | Metabion          |               |
| PCR                | <i>SARS-CoV-2 N1</i> probe: 5'-FAM-ACC CCG CAT TAC GT | Metabion          |               |
